# Supplementary material for: Upstream open reading frames buffer translational variability during Drosophila evolution and development
Source: eLife. 2025 Jun 6;14:RP104074. doi: 10.7554/eLife.104074 (PMC12143884; doi:10.7554/eLife.104074)
Supplement: Figure 1—figure supplement 1—source data 1. [file elife-104074-fig1-figsupp1-data1.xlsx]

## Sheet: FigS1A
Rin	Distribution
2.24166e-05	Exponent
3.92565e-05	Exponent
5.74802e-05	Exponent
5.9824e-05	Exponent
9.4864e-05	Exponent
0.000105097	Exponent
0.000112819	Exponent
0.000116535	Exponent
0.000117275	Exponent
0.000138295	Exponent
0.000139894	Exponent
0.000139924	Exponent
0.00015672	Exponent
0.000180621	Exponent
0.000213503	Exponent
0.000235594	Exponent
0.000238093	Exponent
0.000248932	Exponent
0.000279829	Exponent
0.00028205	Exponent
0.000294231	Exponent
0.00030049	Exponent
0.000303009	Exponent
0.000305133	Exponent
0.000315764	Exponent
0.000329806	Exponent
0.000333422	Exponent
0.000350582	Exponent
0.000358073	Exponent
0.000398771	Exponent
0.000398931	Exponent
0.000414005	Exponent
0.000422951	Exponent
0.000473535	Exponent
0.00049416	Exponent
0.000501436	Exponent
0.000502583	Exponent
0.000521677	Exponent
0.000554596	Exponent
0.000564822	Exponent
0.000577056	Exponent
0.000581133	Exponent
0.000586977	Exponent
0.000619564	Exponent
0.000621393	Exponent
0.000624695	Exponent
0.000662413	Exponent
0.000689377	Exponent
0.000724946	Exponent
0.000756012	Exponent
0.000822034	Exponent
0.000823962	Exponent
0.000851381	Exponent
0.000863271	Exponent
0.000865986	Exponent
0.000869413	Exponent
0.000918693	Exponent
0.000945893	Exponent
0.000950905	Exponent
0.000976288	Exponent
0.000980536	Exponent
0.00105204	Exponent
0.00105794	Exponent
0.00106835	Exponent
0.00108654	Exponent
0.0011089	Exponent
0.00113072	Exponent
0.00113653	Exponent
0.00115044	Exponent
0.00116146	Exponent
0.00116429	Exponent
0.00117863	Exponent
0.00118233	Exponent
0.00119091	Exponent
0.00121925	Exponent
0.00122108	Exponent
0.00124646	Exponent
0.00124649	Exponent
0.0013274	Exponent
0.00134294	Exponent
0.00136042	Exponent
0.00136391	Exponent
0.00136519	Exponent
0.0013871	Exponent
0.00139406	Exponent
0.00139415	Exponent
0.00140259	Exponent
0.00141161	Exponent
0.00141629	Exponent
0.00141633	Exponent
0.00143218	Exponent
0.00145088	Exponent
0.0014655	Exponent
0.00148117	Exponent
0.00149441	Exponent
0.00150378	Exponent
0.00153247	Exponent
0.00153751	Exponent
0.0015607	Exponent
0.00156524	Exponent
0.00158217	Exponent
0.00164252	Exponent
0.00164557	Exponent
0.0016626	Exponent
0.00166353	Exponent
0.00166455	Exponent
0.00169163	Exponent
0.00169805	Exponent
0.00170063	Exponent
0.00171294	Exponent
0.00173631	Exponent
0.00174137	Exponent
0.0017456	Exponent
0.00180965	Exponent
0.001837	Exponent
0.00183762	Exponent
0.00184926	Exponent
0.00188558	Exponent
0.00193817	Exponent
0.00197443	Exponent
0.00199071	Exponent
0.00199959	Exponent
0.00200649	Exponent
0.00200708	Exponent
0.00200829	Exponent
0.00202737	Exponent
0.00204678	Exponent
0.00204753	Exponent
0.00206843	Exponent
0.00206985	Exponent
0.00207987	Exponent
0.00208148	Exponent
0.00208885	Exponent
0.00210745	Exponent
0.00210758	Exponent
0.00213382	Exponent
0.00215318	Exponent
0.00216874	Exponent
0.00220305	Exponent
0.00220511	Exponent
0.00220937	Exponent
0.00224221	Exponent
0.0022636	Exponent
0.00228419	Exponent
0.00228556	Exponent
0.0023008	Exponent
0.00232098	Exponent
0.00235851	Exponent
0.00237775	Exponent
0.00239293	Exponent
0.00239767	Exponent
0.00240202	Exponent
0.00240294	Exponent
0.00240374	Exponent
0.00240839	Exponent
0.00241101	Exponent
0.00242003	Exponent
0.00246599	Exponent
0.00248589	Exponent
0.00250453	Exponent
0.00250821	Exponent
0.00251895	Exponent
0.00254133	Exponent
0.00254295	Exponent
0.00259543	Exponent
0.00259571	Exponent
0.00259971	Exponent
0.00260205	Exponent
0.00260923	Exponent
0.00262301	Exponent
0.00262535	Exponent
0.00262762	Exponent
0.00262793	Exponent
0.00265961	Exponent
0.00266614	Exponent
0.00267308	Exponent
0.00267539	Exponent
0.00268737	Exponent
0.00270146	Exponent
0.00271643	Exponent
0.00271756	Exponent
0.00272534	Exponent
0.00274979	Exponent
0.00275443	Exponent
0.00276128	Exponent
0.00278043	Exponent
0.00278117	Exponent
0.00282008	Exponent
0.00288471	Exponent
0.00291355	Exponent
0.00292696	Exponent
0.0029594	Exponent
0.00296904	Exponent
0.00300447	Exponent
0.003035	Exponent
0.00303962	Exponent
0.00304261	Exponent
0.00305885	Exponent
0.00307906	Exponent
0.00310485	Exponent
0.00311042	Exponent
0.00313219	Exponent
0.00313847	Exponent
0.00314034	Exponent
0.00317393	Exponent
0.00317896	Exponent
0.00320814	Exponent
0.00321448	Exponent
0.00321461	Exponent
0.00323669	Exponent
0.0032387	Exponent
0.00327732	Exponent
0.00328085	Exponent
0.00329737	Exponent
0.00330322	Exponent
0.00332976	Exponent
0.00333319	Exponent
0.00333826	Exponent
0.00334398	Exponent
0.00334941	Exponent
0.00337532	Exponent
0.00341279	Exponent
0.00342566	Exponent
0.00343451	Exponent
0.00344147	Exponent
0.00344781	Exponent
0.00351947	Exponent
0.00354417	Exponent
0.00356056	Exponent
0.00356933	Exponent
0.00358001	Exponent
0.00358118	Exponent
0.00361279	Exponent
0.00364414	Exponent
0.00364587	Exponent
0.00366647	Exponent
0.00369781	Exponent
0.0037027	Exponent
0.00370335	Exponent
0.00372812	Exponent
0.00375678	Exponent
0.00376152	Exponent
0.00380392	Exponent
0.00380632	Exponent
0.00381205	Exponent
0.00382829	Exponent
0.00382917	Exponent
0.00385926	Exponent
0.00386961	Exponent
0.00387235	Exponent
0.00387663	Exponent
0.00390843	Exponent
0.00391569	Exponent
0.00393485	Exponent
0.00395084	Exponent
0.00396096	Exponent
0.00396189	Exponent
0.00396961	Exponent
0.004001	Exponent
0.0040401	Exponent
0.00404359	Exponent
0.00408976	Exponent
0.00409933	Exponent
0.00422147	Exponent
0.00422467	Exponent
0.00423499	Exponent
0.00428312	Exponent
0.00429419	Exponent
0.00429863	Exponent
0.00430644	Exponent
0.00433085	Exponent
0.00434068	Exponent
0.00440813	Exponent
0.00443003	Exponent
0.00446725	Exponent
0.00450492	Exponent
0.00452358	Exponent
0.00453997	Exponent
0.00455199	Exponent
0.00455732	Exponent
0.00456048	Exponent
0.00458638	Exponent
0.00458824	Exponent
0.00459398	Exponent
0.00459669	Exponent
0.00460816	Exponent
0.00460837	Exponent
0.00461672	Exponent
0.00462008	Exponent
0.0046676	Exponent
0.0046711	Exponent
0.00469205	Exponent
0.00469408	Exponent
0.00475368	Exponent
0.00476093	Exponent
0.00481812	Exponent
0.00486051	Exponent
0.00486788	Exponent
0.00491406	Exponent
0.00492202	Exponent
0.00494131	Exponent
0.0050881	Exponent
0.00509561	Exponent
0.00510398	Exponent
0.0051081	Exponent
0.0051363	Exponent
0.00516379	Exponent
0.00516722	Exponent
0.00524367	Exponent
0.00525022	Exponent
0.00528425	Exponent
0.00530387	Exponent
0.00532666	Exponent
0.00534882	Exponent
0.00536908	Exponent
0.00537124	Exponent
0.00538693	Exponent
0.00551736	Exponent
0.00551982	Exponent
0.00552616	Exponent
0.00557685	Exponent
0.0056097	Exponent
0.00561446	Exponent
0.00561536	Exponent
0.0056269	Exponent
0.00562907	Exponent
0.00568505	Exponent
0.00568565	Exponent
0.0056949	Exponent
0.00570762	Exponent
0.00571551	Exponent
0.00577195	Exponent
0.0057829	Exponent
0.00583211	Exponent
0.00585123	Exponent
0.00587151	Exponent
0.00587828	Exponent
0.00589967	Exponent
0.00590927	Exponent
0.00591929	Exponent
0.00597388	Exponent
0.00600841	Exponent
0.00602494	Exponent
0.00602503	Exponent
0.0060346	Exponent
0.00604759	Exponent
0.00606306	Exponent
0.00607017	Exponent
0.0061399	Exponent
0.00615496	Exponent
0.00618258	Exponent
0.00618599	Exponent
0.00620949	Exponent
0.00624481	Exponent
0.00625067	Exponent
0.00628136	Exponent
0.00631543	Exponent
0.00637204	Exponent
0.00637744	Exponent
0.00639957	Exponent
0.00640121	Exponent
0.00640646	Exponent
0.00642369	Exponent
0.0064321	Exponent
0.00649899	Exponent
0.00650572	Exponent
0.00654264	Exponent
0.00658086	Exponent
0.00659887	Exponent
0.00662324	Exponent
0.00666554	Exponent
0.00673049	Exponent
0.00675416	Exponent
0.00675873	Exponent
0.00677873	Exponent
0.00679471	Exponent
0.00680063	Exponent
0.00683561	Exponent
0.00685557	Exponent
0.00687767	Exponent
0.0068921	Exponent
0.00693455	Exponent
0.00694093	Exponent
0.00696922	Exponent
0.0069703	Exponent
0.00698226	Exponent
0.00698776	Exponent
0.00702732	Exponent
0.00702965	Exponent
0.00703313	Exponent
0.00704724	Exponent
0.00706903	Exponent
0.00708324	Exponent
0.00708806	Exponent
0.00712221	Exponent
0.00712565	Exponent
0.0071425	Exponent
0.00719878	Exponent
0.00721204	Exponent
0.00722624	Exponent
0.00725868	Exponent
0.0072789	Exponent
0.00734088	Exponent
0.00743615	Exponent
0.00745326	Exponent
0.00750047	Exponent
0.00750551	Exponent
0.00754053	Exponent
0.00755646	Exponent
0.00756628	Exponent
0.00758275	Exponent
0.00761636	Exponent
0.00763887	Exponent
0.0076654	Exponent
0.00774672	Exponent
0.00787042	Exponent
0.00787897	Exponent
0.00791345	Exponent
0.00792407	Exponent
0.00799016	Exponent
0.00799898	Exponent
0.00799984	Exponent
0.00800203	Exponent
0.00800931	Exponent
0.00803086	Exponent
0.00804733	Exponent
0.00806824	Exponent
0.00810835	Exponent
0.00812401	Exponent
0.00817372	Exponent
0.0082008	Exponent
0.00820229	Exponent
0.00821228	Exponent
0.00821381	Exponent
0.00822231	Exponent
0.00822915	Exponent
0.00823679	Exponent
0.00823953	Exponent
0.00824631	Exponent
0.00829032	Exponent
0.0083025	Exponent
0.00837009	Exponent
0.00837872	Exponent
0.00837889	Exponent
0.00842704	Exponent
0.00842884	Exponent
0.00843613	Exponent
0.00844058	Exponent
0.00846729	Exponent
0.00848285	Exponent
0.008484	Exponent
0.00853695	Exponent
0.00862696	Exponent
0.00870613	Exponent
0.00872566	Exponent
0.00878217	Exponent
0.00878675	Exponent
0.00883088	Exponent
0.00884985	Exponent
0.00886627	Exponent
0.00886796	Exponent
0.00892117	Exponent
0.00896922	Exponent
0.00900551	Exponent
0.00900913	Exponent
0.00906357	Exponent
0.00907332	Exponent
0.00907986	Exponent
0.00910506	Exponent
0.00912421	Exponent
0.00913634	Exponent
0.00913759	Exponent
0.00914716	Exponent
0.00915615	Exponent
0.00915917	Exponent
0.00919319	Exponent
0.00919653	Exponent
0.00919721	Exponent
0.00922715	Exponent
0.00923283	Exponent
0.00926345	Exponent
0.00927105	Exponent
0.00927199	Exponent
0.00930408	Exponent
0.00931801	Exponent
0.00934815	Exponent
0.00939654	Exponent
0.00940353	Exponent
0.00941375	Exponent
0.00945939	Exponent
0.00951085	Exponent
0.00952686	Exponent
0.00955957	Exponent
0.00956889	Exponent
0.0096363	Exponent
0.00971124	Exponent
0.0097261	Exponent
0.00975685	Exponent
0.00978787	Exponent
0.00980297	Exponent
0.00982961	Exponent
0.00983065	Exponent
0.00986789	Exponent
0.00987045	Exponent
0.00988355	Exponent
0.00997994	Exponent
0.00999217	Exponent
0.00999669	Exponent
0.0100222	Exponent
0.0100365	Exponent
0.0101118	Exponent
0.0101199	Exponent
0.0101337	Exponent
0.0101758	Exponent
0.0102121	Exponent
0.0102165	Exponent
0.0102171	Exponent
0.0102399	Exponent
0.010243	Exponent
0.0102531	Exponent
0.010277	Exponent
0.0102832	Exponent
0.0102979	Exponent
0.0103105	Exponent
0.0103182	Exponent
0.0103987	Exponent
0.0104113	Exponent
0.0104593	Exponent
0.0104907	Exponent
0.0104985	Exponent
0.0105231	Exponent
0.0105401	Exponent
0.0105842	Exponent
0.0106249	Exponent
0.0106473	Exponent
0.0106496	Exponent
0.01065	Exponent
0.0106721	Exponent
0.0106725	Exponent
0.0106834	Exponent
0.0106878	Exponent
0.0107637	Exponent
0.0107638	Exponent
0.0108006	Exponent
0.0108445	Exponent
0.0109348	Exponent
0.0109406	Exponent
0.0109424	Exponent
0.0109524	Exponent
0.0109535	Exponent
0.0109569	Exponent
0.0110376	Exponent
0.0111239	Exponent
0.01116	Exponent
0.0112023	Exponent
0.0112157	Exponent
0.0112407	Exponent
0.0112418	Exponent
0.011265	Exponent
0.0113074	Exponent
0.0113075	Exponent
0.0113355	Exponent
0.0113646	Exponent
0.0113876	Exponent
0.0114206	Exponent
0.0114822	Exponent
0.0115187	Exponent
0.0115908	Exponent
0.0116106	Exponent
0.0116158	Exponent
0.0116368	Exponent
0.0116743	Exponent
0.0116822	Exponent
0.0116923	Exponent
0.0117004	Exponent
0.0117045	Exponent
0.011802	Exponent
0.0118149	Exponent
0.0118334	Exponent
0.0118965	Exponent
0.0119221	Exponent
0.0119828	Exponent
0.0119949	Exponent
0.0120039	Exponent
0.0120329	Exponent
0.0120745	Exponent
0.0122385	Exponent
0.0122424	Exponent
0.012402	Exponent
0.0124558	Exponent
0.0124638	Exponent
0.0124828	Exponent
0.0124927	Exponent
0.0125813	Exponent
0.0125938	Exponent
0.0126157	Exponent
0.0126538	Exponent
0.0126741	Exponent
0.0127745	Exponent
0.012795	Exponent
0.0128035	Exponent
0.0128252	Exponent
0.0128254	Exponent
0.0128595	Exponent
0.0130472	Exponent
0.0131358	Exponent
0.0132831	Exponent
0.0132901	Exponent
0.0133342	Exponent
0.0134342	Exponent
0.0134997	Exponent
0.0135374	Exponent
0.0136018	Exponent
0.0136668	Exponent
0.0136728	Exponent
0.0136767	Exponent
0.0137161	Exponent
0.0138025	Exponent
0.0138682	Exponent
0.0138706	Exponent
0.0138786	Exponent
0.0139314	Exponent
0.0139686	Exponent
0.01399	Exponent
0.0140157	Exponent
0.0140337	Exponent
0.0140535	Exponent
0.0141206	Exponent
0.0141548	Exponent
0.0141728	Exponent
0.0141785	Exponent
0.0141866	Exponent
0.0142499	Exponent
0.0142789	Exponent
0.0142899	Exponent
0.0143012	Exponent
0.014336	Exponent
0.0143776	Exponent
0.0144346	Exponent
0.0144529	Exponent
0.0145058	Exponent
0.0146237	Exponent
0.0146967	Exponent
0.0147535	Exponent
0.014769	Exponent
0.0147938	Exponent
0.0147975	Exponent
0.014828	Exponent
0.014858	Exponent
0.014943	Exponent
0.0149835	Exponent
0.0150442	Exponent
0.0150555	Exponent
0.0150688	Exponent
0.0151318	Exponent
0.0151379	Exponent
0.0151895	Exponent
0.0151959	Exponent
0.0151963	Exponent
0.0152134	Exponent
0.0152659	Exponent
0.0152846	Exponent
0.0152947	Exponent
0.0153254	Exponent
0.0153419	Exponent
0.0154468	Exponent
0.0154859	Exponent
0.015507	Exponent
0.0156154	Exponent
0.0156277	Exponent
0.0158065	Exponent
0.0158115	Exponent
0.0158205	Exponent
0.0158829	Exponent
0.0158905	Exponent
0.0159289	Exponent
0.0159413	Exponent
0.0159418	Exponent
0.016038	Exponent
0.0161352	Exponent
0.0161401	Exponent
0.0161614	Exponent
0.0161623	Exponent
0.0161684	Exponent
0.0162859	Exponent
0.0163397	Exponent
0.016396	Exponent
0.0165318	Exponent
0.0166096	Exponent
0.0166614	Exponent
0.0166987	Exponent
0.0167648	Exponent
0.016883	Exponent
0.0169105	Exponent
0.016958	Exponent
0.0170059	Exponent
0.0171233	Exponent
0.017151	Exponent
0.0171791	Exponent
0.0172166	Exponent
0.0172575	Exponent
0.0173248	Exponent
0.0173969	Exponent
0.0174338	Exponent
0.0175011	Exponent
0.0175041	Exponent
0.0175703	Exponent
0.0177043	Exponent
0.0177047	Exponent
0.0178183	Exponent
0.0178899	Exponent
0.0179229	Exponent
0.017941	Exponent
0.0179544	Exponent
0.0180051	Exponent
0.018206	Exponent
0.0182152	Exponent
0.0182245	Exponent
0.0183453	Exponent
0.018353	Exponent
0.0183605	Exponent
0.018379	Exponent
0.0184102	Exponent
0.0184352	Exponent
0.0184857	Exponent
0.0185638	Exponent
0.0185844	Exponent
0.0186418	Exponent
0.0187168	Exponent
0.0187817	Exponent
0.0187989	Exponent
0.018857	Exponent
0.0188619	Exponent
0.0189478	Exponent
0.0190171	Exponent
0.0190869	Exponent
0.0192288	Exponent
0.0192311	Exponent
0.0192664	Exponent
0.0192925	Exponent
0.0193122	Exponent
0.019353	Exponent
0.0193881	Exponent
0.0194308	Exponent
0.0194561	Exponent
0.0197247	Exponent
0.0198085	Exponent
0.0199162	Exponent
0.0200511	Exponent
0.0201548	Exponent
0.0202143	Exponent
0.0202478	Exponent
0.0202625	Exponent
0.0203199	Exponent
0.0204212	Exponent
0.0204928	Exponent
0.0206014	Exponent
0.0206187	Exponent
0.0210174	Exponent
0.0211292	Exponent
0.0212048	Exponent
0.0213039	Exponent
0.0213155	Exponent
0.0214303	Exponent
0.0214477	Exponent
0.021533	Exponent
0.0215642	Exponent
0.0215826	Exponent
0.0216558	Exponent
0.0216925	Exponent
0.0217335	Exponent
0.0218192	Exponent
0.0218989	Exponent
0.021954	Exponent
0.0220934	Exponent
0.0221469	Exponent
0.0222659	Exponent
0.022272	Exponent
0.0224292	Exponent
0.0224541	Exponent
0.0225268	Exponent
0.0225933	Exponent
0.0227152	Exponent
0.0228522	Exponent
0.0229057	Exponent
0.022958	Exponent
0.0231516	Exponent
0.0234273	Exponent
0.0234444	Exponent
0.0234581	Exponent
0.0235254	Exponent
0.0235575	Exponent
0.0236972	Exponent
0.0237123	Exponent
0.0239562	Exponent
0.0240291	Exponent
0.0240561	Exponent
0.0240598	Exponent
0.0240923	Exponent
0.0241017	Exponent
0.0241765	Exponent
0.0241903	Exponent
0.0241951	Exponent
0.0242299	Exponent
0.0244049	Exponent
0.0244482	Exponent
0.0244609	Exponent
0.0245089	Exponent
0.024658	Exponent
0.0247146	Exponent
0.0247626	Exponent
0.0247823	Exponent
0.0250459	Exponent
0.0250765	Exponent
0.0253661	Exponent
0.0254411	Exponent
0.0254478	Exponent
0.0255352	Exponent
0.0255573	Exponent
0.0255818	Exponent
0.0256488	Exponent
0.0257025	Exponent
0.0257428	Exponent
0.025906	Exponent
0.025924	Exponent
0.0259261	Exponent
0.0260759	Exponent
0.0261315	Exponent
0.0261952	Exponent
0.0262083	Exponent
0.0263877	Exponent
0.0264362	Exponent
0.026505	Exponent
0.0266085	Exponent
0.0266939	Exponent
0.0267213	Exponent
0.026729	Exponent
0.0267694	Exponent
0.0267825	Exponent
0.0267946	Exponent
0.0268002	Exponent
0.0268221	Exponent
0.0268777	Exponent
0.0269015	Exponent
0.026922	Exponent
0.0270518	Exponent
0.027067	Exponent
0.0270675	Exponent
0.0270703	Exponent
0.0271079	Exponent
0.0272566	Exponent
0.0273063	Exponent
0.027339	Exponent
0.0273702	Exponent
0.0274489	Exponent
0.0276797	Exponent
0.0277229	Exponent
0.0278639	Exponent
0.0279294	Exponent
0.0280802	Exponent
0.0281738	Exponent
0.0283332	Exponent
0.0283381	Exponent
0.028341	Exponent
0.0284544	Exponent
0.028465	Exponent
0.0285468	Exponent
0.0285727	Exponent
0.0286973	Exponent
0.0287616	Exponent
0.0289133	Exponent
0.0290941	Exponent
0.0294535	Exponent
0.0296581	Exponent
0.0298521	Exponent
0.0299386	Exponent
0.0302218	Exponent
0.0302942	Exponent
0.030308	Exponent
0.0304565	Exponent
0.0306425	Exponent
0.0311432	Exponent
0.0312184	Exponent
0.0312253	Exponent
0.0313721	Exponent
0.0313887	Exponent
0.0316455	Exponent
0.031924	Exponent
0.0320075	Exponent
0.0320821	Exponent
0.0327128	Exponent
0.0327354	Exponent
0.0327381	Exponent
0.0327687	Exponent
0.0328086	Exponent
0.0330425	Exponent
0.0330439	Exponent
0.0330806	Exponent
0.0332546	Exponent
0.0332893	Exponent
0.033534	Exponent
0.0335891	Exponent
0.0336572	Exponent
0.0338283	Exponent
0.034168	Exponent
0.0344381	Exponent
0.0348089	Exponent
0.0348634	Exponent
0.0351492	Exponent
0.0352516	Exponent
0.0353347	Exponent
0.0354033	Exponent
0.0354895	Exponent
0.0355621	Exponent
0.0356422	Exponent
0.0358236	Exponent
0.0358259	Exponent
0.0361247	Exponent
0.036175	Exponent
0.0364567	Exponent
0.0364925	Exponent
0.0365007	Exponent
0.0368052	Exponent
0.0369035	Exponent
0.0373993	Exponent
0.0375839	Exponent
0.037854	Exponent
0.0381553	Exponent
0.0382949	Exponent
0.0387443	Exponent
0.0389228	Exponent
0.0389875	Exponent
0.0389919	Exponent
0.0398482	Exponent
0.0402429	Exponent
0.0403302	Exponent
0.0411362	Exponent
0.0414918	Exponent
0.0417592	Exponent
0.041818	Exponent
0.0421907	Exponent
0.0423028	Exponent
0.0424981	Exponent
0.042587	Exponent
0.04342	Exponent
0.0436594	Exponent
0.04366	Exponent
0.0441097	Exponent
0.0443163	Exponent
0.0443619	Exponent
0.0445705	Exponent
0.0447359	Exponent
0.0447558	Exponent
0.0450715	Exponent
0.0452758	Exponent
0.0457647	Exponent
0.0458057	Exponent
0.0458823	Exponent
0.0463901	Exponent
0.0470106	Exponent
0.0470299	Exponent
0.0473842	Exponent
0.0475405	Exponent
0.047543	Exponent
0.0482455	Exponent
0.049892	Exponent
0.0502562	Exponent
0.0505399	Exponent
0.05116	Exponent
0.0512189	Exponent
0.0512776	Exponent
0.0524728	Exponent
0.0525781	Exponent
0.0529659	Exponent
0.0537703	Exponent
0.0539276	Exponent
0.054144	Exponent
0.0542854	Exponent
0.0546274	Exponent
0.0557342	Exponent
0.0567202	Exponent
0.0572675	Exponent
0.0578349	Exponent
0.0579741	Exponent
0.0585016	Exponent
0.0591489	Exponent
0.0591954	Exponent
0.0591968	Exponent
0.0592067	Exponent
0.059297	Exponent
0.0595317	Exponent
0.0610686	Exponent
0.0613047	Exponent
0.0649825	Exponent
0.0665013	Exponent
0.0788859	Exponent
0.0804162	Exponent
0.0846977	Exponent
0.0870641	Exponent
0.0941012	Exponent
0.000363299	Uniform
0.000504091	Uniform
0.000593113	Uniform
0.000604815	Uniform
0.000731464	Uniform
0.000738945	Uniform
0.000822411	Uniform
0.000929855	Uniform
0.000935199	Uniform
0.000955678	Uniform
0.00102098	Uniform
0.00106095	Uniform
0.00109089	Uniform
0.00109622	Uniform
0.00137832	Uniform
0.00156837	Uniform
0.00162643	Uniform
0.00162675	Uniform
0.00167574	Uniform
0.00176809	Uniform
0.00182759	Uniform
0.00190198	Uniform
0.00215383	Uniform
0.00216939	Uniform
0.00235055	Uniform
0.00248799	Uniform
0.00250646	Uniform
0.00265028	Uniform
0.00268297	Uniform
0.00271849	Uniform
0.00287731	Uniform
0.00302699	Uniform
0.00314481	Uniform
0.0031489	Uniform
0.00320417	Uniform
0.00324814	Uniform
0.00327869	Uniform
0.00328552	Uniform
0.00339877	Uniform
0.00347996	Uniform
0.00348623	Uniform
0.00362068	Uniform
0.00382825	Uniform
0.00399336	Uniform
0.00413505	Uniform
0.00415992	Uniform
0.00425123	Uniform
0.00431325	Uniform
0.00434016	Uniform
0.00436471	Uniform
0.00445391	Uniform
0.00464427	Uniform
0.0047549	Uniform
0.00479293	Uniform
0.00487268	Uniform
0.00491584	Uniform
0.00495348	Uniform
0.00500866	Uniform
0.00501722	Uniform
0.00505928	Uniform
0.00519333	Uniform
0.00523255	Uniform
0.00525923	Uniform
0.0053508	Uniform
0.00538214	Uniform
0.00540327	Uniform
0.00541688	Uniform
0.0055266	Uniform
0.00555024	Uniform
0.00558637	Uniform
0.00564762	Uniform
0.00564974	Uniform
0.00567127	Uniform
0.0057281	Uniform
0.00626113	Uniform
0.00627727	Uniform
0.00638919	Uniform
0.00643745	Uniform
0.00654289	Uniform
0.00655133	Uniform
0.00698762	Uniform
0.00710671	Uniform
0.00723764	Uniform
0.0072737	Uniform
0.00728938	Uniform
0.00736492	Uniform
0.00746805	Uniform
0.00755971	Uniform
0.00757077	Uniform
0.00764201	Uniform
0.00765399	Uniform
0.00781569	Uniform
0.00784226	Uniform
0.0079117	Uniform
0.00812867	Uniform
0.00816772	Uniform
0.00827501	Uniform
0.00831652	Uniform
0.00839611	Uniform
0.00840174	Uniform
0.00854853	Uniform
0.0086318	Uniform
0.00863428	Uniform
0.00866362	Uniform
0.00877538	Uniform
0.00890032	Uniform
0.00894614	Uniform
0.00902125	Uniform
0.00929279	Uniform
0.00933818	Uniform
0.00934904	Uniform
0.00944256	Uniform
0.00949759	Uniform
0.00963011	Uniform
0.00970454	Uniform
0.00976522	Uniform
0.00994724	Uniform
0.0100013	Uniform
0.0101811	Uniform
0.0103028	Uniform
0.010638	Uniform
0.0106691	Uniform
0.010742	Uniform
0.0107421	Uniform
0.0107568	Uniform
0.0108368	Uniform
0.0108677	Uniform
0.0111057	Uniform
0.0111333	Uniform
0.0111797	Uniform
0.0111995	Uniform
0.01154	Uniform
0.0116153	Uniform
0.0116295	Uniform
0.0116462	Uniform
0.0116902	Uniform
0.0119697	Uniform
0.0119936	Uniform
0.0120303	Uniform
0.0120709	Uniform
0.0121988	Uniform
0.0122835	Uniform
0.0123148	Uniform
0.0125634	Uniform
0.0128074	Uniform
0.0129758	Uniform
0.0130282	Uniform
0.0133704	Uniform
0.0133942	Uniform
0.0135002	Uniform
0.0135437	Uniform
0.0136622	Uniform
0.013736	Uniform
0.0137627	Uniform
0.0141378	Uniform
0.0141987	Uniform
0.0142048	Uniform
0.0143673	Uniform
0.0144967	Uniform
0.0145495	Uniform
0.014618	Uniform
0.0146438	Uniform
0.014902	Uniform
0.0149395	Uniform
0.014984	Uniform
0.0153902	Uniform
0.0154563	Uniform
0.0154682	Uniform
0.0154873	Uniform
0.0154876	Uniform
0.0156484	Uniform
0.0156604	Uniform
0.01575	Uniform
0.0158031	Uniform
0.0158239	Uniform
0.0159729	Uniform
0.0161028	Uniform
0.0162958	Uniform
0.0163158	Uniform
0.0163913	Uniform
0.016441	Uniform
0.0165023	Uniform
0.0165046	Uniform
0.0165573	Uniform
0.0165671	Uniform
0.0167462	Uniform
0.0167551	Uniform
0.0170208	Uniform
0.0172494	Uniform
0.0172786	Uniform
0.0173743	Uniform
0.0176906	Uniform
0.01782	Uniform
0.0179106	Uniform
0.0179827	Uniform
0.017989	Uniform
0.018033	Uniform
0.0181036	Uniform
0.0181161	Uniform
0.0182216	Uniform
0.018323	Uniform
0.0185251	Uniform
0.0185402	Uniform
0.0186257	Uniform
0.0188957	Uniform
0.0189649	Uniform
0.0192045	Uniform
0.0192217	Uniform
0.0193931	Uniform
0.0194891	Uniform
0.0195455	Uniform
0.0201504	Uniform
0.020153	Uniform
0.0203068	Uniform
0.0203884	Uniform
0.0204737	Uniform
0.0204847	Uniform
0.0205439	Uniform
0.0206877	Uniform
0.0208673	Uniform
0.0209273	Uniform
0.0209571	Uniform
0.0210165	Uniform
0.0210527	Uniform
0.0210635	Uniform
0.0211275	Uniform
0.0212231	Uniform
0.0212537	Uniform
0.0213182	Uniform
0.0214081	Uniform
0.0215115	Uniform
0.0216074	Uniform
0.0216933	Uniform
0.0217607	Uniform
0.0218832	Uniform
0.0219777	Uniform
0.0219977	Uniform
0.022246	Uniform
0.0223714	Uniform
0.0223851	Uniform
0.0224094	Uniform
0.0225708	Uniform
0.0226051	Uniform
0.0227485	Uniform
0.0227584	Uniform
0.0228982	Uniform
0.0229008	Uniform
0.0229241	Uniform
0.0231463	Uniform
0.0232201	Uniform
0.0233784	Uniform
0.0235756	Uniform
0.0238955	Uniform
0.0240652	Uniform
0.0240766	Uniform
0.0240998	Uniform
0.0241838	Uniform
0.0242171	Uniform
0.0245213	Uniform
0.0246002	Uniform
0.0247046	Uniform
0.0247452	Uniform
0.0247666	Uniform
0.0248212	Uniform
0.0248541	Uniform
0.0248573	Uniform
0.0249308	Uniform
0.0249688	Uniform
0.0249727	Uniform
0.0250302	Uniform
0.0250311	Uniform
0.0250362	Uniform
0.0251002	Uniform
0.0251931	Uniform
0.0252176	Uniform
0.025442	Uniform
0.0254799	Uniform
0.0255536	Uniform
0.0255914	Uniform
0.0256193	Uniform
0.0257029	Uniform
0.0257434	Uniform
0.0257439	Uniform
0.0259032	Uniform
0.0260548	Uniform
0.0262209	Uniform
0.0263401	Uniform
0.0263718	Uniform
0.0267017	Uniform
0.0267504	Uniform
0.0268294	Uniform
0.0268446	Uniform
0.0270464	Uniform
0.0270814	Uniform
0.0271102	Uniform
0.0271581	Uniform
0.0276038	Uniform
0.02772	Uniform
0.0278308	Uniform
0.0278884	Uniform
0.0280459	Uniform
0.0281617	Uniform
0.0282309	Uniform
0.0283596	Uniform
0.0284354	Uniform
0.0284623	Uniform
0.0284692	Uniform
0.0285138	Uniform
0.0285415	Uniform
0.0285485	Uniform
0.0286663	Uniform
0.028719	Uniform
0.0287334	Uniform
0.0287356	Uniform
0.0288346	Uniform
0.0290706	Uniform
0.0291081	Uniform
0.0291608	Uniform
0.029226	Uniform
0.0294326	Uniform
0.0294541	Uniform
0.0295064	Uniform
0.0295285	Uniform
0.0295945	Uniform
0.0297067	Uniform
0.0298613	Uniform
0.0299314	Uniform
0.0299503	Uniform
0.0299549	Uniform
0.0301132	Uniform
0.0301404	Uniform
0.0303373	Uniform
0.0304653	Uniform
0.0304828	Uniform
0.0305775	Uniform
0.030599	Uniform
0.0306774	Uniform
0.0306852	Uniform
0.0307414	Uniform
0.0308861	Uniform
0.0309341	Uniform
0.0310107	Uniform
0.0311633	Uniform
0.0313941	Uniform
0.0315445	Uniform
0.0316413	Uniform
0.0317093	Uniform
0.031781	Uniform
0.0318719	Uniform
0.0324801	Uniform
0.0325547	Uniform
0.0329693	Uniform
0.0331567	Uniform
0.0333155	Uniform
0.0335674	Uniform
0.0335686	Uniform
0.0336373	Uniform
0.0336626	Uniform
0.0337632	Uniform
0.0339132	Uniform
0.0343673	Uniform
0.0343954	Uniform
0.0345181	Uniform
0.0347178	Uniform
0.0347228	Uniform
0.0347803	Uniform
0.0348916	Uniform
0.0350696	Uniform
0.035079	Uniform
0.0351255	Uniform
0.0351693	Uniform
0.0353184	Uniform
0.0353871	Uniform
0.0355925	Uniform
0.0356413	Uniform
0.0356663	Uniform
0.0357989	Uniform
0.0362739	Uniform
0.0363053	Uniform
0.0363579	Uniform
0.0364062	Uniform
0.0364318	Uniform
0.0364948	Uniform
0.0365617	Uniform
0.0367391	Uniform
0.0368946	Uniform
0.037059	Uniform
0.03727	Uniform
0.0374139	Uniform
0.0375221	Uniform
0.0377131	Uniform
0.0377347	Uniform
0.037745	Uniform
0.0377897	Uniform
0.0379782	Uniform
0.0380398	Uniform
0.0381228	Uniform
0.0382349	Uniform
0.0382694	Uniform
0.0383994	Uniform
0.0384082	Uniform
0.0385166	Uniform
0.0388956	Uniform
0.0390156	Uniform
0.0393797	Uniform
0.0394641	Uniform
0.0395422	Uniform
0.0396471	Uniform
0.0397058	Uniform
0.0398958	Uniform
0.0402756	Uniform
0.040361	Uniform
0.0404019	Uniform
0.0404767	Uniform
0.0405768	Uniform
0.0406817	Uniform
0.0407243	Uniform
0.0407787	Uniform
0.0408509	Uniform
0.0410496	Uniform
0.0411053	Uniform
0.0411168	Uniform
0.041294	Uniform
0.0415423	Uniform
0.0415666	Uniform
0.0417881	Uniform
0.0420052	Uniform
0.0420242	Uniform
0.0420282	Uniform
0.0421714	Uniform
0.0423901	Uniform
0.0426387	Uniform
0.042647	Uniform
0.0428204	Uniform
0.0428322	Uniform
0.042943	Uniform
0.042943	Uniform
0.0433353	Uniform
0.0433909	Uniform
0.0433977	Uniform
0.043448	Uniform
0.0435304	Uniform
0.0435519	Uniform
0.0435641	Uniform
0.043818	Uniform
0.0438656	Uniform
0.0440023	Uniform
0.0441547	Uniform
0.0444236	Uniform
0.0444313	Uniform
0.0445785	Uniform
0.0446706	Uniform
0.0447496	Uniform
0.044871	Uniform
0.0448892	Uniform
0.0449207	Uniform
0.0449679	Uniform
0.0451677	Uniform
0.0451956	Uniform
0.0451977	Uniform
0.0452014	Uniform
0.0452921	Uniform
0.0453357	Uniform
0.0454391	Uniform
0.0455222	Uniform
0.0455345	Uniform
0.0456503	Uniform
0.0458915	Uniform
0.0459852	Uniform
0.046033	Uniform
0.0461377	Uniform
0.0461592	Uniform
0.0465145	Uniform
0.046709	Uniform
0.0467583	Uniform
0.0468313	Uniform
0.0468494	Uniform
0.0468804	Uniform
0.0469902	Uniform
0.0470386	Uniform
0.0470843	Uniform
0.0472783	Uniform
0.0473053	Uniform
0.0474108	Uniform
0.0475413	Uniform
0.0475974	Uniform
0.0476642	Uniform
0.0476743	Uniform
0.0477024	Uniform
0.0477162	Uniform
0.0477635	Uniform
0.0478572	Uniform
0.0478968	Uniform
0.0480566	Uniform
0.0481963	Uniform
0.0485131	Uniform
0.0485571	Uniform
0.0485813	Uniform
0.0488238	Uniform
0.0488726	Uniform
0.049066	Uniform
0.0493355	Uniform
0.0494218	Uniform
0.0495373	Uniform
0.0495748	Uniform
0.0495835	Uniform
0.049606	Uniform
0.0497077	Uniform
0.0497508	Uniform
0.0501187	Uniform
0.05013	Uniform
0.050148	Uniform
0.050163	Uniform
0.0501788	Uniform
0.0502167	Uniform
0.0503491	Uniform
0.050496	Uniform
0.0505577	Uniform
0.0506291	Uniform
0.0507206	Uniform
0.0507291	Uniform
0.0508188	Uniform
0.0508318	Uniform
0.0510138	Uniform
0.051136	Uniform
0.0514467	Uniform
0.0518336	Uniform
0.0518837	Uniform
0.0520251	Uniform
0.0523559	Uniform
0.0525211	Uniform
0.0525311	Uniform
0.0525638	Uniform
0.0528597	Uniform
0.0529436	Uniform
0.0530328	Uniform
0.053082	Uniform
0.0531764	Uniform
0.0533297	Uniform
0.053337	Uniform
0.0534523	Uniform
0.0537971	Uniform
0.0540937	Uniform
0.0541517	Uniform
0.0541675	Uniform
0.0541686	Uniform
0.0543931	Uniform
0.0545944	Uniform
0.0548681	Uniform
0.0548683	Uniform
0.0549073	Uniform
0.054982	Uniform
0.0550444	Uniform
0.0550817	Uniform
0.0551355	Uniform
0.0551961	Uniform
0.0552826	Uniform
0.0555152	Uniform
0.0556239	Uniform
0.0556257	Uniform
0.0557339	Uniform
0.0558921	Uniform
0.0560914	Uniform
0.0561732	Uniform
0.0563051	Uniform
0.0563242	Uniform
0.0563317	Uniform
0.0563367	Uniform
0.0564548	Uniform
0.0564884	Uniform
0.0565649	Uniform
0.0566352	Uniform
0.0566636	Uniform
0.0568141	Uniform
0.05703	Uniform
0.057082	Uniform
0.0571147	Uniform
0.057235	Uniform
0.0575805	Uniform
0.0577368	Uniform
0.0577536	Uniform
0.057878	Uniform
0.0580258	Uniform
0.0580659	Uniform
0.0581894	Uniform
0.0582758	Uniform
0.0583601	Uniform
0.0584111	Uniform
0.0584244	Uniform
0.0584402	Uniform
0.0585726	Uniform
0.0585858	Uniform
0.0586185	Uniform
0.0586829	Uniform
0.0587883	Uniform
0.0588051	Uniform
0.0588507	Uniform
0.0588743	Uniform
0.0589364	Uniform
0.0590149	Uniform
0.0590219	Uniform
0.0590706	Uniform
0.0592229	Uniform
0.0592612	Uniform
0.0593373	Uniform
0.0593903	Uniform
0.0594288	Uniform
0.0597352	Uniform
0.059825	Uniform
0.059967	Uniform
0.0600309	Uniform
0.0600895	Uniform
0.0602784	Uniform
0.0603209	Uniform
0.0604647	Uniform
0.0604788	Uniform
0.0605516	Uniform
0.0607394	Uniform
0.0607686	Uniform
0.0608667	Uniform
0.0609871	Uniform
0.0611351	Uniform
0.0611434	Uniform
0.0611439	Uniform
0.0611784	Uniform
0.0611914	Uniform
0.0612138	Uniform
0.061215	Uniform
0.0614091	Uniform
0.0617109	Uniform
0.0617756	Uniform
0.0618109	Uniform
0.0618941	Uniform
0.0619276	Uniform
0.0619649	Uniform
0.0621379	Uniform
0.0622074	Uniform
0.0625092	Uniform
0.062514	Uniform
0.0627949	Uniform
0.0628343	Uniform
0.0628445	Uniform
0.0628896	Uniform
0.06313	Uniform
0.0632955	Uniform
0.063365	Uniform
0.0634189	Uniform
0.0634385	Uniform
0.063502	Uniform
0.0635024	Uniform
0.0637383	Uniform
0.0640587	Uniform
0.0642123	Uniform
0.0642216	Uniform
0.0642369	Uniform
0.0644029	Uniform
0.0645259	Uniform
0.0645669	Uniform
0.0648509	Uniform
0.0650075	Uniform
0.0651722	Uniform
0.0653976	Uniform
0.065406	Uniform
0.0654503	Uniform
0.0654927	Uniform
0.0655871	Uniform
0.0656142	Uniform
0.0656193	Uniform
0.0657022	Uniform
0.0657738	Uniform
0.0659972	Uniform
0.0661422	Uniform
0.0661814	Uniform
0.0661934	Uniform
0.0662104	Uniform
0.0663551	Uniform
0.0664027	Uniform
0.0666606	Uniform
0.0667497	Uniform
0.0668149	Uniform
0.0668441	Uniform
0.0669089	Uniform
0.0670013	Uniform
0.0670562	Uniform
0.0671406	Uniform
0.0674447	Uniform
0.0677808	Uniform
0.0678457	Uniform
0.0678616	Uniform
0.0679991	Uniform
0.0681296	Uniform
0.0681508	Uniform
0.0683499	Uniform
0.068431	Uniform
0.0685204	Uniform
0.0685542	Uniform
0.0685582	Uniform
0.0687943	Uniform
0.0688512	Uniform
0.0688609	Uniform
0.0688781	Uniform
0.0690161	Uniform
0.0690264	Uniform
0.0690279	Uniform
0.0690634	Uniform
0.0690974	Uniform
0.0692096	Uniform
0.0692398	Uniform
0.0693135	Uniform
0.0694996	Uniform
0.0695194	Uniform
0.0697115	Uniform
0.0697474	Uniform
0.069806	Uniform
0.0698709	Uniform
0.0699786	Uniform
0.0700284	Uniform
0.070121	Uniform
0.070173	Uniform
0.0702598	Uniform
0.0704627	Uniform
0.070478	Uniform
0.0706611	Uniform
0.0707626	Uniform
0.0708189	Uniform
0.0708201	Uniform
0.0708833	Uniform
0.0709409	Uniform
0.0709596	Uniform
0.0709681	Uniform
0.0709969	Uniform
0.0710223	Uniform
0.0710847	Uniform
0.0711402	Uniform
0.0711456	Uniform
0.0712158	Uniform
0.0712917	Uniform
0.0713009	Uniform
0.0714352	Uniform
0.071462	Uniform
0.0714768	Uniform
0.0715497	Uniform
0.0718634	Uniform
0.0719257	Uniform
0.0720069	Uniform
0.072014	Uniform
0.0723621	Uniform
0.0724497	Uniform
0.0725818	Uniform
0.0730577	Uniform
0.0734651	Uniform
0.0734711	Uniform
0.0734786	Uniform
0.0734955	Uniform
0.0736052	Uniform
0.0736214	Uniform
0.0736849	Uniform
0.0737085	Uniform
0.0737828	Uniform
0.0738266	Uniform
0.0739497	Uniform
0.0740775	Uniform
0.0742926	Uniform
0.0743324	Uniform
0.0744832	Uniform
0.0744863	Uniform
0.0745267	Uniform
0.0745871	Uniform
0.0747468	Uniform
0.0748469	Uniform
0.0749394	Uniform
0.0750737	Uniform
0.0751366	Uniform
0.0751502	Uniform
0.0753069	Uniform
0.0756299	Uniform
0.0758034	Uniform
0.0758939	Uniform
0.0758987	Uniform
0.0761382	Uniform
0.0761498	Uniform
0.0761731	Uniform
0.0762042	Uniform
0.0762171	Uniform
0.0762624	Uniform
0.0762926	Uniform
0.0763059	Uniform
0.0764904	Uniform
0.0765795	Uniform
0.0767181	Uniform
0.076824	Uniform
0.0768302	Uniform
0.0770224	Uniform
0.0771086	Uniform
0.0774437	Uniform
0.077655	Uniform
0.0778166	Uniform
0.0778243	Uniform
0.0778311	Uniform
0.0778373	Uniform
0.0778724	Uniform
0.0779225	Uniform
0.0780459	Uniform
0.078233	Uniform
0.0783582	Uniform
0.0783596	Uniform
0.0783847	Uniform
0.078433	Uniform
0.0784787	Uniform
0.0785122	Uniform
0.0786765	Uniform
0.0787673	Uniform
0.0790661	Uniform
0.0791245	Uniform
0.0791727	Uniform
0.0793042	Uniform
0.079409	Uniform
0.0794439	Uniform
0.0794597	Uniform
0.0794686	Uniform
0.0796725	Uniform
0.0800681	Uniform
0.0801242	Uniform
0.0802658	Uniform
0.0803279	Uniform
0.0803592	Uniform
0.0806228	Uniform
0.0806674	Uniform
0.0808178	Uniform
0.0808384	Uniform
0.0809495	Uniform
0.0812038	Uniform
0.0813876	Uniform
0.0814789	Uniform
0.0815881	Uniform
0.0816585	Uniform
0.081803	Uniform
0.0819063	Uniform
0.08194	Uniform
0.0820144	Uniform
0.08204	Uniform
0.0821486	Uniform
0.0821846	Uniform
0.0822812	Uniform
0.082387	Uniform
0.08261	Uniform
0.0826634	Uniform
0.0827305	Uniform
0.0827764	Uniform
0.08292	Uniform
0.0829326	Uniform
0.0829744	Uniform
0.0829997	Uniform
0.0830074	Uniform
0.0832788	Uniform
0.083283	Uniform
0.0833814	Uniform
0.0833821	Uniform
0.083385	Uniform
0.0836416	Uniform
0.0839753	Uniform
0.0840557	Uniform
0.0840794	Uniform
0.0843378	Uniform
0.0843921	Uniform
0.0846857	Uniform
0.0847523	Uniform
0.0847862	Uniform
0.0847986	Uniform
0.0849837	Uniform
0.085069	Uniform
0.0851158	Uniform
0.0852787	Uniform
0.0853112	Uniform
0.0854489	Uniform
0.0855083	Uniform
0.0855351	Uniform
0.0855673	Uniform
0.0856568	Uniform
0.0856972	Uniform
0.085872	Uniform
0.086062	Uniform
0.0860786	Uniform
0.0863355	Uniform
0.0866719	Uniform
0.0866889	Uniform
0.0866947	Uniform
0.0867089	Uniform
0.0868224	Uniform
0.0869317	Uniform
0.0869433	Uniform
0.0869591	Uniform
0.0870086	Uniform
0.0870647	Uniform
0.0871003	Uniform
0.0871118	Uniform
0.0871468	Uniform
0.0871523	Uniform
0.0872065	Uniform
0.0874	Uniform
0.0876625	Uniform
0.0877563	Uniform
0.0879572	Uniform
0.0880473	Uniform
0.0881268	Uniform
0.0881793	Uniform
0.0882246	Uniform
0.0882585	Uniform
0.0882887	Uniform
0.0883687	Uniform
0.0884783	Uniform
0.0884982	Uniform
0.0885591	Uniform
0.0886852	Uniform
0.0887341	Uniform
0.0887616	Uniform
0.0890906	Uniform
0.0891434	Uniform
0.089361	Uniform
0.08937	Uniform
0.0894249	Uniform
0.0894821	Uniform
0.0895246	Uniform
0.0898606	Uniform
0.0899051	Uniform
0.0899632	Uniform
0.0900199	Uniform
0.0902915	Uniform
0.0903382	Uniform
0.0903874	Uniform
0.0905344	Uniform
0.0905529	Uniform
0.0905617	Uniform
0.0907417	Uniform
0.0907861	Uniform
0.0907881	Uniform
0.0909201	Uniform
0.0910462	Uniform
0.0911899	Uniform
0.0913059	Uniform
0.0913228	Uniform
0.091339	Uniform
0.0913766	Uniform
0.0913851	Uniform
0.0917466	Uniform
0.091867	Uniform
0.0919127	Uniform
0.0920993	Uniform
0.0921126	Uniform
0.0922427	Uniform
0.0924784	Uniform
0.0925564	Uniform
0.0925705	Uniform
0.0927646	Uniform
0.092812	Uniform
0.0928444	Uniform
0.0930008	Uniform
0.093301	Uniform
0.0934187	Uniform
0.0939068	Uniform
0.0941064	Uniform
0.094181	Uniform
0.0944646	Uniform
0.0945845	Uniform
0.0947043	Uniform
0.094804	Uniform
0.0952677	Uniform
0.0956913	Uniform
0.0957994	Uniform
0.0960511	Uniform
0.0960729	Uniform
0.0961867	Uniform
0.0963849	Uniform
0.0964664	Uniform
0.0965943	Uniform
0.0966098	Uniform
0.0966412	Uniform
0.0968742	Uniform
0.0971059	Uniform
0.0975086	Uniform
0.0975853	Uniform
0.0976016	Uniform
0.0976688	Uniform
0.0979881	Uniform
0.0980054	Uniform
0.0982021	Uniform
0.09822	Uniform
0.0990385	Uniform
0.0991371	Uniform
0.0991898	Uniform
0.0992456	Uniform
0.0993444	Uniform
0.0993661	Uniform
0.0994705	Uniform
0.0994975	Uniform
0.0995475	Uniform
0.0995653	Uniform
0.0996134	Uniform
0.0997118	Uniform
[truncated: 1 more rows]
