# Supplementary material for: Upstream open reading frames buffer translational variability during Drosophila evolution and development
Source: eLife. 2025 Jun 6;14:RP104074. doi: 10.7554/eLife.104074 (PMC12143884; doi:10.7554/eLife.104074)
Supplement: Figure 1—figure supplement 2—source data 1. [file elife-104074-fig1-figsupp2-data1.xlsx]

## Sheet: Fig S2A
		I_CDS
		0.1	0.2	0.3	0.4	0.5	0.6	0.7	0.8	0.9	1
I_uORF	0	4888	8032	10267	11982	13332	14418	15312	16039	16694	17270
	0.1	2940	4910	6303	7376	8216	8898	9451	9925	10315	10662
	0.2	1954	3272	4229	4958	5524	5983	6361	6677	6947	7179
	0.3	1342	2256	2922	3420	3815	4139	4395	4619	4802	4960
	0.4	938	1584	2045	2402	2676	2894	3081	3237	3367	3483
	0.5	659	1108	1435	1681	1878	2030	2163	2272	2358	2438

## Sheet: Fig S2B
		I_CDS
		0.1	0.2	0.3	0.4	0.5	0.6	0.7	0.8	0.9	1
I_uORF	0	4699	7640	9768	11403	12699	13727	14640	15370	16022	16580
	0.1	2912	4818	6169	7242	8050	8718	9244	9724	10130	10439
	0.2	2001	3336	4324	5042	5607	6092	6455	6776	7077	7304
	0.3	1432	2400	3094	3617	4038	4374	4648	4890	5093	5270
	0.4	1038	1739	2248	2632	2942	3186	3389	3558	3711	3829
	0.5	746	1257	1626	1903	2129	2310	2446	2575	2679	2762

## Sheet: Fig S2C
		I_CDS
		0.1	0.2	0.3	0.4	0.5	0.6	0.7	0.8	0.9	1
I_uORF	0	4756	7750	9894	11524	12787	13826	14686	15406	16040	16579
	0.1	2622	4357	5592	6532	7270	7882	8370	8789	9135	9431
	0.2	1687	2814	3633	4247	4724	5125	5451	5724	5940	6151
	0.3	1144	1923	2485	2905	3245	3511	3733	3913	4072	4215
	0.4	800	1343	1735	2034	2266	2456	2614	2745	2858	2958
	0.5	560	943	1213	1429	1594	1730	1837	1927	2006	2076
