# Supplementary material for: Upstream open reading frames buffer translational variability during Drosophila evolution and development
Source: eLife. 2025 Jun 6;14:RP104074. doi: 10.7554/eLife.104074 (PMC12143884; doi:10.7554/eLife.104074)
Supplement: Figure 1—figure supplement 3—source data 1. [file elife-104074-fig1-figsupp3-data1.xlsx]

## Sheet: Fig S3A
		I_CDS
		0.1	0.2	0.3	0.4	0.5	0.6	0.7	0.8	0.9	1
I_uORF	0	2032	3403	4365	5091	5679	6163	6545	6887	7148	7386
	0.1	1411	2356	3047	3556	3965	4324	4566	4801	5022	5181
	0.2	1018	1706	2210	2594	2917	3149	3346	3497	3640	3753
	0.3	765	1275	1644	1918	2156	2326	2480	2596	2689	2794
	0.4	565	945	1218	1423	1597	1733	1830	1923	2012	2059
	0.5	413	694	896	1058	1175	1282	1347	1418	1477	1530

## Sheet: Fig S3B
		I_CDS
		0.1	0.2	0.3	0.4	0.5	0.6	0.7	0.8	0.9	1
I_uORF	0	2002	3316	4327	5019	5620	6095	6461	6778	7074	7282
	0.1	1390	2349	3002	3540	3922	4249	4509	4759	4896	5120
	0.2	1009	1699	2185	2574	2846	3098	3302	3454	3601	3708
	0.3	743	1250	1619	1898	2110	2299	2447	2580	2666	2761
	0.4	556	934	1190	1416	1578	1702	1821	1905	1990	2055
	0.5	407	696	879	1044	1167	1267	1336	1416	1462	1514

## Sheet: Fig S3C
		I_CDS
		0.1	0.2	0.3	0.4	0.5	0.6	0.7	0.8	0.9	1
I_uORF	0	1993	3340	4307	5051	5612	6077	6508	6775	7057	7291
	0.1	1357	2252	2940	3415	3798	4151	4371	4616	4826	4956
	0.2	960	1620	2070	2451	2707	2958	3121	3316	3426	3563
	0.3	699	1175	1538	1792	1973	2151	2285	2401	2513	2591
	0.4	519	866	1121	1309	1459	1594	1691	1773	1852	1915
	0.5	381	625	824	961	1068	1162	1238	1296	1352	1407
