# Supplementary material for: Upstream open reading frames buffer translational variability during Drosophila evolution and development
Source: eLife. 2025 Jun 6;14:RP104074. doi: 10.7554/eLife.104074 (PMC12143884; doi:10.7554/eLife.104074)
Supplement: Figure 1—figure supplement 4—source data 1. [file elife-104074-fig1-figsupp4-data1.xlsx]

## Sheet: Fig S4A
		I_CDS
		0.1	0.2	0.3	0.4	0.5	0.6	0.7	0.8	0.9	1
I_uORF	0	0.324227	0.318026	0.316522	0.316014	0.315909	0.31616	0.316699	0.31659	0.317065	0.317275
	0.1	0.298414	0.295784	0.294416	0.294202	0.293632	0.293768	0.293533	0.293921	0.29387	0.294304
	0.2	0.286953	0.285441	0.284274	0.284199	0.283792	0.283425	0.283584	0.284023	0.284194	0.283797
	0.3	0.280494	0.279138	0.278196	0.277011	0.277933	0.277134	0.277086	0.277505	0.277048	0.277411
	0.4	0.275165	0.273887	0.273225	0.272735	0.273386	0.272466	0.273018	0.27277	0.272697	0.272931
	0.5	0.272094	0.269623	0.269501	0.269164	0.269787	0.26887	0.268968	0.268319	0.268589	0.268734

## Sheet: Fig S4B
		I_CDS
		0.1	0.2	0.3	0.4	0.5	0.6	0.7	0.8	0.9	1
I_uORF	0	0.327982	0.322036	0.319538	0.318347	0.318007	0.317682	0.317422	0.317722	0.31709	0.317454
	0.1	0.280803	0.278398	0.277338	0.276531	0.276017	0.275899	0.27568	0.27628	0.276237	0.275667
	0.2	0.258711	0.257578	0.256404	0.256245	0.256322	0.256103	0.256483	0.255923	0.255687	0.255535
	0.3	0.246324	0.243845	0.244272	0.243093	0.243338	0.24285	0.242344	0.242146	0.242813	0.242568
	0.4	0.237106	0.234491	0.234146	0.23294	0.232569	0.233177	0.233271	0.233039	0.233151	0.233732
	0.5	0.229667	0.228299	0.226511	0.226905	0.226137	0.226746	0.225463	0.225718	0.226081	0.225099
