# Supplementary material for: Upstream open reading frames buffer translational variability during Drosophila evolution and development
Source: eLife. 2025 Jun 6;14:RP104074. doi: 10.7554/eLife.104074 (PMC12143884; doi:10.7554/eLife.104074)
Supplement: Figure 1—figure supplement 5—source data 1. [file elife-104074-fig1-figsupp5-data1.xlsx]

## Sheet: FigS5A
		I_CDS
		0.1	0.2	0.3	0.4	0.5	0.6	0.7	0.8	0.9	1
I_uORF	0	0.649514	0.643161	0.640695	0.639268	0.637752	0.638192	0.637807	0.63766	0.637577	0.637468
	0.1	0.602279	0.598955	0.597856	0.59714	0.596608	0.597136	0.596869	0.596633	0.595773	0.596793
	0.2	0.576994	0.574999	0.574554	0.574524	0.573332	0.573566	0.573172	0.572446	0.572578	0.573609
	0.3	0.558358	0.558309	0.556868	0.557944	0.555898	0.556579	0.557044	0.555691	0.556508	0.555917
	0.4	0.545925	0.545186	0.544516	0.544889	0.54385	0.544124	0.543595	0.543972	0.544047	0.544295
	0.5	0.538417	0.53509	0.53544	0.535257	0.536013	0.535805	0.53613	0.533468	0.533509	0.535576

## Sheet: FigS5B
		I_CDS
		0.1	0.2	0.3	0.4	0.5	0.6	0.7	0.8	0.9	1
I_uORF	0	0.63796	0.631268	0.627842	0.626391	0.62574	0.626217	0.626649	0.626563	0.62712	0.628118
	0.1	0.59917	0.595562	0.5943	0.593054	0.59191	0.59201	0.592674	0.592399	0.593211	0.592822
	0.2	0.581064	0.580353	0.57771	0.577966	0.577595	0.576942	0.576749	0.576929	0.576398	0.57648
	0.3	0.57169	0.568495	0.568179	0.567874	0.566189	0.567007	0.567311	0.566535	0.566674	0.566715
	0.4	0.561786	0.560803	0.561368	0.560003	0.55894	0.560368	0.559832	0.559395	0.559601	0.559466
	0.5	0.554991	0.555266	0.556267	0.553573	0.554222	0.555135	0.554791	0.554379	0.55431	0.554339

## Sheet: FigS5C
		I_CDS
		0.1	0.2	0.3	0.4	0.5	0.6	0.7	0.8	0.9	1
I_uORF	0	0.643452	0.634875	0.631578	0.630064	0.628491	0.628105	0.627531	0.627557	0.627315	0.627317
	0.1	0.57689	0.572465	0.571053	0.570044	0.570043	0.569179	0.570153	0.569566	0.569476	0.569289
	0.2	0.545904	0.541582	0.541343	0.541242	0.540972	0.542133	0.539916	0.54094	0.540382	0.540819
	0.3	0.524954	0.524069	0.522717	0.523001	0.521785	0.522341	0.52236	0.52221	0.521401	0.521583
	0.4	0.513775	0.512808	0.509954	0.50787	0.508698	0.51051	0.508677	0.507619	0.507913	0.508759
	0.5	0.501661	0.500345	0.499445	0.499655	0.499205	0.498392	0.499252	0.498454	0.499207	0.499476
