# Supplementary material for: Upstream open reading frames buffer translational variability during Drosophila evolution and development
Source: eLife. 2025 Jun 6;14:RP104074. doi: 10.7554/eLife.104074 (PMC12143884; doi:10.7554/eLife.104074)
Supplement: Figure 1—figure supplement 6—source data 1. [file elife-104074-fig1-figsupp6-data1.xlsx]

## Sheet: FigS6A
		uORF length(codons)
		2	10	20	30	40	50	100
I_uORF	0	0.317802	0.317641	0.317326	0.317189	0.316782	0.316923	0.316496
	0.1	0.315301	0.304853	0.298701	0.293681	0.289685	0.286441	0.273084
	0.2	0.315416	0.301351	0.291255	0.284059	0.277476	0.27236	0.2522
	0.3	0.316197	0.299605	0.286729	0.277419	0.269793	0.262826	0.23688
	0.4	0.317386	0.299493	0.283995	0.272695	0.263285	0.255267	0.224714
	0.5	0.318398	0.298932	0.281598	0.26926	0.25726	0.248734	0.214292

## Sheet: FigS6B
		uORF length(codons)
		2	10	20	30	40	50	100
I_uORF	0	0.318242	0.317631	0.317706	0.317539	0.317412	0.317151	0.316744
	0.1	0.313757	0.295749	0.28403	0.275872	0.269378	0.263873	0.24266
	0.2	0.314274	0.28777	0.268733	0.255899	0.245442	0.236431	0.205363
	0.3	0.314929	0.28381	0.259549	0.241768	0.228233	0.217456	0.185328
	0.4	0.315614	0.281212	0.253426	0.232658	0.217074	0.205059	0.184329
	0.5	0.316237	0.279909	0.248132	0.225198	0.209255	0.197364	0.19236
