# Supplementary material for: Upstream open reading frames buffer translational variability during Drosophila evolution and development
Source: eLife. 2025 Jun 6;14:RP104074. doi: 10.7554/eLife.104074 (PMC12143884; doi:10.7554/eLife.104074)
Supplement: Figure 1—figure supplement 8—source data 1. [file elife-104074-fig1-figsupp8-data1.xlsx]

## Sheet: FigS8A
		I_CDS
		0.1	0.2	0.3	0.4	0.5	0.6	0.7	0.8	0.9	1
I_uORF	0.1	0.927	0.94	0.941	0.94	0.944	0.948	0.952	0.945	0.955	0.95
	0.2	0.852	0.876	0.866	0.883	0.871	0.89	0.885	0.869	0.883	0.874
	0.3	0.749	0.771	0.763	0.769	0.731	0.774	0.756	0.747	0.741	0.757
	0.4	0.637	0.628	0.617	0.625	0.612	0.622	0.603	0.581	0.589	0.599
	0.5	0.48	0.489	0.481	0.464	0.457	0.446	0.456	0.467	0.458	0.438

## Sheet: FigS8B
		I_CDS
		0.1	0.2	0.3	0.4	0.5	0.6	0.7	0.8	0.9	1
I_uORF	0.1	0.941	0.946	0.952	0.954	0.957	0.955	0.957	0.956	0.958	0.961
	0.2	0.91	0.938	0.941	0.943	0.95	0.949	0.946	0.95	0.947	0.95
	0.3	0.908	0.912	0.926	0.925	0.939	0.932	0.932	0.938	0.942	0.935
	0.4	0.888	0.909	0.909	0.911	0.912	0.929	0.925	0.924	0.926	0.928
	0.5	0.85	0.881	0.888	0.897	0.903	0.899	0.903	0.906	0.906	0.909

## Sheet: FigS8C
		I_CDS
		0.1	0.2	0.3	0.4	0.5	0.6	0.7	0.8	0.9	1
I_uORF	0.1	0.903	0.913	0.928	0.929	0.92	0.93	0.93	0.933	0.926	0.93
	0.2	0.831	0.828	0.857	0.853	0.86	0.856	0.86	0.866	0.862	0.872
	0.3	0.738	0.742	0.763	0.761	0.757	0.766	0.768	0.749	0.764	0.778
	0.4	0.662	0.673	0.647	0.635	0.654	0.649	0.666	0.651	0.645	0.669
	0.5	0.559	0.58	0.574	0.559	0.572	0.598	0.564	0.556	0.542	0.573
