# Supplementary material for: Upstream open reading frames buffer translational variability during Drosophila evolution and development
Source: eLife. 2025 Jun 6;14:RP104074. doi: 10.7554/eLife.104074 (PMC12143884; doi:10.7554/eLife.104074)
Supplement: Figure 1—figure supplement 9—source data 1. [file elife-104074-fig1-figsupp9-data1.xlsx]

## Sheet: FigS9A
		I_CDS
		0.1	0.2	0.3	0.4	0.5	0.6	0.7	0.8	0.9	1
I_uORF	0.1	0.999	0.999	0.999	0.999	0.999	0.999	0.999	0.999	0.999	0.999
	0.2	0.998	0.999	0.999	0.999	0.999	0.999	0.999	0.999	0.999	0.999
	0.3	0.997	0.998	0.998	0.998	0.999	0.999	0.999	0.999	0.999	0.999
	0.4	0.995	0.996	0.997	0.997	0.997	0.998	0.997	0.998	0.998	0.998
	0.5	0.992	0.994	0.995	0.994	0.995	0.995	0.996	0.996	0.996	0.996

## Sheet: FigS9B
		I_CDS
		0.1	0.2	0.3	0.4	0.5	0.6	0.7	0.8	0.9	1
I_uORF	0.1	0.999	0.999	0.999	0.999	0.999	0.999	0.999	0.999	0.999	0.999
	0.2	0.998	0.999	0.999	0.999	0.999	0.999	0.999	0.999	0.999	0.999
	0.3	0.997	0.998	0.999	0.999	0.999	0.999	0.999	0.999	0.999	0.999
	0.4	0.997	0.998	0.998	0.998	0.999	0.999	0.999	0.999	0.999	0.999
	0.5	0.996	0.997	0.998	0.998	0.998	0.998	0.998	0.998	0.998	0.999

## Sheet: FigS9C
		I_CDS
		0.1	0.2	0.3	0.4	0.5	0.6	0.7	0.8	0.9	1
I_uORF	0.1	0.998	0.999	0.999	0.999	0.999	0.999	0.999	0.999	0.999	0.999
	0.2	0.997	0.998	0.998	0.998	0.999	0.999	0.999	0.999	0.999	0.999
	0.3	0.996	0.997	0.998	0.998	0.998	0.998	0.998	0.998	0.998	0.998
	0.4	0.992	0.995	0.996	0.996	0.997	0.996	0.997	0.997	0.997	0.997
	0.5	0.987	0.991	0.992	0.994	0.994	0.995	0.995	0.994	0.995	0.995
