# Supplementary material for: Upstream open reading frames buffer translational variability during Drosophila evolution and development
Source: eLife. 2025 Jun 6;14:RP104074. doi: 10.7554/eLife.104074 (PMC12143884; doi:10.7554/eLife.104074)
Supplement: Figure 1—figure supplement 10—source data 1. [file elife-104074-fig1-figsupp10-data1.xlsx]

## Sheet: FigS10A
		I_CDS
		0.1	0.2	0.3	0.4	0.5	0.6	0.7	0.8	0.9	1
I_uORF	0.1	-0.0464203	-0.0539073	-0.0498983	-0.0315427	-0.034181	-0.0477051	-0.0642502	-0.0399025	-0.0535949	-0.060134
	0.2	-0.0458903	-0.0487485	-0.0464	-0.053255	-0.048899	-0.0291397	-0.0271534	-0.0160593	-0.0473971	-0.0379504
	0.3	-0.042607	-0.0504052	-0.0542338	-0.0527329	-0.0444418	-0.0331215	-0.0451358	-0.046212	-0.0435145	-0.0484233
	0.4	-0.0378568	-0.0427462	-0.0491533	-0.0504971	-0.0393106	-0.0408932	-0.053582	-0.0437518	-0.0475771	-0.0427951
	0.5	-0.0298629	-0.0437047	-0.0477027	-0.0502103	-0.0529458	-0.0493911	-0.0417999	-0.0480556	-0.056998	-0.0375286

## Sheet: FigS10B
		I_CDS
		0.1	0.2	0.3	0.4	0.5	0.6	0.7	0.8	0.9	1
I_uORF	0.1	-0.0752369	-0.0583874	-0.0983218	-0.0781609	-0.0801298	-0.0834441	-0.0663243	-0.102333	-0.0646923	-0.0655386
	0.2	-0.0751895	-0.0818831	-0.0499547	-0.101669	-0.0566264	-0.082995	-0.0915735	-0.0770063	-0.0730153	-0.074392
	0.3	-0.069903	-0.0675959	-0.0793823	-0.087279	-0.0793067	-0.086017	-0.0899623	-0.0851423	-0.0818711	-0.0971154
	0.4	-0.0560354	-0.074883	-0.0690386	-0.0729438	-0.066084	-0.0731557	-0.0560172	-0.0804292	-0.070672	-0.0746337
	0.5	-0.0436711	-0.059792	-0.0724057	-0.0746587	-0.0680057	-0.0698713	-0.074864	-0.0659479	-0.0799389	-0.0488249
