# Supplementary material for: Upstream open reading frames buffer translational variability during Drosophila evolution and development
Source: eLife. 2025 Jun 6;14:RP104074. doi: 10.7554/eLife.104074 (PMC12143884; doi:10.7554/eLife.104074)
Supplement: Figure 1—figure supplement 11—source data 1. [file elife-104074-fig1-figsupp11-data1.xlsx]

## Sheet: FigS11A
		I_CDS
		0.1	0.2	0.3	0.4	0.5	0.6	0.7	0.8	0.9	1
I_uORF	0.1	-0.0612283	-0.0613724	-0.0585455	-0.0675147	-0.0587205	-0.0629322	-0.059191	-0.0592847	-0.0577823	-0.0634045
	0.2	-0.0789503	-0.0761087	-0.082703	-0.0838859	-0.0728139	-0.0742324	-0.0726012	-0.0926153	-0.105378	-0.0787783
	0.3	-0.0942327	-0.114835	-0.102319	-0.102807	-0.0859719	-0.0837234	-0.088547	-0.0868357	-0.0940444	-0.0978445
	0.4	-0.10586	-0.0981496	-0.101215	-0.134557	-0.0982374	-0.113886	-0.101635	-0.109729	-0.102747	-0.0968683
	0.5	-0.120184	-0.116541	-0.0974168	-0.150528	-0.146357	-0.106053	-0.0974162	-0.10334	-0.12995	-0.114825

## Sheet: FigS11B
		I_CDS
		0.1	0.2	0.3	0.4	0.5	0.6	0.7	0.8	0.9	1
I_uORF	0.1	-0.0374913	-0.0659586	-0.0417184	-0.043841	-0.0448187	-0.0443791	-0.0453816	-0.0489071	-0.0425258	-0.0450509
	0.2	-0.0438129	-0.0385847	-0.0462563	-0.044788	-0.047032	-0.0557997	-0.0448353	-0.0475817	-0.0531313	-0.0520476
	0.3	-0.0493047	-0.0526729	-0.0507792	-0.0506093	-0.0532888	-0.0563996	-0.0498538	-0.0513642	-0.0524786	-0.0499994
	0.4	-0.0642685	-0.0523674	-0.051491	-0.0551306	-0.0568346	-0.0541324	-0.0612456	-0.0582047	-0.0586898	-0.0537569
	0.5	-0.0636771	-0.0590241	-0.0483591	-0.0578695	-0.0561835	-0.0580364	-0.0636556	-0.063181	-0.056321	-0.0544271

## Sheet: FigS11C
		I_CDS
		0.1	0.2	0.3	0.4	0.5	0.6	0.7	0.8	0.9	1
I_uORF	0.1	-0.0659529	-0.0738077	-0.0799976	-0.0806552	-0.0757833	-0.0711069	-0.0650607	-0.0721787	-0.0702967	-0.0695599
	0.2	-0.091165	-0.0875644	-0.0981505	-0.0878148	-0.1038	-0.0849614	-0.0875487	-0.0827247	-0.0891111	-0.0919733
	0.3	-0.107012	-0.0994368	-0.112191	-0.0977546	-0.118262	-0.100526	-0.115477	-0.12191	-0.109938	-0.0996798
	0.4	-0.106951	-0.123238	-0.128115	-0.130509	-0.111553	-0.10903	-0.116928	-0.112526	-0.106552	-0.118417
	0.5	-0.139711	-0.137916	-0.141971	-0.152002	-0.12353	-0.126678	-0.12832	-0.125691	-0.137811	-0.118449
