# Supplementary material for: Upstream open reading frames buffer translational variability during Drosophila evolution and development
Source: eLife. 2025 Jun 6;14:RP104074. doi: 10.7554/eLife.104074 (PMC12143884; doi:10.7554/eLife.104074)
Supplement: Figure 1—figure supplement 12—source data 1. [file elife-104074-fig1-figsupp12-data1.xlsx]

## Sheet: FigS12B
		I_uORF1
		0	0.1	0.2	0.3	0.4
I_uORF2	0	0.323644	0.292048	0.27411	0.260426	0.249837
	0.1	0.292435	0.278762	0.27071	0.264565	0.259519
	0.2	0.273826	0.265978	0.260128	0.257575	0.25484
	0.3	0.260076	0.255287	0.251481	0.249513	0.249451
	0.4	0.249329	0.245707	0.244549	0.244289	0.24213

## Sheet: FigS12C
		I_uORF1
		0	0.1	0.2	0.3	0.4
I_uORF2	0	16696	10305	6941	4813	3380
	0.1	10319	6897	4873	3519	2563
	0.2	6938	4778	3430	2514	1851
	0.3	4803	3360	2445	1809	1343
	0.4	3365	2384	1745	1301	968

## Sheet: FigS12D
		I_uORF1
		0.1	0.2	0.3	0.4
I_uORF2	0.1	0.934	0.896	0.864	0.844
	0.2	0.845	0.814	0.784	0.783
	0.3	0.722	0.716	0.692	0.694
	0.4	0.563	0.581	0.57	0.552

## Sheet: FigS12E
		I_uORF1
		0.1	0.2	0.3	0.4
I_uORF2	0.1	-0.0727013	-0.091963	-0.140198	-0.0990844
	0.2	-0.123423	-0.128085	-0.120323	-0.129265
	0.3	-0.123234	-0.126988	-0.0991355	-0.12017
	0.4	-0.116868	-0.0973705	-0.113556	-0.0982453
