# Supplementary material for: Upstream open reading frames buffer translational variability during Drosophila evolution and development
Source: eLife. 2025 Jun 6;14:RP104074. doi: 10.7554/eLife.104074 (PMC12143884; doi:10.7554/eLife.104074)
Supplement: Figure 1—figure supplement 13—source data 1. [file elife-104074-fig1-figsupp13-data1.xlsx]

## Sheet: FigS13
I_uORF1	I_uORF2	cv_ratio
0	0	1.00006
0	0.1	0.936071
0	0.2	0.898922
0	0.3	0.872851
0	0.4	0.853789
0	0.5	0.839189
0.1	0	1.00113
0.1	0.1	0.969423
0.1	0.2	0.948242
0.1	0.3	0.933438
0.1	0.4	0.922938
0.1	0.5	0.913205
0.2	0	1.00065
0.2	0.1	0.981102
0.2	0.2	0.96466
0.2	0.3	0.956657
0.2	0.4	0.950184
0.2	0.5	0.946903
0.3	0	1.00091
0.3	0.1	0.987265
0.3	0.2	0.97681
0.3	0.3	0.969635
0.3	0.4	0.965305
0.3	0.5	0.962474
0.4	0	0.998312
0.4	0.1	0.99203
0.4	0.2	0.983897
0.4	0.3	0.980882
0.4	0.4	0.9775
0.4	0.5	0.975629
0.5	0	1.00165
0.5	0.1	0.994798
0.5	0.2	0.991141
0.5	0.3	0.988152
0.5	0.4	0.985416
0.5	0.5	0.990216
