# Supplementary material for: Upstream open reading frames buffer translational variability during Drosophila evolution and development
Source: eLife. 2025 Jun 6;14:RP104074. doi: 10.7554/eLife.104074 (PMC12143884; doi:10.7554/eLife.104074)
Supplement: Figure 1—source data 1. [file elife-104074-fig1-data1.xlsx]

## Sheet: Fig 1B
Heatmap
		I_CDS
		0.1	0.2	0.3	0.4	0.5	0.6	0.7	0.8	0.9	1
I_uORF	0	0.332801	0.328164	0.326337	0.325286	0.324892	0.32475	0.324413	0.324137	0.324135	0.32433
	0.1	0.296677	0.294556	0.293094	0.293289	0.29258	0.292836	0.292719	0.292811	0.29263	0.292325
	0.2	0.276903	0.275142	0.274694	0.274674	0.273917	0.274129	0.273701	0.27361	0.274143	0.273966
	0.3	0.261904	0.261832	0.260714	0.260161	0.260274	0.260018	0.260495	0.260319	0.259979	0.260184
	0.4	0.252546	0.251282	0.249528	0.249787	0.249424	0.249965	0.24897	0.249774	0.249466	0.249515
	0.5	0.244042	0.242227	0.242198	0.241549	0.241749	0.242539	0.24126	0.241734	0.240917	0.241423
Case_plot
Without uORFs, CV=0.32			With uORFs, CV=0.25
Actions	NEC		Actions	NEC
1	361		1	84
2	477		2	142
3	508		3	166
4	534		4	164
5	683		5	192
6	674		6	189
7	728		7	227
8	856		8	257
9	802		9	240
10	856		10	276
11	937		11	267
12	945		12	295
13	970		13	306
14	1015		14	305
15	1209		15	366
16	1365		16	423
17	1451		17	477
18	1384		18	400
19	1437		19	441
20	1603		20	448
21	1640		21	452
22	1746		22	518
23	1846		23	549
24	1834		24	579
25	2079		25	553
26	2105		26	627
27	2091		27	604
28	2314		28	690
29	2298		29	681
30	2315		30	714
31	2420		31	709
32	2491		32	834
33	2668		33	822
34	2647		34	824
35	2774		35	812
36	2690		36	889
37	2763		37	857
38	2804		38	837
39	2850		39	838
40	2906		40	895
41	2938		41	839
42	2993		42	909
43	3180		43	963
44	3217		44	1023
45	3450		45	971
46	3416		46	1062
47	3486		47	1032
48	3545		48	1046
49	3486		49	1014
50	3625		50	1021
51	3553		51	1033
52	3722		52	1160
53	3858		53	1127
54	3780		54	1138
55	4000		55	1158
56	3948		56	1178
57	3959		57	1179
58	3950		58	1103
59	3909		59	1242
60	3985		60	1167
61	4133		61	1227
62	4102		62	1236
63	4103		63	1194
64	4227		64	1308
65	4257		65	1340
66	4245		66	1243
67	4270		67	1294
68	4389		68	1260
69	4445		69	1331
70	4446		70	1233
71	4385		71	1364
72	4443		72	1274
73	4419		73	1294
74	4391		74	1302
75	4800		75	1418
76	4776		76	1400
77	5022		77	1398
78	5044		78	1417
79	4976		79	1479
80	4969		80	1449
81	5355		81	1566
82	5304		82	1600
83	5399		83	1568
84	5431		84	1537
85	5406		85	1595
86	5527		86	1615
87	5523		87	1603
88	5671		88	1566
89	5696		89	1587
90	5660		90	1679
91	5678		91	1673
92	5788		92	1574
93	5906		93	1664
94	5914		94	1663
95	5981		95	1707
96	5928		96	1700
97	5968		97	1665
98	6098		98	1777
99	6119		99	1709
100	6186		100	1782
101	6290		101	1740
102	6383		102	1784
103	6126		103	1786
104	6262		104	1779
105	6244		105	1839
106	6388		106	1747
107	6438		107	1837
108	6500		108	1818
109	6573		109	1880
110	6581		110	1869
111	6597		111	1846
112	6769		112	1826
113	6630		113	1879
114	6813		114	1876
115	6804		115	1970
116	6917		116	1900
117	6982		117	1950
118	6987		118	1981
119	7034		119	1977
120	7170		120	1992
121	7414		121	2051
122	7322		122	2013
123	7344		123	1951
124	7485		124	1997
125	7309		125	2113
126	7362		126	2041
127	7460		127	2087
128	7551		128	2123
129	7518		129	1974
130	7629		130	2072
131	7546		131	2121
132	7733		132	2199
133	7767		133	2197
134	7755		134	2102
135	7884		135	2150
136	7898		136	2168
137	8001		137	2196
138	7919		138	2223
139	8047		139	2157
140	8019		140	2231
141	8154		141	2266
142	8067		142	2208
143	8246		143	2227
144	8231		144	2166
145	8234		145	2364
146	8345		146	2323
147	8370		147	2309
148	8599		148	2331
149	8559		149	2302
150	8524		150	2351
151	8719		151	2397
152	8724		152	2410
153	8607		153	2326
154	8817		154	2357
155	8740		155	2392
156	8939		156	2405
157	8847		157	2484
158	9080		158	2425
159	9119		159	2356
160	9033		160	2575
161	8935		161	2396
162	9129		162	2408
163	9324		163	2505
164	9217		164	2411
165	9289		165	2465
166	9422		166	2426
167	9559		167	2441
168	9589		168	2536
169	9466		169	2548
170	9564		170	2479
171	9453		171	2518
172	9483		172	2537
173	9692		173	2541
174	9542		174	2563
175	9467		175	2517
176	9631		176	2495
177	9635		177	2486
178	9852		178	2481
179	9742		179	2623
180	9726		180	2519
181	9834		181	2512
182	9808		182	2610
183	9899		183	2585
184	9815		184	2648
185	9850		185	2647
186	10017		186	2575
187	9834		187	2637
188	9968		188	2608
189	9958		189	2637
190	10100		190	2663
191	10166		191	2688
192	10265		192	2724
193	10250		193	2594
194	10327		194	2742
195	10532		195	2677
196	10389		196	2669
197	10344		197	2781
198	10373		198	2734
199	10277		199	2767
200	10356		200	2705
201	10471		201	2680
202	10562		202	2734
203	10551		203	2609
204	10550		204	2729
205	10711		205	2763
206	10745		206	2742
207	10736		207	2861
208	10815		208	2741
209	10785		209	2724
210	10929		210	2783
211	10986		211	2808
212	10992		212	2798
213	11003		213	2866
214	11116		214	2828
215	11205		215	2832
216	11228		216	2772
217	11208		217	2789
218	11282		218	2871
219	11143		219	2808
220	11409		220	2894
221	11360		221	2693
222	11318		222	2856
223	11287		223	2889
224	11316		224	2817
225	11338		225	2829
226	11475		226	2834
227	11435		227	2861
228	11420		228	2879
229	11402		229	2883
230	11508		230	2898
231	11488		231	2892
232	11596		232	2922
233	11505		233	2881
234	11549		234	2955
235	11530		235	2895
236	11628		236	2953
237	11581		237	2908
238	11723		238	2931
239	11691		239	2958
240	11752		240	2909
241	11754		241	2870
242	11812		242	2932
243	11758		243	2872
244	11842		244	2975
245	11736		245	2908
246	11986		246	2937
247	11985		247	2973
248	11864		248	2862
249	11885		249	2936
250	11937		250	2883
251	11982		251	2972
252	12016		252	3041
253	12081		253	3020
254	12180		254	2955
255	12079		255	3074
256	12076		256	3003
257	12305		257	2948
258	12247		258	3039
259	12274		259	2951
260	12315		260	3071
261	12265		261	3073
262	12379		262	2946
263	12380		263	3028
264	12366		264	3020
265	12367		265	3007
266	12437		266	3073
267	12515		267	2954
268	12492		268	2984
269	12364		269	3141
270	12371		270	3090
271	12326		271	3008
272	12485		272	3027
273	12529		273	3044
274	12560		274	2986
275	12508		275	3025
276	12513		276	2976
277	12535		277	3002
278	12540		278	3020
279	12516		279	3042
280	12655		280	3052
281	12628		281	3018
282	12723		282	3109
283	12555		283	2983
284	12766		284	3097
285	12664		285	2963
286	12606		286	3090
287	12786		287	3044
288	12781		288	2991
289	12913		289	3092
290	12924		290	3038
291	12928		291	3109
292	12855		292	3071
293	12854		293	3081
294	13020		294	3093
295	12933		295	3021
296	12929		296	3158
297	13003		297	3037
298	13157		298	3096
299	13084		299	3092
300	13143		300	3149
301	12973		301	3064
302	13170		302	3140
303	13299		303	3091
304	13147		304	3069
305	13192		305	3184
306	13133		306	3205
307	13170		307	3127
308	13164		308	3069
309	13227		309	3068
310	13199		310	3083
311	13253		311	3201
312	13265		312	3158
313	13243		313	3155
314	13209		314	3182
315	13345		315	3091
316	13401		316	3225
317	13381		317	3109
318	13338		318	3121
319	13406		319	3216
320	13378		320	3054
321	13382		321	3134
322	13524		322	3156
323	13471		323	3191
324	13324		324	3106
325	13494		325	3148
326	13533		326	3189
327	13571		327	3098
328	13523		328	3168
329	13568		329	3154
330	13633		330	3226
331	13623		331	3223
332	13714		332	3251
333	13633		333	3040
334	13627		334	3243
335	13711		335	3162
336	13699		336	3215
337	13633		337	3196
338	13767		338	3244
339	13729		339	3209
340	13759		340	3125
341	13712		341	3247
342	13691		342	3144
343	13815		343	3272
344	13836		344	3253
345	13906		345	3183
346	13983		346	3219
347	13894		347	3199
348	13905		348	3204
349	13843		349	3292
350	13896		350	3212
351	13972		351	3201
352	14025		352	3146
353	14166		353	3248
354	14109		354	3240
355	14124		355	3266
356	14169		356	3240
357	14255		357	3272
358	14208		358	3212
359	14251		359	3321
360	14294		360	3212
361	14341		361	3383
362	14320		362	3215
363	14301		363	3221
364	14430		364	3191
365	14460		365	3281
366	14478		366	3234
367	14337		367	3262
368	14391		368	3287
369	14399		369	3264
370	14460		370	3379
371	14336		371	3273
372	14402		372	3243
373	14418		373	3356
374	14607		374	3259
375	14546		375	3291
376	14595		376	3270
377	14581		377	3322
378	14572		378	3289
379	14636		379	3323
380	14760		380	3306
381	14632		381	3230
382	14788		382	3201
383	14663		383	3280
384	14728		384	3317
385	14836		385	3200
386	14734		386	3310
387	14768		387	3180
388	14747		388	3194
389	14767		389	3310
390	14909		390	3315
391	14888		391	3270
392	14788		392	3281
393	14829		393	3302
394	14811		394	3395
395	14856		395	3292
396	14862		396	3267
397	14862		397	3280
398	14917		398	3434
399	14863		399	3314
400	14998		400	3262
401	14880		401	3306
402	14979		402	3330
403	14937		403	3246
404	15026		404	3218
405	15002		405	3286
406	15110		406	3336
407	15022		407	3311
408	15074		408	3255
409	15025		409	3352
410	15108		410	3285
411	15274		411	3263
412	15198		412	3279
413	15264		413	3352
414	15159		414	3302
415	15253		415	3347
416	15289		416	3287
417	15286		417	3376
418	15148		418	3369
419	15277		419	3335
420	15286		420	3330
421	15216		421	3311
422	15414		422	3348
423	15245		423	3271
424	15367		424	3268
425	15350		425	3361
426	15332		426	3234
427	15378		427	3389
428	15356		428	3254
429	15366		429	3366
430	15402		430	3394
431	15388		431	3331
432	15421		432	3358
433	15457		433	3352
434	15503		434	3310
435	15361		435	3283
436	15487		436	3349
437	15534		437	3305
438	15570		438	3237
439	15551		439	3382
440	15504		440	3328
441	15540		441	3293
442	15622		442	3294
443	15562		443	3364
444	15388		444	3284
445	15501		445	3320
446	15656		446	3307
447	15571		447	3393
448	15612		448	3245
449	15736		449	3298
450	15671		450	3316
451	15724		451	3236
452	15672		452	3332
453	15648		453	3399
454	15687		454	3232
455	15652		455	3346
456	15635		456	3279
457	15657		457	3360
458	15638		458	3341
459	15750		459	3210
460	15770		460	3402
461	15747		461	3180
462	15734		462	3245
463	15739		463	3376
464	15787		464	3306
465	15730		465	3304
466	15731		466	3323
467	15766		467	3341
468	15741		468	3298
469	15813		469	3431
470	15752		470	3283
471	15803		471	3377
472	15682		472	3304
473	15809		473	3375
474	15910		474	3252
475	15876		475	3149
476	15887		476	3409
477	15893		477	3330
478	15914		478	3351
479	15828		479	3361
480	16003		480	3468
481	15811		481	3418
482	15899		482	3302
483	15903		483	3400
484	15834		484	3307
485	15924		485	3205
486	15969		486	3196
487	15969		487	3358
488	15925		488	3344
489	15927		489	3253
490	15838		490	3376
491	15930		491	3388
492	16013		492	3396
493	15940		493	3457
494	16034		494	3378
495	15946		495	3375
496	15953		496	3307
497	16007		497	3352
498	16009		498	3346
499	16063		499	3304
500	16035		500	3340
501	16034		501	3335
502	16057		502	3395
503	16114		503	3285
504	16049		504	3272
505	16046		505	3331
506	16103		506	3348
507	16043		507	3466
508	16190		508	3293
509	16126		509	3344
510	16177		510	3248
511	16106		511	3288
512	16212		512	3399
513	16118		513	3296
514	16129		514	3372
515	16208		515	3339
516	16107		516	3337
517	16126		517	3370
518	16220		518	3361
519	16147		519	3333
520	16213		520	3337
521	16291		521	3316
522	16137		522	3272
523	16132		523	3252
524	16206		524	3218
525	16314		525	3344
526	16263		526	3348
527	16313		527	3271
528	16225		528	3242
529	16388		529	3346
530	16307		530	3371
531	16256		531	3307
532	16305		532	3340
533	16351		533	3246
534	16253		534	3275
535	16371		535	3282
536	16380		536	3363
537	16347		537	3339
538	16389		538	3372
539	16362		539	3317
540	16323		540	3285
541	16372		541	3348
542	16413		542	3416
543	16496		543	3229
544	16448		544	3295
545	16545		545	3231
546	16365		546	3296
547	16452		547	3329
548	16550		548	3368
549	16454		549	3261
550	16550		550	3299
551	16514		551	3369
552	16501		552	3319
553	16530		553	3327
554	16453		554	3309
555	16495		555	3391
556	16509		556	3412
557	16506		557	3420
558	16545		558	3186
559	16472		559	3280
560	16536		560	3305
561	16442		561	3408
562	16511		562	3270
563	16575		563	3318
564	16566		564	3182
565	16540		565	3256
566	16626		566	3329
567	16508		567	3328
568	16531		568	3256
569	16534		569	3320
570	16583		570	3301
571	16625		571	3214
572	16626		572	3339
573	16595		573	3264
574	16648		574	3298
575	16654		575	3243
576	16590		576	3328
577	16568		577	3290
578	16587		578	3299
579	16581		579	3294
580	16715		580	3347
581	16519		581	3285
582	16666		582	3208
583	16622		583	3302
584	16667		584	3269
585	16649		585	3334
586	16644		586	3212
587	16706		587	3288
588	16673		588	3238
589	16728		589	3245
590	16680		590	3351
591	16713		591	3317
592	16715		592	3380
593	16685		593	3349
594	16747		594	3305
595	16736		595	3331
596	16662		596	3384
597	16813		597	3334
598	16719		598	3417
599	16721		599	3267
600	16758		600	3347
601	16694		601	3305
602	16760		602	3277
603	16748		603	3368
604	16723		604	3315
605	16752		605	3282
606	16712		606	3391
607	16796		607	3329
608	16771		608	3227
609	16701		609	3211
610	16831		610	3229
611	16852		611	3155
612	16750		612	3254
613	16814		613	3359
614	16810		614	3302
615	16739		615	3253
616	16782		616	3268
617	16760		617	3346
618	16777		618	3323
619	16811		619	3259
620	16815		620	3265
621	16819		621	3396
622	16852		622	3406
623	16847		623	3287
624	16829		624	3372
625	16834		625	3319
626	16809		626	3378
627	16812		627	3315
628	16783		628	3226
629	16875		629	3331
630	16758		630	3386
631	16815		631	3262
632	16822		632	3300
633	16885		633	3235
634	16912		634	3330
635	16812		635	3303
636	16892		636	3301
637	16810		637	3255
638	16930		638	3250
639	16900		639	3220
640	16919		640	3355
641	16885		641	3225
642	16929		642	3345
643	16869		643	3273
644	16919		644	3246
645	16927		645	3391
646	16938		646	3350
647	16937		647	3240
648	16898		648	3283
649	16942		649	3246
650	16901		650	3289
651	16860		651	3299
652	16972		652	3280
653	16978		653	3268
654	16884		654	3289
655	16860		655	3447
656	16876		656	3426
657	16970		657	3316
658	16990		658	3216
659	16983		659	3241
660	17018		660	3313
661	17010		661	3307
662	16995		662	3277
663	16952		663	3375
664	16884		664	3415
665	17032		665	3277
666	17020		666	3325
667	16996		667	3268
668	17028		668	3242
669	16957		669	3315
670	16924		670	3380
671	17013		671	3242
672	16970		672	3467
673	16979		673	3242
674	16959		674	3292
675	17017		675	3321
676	16956		676	3291
677	17028		677	3312
678	16980		678	3225
679	17012		679	3292
680	17045		680	3225
681	17059		681	3366
682	17096		682	3300
683	16958		683	3326
684	16967		684	3300
685	16986		685	3288
686	17058		686	3305
687	17082		687	3269
688	17086		688	3393
689	17064		689	3302
690	17033		690	3342
691	17031		691	3257
692	17091		692	3238
693	17074		693	3233
694	17043		694	3219
695	17058		695	3322
696	17117		696	3308
697	17106		697	3210
698	17144		698	3274
699	17093		699	3305
700	17036		700	3334
701	17032		701	3250
702	17071		702	3180
703	17069		703	3378
704	17142		704	3325
705	17130		705	3207
706	17060		706	3301
707	17043		707	3252
708	17174		708	3217
709	17060		709	3326
710	17068		710	3285
711	17104		711	3353
712	17103		712	3373
713	17108		713	3295
714	17032		714	3374
715	17150		715	3180
716	17100		716	3245
717	17160		717	3342
718	17110		718	3328
719	17081		719	3489
720	17103		720	3288
721	17093		721	3161
722	17141		722	3407
723	17183		723	3344
724	17242		724	3348
725	17175		725	3327
726	17096		726	3214
727	17050		727	3353
728	17166		728	3367
729	17101		729	3201
730	17131		730	3332
731	17275		731	3269
732	17063		732	3320
733	17123		733	3411
734	17121		734	3231
735	17195		735	3313
736	17142		736	3255
737	17125		737	3168
738	17160		738	3289
739	17197		739	3269
740	17142		740	3276
741	17095		741	3257
742	17126		742	3310
743	17125		743	3394
744	17209		744	3313
745	17143		745	3323
746	17188		746	3288
747	17189		747	3261
748	17137		748	3219
749	17208		749	3209
750	17228		750	3257
751	17190		751	3275
752	17242		752	3324
753	17088		753	3325
754	17132		754	3215
755	17182		755	3251
756	17184		756	3228
757	17245		757	3289
758	17133		758	3256
759	17253		759	3279
760	17194		760	3238
761	17220		761	3177
762	17221		762	3232
763	17224		763	3233
764	17202		764	3315
765	17217		765	3305
766	17256		766	3226
767	17210		767	3202
768	17255		768	3264
769	17270		769	3313
770	17293		770	3223
771	17280		771	3280
772	17216		772	3129
773	17216		773	3180
774	17214		774	3214
775	17234		775	3339
776	17288		776	3354
777	17253		777	3236
778	17305		778	3198
779	17311		779	3266
780	17276		780	3334
781	17303		781	3300
782	17274		782	3196
783	17297		783	3181
784	17194		784	3249
785	17299		785	3247
786	17257		786	3246
787	17200		787	3265
788	17287		788	3272
789	17247		789	3361
790	17310		790	3217
791	17248		791	3195
792	17256		792	3261
793	17238		793	3256
794	17271		794	3297
795	17304		795	3228
796	17293		796	3267
797	17323		797	3248
798	17323		798	3263
799	17323		799	3180
800	17323		800	3297
801	17319		801	3257
802	17299		802	3316
803	17279		803	3344
804	17302		804	3313
805	17279		805	3229
806	17340		806	3316
807	17239		807	3160
808	17295		808	3186
809	17266		809	3347
810	17298		810	3106
811	17243		811	3213
812	17242		812	3255
813	17444		813	3282
814	17288		814	3255
815	17347		815	3227
816	17381		816	3142
817	17323		817	3217
818	17411		818	3285
819	17325		819	3231
820	17279		820	3412
821	17283		821	3301
822	17398		822	3270
823	17326		823	3234
824	17377		824	3194
825	17363		825	3294
826	17267		826	3268
827	17405		827	3239
828	17345		828	3269
829	17375		829	3302
830	17335		830	3286
831	17378		831	3291
832	17415		832	3303
833	17423		833	3263
834	17348		834	3282
835	17430		835	3276
836	17358		836	3259
837	17375		837	3280
838	17344		838	3244
839	17306		839	3243
840	17407		840	3301
841	17314		841	3260
842	17425		842	3226
843	17377		843	3288
844	17376		844	3279
845	17361		845	3233
846	17398		846	3188
847	17404		847	3305
848	17372		848	3195
849	17421		849	3240
850	17356		850	3276
851	17374		851	3306
852	17489		852	3278
853	17396		853	3239
854	17344		854	3210
855	17419		855	3205
856	17344		856	3336
857	17377		857	3338
858	17398		858	3330
859	17433		859	3264
860	17398		860	3160
861	17367		861	3239
862	17394		862	3290
863	17486		863	3202
864	17461		864	3422
865	17442		865	3300
866	17339		866	3367
867	17417		867	3234
868	17405		868	3156
869	17424		869	3177
870	17456		870	3253
871	17390		871	3291
872	17404		872	3348
873	17393		873	3330
874	17410		874	3285
875	17486		875	3225
876	17443		876	3304
877	17457		877	3285
878	17372		878	3229
879	17488		879	3247
880	17414		880	3281
881	17380		881	3237
882	17413		882	3222
883	17371		883	3193
884	17460		884	3239
885	17499		885	3181
886	17425		886	3225
887	17454		887	3256
888	17473		888	3228
889	17404		889	3253
890	17471		890	3320
891	17380		891	3245
892	17368		892	3336
893	17468		893	3297
894	17414		894	3164
895	17417		895	3183
896	17462		896	3207
897	17458		897	3340
898	17390		898	3229
899	17373		899	3294
900	17413		900	3254
901	17445		901	3275
902	17409		902	3269
903	17516		903	3239
904	17483		904	3234
905	17405		905	3206
906	17481		906	3329
907	17493		907	3200
908	17518		908	3280
909	17465		909	3254
910	17499		910	3060
911	17434		911	3236
912	17435		912	3137
913	17431		913	3254
914	17422		914	3207
915	17408		915	3254
916	17510		916	3230
917	17506		917	3237
918	17479		918	3383
919	17445		919	3217
920	17400		920	3372
921	17432		921	3271
922	17517		922	3232
923	17474		923	3269
924	17447		924	3221
925	17511		925	3238
926	17490		926	3151
927	17492		927	3268
928	17492		928	3284
929	17438		929	3205
930	17449		930	3326
931	17475		931	3160
932	17488		932	3193
933	17453		933	3228
934	17541		934	3143
935	17564		935	3269
936	17480		936	3190
937	17495		937	3201
938	17484		938	3224
939	17462		939	3249
940	17419		940	3120
941	17398		941	3285
942	17499		942	3087
943	17535		943	3331
944	17484		944	3290
945	17466		945	3278
946	17416		946	3199
947	17486		947	3283
948	17458		948	3206
949	17504		949	3204
950	17491		950	3244
951	17444		951	3262
952	17520		952	3240
953	17517		953	3281
954	17466		954	3285
955	17407		955	3330
956	17466		956	3157
957	17541		957	3282
958	17477		958	3105
959	17476		959	3292
960	17475		960	3247
961	17584		961	3124
962	17436		962	3242
963	17549		963	3246
964	17515		964	3230
965	17474		965	3235
966	17503		966	3080
967	17512		967	3377
968	17480		968	3260
969	17426		969	3197
970	17537		970	3261
971	17497		971	3300
972	17452		972	3327
973	17550		973	3214
974	17541		974	3230
975	17487		975	3225
976	17507		976	3178
977	17525		977	3295
978	17536		978	3254
979	17559		979	3186
980	17539		980	3143
981	17553		981	3257
982	17576		982	3147
983	17501		983	3293
984	17421		984	3243
985	17527		985	3187
986	17508		986	3227
987	17535		987	3194
988	17522		988	3241
989	17519		989	3249
990	17503		990	3251
991	17568		991	3208
992	17456		992	3221
993	17536		993	3215
994	17491		994	3196
995	17500		995	3238
996	17541		996	3259
997	17483		997	3275
998	17562		998	3141
999	17469		999	3164
1000	17545		1000	3196

## Sheet: Fig 1C
Heatmap
		uORF length(codons)
		2	10	20	30	40	50	100
I_uORF	0	0.324868	0.324701	0.324304	0.324128	0.323871	0.323905	0.323167
	0.1	0.322488	0.310721	0.300071	0.292227	0.287015	0.282205	0.263503
	0.2	0.327137	0.30631	0.287713	0.273943	0.263942	0.256198	0.229988
	0.3	0.323108	0.304484	0.278633	0.260022	0.246927	0.236609	0.210877
	0.4	0.323788	0.302797	0.272508	0.249618	0.233585	0.224067	0.214031
	0.5	0.324016	0.302643	0.267924	0.241371	0.225935	0.217906	0.241522
Case plot
Shorter uORF (L=2), CV=0.33			Longer uORF (L=30), CV=0.27
Actions	NEC		Actions	NEC
1	200		1	196
2	292		2	278
3	282		3	316
4	316		4	327
5	394		5	368
6	391		6	400
7	437		7	424
8	479		8	467
9	500		9	518
10	458		10	495
11	502		11	495
12	529		12	540
13	548		13	581
14	603		14	620
15	760		15	729
16	778		16	773
17	825		17	777
18	827		18	857
19	864		19	798
20	886		20	882
21	888		21	880
22	912		22	874
23	1105		23	1028
24	1143		24	1020
25	1115		25	1081
26	1195		26	1163
27	1261		27	1183
28	1261		28	1209
29	1277		29	1262
30	1339		30	1298
31	1392		31	1289
32	1459		32	1385
33	1497		33	1467
34	1465		34	1521
35	1519		35	1520
36	1556		36	1549
37	1591		37	1537
38	1609		38	1481
39	1567		39	1554
40	1680		40	1596
41	1590		41	1678
42	1658		42	1626
43	1796		43	1740
44	1792		44	1774
45	1935		45	1844
46	1876		46	1922
47	1995		47	1868
48	1987		48	1857
49	1986		49	1910
50	2065		50	1984
51	2032		51	2006
52	2099		52	2038
53	2130		53	2101
54	2152		54	2109
55	2220		55	2083
56	2169		56	2166
57	2231		57	2182
58	2313		58	2185
59	2277		59	2201
60	2302		60	2253
61	2410		61	2227
62	2329		62	2272
63	2263		63	2310
64	2376		64	2367
65	2427		65	2230
66	2391		66	2339
67	2402		67	2365
68	2468		68	2301
69	2519		69	2383
70	2466		70	2435
71	2476		71	2498
72	2529		72	2368
73	2556		73	2397
74	2512		74	2441
75	2717		75	2636
76	2860		76	2627
77	2788		77	2647
78	2787		78	2619
79	2825		79	2737
80	2830		80	2682
81	2973		81	2925
82	3080		82	2878
83	3143		83	2970
84	3110		84	2915
85	3144		85	2968
86	3026		86	3007
87	3124		87	2967
88	3219		88	2979
89	3174		89	3024
90	3212		90	3091
91	3279		91	3060
92	3232		92	3183
93	3207		93	3047
94	3277		94	3195
95	3340		95	3140
96	3323		96	3175
97	3347		97	3208
98	3433		98	3323
99	3418		99	3325
100	3476		100	3227
101	3492		101	3284
102	3513		102	3375
103	3463		103	3400
104	3660		104	3336
105	3532		105	3353
106	3496		106	3510
107	3637		107	3378
108	3652		108	3446
109	3749		109	3616
110	3778		110	3495
111	3746		111	3524
112	3678		112	3519
113	3672		113	3505
114	3762		114	3501
115	3765		115	3622
116	3784		116	3573
117	3909		117	3610
118	3948		118	3727
119	3994		119	3875
120	3965		120	3694
121	4110		121	3812
122	4186		122	3802
123	4189		123	3877
124	4031		124	3738
125	4146		125	3972
126	4076		126	3928
127	4147		127	4005
128	4150		128	3991
129	4219		129	3993
130	4175		130	3979
131	4188		131	3980
132	4279		132	4128
133	4301		133	4052
134	4515		134	4066
135	4364		135	4208
136	4261		136	4081
137	4430		137	4124
138	4422		138	4143
139	4452		139	4209
140	4510		140	4020
141	4586		141	4155
142	4590		142	4263
143	4545		143	4286
144	4591		144	4338
145	4653		145	4260
146	4596		146	4343
147	4713		147	4439
148	4902		148	4377
149	4707		149	4428
150	4785		150	4444
151	4944		151	4549
152	4904		152	4647
153	4857		153	4393
154	4962		154	4556
155	5099		155	4533
156	4993		156	4502
157	5048		157	4568
158	5113		158	4591
159	5001		159	4629
160	5019		160	4650
161	4984		161	4691
162	5094		162	4705
163	5146		163	4649
164	5189		164	4775
165	5190		165	4784
166	5238		166	4898
167	5307		167	4871
168	5265		168	4899
169	5245		169	4767
170	5234		170	4764
171	5257		171	4957
172	5378		172	4938
173	5328		173	4905
174	5344		174	4930
175	5185		175	4863
176	5472		176	4838
177	5342		177	4958
178	5452		178	5106
179	5514		179	5031
180	5450		180	4946
181	5604		181	5010
182	5500		182	5044
183	5424		183	4943
184	5543		184	4983
185	5502		185	5017
186	5570		186	5077
187	5554		187	5060
188	5611		188	5123
189	5644		189	5112
190	5706		190	5100
191	5746		191	5151
192	5745		192	5314
193	5713		193	5296
194	5803		194	5262
195	5711		195	5263
196	5794		196	5140
197	5769		197	5185
198	5737		198	5288
199	5797		199	5163
200	5750		200	5156
201	5821		201	5331
202	5848		202	5279
203	5903		203	5170
204	5899		204	5228
205	5947		205	5346
206	5958		206	5293
207	6171		207	5338
208	6149		208	5461
209	6065		209	5268
210	6018		210	5511
211	6055		211	5375
212	6291		212	5533
213	6319		213	5509
214	6152		214	5381
215	6089		215	5500
216	6357		216	5609
217	6208		217	5427
218	6122		218	5614
219	6297		219	5487
220	6298		220	5574
221	6282		221	5569
222	6334		222	5613
223	6387		223	5614
224	6474		224	5486
225	6236		225	5518
226	6344		226	5629
227	6240		227	5654
228	6478		228	5643
229	6306		229	5558
230	6283		230	5660
231	6534		231	5643
232	6488		232	5609
233	6505		233	5712
234	6517		234	5619
235	6442		235	5632
236	6418		236	5621
237	6521		237	5834
238	6520		238	5797
239	6476		239	5649
240	6613		240	5769
241	6544		241	5751
242	6620		242	5705
243	6584		243	5892
244	6608		244	5759
245	6665		245	5715
246	6611		246	5890
247	6733		247	5801
248	6595		248	5867
249	6727		249	5762
250	6746		250	5771
251	6678		251	5893
252	6720		252	5850
253	6785		253	5920
254	6690		254	5884
255	6751		255	5935
256	6833		256	5949
257	6839		257	5856
258	6751		258	5988
259	6887		259	6068
260	6829		260	5944
261	6906		261	6025
262	6833		262	5979
263	6774		263	5895
264	6869		264	6155
265	6837		265	6051
266	7018		266	5808
267	6924		267	5999
268	6886		268	5946
269	6920		269	5968
270	7003		270	6141
271	6934		271	6012
272	6875		272	5978
273	7016		273	5979
274	6924		274	6070
275	6924		275	6116
276	7079		276	6067
277	6993		277	6033
278	6969		278	6042
279	7035		279	6055
280	7169		280	6028
281	7007		281	5893
282	6937		282	6127
283	7024		283	6035
284	7044		284	6036
285	7125		285	6021
286	6994		286	5955
287	7131		287	6207
288	7023		288	6133
289	7210		289	6026
290	7243		290	6162
291	7170		291	6112
292	7231		292	6098
293	7181		293	6231
294	7180		294	6186
295	7273		295	6269
296	7219		296	6157
297	7233		297	6217
298	7308		298	6193
299	7272		299	6252
300	7197		300	6400
301	7298		301	6218
302	7344		302	6233
303	7445		303	6235
304	7301		304	6216
305	7352		305	6299
306	7407		306	6177
307	7385		307	6154
308	7497		308	6328
309	7341		309	6300
310	7329		310	6320
311	7373		311	6282
312	7275		312	6291
313	7327		313	6316
314	7442		314	6298
315	7431		315	6434
316	7303		316	6335
317	7384		317	6284
318	7405		318	6272
319	7534		319	6298
320	7388		320	6422
321	7535		321	6384
322	7544		322	6368
323	7517		323	6448
324	7463		324	6287
325	7508		325	6378
326	7518		326	6400
327	7545		327	6455
328	7535		328	6352
329	7650		329	6263
330	7548		330	6368
331	7593		331	6343
332	7645		332	6284
333	7532		333	6450
334	7580		334	6416
335	7497		335	6495
336	7556		336	6309
337	7590		337	6388
338	7595		338	6483
339	7586		339	6475
340	7614		340	6303
341	7634		341	6509
342	7658		342	6391
343	7713		343	6468
344	7768		344	6399
345	7638		345	6359
346	7766		346	6558
347	7685		347	6409
348	7732		348	6434
349	7648		349	6425
350	7792		350	6576
351	7839		351	6436
352	7852		352	6588
353	7898		353	6510
354	7818		354	6588
355	7820		355	6533
356	7915		356	6629
357	7772		357	6545
358	7928		358	6630
359	7931		359	6590
360	7933		360	6406
361	7851		361	6754
362	8038		362	6670
363	7890		363	6400
364	8090		364	6682
365	7976		365	6541
366	7895		366	6693
367	7981		367	6548
368	7961		368	6673
369	7992		369	6585
370	8009		370	6729
371	8116		371	6672
372	7897		372	6745
373	8063		373	6733
374	8059		374	6608
375	8113		375	6512
376	8046		376	6680
377	7949		377	6640
378	8026		378	6697
379	8256		379	6671
380	8127		380	6761
381	8049		381	6637
382	8108		382	6707
383	8180		383	6560
384	8039		384	6851
385	8164		385	6788
386	8103		386	6722
387	8164		387	6757
388	8096		388	6712
389	8248		389	6600
390	8317		390	6761
391	8223		391	6759
392	8215		392	6786
393	8266		393	6691
394	8182		394	6841
395	8209		395	6749
396	8196		396	6746
397	8207		397	6769
398	8275		398	6836
399	8223		399	6809
400	8310		400	6765
401	8213		401	6803
402	8142		402	6735
403	8168		403	6816
404	8292		404	6811
405	8374		405	6697
406	8310		406	6814
407	8379		407	6682
408	8291		408	6789
409	8375		409	6760
410	8292		410	6729
411	8418		411	6793
412	8331		412	6816
413	8410		413	6806
414	8389		414	6792
415	8492		415	6855
416	8527		416	6727
417	8354		417	6848
418	8386		418	6827
419	8549		419	6861
420	8511		420	6878
421	8393		421	6959
422	8466		422	6695
423	8526		423	6835
424	8538		424	6819
425	8484		425	6778
426	8468		426	6879
427	8499		427	6832
428	8441		428	6799
429	8599		429	6759
430	8589		430	6767
431	8476		431	6877
432	8628		432	6857
433	8494		433	6720
434	8566		434	6835
435	8531		435	6878
436	8498		436	6755
437	8468		437	6883
438	8474		438	6912
439	8566		439	6873
440	8580		440	6720
441	8604		441	6769
442	8657		442	6994
443	8550		443	6830
444	8626		444	6693
445	8488		445	6934
446	8667		446	6954
447	8559		447	6936
448	8627		448	6767
449	8764		449	6950
450	8572		450	6857
451	8736		451	7057
452	8563		452	6991
453	8689		453	6913
454	8651		454	6957
455	8625		455	6958
456	8701		456	6815
457	8668		457	7032
458	8732		458	6923
459	8729		459	6974
460	8639		460	6914
461	8685		461	6925
462	8852		462	7113
463	8679		463	7006
464	8794		464	6971
465	8715		465	6921
466	8663		466	6875
467	8776		467	6925
468	8686		468	6806
469	8750		469	6985
470	8709		470	6884
471	8706		471	6872
472	8675		472	6909
473	8747		473	6851
474	8797		474	7040
475	8814		475	6965
476	8850		476	6953
477	8794		477	6972
478	8874		478	6853
479	8856		479	6884
480	8846		480	7016
481	8821		481	6875
482	8770		482	7042
483	8779		483	6944
484	8850		484	6935
485	8725		485	6947
486	8927		486	6889
487	8689		487	6960
488	8875		488	6989
489	8774		489	7047
490	8781		490	6917
491	8861		491	7043
492	8859		492	6796
493	8890		493	6968
494	8907		494	7018
495	8917		495	6935
496	8787		496	7055
497	8934		497	6913
498	8739		498	7067
499	8994		499	6955
500	8942		500	7036
501	8822		501	6830
502	9068		502	6981
503	8814		503	6917
504	8926		504	6989
505	8817		505	6941
506	8977		506	6888
507	8890		507	6892
508	8932		508	6962
509	8815		509	6917
510	9051		510	6978
511	8994		511	6913
512	8971		512	6973
513	8875		513	6991
514	8994		514	6908
515	9015		515	6812
516	8948		516	7045
517	9060		517	6893
518	9006		518	6977
519	8968		519	6875
520	8996		520	7131
521	8930		521	6921
522	8930		522	6887
523	9116		523	7010
524	8953		524	6965
525	8814		525	7010
526	8989		526	6928
527	8968		527	7043
528	9051		528	7118
529	9040		529	7099
530	9012		530	7021
531	9035		531	7096
532	9171		532	7054
533	9103		533	7006
534	9022		534	7157
535	9132		535	7021
536	8948		536	7055
537	8959		537	6886
538	9074		538	6926
539	9088		539	6987
540	9092		540	6928
541	9094		541	7063
542	9104		542	6992
543	9125		543	7016
544	9253		544	6956
545	9083		545	6939
546	9142		546	6880
547	9119		547	7091
548	9006		548	6979
549	9047		549	7071
550	9168		550	6918
551	9226		551	7027
552	9089		552	6870
553	9078		553	7023
554	9141		554	6982
555	9164		555	6922
556	9085		556	6950
557	9150		557	7172
558	9077		558	6881
559	9212		559	6996
560	9167		560	6866
561	9171		561	7222
562	9213		562	6844
563	9153		563	6983
564	9127		564	6993
565	9120		565	7072
566	9252		566	7028
567	9192		567	6941
568	9179		568	6851
569	9195		569	7166
570	9195		570	6984
571	9173		571	6966
572	9183		572	7108
573	9288		573	7193
574	9100		574	7090
575	9139		575	7130
576	9125		576	7128
577	9239		577	7077
578	9311		578	7095
579	9198		579	7014
580	9122		580	7091
581	9183		581	7093
582	9308		582	7049
583	9295		583	7136
584	9250		584	7056
585	9146		585	7109
586	9181		586	7066
587	9269		587	7014
588	9239		588	7044
589	9152		589	7063
590	9272		590	7059
591	9285		591	7091
592	9335		592	7016
593	9149		593	6976
594	9252		594	6996
595	9248		595	7118
596	9223		596	7043
597	9234		597	7077
598	9138		598	7029
599	9270		599	7033
600	9279		600	7117
601	9242		601	7072
602	9173		602	7084
603	9233		603	7007
604	9245		604	6999
605	9267		605	6980
606	9269		606	7099
607	9277		607	7182
608	9334		608	7085
609	9337		609	7047
610	9260		610	7104
611	9247		611	7051
612	9205		612	7121
613	9134		613	7011
614	9298		614	7009
615	9344		615	7044
616	9242		616	7146
617	9255		617	7058
618	9408		618	6954
619	9269		619	7071
620	9437		620	7113
621	9441		621	7007
622	9411		622	7069
623	9267		623	7009
624	9418		624	7135
625	9428		625	6994
626	9271		626	6978
627	9341		627	7112
628	9349		628	7105
629	9415		629	6960
630	9402		630	6992
631	9297		631	7035
632	9242		632	7075
633	9473		633	7055
634	9309		634	7092
635	9363		635	7138
636	9415		636	7164
637	9378		637	7148
638	9479		638	7080
639	9311		639	7045
640	9305		640	6985
641	9432		641	7221
642	9418		642	7054
643	9452		643	7062
644	9339		644	7102
645	9292		645	7058
646	9228		646	6972
647	9300		647	7145
648	9323		648	7129
649	9359		649	7034
650	9289		650	7006
651	9447		651	7096
652	9447		652	7048
653	9455		653	7165
654	9398		654	7079
655	9388		655	7175
656	9521		656	7183
657	9472		657	7066
658	9461		658	7171
659	9503		659	7098
660	9319		660	7029
661	9357		661	7138
662	9529		662	7021
663	9368		663	7066
664	9534		664	7067
665	9404		665	7048
666	9224		666	7069
667	9472		667	7063
668	9480		668	6953
669	9495		669	7032
670	9438		670	7156
671	9417		671	7047
672	9501		672	7128
673	9392		673	7046
674	9482		674	7191
675	9521		675	6969
676	9452		676	7095
677	9370		677	7100
678	9474		678	7137
679	9572		679	7121
680	9500		680	7010
681	9476		681	6994
682	9480		682	7137
683	9515		683	7114
684	9529		684	7015
685	9545		685	7121
686	9534		686	7090
687	9534		687	7137
688	9410		688	6959
689	9461		689	7067
690	9495		690	7100
691	9498		691	6971
692	9505		692	7105
693	9553		693	7094
694	9402		694	7202
695	9456		695	7080
696	9465		696	7121
697	9576		697	7041
698	9403		698	7030
699	9477		699	7143
700	9509		700	7050
701	9517		701	7145
702	9573		702	7095
703	9594		703	7171
704	9450		704	7006
705	9385		705	7045
706	9566		706	7163
707	9534		707	6981
708	9577		708	6932
709	9529		709	7100
710	9545		710	7135
711	9476		711	7070
712	9510		712	7185
713	9449		713	7125
714	9535		714	7079
715	9507		715	7088
716	9475		716	7142
717	9540		717	7038
718	9533		718	7077
719	9535		719	7081
720	9460		720	7202
721	9429		721	7102
722	9461		722	6989
723	9542		723	7222
724	9639		724	7225
725	9541		725	7083
726	9540		726	7063
727	9601		727	7021
728	9411		728	7226
729	9548		729	7088
730	9460		730	7150
731	9715		731	7241
732	9532		732	6975
733	9525		733	7147
734	9559		734	6959
735	9569		735	7049
736	9543		736	7069
737	9607		737	7204
738	9474		738	7031
739	9618		739	7115
740	9603		740	7089
741	9565		741	7028
742	9698		742	7079
743	9589		743	7205
744	9516		744	7016
745	9549		745	7076
746	9566		746	7129
747	9544		747	6904
748	9605		748	6872
749	9555		749	7076
750	9758		750	7121
751	9634		751	7181
752	9505		752	7167
753	9505		753	7098
754	9617		754	7087
755	9630		755	7047
756	9583		756	7069
757	9534		757	7211
758	9625		758	7090
759	9561		759	6953
760	9688		760	7116
761	9528		761	6991
762	9694		762	7114
763	9537		763	7229
764	9713		764	7097
765	9697		765	7096
766	9588		766	6998
767	9667		767	7151
768	9573		768	7174
769	9531		769	7114
770	9542		770	7259
771	9620		771	7110
772	9588		772	7104
773	9541		773	7224
774	9505		774	7064
775	9584		775	7111
776	9748		776	7254
777	9585		777	6989
778	9537		778	7138
779	9568		779	7081
780	9672		780	6979
781	9621		781	7132
782	9585		782	7155
783	9602		783	6994
784	9637		784	7099
785	9532		785	7206
786	9700		786	7108
787	9645		787	7060
788	9733		788	7093
789	9622		789	7138
790	9732		790	7120
791	9624		791	7136
792	9634		792	7043
793	9784		793	7138
794	9642		794	7111
795	9635		795	7027
796	9624		796	7106
797	9672		797	7205
798	9544		798	6965
799	9584		799	7098
800	9696		800	7121
801	9637		801	7097
802	9599		802	7009
803	9649		803	7106
804	9615		804	7233
805	9663		805	7124
806	9694		806	6984
807	9765		807	7093
808	9716		808	7125
809	9701		809	7054
810	9672		810	7090
811	9606		811	7044
812	9578		812	7044
813	9721		813	7143
814	9664		814	7089
815	9692		815	7092
816	9608		816	7056
817	9645		817	7035
818	9594		818	7051
819	9764		819	7081
820	9663		820	7046
821	9727		821	7235
822	9666		822	7224
823	9624		823	7034
824	9595		824	7100
825	9633		825	7017
826	9523		826	7093
827	9635		827	7098
828	9727		828	7156
829	9820		829	7106
830	9615		830	7146
831	9637		831	7070
832	9670		832	7042
833	9686		833	7054
834	9683		834	7082
835	9741		835	7018
836	9595		836	7135
837	9606		837	7023
838	9749		838	7024
839	9672		839	7257
840	9563		840	7144
841	9760		841	7195
842	9704		842	7143
843	9776		843	7126
844	9721		844	7101
845	9546		845	7019
846	9640		846	7137
847	9543		847	7042
848	9712		848	7109
849	9770		849	7100
850	9665		850	7099
851	9702		851	7048
852	9603		852	7107
853	9691		853	7153
854	9746		854	6963
855	9745		855	7032
856	9730		856	7064
857	9730		857	7095
858	9773		858	7034
859	9630		859	6984
860	9797		860	7137
861	9715		861	7048
862	9662		862	7190
863	9730		863	7040
864	9669		864	7227
865	9782		865	7093
866	9631		866	7076
867	9697		867	7007
868	9805		868	7055
869	9757		869	7151
870	9778		870	7004
871	9671		871	7065
872	9823		872	7110
873	9839		873	6998
874	9688		874	7016
875	9687		875	7024
876	9795		876	7076
877	9807		877	7046
878	9755		878	7131
879	9811		879	7138
880	9957		880	7131
881	9652		881	7016
882	9876		882	7060
883	9634		883	7171
884	9672		884	7024
885	9801		885	6993
886	9761		886	7097
887	9669		887	7141
888	9659		888	7052
889	9829		889	7111
890	9742		890	7089
891	9875		891	7085
892	9840		892	7221
893	9751		893	7253
894	9688		894	7182
895	9667		895	7156
896	9815		896	7100
897	9735		897	7110
898	9792		898	7060
899	9807		899	7039
900	9807		900	7125
901	9651		901	7127
902	9806		902	7149
903	9672		903	7020
904	9779		904	7061
905	9804		905	7182
906	9813		906	7216
907	9841		907	7089
908	9737		908	7073
909	9813		909	7048
910	9835		910	7140
911	9863		911	7127
912	9664		912	7155
913	9793		913	7015
914	9811		914	7115
915	9757		915	7140
916	9795		916	7202
917	9784		917	6982
918	9779		918	7098
919	9706		919	7066
920	9752		920	7024
921	9745		921	7203
922	9812		922	7146
923	9849		923	7197
924	9723		924	7127
925	9845		925	7155
926	9843		926	7086
927	9808		927	7117
928	9774		928	7069
929	9671		929	7084
930	9726		930	7205
931	9783		931	7036
932	9873		932	7082
933	9776		933	7142
934	9727		934	7072
935	9784		935	7070
936	9735		936	7135
937	9860		937	7177
938	9871		938	6966
939	9756		939	7050
940	9839		940	7050
941	9789		941	7167
942	9788		942	7198
943	9859		943	7019
944	9753		944	7118
945	9859		945	7051
946	9771		946	6999
947	9798		947	7075
948	9803		948	7112
949	9713		949	7040
950	9937		950	6921
951	9713		951	7122
952	9906		952	7140
953	9850		953	7057
954	9838		954	7118
955	9830		955	7028
956	9769		956	7137
957	9876		957	7157
958	9818		958	7095
959	9746		959	6997
960	9897		960	7021
961	9765		961	7131
962	9872		962	7082
963	9793		963	7128
964	9820		964	7034
965	9875		965	7066
966	9820		966	7098
967	9923		967	7131
968	9879		968	7060
969	9836		969	7037
970	9853		970	7020
971	9783		971	7100
972	9914		972	7078
973	9774		973	7127
974	9792		974	7111
975	9977		975	7004
976	9798		976	7122
977	9740		977	7236
978	9823		978	7134
979	9800		979	7169
980	9851		980	7203
981	9835		981	7115
982	9864		982	7007
983	9982		983	7177
984	9776		984	7128
985	9849		985	7071
986	9897		986	7054
987	9766		987	7037
988	9982		988	6989
989	9714		989	7182
990	9722		990	7115
991	9822		991	6988
992	9844		992	6959
993	9876		993	7052
994	9768		994	7030
995	9757		995	7176
996	9815		996	7110
997	9909		997	7196
998	9780		998	7121
999	10012		999	7267
1000	9959		1000	7088

## Sheet: Fig 1D
Heatmap
		I_CDS
		0.1	0.2	0.3	0.4	0.5	0.6	0.7	0.8	0.9	1
I_uORF	0.1	-0.0769825	-0.0781836	-0.0694127	-0.0687469	-0.0852086	-0.0752377	-0.0964002	-0.124512	-0.071985	-0.106721
	0.2	-0.109145	-0.120418	-0.110671	-0.121477	-0.118809	-0.104285	-0.113758	-0.122716	-0.114009	-0.11169
	0.3	-0.117386	-0.101826	-0.114225	-0.135559	-0.124437	-0.119019	-0.121583	-0.123641	-0.122931	-0.123461
	0.4	-0.0985575	-0.113796	-0.113815	-0.0833644	-0.10699	-0.11545	-0.105564	-0.107088	-0.0965296	-0.080388
	0.5	-0.089372	-0.102756	-0.0947607	-0.0888243	-0.0984	-0.0829293	-0.0713927	-0.104976	-0.104582	-0.100596
Case_plot
			Median = -0.12
Actions	I_uORF	I_CDS	TE_gamma
1	0.2	0.8	-0.117738
2	0.2	0.8	-0.577049
3	0.2	0.8	-0.415632
4	0.2	0.8	-0.540783
5	0.2	0.8	-0.565468
6	0.2	0.8	-0.659797
7	0.2	0.8	-0.472828
8	0.2	0.8	-0.397973
9	0.2	0.8	-0.315871
10	0.2	0.8	-0.44779
11	0.2	0.8	-0.495265
12	0.2	0.8	-0.413905
13	0.2	0.8	-0.486676
14	0.2	0.8	-0.521286
15	0.2	0.8	-0.351238
16	0.2	0.8	-0.534482
17	0.2	0.8	-0.380164
18	0.2	0.8	-0.374532
19	0.2	0.8	-0.519252
20	0.2	0.8	-0.457144
21	0.2	0.8	-0.452786
22	0.2	0.8	-0.56655
23	0.2	0.8	-0.475725
24	0.2	0.8	-0.486136
25	0.2	0.8	-0.362679
26	0.2	0.8	-0.445112
27	0.2	0.8	-0.504593
28	0.2	0.8	-0.38936
29	0.2	0.8	-0.414521
30	0.2	0.8	-0.358287
31	0.2	0.8	-0.400547
32	0.2	0.8	-0.411221
33	0.2	0.8	-0.432611
34	0.2	0.8	-0.430343
35	0.2	0.8	-0.376632
36	0.2	0.8	-0.463732
37	0.2	0.8	-0.429835
38	0.2	0.8	-0.375294
39	0.2	0.8	-0.426092
40	0.2	0.8	-0.435217
41	0.2	0.8	-0.443884
42	0.2	0.8	-0.444775
43	0.2	0.8	-0.454814
44	0.2	0.8	-0.391674
45	0.2	0.8	-0.438877
46	0.2	0.8	-0.468694
47	0.2	0.8	-0.386858
48	0.2	0.8	-0.437611
49	0.2	0.8	-0.401299
50	0.2	0.8	-0.343418
51	0.2	0.8	-0.367468
52	0.2	0.8	-0.419795
53	0.2	0.8	-0.409573
54	0.2	0.8	-0.379175
55	0.2	0.8	-0.41446
56	0.2	0.8	-0.384446
57	0.2	0.8	-0.398441
58	0.2	0.8	-0.402939
59	0.2	0.8	-0.376809
60	0.2	0.8	-0.447372
61	0.2	0.8	-0.426088
62	0.2	0.8	-0.473194
63	0.2	0.8	-0.295288
64	0.2	0.8	-0.420425
65	0.2	0.8	-0.490944
66	0.2	0.8	-0.344171
67	0.2	0.8	-0.396988
68	0.2	0.8	-0.428225
69	0.2	0.8	-0.364247
70	0.2	0.8	-0.333704
71	0.2	0.8	-0.353865
72	0.2	0.8	-0.437094
73	0.2	0.8	-0.374509
74	0.2	0.8	-0.358945
75	0.2	0.8	-0.346358
76	0.2	0.8	-0.378812
77	0.2	0.8	-0.391457
78	0.2	0.8	-0.417786
79	0.2	0.8	-0.333588
80	0.2	0.8	-0.387428
81	0.2	0.8	-0.349117
82	0.2	0.8	-0.406978
83	0.2	0.8	-0.345802
84	0.2	0.8	-0.374042
85	0.2	0.8	-0.358581
86	0.2	0.8	-0.364277
87	0.2	0.8	-0.458367
88	0.2	0.8	-0.304005
89	0.2	0.8	-0.401603
90	0.2	0.8	-0.417567
91	0.2	0.8	-0.338332
92	0.2	0.8	-0.380693
93	0.2	0.8	-0.343074
94	0.2	0.8	-0.35383
95	0.2	0.8	-0.352403
96	0.2	0.8	-0.339455
97	0.2	0.8	-0.359564
98	0.2	0.8	-0.389543
99	0.2	0.8	-0.435823
100	0.2	0.8	-0.384808
101	0.2	0.8	-0.382982
102	0.2	0.8	-0.330027
103	0.2	0.8	-0.361872
104	0.2	0.8	-0.410021
105	0.2	0.8	-0.31743
106	0.2	0.8	-0.361629
107	0.2	0.8	-0.336368
108	0.2	0.8	-0.361629
109	0.2	0.8	-0.359274
110	0.2	0.8	-0.351922
111	0.2	0.8	-0.335032
112	0.2	0.8	-0.328758
113	0.2	0.8	-0.361488
114	0.2	0.8	-0.357686
115	0.2	0.8	-0.346996
116	0.2	0.8	-0.366654
117	0.2	0.8	-0.381305
118	0.2	0.8	-0.334318
119	0.2	0.8	-0.407192
120	0.2	0.8	-0.329538
121	0.2	0.8	-0.301736
122	0.2	0.8	-0.368947
123	0.2	0.8	-0.330313
124	0.2	0.8	-0.344933
125	0.2	0.8	-0.338059
126	0.2	0.8	-0.309957
127	0.2	0.8	-0.350148
128	0.2	0.8	-0.321086
129	0.2	0.8	-0.329319
130	0.2	0.8	-0.348124
131	0.2	0.8	-0.348319
132	0.2	0.8	-0.357602
133	0.2	0.8	-0.312291
134	0.2	0.8	-0.313463
135	0.2	0.8	-0.320526
136	0.2	0.8	-0.323925
137	0.2	0.8	-0.341069
138	0.2	0.8	-0.299704
139	0.2	0.8	-0.316078
140	0.2	0.8	-0.346361
141	0.2	0.8	-0.299701
142	0.2	0.8	-0.320109
143	0.2	0.8	-0.339319
144	0.2	0.8	-0.303182
145	0.2	0.8	-0.329845
146	0.2	0.8	-0.295589
147	0.2	0.8	-0.306116
148	0.2	0.8	-0.292202
149	0.2	0.8	-0.286578
150	0.2	0.8	-0.314288
151	0.2	0.8	-0.303377
152	0.2	0.8	-0.255739
153	0.2	0.8	-0.275783
154	0.2	0.8	-0.267607
155	0.2	0.8	-0.25351
156	0.2	0.8	-0.277063
157	0.2	0.8	-0.313982
158	0.2	0.8	-0.3259
159	0.2	0.8	-0.306089
160	0.2	0.8	-0.35731
161	0.2	0.8	-0.327124
162	0.2	0.8	-0.313518
163	0.2	0.8	-0.251977
164	0.2	0.8	-0.256482
165	0.2	0.8	-0.249521
166	0.2	0.8	-0.251866
167	0.2	0.8	-0.316345
168	0.2	0.8	-0.274819
169	0.2	0.8	-0.272721
170	0.2	0.8	-0.297474
171	0.2	0.8	-0.271283
172	0.2	0.8	-0.247787
173	0.2	0.8	-0.214175
174	0.2	0.8	-0.240814
175	0.2	0.8	-0.306808
176	0.2	0.8	-0.230048
177	0.2	0.8	-0.244701
178	0.2	0.8	-0.23844
179	0.2	0.8	-0.251019
180	0.2	0.8	-0.236155
181	0.2	0.8	-0.304166
182	0.2	0.8	-0.26639
183	0.2	0.8	-0.223949
184	0.2	0.8	-0.295221
185	0.2	0.8	-0.313835
186	0.2	0.8	-0.308208
187	0.2	0.8	-0.245283
188	0.2	0.8	-0.289231
189	0.2	0.8	-0.25593
190	0.2	0.8	-0.248883
191	0.2	0.8	-0.27291
192	0.2	0.8	-0.295663
193	0.2	0.8	-0.159749
194	0.2	0.8	-0.252684
195	0.2	0.8	-0.297099
196	0.2	0.8	-0.246621
197	0.2	0.8	-0.274348
198	0.2	0.8	-0.24083
199	0.2	0.8	-0.277336
200	0.2	0.8	-0.226546
201	0.2	0.8	-0.248393
202	0.2	0.8	-0.229228
203	0.2	0.8	-0.203925
204	0.2	0.8	-0.272435
205	0.2	0.8	-0.218984
206	0.2	0.8	-0.278211
207	0.2	0.8	-0.248135
208	0.2	0.8	-0.250933
209	0.2	0.8	-0.167389
210	0.2	0.8	-0.229869
211	0.2	0.8	-0.267825
212	0.2	0.8	-0.263478
213	0.2	0.8	-0.202988
214	0.2	0.8	-0.206184
215	0.2	0.8	-0.211062
216	0.2	0.8	-0.225263
217	0.2	0.8	-0.186067
218	0.2	0.8	-0.227796
219	0.2	0.8	-0.238405
220	0.2	0.8	-0.254417
221	0.2	0.8	-0.234695
222	0.2	0.8	-0.204039
223	0.2	0.8	-0.233299
224	0.2	0.8	-0.214024
225	0.2	0.8	-0.220811
226	0.2	0.8	-0.238928
227	0.2	0.8	-0.222182
228	0.2	0.8	-0.231918
229	0.2	0.8	-0.259079
230	0.2	0.8	-0.146819
231	0.2	0.8	-0.177121
232	0.2	0.8	-0.167275
233	0.2	0.8	-0.263809
234	0.2	0.8	-0.174283
235	0.2	0.8	-0.240822
236	0.2	0.8	-0.208761
237	0.2	0.8	-0.185429
238	0.2	0.8	-0.252377
239	0.2	0.8	-0.173551
240	0.2	0.8	-0.235664
241	0.2	0.8	-0.197648
242	0.2	0.8	-0.162156
243	0.2	0.8	-0.206768
244	0.2	0.8	-0.187608
245	0.2	0.8	-0.16951
246	0.2	0.8	-0.185421
247	0.2	0.8	-0.235547
248	0.2	0.8	-0.144488
249	0.2	0.8	-0.234235
250	0.2	0.8	-0.201896
251	0.2	0.8	-0.188694
252	0.2	0.8	-0.194877
253	0.2	0.8	-0.209555
254	0.2	0.8	-0.202552
255	0.2	0.8	-0.192211
256	0.2	0.8	-0.124628
257	0.2	0.8	-0.193672
258	0.2	0.8	-0.169888
259	0.2	0.8	-0.208172
260	0.2	0.8	-0.228909
261	0.2	0.8	-0.157798
262	0.2	0.8	-0.227958
263	0.2	0.8	-0.204336
264	0.2	0.8	-0.184485
265	0.2	0.8	-0.139028
266	0.2	0.8	-0.153161
267	0.2	0.8	-0.172485
268	0.2	0.8	-0.233141
269	0.2	0.8	-0.190038
270	0.2	0.8	-0.135828
271	0.2	0.8	-0.185417
272	0.2	0.8	-0.194087
273	0.2	0.8	-0.217725
274	0.2	0.8	-0.201103
275	0.2	0.8	-0.107914
276	0.2	0.8	-0.220419
277	0.2	0.8	-0.211116
278	0.2	0.8	-0.197332
279	0.2	0.8	-0.161593
280	0.2	0.8	-0.192925
281	0.2	0.8	-0.195328
282	0.2	0.8	-0.181266
283	0.2	0.8	-0.236445
284	0.2	0.8	-0.157837
285	0.2	0.8	-0.122649
286	0.2	0.8	-0.105982
287	0.2	0.8	-0.133723
288	0.2	0.8	-0.139353
289	0.2	0.8	-0.17325
290	0.2	0.8	-0.145283
291	0.2	0.8	-0.20021
292	0.2	0.8	-0.159507
293	0.2	0.8	-0.173287
294	0.2	0.8	-0.128435
295	0.2	0.8	-0.180451
296	0.2	0.8	-0.148149
297	0.2	0.8	-0.159766
298	0.2	0.8	-0.136466
299	0.2	0.8	-0.136709
300	0.2	0.8	-0.122887
301	0.2	0.8	-0.173654
302	0.2	0.8	-0.110528
303	0.2	0.8	-0.0946145
304	0.2	0.8	-0.150851
305	0.2	0.8	-0.129766
306	0.2	0.8	-0.143691
307	0.2	0.8	-0.193272
308	0.2	0.8	-0.181068
309	0.2	0.8	-0.156786
310	0.2	0.8	-0.111559
311	0.2	0.8	-0.140391
312	0.2	0.8	-0.188444
313	0.2	0.8	-0.111283
314	0.2	0.8	-0.106398
315	0.2	0.8	-0.126938
316	0.2	0.8	-0.115576
317	0.2	0.8	-0.158049
318	0.2	0.8	-0.170283
319	0.2	0.8	-0.140281
320	0.2	0.8	-0.103188
321	0.2	0.8	-0.152024
322	0.2	0.8	-0.176904
323	0.2	0.8	-0.0973448
324	0.2	0.8	-0.156506
325	0.2	0.8	-0.105299
326	0.2	0.8	-0.125326
327	0.2	0.8	-0.154544
328	0.2	0.8	-0.137544
329	0.2	0.8	-0.144868
330	0.2	0.8	-0.146569
331	0.2	0.8	-0.181876
332	0.2	0.8	-0.126071
333	0.2	0.8	-0.114315
334	0.2	0.8	-0.141643
335	0.2	0.8	-0.120307
336	0.2	0.8	-0.0984748
337	0.2	0.8	-0.135646
338	0.2	0.8	-0.0929725
339	0.2	0.8	-0.124965
340	0.2	0.8	-0.0909263
341	0.2	0.8	-0.140599
342	0.2	0.8	-0.130845
343	0.2	0.8	-0.111091
344	0.2	0.8	-0.0960531
345	0.2	0.8	-0.111644
346	0.2	0.8	-0.0995975
347	0.2	0.8	-0.123548
348	0.2	0.8	-0.115032
349	0.2	0.8	-0.170166
350	0.2	0.8	-0.102357
351	0.2	0.8	-0.0942943
352	0.2	0.8	-0.124824
353	0.2	0.8	-0.143418
354	0.2	0.8	-0.0974907
355	0.2	0.8	-0.0959256
356	0.2	0.8	-0.123804
357	0.2	0.8	-0.0733828
358	0.2	0.8	-0.0736909
359	0.2	0.8	-0.0900652
360	0.2	0.8	-0.10257
361	0.2	0.8	-0.0853852
362	0.2	0.8	-0.12556
363	0.2	0.8	-0.091515
364	0.2	0.8	-0.108195
365	0.2	0.8	-0.0544121
366	0.2	0.8	-0.0950591
367	0.2	0.8	-0.146897
368	0.2	0.8	-0.0824385
369	0.2	0.8	-0.077571
370	0.2	0.8	-0.106055
371	0.2	0.8	-0.0443477
372	0.2	0.8	-0.114434
373	0.2	0.8	-0.0982864
374	0.2	0.8	-0.0894288
375	0.2	0.8	-0.104306
376	0.2	0.8	-0.081101
377	0.2	0.8	-0.110758
378	0.2	0.8	-0.0268095
379	0.2	0.8	-0.101394
380	0.2	0.8	-0.100844
381	0.2	0.8	-0.0854904
382	0.2	0.8	-0.0356249
383	0.2	0.8	-0.0739177
384	0.2	0.8	-0.0178331
385	0.2	0.8	-0.106143
386	0.2	0.8	-0.0681109
387	0.2	0.8	-0.0788057
388	0.2	0.8	-0.12088
389	0.2	0.8	-0.0941822
390	0.2	0.8	-0.0291175
391	0.2	0.8	-0.10796
392	0.2	0.8	-0.066189
393	0.2	0.8	-0.0801629
394	0.2	0.8	-0.0447156
395	0.2	0.8	-0.0453062
396	0.2	0.8	-0.041437
397	0.2	0.8	-0.0540992
398	0.2	0.8	-0.0694326
399	0.2	0.8	-0.0802225
400	0.2	0.8	-0.134712
401	0.2	0.8	-0.0991642
402	0.2	0.8	-0.0472798
403	0.2	0.8	-0.0369466
404	0.2	0.8	-0.116362
405	0.2	0.8	-0.0243452
406	0.2	0.8	-0.0912236
407	0.2	0.8	-0.00920631
408	0.2	0.8	-0.0850914
409	0.2	0.8	-0.0454887
410	0.2	0.8	-0.0560584
411	0.2	0.8	-0.0370114
412	0.2	0.8	-0.0755861
413	0.2	0.8	-0.0249849
414	0.2	0.8	-0.0508802
415	0.2	0.8	0.024762
416	0.2	0.8	-0.0473472
417	0.2	0.8	-0.0473218
418	0.2	0.8	-0.00297739
419	0.2	0.8	-0.071299
420	0.2	0.8	-0.0163894
421	0.2	0.8	0.00314548
422	0.2	0.8	-0.00278304
423	0.2	0.8	-0.0297756
424	0.2	0.8	-0.0439213
425	0.2	0.8	-0.0335471
426	0.2	0.8	-0.0366404
427	0.2	0.8	-0.0187565
428	0.2	0.8	-0.0293094
429	0.2	0.8	-0.064707
430	0.2	0.8	-0.0142903
431	0.2	0.8	-0.0685082
432	0.2	0.8	-0.0403799
433	0.2	0.8	-0.0388873
434	0.2	0.8	-0.0233684
435	0.2	0.8	-0.02604
436	0.2	0.8	-0.0344238
437	0.2	0.8	0.0195927
438	0.2	0.8	0.00537293
439	0.2	0.8	-0.0447847
440	0.2	0.8	-0.0309383
441	0.2	0.8	-0.0417756
442	0.2	0.8	-0.0320817
443	0.2	0.8	-0.0162726
444	0.2	0.8	-0.0323663
445	0.2	0.8	-0.000955127
446	0.2	0.8	0.00362419
447	0.2	0.8	-0.0170178
448	0.2	0.8	-0.0209521
449	0.2	0.8	-0.0317208
450	0.2	0.8	-0.00581015
451	0.2	0.8	-0.00781269
452	0.2	0.8	0.0390633
453	0.2	0.8	-0.0340073
454	0.2	0.8	-0.0564578
455	0.2	0.8	-0.0381249
456	0.2	0.8	-0.0266986
457	0.2	0.8	-0.0417041
458	0.2	0.8	-0.0378289
459	0.2	0.8	-0.0345873
460	0.2	0.8	-0.0212119
461	0.2	0.8	-0.0360578
462	0.2	0.8	-0.0389218
463	0.2	0.8	-0.0235883
464	0.2	0.8	0.0446704
465	0.2	0.8	0.0469555
466	0.2	0.8	-0.013631
467	0.2	0.8	-0.0193649
468	0.2	0.8	0.00204307
469	0.2	0.8	0.00568728
470	0.2	0.8	-0.000441044
471	0.2	0.8	-0.0166513
472	0.2	0.8	0.0043336
473	0.2	0.8	-0.0113744
474	0.2	0.8	-0.00472267
475	0.2	0.8	0.0221384
476	0.2	0.8	0.00424924
477	0.2	0.8	0.00803321
478	0.2	0.8	-0.0118531
479	0.2	0.8	-0.0113646
480	0.2	0.8	-0.00875792
481	0.2	0.8	-0.0178335
482	0.2	0.8	-0.00244756
483	0.2	0.8	-0.00201069
484	0.2	0.8	-0.0173153
485	0.2	0.8	-0.00867713
486	0.2	0.8	0.00741902
487	0.2	0.8	-0.00698727
488	0.2	0.8	0.000129895
489	0.2	0.8	0.00448804
490	0.2	0.8	0.00235178
491	0.2	0.8	-0.00721436
492	0.2	0.8	0.00943822
493	0.2	0.8	0.00408834
494	0.2	0.8	0.00816419
495	0.2	0.8	0.0010114
496	0.2	0.8	0.000139713
497	0.2	0.8	-0.00081892
498	0.2	0.8	-0.00643262
499	0.2	0.8	-0.00183619
500	0.2	0.8	0.00530328
501	0.2	0.8	0
502	0.2	0.8	0.00431747
503	0.2	0.8	0.00628368
504	0.2	0.8	0.00173347
505	0.2	0.8	-0.00689109
506	0.2	0.8	0.0100128
507	0.2	0.8	0.0188877
508	0.2	0.8	0.00393336
509	0.2	0.8	0.0123215
510	0.2	0.8	0.0169593
511	0.2	0.8	-0.0287461
512	0.2	0.8	0.00457829
513	0.2	0.8	0.00954703
514	0.2	0.8	0.0231398
515	0.2	0.8	0.0149763
516	0.2	0.8	-0.00284942
517	0.2	0.8	0.00738717
518	0.2	0.8	0.0220959
519	0.2	0.8	0.0197576
520	0.2	0.8	-0.0217222
521	0.2	0.8	-0.000321471
522	0.2	0.8	0.00270341
523	0.2	0.8	-0.0180043
524	0.2	0.8	-0.0163224
525	0.2	0.8	-0.0205507
526	0.2	0.8	-0.0284897
527	0.2	0.8	-0.0208709
528	0.2	0.8	-0.0283674
529	0.2	0.8	0.0335233
530	0.2	0.8	0.0276418
531	0.2	0.8	0.00862752
532	0.2	0.8	-0.0446206
533	0.2	0.8	-0.0159892
534	0.2	0.8	-0.036642
535	0.2	0.8	-0.0336548
536	0.2	0.8	-0.0108568
537	0.2	0.8	-0.0397815
538	0.2	0.8	-0.0384965
539	0.2	0.8	0.00455125
540	0.2	0.8	0.00672297
541	0.2	0.8	-0.0104164
542	0.2	0.8	-0.0349273
543	0.2	0.8	-0.0582229
544	0.2	0.8	-0.0188069
545	0.2	0.8	-0.0481342
546	0.2	0.8	0.012474
547	0.2	0.8	-0.0301498
548	0.2	0.8	-0.0345682
549	0.2	0.8	0.00978129
550	0.2	0.8	-0.0352063
551	0.2	0.8	-0.00353123
552	0.2	0.8	-0.0256908
553	0.2	0.8	-0.0586474
554	0.2	0.8	-0.063962
555	0.2	0.8	-0.0632616
556	0.2	0.8	-0.0563044
557	0.2	0.8	-0.0446355
558	0.2	0.8	-0.0524925
559	0.2	0.8	-0.0351619
560	0.2	0.8	-0.0722525
561	0.2	0.8	-0.0514777
562	0.2	0.8	-0.0317029
563	0.2	0.8	-0.0785883
564	0.2	0.8	-0.0681047
565	0.2	0.8	-0.0505419
566	0.2	0.8	-0.0384502
567	0.2	0.8	-0.0688597
568	0.2	0.8	-0.0450423
569	0.2	0.8	-0.0446549
570	0.2	0.8	-0.0412776
571	0.2	0.8	-0.00994263
572	0.2	0.8	-0.0188641
573	0.2	0.8	-0.0599922
574	0.2	0.8	-0.0521333
575	0.2	0.8	-0.0181633
576	0.2	0.8	-0.0382517
577	0.2	0.8	-0.0704353
578	0.2	0.8	-0.0658502
579	0.2	0.8	-0.0614632
580	0.2	0.8	-0.056126
581	0.2	0.8	-0.0504827
582	0.2	0.8	-0.0499119
583	0.2	0.8	-0.0287883
584	0.2	0.8	-0.0483513
585	0.2	0.8	-0.00368482
586	0.2	0.8	-0.0139053
587	0.2	0.8	-0.0465473
588	0.2	0.8	-0.075666
589	0.2	0.8	-0.0687349
590	0.2	0.8	-0.0707497
591	0.2	0.8	0.0187498
592	0.2	0.8	-0.0464439
593	0.2	0.8	-0.0573996
594	0.2	0.8	-0.0225414
595	0.2	0.8	-0.04823
596	0.2	0.8	-0.0558505
597	0.2	0.8	-0.0891675
598	0.2	0.8	-0.0490786
599	0.2	0.8	-0.0692178
600	0.2	0.8	-0.0729855
601	0.2	0.8	-0.056209
602	0.2	0.8	-0.0445136
603	0.2	0.8	-0.0231294
604	0.2	0.8	-0.0346968
605	0.2	0.8	-0.0546888
606	0.2	0.8	-0.0928496
607	0.2	0.8	-0.049137
608	0.2	0.8	-0.065467
609	0.2	0.8	-0.0299842
610	0.2	0.8	-0.0758129
611	0.2	0.8	-0.088019
612	0.2	0.8	-0.0783926
613	0.2	0.8	-0.0750385
614	0.2	0.8	-0.0593004
615	0.2	0.8	-0.0490149
616	0.2	0.8	-0.0735387
617	0.2	0.8	-0.0670588
618	0.2	0.8	-0.0706755
619	0.2	0.8	-0.0683603
620	0.2	0.8	-0.0427402
621	0.2	0.8	-0.0446096
622	0.2	0.8	-0.0600981
623	0.2	0.8	-0.0588168
624	0.2	0.8	-0.087893
625	0.2	0.8	-0.0811355
626	0.2	0.8	-0.0026399
627	0.2	0.8	-0.0809564
628	0.2	0.8	-0.0107485
629	0.2	0.8	-0.0810705
630	0.2	0.8	-0.0788063
631	0.2	0.8	-0.106834
632	0.2	0.8	-0.0696634
633	0.2	0.8	-0.0887919
634	0.2	0.8	-0.0889897
635	0.2	0.8	-0.0540267
636	0.2	0.8	-0.0947703
637	0.2	0.8	-0.0158129
638	0.2	0.8	-0.0831074
639	0.2	0.8	-0.0879166
640	0.2	0.8	-0.084749
641	0.2	0.8	-0.0991311
642	0.2	0.8	-0.0850011
643	0.2	0.8	-0.0971764
644	0.2	0.8	-0.0773995
645	0.2	0.8	-0.112313
646	0.2	0.8	-0.0951963
647	0.2	0.8	-0.0912891
648	0.2	0.8	-0.0707962
649	0.2	0.8	-0.0468894
650	0.2	0.8	-0.125296
651	0.2	0.8	-0.116552
652	0.2	0.8	-0.0307565
653	0.2	0.8	-0.0374993
654	0.2	0.8	-0.0536547
655	0.2	0.8	-0.0436673
656	0.2	0.8	-0.0891791
657	0.2	0.8	-0.108081
658	0.2	0.8	-0.0881773
659	0.2	0.8	-0.102655
660	0.2	0.8	-0.0911301
661	0.2	0.8	-0.0525457
662	0.2	0.8	-0.119169
663	0.2	0.8	-0.0376902
664	0.2	0.8	-0.076491
665	0.2	0.8	-0.084895
666	0.2	0.8	-0.0873905
667	0.2	0.8	-0.052071
668	0.2	0.8	-0.0671848
669	0.2	0.8	-0.0710474
670	0.2	0.8	-0.0675833
671	0.2	0.8	-0.100948
672	0.2	0.8	-0.10546
673	0.2	0.8	-0.0637802
674	0.2	0.8	-0.127164
675	0.2	0.8	-0.0670573
676	0.2	0.8	-0.0966009
677	0.2	0.8	-0.118697
678	0.2	0.8	-0.0810509
679	0.2	0.8	-0.123765
680	0.2	0.8	-0.0529222
681	0.2	0.8	-0.098956
682	0.2	0.8	-0.067883
683	0.2	0.8	-0.0629685
684	0.2	0.8	-0.123343
685	0.2	0.8	-0.112909
686	0.2	0.8	-0.0718579
687	0.2	0.8	-0.116495
688	0.2	0.8	-0.0992412
689	0.2	0.8	-0.0823295
690	0.2	0.8	-0.0918539
691	0.2	0.8	-0.106708
692	0.2	0.8	-0.0954999
693	0.2	0.8	-0.0690043
694	0.2	0.8	-0.0980342
695	0.2	0.8	-0.0901303
696	0.2	0.8	-0.109193
697	0.2	0.8	-0.0932767
698	0.2	0.8	-0.0766417
699	0.2	0.8	-0.105542
700	0.2	0.8	-0.0559542
701	0.2	0.8	-0.0487714
702	0.2	0.8	-0.0725287
703	0.2	0.8	-0.0760203
704	0.2	0.8	-0.0867783
705	0.2	0.8	-0.103265
706	0.2	0.8	-0.069016
707	0.2	0.8	-0.137712
708	0.2	0.8	-0.0914127
709	0.2	0.8	-0.0600162
710	0.2	0.8	-0.0597292
711	0.2	0.8	-0.0592592
712	0.2	0.8	-0.0909296
713	0.2	0.8	-0.0778404
714	0.2	0.8	-0.0836469
715	0.2	0.8	-0.0923894
716	0.2	0.8	-0.0794406
717	0.2	0.8	-0.086044
718	0.2	0.8	-0.0681055
719	0.2	0.8	-0.0688835
720	0.2	0.8	-0.0621353
721	0.2	0.8	-0.114894
722	0.2	0.8	-0.085716
723	0.2	0.8	-0.115586
724	0.2	0.8	-0.0582478
725	0.2	0.8	-0.0626249
726	0.2	0.8	-0.0858398
727	0.2	0.8	-0.130171
728	0.2	0.8	-0.0907846
729	0.2	0.8	-0.0810553
730	0.2	0.8	-0.0887616
731	0.2	0.8	-0.106146
732	0.2	0.8	-0.112663
733	0.2	0.8	-0.0988014
734	0.2	0.8	-0.0989478
735	0.2	0.8	-0.109841
736	0.2	0.8	-0.116538
737	0.2	0.8	-0.13506
738	0.2	0.8	-0.0629011
739	0.2	0.8	-0.107806
740	0.2	0.8	-0.04191
741	0.2	0.8	-0.0679859
742	0.2	0.8	-0.0933241
743	0.2	0.8	-0.143567
744	0.2	0.8	-0.0909906
745	0.2	0.8	-0.0682151
746	0.2	0.8	-0.114792
747	0.2	0.8	-0.103148
748	0.2	0.8	-0.116595
749	0.2	0.8	-0.130031
750	0.2	0.8	-0.114793
751	0.2	0.8	-0.110654
752	0.2	0.8	-0.101014
753	0.2	0.8	-0.0727371
754	0.2	0.8	-0.117288
755	0.2	0.8	-0.0949844
756	0.2	0.8	-0.119563
757	0.2	0.8	-0.0934847
758	0.2	0.8	-0.0842852
759	0.2	0.8	-0.113007
760	0.2	0.8	-0.0876289
761	0.2	0.8	-0.129474
762	0.2	0.8	-0.0922733
763	0.2	0.8	-0.13855
764	0.2	0.8	-0.144603
765	0.2	0.8	-0.10065
766	0.2	0.8	-0.108111
767	0.2	0.8	-0.123204
768	0.2	0.8	-0.0978621
769	0.2	0.8	-0.116804
770	0.2	0.8	-0.151897
771	0.2	0.8	-0.0879852
772	0.2	0.8	-0.0830448
773	0.2	0.8	-0.0815704
774	0.2	0.8	-0.127907
775	0.2	0.8	-0.141717
776	0.2	0.8	-0.123474
777	0.2	0.8	-0.105111
778	0.2	0.8	-0.0588189
779	0.2	0.8	-0.159363
780	0.2	0.8	-0.10046
781	0.2	0.8	-0.131407
782	0.2	0.8	-0.126403
783	0.2	0.8	-0.161011
784	0.2	0.8	-0.0645174
785	0.2	0.8	-0.105593
786	0.2	0.8	-0.090006
787	0.2	0.8	-0.119566
788	0.2	0.8	-0.122784
789	0.2	0.8	-0.15542
790	0.2	0.8	-0.105968
791	0.2	0.8	-0.135003
792	0.2	0.8	-0.108339
793	0.2	0.8	-0.0722271
794	0.2	0.8	-0.118064
795	0.2	0.8	-0.136884
796	0.2	0.8	-0.115693
797	0.2	0.8	-0.109477
798	0.2	0.8	-0.144836
799	0.2	0.8	-0.107002
800	0.2	0.8	-0.139753
801	0.2	0.8	-0.0941163
802	0.2	0.8	-0.103202
803	0.2	0.8	-0.0975666
804	0.2	0.8	-0.132272
805	0.2	0.8	-0.101219
806	0.2	0.8	-0.120877
807	0.2	0.8	-0.122323
808	0.2	0.8	-0.156616
809	0.2	0.8	-0.0732667
810	0.2	0.8	-0.165373
811	0.2	0.8	-0.144444
812	0.2	0.8	-0.106799
813	0.2	0.8	-0.105339
814	0.2	0.8	-0.146379
815	0.2	0.8	-0.0960553
816	0.2	0.8	-0.123598
817	0.2	0.8	-0.136708
818	0.2	0.8	-0.088204
819	0.2	0.8	-0.0941043
820	0.2	0.8	-0.121659
821	0.2	0.8	-0.11237
822	0.2	0.8	-0.101257
823	0.2	0.8	-0.130715
824	0.2	0.8	-0.14554
825	0.2	0.8	-0.110096
826	0.2	0.8	-0.131798
827	0.2	0.8	-0.0890031
828	0.2	0.8	-0.133599
829	0.2	0.8	-0.130879
830	0.2	0.8	-0.125348
831	0.2	0.8	-0.11564
832	0.2	0.8	-0.125128
833	0.2	0.8	-0.150125
834	0.2	0.8	-0.132646
835	0.2	0.8	-0.0978594
836	0.2	0.8	-0.132178
837	0.2	0.8	-0.0991829
838	0.2	0.8	-0.14477
839	0.2	0.8	-0.106331
840	0.2	0.8	-0.0718432
841	0.2	0.8	-0.129945
842	0.2	0.8	-0.163459
843	0.2	0.8	-0.114483
844	0.2	0.8	-0.163172
845	0.2	0.8	-0.116324
846	0.2	0.8	-0.131638
847	0.2	0.8	-0.0966757
848	0.2	0.8	-0.0970023
849	0.2	0.8	-0.144337
850	0.2	0.8	-0.151374
851	0.2	0.8	-0.114533
852	0.2	0.8	-0.156464
853	0.2	0.8	-0.138258
854	0.2	0.8	-0.128206
855	0.2	0.8	-0.126492
856	0.2	0.8	-0.145723
857	0.2	0.8	-0.13224
858	0.2	0.8	-0.157139
859	0.2	0.8	-0.0884608
860	0.2	0.8	-0.14746
861	0.2	0.8	-0.151571
862	0.2	0.8	-0.129498
863	0.2	0.8	-0.134593
864	0.2	0.8	-0.101925
865	0.2	0.8	-0.102392
866	0.2	0.8	-0.128891
867	0.2	0.8	-0.110353
868	0.2	0.8	-0.126396
869	0.2	0.8	-0.0549057
870	0.2	0.8	-0.112023
871	0.2	0.8	-0.126414
872	0.2	0.8	-0.12983
873	0.2	0.8	-0.14518
874	0.2	0.8	-0.0890148
875	0.2	0.8	-0.155769
876	0.2	0.8	-0.144473
877	0.2	0.8	-0.15836
878	0.2	0.8	-0.105412
879	0.2	0.8	-0.183504
880	0.2	0.8	-0.141853
881	0.2	0.8	-0.118057
882	0.2	0.8	-0.171954
883	0.2	0.8	-0.152856
884	0.2	0.8	-0.171318
885	0.2	0.8	-0.140144
886	0.2	0.8	-0.0959187
887	0.2	0.8	-0.157186
888	0.2	0.8	-0.103372
889	0.2	0.8	-0.124077
890	0.2	0.8	-0.104072
891	0.2	0.8	-0.158898
892	0.2	0.8	-0.173806
893	0.2	0.8	-0.143963
894	0.2	0.8	-0.117527
895	0.2	0.8	-0.175368
896	0.2	0.8	-0.128914
897	0.2	0.8	-0.150211
898	0.2	0.8	-0.167777
899	0.2	0.8	-0.11056
900	0.2	0.8	-0.157772
901	0.2	0.8	-0.126109
902	0.2	0.8	-0.111194
903	0.2	0.8	-0.174106
904	0.2	0.8	-0.158105
905	0.2	0.8	-0.153053
906	0.2	0.8	-0.118936
907	0.2	0.8	-0.150037
908	0.2	0.8	-0.127814
909	0.2	0.8	-0.141295
910	0.2	0.8	-0.14554
911	0.2	0.8	-0.115902
912	0.2	0.8	-0.0911254
913	0.2	0.8	-0.175989
914	0.2	0.8	-0.12042
915	0.2	0.8	-0.160067
916	0.2	0.8	-0.156401
917	0.2	0.8	-0.1235
918	0.2	0.8	-0.140179
919	0.2	0.8	-0.173739
920	0.2	0.8	-0.106231
921	0.2	0.8	-0.123906
922	0.2	0.8	-0.128174
923	0.2	0.8	-0.154778
924	0.2	0.8	-0.158174
925	0.2	0.8	-0.0750214
926	0.2	0.8	-0.150371
927	0.2	0.8	-0.163464
928	0.2	0.8	-0.134796
929	0.2	0.8	-0.145847
930	0.2	0.8	-0.129607
931	0.2	0.8	-0.096326
932	0.2	0.8	-0.142228
933	0.2	0.8	-0.174338
934	0.2	0.8	-0.135028
935	0.2	0.8	-0.173247
936	0.2	0.8	-0.124672
937	0.2	0.8	-0.135725
938	0.2	0.8	-0.189254
939	0.2	0.8	-0.182118
940	0.2	0.8	-0.145561
941	0.2	0.8	-0.136314
942	0.2	0.8	-0.12281
943	0.2	0.8	-0.161827
944	0.2	0.8	-0.114228
945	0.2	0.8	-0.15771
946	0.2	0.8	-0.127627
947	0.2	0.8	-0.177181
948	0.2	0.8	-0.143846
949	0.2	0.8	-0.180879
950	0.2	0.8	-0.149766
951	0.2	0.8	-0.132549
952	0.2	0.8	-0.123849
953	0.2	0.8	-0.160242
954	0.2	0.8	-0.0947863
955	0.2	0.8	-0.149104
956	0.2	0.8	-0.178702
957	0.2	0.8	-0.161018
958	0.2	0.8	-0.184702
959	0.2	0.8	-0.19705
960	0.2	0.8	-0.182217
961	0.2	0.8	-0.112501
962	0.2	0.8	-0.134721
963	0.2	0.8	-0.103449
964	0.2	0.8	-0.127743
965	0.2	0.8	-0.164042
966	0.2	0.8	-0.140663
967	0.2	0.8	-0.155313
968	0.2	0.8	-0.168215
969	0.2	0.8	-0.130079
970	0.2	0.8	-0.138791
971	0.2	0.8	-0.133553
972	0.2	0.8	-0.0952935
973	0.2	0.8	-0.128692
974	0.2	0.8	-0.144026
975	0.2	0.8	-0.163009
976	0.2	0.8	-0.139874
977	0.2	0.8	-0.0907542
978	0.2	0.8	-0.0984993
979	0.2	0.8	-0.183003
980	0.2	0.8	-0.0786785
981	0.2	0.8	-0.182739
982	0.2	0.8	-0.148058
983	0.2	0.8	-0.177066
984	0.2	0.8	-0.203157
985	0.2	0.8	-0.146519
986	0.2	0.8	-0.185774
987	0.2	0.8	-0.134175
988	0.2	0.8	-0.197106
989	0.2	0.8	-0.12672
990	0.2	0.8	-0.163053
991	0.2	0.8	-0.163794
992	0.2	0.8	-0.112257
993	0.2	0.8	-0.138521
994	0.2	0.8	-0.132393
995	0.2	0.8	-0.175892
996	0.2	0.8	-0.181683
997	0.2	0.8	-0.14803
998	0.2	0.8	-0.0883434
999	0.2	0.8	-0.156299
1000	0.2	0.8	-0.170354
