# Supplementary material for: Upstream open reading frames buffer translational variability during Drosophila evolution and development
Source: eLife. 2025 Jun 6;14:RP104074. doi: 10.7554/eLife.104074 (PMC12143884; doi:10.7554/eLife.104074)
Supplement: Figure 2—figure supplement 1—source data 1. [file elife-104074-fig2-figsupp1-data1.xlsx]

## Sheet: FigS14
# em02 = "embryo 0-2 h", "em26" = "embryo 2-6 h", "em612" = "embryo 6-12 h", "em1224" = "embryo 12-24 h","larva" = "larva", "pupa" = "pupa", "fem" = "female body", "mal" = "male body", "FH" = "female head", "MH" = "male head"
Sample	TE_median_rank1	TE_median_rank2	TE_median_rank3	TE_median_rank4
dmel_em02	0.947752	0.0407151	0	0
dmel_em26	1.95162	0.361894	0	0
dmel_em612	0.828486	0.131246	0	0
dmel_em1224	0.981755	0.325174	0	0
dmel_larva	2.59095	0.425674	0	0
dmel_pupa	1.91705	0.461434	0	0
dmel_fem	1.01538	0.222321	0	0
dmel_mal	1.37864	0.35334	0	0
dmel_FH	0.931019	0.207216	0	0
dmel_MH	1.13558	0.221924	0	0
dsim_em02	0.734785	0.0498817	0	0
dsim_em26	1.14295	0.102254	0	0
dsim_em612	0.727802	0.0830824	0	0
dsim_em1224	0.806267	0.143752	0	0
dsim_larva	1.81093	0.326551	0	0
dsim_pupa	1.32752	0.298759	0	0
dsim_fem	2.06767	0.425881	0	0
dsim_mal	2.16876	0.445774	0	0
dsim_FH	2.35828	0.511053	0	0
dsim_MH	1.87177	0.402081	0	0
