# Supplementary material for: Upstream open reading frames buffer translational variability during Drosophila evolution and development
Source: eLife. 2025 Jun 6;14:RP104074. doi: 10.7554/eLife.104074 (PMC12143884; doi:10.7554/eLife.104074)
Supplement: Figure 2—figure supplement 2—source data 1. [file elife-104074-fig2-figsupp2-data1.xlsx]

## Sheet: figS15
Condition	Gene_number
In_2_samples	7
In_2_samples	6
In_2_samples	5
In_2_samples	10
In_2_samples	6
In_2_samples	12
In_2_samples	5
In_2_samples	6
In_2_samples	8
In_2_samples	9
In_2_samples	9
In_2_samples	8
In_2_samples	7
In_2_samples	12
In_2_samples	16
In_2_samples	3
In_2_samples	17
In_2_samples	7
In_2_samples	6
In_2_samples	8
In_2_samples	9
In_2_samples	10
In_2_samples	6
In_2_samples	9
In_2_samples	7
In_2_samples	9
In_2_samples	9
In_2_samples	9
In_2_samples	6
In_2_samples	7
In_2_samples	13
In_2_samples	8
In_2_samples	11
In_2_samples	7
In_2_samples	13
In_2_samples	5
In_2_samples	3
In_2_samples	10
In_2_samples	5
In_2_samples	7
In_2_samples	6
In_2_samples	11
In_2_samples	11
In_2_samples	7
In_2_samples	8
In_2_samples	6
In_2_samples	7
In_2_samples	8
In_2_samples	14
In_2_samples	6
In_2_samples	9
In_2_samples	8
In_2_samples	10
In_2_samples	5
In_2_samples	9
In_2_samples	13
In_2_samples	10
In_2_samples	12
In_2_samples	4
In_2_samples	6
In_2_samples	9
In_2_samples	7
In_2_samples	7
In_2_samples	10
In_2_samples	9
In_2_samples	9
In_2_samples	9
In_2_samples	11
In_2_samples	6
In_2_samples	7
In_2_samples	14
In_2_samples	15
In_2_samples	13
In_2_samples	8
In_2_samples	6
In_2_samples	7
In_2_samples	10
In_2_samples	8
In_2_samples	4
In_2_samples	4
In_2_samples	10
In_2_samples	7
In_2_samples	4
In_2_samples	10
In_2_samples	3
In_2_samples	7
In_2_samples	6
In_2_samples	8
In_2_samples	4
In_2_samples	12
In_2_samples	3
In_2_samples	4
In_2_samples	9
In_2_samples	4
In_2_samples	3
In_2_samples	8
In_2_samples	7
In_2_samples	10
In_2_samples	9
In_2_samples	12
In_2_samples	8
In_2_samples	6
In_2_samples	15
In_2_samples	10
In_2_samples	4
In_2_samples	9
In_2_samples	11
In_2_samples	8
In_2_samples	9
In_2_samples	6
In_2_samples	7
In_2_samples	9
In_2_samples	10
In_2_samples	4
In_2_samples	11
In_2_samples	10
In_2_samples	14
In_2_samples	3
In_2_samples	12
In_2_samples	9
In_2_samples	12
In_2_samples	10
In_2_samples	8
In_2_samples	10
In_2_samples	9
In_2_samples	12
In_2_samples	10
In_2_samples	12
In_2_samples	7
In_2_samples	9
In_2_samples	11
In_2_samples	9
In_2_samples	10
In_2_samples	9
In_2_samples	8
In_2_samples	6
In_2_samples	7
In_2_samples	16
In_2_samples	9
In_2_samples	10
In_2_samples	4
In_2_samples	12
In_2_samples	9
In_2_samples	7
In_2_samples	7
In_2_samples	7
In_2_samples	7
In_2_samples	4
In_2_samples	5
In_2_samples	5
In_2_samples	7
In_2_samples	12
In_2_samples	9
In_2_samples	6
In_2_samples	7
In_2_samples	9
In_2_samples	9
In_2_samples	8
In_2_samples	3
In_2_samples	15
In_2_samples	5
In_2_samples	12
In_2_samples	0
In_2_samples	11
In_2_samples	8
In_2_samples	12
In_2_samples	18
In_2_samples	11
In_2_samples	9
In_2_samples	5
In_2_samples	9
In_2_samples	9
In_2_samples	7
In_2_samples	11
In_2_samples	9
In_2_samples	8
In_2_samples	12
In_2_samples	11
In_2_samples	7
In_2_samples	8
In_2_samples	7
In_2_samples	7
In_2_samples	8
In_2_samples	8
In_2_samples	6
In_2_samples	6
In_2_samples	7
In_2_samples	6
In_2_samples	5
In_2_samples	6
In_2_samples	11
In_2_samples	6
In_2_samples	13
In_2_samples	11
In_2_samples	8
In_2_samples	6
In_2_samples	5
In_2_samples	10
In_2_samples	5
In_2_samples	1
In_2_samples	12
In_2_samples	6
In_2_samples	6
In_2_samples	13
In_2_samples	7
In_2_samples	9
In_2_samples	6
In_2_samples	7
In_2_samples	11
In_2_samples	11
In_2_samples	7
In_2_samples	11
In_2_samples	8
In_2_samples	3
In_2_samples	5
In_2_samples	10
In_2_samples	7
In_2_samples	14
In_2_samples	6
In_2_samples	6
In_2_samples	8
In_2_samples	7
In_2_samples	7
In_2_samples	3
In_2_samples	7
In_2_samples	5
In_2_samples	9
In_2_samples	17
In_2_samples	13
In_2_samples	10
In_2_samples	15
In_2_samples	6
In_2_samples	5
In_2_samples	9
In_2_samples	6
In_2_samples	8
In_2_samples	7
In_2_samples	12
In_2_samples	6
In_2_samples	5
In_2_samples	8
In_2_samples	10
In_2_samples	7
In_2_samples	7
In_2_samples	12
In_2_samples	10
In_2_samples	5
In_2_samples	9
In_2_samples	8
In_2_samples	8
In_2_samples	8
In_2_samples	8
In_2_samples	4
In_2_samples	6
In_2_samples	10
In_2_samples	11
In_2_samples	8
In_2_samples	13
In_2_samples	10
In_2_samples	8
In_2_samples	7
In_2_samples	6
In_2_samples	6
In_2_samples	7
In_2_samples	13
In_2_samples	4
In_2_samples	8
In_2_samples	9
In_2_samples	8
In_2_samples	11
In_2_samples	10
In_2_samples	7
In_2_samples	6
In_2_samples	16
In_2_samples	6
In_2_samples	8
In_2_samples	7
In_2_samples	10
In_2_samples	2
In_2_samples	8
In_2_samples	5
In_2_samples	3
In_2_samples	9
In_2_samples	6
In_2_samples	9
In_2_samples	10
In_2_samples	11
In_2_samples	10
In_2_samples	9
In_2_samples	12
In_2_samples	8
In_2_samples	10
In_2_samples	9
In_2_samples	9
In_2_samples	8
In_2_samples	11
In_2_samples	5
In_2_samples	8
In_2_samples	11
In_2_samples	11
In_2_samples	8
In_2_samples	6
In_2_samples	11
In_2_samples	7
In_2_samples	11
In_2_samples	11
In_2_samples	5
In_2_samples	8
In_2_samples	6
In_2_samples	9
In_2_samples	8
In_2_samples	8
In_2_samples	13
In_2_samples	9
In_2_samples	5
In_2_samples	8
In_2_samples	9
In_2_samples	8
In_2_samples	4
In_2_samples	4
In_2_samples	5
In_2_samples	11
In_2_samples	8
In_2_samples	8
In_2_samples	8
In_2_samples	15
In_2_samples	6
In_2_samples	11
In_2_samples	13
In_2_samples	13
In_2_samples	9
In_2_samples	9
In_2_samples	5
In_2_samples	6
In_2_samples	8
In_2_samples	6
In_2_samples	3
In_2_samples	3
In_2_samples	12
In_2_samples	8
In_2_samples	11
In_2_samples	9
In_2_samples	7
In_2_samples	12
In_2_samples	9
In_2_samples	5
In_2_samples	8
In_2_samples	9
In_2_samples	8
In_2_samples	10
In_2_samples	8
In_2_samples	8
In_2_samples	7
In_2_samples	15
In_2_samples	10
In_2_samples	6
In_2_samples	8
In_2_samples	3
In_2_samples	15
In_2_samples	6
In_2_samples	7
In_2_samples	9
In_2_samples	8
In_2_samples	11
In_2_samples	5
In_2_samples	4
In_2_samples	11
In_2_samples	3
In_2_samples	7
In_2_samples	5
In_2_samples	8
In_2_samples	10
In_2_samples	5
In_2_samples	7
In_2_samples	10
In_2_samples	8
In_2_samples	9
In_2_samples	5
In_2_samples	7
In_2_samples	6
In_2_samples	6
In_2_samples	8
In_2_samples	3
In_2_samples	4
In_2_samples	4
In_2_samples	10
In_2_samples	12
In_2_samples	12
In_2_samples	8
In_2_samples	4
In_2_samples	10
In_2_samples	7
In_2_samples	7
In_2_samples	10
In_2_samples	6
In_2_samples	15
In_2_samples	8
In_2_samples	6
In_2_samples	8
In_2_samples	9
In_2_samples	13
In_2_samples	6
In_2_samples	6
In_2_samples	11
In_2_samples	5
In_2_samples	6
In_2_samples	9
In_2_samples	10
In_2_samples	4
In_2_samples	15
In_2_samples	6
In_2_samples	8
In_2_samples	7
In_2_samples	9
In_2_samples	8
In_2_samples	6
In_2_samples	13
In_2_samples	8
In_2_samples	7
In_2_samples	8
In_2_samples	11
In_2_samples	5
In_2_samples	11
In_2_samples	4
In_2_samples	6
In_2_samples	9
In_2_samples	10
In_2_samples	8
In_2_samples	9
In_2_samples	9
In_2_samples	11
In_2_samples	7
In_2_samples	7
In_2_samples	6
In_2_samples	11
In_2_samples	18
In_2_samples	8
In_2_samples	10
In_2_samples	8
In_2_samples	4
In_2_samples	6
In_2_samples	5
In_2_samples	11
In_2_samples	12
In_2_samples	5
In_2_samples	7
In_2_samples	9
In_2_samples	11
In_2_samples	7
In_2_samples	5
In_2_samples	10
In_2_samples	5
In_2_samples	8
In_2_samples	7
In_2_samples	10
In_2_samples	6
In_2_samples	11
In_2_samples	7
In_2_samples	6
In_2_samples	6
In_2_samples	13
In_2_samples	10
In_2_samples	7
In_2_samples	6
In_2_samples	9
In_2_samples	15
In_2_samples	7
In_2_samples	5
In_2_samples	6
In_2_samples	9
In_2_samples	7
In_2_samples	6
In_2_samples	12
In_2_samples	6
In_2_samples	6
In_2_samples	4
In_2_samples	2
In_2_samples	8
In_2_samples	7
In_2_samples	6
In_2_samples	6
In_2_samples	12
In_2_samples	9
In_2_samples	5
In_2_samples	15
In_2_samples	4
In_2_samples	12
In_2_samples	9
In_2_samples	10
In_2_samples	12
In_2_samples	9
In_2_samples	9
In_2_samples	6
In_2_samples	12
In_2_samples	17
In_2_samples	12
In_2_samples	9
In_2_samples	8
In_2_samples	2
In_2_samples	7
In_2_samples	12
In_2_samples	7
In_2_samples	7
In_2_samples	9
In_2_samples	7
In_2_samples	9
In_2_samples	7
In_2_samples	6
In_2_samples	15
In_2_samples	8
In_2_samples	10
In_2_samples	12
In_2_samples	5
In_2_samples	10
In_2_samples	8
In_2_samples	6
In_2_samples	7
In_2_samples	12
In_2_samples	9
In_2_samples	13
In_2_samples	12
In_2_samples	7
In_2_samples	12
In_2_samples	15
In_2_samples	11
In_2_samples	10
In_2_samples	9
In_2_samples	7
In_2_samples	5
In_2_samples	2
In_2_samples	18
In_2_samples	13
In_2_samples	9
In_2_samples	12
In_2_samples	10
In_2_samples	7
In_2_samples	4
In_2_samples	7
In_2_samples	6
In_2_samples	10
In_2_samples	9
In_2_samples	2
In_2_samples	12
In_2_samples	5
In_2_samples	6
In_2_samples	7
In_2_samples	6
In_2_samples	11
In_2_samples	9
In_2_samples	6
In_2_samples	8
In_2_samples	5
In_2_samples	3
In_2_samples	4
In_2_samples	11
In_2_samples	3
In_2_samples	3
In_2_samples	3
In_2_samples	9
In_2_samples	13
In_2_samples	7
In_2_samples	12
In_2_samples	15
In_2_samples	3
In_2_samples	14
In_2_samples	4
In_2_samples	10
In_2_samples	6
In_2_samples	4
In_2_samples	7
In_2_samples	3
In_2_samples	10
In_2_samples	11
In_2_samples	7
In_2_samples	7
In_2_samples	8
In_2_samples	4
In_2_samples	9
In_2_samples	5
In_2_samples	8
In_2_samples	4
In_2_samples	9
In_2_samples	8
In_2_samples	9
In_2_samples	9
In_2_samples	7
In_2_samples	9
In_2_samples	4
In_2_samples	7
In_2_samples	9
In_2_samples	11
In_2_samples	5
In_2_samples	10
In_2_samples	12
In_2_samples	13
In_2_samples	6
In_2_samples	7
In_2_samples	12
In_2_samples	7
In_2_samples	9
In_2_samples	9
In_2_samples	8
In_2_samples	6
In_2_samples	9
In_2_samples	7
In_2_samples	7
In_2_samples	11
In_2_samples	9
In_2_samples	7
In_2_samples	8
In_2_samples	6
In_2_samples	10
In_2_samples	7
In_2_samples	8
In_2_samples	7
In_2_samples	8
In_2_samples	10
In_2_samples	7
In_2_samples	8
In_2_samples	10
In_2_samples	9
In_2_samples	10
In_2_samples	12
In_2_samples	7
In_2_samples	8
In_2_samples	10
In_2_samples	6
In_2_samples	7
In_2_samples	8
In_2_samples	14
In_2_samples	5
In_2_samples	8
In_2_samples	5
In_2_samples	9
In_2_samples	6
In_2_samples	5
In_2_samples	13
In_2_samples	16
In_2_samples	5
In_2_samples	9
In_2_samples	8
In_2_samples	7
In_2_samples	8
In_2_samples	8
In_2_samples	10
In_2_samples	13
In_2_samples	8
In_2_samples	5
In_2_samples	8
In_2_samples	8
In_2_samples	13
In_2_samples	7
In_2_samples	6
In_2_samples	9
In_2_samples	7
In_2_samples	7
In_2_samples	6
In_2_samples	9
In_2_samples	10
In_2_samples	7
In_2_samples	11
In_2_samples	11
In_2_samples	7
In_2_samples	10
In_2_samples	6
In_2_samples	12
In_2_samples	3
In_2_samples	10
In_2_samples	5
In_2_samples	8
In_2_samples	9
In_2_samples	6
In_2_samples	6
In_2_samples	13
In_2_samples	10
In_2_samples	8
In_2_samples	9
In_2_samples	7
In_2_samples	12
In_2_samples	7
In_2_samples	15
In_2_samples	8
In_2_samples	10
In_2_samples	10
In_2_samples	6
In_2_samples	6
In_2_samples	9
In_2_samples	9
In_2_samples	9
In_2_samples	6
In_2_samples	9
In_2_samples	13
In_2_samples	15
In_2_samples	11
In_2_samples	7
In_2_samples	10
In_2_samples	5
In_2_samples	5
In_2_samples	8
In_2_samples	6
In_2_samples	10
In_2_samples	7
In_2_samples	9
In_2_samples	9
In_2_samples	4
In_2_samples	8
In_2_samples	4
In_2_samples	13
In_2_samples	11
In_2_samples	13
In_2_samples	7
In_2_samples	8
In_2_samples	9
In_2_samples	10
In_2_samples	8
In_2_samples	4
In_2_samples	15
In_2_samples	6
In_2_samples	13
In_2_samples	7
In_2_samples	13
In_2_samples	12
In_2_samples	7
In_2_samples	11
In_2_samples	15
In_2_samples	7
In_2_samples	13
In_2_samples	6
In_2_samples	9
In_2_samples	7
In_2_samples	4
In_2_samples	14
In_2_samples	10
In_2_samples	13
In_2_samples	10
In_2_samples	7
In_2_samples	11
In_2_samples	8
In_2_samples	7
In_2_samples	8
In_2_samples	5
In_2_samples	10
In_2_samples	5
In_2_samples	6
In_2_samples	10
In_2_samples	14
In_2_samples	7
In_2_samples	7
In_2_samples	9
In_2_samples	6
In_2_samples	12
In_2_samples	8
In_2_samples	6
In_2_samples	7
In_2_samples	16
In_2_samples	5
In_2_samples	6
In_2_samples	13
In_2_samples	10
In_2_samples	8
In_2_samples	9
In_2_samples	15
In_2_samples	5
In_2_samples	10
In_2_samples	8
In_2_samples	13
In_2_samples	6
In_2_samples	12
In_2_samples	10
In_2_samples	9
In_2_samples	11
In_2_samples	8
In_2_samples	5
In_2_samples	10
In_2_samples	8
In_2_samples	5
In_2_samples	9
In_2_samples	4
In_2_samples	4
In_2_samples	10
In_2_samples	6
In_2_samples	16
In_2_samples	8
In_2_samples	5
In_2_samples	11
In_2_samples	9
In_2_samples	6
In_2_samples	7
In_2_samples	8
In_2_samples	9
In_2_samples	11
In_2_samples	5
In_2_samples	6
In_2_samples	10
In_2_samples	8
In_2_samples	7
In_2_samples	10
In_2_samples	10
In_2_samples	10
In_2_samples	8
In_2_samples	7
In_2_samples	10
In_2_samples	10
In_2_samples	8
In_2_samples	6
In_2_samples	10
In_2_samples	9
In_2_samples	7
In_2_samples	8
In_2_samples	11
In_2_samples	8
In_2_samples	10
In_2_samples	7
In_2_samples	8
In_2_samples	11
In_2_samples	6
In_2_samples	12
In_2_samples	6
In_2_samples	6
In_2_samples	3
In_2_samples	8
In_2_samples	8
In_2_samples	6
In_2_samples	4
In_2_samples	6
In_2_samples	8
In_2_samples	4
In_2_samples	5
In_2_samples	11
In_2_samples	9
In_2_samples	7
In_2_samples	9
In_2_samples	9
In_2_samples	6
In_2_samples	5
In_2_samples	10
In_2_samples	6
In_2_samples	8
In_2_samples	8
In_2_samples	9
In_2_samples	8
In_2_samples	8
In_2_samples	5
In_2_samples	11
In_2_samples	3
In_2_samples	6
In_2_samples	6
In_2_samples	5
In_2_samples	6
In_2_samples	6
In_2_samples	11
In_2_samples	11
In_2_samples	8
In_2_samples	5
In_2_samples	5
In_2_samples	9
In_2_samples	5
In_2_samples	5
In_2_samples	9
In_2_samples	11
In_2_samples	8
In_2_samples	5
In_2_samples	14
In_2_samples	4
In_2_samples	12
In_2_samples	12
In_2_samples	4
In_2_samples	10
In_2_samples	3
In_2_samples	3
In_2_samples	8
In_2_samples	4
In_2_samples	11
In_2_samples	9
In_2_samples	9
In_2_samples	7
In_2_samples	8
In_2_samples	5
In_2_samples	11
In_2_samples	8
In_2_samples	8
In_2_samples	12
In_2_samples	8
In_2_samples	6
In_2_samples	6
In_2_samples	5
In_2_samples	10
In_2_samples	6
In_2_samples	2
In_2_samples	10
In_2_samples	8
In_2_samples	6
In_2_samples	9
In_2_samples	13
In_2_samples	4
In_2_samples	8
In_2_samples	4
In_2_samples	4
In_2_samples	11
In_2_samples	9
In_2_samples	9
In_2_samples	8
In_2_samples	6
In_2_samples	7
In_2_samples	4
In_2_samples	4
In_2_samples	11
In_2_samples	8
In_2_samples	9
In_2_samples	8
In_2_samples	12
In_2_samples	9
In_2_samples	5
In_2_samples	5
In_2_samples	8
In_2_samples	11
In_2_samples	5
In_2_samples	9
In_2_samples	13
In_2_samples	10
In_2_samples	8
In_2_samples	8
In_2_samples	12
In_2_samples	8
In_2_samples	10
In_2_samples	9
In_2_samples	7
In_2_samples	13
In_2_samples	8
In_2_samples	11
In_2_samples	8
In_2_samples	4
In_2_samples	13
In_2_samples	12
In_2_samples	8
In_2_samples	4
In_2_samples	4
In_2_samples	7
In_2_samples	9
In_2_samples	7
In_2_samples	13
In_2_samples	7
In_2_samples	4
In_2_samples	9
In_2_samples	8
In_2_samples	6
In_2_samples	7
In_2_samples	9
In_2_samples	7
In_2_samples	9
In_2_samples	4
In_2_samples	3
In_2_samples	6
In_2_samples	8
In_2_samples	7
In_2_samples	7
In_2_samples	8
In_2_samples	8
In_2_samples	12
In_2_samples	3
In_2_samples	13
In_2_samples	8
In_2_samples	7
In_2_samples	7
In_2_samples	4
In_2_samples	15
In_2_samples	11
In_2_samples	7
In_2_samples	8
In_2_samples	11
In_2_samples	5
In_2_samples	11
In_2_samples	10
In_2_samples	7
In_2_samples	4
In_2_samples	15
In_2_samples	6
In_2_samples	5
In_2_samples	9
In_2_samples	15
In_2_samples	15
In_2_samples	8
In_2_samples	10
In_2_samples	10
In_2_samples	13
In_2_samples	7
In_2_samples	7
In_2_samples	18
In_2_samples	5
In_2_samples	10
In_2_samples	10
In_2_samples	6
In_2_samples	12
In_2_samples	6
In_2_samples	8
In_2_samples	10
In_2_samples	7
In_2_samples	7
In_2_samples	7
In_2_samples	8
In_3_samples	7
In_3_samples	5
In_3_samples	7
In_3_samples	7
In_3_samples	7
In_3_samples	4
In_3_samples	7
In_3_samples	7
In_3_samples	8
In_3_samples	10
In_3_samples	5
In_3_samples	12
In_3_samples	8
In_3_samples	8
In_3_samples	11
In_3_samples	14
In_3_samples	5
In_3_samples	4
In_3_samples	7
In_3_samples	14
In_3_samples	7
In_3_samples	2
In_3_samples	6
In_3_samples	5
In_3_samples	4
In_3_samples	3
In_3_samples	7
In_3_samples	4
In_3_samples	11
In_3_samples	11
In_3_samples	4
In_3_samples	5
In_3_samples	4
In_3_samples	12
In_3_samples	12
In_3_samples	7
In_3_samples	8
In_3_samples	9
In_3_samples	6
In_3_samples	5
In_3_samples	10
In_3_samples	4
In_3_samples	4
In_3_samples	4
In_3_samples	10
In_3_samples	4
In_3_samples	9
In_3_samples	8
In_3_samples	6
In_3_samples	6
In_3_samples	5
In_3_samples	13
In_3_samples	5
In_3_samples	8
In_3_samples	9
In_3_samples	7
In_3_samples	5
In_3_samples	5
In_3_samples	12
In_3_samples	9
In_3_samples	7
In_3_samples	7
In_3_samples	12
In_3_samples	6
In_3_samples	9
In_3_samples	6
In_3_samples	7
In_3_samples	8
In_3_samples	12
In_3_samples	8
In_3_samples	2
In_3_samples	9
In_3_samples	6
In_3_samples	5
In_3_samples	5
In_3_samples	7
In_3_samples	11
In_3_samples	9
In_3_samples	6
In_3_samples	6
In_3_samples	8
In_3_samples	5
In_3_samples	5
In_3_samples	6
In_3_samples	8
In_3_samples	13
In_3_samples	3
In_3_samples	4
In_3_samples	8
In_3_samples	3
In_3_samples	6
In_3_samples	7
In_3_samples	3
In_3_samples	15
In_3_samples	5
In_3_samples	5
In_3_samples	12
In_3_samples	5
In_3_samples	4
In_3_samples	10
In_3_samples	6
In_3_samples	8
In_3_samples	12
In_3_samples	6
In_3_samples	3
In_3_samples	6
In_3_samples	6
In_3_samples	3
In_3_samples	9
In_3_samples	3
In_3_samples	4
In_3_samples	4
In_3_samples	4
In_3_samples	8
In_3_samples	8
In_3_samples	10
In_3_samples	5
In_3_samples	9
In_3_samples	5
In_3_samples	5
In_3_samples	7
In_3_samples	4
In_3_samples	6
In_3_samples	7
In_3_samples	6
In_3_samples	6
In_3_samples	10
In_3_samples	6
In_3_samples	10
In_3_samples	2
In_3_samples	7
In_3_samples	5
In_3_samples	16
In_3_samples	4
In_3_samples	4
In_3_samples	6
In_3_samples	12
In_3_samples	9
In_3_samples	3
In_3_samples	8
In_3_samples	6
In_3_samples	7
In_3_samples	7
In_3_samples	7
In_3_samples	6
In_3_samples	5
In_3_samples	3
In_3_samples	8
In_3_samples	8
In_3_samples	7
In_3_samples	10
In_3_samples	11
In_3_samples	11
In_3_samples	9
In_3_samples	9
In_3_samples	6
In_3_samples	5
In_3_samples	6
In_3_samples	13
In_3_samples	8
In_3_samples	5
In_3_samples	8
In_3_samples	16
In_3_samples	7
In_3_samples	6
In_3_samples	7
In_3_samples	6
In_3_samples	15
In_3_samples	5
In_3_samples	10
In_3_samples	5
In_3_samples	4
In_3_samples	6
In_3_samples	6
In_3_samples	11
In_3_samples	13
In_3_samples	14
In_3_samples	7
In_3_samples	5
In_3_samples	10
In_3_samples	9
In_3_samples	11
In_3_samples	10
In_3_samples	8
In_3_samples	6
In_3_samples	3
In_3_samples	10
In_3_samples	12
In_3_samples	8
In_3_samples	9
In_3_samples	7
In_3_samples	7
In_3_samples	4
In_3_samples	8
In_3_samples	10
In_3_samples	7
In_3_samples	7
In_3_samples	5
In_3_samples	15
In_3_samples	10
In_3_samples	10
In_3_samples	3
In_3_samples	11
In_3_samples	6
In_3_samples	5
In_3_samples	5
In_3_samples	12
In_3_samples	5
In_3_samples	7
In_3_samples	8
In_3_samples	11
In_3_samples	6
In_3_samples	8
In_3_samples	5
In_3_samples	7
In_3_samples	5
In_3_samples	7
In_3_samples	12
In_3_samples	3
In_3_samples	8
In_3_samples	8
In_3_samples	5
In_3_samples	12
In_3_samples	4
In_3_samples	7
In_3_samples	6
In_3_samples	9
In_3_samples	11
In_3_samples	10
In_3_samples	8
In_3_samples	8
In_3_samples	8
In_3_samples	3
In_3_samples	8
In_3_samples	3
In_3_samples	9
In_3_samples	10
In_3_samples	7
In_3_samples	13
In_3_samples	7
In_3_samples	12
In_3_samples	7
In_3_samples	7
In_3_samples	9
In_3_samples	3
In_3_samples	7
In_3_samples	9
In_3_samples	7
In_3_samples	7
In_3_samples	11
In_3_samples	8
In_3_samples	6
In_3_samples	7
In_3_samples	8
In_3_samples	8
In_3_samples	5
In_3_samples	9
In_3_samples	7
In_3_samples	6
In_3_samples	6
In_3_samples	2
In_3_samples	4
In_3_samples	5
In_3_samples	4
In_3_samples	16
In_3_samples	8
In_3_samples	8
In_3_samples	2
In_3_samples	5
In_3_samples	4
In_3_samples	6
In_3_samples	16
In_3_samples	7
In_3_samples	8
In_3_samples	9
In_3_samples	4
In_3_samples	4
In_3_samples	7
In_3_samples	6
In_3_samples	11
In_3_samples	9
In_3_samples	5
In_3_samples	8
In_3_samples	6
In_3_samples	7
In_3_samples	6
In_3_samples	10
In_3_samples	4
In_3_samples	9
In_3_samples	8
In_3_samples	6
In_3_samples	10
In_3_samples	6
In_3_samples	9
In_3_samples	6
In_3_samples	8
In_3_samples	12
In_3_samples	6
In_3_samples	8
In_3_samples	6
In_3_samples	7
In_3_samples	7
In_3_samples	9
In_3_samples	4
In_3_samples	7
In_3_samples	4
In_3_samples	4
In_3_samples	6
In_3_samples	11
In_3_samples	8
In_3_samples	6
In_3_samples	4
In_3_samples	16
In_3_samples	4
In_3_samples	8
In_3_samples	9
In_3_samples	4
In_3_samples	5
In_3_samples	4
In_3_samples	8
In_3_samples	10
In_3_samples	10
In_3_samples	3
In_3_samples	8
In_3_samples	4
In_3_samples	6
In_3_samples	10
In_3_samples	8
In_3_samples	8
In_3_samples	7
In_3_samples	6
In_3_samples	7
In_3_samples	4
In_3_samples	4
In_3_samples	10
In_3_samples	8
In_3_samples	9
In_3_samples	6
In_3_samples	5
In_3_samples	5
In_3_samples	5
In_3_samples	11
In_3_samples	6
In_3_samples	6
In_3_samples	8
In_3_samples	7
In_3_samples	2
In_3_samples	10
In_3_samples	3
In_3_samples	9
In_3_samples	11
In_3_samples	7
In_3_samples	5
In_3_samples	5
In_3_samples	11
In_3_samples	8
In_3_samples	6
In_3_samples	8
In_3_samples	9
In_3_samples	4
In_3_samples	5
In_3_samples	3
In_3_samples	1
In_3_samples	8
In_3_samples	8
In_3_samples	7
In_3_samples	6
In_3_samples	7
In_3_samples	2
In_3_samples	9
In_3_samples	12
In_3_samples	12
In_3_samples	6
In_3_samples	6
In_3_samples	10
In_3_samples	9
In_3_samples	8
In_3_samples	9
In_3_samples	7
In_3_samples	7
In_3_samples	7
In_3_samples	7
In_3_samples	1
In_3_samples	9
In_3_samples	5
In_3_samples	7
In_3_samples	7
In_3_samples	12
In_3_samples	8
In_3_samples	7
In_3_samples	7
In_3_samples	10
In_3_samples	9
In_3_samples	7
In_3_samples	8
In_3_samples	3
In_3_samples	3
In_3_samples	10
In_3_samples	6
In_3_samples	9
In_3_samples	6
In_3_samples	8
In_3_samples	7
In_3_samples	8
In_3_samples	2
In_3_samples	5
In_3_samples	10
In_3_samples	10
In_3_samples	7
In_3_samples	7
In_3_samples	9
In_3_samples	9
In_3_samples	8
In_3_samples	7
In_3_samples	3
In_3_samples	9
In_3_samples	3
In_3_samples	8
In_3_samples	7
In_3_samples	8
In_3_samples	4
In_3_samples	9
In_3_samples	7
In_3_samples	7
In_3_samples	8
In_3_samples	13
In_3_samples	8
In_3_samples	5
In_3_samples	7
In_3_samples	8
In_3_samples	7
In_3_samples	7
In_3_samples	10
In_3_samples	10
In_3_samples	6
In_3_samples	8
In_3_samples	13
In_3_samples	8
In_3_samples	6
In_3_samples	8
In_3_samples	8
In_3_samples	10
In_3_samples	5
In_3_samples	8
In_3_samples	7
In_3_samples	10
In_3_samples	6
In_3_samples	7
In_3_samples	5
In_3_samples	2
In_3_samples	14
In_3_samples	8
In_3_samples	5
In_3_samples	5
In_3_samples	6
In_3_samples	5
In_3_samples	2
In_3_samples	7
In_3_samples	6
In_3_samples	6
In_3_samples	3
In_3_samples	8
In_3_samples	10
In_3_samples	8
In_3_samples	6
In_3_samples	5
In_3_samples	4
In_3_samples	7
In_3_samples	6
In_3_samples	3
In_3_samples	13
In_3_samples	8
In_3_samples	12
In_3_samples	7
In_3_samples	7
In_3_samples	5
In_3_samples	11
In_3_samples	4
In_3_samples	6
In_3_samples	8
In_3_samples	7
In_3_samples	8
In_3_samples	3
In_3_samples	10
In_3_samples	4
In_3_samples	9
In_3_samples	3
In_3_samples	9
In_3_samples	9
In_3_samples	8
In_3_samples	10
In_3_samples	5
In_3_samples	6
In_3_samples	8
In_3_samples	9
In_3_samples	7
In_3_samples	10
In_3_samples	7
In_3_samples	5
In_3_samples	7
In_3_samples	3
In_3_samples	5
In_3_samples	8
In_3_samples	3
In_3_samples	10
In_3_samples	6
In_3_samples	5
In_3_samples	5
In_3_samples	8
In_3_samples	7
In_3_samples	8
In_3_samples	5
In_3_samples	3
In_3_samples	6
In_3_samples	9
In_3_samples	7
In_3_samples	4
In_3_samples	5
In_3_samples	4
In_3_samples	5
In_3_samples	10
In_3_samples	8
In_3_samples	10
In_3_samples	3
In_3_samples	7
In_3_samples	6
In_3_samples	3
In_3_samples	5
In_3_samples	6
In_3_samples	6
In_3_samples	4
In_3_samples	6
In_3_samples	6
In_3_samples	7
In_3_samples	7
In_3_samples	9
In_3_samples	4
In_3_samples	3
In_3_samples	14
In_3_samples	4
In_3_samples	5
In_3_samples	8
In_3_samples	6
In_3_samples	7
In_3_samples	1
In_3_samples	5
In_3_samples	8
In_3_samples	5
In_3_samples	4
In_3_samples	10
In_3_samples	6
In_3_samples	8
In_3_samples	9
In_3_samples	8
In_3_samples	12
In_3_samples	9
In_3_samples	9
In_3_samples	8
In_3_samples	10
In_3_samples	5
In_3_samples	9
In_3_samples	9
In_3_samples	8
In_3_samples	10
In_3_samples	7
In_3_samples	4
In_3_samples	7
In_3_samples	3
In_3_samples	6
In_3_samples	7
In_3_samples	6
In_3_samples	5
In_3_samples	5
In_3_samples	7
In_3_samples	6
In_3_samples	10
In_3_samples	5
In_3_samples	10
In_3_samples	6
In_3_samples	5
In_3_samples	11
In_3_samples	7
In_3_samples	4
In_3_samples	11
In_3_samples	4
In_3_samples	8
In_3_samples	7
In_3_samples	3
In_3_samples	8
In_3_samples	9
In_3_samples	9
In_3_samples	14
In_3_samples	4
In_3_samples	7
In_3_samples	6
In_3_samples	7
In_3_samples	4
In_3_samples	11
In_3_samples	6
In_3_samples	7
In_3_samples	8
In_3_samples	10
In_3_samples	7
In_3_samples	8
In_3_samples	9
In_3_samples	4
In_3_samples	6
In_3_samples	10
In_3_samples	2
In_3_samples	3
In_3_samples	5
In_3_samples	10
In_3_samples	7
In_3_samples	9
In_3_samples	7
In_3_samples	8
In_3_samples	4
In_3_samples	9
In_3_samples	9
In_3_samples	9
In_3_samples	7
In_3_samples	9
In_3_samples	10
In_3_samples	7
In_3_samples	8
In_3_samples	2
In_3_samples	10
In_3_samples	8
In_3_samples	12
In_3_samples	10
In_3_samples	5
In_3_samples	5
In_3_samples	4
In_3_samples	3
In_3_samples	8
In_3_samples	4
In_3_samples	4
In_3_samples	8
In_3_samples	8
In_3_samples	9
In_3_samples	5
In_3_samples	6
In_3_samples	6
In_3_samples	10
In_3_samples	10
In_3_samples	6
In_3_samples	6
In_3_samples	11
In_3_samples	5
In_3_samples	12
In_3_samples	8
In_3_samples	8
In_3_samples	10
In_3_samples	7
In_3_samples	11
In_3_samples	4
In_3_samples	2
In_3_samples	5
In_3_samples	8
In_3_samples	8
In_3_samples	5
In_3_samples	8
In_3_samples	7
In_3_samples	5
In_3_samples	5
In_3_samples	4
In_3_samples	6
In_3_samples	10
In_3_samples	12
In_3_samples	4
In_3_samples	6
In_3_samples	5
In_3_samples	7
In_3_samples	9
In_3_samples	9
In_3_samples	9
In_3_samples	11
In_3_samples	14
In_3_samples	3
In_3_samples	7
In_3_samples	7
In_3_samples	6
In_3_samples	5
In_3_samples	2
In_3_samples	3
In_3_samples	9
In_3_samples	6
In_3_samples	9
In_3_samples	9
In_3_samples	4
In_3_samples	6
In_3_samples	10
In_3_samples	15
In_3_samples	5
In_3_samples	7
In_3_samples	7
In_3_samples	9
In_3_samples	5
In_3_samples	6
In_3_samples	14
In_3_samples	6
In_3_samples	9
In_3_samples	12
In_3_samples	7
In_3_samples	5
In_3_samples	6
In_3_samples	8
In_3_samples	7
In_3_samples	8
In_3_samples	2
In_3_samples	7
In_3_samples	10
In_3_samples	6
In_3_samples	6
In_3_samples	10
In_3_samples	5
In_3_samples	8
In_3_samples	10
In_3_samples	5
In_3_samples	9
In_3_samples	4
In_3_samples	10
In_3_samples	5
In_3_samples	5
In_3_samples	5
In_3_samples	7
In_3_samples	7
In_3_samples	10
In_3_samples	7
In_3_samples	5
In_3_samples	5
In_3_samples	2
In_3_samples	7
In_3_samples	5
In_3_samples	6
In_3_samples	5
In_3_samples	4
In_3_samples	10
In_3_samples	2
In_3_samples	5
In_3_samples	9
In_3_samples	7
In_3_samples	7
In_3_samples	8
In_3_samples	4
In_3_samples	7
In_3_samples	7
In_3_samples	7
In_3_samples	6
In_3_samples	10
In_3_samples	5
In_3_samples	6
In_3_samples	4
In_3_samples	6
In_3_samples	6
In_3_samples	9
In_3_samples	8
In_3_samples	7
In_3_samples	8
In_3_samples	5
In_3_samples	10
In_3_samples	5
In_3_samples	9
In_3_samples	7
In_3_samples	7
In_3_samples	5
In_3_samples	5
In_3_samples	6
In_3_samples	8
In_3_samples	7
In_3_samples	5
In_3_samples	5
In_3_samples	4
In_3_samples	7
In_3_samples	4
In_3_samples	3
In_3_samples	8
In_3_samples	9
In_3_samples	10
In_3_samples	5
In_3_samples	7
In_3_samples	10
In_3_samples	5
In_3_samples	6
In_3_samples	6
In_3_samples	10
In_3_samples	10
In_3_samples	8
In_3_samples	8
In_3_samples	9
In_3_samples	6
In_3_samples	9
In_3_samples	6
In_3_samples	12
In_3_samples	5
In_3_samples	7
In_3_samples	11
In_3_samples	10
In_3_samples	9
In_3_samples	7
In_3_samples	5
In_3_samples	8
In_3_samples	13
In_3_samples	4
In_3_samples	5
In_3_samples	6
In_3_samples	8
In_3_samples	4
In_3_samples	9
In_3_samples	9
In_3_samples	10
In_3_samples	16
In_3_samples	8
In_3_samples	11
In_3_samples	9
In_3_samples	7
In_3_samples	8
In_3_samples	6
In_3_samples	8
In_3_samples	9
In_3_samples	8
In_3_samples	11
In_3_samples	11
In_3_samples	10
In_3_samples	7
In_3_samples	2
In_3_samples	8
In_3_samples	5
In_3_samples	6
In_3_samples	3
In_3_samples	7
In_3_samples	7
In_3_samples	4
In_3_samples	12
In_3_samples	9
In_3_samples	8
In_3_samples	10
In_3_samples	6
In_3_samples	6
In_3_samples	2
In_3_samples	9
In_3_samples	6
In_3_samples	6
In_3_samples	11
In_3_samples	7
In_3_samples	10
In_3_samples	12
In_3_samples	10
In_3_samples	10
In_3_samples	6
In_3_samples	7
In_3_samples	6
In_3_samples	5
In_3_samples	9
In_3_samples	13
In_3_samples	7
In_3_samples	5
In_3_samples	6
In_3_samples	10
In_3_samples	6
In_3_samples	6
In_3_samples	9
In_3_samples	7
In_3_samples	7
In_3_samples	10
In_3_samples	13
In_3_samples	8
In_3_samples	5
In_3_samples	0
In_3_samples	2
In_3_samples	6
In_3_samples	9
In_3_samples	8
In_3_samples	4
In_3_samples	4
In_3_samples	7
In_3_samples	6
In_3_samples	6
In_3_samples	9
In_3_samples	10
In_3_samples	8
In_3_samples	4
In_3_samples	3
In_3_samples	7
In_3_samples	4
In_3_samples	5
In_3_samples	6
In_3_samples	7
In_3_samples	5
In_3_samples	10
In_3_samples	8
In_3_samples	6
In_3_samples	9
In_3_samples	17
In_3_samples	2
In_3_samples	7
In_3_samples	9
In_3_samples	11
In_3_samples	11
In_3_samples	11
In_3_samples	10
In_3_samples	8
In_3_samples	2
In_3_samples	8
In_3_samples	6
In_3_samples	7
In_3_samples	9
In_3_samples	3
In_3_samples	5
In_3_samples	6
In_3_samples	7
In_3_samples	8
In_3_samples	7
In_3_samples	6
In_3_samples	2
In_3_samples	8
In_3_samples	6
In_3_samples	6
In_3_samples	8
In_3_samples	10
In_3_samples	5
In_3_samples	4
In_3_samples	5
In_3_samples	7
In_3_samples	8
In_3_samples	9
In_3_samples	9
In_3_samples	15
In_3_samples	6
In_3_samples	3
In_3_samples	5
In_3_samples	9
In_3_samples	2
In_3_samples	10
In_3_samples	11
In_3_samples	4
In_3_samples	6
In_3_samples	6
In_3_samples	11
In_3_samples	10
In_3_samples	2
In_3_samples	7
In_3_samples	9
In_3_samples	9
In_3_samples	9
In_3_samples	4
In_3_samples	7
In_3_samples	8
In_3_samples	5
In_3_samples	10
In_3_samples	5
In_3_samples	7
In_3_samples	4
In_3_samples	6
In_3_samples	6
In_3_samples	9
In_3_samples	7
In_3_samples	9
In_3_samples	6
In_3_samples	7
In_3_samples	9
In_3_samples	5
In_3_samples	4
In_3_samples	8
In_3_samples	11
In_3_samples	6
In_3_samples	7
In_3_samples	6
In_3_samples	8
In_3_samples	7
In_3_samples	10
In_3_samples	9
In_3_samples	6
In_3_samples	8
In_3_samples	7
In_3_samples	11
In_3_samples	10
In_3_samples	8
In_3_samples	9
In_3_samples	5
In_3_samples	5
In_3_samples	8
In_3_samples	10
In_3_samples	9
In_3_samples	8
In_3_samples	7
In_3_samples	10
In_3_samples	4
In_3_samples	6
In_3_samples	5
In_3_samples	7
In_3_samples	8
In_3_samples	7
In_3_samples	7
In_3_samples	13
In_3_samples	10
In_3_samples	12
In_3_samples	8
In_3_samples	6
[truncated: 7,001 more rows]
