# Supplementary material for: Upstream open reading frames buffer translational variability during Drosophila evolution and development
Source: eLife. 2025 Jun 6;14:RP104074. doi: 10.7554/eLife.104074 (PMC12143884; doi:10.7554/eLife.104074)
Supplement: Figure 2—source data 1. [file elife-104074-fig2-data1.xlsx]

## Sheet: Figure 2A
Sample	rho_TE_uORF	rho_TE_CDS
embryo 0-2h	0.561201	0.58823
embryo 2-6h	0.52434	0.660188
embryo 6-12h	0.523219	0.690242
embryo 12-24h	0.573396	0.727895
larva	0.508306	0.769533
pupa	0.552273	0.728023
female body	0.477552	0.64706
male body	0.492116	0.780637
female head	0.534296	0.806178
male head	0.527924	0.755142

## Sheet: Figure 2B
Samples	TE median
	Dm non-cons	Dm cons	Ds cons	Ds non-cons
female body	0.110608	0.148809	0.0488638	0.209167
larva	0	0.197799	0.157512	0.0975
pupa	0.201329	0.31818	0.158038	0.0666667
male body	0.172414	0.224405	0.185854	0.176667
embryo 2-6 h	0.274121	0.306146	0.201376	0.124126
embryo 0-2 h	0.0794002	0.115678	0.208035	0.131233
embryo 12-24 h	0.169222	0.248255	0.252	0.1709
male head	0.0790654	0.231884	0.265418	0
embryo 6-12 h	0.0412353	0.0928096	0.270943	0.123851
female head	0.081425	0.221549	0.294111	0

## Sheet: Figure 2C
Sample	Fraction of conserved uORFs
	Dominant	Other
embryo 0-2h	0.831107	0.776999
embryo 2-6h	0.819678	0.779786
larva	0.823985	0.781984
female body	0.821239	0.782812
male body	0.825049	0.787297
pupa	0.830812	0.788241
embryo 6-12h	0.822636	0.789074
female head	0.821532	0.790704
male head	0.827215	0.792614
embryo 12-24h	0.826309	0.796282

## Sheet: Figure 2D
Sample	Absolute values of the interspecific TE fold changes
	Dominant	Other
male head	0.638622	0.837844
embryo 0-2h	0.603961	0.889364
female head	0.728038	1.01332
embryo 12-24h	0.675122	1.01653
embryo 6-12h	0.688465	1.07415
pupa	1.09647	1.10472
male body	0.827814	1.17036
embryo 2-6h	1.02781	1.25
female body	0.847486	1.29193
larva	1.4364	1.51
