# Supplementary material for: Upstream open reading frames buffer translational variability during Drosophila evolution and development
Source: eLife. 2025 Jun 6;14:RP104074. doi: 10.7554/eLife.104074 (PMC12143884; doi:10.7554/eLife.104074)
Supplement: Figure 3—figure supplement 1—source data 1. [file elife-104074-fig3-figsupp1-data1.xlsx]

## Sheet: figS16
Stages	rho
embryo 0-2h	0.9
embryo 2-6h	0.93
embryo 6-12h	0.69
embryo 12-24h	0.88
larva	0.77
pupa	0.82
female body	0.91
male body	0.88
female head	0.72
male head	0.9
