# Supplementary material for: Upstream open reading frames buffer translational variability during Drosophila evolution and development
Source: eLife. 2025 Jun 6;14:RP104074. doi: 10.7554/eLife.104074 (PMC12143884; doi:10.7554/eLife.104074)
Supplement: Figure 3—figure supplement 3—source data 1. [file elife-104074-fig3-figsupp3-data1.xlsx]

## Sheet: figS18A
# all expressed uORFs
id	mel_mrna_cnt	mel_rpf_cnt	sim_mrna_cnt	sim_rpf_cnt	feature
FBtr0006151_1039	548.723	2.36931	336.057	9.17771	uORF
FBtr0006151_1048	405.584	2.36931	211.328	8.35994	uORF
FBtr0006151_1060	258.064	2.36931	113.501	6.7244	uORF
FBtr0070026_78	8.30297	6.47723	9.55985	6.7244	uORF
FBtr0070028_236	106.163	9.90049	80.4843	14.0843	uORF
FBtr0070028_388	44.8178	13.3238	35.2394	11.631	uORF
FBtr0070028_394	44.8178	12.6391	31.5709	6.7244	uORF
FBtr0070028_60	8.30297	2.36931	9.55985	8.35994	uORF
FBtr0070045_35	6.84237	5.10792	5.89134	3.45331	uORF
FBtr0070066_100	3.92119	1	2.22284	1	uORF
FBtr0070080_126	34.5937	3.05396	9.55985	1.81777	uORF
FBtr0070080_92	27.2907	16.0624	12.0055	14.9021	uORF
FBtr0070088_71	2.46059	1	3.44567	1	uORF
FBtr0070091_146	28.7513	15.3777	26.6795	38.6175	uORF
FBtr0070101_14	12.6847	3.73861	7.11418	1.81777	uORF
FBtr0070103_138	5.38178	2.36931	4.66851	10.8133	uORF
FBtr0070103_238	3.92119	10.5851	7.11418	10.8133	uORF
FBtr0070103_308	5.38178	4.42327	5.89134	4.27109	uORF
FBtr0070123_106	11.2242	3.05396	3.44567	2.63554	uORF
FBtr0070139_87	6.84237	3.05396	2.22284	1.81777	uORF
FBtr0070140_116	100.32	12.6391	24.2339	11.631	uORF
FBtr0070146_208	11.2242	3.73861	5.89134	7.54217	uORF
FBtr0070146_242	22.9089	3.73861	9.55985	5.08886	uORF
FBtr0070146_36	5.38178	2.36931	4.66851	1	uORF
FBtr0070146_470	24.3695	9.90049	26.6795	9.17771	uORF
FBtr0070151_241	31.6725	7.84653	26.6795	4.27109	uORF
FBtr0070151_247	31.6725	5.79257	26.6795	4.27109	uORF
FBtr0070151_380	33.1331	19.4856	20.5654	11.631	uORF
FBtr0070151_429	113.466	29.0708	71.9245	48.4307	uORF
FBtr0070167_168	6.84237	1.68465	9.55985	1.81777	uORF
FBtr0070167_489	8.30297	3.05396	3.44567	1	uORF
FBtr0070176_49	12.6847	2.36931	12.0055	2.63554	uORF
FBtr0070176_57	21.4483	1.68465	18.1197	1	uORF
FBtr0070176_87	53.5814	9.90049	62.1418	10.8133	uORF
FBtr0070182_108	14.1453	8.53119	9.55985	13.2666	uORF
FBtr0070182_126	9.76356	5.10792	5.89134	4.27109	uORF
FBtr0070209_191	66.7267	1	26.6795	2.63554	uORF
FBtr0070209_247	15.6059	2.36931	10.7827	15.7199	uORF
FBtr0070209_97	24.3695	38.6559	15.674	27.9865	uORF
FBtr0070235_141	17.0665	5.10792	13.2284	1	uORF
FBtr0070235_248	55.042	6.47723	34.0166	4.27109	uORF
FBtr0070235_272	52.1208	5.10792	25.4567	4.27109	uORF
FBtr0070253_53	113.466	19.4856	93.9355	21.4443	uORF
FBtr0070259_271	63.8055	7.84653	47.4678	12.4488	uORF
FBtr0070260_18	11.2242	7.84653	2.22284	18.1732	uORF
FBtr0070260_242	28.7513	18.801	38.9079	15.7199	uORF
FBtr0070260_46	5.38178	4.42327	2.22284	13.2666	uORF
FBtr0070270_124	36.0542	21.5396	18.1197	17.3554	uORF
FBtr0070270_210	43.3572	9.21584	35.2394	36.9819	uORF
FBtr0070270_246	33.1331	3.73861	29.1252	18.1732	uORF
FBtr0070270_264	33.1331	1.68465	27.9024	14.0843	uORF
FBtr0070270_270	31.6725	1.68465	24.2339	10.8133	uORF
FBtr0070277_216	36.0542	8.53119	25.4567	6.7244	uORF
FBtr0070277_377	11.2242	4.42327	14.4512	10.8133	uORF
FBtr0070277_388	11.2242	2.36931	13.2284	1.81777	uORF
FBtr0070279_122	5.38178	1	3.44567	1	uORF
FBtr0070279_203	25.8301	4.42327	14.4512	5.08886	uORF
FBtr0070279_291	9.76356	4.42327	13.2284	1.81777	uORF
FBtr0070283_121	79.872	5.79257	45.0221	28.8042	uORF
FBtr0070284_235	25.8301	3.73861	34.0166	1.81777	uORF
FBtr0070284_30	43.3572	11.9545	4.66851	5.08886	uORF
FBtr0070284_352	22.9089	1.68465	23.011	1.81777	uORF
FBtr0070284_387	3.92119	1	45.0221	4.27109	uORF
FBtr0070284_466	8.30297	1	15.674	1.81777	uORF
FBtr0070284_681	14.1453	1	8.33701	1	uORF
FBtr0070284_842	8.30297	1	7.11418	1.81777	uORF
FBtr0070284_92	47.739	10.5851	37.6851	9.17771	uORF
FBtr0070284_98	44.8178	9.90049	37.6851	9.17771	uORF
FBtr0070288_366	17.0665	1.68465	8.33701	2.63554	uORF
FBtr0070288_382	28.7513	6.47723	3.44567	1	uORF
FBtr0070289_74	56.5026	3.05396	57.2504	4.27109	uORF
FBtr0070289_81	50.6602	2.36931	58.4733	4.27109	uORF
FBtr0070293_347	65.2661	5.10792	130.621	19.8087	uORF
FBtr0070295_52	9.76356	1	15.674	1.81777	uORF
FBtr0070295_80	8.30297	1	16.8969	1	uORF
FBtr0070308_29	8.30297	29.7554	3.44567	18.991	uORF
FBtr0070313_203	5.38178	3.05396	2.22284	4.27109	uORF
FBtr0070313_88	6.84237	6.47723	3.44567	5.08886	uORF
FBtr0070314_28	6.84237	2.36931	4.66851	1	uORF
FBtr0070316_127	28.7513	34.548	21.7882	40.253	uORF
FBtr0070316_337	46.2784	20.8549	30.3481	40.253	uORF
FBtr0070316_97	40.436	39.3406	26.6795	68.875	uORF
FBtr0070317_223	46.2784	21.5396	53.5819	30.4398	uORF
FBtr0070317_286	27.2907	14.6931	42.5764	21.4443	uORF
FBtr0070317_84	18.5271	20.1703	20.5654	23.0798	uORF
FBtr0070318_30	14.1453	6.47723	9.55985	17.3554	uORF
FBtr0070330_112	2.46059	1	4.66851	1.81777	uORF
FBtr0070330_132	2.46059	1	4.66851	1	uORF
FBtr0070330_418	3.92119	1	5.89134	1	uORF
FBtr0070330_530	3.92119	1	3.44567	1	uORF
FBtr0070330_596	24.3695	28.3861	3.44567	1	uORF
FBtr0070330_657	14.1453	4.42327	8.33701	1	uORF
FBtr0070330_764	11.2242	28.3861	23.011	27.1687	uORF
FBtr0070340_107	40.436	3.05396	68.256	15.7199	uORF
FBtr0070340_130	21.4483	1	20.5654	1	uORF
FBtr0070340_305	56.5026	7.84653	58.4733	10.8133	uORF
FBtr0070340_329	47.739	6.47723	52.3591	8.35994	uORF
FBtr0070345_75	24.3695	8.53119	9.55985	9.17771	uORF
FBtr0070345_78	24.3695	7.84653	9.55985	8.35994	uORF
FBtr0070345_83	33.1331	7.16188	15.674	7.54217	uORF
FBtr0070346_158	30.2119	1	21.7882	4.27109	uORF
FBtr0070346_164	119.308	22.2242	126.952	70.5106	uORF
FBtr0070346_34	12.6847	7.16188	7.11418	18.991	uORF
FBtr0070355_127	5.38178	1	3.44567	1	uORF
FBtr0070355_159	3.92119	1	3.44567	1	uORF
FBtr0070355_184	2.46059	1	3.44567	1	uORF
FBtr0070363_49	9.76356	3.73861	4.66851	16.5377	uORF
FBtr0070379_348	38.9754	13.3238	21.7882	31.2575	uORF
FBtr0070379_381	37.5148	11.2698	21.7882	23.0798	uORF
FBtr0070379_547	6.84237	1	7.11418	2.63554	uORF
FBtr0070381_60	145.599	16.0624	68.256	20.6265	uORF
FBtr0070381_64	157.284	21.5396	76.8158	18.991	uORF
FBtr0070389_37	9.76356	5.79257	4.66851	7.54217	uORF
FBtr0070393_470	14.1453	8.53119	8.33701	9.99548	uORF
FBtr0070401_435	11.2242	5.79257	12.0055	9.17771	uORF
FBtr0070401_461	19.9877	7.84653	14.4512	8.35994	uORF
FBtr0070401_54	2.46059	1.68465	2.22284	2.63554	uORF
FBtr0070401_551	9.76356	3.05396	5.89134	2.63554	uORF
FBtr0070405_73	3.92119	4.42327	9.55985	15.7199	uORF
FBtr0070406_1332	8.30297	1	12.0055	1	uORF
FBtr0070406_419	22.9089	1	10.7827	10.8133	uORF
FBtr0070406_721	104.702	108.491	86.5985	81.9594	uORF
FBtr0070408_167	5.38178	1	7.11418	1.81777	uORF
FBtr0070412_190	84.2538	13.3238	68.256	14.9021	uORF
FBtr0070412_385	24.3695	7.84653	9.55985	32.8931	uORF
FBtr0070412_69	28.7513	7.84653	12.0055	32.0753	uORF
FBtr0070414_242	11.2242	1	9.55985	7.54217	uORF
FBtr0070414_350	24.3695	11.2698	23.011	12.4488	uORF
FBtr0070414_376	57.9631	7.16188	40.1307	7.54217	uORF
FBtr0070414_44	24.3695	15.3777	25.4567	27.9865	uORF
FBtr0070414_62	22.9089	8.53119	25.4567	20.6265	uORF
FBtr0070419_62	2.46059	1.68465	2.22284	5.90663	uORF
FBtr0070422_10	230.313	12.6391	254.127	30.4398	uORF
FBtr0070422_49	223.01	12.6391	254.127	29.622	uORF
FBtr0070429_305	8.30297	1.68465	5.89134	2.63554	uORF
FBtr0070429_308	3.92119	1	5.89134	2.63554	uORF
FBtr0070429_393	8.30297	5.10792	8.33701	4.27109	uORF
FBtr0070429_405	8.30297	3.73861	5.89134	4.27109	uORF
FBtr0070429_540	31.6725	38.6559	41.3536	81.1416	uORF
FBtr0070429_566	8.30297	3.05396	13.2284	2.63554	uORF
FBtr0070429_628	18.5271	25.6475	26.6795	49.2485	uORF
FBtr0070429_678	15.6059	7.16188	18.1197	5.08886	uORF
FBtr0070432_326	2.46059	1.68465	3.44567	1.81777	uORF
FBtr0070432_347	2.46059	1.68465	2.22284	1	uORF
FBtr0070432_372	2.46059	2.36931	2.22284	1.81777	uORF
FBtr0070432_388	2.46059	2.36931	2.22284	1.81777	uORF
FBtr0070432_451	2.46059	6.47723	3.44567	4.27109	uORF
FBtr0070432_67	3.92119	1	5.89134	1	uORF
FBtr0070439_1002	69.6479	19.4856	41.3536	15.7199	uORF
FBtr0070439_1007	177.732	32.494	114.724	22.2621	uORF
FBtr0070439_1041	202.562	17.4317	139.18	11.631	uORF
FBtr0070439_124	71.1085	4.42327	118.392	45.9774	uORF
FBtr0070439_135	57.9631	4.42327	48.6906	16.5377	uORF
FBtr0070439_607	71.1085	12.6391	40.1307	3.45331	uORF
FBtr0070439_993	74.0297	24.2782	43.7992	22.2621	uORF
FBtr0070442_271	38.9754	22.2242	8.33701	5.90663	uORF
FBtr0070442_294	3.92119	1	3.44567	1	uORF
FBtr0070442_320	34.5937	20.1703	20.5654	16.5377	uORF
FBtr0070445_96	14.1453	1.68465	4.66851	1	uORF
FBtr0070447_85	6.84237	5.10792	9.55985	10.8133	uORF
FBtr0070479_83	21.4483	23.5936	8.33701	22.2621	uORF
FBtr0070494_208	12.6847	3.05396	9.55985	10.8133	uORF
FBtr0070494_21	3.92119	1	2.22284	1.81777	uORF
FBtr0070494_217	11.2242	1	8.33701	1	uORF
FBtr0070494_80	2.46059	1.68465	2.22284	7.54217	uORF
FBtr0070494_90	2.46059	1.68465	3.44567	4.27109	uORF
FBtr0070495_118	2.46059	1	2.22284	1	uORF
FBtr0070495_92	6.84237	1	3.44567	2.63554	uORF
FBtr0070507_184	5.38178	3.05396	4.66851	1.81777	uORF
FBtr0070507_189	5.38178	1	7.11418	1	uORF
FBtr0070507_194	9.76356	10.5851	8.33701	12.4488	uORF
FBtr0070507_203	9.76356	10.5851	8.33701	12.4488	uORF
FBtr0070507_510	2.46059	9.90049	7.11418	14.9021	uORF
FBtr0070508_309	66.7267	45.5025	16.8969	19.8087	uORF
FBtr0070509_13	25.8301	5.10792	5.89134	4.27109	uORF
FBtr0070509_150	14.1453	4.42327	13.2284	9.99548	uORF
FBtr0070525_554	8.30297	31.8094	25.4567	109.764	uORF
FBtr0070527_25	2.46059	1	2.22284	1	uORF
FBtr0070559_1651	6.84237	4.42327	7.11418	2.63554	uORF
FBtr0070559_2169	8.30297	6.47723	4.66851	8.35994	uORF
FBtr0070562_334	2.46059	1	2.22284	1	uORF
FBtr0070568_35	9.76356	1.68465	12.0055	5.08886	uORF
FBtr0070569_40	3.92119	4.42327	5.89134	5.90663	uORF
FBtr0070575_172	3.92119	2.36931	3.44567	1	uORF
FBtr0070575_18	11.2242	2.36931	10.7827	1	uORF
FBtr0070575_181	3.92119	2.36931	3.44567	1	uORF
FBtr0070575_198	3.92119	2.36931	2.22284	11.631	uORF
FBtr0070575_260	8.30297	6.47723	13.2284	5.90663	uORF
FBtr0070575_402	19.9877	10.5851	9.55985	25.5331	uORF
FBtr0070575_419	5.38178	2.36931	15.674	21.4443	uORF
FBtr0070575_454	19.9877	11.9545	9.55985	5.08886	uORF
FBtr0070575_486	14.1453	3.05396	7.11418	3.45331	uORF
FBtr0070583_332	2.46059	1.68465	2.22284	1	uORF
FBtr0070583_398	2.46059	2.36931	2.22284	1	uORF
FBtr0070583_409	2.46059	1	2.22284	2.63554	uORF
FBtr0070586_88	2.46059	3.73861	4.66851	3.45331	uORF
FBtr0070599_189	233.234	1	82.93	1	uORF
FBtr0070611_44	74.0297	32.494	80.4843	63.1506	uORF
FBtr0070616_241	44.8178	6.47723	57.2504	111.399	uORF
FBtr0070625_303	28.7513	3.05396	30.3481	2.63554	uORF
FBtr0070625_31	9.76356	3.73861	3.44567	7.54217	uORF
FBtr0070625_85	9.76356	2.36931	3.44567	7.54217	uORF
FBtr0070626_335	18.5271	36.602	8.33701	31.2575	uORF
FBtr0070626_353	17.0665	34.548	8.33701	31.2575	uORF
FBtr0070626_380	17.0665	33.8634	8.33701	30.4398	uORF
FBtr0070627_129	3.92119	6.47723	5.89134	15.7199	uORF
FBtr0070627_135	2.46059	5.79257	5.89134	7.54217	uORF
FBtr0070643_166	8.30297	6.47723	3.44567	13.2666	uORF
FBtr0070643_293	27.2907	8.53119	14.4512	4.27109	uORF
FBtr0070643_549	14.1453	5.10792	5.89134	4.27109	uORF
FBtr0070643_576	9.76356	3.73861	4.66851	3.45331	uORF
FBtr0070643_58	3.92119	3.73861	5.89134	12.4488	uORF
FBtr0070650_568	52.1208	61.9341	41.3536	42.7063	uORF
FBtr0070650_679	163.126	46.8718	85.3757	38.6175	uORF
FBtr0070650_695	237.616	108.491	95.1583	197.265	uORF
FBtr0070650_763	76.9509	87.2663	46.2449	118.759	uORF
FBtr0070650_876	1178.24	393.991	448.558	382.081	uORF
FBtr0070652_125	11.2242	5.79257	8.33701	14.0843	uORF
FBtr0070668_152	3.92119	1	2.22284	1	uORF
FBtr0070668_197	3.92119	1	3.44567	1	uORF
FBtr0070668_410	3.92119	1	2.22284	1.81777	uORF
FBtr0070668_510	2.46059	1	2.22284	1.81777	uORF
FBtr0070671_129	18.5271	4.42327	15.674	6.7244	uORF
FBtr0070671_68	17.0665	14.6931	16.8969	27.9865	uORF
FBtr0070680_452	9.76356	3.05396	13.2284	3.45331	uORF
FBtr0070685_109	14.1453	3.05396	8.33701	5.90663	uORF
FBtr0070685_195	9.76356	3.73861	9.55985	5.90663	uORF
FBtr0070685_272	14.1453	9.21584	5.89134	10.8133	uORF
FBtr0070685_407	22.9089	15.3777	5.89134	26.3509	uORF
FBtr0070685_619	19.9877	7.16188	14.4512	5.90663	uORF
FBtr0070686_17	50.6602	11.2698	24.2339	19.8087	uORF
FBtr0070688_31	60.8843	12.6391	79.2615	17.3554	uORF
FBtr0070701_359	11.2242	1	10.7827	1	uORF
FBtr0070701_88	33.1331	43.4485	18.1197	36.1642	uORF
FBtr0070713_15	9.76356	3.05396	4.66851	4.27109	uORF
FBtr0070713_238	2.46059	1	2.22284	12.4488	uORF
FBtr0070713_258	6.84237	10.5851	2.22284	18.991	uORF
FBtr0070713_273	6.84237	6.47723	2.22284	14.0843	uORF
FBtr0070713_329	19.9877	9.21584	3.44567	24.7154	uORF
FBtr0070713_350	18.5271	3.05396	2.22284	13.2666	uORF
FBtr0070713_361	18.5271	1.68465	3.44567	1.81777	uORF
FBtr0070723_288	18.5271	12.6391	18.1197	16.5377	uORF
FBtr0070723_336	31.6725	3.73861	37.6851	6.7244	uORF
FBtr0070723_376	43.3572	16.747	38.9079	8.35994	uORF
FBtr0070723_433	28.7513	5.10792	21.7882	2.63554	uORF
FBtr0070724_123	21.4483	21.5396	10.7827	36.1642	uORF
FBtr0070724_144	12.6847	16.0624	7.11418	23.8976	uORF
FBtr0070724_150	11.2242	5.79257	7.11418	15.7199	uORF
FBtr0070724_168	14.1453	3.05396	21.7882	14.0843	uORF
FBtr0070724_174	14.1453	3.05396	20.5654	14.0843	uORF
FBtr0070724_195	11.2242	2.36931	18.1197	10.8133	uORF
FBtr0070724_41	6.84237	7.84653	5.89134	9.99548	uORF
FBtr0070724_57	14.1453	5.10792	8.33701	6.7244	uORF
FBtr0070738_28	3.92119	1	2.22284	1	uORF
FBtr0070738_622	5.38178	3.05396	9.55985	3.45331	uORF
FBtr0070742_280	15.6059	10.5851	19.3425	14.9021	uORF
FBtr0070742_290	21.4483	15.3777	16.8969	44.3419	uORF
FBtr0070742_513	3.92119	1	7.11418	1.81777	uORF
FBtr0070756_74	3.92119	1	3.44567	1	uORF
FBtr0070763_102	8.30297	7.16188	3.44567	2.63554	uORF
FBtr0070763_213	2.46059	1	2.22284	1	uORF
FBtr0070764_84	53.5814	33.8634	37.6851	82.7771	uORF
FBtr0070772_89	5.38178	2.36931	25.4567	28.8042	uORF
FBtr0070778_303	2.46059	1	9.55985	2.63554	uORF
FBtr0070778_375	8.30297	5.79257	14.4512	8.35994	uORF
FBtr0070778_431	18.5271	9.90049	18.1197	8.35994	uORF
FBtr0070780_35	17.0665	4.42327	8.33701	1	uORF
FBtr0070781_163	2.46059	1	5.89134	1	uORF
FBtr0070797_160	17.0665	2.36931	15.674	1	uORF
FBtr0070797_165	14.1453	1	15.674	1	uORF
FBtr0070804_460	41.8966	14.6931	26.6795	36.1642	uORF
FBtr0070827_15	11.2242	18.801	8.33701	9.17771	uORF
FBtr0070827_78	5.38178	14.0084	7.11418	5.08886	uORF
FBtr0070841_119	17.0665	4.42327	8.33701	3.45331	uORF
FBtr0070841_156	22.9089	1.68465	3.44567	1	uORF
FBtr0070841_284	12.6847	2.36931	3.44567	2.63554	uORF
FBtr0070843_127	17.0665	20.8549	14.4512	65.6039	uORF
FBtr0070865_201	5.38178	1	2.22284	2.63554	uORF
FBtr0070865_215	5.38178	1.68465	2.22284	1	uORF
FBtr0070872_212	2.46059	7.16188	4.66851	1.81777	uORF
FBtr0070872_325	27.2907	11.9545	5.89134	1.81777	uORF
FBtr0070874_120	33.1331	33.1787	15.674	14.0843	uORF
FBtr0070874_251	19.9877	1	13.2284	2.63554	uORF
FBtr0070874_268	24.3695	12.6391	24.2339	12.4488	uORF
FBtr0070877_18	43.3572	2.36931	8.33701	1.81777	uORF
FBtr0070890_13	5.38178	1	4.66851	1.81777	uORF
FBtr0070890_264	9.76356	1.68465	9.55985	2.63554	uORF
FBtr0070890_282	17.0665	1.68465	16.8969	3.45331	uORF
FBtr0070891_275	41.8966	4.42327	20.5654	6.7244	uORF
FBtr0070891_30	19.9877	3.73861	13.2284	7.54217	uORF
FBtr0070891_6	19.9877	4.42327	2.22284	5.90663	uORF
FBtr0070894_35	3.92119	2.36931	3.44567	1.81777	uORF
FBtr0070899_16	8.30297	1.68465	4.66851	1.81777	uORF
FBtr0070912_113	8.30297	3.05396	5.89134	5.08886	uORF
FBtr0070914_168	6.84237	11.2698	4.66851	1	uORF
FBtr0070914_353	15.6059	11.9545	12.0055	3.45331	uORF
FBtr0070914_359	14.1453	11.9545	10.7827	2.63554	uORF
FBtr0070914_365	12.6847	11.9545	9.55985	2.63554	uORF
FBtr0070914_371	11.2242	10.5851	8.33701	2.63554	uORF
FBtr0070914_377	11.2242	9.90049	7.11418	2.63554	uORF
FBtr0070914_71	6.84237	2.36931	4.66851	1.81777	uORF
FBtr0070918_47	3.92119	5.10792	3.44567	1.81777	uORF
FBtr0070918_66	2.46059	5.10792	3.44567	1	uORF
FBtr0070921_24	8.30297	2.36931	2.22284	7.54217	uORF
FBtr0070924_54	30.2119	5.10792	35.2394	13.2666	uORF
FBtr0070925_44	6.84237	2.36931	2.22284	1.81777	uORF
FBtr0070930_113	43.3572	1.68465	32.7937	2.63554	uORF
FBtr0070930_169	18.5271	2.36931	30.3481	3.45331	uORF
FBtr0070937_246	15.6059	6.47723	8.33701	1.81777	uORF
FBtr0070948_119	9.76356	17.4317	9.55985	14.0843	uORF
FBtr0070948_157	15.6059	38.6559	10.7827	39.4353	uORF
FBtr0070948_222	6.84237	2.36931	4.66851	2.63554	uORF
FBtr0070948_32	31.6725	84.5277	16.8969	14.0843	uORF
FBtr0070948_321	5.38178	7.16188	4.66851	9.99548	uORF
FBtr0070948_329	8.30297	11.9545	5.89134	13.2666	uORF
FBtr0070948_594	60.8843	59.8802	60.9189	45.1597	uORF
FBtr0070948_84	21.4483	60.5648	7.11418	7.54217	uORF
FBtr0070950_106	11.2242	2.36931	25.4567	5.08886	uORF
FBtr0070950_159	9.76356	1	31.5709	1	uORF
FBtr0070950_242	34.5937	8.53119	46.2449	42.7063	uORF
FBtr0070950_416	9.76356	1	45.0221	4.27109	uORF
FBtr0070955_31	90.0962	1	49.9134	1	uORF
FBtr0070956_490	164.586	50.295	98.8269	94.2259	uORF
FBtr0070959_1093	19.9877	7.84653	18.1197	15.7199	uORF
FBtr0070959_1102	17.0665	5.79257	18.1197	14.0843	uORF
FBtr0070959_396	9.76356	1.68465	7.11418	1.81777	uORF
FBtr0070959_417	9.76356	1.68465	7.11418	1.81777	uORF
FBtr0070959_47	15.6059	3.05396	13.2284	1	uORF
FBtr0070972_113	6.84237	3.05396	4.66851	1.81777	uORF
FBtr0070972_90	12.6847	6.47723	5.89134	10.8133	uORF
FBtr0070974_50	5.38178	2.36931	3.44567	4.27109	uORF
FBtr0070974_54	5.38178	2.36931	7.11418	4.27109	uORF
FBtr0070984_103	5.38178	3.73861	4.66851	18.1732	uORF
FBtr0070984_221	15.6059	9.90049	13.2284	18.1732	uORF
FBtr0070984_286	9.76356	3.73861	14.4512	26.3509	uORF
FBtr0070987_14	11.2242	7.84653	8.33701	11.631	uORF
FBtr0070988_110	62.3449	12.6391	49.9134	54.9729	uORF
FBtr0070988_159	27.2907	4.42327	15.674	41.0708	uORF
FBtr0070988_241	28.7513	11.2698	27.9024	24.7154	uORF
FBtr0070988_25	8.30297	5.79257	2.22284	12.4488	uORF
FBtr0070988_264	31.6725	10.5851	18.1197	9.99548	uORF
FBtr0070988_416	22.9089	1	15.674	1	uORF
FBtr0070988_436	5.38178	1.68465	14.4512	1.81777	uORF
FBtr0070988_45	9.76356	3.73861	2.22284	5.90663	uORF
FBtr0070988_518	21.4483	3.73861	14.4512	12.4488	uORF
FBtr0070988_541	19.9877	7.16188	9.55985	11.631	uORF
FBtr0070988_582	37.5148	27.0168	21.7882	33.7109	uORF
FBtr0070988_628	44.8178	16.0624	35.2394	24.7154	uORF
FBtr0070988_854	27.2907	1.68465	25.4567	3.45331	uORF
FBtr0070990_179	3.92119	1	3.44567	1	uORF
FBtr0070990_306	3.92119	1	3.44567	1	uORF
FBtr0070992_52	14.1453	1.68465	7.11418	9.17771	uORF
FBtr0070994_109	50.6602	11.9545	26.6795	9.99548	uORF
FBtr0071005_300	116.387	46.1871	53.5819	45.1597	uORF
FBtr0071007_71	22.9089	39.3406	16.8969	65.6039	uORF
FBtr0071013_103	36.0542	23.5936	37.6851	40.253	uORF
FBtr0071013_223	82.7932	97.5361	81.7072	78.6883	uORF
FBtr0071015_160	53.5814	9.21584	23.011	6.7244	uORF
FBtr0071015_43	25.8301	9.21584	21.7882	2.63554	uORF
FBtr0071017_200	6.84237	1.68465	3.44567	1.81777	uORF
FBtr0071017_83	2.46059	5.10792	4.66851	2.63554	uORF
FBtr0071020_66	78.4115	40.0252	71.9245	56.6085	uORF
FBtr0071036_313	47.739	16.0624	38.9079	27.9865	uORF
FBtr0071036_410	37.5148	79.0505	49.9134	535.005	uORF
FBtr0071036_501	215.707	94.1128	183.203	158.012	uORF
FBtr0071042_46	2.46059	1	3.44567	3.45331	uORF
FBtr0071042_51	11.2242	4.42327	12.0055	4.27109	uORF
FBtr0071042_78	8.30297	4.42327	4.66851	2.63554	uORF
FBtr0071048_270	8.30297	1	5.89134	1	uORF
FBtr0071048_331	5.38178	3.73861	8.33701	10.8133	uORF
FBtr0071048_49	9.76356	1	8.33701	1	uORF
FBtr0071049_160	6.84237	3.05396	2.22284	2.63554	uORF
FBtr0071049_198	3.92119	1	2.22284	1.81777	uORF
FBtr0071057_13	24.3695	2.36931	4.66851	3.45331	uORF
FBtr0071066_442	31.6725	4.42327	16.8969	5.08886	uORF
FBtr0071066_475	59.4237	11.2698	30.3481	8.35994	uORF
FBtr0071066_480	43.3572	9.90049	21.7882	6.7244	uORF
FBtr0071066_58	21.4483	2.36931	13.2284	5.90663	uORF
FBtr0071066_590	36.0542	1.68465	10.7827	2.63554	uORF
FBtr0071071_351	12.6847	3.73861	3.44567	5.90663	uORF
FBtr0071076_75	22.9089	15.3777	30.3481	23.0798	uORF
FBtr0071079_223	6.84237	1	8.33701	1	uORF
FBtr0071089_57	15.6059	1.68465	4.66851	1	uORF
FBtr0071092_100	22.9089	6.47723	12.0055	11.631	uORF
FBtr0071092_113	6.84237	1.68465	4.66851	1	uORF
FBtr0071092_300	12.6847	3.73861	7.11418	4.27109	uORF
FBtr0071092_668	17.0665	16.747	14.4512	28.8042	uORF
FBtr0071092_686	14.1453	14.0084	13.2284	23.8976	uORF
FBtr0071092_95	8.30297	1.68465	3.44567	1.81777	uORF
FBtr0071093_109	36.0542	7.16188	30.3481	12.4488	uORF
FBtr0071109_1024	36.0542	10.5851	21.7882	8.35994	uORF
FBtr0071109_106	2.46059	6.47723	2.22284	2.63554	uORF
FBtr0071109_135	2.46059	1	2.22284	7.54217	uORF
FBtr0071109_725	12.6847	5.79257	9.55985	6.7244	uORF
FBtr0071109_852	30.2119	7.84653	14.4512	10.8133	uORF
FBtr0071109_888	27.2907	5.10792	14.4512	4.27109	uORF
FBtr0071112_117	46.2784	31.1247	37.6851	32.8931	uORF
FBtr0071112_148	100.32	20.1703	93.9355	13.2666	uORF
FBtr0071112_335	199.641	24.2782	206.436	26.3509	uORF
FBtr0071112_393	56.5026	8.53119	58.4733	7.54217	uORF
FBtr0071112_8	9.76356	5.10792	9.55985	5.90663	uORF
FBtr0071117_165	3.92119	17.4317	4.66851	15.7199	uORF
FBtr0071125_20	27.2907	9.21584	14.4512	18.991	uORF
FBtr0071125_365	41.8966	1	37.6851	1.81777	uORF
FBtr0071125_395	31.6725	1	21.7882	2.63554	uORF
FBtr0071132_33	5.38178	1	9.55985	27.1687	uORF
FBtr0071132_409	8.30297	1	5.89134	5.90663	uORF
FBtr0071134_237	19.9877	17.4317	32.7937	14.0843	uORF
FBtr0071134_310	30.2119	16.747	45.0221	9.99548	uORF
FBtr0071134_326	21.4483	5.10792	35.2394	3.45331	uORF
FBtr0071134_378	34.5937	9.21584	68.256	8.35994	uORF
FBtr0071134_411	33.1331	7.84653	59.6961	4.27109	uORF
FBtr0071134_455	15.6059	2.36931	21.7882	1.81777	uORF
FBtr0071140_41	173.35	5.79257	89.0442	3.45331	uORF
FBtr0071151_55	5.38178	1	2.22284	1	uORF
FBtr0071152_97	3.92119	1	2.22284	1	uORF
FBtr0071153_69	8.30297	19.4856	10.7827	41.0708	uORF
FBtr0071153_76	11.2242	19.4856	10.7827	41.0708	uORF
FBtr0071170_151	9.76356	2.36931	8.33701	5.90663	uORF
FBtr0071170_159	9.76356	3.73861	14.4512	9.17771	uORF
FBtr0071170_595	22.9089	4.42327	24.2339	12.4488	uORF
FBtr0071174_328	2.46059	1.68465	5.89134	1	uORF
FBtr0071174_49	31.6725	8.53119	23.011	16.5377	uORF
FBtr0071174_80	15.6059	5.79257	18.1197	12.4488	uORF
FBtr0071174_89	14.1453	5.10792	18.1197	8.35994	uORF
FBtr0071175_155	14.1453	22.9089	16.8969	7.54217	uORF
FBtr0071175_285	22.9089	1	5.89134	1	uORF
FBtr0071176_130	2.46059	5.79257	3.44567	9.17771	uORF
FBtr0071176_82	2.46059	8.53119	5.89134	10.8133	uORF
FBtr0071183_31	24.3695	3.73861	12.0055	5.08886	uORF
FBtr0071183_4	24.3695	3.73861	12.0055	5.08886	uORF
FBtr0071188_48	8.30297	2.36931	3.44567	11.631	uORF
FBtr0071192_481	128.072	30.4401	80.4843	23.8976	uORF
FBtr0071193_314	5.38178	1	4.66851	13.2666	uORF
FBtr0071219_345	6.84237	12.6391	7.11418	26.3509	uORF
FBtr0071219_348	6.84237	1	7.11418	8.35994	uORF
FBtr0071221_98	12.6847	1.68465	10.7827	8.35994	uORF
FBtr0071222_137	66.7267	6.47723	46.2449	19.8087	uORF
FBtr0071222_168	43.3572	7.16188	27.9024	57.4262	uORF
FBtr0071222_192	24.3695	7.16188	19.3425	41.0708	uORF
FBtr0071223_126	3.92119	3.73861	2.22284	4.27109	uORF
FBtr0071223_83	5.38178	1.68465	3.44567	1.81777	uORF
FBtr0071224_9	3.92119	1	4.66851	3.45331	uORF
FBtr0071235_34	87.175	374.136	161.191	150.652	uORF
FBtr0071237_74	9.76356	1	2.22284	1	uORF
FBtr0071246_242	19.9877	3.73861	25.4567	7.54217	uORF
FBtr0071246_298	25.8301	1.68465	19.3425	4.27109	uORF
FBtr0071246_52	8.30297	2.36931	8.33701	3.45331	uORF
FBtr0071253_160	11.2242	10.5851	23.011	34.5286	uORF
FBtr0071279_449	6.84237	3.05396	14.4512	1.81777	uORF
FBtr0071284_41	2.46059	1	2.22284	9.17771	uORF
FBtr0071299_199	8.30297	7.84653	23.011	8.35994	uORF
FBtr0071300_44	6.84237	3.73861	12.0055	1.81777	uORF
FBtr0071314_236	19.9877	3.73861	38.9079	5.08886	uORF
FBtr0071320_105	9.76356	1.68465	10.7827	2.63554	uORF
FBtr0071332_70	5.38178	1	2.22284	1.81777	uORF
FBtr0071349_352	15.6059	5.10792	14.4512	6.7244	uORF
FBtr0071349_502	17.0665	11.9545	9.55985	13.2666	uORF
FBtr0071349_525	8.30297	1.68465	5.89134	1	uORF
FBtr0071361_136	160.205	16.747	148.963	24.7154	uORF
FBtr0071363_45	12.6847	9.21584	10.7827	29.622	uORF
FBtr0071363_52	11.2242	6.47723	9.55985	20.6265	uORF
FBtr0071367_240	2.46059	1.68465	2.22284	5.08886	uORF
FBtr0071367_247	2.46059	1	2.22284	4.27109	uORF
FBtr0071367_265	2.46059	1	2.22284	2.63554	uORF
FBtr0071368_37	3.92119	1.68465	4.66851	5.90663	uORF
FBtr0071371_8	3.92119	2.36931	2.22284	2.63554	uORF
FBtr0071393_27	74.0297	1	16.8969	19.8087	uORF
FBtr0071397_471	8.30297	3.05396	7.11418	1.81777	uORF
FBtr0071397_700	28.7513	1.68465	35.2394	3.45331	uORF
FBtr0071397_850	3.92119	1	4.66851	1	uORF
FBtr0071424_3	5773.27	35.9173	2619.09	60.6973	uORF
FBtr0071430_74	2.46059	1.68465	5.89134	8.35994	uORF
FBtr0071444_117	320.87	85.897	268.801	108.946	uORF
FBtr0071444_57	528.274	98.2208	459.563	144.11	uORF
FBtr0071450_305	11.2242	2.36931	2.22284	4.27109	uORF
FBtr0071460_312	2.46059	3.05396	8.33701	16.5377	uORF
FBtr0071460_52	9.76356	1.68465	41.3536	14.9021	uORF
FBtr0071460_575	18.5271	17.4317	20.5654	39.4353	uORF
FBtr0071487_34	19.9877	5.10792	8.33701	7.54217	uORF
FBtr0071487_363	93.0174	16.0624	75.593	14.0843	uORF
FBtr0071493_116	9.76356	3.05396	18.1197	6.7244	uORF
FBtr0071493_502	17.0665	5.79257	25.4567	20.6265	uORF
FBtr0071493_51	11.2242	1.68465	26.6795	7.54217	uORF
FBtr0071493_544	9.76356	3.05396	15.674	7.54217	uORF
FBtr0071497_78	21.4483	4.42327	2.22284	1	uORF
FBtr0071502_178	2.46059	1	2.22284	1.81777	uORF
FBtr0071503_16	18.5271	1	19.3425	1.81777	uORF
FBtr0071522_31	25.8301	5.10792	23.011	20.6265	uORF
FBtr0071526_55	2.46059	2.36931	2.22284	1.81777	uORF
FBtr0071546_266	24.3695	9.90049	25.4567	14.0843	uORF
FBtr0071546_504	15.6059	16.747	20.5654	16.5377	uORF
FBtr0071546_510	15.6059	14.6931	20.5654	16.5377	uORF
FBtr0071546_702	3.92119	3.05396	12.0055	1.81777	uORF
FBtr0071553_120	11.2242	10.5851	10.7827	27.1687	uORF
FBtr0071553_155	28.7513	20.8549	40.1307	20.6265	uORF
FBtr0071553_188	22.9089	9.90049	32.7937	12.4488	uORF
FBtr0071553_203	19.9877	3.05396	23.011	1	uORF
FBtr0071560_10	2.46059	1	3.44567	1	uORF
FBtr0071563_183	17.0665	3.73861	20.5654	1	uORF
FBtr0071563_190	28.7513	30.4401	32.7937	32.0753	uORF
FBtr0071563_203	27.2907	29.7554	32.7937	32.8931	uORF
FBtr0071563_329	49.1996	13.3238	42.5764	10.8133	uORF
FBtr0071567_95	122.229	208.45	98.8269	342.828	uORF
FBtr0071573_71	2.46059	1.68465	3.44567	6.7244	uORF
FBtr0071583_197	6.84237	7.16188	4.66851	5.08886	uORF
FBtr0071583_261	5.38178	16.747	8.33701	9.17771	uORF
FBtr0071590_125	3.92119	3.73861	2.22284	2.63554	uORF
FBtr0071590_61	3.92119	14.0084	4.66851	6.7244	uORF
FBtr0071606_165	6.84237	1.68465	2.22284	3.45331	uORF
FBtr0071609_55	11.2242	3.05396	13.2284	3.45331	uORF
FBtr0071609_61	11.2242	3.05396	13.2284	2.63554	uORF
FBtr0071610_264	3.92119	1	4.66851	1.81777	uORF
FBtr0071610_339	5.38178	1.68465	14.4512	1	uORF
FBtr0071610_429	19.9877	2.36931	14.4512	5.90663	uORF
FBtr0071610_508	8.30297	2.36931	8.33701	1.81777	uORF
FBtr0071610_562	2.46059	1	2.22284	1.81777	uORF
FBtr0071610_580	5.38178	4.42327	2.22284	3.45331	uORF
FBtr0071610_586	5.38178	3.73861	2.22284	3.45331	uORF
FBtr0071610_598	5.38178	3.73861	2.22284	3.45331	uORF
FBtr0071610_628	2.46059	2.36931	3.44567	1	uORF
FBtr0071610_758	18.5271	6.47723	16.8969	9.17771	uORF
FBtr0071610_841	12.6847	8.53119	18.1197	9.99548	uORF
FBtr0071610_856	11.2242	8.53119	14.4512	9.17771	uORF
FBtr0071613_125	30.2119	20.8549	25.4567	18.1732	uORF
FBtr0071613_26	12.6847	5.10792	8.33701	3.45331	uORF
FBtr0071613_76	11.2242	9.21584	16.8969	14.9021	uORF
FBtr0071615_132	11.2242	4.42327	2.22284	4.27109	uORF
FBtr0071615_88	6.84237	1	2.22284	1.81777	uORF
FBtr0071636_359	5.38178	1	4.66851	5.90663	uORF
FBtr0071636_371	6.84237	1.68465	4.66851	2.63554	uORF
FBtr0071636_538	14.1453	9.90049	9.55985	5.08886	uORF
FBtr0071636_544	14.1453	9.90049	9.55985	5.08886	uORF
FBtr0071636_607	11.2242	7.84653	4.66851	1.81777	uORF
FBtr0071636_738	6.84237	5.10792	3.44567	3.45331	uORF
FBtr0071636_749	6.84237	1	3.44567	1.81777	uORF
FBtr0071636_777	6.84237	3.73861	2.22284	2.63554	uORF
FBtr0071636_877	14.1453	6.47723	9.55985	4.27109	uORF
FBtr0071636_882	9.76356	5.79257	5.89134	1.81777	uORF
FBtr0071637_152	15.6059	1	9.55985	1	uORF
FBtr0071637_191	17.0665	6.47723	7.11418	6.7244	uORF
FBtr0071637_70	5.38178	1	2.22284	1	uORF
FBtr0071637_87	21.4483	4.42327	12.0055	4.27109	uORF
FBtr0071637_92	14.1453	4.42327	5.89134	3.45331	uORF
FBtr0071641_141	11.2242	26.3322	4.66851	49.2485	uORF
FBtr0071654_284	3.92119	3.05396	8.33701	3.45331	uORF
FBtr0071654_287	3.92119	3.05396	8.33701	2.63554	uORF
FBtr0071654_507	3.92119	1.68465	4.66851	5.08886	uORF
FBtr0071654_540	3.92119	1	3.44567	1.81777	uORF
FBtr0071654_642	2.46059	1	5.89134	2.63554	uORF
FBtr0071654_753	2.46059	1	5.89134	3.45331	uORF
FBtr0071654_850	5.38178	3.05396	3.44567	1.81777	uORF
FBtr0071661_169	180.653	11.2698	151.409	14.9021	uORF
FBtr0071661_221	52.1208	4.42327	41.3536	8.35994	uORF
FBtr0071661_232	62.3449	4.42327	42.5764	8.35994	uORF
FBtr0071661_99	50.6602	2.36931	30.3481	18.1732	uORF
FBtr0071663_7	2.46059	1.68465	2.22284	1	uORF
FBtr0071671_86	18.5271	16.0624	16.8969	10.8133	uORF
FBtr0071672_80	9.76356	3.05396	8.33701	6.7244	uORF
FBtr0071679_100	11.2242	3.73861	5.89134	5.08886	uORF
FBtr0071686_125	15.6059	29.0708	25.4567	18.1732	uORF
FBtr0071686_27	5.38178	1	9.55985	1	uORF
FBtr0071686_44	6.84237	4.42327	9.55985	4.27109	uORF
FBtr0071686_74	25.8301	33.8634	40.1307	23.0798	uORF
FBtr0071688_52	3.92119	1.68465	2.22284	4.27109	uORF
FBtr0071688_7	3.92119	1	2.22284	1	uORF
FBtr0071688_88	22.9089	1	8.33701	2.63554	uORF
FBtr0071755_183	37.5148	1	23.011	1.81777	uORF
FBtr0071755_73	25.8301	7.16188	19.3425	8.35994	uORF
FBtr0071756_31	24.3695	44.1332	13.2284	5.08886	uORF
FBtr0071758_18	9.76356	3.73861	3.44567	2.63554	uORF
FBtr0071758_6	9.76356	4.42327	3.44567	2.63554	uORF
FBtr0071763_366	3.92119	3.05396	3.44567	4.27109	uORF
FBtr0071774_147	27.2907	7.16188	26.6795	32.0753	uORF
FBtr0071774_255	11.2242	4.42327	27.9024	9.99548	uORF
FBtr0071774_259	15.6059	4.42327	36.4622	8.35994	uORF
FBtr0071774_48	6.84237	10.5851	14.4512	14.9021	uORF
FBtr0071775_285	17.0665	13.3238	10.7827	12.4488	uORF
FBtr0071775_294	14.1453	12.6391	10.7827	12.4488	uORF
FBtr0071775_297	12.6847	12.6391	9.55985	10.8133	uORF
FBtr0071775_31	5.38178	2.36931	4.66851	1.81777	uORF
FBtr0071775_639	3.92119	1.68465	15.674	1.81777	uORF
FBtr0071777_142	33.1331	44.1332	18.1197	19.8087	uORF
FBtr0071777_353	18.5271	20.1703	20.5654	5.90663	uORF
FBtr0071777_522	28.7513	7.84653	14.4512	5.90663	uORF
FBtr0071797_339	52.1208	7.16188	60.9189	42.7063	uORF
FBtr0071800_58	5.38178	20.1703	10.7827	73.7817	uORF
FBtr0071811_120	12.6847	11.2698	9.55985	9.17771	uORF
FBtr0071832_16	3.92119	1.68465	3.44567	2.63554	uORF
FBtr0071838_203	6.84237	6.47723	3.44567	2.63554	uORF
FBtr0071838_232	6.84237	3.05396	3.44567	1	uORF
FBtr0071838_248	9.76356	2.36931	5.89134	3.45331	uORF
FBtr0071838_389	3.92119	2.36931	7.11418	5.90663	uORF
FBtr0071838_491	8.30297	3.73861	7.11418	5.90663	uORF
FBtr0071843_5	2.46059	1	3.44567	1	uORF
FBtr0071845_126	82.7932	5.79257	48.6906	14.0843	uORF
FBtr0071845_29	47.739	3.05396	24.2339	3.45331	uORF
FBtr0071849_274	30.2119	14.6931	19.3425	9.17771	uORF
FBtr0071849_278	30.2119	16.0624	21.7882	5.90663	uORF
FBtr0071868_1	15.6059	7.84653	9.55985	14.9021	uORF
FBtr0071868_7	15.6059	7.84653	9.55985	14.9021	uORF
FBtr0071868_89	33.1331	8.53119	24.2339	23.8976	uORF
FBtr0071898_201	12.6847	11.2698	4.66851	5.08886	uORF
FBtr0071898_207	11.2242	10.5851	4.66851	5.08886	uORF
FBtr0071898_91	6.84237	2.36931	14.4512	3.45331	uORF
FBtr0071899_144	12.6847	3.73861	21.7882	13.2666	uORF
FBtr0071899_154	18.5271	9.90049	19.3425	9.17771	uORF
FBtr0071899_222	30.2119	10.5851	23.011	9.99548	uORF
FBtr0071899_273	24.3695	3.05396	20.5654	4.27109	uORF
FBtr0071899_391	18.5271	3.05396	10.7827	1	uORF
FBtr0071899_406	17.0665	3.05396	8.33701	1	uORF
FBtr0071899_428	28.7513	4.42327	10.7827	3.45331	uORF
FBtr0071907_47	3.92119	13.3238	7.11418	17.3554	uORF
FBtr0071922_114	11.2242	3.73861	5.89134	7.54217	uORF
FBtr0071934_48	3.92119	1.68465	8.33701	4.27109	uORF
FBtr0071936_100	17.0665	18.801	12.0055	23.8976	uORF
FBtr0071951_138	5.38178	1	3.44567	1	uORF
FBtr0072010_145	5.38178	1	2.22284	1.81777	uORF
FBtr0072010_18	2.46059	1	2.22284	1.81777	uORF
FBtr0072010_92	3.92119	4.42327	3.44567	6.7244	uORF
FBtr0072012_1	5.38178	1.68465	3.44567	1.81777	uORF
FBtr0072027_150	2.46059	1.68465	3.44567	1.81777	uORF
FBtr0072027_155	2.46059	1.68465	2.22284	1.81777	uORF
FBtr0072036_53	14.1453	3.05396	8.33701	5.08886	uORF
FBtr0072038_169	11.2242	1.68465	9.55985	1.81777	uORF
FBtr0072058_115	6.84237	2.36931	8.33701	1	uORF
FBtr0072058_193	3.92119	2.36931	9.55985	1.81777	uORF
FBtr0072058_322	5.38178	1	2.22284	1	uORF
FBtr0072058_36	5.38178	1.68465	4.66851	2.63554	uORF
FBtr0072065_45	2.46059	1	7.11418	1	uORF
FBtr0072073_249	18.5271	3.73861	9.55985	5.08886	uORF
FBtr0072073_370	8.30297	1.68465	7.11418	9.17771	uORF
FBtr0072073_387	11.2242	1	8.33701	5.90663	uORF
FBtr0072073_66	21.4483	6.47723	12.0055	12.4488	uORF
FBtr0072073_99	28.7513	12.6391	14.4512	13.2666	uORF
FBtr0072084_45	12.6847	3.05396	5.89134	9.99548	uORF
FBtr0072085_67	2.46059	1.68465	7.11418	1.81777	uORF
FBtr0072087_379	49.1996	3.73861	36.4622	17.3554	uORF
FBtr0072087_423	52.1208	5.79257	26.6795	23.8976	uORF
FBtr0072087_517	274.131	324.156	213.773	150.652	uORF
FBtr0072087_561	60.8843	11.2698	71.9245	9.99548	uORF
FBtr0072097_145	18.5271	2.36931	23.011	2.63554	uORF
FBtr0072097_85	5.38178	1	12.0055	2.63554	uORF
FBtr0072099_107	2.46059	1	3.44567	1	uORF
FBtr0072117_124	22.9089	16.0624	15.674	5.08886	uORF
FBtr0072120_316	17.0665	9.21584	7.11418	9.99548	uORF
FBtr0072127_102	33.1331	25.6475	14.4512	50.0663	uORF
FBtr0072129_263	3.92119	1.68465	8.33701	6.7244	uORF
FBtr0072129_449	9.76356	7.84653	7.11418	9.99548	uORF
FBtr0072129_456	19.9877	9.21584	18.1197	7.54217	uORF
FBtr0072129_497	19.9877	3.73861	13.2284	1.81777	uORF
FBtr0072131_21	151.441	29.0708	81.7072	41.0708	uORF
FBtr0072140_51	3.92119	1	4.66851	1	uORF
FBtr0072143_261	138.296	4.42327	115.947	9.99548	uORF
FBtr0072143_271	79.872	2.36931	74.3701	3.45331	uORF
FBtr0072145_140	2.46059	2.36931	7.11418	14.0843	uORF
FBtr0072145_147	2.46059	1	3.44567	2.63554	uORF
FBtr0072145_176	2.46059	2.36931	7.11418	13.2666	uORF
FBtr0072154_111	8.30297	9.21584	13.2284	18.991	uORF
FBtr0072154_143	24.3695	3.73861	29.1252	5.90663	uORF
FBtr0072154_192	28.7513	3.05396	27.9024	1.81777	uORF
FBtr0072154_54	2.46059	3.05396	4.66851	21.4443	uORF
FBtr0072156_43	5.38178	3.05396	3.44567	1.81777	uORF
FBtr0072157_1018	44.8178	22.2242	31.5709	5.90663	uORF
FBtr0072157_1081	31.6725	5.79257	21.7882	5.08886	uORF
FBtr0072157_155	21.4483	7.84653	24.2339	1.81777	uORF
FBtr0072157_305	5.38178	1.68465	7.11418	2.63554	uORF
FBtr0072157_512	27.2907	5.79257	21.7882	12.4488	uORF
FBtr0072157_560	8.30297	3.05396	3.44567	5.90663	uORF
FBtr0072157_651	72.5691	7.84653	31.5709	9.99548	uORF
FBtr0072157_837	24.3695	14.0084	14.4512	17.3554	uORF
FBtr0072160_13	14.1453	3.73861	7.11418	4.27109	uORF
FBtr0072162_165	75.4903	14.6931	65.8103	21.4443	uORF
FBtr0072162_177	74.0297	11.9545	58.4733	20.6265	uORF
FBtr0072162_98	55.042	282.392	59.6961	449.956	uORF
FBtr0072163_64	71.1085	62.6188	25.4567	37.7997	uORF
FBtr0072166_127	6.84237	1.68465	5.89134	1	uORF
FBtr0072166_166	17.0665	1.68465	7.11418	2.63554	uORF
FBtr0072166_47	11.2242	22.2242	4.66851	18.991	uORF
FBtr0072166_80	11.2242	19.4856	4.66851	15.7199	uORF
FBtr0072168_56	2.46059	2.36931	2.22284	2.63554	uORF
FBtr0072177_139	63.8055	44.8178	40.1307	50.0663	uORF
FBtr0072177_243	57.9631	17.4317	27.9024	52.5196	uORF
FBtr0072195_126	21.4483	14.0084	25.4567	15.7199	uORF
FBtr0072195_76	50.6602	56.4569	43.7992	63.9684	uORF
FBtr0072195_81	28.7513	48.9257	32.7937	55.7907	uORF
FBtr0072204_169	133.914	118.76	119.615	369.815	uORF
FBtr0072204_199	85.7144	88.6356	71.9245	287.22	uORF
FBtr0072204_245	60.8843	21.5396	54.8048	95.8615	uORF
FBtr0072204_279	100.32	69.4653	87.8213	83.5949	uORF
FBtr0072204_306	72.5691	52.349	67.0331	59.0618	uORF
FBtr0072204_36	98.8598	328.264	79.2615	297.851	uORF
FBtr0072207_141	14.1453	1	12.0055	1.81777	uORF
FBtr0072207_33	8.30297	11.9545	13.2284	12.4488	uORF
FBtr0072207_62	15.6059	11.9545	16.8969	14.0843	uORF
FBtr0072210_18	5.38178	3.05396	2.22284	1.81777	uORF
FBtr0072220_24	9.76356	13.3238	3.44567	8.35994	uORF
FBtr0072220_27	9.76356	11.2698	3.44567	4.27109	uORF
FBtr0072220_62	9.76356	1.68465	3.44567	1.81777	uORF
FBtr0072221_159	5.38178	1	3.44567	2.63554	uORF
FBtr0072225_60	2.46059	3.73861	2.22284	2.63554	uORF
FBtr0072227_145	52.1208	14.6931	20.5654	37.7997	uORF
FBtr0072227_242	14.1453	13.3238	13.2284	35.3464	uORF
FBtr0072227_272	27.2907	11.9545	27.9024	20.6265	uORF
FBtr0072234_116	72.5691	14.0084	32.7937	18.1732	uORF
FBtr0072235_26	25.8301	3.05396	14.4512	3.45331	uORF
FBtr0072235_32	25.8301	3.05396	14.4512	3.45331	uORF
FBtr0072239_103	36.0542	11.2698	37.6851	25.5331	uORF
FBtr0072239_141	21.4483	1.68465	35.2394	13.2666	uORF
FBtr0072239_17	11.2242	9.21584	9.55985	12.4488	uORF
FBtr0072239_22	47.739	8.53119	36.4622	25.5331	uORF
FBtr0072247_110	12.6847	7.84653	7.11418	6.7244	uORF
FBtr0072247_127	3.92119	2.36931	3.44567	2.63554	uORF
FBtr0072247_155	9.76356	3.05396	3.44567	1	uORF
FBtr0072247_179	11.2242	1.68465	4.66851	1.81777	uORF
FBtr0072247_205	6.84237	3.05396	3.44567	2.63554	uORF
FBtr0072247_213	5.38178	1.68465	4.66851	1.81777	uORF
FBtr0072247_31	3.92119	7.16188	3.44567	1.81777	uORF
FBtr0072250_58	8.30297	7.84653	7.11418	9.99548	uORF
FBtr0072250_68	8.30297	3.73861	5.89134	7.54217	uORF
FBtr0072251_146	15.6059	35.2327	19.3425	45.1597	uORF
FBtr0072251_149	15.6059	35.2327	19.3425	45.1597	uORF
FBtr0072251_246	12.6847	9.21584	12.0055	11.631	uORF
FBtr0072252_219	66.7267	18.801	71.9245	39.4353	uORF
FBtr0072252_81	84.2538	69.4653	113.501	69.6928	uORF
FBtr0072255_9	3.92119	1	7.11418	1	uORF
FBtr0072257_233	24.3695	18.801	24.2339	8.35994	uORF
FBtr0072257_254	15.6059	4.42327	8.33701	4.27109	uORF
FBtr0072260_212	2.46059	1.68465	8.33701	1	uORF
FBtr0072260_220	5.38178	1	9.55985	1	uORF
FBtr0072260_268	5.38178	1	3.44567	1.81777	uORF
FBtr0072262_187	37.5148	7.84653	21.7882	9.17771	uORF
FBtr0072263_230	6.84237	1.68465	8.33701	6.7244	uORF
FBtr0072263_262	5.38178	1.68465	4.66851	2.63554	uORF
FBtr0072268_75	2.46059	1.68465	9.55985	9.99548	uORF
FBtr0072281_196	12.6847	1.68465	5.89134	1	uORF
FBtr0072281_510	18.5271	3.73861	12.0055	1	uORF
FBtr0072281_518	30.2119	11.9545	18.1197	15.7199	uORF
FBtr0072281_574	11.2242	1	5.89134	1.81777	uORF
FBtr0072285_209	3.92119	6.47723	2.22284	5.08886	uORF
FBtr0072287_81	15.6059	21.5396	5.89134	29.622	uORF
FBtr0072289_120	3.92119	1	4.66851	1	uORF
FBtr0072289_146	14.1453	1	4.66851	1	uORF
FBtr0072302_13	3.92119	7.16188	2.22284	3.45331	uORF
FBtr0072302_61	3.92119	5.10792	2.22284	2.63554	uORF
FBtr0072312_132	34.5937	7.84653	30.3481	11.631	uORF
FBtr0072312_232	30.2119	48.2411	16.8969	76.235	uORF
FBtr0072336_44	37.5148	2.36931	36.4622	3.45331	uORF
FBtr0072336_51	36.0542	1.68465	32.7937	2.63554	uORF
FBtr0072336_670	3.92119	1	7.11418	1	uORF
FBtr0072338_81	5.38178	1	3.44567	1	uORF
FBtr0072342_43	5.38178	3.73861	9.55985	10.8133	uORF
FBtr0072347_26	11.2242	1.68465	4.66851	1	uORF
FBtr0072362_186	12.6847	10.5851	7.11418	7.54217	uORF
FBtr0072362_206	12.6847	5.10792	8.33701	6.7244	uORF
FBtr0072362_46	12.6847	7.16188	8.33701	5.08886	uORF
FBtr0072364_317	27.2907	39.3406	15.674	38.6175	uORF
FBtr0072364_9	36.0542	11.9545	35.2394	14.0843	uORF
FBtr0072368_213	28.7513	21.5396	26.6795	51.7018	uORF
FBtr0072368_220	15.6059	7.16188	8.33701	8.35994	uORF
FBtr0072368_302	6.84237	8.53119	10.7827	12.4488	uORF
FBtr0072368_397	68.1873	35.2327	86.5985	23.8976	uORF
FBtr0072368_448	63.8055	30.4401	79.2615	19.8087	uORF
FBtr0072368_586	24.3695	11.9545	34.0166	9.99548	uORF
FBtr0072368_714	22.9089	5.10792	19.3425	2.63554	uORF
FBtr0072368_759	12.6847	3.05396	15.674	1	uORF
FBtr0072368_9	33.1331	7.84653	24.2339	10.8133	uORF
FBtr0072369_207	6.84237	2.36931	10.7827	1.81777	uORF
FBtr0072369_454	9.76356	5.10792	12.0055	4.27109	uORF
FBtr0072375_65	2.46059	1.68465	5.89134	1	uORF
FBtr0072393_32	5.38178	1	3.44567	2.63554	uORF
FBtr0072393_498	3.92119	1	4.66851	1	uORF
FBtr0072396_1064	22.9089	4.42327	24.2339	6.7244	uORF
FBtr0072396_221	6.84237	1	7.11418	1	uORF
FBtr0072396_778	30.2119	6.47723	20.5654	24.7154	uORF
FBtr0072397_153	37.5148	20.8549	37.6851	94.2259	uORF
FBtr0072397_44	40.436	23.5936	34.0166	72.1461	uORF
FBtr0072405_13	336.937	7.16188	144.072	9.17771	uORF
FBtr0072410_79	3.92119	1	2.22284	1	uORF
FBtr0072412_10	12.6847	1.68465	2.22284	1	uORF
FBtr0072423_243	2.46059	4.42327	2.22284	1	uORF
FBtr0072427_170	97.3992	12.6391	69.4788	63.1506	uORF
FBtr0072435_91	43.3572	17.4317	46.2449	50.0663	uORF
FBtr0072441_100	11.2242	1	5.89134	1	uORF
FBtr0072441_140	15.6059	1.68465	13.2284	5.90663	uORF
FBtr0072441_319	9.76356	1	3.44567	1.81777	uORF
FBtr0072441_330	15.6059	2.36931	7.11418	10.8133	uORF
FBtr0072441_348	14.1453	2.36931	4.66851	9.99548	uORF
FBtr0072441_387	12.6847	1	4.66851	1	uORF
FBtr0072441_674	6.84237	1	2.22284	1	uORF
FBtr0072464_263	24.3695	14.6931	15.674	34.5286	uORF
FBtr0072464_274	28.7513	20.8549	24.2339	57.4262	uORF
FBtr0072476_155	2.46059	1	4.66851	7.54217	uORF
FBtr0072480_93	3.92119	1	2.22284	1	uORF
FBtr0072515_146	9.76356	11.2698	4.66851	4.27109	uORF
FBtr0072515_194	18.5271	11.9545	15.674	15.7199	uORF
FBtr0072515_218	15.6059	8.53119	13.2284	12.4488	uORF
FBtr0072515_244	11.2242	3.73861	10.7827	1	uORF
FBtr0072515_258	17.0665	3.73861	16.8969	4.27109	uORF
FBtr0072515_303	19.9877	19.4856	19.3425	25.5331	uORF
FBtr0072515_343	8.30297	10.5851	12.0055	12.4488	uORF
FBtr0072520_147	12.6847	5.79257	3.44567	8.35994	uORF
FBtr0072520_170	9.76356	2.36931	2.22284	4.27109	uORF
FBtr0072520_186	11.2242	2.36931	5.89134	2.63554	uORF
FBtr0072524_181	3.92119	3.05396	2.22284	1	uORF
FBtr0072529_101	6.84237	3.73861	7.11418	14.9021	uORF
FBtr0072532_515	21.4483	33.8634	9.55985	29.622	uORF
FBtr0072532_622	12.6847	3.05396	4.66851	1.81777	uORF
FBtr0072532_68	3.92119	1	2.22284	1	uORF
FBtr0072534_148	8.30297	1	23.011	3.45331	uORF
FBtr0072548_73	9.76356	3.05396	3.44567	6.7244	uORF
FBtr0072548_88	8.30297	3.05396	3.44567	1	uORF
FBtr0072551_150	9.76356	4.42327	3.44567	8.35994	uORF
FBtr0072551_207	6.84237	1.68465	3.44567	4.27109	uORF
FBtr0072551_455	25.8301	20.1703	20.5654	25.5331	uORF
FBtr0072551_508	12.6847	1	14.4512	1	uORF
FBtr0072556_15	17.0665	3.05396	14.4512	1	uORF
FBtr0072556_266	147.059	40.7099	145.295	187.452	uORF
FBtr0072556_270	231.774	30.4401	235.784	87.6838	uORF
FBtr0072556_50	18.5271	5.10792	15.674	5.90663	uORF
FBtr0072556_9	17.0665	5.79257	14.4512	1.81777	uORF
FBtr0072559_7	11.2242	2.36931	3.44567	5.90663	uORF
FBtr0072562_297	12.6847	6.47723	13.2284	18.1732	uORF
FBtr0072562_470	9.76356	3.05396	13.2284	4.27109	uORF
FBtr0072563_177	11.2242	1	9.55985	1.81777	uORF
FBtr0072563_48	19.9877	2.36931	19.3425	3.45331	uORF
FBtr0072574_111	12.6847	1	5.89134	4.27109	uORF
FBtr0072574_117	12.6847	1	5.89134	4.27109	uORF
FBtr0072585_112	2.46059	1	2.22284	1	uORF
FBtr0072585_147	2.46059	1	2.22284	1	uORF
FBtr0072585_95	2.46059	1	2.22284	1.81777	uORF
FBtr0072587_43	8.30297	6.47723	4.66851	5.08886	uORF
FBtr0072589_291	2.46059	5.10792	4.66851	6.7244	uORF
FBtr0072589_351	6.84237	15.3777	7.11418	13.2666	uORF
FBtr0072593_223	27.2907	24.9629	27.9024	99.1326	uORF
FBtr0072593_234	47.739	16.0624	36.4622	80.3238	uORF
FBtr0072593_821	8.30297	3.73861	7.11418	14.9021	uORF
FBtr0072594_120	37.5148	8.53119	31.5709	9.99548	uORF
FBtr0072594_172	19.9877	3.73861	10.7827	4.27109	uORF
FBtr0072594_176	47.739	13.3238	18.1197	2.63554	uORF
FBtr0072594_199	34.5937	11.9545	26.6795	9.17771	uORF
FBtr0072594_319	15.6059	3.73861	19.3425	8.35994	uORF
FBtr0072594_332	14.1453	4.42327	24.2339	10.8133	uORF
FBtr0072594_367	8.30297	1	18.1197	10.8133	uORF
FBtr0072594_401	2.46059	1	5.89134	6.7244	uORF
FBtr0072594_468	22.9089	5.10792	21.7882	6.7244	uORF
FBtr0072594_542	11.2242	3.05396	3.44567	4.27109	uORF
FBtr0072594_60	19.9877	3.73861	30.3481	11.631	uORF
FBtr0072596_7	5.38178	9.21584	8.33701	9.99548	uORF
FBtr0072597_33	6.84237	2.36931	12.0055	1.81777	uORF
FBtr0072597_41	12.6847	12.6391	19.3425	5.90663	uORF
FBtr0072597_95	17.0665	1	13.2284	5.08886	uORF
FBtr0072602_187	3.92119	5.10792	3.44567	9.99548	uORF
FBtr0072606_82	2.46059	1	3.44567	1	uORF
FBtr0072606_85	2.46059	1	3.44567	1	uORF
FBtr0072606_88	2.46059	1	3.44567	1	uORF
FBtr0072607_22	3.92119	3.05396	3.44567	5.90663	uORF
FBtr0072607_44	3.92119	2.36931	5.89134	13.2666	uORF
FBtr0072610_13	37.5148	2.36931	24.2339	5.90663	uORF
FBtr0072611_2	2.46059	3.05396	2.22284	1	uORF
FBtr0072611_204	17.0665	11.2698	15.674	18.991	uORF
FBtr0072611_247	6.84237	3.05396	5.89134	3.45331	uORF
FBtr0072619_29	8.30297	4.42327	2.22284	3.45331	uORF
FBtr0072619_57	3.92119	1.68465	2.22284	1	uORF
FBtr0072627_67	19.9877	3.73861	25.4567	5.90663	uORF
FBtr0072639_178	18.5271	11.2698	9.55985	23.8976	uORF
FBtr0072639_187	18.5271	4.42327	9.55985	5.08886	uORF
FBtr0072639_340	3.92119	1	5.89134	2.63554	uORF
FBtr0072642_168	3.92119	1	5.89134	1	uORF
FBtr0072642_286	6.84237	1	4.66851	1.81777	uORF
FBtr0072642_292	5.38178	1	4.66851	1	uORF
FBtr0072642_338	2.46059	1	2.22284	1	uORF
FBtr0072642_358	2.46059	3.73861	3.44567	1.81777	uORF
FBtr0072644_127	8.30297	38.6559	15.674	44.3419	uORF
FBtr0072644_133	6.84237	35.9173	12.0055	37.7997	uORF
FBtr0072644_160	6.84237	23.5936	4.66851	18.991	uORF
FBtr0072644_236	9.76356	3.05396	10.7827	7.54217	uORF
FBtr0072644_66	6.84237	8.53119	7.11418	10.8133	uORF
FBtr0072652_48	55.042	5.79257	19.3425	19.8087	uORF
FBtr0072659_126	2.46059	1	8.33701	1.81777	uORF
FBtr0072659_97	6.84237	2.36931	8.33701	1.81777	uORF
FBtr0072679_125	38.9754	7.84653	30.3481	36.1642	uORF
FBtr0072681_214	5.38178	5.10792	3.44567	2.63554	uORF
FBtr0072681_296	3.92119	1	7.11418	1	uORF
FBtr0072694_198	14.1453	3.73861	12.0055	21.4443	uORF
FBtr0072694_237	9.76356	1.68465	8.33701	16.5377	uORF
FBtr0072703_60	9.76356	14.6931	3.44567	18.1732	uORF
FBtr0072703_66	9.76356	13.3238	3.44567	17.3554	uORF
FBtr0072703_74	11.2242	5.79257	5.89134	7.54217	uORF
FBtr0072711_59	14.1453	13.3238	4.66851	18.1732	uORF
FBtr0072723_168	2.46059	1	2.22284	1.81777	uORF
FBtr0072729_109	6.84237	4.42327	2.22284	4.27109	uORF
FBtr0072729_24	3.92119	9.21584	5.89134	5.90663	uORF
FBtr0072729_31	3.92119	8.53119	5.89134	1.81777	uORF
FBtr0072735_168	47.739	38.6559	38.9079	41.8886	uORF
FBtr0072735_201	30.2119	15.3777	19.3425	17.3554	uORF
FBtr0072735_224	15.6059	5.79257	19.3425	5.90663	uORF
FBtr0072742_294	12.6847	1.68465	8.33701	1	uORF
FBtr0072742_315	11.2242	1	8.33701	1	uORF
FBtr0072742_95	11.2242	1	2.22284	1	uORF
FBtr0072743_358	2.46059	1.68465	2.22284	1.81777	uORF
FBtr0072743_475	9.76356	5.79257	3.44567	2.63554	uORF
FBtr0072747_111	28.7513	3.73861	75.593	103.221	uORF
FBtr0072747_1125	38.9754	7.84653	27.9024	3.45331	uORF
FBtr0072747_1279	28.7513	3.73861	40.1307	7.54217	uORF
FBtr0072747_316	24.3695	11.2698	12.0055	89.3193	uORF
FBtr0072747_322	21.4483	4.42327	12.0055	63.9684	uORF
FBtr0072747_836	49.1996	18.801	27.9024	35.3464	uORF
FBtr0072747_883	15.6059	1.68465	16.8969	12.4488	uORF
FBtr0072754_3	8.30297	1	2.22284	1	uORF
FBtr0072754_9	8.30297	1	2.22284	1	uORF
FBtr0072757_3	8.30297	1	2.22284	1	uORF
FBtr0072757_9	8.30297	1	2.22284	1	uORF
FBtr0072759_48	2.46059	4.42327	3.44567	5.90663	uORF
FBtr0072761_42	33.1331	1.68465	30.3481	1.81777	uORF
FBtr0072767_121	2.46059	1	3.44567	1.81777	uORF
FBtr0072767_128	6.84237	1.68465	3.44567	1	uORF
FBtr0072767_186	5.38178	1	2.22284	1	uORF
FBtr0072767_85	2.46059	7.16188	4.66851	5.90663	uORF
FBtr0072776_22	5.38178	1	8.33701	1	uORF
FBtr0072779_29	14.1453	2.36931	9.55985	7.54217	uORF
FBtr0072784_22	95.9386	11.9545	14.4512	9.17771	uORF
FBtr0072784_34	95.9386	9.21584	14.4512	5.90663	uORF
FBtr0072788_68	6.84237	3.05396	2.22284	5.08886	uORF
FBtr0072792_104	15.6059	14.0084	9.55985	8.35994	uORF
FBtr0072792_139	33.1331	14.6931	35.2394	19.8087	uORF
FBtr0072792_312	27.2907	2.36931	20.5654	6.7244	uORF
FBtr0072792_96	25.8301	29.7554	27.9024	33.7109	uORF
FBtr0072826_180	34.5937	43.4485	25.4567	27.1687	uORF
FBtr0072826_189	27.2907	43.4485	23.011	26.3509	uORF
FBtr0072826_192	27.2907	42.0792	23.011	26.3509	uORF
FBtr0072826_364	33.1331	7.84653	35.2394	12.4488	uORF
FBtr0072826_394	21.4483	5.79257	31.5709	9.99548	uORF
FBtr0072828_36	38.9754	3.73861	73.1473	18.1732	uORF
FBtr0072828_447	74.0297	36.602	45.0221	45.9774	uORF
FBtr0072828_461	177.732	196.126	161.191	147.381	uORF
FBtr0072831_226	114.926	19.4856	93.9355	26.3509	uORF
FBtr0072834_161	100.32	3.05396	90.267	4.27109	uORF
FBtr0072834_81	37.5148	19.4856	23.011	57.4262	uORF
FBtr0072853_110	28.7513	8.53119	35.2394	17.3554	uORF
FBtr0072853_197	139.756	161.894	97.604	126.119	uORF
FBtr0072858_148	41.8966	146.146	25.4567	127.755	uORF
FBtr0072864_65	12.6847	3.73861	12.0055	1	uORF
FBtr0072866_45	6.84237	2.36931	5.89134	5.90663	uORF
FBtr0072901_212	47.739	39.3406	38.9079	58.244	uORF
FBtr0072904_100	44.8178	22.2242	32.7937	18.1732	uORF
FBtr0072904_132	40.436	18.1163	31.5709	16.5377	uORF
FBtr0072904_68	15.6059	6.47723	10.7827	5.90663	uORF
FBtr0072905_116	17.0665	7.16188	2.22284	5.08886	uORF
FBtr0072905_149	12.6847	5.10792	3.44567	3.45331	uORF
FBtr0072905_3	27.2907	11.2698	4.66851	10.8133	uORF
FBtr0072915_21	8.30297	1.68465	2.22284	3.45331	uORF
FBtr0072915_3	8.30297	1.68465	2.22284	3.45331	uORF
FBtr0072921_106	3.92119	8.53119	8.33701	15.7199	uORF
FBtr0072921_211	2.46059	1.68465	5.89134	1.81777	uORF
FBtr0072921_216	2.46059	1	9.55985	1	uORF
FBtr0072930_84	6.84237	1	5.89134	2.63554	uORF
FBtr0072931_4	17.0665	1	14.4512	1.81777	uORF
FBtr0072931_75	21.4483	11.9545	18.1197	6.7244	uORF
FBtr0072938_8	6.84237	1.68465	7.11418	3.45331	uORF
FBtr0072951_176	34.5937	42.7638	26.6795	16.5377	uORF
FBtr0072951_3	22.9089	2.36931	37.6851	9.17771	uORF
FBtr0072955_187	2.46059	2.36931	2.22284	5.90663	uORF
FBtr0072956_101	28.7513	11.9545	30.3481	19.8087	uORF
FBtr0072970_50	8.30297	5.10792	14.4512	17.3554	uORF
FBtr0072970_97	9.76356	13.3238	10.7827	6.7244	uORF
FBtr0072972_268	9.76356	20.1703	8.33701	11.631	uORF
FBtr0072972_78	15.6059	8.53119	3.44567	10.8133	uORF
FBtr0072977_143	6.84237	1	7.11418	1	uORF
FBtr0072980_419	2.46059	4.42327	7.11418	9.99548	uORF
FBtr0072980_453	2.46059	3.05396	3.44567	7.54217	uORF
FBtr0072984_29	5.38178	1.68465	9.55985	1	uORF
FBtr0072984_73	12.6847	3.73861	9.55985	4.27109	uORF
FBtr0072991_211	8.30297	11.9545	16.8969	14.0843	uORF
FBtr0072991_276	11.2242	5.79257	12.0055	3.45331	uORF
FBtr0072991_284	17.0665	2.36931	15.674	4.27109	uORF
FBtr0072991_322	6.84237	1	7.11418	1	uORF
FBtr0073011_349	3.92119	5.79257	2.22284	5.08886	uORF
FBtr0073011_355	2.46059	5.10792	2.22284	5.08886	uORF
FBtr0073023_89	9.76356	10.5851	5.89134	20.6265	uORF
FBtr0073035_204	12.6847	5.10792	5.89134	11.631	uORF
FBtr0073035_211	2.46059	1	5.89134	1	uORF
FBtr0073035_219	11.2242	4.42327	3.44567	10.8133	uORF
FBtr0073043_116	11.2242	14.0084	9.55985	22.2621	uORF
FBtr0073050_317	2.46059	3.05396	2.22284	1.81777	uORF
FBtr0073050_521	3.92119	5.10792	3.44567	2.63554	uORF
FBtr0073050_576	9.76356	4.42327	2.22284	7.54217	uORF
FBtr0073063_164	17.0665	11.2698	36.4622	27.9865	uORF
FBtr0073082_104	44.8178	18.1163	5.89134	14.0843	uORF
FBtr0073082_108	33.1331	1.68465	5.89134	3.45331	uORF
FBtr0073082_122	36.0542	16.747	4.66851	10.8133	uORF
FBtr0073082_126	36.0542	11.9545	8.33701	18.1732	uORF
FBtr0073082_129	31.6725	11.2698	7.11418	17.3554	uORF
FBtr0073086_80	11.2242	2.36931	4.66851	1	uORF
FBtr0073093_113	36.0542	7.84653	41.3536	9.17771	uORF
FBtr0073095_117	18.5271	6.47723	21.7882	6.7244	uORF
FBtr0073105_90	9.76356	1	5.89134	1	uORF
FBtr0073108_66	2.46059	2.36931	2.22284	5.90663	uORF
FBtr0073114_162	6.84237	3.73861	3.44567	2.63554	uORF
FBtr0073118_226	25.8301	4.42327	23.011	3.45331	uORF
FBtr0073118_248	52.1208	13.3238	27.9024	11.631	uORF
FBtr0073118_33	5.38178	3.73861	2.22284	5.08886	uORF
FBtr0073124_109	8.30297	7.16188	10.7827	9.17771	uORF
FBtr0073143_196	9.76356	26.3322	5.89134	33.7109	uORF
FBtr0073143_60	5.38178	8.53119	3.44567	12.4488	uORF
FBtr0073145_104	5.38178	4.42327	10.7827	9.99548	uORF
FBtr0073145_139	3.92119	3.73861	7.11418	5.08886	uORF
FBtr0073145_154	3.92119	2.36931	4.66851	1	uORF
FBtr0073145_545	79.872	29.7554	100.05	25.5331	uORF
FBtr0073157_171	119.308	7.84653	71.9245	14.9021	uORF
FBtr0073163_132	12.6847	4.42327	7.11418	6.7244	uORF
FBtr0073163_431	22.9089	1	14.4512	2.63554	uORF
FBtr0073163_472	44.8178	3.73861	41.3536	9.17771	uORF
FBtr0073165_362	12.6847	1	64.5875	1.81777	uORF
FBtr0073165_412	31.6725	5.10792	71.9245	9.99548	uORF
FBtr0073165_418	34.5937	9.90049	75.593	18.1732	uORF
FBtr0073165_651	75.4903	25.6475	191.762	26.3509	uORF
FBtr0073165_689	56.5026	16.747	107.387	14.0843	uORF
FBtr0073165_752	18.5271	8.53119	62.1418	11.631	uORF
FBtr0073165_842	46.2784	3.73861	117.169	13.2666	uORF
FBtr0073165_962	65.2661	20.8549	71.9245	9.99548	uORF
FBtr0073166_405	43.3572	1.68465	45.0221	1	uORF
FBtr0073166_451	78.4115	18.801	108.61	30.4398	uORF
FBtr0073166_548	53.5814	12.6391	64.5875	50.8841	uORF
FBtr0073166_554	52.1208	6.47723	54.8048	9.99548	uORF
FBtr0073166_664	38.9754	14.6931	40.1307	35.3464	uORF
FBtr0073173_22	3.92119	3.05396	3.44567	2.63554	uORF
FBtr0073173_90	28.7513	8.53119	18.1197	9.99548	uORF
FBtr0073176_112	104.702	27.7015	79.2615	57.4262	uORF
FBtr0073183_66	22.9089	1	3.44567	1	uORF
FBtr0073185_158	5.38178	5.10792	5.89134	1.81777	uORF
FBtr0073185_279	8.30297	3.05396	3.44567	2.63554	uORF
FBtr0073185_399	15.6059	24.9629	4.66851	24.7154	uORF
FBtr0073185_436	9.76356	10.5851	3.44567	10.8133	uORF
FBtr0073187_553	12.6847	7.16188	7.11418	14.0843	uORF
FBtr0073193_37	2.46059	1	2.22284	2.63554	uORF
FBtr0073203_247	6.84237	2.36931	9.55985	10.8133	uORF
FBtr0073209_160	28.7513	5.79257	41.3536	11.631	uORF
FBtr0073211_274	36.0542	1	26.6795	1.81777	uORF
FBtr0073211_417	19.9877	29.0708	31.5709	45.1597	uORF
FBtr0073211_94	19.9877	4.42327	12.0055	14.0843	uORF
FBtr0073215_201	15.6059	4.42327	8.33701	4.27109	uORF
FBtr0073217_151	27.2907	11.9545	29.1252	7.54217	uORF
FBtr0073217_47	24.3695	11.9545	18.1197	19.8087	uORF
FBtr0073217_54	22.9089	11.2698	15.674	18.1732	uORF
FBtr0073217_76	44.8178	16.0624	49.9134	14.0843	uORF
FBtr0073219_183	15.6059	16.747	20.5654	18.991	uORF
FBtr0073219_198	12.6847	6.47723	18.1197	7.54217	uORF
FBtr0073219_211	9.76356	3.05396	13.2284	1	uORF
FBtr0073219_274	17.0665	2.36931	14.4512	1.81777	uORF
FBtr0073219_332	11.2242	1.68465	8.33701	2.63554	uORF
FBtr0073219_443	9.76356	1.68465	3.44567	21.4443	uORF
FBtr0073219_449	8.30297	1.68465	2.22284	1.81777	uORF
FBtr0073219_654	33.1331	3.73861	19.3425	8.35994	uORF
FBtr0073219_759	33.1331	8.53119	23.011	9.99548	uORF
FBtr0073219_822	57.9631	23.5936	53.5819	25.5331	uORF
FBtr0073219_846	44.8178	12.6391	48.6906	14.9021	uORF
FBtr0073219_875	71.1085	8.53119	52.3591	18.1732	uORF
FBtr0073242_6	12.6847	1.68465	8.33701	1.81777	uORF
FBtr0073245_203	5.38178	1	8.33701	6.7244	uORF
FBtr0073271_221	8.30297	3.73861	10.7827	4.27109	uORF
FBtr0073271_443	33.1331	1.68465	20.5654	2.63554	uORF
FBtr0073271_634	25.8301	8.53119	13.2284	9.99548	uORF
FBtr0073271_642	15.6059	4.42327	8.33701	3.45331	uORF
FBtr0073271_675	27.2907	7.16188	18.1197	10.8133	uORF
FBtr0073271_801	21.4483	6.47723	18.1197	11.631	uORF
FBtr0073283_112	17.0665	4.42327	3.44567	3.45331	uORF
FBtr0073291_189	11.2242	4.42327	3.44567	11.631	uORF
FBtr0073298_263	2.46059	1	2.22284	1	uORF
FBtr0073299_206	40.436	9.90049	31.5709	62.3329	uORF
FBtr0073310_147	9.76356	1.68465	16.8969	3.45331	uORF
FBtr0073310_258	18.5271	13.3238	23.011	14.9021	uORF
FBtr0073310_291	8.30297	3.73861	18.1197	2.63554	uORF
FBtr0073310_364	31.6725	20.8549	21.7882	24.7154	uORF
FBtr0073310_415	30.2119	27.0168	31.5709	29.622	uORF
FBtr0073323_28	17.0665	3.05396	3.44567	1.81777	uORF
FBtr0073323_292	6.84237	3.73861	2.22284	5.90663	uORF
FBtr0073323_493	2.46059	1.68465	2.22284	1	uORF
FBtr0073323_505	2.46059	4.42327	3.44567	1.81777	uORF
FBtr0073323_509	9.76356	13.3238	8.33701	8.35994	uORF
FBtr0073323_539	8.30297	8.53119	7.11418	5.90663	uORF
FBtr0073323_544	11.2242	5.79257	14.4512	6.7244	uORF
FBtr0073323_551	8.30297	5.79257	7.11418	5.90663	uORF
FBtr0073323_654	14.1453	6.47723	3.44567	7.54217	uORF
FBtr0073323_733	12.6847	1.68465	4.66851	2.63554	uORF
FBtr0073323_750	31.6725	29.0708	24.2339	7.54217	uORF
FBtr0073323_789	22.9089	22.9089	23.011	6.7244	uORF
FBtr0073337_1203	152.902	29.7554	119.615	41.8886	uORF
FBtr0073337_1216	192.338	104.383	173.42	117.941	uORF
FBtr0073337_603	22.9089	5.10792	20.5654	6.7244	uORF
FBtr0073337_913	79.872	6.47723	78.0386	4.27109	uORF
FBtr0073345_392	8.30297	1.68465	3.44567	3.45331	uORF
FBtr0073345_544	11.2242	5.79257	5.89134	9.17771	uORF
FBtr0073345_56	5.38178	1	13.2284	1.81777	uORF
FBtr0073345_637	9.76356	1	5.89134	3.45331	uORF
FBtr0073345_644	12.6847	1	14.4512	5.90663	uORF
FBtr0073345_800	2.46059	3.05396	4.66851	3.45331	uORF
FBtr0073345_938	2.46059	3.05396	4.66851	3.45331	uORF
FBtr0073345_990	3.92119	5.10792	3.44567	4.27109	uORF
FBtr0073377_27	19.9877	4.42327	8.33701	7.54217	uORF
FBtr0073380_6	8.30297	1.68465	5.89134	5.90663	uORF
FBtr0073380_96	21.4483	7.16188	12.0055	1.81777	uORF
FBtr0073381_160	9.76356	4.42327	12.0055	1.81777	uORF
FBtr0073387_40	154.362	20.1703	63.3646	54.1551	uORF
FBtr0073390_246	2.46059	1.68465	2.22284	1	uORF
FBtr0073393_121	5.38178	3.05396	3.44567	8.35994	uORF
FBtr0073393_134	17.0665	9.21584	2.22284	10.8133	uORF
FBtr0073394_316	9.76356	1	5.89134	1	uORF
FBtr0073394_71	30.2119	21.5396	10.7827	14.9021	uORF
FBtr0073409_82	2.46059	1.68465	2.22284	2.63554	uORF
FBtr0073409_9	2.46059	1.68465	2.22284	2.63554	uORF
FBtr0073410_144	2.46059	1	2.22284	1	uORF
FBtr0073422_155	28.7513	1.68465	13.2284	1	uORF
FBtr0073422_176	17.0665	1	9.55985	1	uORF
FBtr0073429_3	3.92119	1	8.33701	1	uORF
FBtr0073440_31	34.5937	10.5851	2.22284	1	uORF
FBtr0073448_85	27.2907	16.0624	32.7937	14.0843	uORF
FBtr0073451_59	2.46059	3.05396	3.44567	1.81777	uORF
FBtr0073453_224	27.2907	1	31.5709	2.63554	uORF
FBtr0073453_651	5.38178	1.68465	5.89134	5.08886	uORF
FBtr0073454_144	25.8301	5.10792	31.5709	10.8133	uORF
FBtr0073454_83	30.2119	3.73861	20.5654	5.08886	uORF
FBtr0073457_344	24.3695	3.73861	19.3425	6.7244	uORF
FBtr0073457_523	8.30297	1.68465	9.55985	2.63554	uORF
FBtr0073460_45	8.30297	5.10792	8.33701	14.0843	uORF
FBtr0073473_31	2.46059	1.68465	2.22284	1.81777	uORF
FBtr0073475_118	19.9877	6.47723	9.55985	9.17771	uORF
FBtr0073480_53	44.8178	4.42327	14.4512	32.0753	uORF
FBtr0073480_58	57.9631	10.5851	19.3425	40.253	uORF
FBtr0073481_123	9.76356	5.10792	18.1197	2.63554	uORF
FBtr0073481_214	18.5271	3.73861	13.2284	7.54217	uORF
FBtr0073481_224	74.0297	20.1703	85.3757	23.0798	uORF
FBtr0073481_496	22.9089	10.5851	30.3481	8.35994	uORF
FBtr0073481_526	22.9089	7.84653	24.2339	4.27109	uORF
FBtr0073481_814	12.6847	1.68465	19.3425	5.90663	uORF
FBtr0073481_885	5.38178	3.05396	4.66851	5.90663	uORF
FBtr0073482_37	25.8301	10.5851	24.2339	10.8133	uORF
FBtr0073497_151	6.84237	3.05396	3.44567	7.54217	uORF
FBtr0073497_81	2.46059	1	5.89134	3.45331	uORF
FBtr0073499_77	9.76356	3.73861	7.11418	1.81777	uORF
FBtr0073503_335	79.872	29.7554	37.6851	61.5151	uORF
FBtr0073521_370	44.8178	3.05396	20.5654	3.45331	uORF
FBtr0073521_624	19.9877	29.7554	16.8969	5.08886	uORF
FBtr0073540_44	15.6059	8.53119	14.4512	6.7244	uORF
FBtr0073542_111	11.2242	7.16188	20.5654	10.8133	uORF
FBtr0073552_178	12.6847	14.0084	3.44567	1.81777	uORF
FBtr0073552_215	21.4483	9.90049	12.0055	1.81777	uORF
FBtr0073573_122	9.76356	1.68465	4.66851	1.81777	uORF
FBtr0073573_246	5.38178	1.68465	4.66851	1	uORF
FBtr0073573_312	2.46059	1	3.44567	1	uORF
FBtr0073573_80	11.2242	1.68465	4.66851	2.63554	uORF
FBtr0073573_84	8.30297	1	3.44567	1.81777	uORF
FBtr0073573_96	8.30297	1	3.44567	1.81777	uORF
FBtr0073574_230	22.9089	1.68465	5.89134	11.631	uORF
FBtr0073574_247	22.9089	5.10792	9.55985	14.0843	uORF
FBtr0073574_300	5.38178	2.36931	4.66851	1.81777	uORF
FBtr0073579_107	9.76356	1	5.89134	1.81777	uORF
FBtr0073579_46	11.2242	3.73861	9.55985	9.17771	uORF
FBtr0073579_57	6.84237	1.68465	8.33701	6.7244	uORF
FBtr0073579_81	9.76356	2.36931	9.55985	1.81777	uORF
FBtr0073579_92	9.76356	1	8.33701	2.63554	uORF
FBtr0073580_124	6.84237	2.36931	9.55985	5.08886	uORF
FBtr0073580_231	6.84237	1	5.89134	10.8133	uORF
FBtr0073580_249	6.84237	1	4.66851	8.35994	uORF
FBtr0073580_279	3.92119	1	3.44567	2.63554	uORF
FBtr0073580_286	2.46059	1	7.11418	3.45331	uORF
FBtr0073580_292	2.46059	1	5.89134	3.45331	uORF
FBtr0073580_354	2.46059	2.36931	4.66851	3.45331	uORF
FBtr0073580_373	6.84237	5.79257	12.0055	33.7109	uORF
FBtr0073580_395	5.38178	5.10792	8.33701	26.3509	uORF
FBtr0073580_470	11.2242	5.10792	15.674	14.0843	uORF
FBtr0073590_110	25.8301	12.6391	20.5654	9.17771	uORF
FBtr0073590_164	19.9877	6.47723	14.4512	9.17771	uORF
FBtr0073590_83	34.5937	22.9089	24.2339	15.7199	uORF
FBtr0073590_87	76.9509	35.9173	51.1363	27.9865	uORF
FBtr0073600_120	34.5937	5.79257	57.2504	13.2666	uORF
FBtr0073600_38	11.2242	2.36931	9.55985	4.27109	uORF
FBtr0073607_223	68.1873	15.3777	89.0442	35.3464	uORF
FBtr0073615_434	37.5148	3.73861	46.2449	1	uORF
FBtr0073620_281	41.8966	16.0624	30.3481	14.0843	uORF
FBtr0073620_331	34.5937	9.90049	43.7992	21.4443	uORF
FBtr0073641_290	49.1996	9.21584	12.0055	26.3509	uORF
FBtr0073641_84	40.436	16.0624	16.8969	30.4398	uORF
FBtr0073656_270	3.92119	2.36931	3.44567	3.45331	uORF
FBtr0073656_279	3.92119	1.68465	3.44567	2.63554	uORF
FBtr0073658_2	14.1453	4.42327	4.66851	2.63554	uORF
FBtr0073658_27	12.6847	3.05396	2.22284	2.63554	uORF
FBtr0073660_218	12.6847	13.3238	9.55985	23.0798	uORF
FBtr0073660_225	12.6847	11.2698	9.55985	16.5377	uORF
FBtr0073660_72	5.38178	2.36931	3.44567	1.81777	uORF
FBtr0073669_103	11.2242	3.73861	13.2284	17.3554	uORF
FBtr0073669_223	9.76356	14.0084	12.0055	34.5286	uORF
FBtr0073669_244	5.38178	1	7.11418	1	uORF
FBtr0073669_26	8.30297	7.84653	8.33701	12.4488	uORF
FBtr0073678_170	12.6847	5.10792	5.89134	18.1732	uORF
FBtr0073678_244	15.6059	1.68465	14.4512	1.81777	uORF
FBtr0073678_268	14.1453	1	15.674	2.63554	uORF
FBtr0073678_311	3.92119	15.3777	7.11418	32.0753	uORF
FBtr0073678_356	8.30297	1	9.55985	1	uORF
FBtr0073678_397	19.9877	4.42327	25.4567	11.631	uORF
FBtr0073678_828	53.5814	1	58.4733	1	uORF
FBtr0073683_157	22.9089	17.4317	13.2284	29.622	uORF
FBtr0073685_92	12.6847	1	2.22284	1	uORF
FBtr0073692_123	18.5271	1.68465	3.44567	5.08886	uORF
FBtr0073694_172	135.375	2.36931	62.1418	5.90663	uORF
FBtr0073695_139	11.2242	5.10792	4.66851	1.81777	uORF
FBtr0073695_160	9.76356	1	2.22284	1	uORF
FBtr0073695_98	11.2242	1	5.89134	1	uORF
FBtr0073704_241	2.46059	1	3.44567	1	uORF
FBtr0073705_30	176.271	11.9545	58.4733	18.1732	uORF
FBtr0073712_1019	17.0665	3.05396	56.0276	14.0843	uORF
FBtr0073712_1023	12.6847	1	19.3425	4.27109	uORF
FBtr0073712_149	21.4483	5.10792	13.2284	1	uORF
FBtr0073712_657	15.6059	1	14.4512	1	uORF
FBtr0073720_183	6.84237	6.47723	16.8969	12.4488	uORF
FBtr0073724_174	30.2119	19.4856	20.5654	8.35994	uORF
FBtr0073725_29	5.38178	1	3.44567	1	uORF
FBtr0073730_22	63.8055	4.42327	26.6795	16.5377	uORF
FBtr0073747_168	37.5148	3.05396	34.0166	12.4488	uORF
FBtr0073747_258	25.8301	1.68465	14.4512	2.63554	uORF
FBtr0073747_290	15.6059	5.10792	9.55985	2.63554	uORF
FBtr0073747_303	22.9089	4.42327	14.4512	1.81777	uORF
FBtr0073747_414	46.2784	7.84653	36.4622	11.631	uORF
FBtr0073754_73	34.5937	80.4198	35.2394	305.211	uORF
FBtr0073755_248	14.1453	1.68465	9.55985	1	uORF
FBtr0073756_126	5.38178	5.10792	8.33701	5.08886	uORF
FBtr0073756_148	3.92119	1	4.66851	1	uORF
FBtr0073756_172	3.92119	5.10792	8.33701	4.27109	uORF
FBtr0073757_120	6.84237	1.68465	4.66851	3.45331	uORF
FBtr0073767_169	3.92119	3.05396	3.44567	5.08886	uORF
FBtr0073767_203	8.30297	3.73861	4.66851	4.27109	uORF
FBtr0073767_225	8.30297	1	2.22284	1	uORF
FBtr0073767_41	6.84237	9.21584	7.11418	7.54217	uORF
FBtr0073776_273	8.30297	11.2698	12.0055	4.27109	uORF
FBtr0073776_343	19.9877	5.10792	29.1252	6.7244	uORF
FBtr0073779_30	3.92119	2.36931	4.66851	5.08886	uORF
FBtr0073779_81	6.84237	3.73861	5.89134	5.08886	uORF
FBtr0073787_165	14.1453	5.10792	7.11418	9.99548	uORF
FBtr0073787_174	19.9877	9.90049	8.33701	5.08886	uORF
FBtr0073805_202	15.6059	1.68465	8.33701	1	uORF
FBtr0073834_50	8.30297	5.10792	5.89134	6.7244	uORF
FBtr0073834_69	3.92119	5.10792	2.22284	6.7244	uORF
FBtr0073840_216	65.2661	1	41.3536	1	uORF
FBtr0073841_264	6.84237	1.68465	4.66851	1	uORF
FBtr0073841_65	19.9877	5.79257	20.5654	12.4488	uORF
FBtr0073841_85	22.9089	6.47723	14.4512	7.54217	uORF
FBtr0073842_120	33.1331	1	27.9024	1	uORF
FBtr0073843_167	34.5937	24.9629	29.1252	18.991	uORF
FBtr0073843_175	31.6725	22.2242	24.2339	18.991	uORF
FBtr0073843_185	30.2119	20.1703	20.5654	14.9021	uORF
FBtr0073844_288	17.0665	7.84653	4.66851	18.1732	uORF
FBtr0073844_297	15.6059	5.10792	4.66851	13.2666	uORF
FBtr0073846_173	21.4483	7.84653	9.55985	2.63554	uORF
FBtr0073846_184	18.5271	3.05396	8.33701	1.81777	uORF
FBtr0073846_197	18.5271	5.79257	8.33701	2.63554	uORF
FBtr0073846_41	6.84237	3.05396	4.66851	3.45331	uORF
FBtr0073846_56	5.38178	3.05396	2.22284	3.45331	uORF
FBtr0073846_76	27.2907	4.42327	12.0055	5.08886	uORF
FBtr0073846_88	24.3695	4.42327	12.0055	5.08886	uORF
FBtr0073849_12	41.8966	10.5851	41.3536	16.5377	uORF
FBtr0073849_213	53.5814	1	12.0055	1.81777	uORF
FBtr0073849_360	18.5271	9.90049	24.2339	7.54217	uORF
FBtr0073900_29	25.8301	5.79257	15.674	5.08886	uORF
FBtr0073908_138	141.217	106.437	65.8103	388.624	uORF
FBtr0073913_123	28.7513	8.53119	14.4512	5.90663	uORF
FBtr0073913_564	25.8301	3.73861	14.4512	2.63554	uORF
FBtr0073923_482	161.665	43.4485	139.18	30.4398	uORF
FBtr0073939_26	17.0665	2.36931	5.89134	5.08886	uORF
FBtr0073939_294	8.30297	1.68465	4.66851	4.27109	uORF
FBtr0073939_300	15.6059	4.42327	5.89134	13.2666	uORF
FBtr0073940_272	12.6847	3.73861	15.674	8.35994	uORF
FBtr0073946_134	40.436	6.47723	45.0221	11.631	uORF
FBtr0073946_147	91.5568	19.4856	104.941	21.4443	uORF
FBtr0073946_19	33.1331	3.05396	35.2394	4.27109	uORF
FBtr0073946_50	15.6059	1.68465	21.7882	4.27109	uORF
FBtr0073946_9	21.4483	2.36931	15.674	1	uORF
FBtr0073946_94	44.8178	13.3238	52.3591	17.3554	uORF
FBtr0073958_128	8.30297	3.73861	3.44567	9.99548	uORF
FBtr0073958_279	21.4483	9.90049	7.11418	3.45331	uORF
FBtr0073958_349	11.2242	1	8.33701	2.63554	uORF
FBtr0073962_76	8.30297	1	3.44567	1	uORF
FBtr0073962_97	8.30297	1	3.44567	1	uORF
FBtr0073964_28	12.6847	1.68465	4.66851	1	uORF
FBtr0073970_117	3.92119	2.36931	5.89134	1.81777	uORF
FBtr0073970_82	6.84237	35.9173	9.55985	28.8042	uORF
FBtr0073980_198	6.84237	1	2.22284	2.63554	uORF
FBtr0073980_217	5.38178	1	2.22284	1	uORF
FBtr0073983_154	2.46059	1	3.44567	1	uORF
FBtr0073984_49	8.30297	1	5.89134	1	uORF
FBtr0073992_119	59.4237	71.5193	47.4678	90.9548	uORF
FBtr0074012_313	15.6059	1	4.66851	4.27109	uORF
FBtr0074012_428	18.5271	3.73861	9.55985	1.81777	uORF
FBtr0074012_534	11.2242	1	3.44567	1	uORF
FBtr0074053_172	56.5026	11.9545	40.1307	18.991	uORF
FBtr0074053_71	33.1331	7.16188	23.011	18.991	uORF
FBtr0074053_83	31.6725	5.10792	23.011	10.8133	uORF
FBtr0074054_50	22.9089	9.90049	34.0166	5.08886	uORF
FBtr0074054_94	8.30297	1	21.7882	1	uORF
FBtr0074060_123	53.5814	5.79257	31.5709	8.35994	uORF
FBtr0074060_142	38.9754	1	24.2339	1.81777	uORF
FBtr0074063_399	8.30297	7.16188	9.55985	7.54217	uORF
FBtr0074063_502	2.46059	1.68465	10.7827	31.2575	uORF
FBtr0074064_347	18.5271	12.6391	8.33701	7.54217	uORF
FBtr0074064_433	11.2242	21.5396	9.55985	13.2666	uORF
FBtr0074064_439	11.2242	19.4856	8.33701	11.631	uORF
FBtr0074064_476	22.9089	15.3777	7.11418	13.2666	uORF
FBtr0074064_587	12.6847	2.36931	8.33701	1	uORF
FBtr0074064_611	14.1453	1.68465	8.33701	2.63554	uORF
FBtr0074072_166	12.6847	5.10792	3.44567	11.631	uORF
FBtr0074072_315	6.84237	1.68465	8.33701	2.63554	uORF
FBtr0074072_370	3.92119	3.05396	5.89134	2.63554	uORF
FBtr0074072_420	5.38178	2.36931	12.0055	7.54217	uORF
FBtr0074072_461	2.46059	1	5.89134	1	uORF
FBtr0074085_144	135.375	37.2866	111.055	72.9639	uORF
FBtr0074097_53	6.84237	3.05396	2.22284	4.27109	uORF
FBtr0074104_53	8.30297	2.36931	4.66851	11.631	uORF
FBtr0074106_147	78.4115	12.6391	68.256	32.0753	uORF
FBtr0074106_187	149.981	43.4485	114.724	121.212	uORF
FBtr0074106_37	82.7932	17.4317	76.8158	45.1597	uORF
FBtr0074114_152	5.38178	1.68465	10.7827	5.08886	uORF
FBtr0074114_158	8.30297	2.36931	12.0055	1.81777	uORF
FBtr0074114_275	6.84237	5.79257	7.11418	5.90663	uORF
FBtr0074114_34	2.46059	1	2.22284	5.08886	uORF
FBtr0074114_366	28.7513	1	12.0055	2.63554	uORF
FBtr0074114_401	27.2907	14.6931	15.674	20.6265	uORF
FBtr0074114_464	65.2661	26.3322	47.4678	18.991	uORF
FBtr0074114_545	50.6602	14.0084	29.1252	12.4488	uORF
FBtr0074114_74	9.76356	1.68465	2.22284	1.81777	uORF
FBtr0074114_90	19.9877	21.5396	5.89134	21.4443	uORF
FBtr0074117_7	3.92119	1	4.66851	1.81777	uORF
FBtr0074125_199	27.2907	11.9545	21.7882	24.7154	uORF
FBtr0074125_252	22.9089	5.10792	13.2284	8.35994	uORF
FBtr0074125_274	6.84237	1	4.66851	1	uORF
FBtr0074129_160	31.6725	3.05396	16.8969	5.08886	uORF
FBtr0074129_206	52.1208	39.3406	41.3536	31.2575	uORF
FBtr0074129_227	33.1331	17.4317	26.6795	9.17771	uORF
FBtr0074130_218	2.46059	1	2.22284	5.08886	uORF
FBtr0074130_265	9.76356	1.68465	7.11418	4.27109	uORF
FBtr0074130_284	8.30297	1	5.89134	1.81777	uORF
FBtr0074130_314	8.30297	3.05396	3.44567	5.90663	uORF
FBtr0074130_356	5.38178	1.68465	2.22284	2.63554	uORF
FBtr0074130_576	12.6847	5.10792	8.33701	4.27109	uORF
FBtr0074135_107	11.2242	3.73861	13.2284	8.35994	uORF
FBtr0074140_109	2.46059	4.42327	2.22284	18.991	uORF
FBtr0074140_267	22.9089	6.47723	16.8969	5.08886	uORF
FBtr0074140_98	5.38178	5.10792	3.44567	23.8976	uORF
FBtr0074144_15	34.5937	1.68465	20.5654	4.27109	uORF
FBtr0074144_361	224.471	999.224	151.409	846.576	uORF
FBtr0074144_448	167.508	697.292	122.061	580.8	uORF
FBtr0074144_46	37.5148	6.47723	52.3591	45.9774	uORF
FBtr0074144_525	55.042	19.4856	58.4733	50.0663	uORF
FBtr0074144_829	237.616	192.018	140.403	239.789	uORF
FBtr0074153_134	21.4483	5.79257	15.674	6.7244	uORF
FBtr0074153_144	19.9877	3.73861	14.4512	1.81777	uORF
FBtr0074153_176	17.0665	2.36931	5.89134	2.63554	uORF
FBtr0074153_274	21.4483	55.7723	14.4512	66.4217	uORF
FBtr0074153_284	34.5937	133.823	32.7937	114.67	uORF
FBtr0074153_316	19.9877	3.05396	20.5654	14.9021	uORF
FBtr0074159_149	15.6059	7.16188	20.5654	9.99548	uORF
FBtr0074159_73	18.5271	26.3322	10.7827	58.244	uORF
FBtr0074166_126	30.2119	5.10792	16.8969	20.6265	uORF
FBtr0074166_166	91.5568	125.607	51.1363	167.825	uORF
FBtr0074166_206	144.138	14.0084	78.0386	32.8931	uORF
FBtr0074166_9	12.6847	1.68465	7.11418	5.08886	uORF
FBtr0074167_116	37.5148	11.9545	14.4512	13.2666	uORF
FBtr0074167_133	57.9631	10.5851	51.1363	9.99548	uORF
FBtr0074167_185	6.84237	1.68465	7.11418	2.63554	uORF
FBtr0074167_19	3.92119	2.36931	2.22284	1.81777	uORF
FBtr0074167_193	22.9089	8.53119	30.3481	8.35994	uORF
FBtr0074167_273	3.92119	2.36931	9.55985	4.27109	uORF
FBtr0074167_281	12.6847	1.68465	12.0055	1	uORF
FBtr0074167_70	2.46059	1	3.44567	1	uORF
FBtr0074167_95	37.5148	14.0084	16.8969	19.8087	uORF
FBtr0074169_202	224.471	182.433	92.7127	97.497	uORF
FBtr0074169_311	110.545	58.5109	38.9079	41.0708	uORF
FBtr0074169_50	22.9089	21.5396	7.11418	18.991	uORF
FBtr0074169_85	18.5271	1.68465	9.55985	5.90663	uORF
FBtr0074174_104	22.9089	5.79257	32.7937	68.875	uORF
FBtr0074174_123	3.92119	2.36931	3.44567	6.7244	uORF
FBtr0074174_21	33.1331	19.4856	9.55985	35.3464	uORF
FBtr0074174_212	43.3572	37.9713	35.2394	68.0573	uORF
FBtr0074174_314	17.0665	3.05396	15.674	9.99548	uORF
FBtr0074174_332	57.9631	9.21584	25.4567	21.4443	uORF
FBtr0074174_36	31.6725	19.4856	9.55985	35.3464	uORF
FBtr0074174_407	37.5148	24.9629	45.0221	23.0798	uORF
FBtr0074174_414	91.5568	101.644	89.0442	120.395	uORF
FBtr0074174_421	87.175	89.3203	85.3757	113.852	uORF
FBtr0074174_435	78.4115	76.3119	70.7016	101.586	uORF
FBtr0074174_499	21.4483	12.6391	30.3481	22.2621	uORF
FBtr0074178_3	6.84237	1.68465	2.22284	1.81777	uORF
FBtr0074179_179	38.9754	65.3574	16.8969	54.9729	uORF
FBtr0074183_14	5.38178	7.84653	21.7882	7.54217	uORF
FBtr0074183_24	18.5271	14.6931	3.44567	1	uORF
FBtr0074183_54	18.5271	7.84653	13.2284	1.81777	uORF
FBtr0074183_92	27.2907	10.5851	18.1197	9.99548	uORF
FBtr0074184_149	18.5271	1	21.7882	66.4217	uORF
FBtr0074185_184	2.46059	1	2.22284	1	uORF
FBtr0074185_220	3.92119	1	4.66851	1	uORF
FBtr0074185_229	3.92119	1	3.44567	1	uORF
FBtr0074185_235	2.46059	1	3.44567	1	uORF
FBtr0074190_205	18.5271	3.73861	4.66851	1.81777	uORF
FBtr0074190_302	100.32	25.6475	18.1197	10.8133	uORF
FBtr0074190_403	34.5937	11.9545	18.1197	3.45331	uORF
FBtr0074190_420	34.5937	11.2698	15.674	5.90663	uORF
FBtr0074201_11	3.92119	1	4.66851	4.27109	uORF
FBtr0074202_90	3.92119	5.79257	8.33701	5.08886	uORF
FBtr0074203_57	5.38178	2.36931	3.44567	1.81777	uORF
FBtr0074206_188	8.30297	3.73861	13.2284	14.0843	uORF
FBtr0074206_215	3.92119	3.73861	12.0055	9.99548	uORF
FBtr0074206_279	36.0542	29.0708	34.0166	41.8886	uORF
FBtr0074206_308	8.30297	2.36931	5.89134	1	uORF
FBtr0074206_319	11.2242	13.3238	9.55985	16.5377	uORF
FBtr0074206_402	19.9877	9.21584	14.4512	11.631	uORF
FBtr0074206_61	18.5271	1.68465	7.11418	3.45331	uORF
FBtr0074206_81	9.76356	3.73861	5.89134	5.90663	uORF
FBtr0074209_65	68.1873	12.6391	48.6906	45.1597	uORF
FBtr0074226_39	12.6847	5.10792	13.2284	5.08886	uORF
FBtr0074230_163	11.2242	3.73861	2.22284	1	uORF
FBtr0074230_226	3.92119	2.36931	5.89134	1	uORF
FBtr0074237_146	57.9631	41.3945	36.4622	102.404	uORF
FBtr0074240_17	98.8598	3.05396	82.93	4.27109	uORF
FBtr0074250_254	9.76356	3.73861	9.55985	3.45331	uORF
FBtr0074250_269	12.6847	4.42327	12.0055	13.2666	uORF
FBtr0074250_282	12.6847	8.53119	14.4512	19.8087	uORF
FBtr0074251_260	6.84237	6.47723	9.55985	13.2666	uORF
FBtr0074251_429	24.3695	1.68465	16.8969	1.81777	uORF
FBtr0074251_441	17.0665	1.68465	13.2284	1	uORF
FBtr0074251_753	6.84237	1	3.44567	3.45331	uORF
FBtr0074251_770	8.30297	1.68465	4.66851	5.08886	uORF
FBtr0074255_400	5.38178	1.68465	32.7937	3.45331	uORF
FBtr0074255_406	5.38178	1.68465	25.4567	2.63554	uORF
FBtr0074255_459	38.9754	22.2242	57.2504	14.0843	uORF
FBtr0074255_545	12.6847	5.10792	18.1197	10.8133	uORF
FBtr0074255_569	21.4483	23.5936	34.0166	63.9684	uORF
FBtr0074255_807	12.6847	8.53119	9.55985	12.4488	uORF
FBtr0074255_944	17.0665	11.9545	49.9134	26.3509	uORF
FBtr0074255_952	38.9754	3.73861	86.5985	7.54217	uORF
FBtr0074261_100	53.5814	70.15	25.4567	78.6883	uORF
FBtr0074261_142	40.436	63.9881	19.3425	65.6039	uORF
FBtr0074261_92	15.6059	5.10792	9.55985	3.45331	uORF
FBtr0074268_146	2.46059	1	2.22284	1.81777	uORF
FBtr0074268_235	2.46059	1	2.22284	1	uORF
FBtr0074268_243	3.92119	1.68465	3.44567	1	uORF
FBtr0074268_60	2.46059	1	2.22284	1.81777	uORF
FBtr0074272_104	2.46059	1	2.22284	1.81777	uORF
FBtr0074272_92	2.46059	1	2.22284	1	uORF
FBtr0074285_114	40.436	3.73861	32.7937	8.35994	uORF
FBtr0074285_123	37.5148	1.68465	30.3481	7.54217	uORF
FBtr0074285_231	81.3326	3.73861	37.6851	4.27109	uORF
FBtr0074285_267	50.6602	3.05396	23.011	4.27109	uORF
FBtr0074286_533	30.2119	5.79257	29.1252	21.4443	uORF
FBtr0074286_736	30.2119	11.9545	15.674	5.90663	uORF
FBtr0074294_116	24.3695	20.1703	31.5709	22.2621	uORF
FBtr0074307_202	5.38178	3.05396	5.89134	5.90663	uORF
FBtr0074307_71	3.92119	1.68465	4.66851	1.81777	uORF
FBtr0074314_149	12.6847	3.05396	4.66851	11.631	uORF
FBtr0074314_222	5.38178	2.36931	9.55985	2.63554	uORF
FBtr0074314_35	14.1453	1	10.7827	1.81777	uORF
FBtr0074314_420	8.30297	3.05396	9.55985	5.90663	uORF
FBtr0074315_81	2.46059	1	2.22284	1	uORF
FBtr0074335_110	2.46059	1	2.22284	1	uORF
FBtr0074335_139	3.92119	1	4.66851	1	uORF
FBtr0074335_15	2.46059	1	2.22284	1	uORF
FBtr0074335_152	2.46059	1	3.44567	1	uORF
FBtr0074335_161	2.46059	1	3.44567	1	uORF
FBtr0074335_65	2.46059	1	5.89134	1	uORF
FBtr0074344_571	24.3695	3.73861	15.674	8.35994	uORF
FBtr0074344_644	18.5271	144.777	9.55985	50.8841	uORF
FBtr0074348_90	14.1453	3.05396	16.8969	5.08886	uORF
FBtr0074348_96	11.2242	2.36931	15.674	1.81777	uORF
FBtr0074350_348	8.30297	66.7267	19.3425	166.19	uORF
FBtr0074350_368	6.84237	9.21584	13.2284	63.1506	uORF
FBtr0074355_25	2.46059	1.68465	4.66851	1	uORF
FBtr0074357_100	11.2242	1	15.674	4.27109	uORF
FBtr0074357_106	11.2242	1	15.674	4.27109	uORF
FBtr0074357_115	11.2242	1	13.2284	1.81777	uORF
FBtr0074357_126	18.5271	4.42327	18.1197	5.08886	uORF
FBtr0074357_154	24.3695	6.47723	21.7882	9.17771	uORF
FBtr0074359_379	12.6847	11.2698	2.22284	1	uORF
FBtr0074359_385	11.2242	9.90049	13.2284	11.631	uORF
FBtr0074359_427	28.7513	2.36931	37.6851	7.54217	uORF
FBtr0074359_61	12.6847	1.68465	4.66851	1	uORF
FBtr0074365_206	22.9089	4.42327	16.8969	10.8133	uORF
FBtr0074365_67	17.0665	5.79257	12.0055	5.08886	uORF
FBtr0074372_122	11.2242	3.73861	13.2284	1.81777	uORF
FBtr0074372_131	11.2242	3.73861	13.2284	1.81777	uORF
FBtr0074372_322	6.84237	1	5.89134	2.63554	uORF
FBtr0074372_391	3.92119	1	2.22284	1.81777	uORF
FBtr0074372_397	3.92119	1	2.22284	1.81777	uORF
FBtr0074372_62	11.2242	3.73861	14.4512	1.81777	uORF
FBtr0074383_113	14.1453	10.5851	5.89134	14.0843	uORF
FBtr0074386_188	9.76356	5.79257	18.1197	3.45331	uORF
FBtr0074386_391	3.92119	3.73861	5.89134	1.81777	uORF
FBtr0074386_45	5.38178	2.36931	3.44567	1	uORF
FBtr0074417_133	12.6847	1	12.0055	5.90663	uORF
FBtr0074417_27	3.92119	1.68465	2.22284	3.45331	uORF
FBtr0074464_133	34.5937	20.8549	34.0166	20.6265	uORF
FBtr0074464_316	52.1208	8.53119	15.674	18.1732	uORF
FBtr0074464_322	142.678	9.90049	68.256	18.991	uORF
FBtr0074465_50	2.46059	1	2.22284	5.08886	uORF
FBtr0074476_264	11.2242	2.36931	3.44567	1.81777	uORF
FBtr0074476_330	30.2119	3.73861	14.4512	17.3554	uORF
FBtr0074480_24	38.9754	8.53119	14.4512	4.27109	uORF
FBtr0074486_15	2.46059	2.36931	2.22284	12.4488	uORF
FBtr0074487_355	12.6847	13.3238	12.0055	16.5377	uORF
FBtr0074492_23	5.38178	1.68465	3.44567	1	uORF
FBtr0074492_29	5.38178	1.68465	3.44567	1	uORF
FBtr0074492_92	6.84237	13.3238	7.11418	22.2621	uORF
FBtr0074505_132	33.1331	9.90049	8.33701	7.54217	uORF
FBtr0074505_284	12.6847	5.79257	3.44567	1	uORF
FBtr0074505_619	3.92119	3.05396	2.22284	1.81777	uORF
FBtr0074527_103	18.5271	5.10792	15.674	17.3554	uORF
FBtr0074530_93	3.92119	1	2.22284	1	uORF
FBtr0074540_52	9.76356	9.90049	8.33701	7.54217	uORF
FBtr0074546_242	3.92119	3.05396	4.66851	3.45331	uORF
FBtr0074555_104	21.4483	12.6391	14.4512	13.2666	uORF
FBtr0074555_334	36.0542	20.8549	34.0166	18.1732	uORF
FBtr0074609_146	2.46059	1.68465	3.44567	1	uORF
FBtr0074609_332	27.2907	7.16188	8.33701	29.622	uORF
FBtr0074612_87	22.9089	14.0084	9.55985	4.27109	uORF
FBtr0074617_143	43.3572	6.47723	52.3591	25.5331	uORF
FBtr0074617_159	49.1996	10.5851	31.5709	18.1732	uORF
FBtr0074617_355	27.2907	1	18.1197	2.63554	uORF
FBtr0074617_363	33.1331	4.42327	25.4567	3.45331	uORF
FBtr0074622_160	68.1873	8.53119	24.2339	3.45331	uORF
FBtr0074623_147	5.38178	9.21584	5.89134	10.8133	uORF
FBtr0074623_308	9.76356	7.16188	13.2284	12.4488	uORF
FBtr0074623_425	6.84237	2.36931	9.55985	5.90663	uORF
FBtr0074623_60	12.6847	27.0168	8.33701	37.7997	uORF
FBtr0074623_63	12.6847	27.0168	8.33701	37.7997	uORF
FBtr0074623_96	8.30297	20.8549	5.89134	32.8931	uORF
FBtr0074635_11	14.1453	19.4856	5.89134	7.54217	uORF
FBtr0074635_22	27.2907	15.3777	7.11418	22.2621	uORF
FBtr0074647_140	43.3572	14.0084	13.2284	8.35994	uORF
FBtr0074655_113	15.6059	4.42327	8.33701	3.45331	uORF
FBtr0074666_52	17.0665	11.2698	5.89134	20.6265	uORF
FBtr0074671_261	9.76356	1	9.55985	1	uORF
FBtr0074676_113	3.92119	1	4.66851	1.81777	uORF
FBtr0074676_77	3.92119	1	7.11418	1	uORF
FBtr0074683_345	8.30297	4.42327	2.22284	3.45331	uORF
FBtr0074684_456	15.6059	3.73861	13.2284	5.08886	uORF
FBtr0074684_600	19.9877	18.1163	7.11418	22.2621	uORF
FBtr0074684_623	12.6847	3.05396	4.66851	11.631	uORF
FBtr0074684_728	9.76356	8.53119	8.33701	9.99548	uORF
FBtr0074684_844	3.92119	3.05396	5.89134	13.2666	uORF
FBtr0074687_180	2.46059	1	2.22284	1	uORF
FBtr0074687_193	2.46059	1	2.22284	1	uORF
FBtr0074687_826	24.3695	1	32.7937	1.81777	uORF
FBtr0074687_83	9.76356	3.05396	2.22284	1	uORF
FBtr0074687_958	5.38178	1	4.66851	1	uORF
FBtr0074691_20	12.6847	5.10792	15.674	8.35994	uORF
FBtr0074691_220	8.30297	2.36931	18.1197	5.08886	uORF
FBtr0074691_271	24.3695	1.68465	32.7937	9.17771	uORF
FBtr0074691_55	6.84237	1	14.4512	4.27109	uORF
FBtr0074695_59	133.914	34.548	157.523	62.3329	uORF
FBtr0074695_68	129.532	34.548	150.186	58.244	uORF
FBtr0074707_132	24.3695	4.42327	16.8969	9.99548	uORF
FBtr0074707_503	9.76356	4.42327	4.66851	8.35994	uORF
FBtr0074707_555	18.5271	27.7015	9.55985	12.4488	uORF
FBtr0074707_677	11.2242	4.42327	8.33701	7.54217	uORF
FBtr0074707_84	33.1331	9.90049	21.7882	30.4398	uORF
FBtr0074711_28	5.38178	1	2.22284	1.81777	uORF
FBtr0074721_272	33.1331	3.73861	16.8969	5.08886	uORF
FBtr0074721_320	17.0665	2.36931	13.2284	2.63554	uORF
FBtr0074721_361	12.6847	1.68465	8.33701	1.81777	uORF
FBtr0074721_414	18.5271	3.73861	2.22284	9.17771	uORF
FBtr0074721_650	11.2242	20.8549	20.5654	22.2621	uORF
FBtr0074750_59	15.6059	18.801	21.7882	23.8976	uORF
FBtr0074753_23	9.76356	1	3.44567	1.81777	uORF
FBtr0074754_119	30.2119	16.747	35.2394	6.7244	uORF
FBtr0074754_9	27.2907	2.36931	2.22284	1	uORF
FBtr0074758_220	11.2242	1.68465	5.89134	1	uORF
FBtr0074758_407	15.6059	1	5.89134	1	uORF
FBtr0074759_101	3.92119	3.05396	13.2284	5.90663	uORF
FBtr0074760_43	27.2907	18.1163	21.7882	12.4488	uORF
FBtr0074768_41	12.6847	1.68465	5.89134	10.8133	uORF
FBtr0074771_104	40.436	52.349	35.2394	61.5151	uORF
FBtr0074771_157	171.889	50.295	124.506	61.5151	uORF
FBtr0074771_321	152.902	23.5936	128.175	23.8976	uORF
FBtr0074771_334	41.8966	14.0084	34.0166	12.4488	uORF
FBtr0074771_344	40.436	14.6931	26.6795	3.45331	uORF
FBtr0074771_491	31.6725	1	25.4567	1	uORF
FBtr0074771_95	22.9089	7.84653	27.9024	14.0843	uORF
FBtr0074775_149	8.30297	7.84653	10.7827	5.08886	uORF
FBtr0074775_4	3.92119	1	2.22284	1	uORF
FBtr0074788_474	31.6725	31.1247	59.6961	32.8931	uORF
FBtr0074788_496	12.6847	12.6391	27.9024	7.54217	uORF
FBtr0074790_216	22.9089	3.73861	29.1252	8.35994	uORF
FBtr0074790_239	43.3572	7.16188	46.2449	13.2666	uORF
FBtr0074790_66	15.6059	3.05396	25.4567	6.7244	uORF
FBtr0074790_84	8.30297	2.36931	15.674	5.08886	uORF
FBtr0074795_141	27.2907	13.3238	10.7827	33.7109	uORF
FBtr0074800_103	5.38178	6.47723	4.66851	4.27109	uORF
FBtr0074800_114	3.92119	1	3.44567	1	uORF
FBtr0074800_296	34.5937	38.6559	24.2339	18.991	uORF
FBtr0074800_43	8.30297	8.53119	5.89134	5.90663	uORF
FBtr0074804_223	21.4483	5.79257	23.011	7.54217	uORF
FBtr0074804_258	25.8301	4.42327	18.1197	6.7244	uORF
FBtr0074804_277	12.6847	3.05396	14.4512	6.7244	uORF
FBtr0074804_287	9.76356	3.05396	5.89134	2.63554	uORF
FBtr0074804_299	6.84237	1	5.89134	2.63554	uORF
FBtr0074804_313	17.0665	2.36931	10.7827	5.08886	uORF
FBtr0074804_319	15.6059	2.36931	10.7827	5.08886	uORF
FBtr0074804_348	65.2661	7.84653	23.011	7.54217	uORF
FBtr0074804_725	17.0665	3.73861	2.22284	5.08886	uORF
FBtr0074804_877	6.84237	3.05396	3.44567	1	uORF
FBtr0074807_223	2.46059	1	7.11418	1.81777	uORF
FBtr0074807_836	9.76356	1.68465	10.7827	2.63554	uORF
FBtr0074807_866	15.6059	1	7.11418	1	uORF
FBtr0074807_906	6.84237	1	3.44567	1	uORF
FBtr0074810_258	122.229	45.5025	56.0276	94.2259	uORF
FBtr0074812_165	15.6059	1.68465	20.5654	4.27109	uORF
FBtr0074825_110	5.38178	9.90049	3.44567	5.08886	uORF
FBtr0074825_124	11.2242	15.3777	3.44567	4.27109	uORF
FBtr0074825_353	2.46059	2.36931	2.22284	1	uORF
FBtr0074825_77	5.38178	11.9545	4.66851	5.08886	uORF
FBtr0074837_70	15.6059	7.16188	4.66851	24.7154	uORF
FBtr0074839_470	2.46059	1	4.66851	1	uORF
FBtr0074840_126	161.665	85.897	98.8269	142.474	uORF
FBtr0074841_21	49.1996	8.53119	20.5654	36.9819	uORF
FBtr0074841_344	47.739	22.9089	31.5709	93.4082	uORF
FBtr0074841_418	57.9631	22.9089	27.9024	20.6265	uORF
FBtr0074841_430	53.5814	16.0624	26.6795	17.3554	uORF
FBtr0074841_57	44.8178	7.16188	15.674	35.3464	uORF
FBtr0074846_74	11.2242	10.5851	10.7827	13.2666	uORF
FBtr0074848_206	3.92119	4.42327	4.66851	5.90663	uORF
FBtr0074848_451	8.30297	3.73861	5.89134	5.08886	uORF
FBtr0074848_466	8.30297	2.36931	4.66851	4.27109	uORF
FBtr0074848_480	15.6059	1.68465	7.11418	1	uORF
FBtr0074848_558	5.38178	1	2.22284	1	uORF
FBtr0074848_87	3.92119	1	2.22284	1	uORF
FBtr0074850_142	18.5271	1	20.5654	1.81777	uORF
FBtr0074850_153	18.5271	9.90049	20.5654	8.35994	uORF
FBtr0074850_229	6.84237	3.05396	7.11418	5.08886	uORF
FBtr0074850_51	5.38178	3.05396	5.89134	9.99548	uORF
FBtr0074869_25	2.46059	1	2.22284	1.81777	uORF
FBtr0074870_182	88.6356	26.3322	68.256	36.9819	uORF
FBtr0074870_193	72.5691	11.2698	51.1363	20.6265	uORF
FBtr0074870_228	60.8843	9.90049	69.4788	14.0843	uORF
FBtr0074870_408	59.4237	10.5851	54.8048	20.6265	uORF
FBtr0074870_87	38.9754	57.1416	32.7937	78.6883	uORF
FBtr0074871_536	9.76356	7.16188	5.89134	8.35994	uORF
FBtr0074871_631	19.9877	1.68465	3.44567	2.63554	uORF
FBtr0074873_100	57.9631	168.055	23.011	256.145	uORF
FBtr0074873_173	55.042	90.6896	27.9024	63.9684	uORF
FBtr0074881_55	40.436	19.4856	3.44567	6.7244	uORF
FBtr0074882_119	50.6602	3.73861	34.0166	20.6265	uORF
FBtr0074882_292	30.2119	8.53119	25.4567	27.9865	uORF
FBtr0074882_81	5.38178	5.79257	8.33701	2.63554	uORF
FBtr0074882_93	25.8301	5.10792	45.0221	24.7154	uORF
FBtr0074891_115	15.6059	10.5851	7.11418	38.6175	uORF
FBtr0074891_6	3.92119	1	4.66851	1	uORF
FBtr0074894_51	15.6059	1.68465	19.3425	5.08886	uORF
FBtr0074900_153	30.2119	42.7638	37.6851	162.101	uORF
FBtr0074900_216	30.2119	55.7723	24.2339	160.465	uORF
FBtr0074900_87	47.739	140.669	54.8048	338.74	uORF
FBtr0074902_123	120.769	309.779	65.8103	336.286	uORF
FBtr0074902_138	104.702	277.6	47.4678	317.478	uORF
FBtr0074902_181	72.5691	29.0708	36.4622	66.4217	uORF
FBtr0074902_226	33.1331	11.2698	23.011	22.2621	uORF
FBtr0074903_22	53.5814	107.121	14.4512	189.087	uORF
FBtr0074903_29	43.3572	83.843	12.0055	115.488	uORF
FBtr0074903_36	38.9754	24.9629	9.55985	44.3419	uORF
FBtr0074908_77	6.84237	1	3.44567	1	uORF
FBtr0074911_61	8.30297	2.36931	12.0055	5.90663	uORF
FBtr0074917_144	2.46059	1	5.89134	3.45331	uORF
FBtr0074917_202	6.84237	3.05396	2.22284	1.81777	uORF
FBtr0074917_339	12.6847	5.10792	5.89134	9.17771	uORF
FBtr0074917_71	3.92119	1	2.22284	2.63554	uORF
FBtr0074917_86	2.46059	1	2.22284	2.63554	uORF
FBtr0074920_164	19.9877	4.42327	15.674	10.8133	uORF
FBtr0074920_185	19.9877	1.68465	15.674	6.7244	uORF
FBtr0074921_373	82.7932	24.9629	34.0166	45.9774	uORF
FBtr0074921_401	60.8843	22.2242	24.2339	29.622	uORF
FBtr0074924_58	11.2242	3.73861	9.55985	16.5377	uORF
FBtr0074924_78	19.9877	13.3238	14.4512	18.1732	uORF
FBtr0074936_72	2.46059	1	2.22284	1	uORF
FBtr0074938_12	2.46059	1	2.22284	2.63554	uORF
FBtr0074947_102	14.1453	7.84653	5.89134	9.17771	uORF
FBtr0074949_82	71.1085	1	69.4788	1	uORF
FBtr0074953_380	30.2119	4.42327	16.8969	9.17771	uORF
FBtr0074963_154	8.30297	28.3861	5.89134	27.1687	uORF
FBtr0074963_177	28.7513	14.6931	12.0055	5.08886	uORF
FBtr0074963_246	15.6059	5.79257	10.7827	15.7199	uORF
FBtr0074976_1121	8.30297	1	4.66851	5.08886	uORF
FBtr0074976_1166	8.30297	1	4.66851	5.08886	uORF
FBtr0074976_1169	8.30297	1	4.66851	5.08886	uORF
FBtr0074976_1275	3.92119	3.73861	3.44567	14.9021	uORF
FBtr0074989_151	63.8055	29.0708	63.3646	30.4398	uORF
FBtr0074989_223	30.2119	14.0084	34.0166	15.7199	uORF
FBtr0074989_69	18.5271	4.42327	7.11418	5.90663	uORF
FBtr0074991_19	5.38178	2.36931	4.66851	3.45331	uORF
FBtr0075018_50	27.2907	11.9545	8.33701	18.991	uORF
FBtr0075019_57	8.30297	23.5936	8.33701	27.1687	uORF
FBtr0075022_51	6.84237	1.68465	5.89134	7.54217	uORF
FBtr0075023_105	3.92119	1.68465	2.22284	1.81777	uORF
FBtr0075023_143	9.76356	6.47723	3.44567	1.81777	uORF
FBtr0075023_152	8.30297	2.36931	3.44567	1	uORF
FBtr0075023_91	8.30297	2.36931	2.22284	1	uORF
FBtr0075023_95	9.76356	3.05396	3.44567	2.63554	uORF
FBtr0075025_169	57.9631	5.79257	27.9024	35.3464	uORF
FBtr0075033_5	12.6847	1	2.22284	1	uORF
FBtr0075037_1	25.8301	6.47723	16.8969	3.45331	uORF
FBtr0075037_147	9.76356	6.47723	10.7827	14.9021	uORF
FBtr0075037_150	9.76356	5.79257	10.7827	12.4488	uORF
FBtr0075037_232	17.0665	1.68465	9.55985	1	uORF
FBtr0075037_307	17.0665	1	9.55985	1	uORF
FBtr0075037_313	17.0665	1	9.55985	1	uORF
FBtr0075037_319	17.0665	1	9.55985	1	uORF
FBtr0075037_331	17.0665	1	9.55985	1	uORF
FBtr0075039_168	11.2242	1	9.55985	3.45331	uORF
FBtr0075039_176	14.1453	1	9.55985	1.81777	uORF
FBtr0075039_611	6.84237	5.79257	3.44567	5.90663	uORF
FBtr0075039_630	15.6059	12.6391	19.3425	23.0798	uORF
FBtr0075046_135	2.46059	1	2.22284	1	uORF
FBtr0075046_141	2.46059	1	2.22284	1	uORF
FBtr0075046_156	2.46059	1	2.22284	1	uORF
FBtr0075049_248	22.9089	7.84653	31.5709	15.7199	uORF
FBtr0075049_32	21.4483	3.05396	16.8969	1.81777	uORF
FBtr0075049_417	33.1331	1	31.5709	4.27109	uORF
FBtr0075049_638	37.5148	23.5936	27.9024	39.4353	uORF
FBtr0075049_662	33.1331	18.1163	26.6795	36.9819	uORF
FBtr0075049_666	43.3572	20.8549	43.7992	36.1642	uORF
FBtr0075049_737	9.76356	3.05396	7.11418	14.0843	uORF
FBtr0075056_39	3.92119	1	2.22284	4.27109	uORF
FBtr0075056_70	3.92119	1	2.22284	1	uORF
FBtr0075056_8	3.92119	1	2.22284	4.27109	uORF
FBtr0075064_165	11.2242	12.6391	10.7827	5.90663	uORF
FBtr0075077_261	40.436	14.0084	46.2449	14.9021	uORF
FBtr0075077_67	41.8966	10.5851	81.7072	23.0798	uORF
FBtr0075081_115	5.38178	2.36931	3.44567	1.81777	uORF
FBtr0075084_429	33.1331	9.90049	2.22284	2.63554	uORF
FBtr0075084_707	11.2242	1	3.44567	1	uORF
FBtr0075086_1134	36.0542	15.3777	2.22284	1	uORF
FBtr0075086_1148	36.0542	14.0084	2.22284	1	uORF
FBtr0075086_1196	15.6059	7.84653	2.22284	1	uORF
FBtr0075086_695	38.9754	7.84653	2.22284	1	uORF
FBtr0075086_733	68.1873	15.3777	2.22284	1	uORF
FBtr0075086_786	60.8843	23.5936	2.22284	1	uORF
FBtr0075086_904	46.2784	5.79257	3.44567	1	uORF
FBtr0075122_60	2.46059	1.68465	2.22284	1.81777	uORF
FBtr0075123_152	2.46059	1	2.22284	2.63554	uORF
FBtr0075125_152	2.46059	1	2.22284	2.63554	uORF
FBtr0075126_127	5.38178	1	2.22284	2.63554	uORF
FBtr0075126_139	9.76356	4.42327	8.33701	4.27109	uORF
FBtr0075126_166	8.30297	1.68465	7.11418	2.63554	uORF
FBtr0075133_199	14.1453	2.36931	13.2284	1.81777	uORF
FBtr0075133_315	3.92119	1.68465	4.66851	2.63554	uORF
FBtr0075136_28	8.30297	8.53119	9.55985	9.17771	uORF
FBtr0075139_318	2.46059	1	3.44567	2.63554	uORF
FBtr0075139_327	2.46059	1	3.44567	2.63554	uORF
FBtr0075139_407	2.46059	1.68465	2.22284	1	uORF
FBtr0075139_534	2.46059	1.68465	2.22284	1	uORF
FBtr0075139_579	2.46059	1.68465	2.22284	1	uORF
FBtr0075139_620	19.9877	5.10792	9.55985	4.27109	uORF
FBtr0075139_702	9.76356	4.42327	7.11418	2.63554	uORF
FBtr0075139_714	9.76356	4.42327	7.11418	2.63554	uORF
FBtr0075139_720	9.76356	4.42327	7.11418	2.63554	uORF
FBtr0075139_732	9.76356	4.42327	5.89134	2.63554	uORF
FBtr0075139_738	9.76356	4.42327	5.89134	2.63554	uORF
FBtr0075139_744	9.76356	3.73861	5.89134	2.63554	uORF
FBtr0075139_756	5.38178	3.73861	5.89134	2.63554	uORF
FBtr0075139_762	5.38178	3.73861	5.89134	2.63554	uORF
FBtr0075139_774	5.38178	3.73861	5.89134	2.63554	uORF
FBtr0075139_780	5.38178	3.73861	4.66851	2.63554	uORF
FBtr0075139_831	11.2242	1	4.66851	2.63554	uORF
FBtr0075140_139	147.059	4.42327	103.718	7.54217	uORF
FBtr0075140_153	182.114	7.16188	136.735	21.4443	uORF
FBtr0075142_97	11.2242	1.68465	5.89134	5.90663	uORF
FBtr0075144_13	6.84237	7.84653	2.22284	9.99548	uORF
FBtr0075152_72	2.46059	2.36931	2.22284	5.90663	uORF
FBtr0075153_383	11.2242	2.36931	3.44567	10.8133	uORF
FBtr0075153_387	14.1453	3.05396	3.44567	5.08886	uORF
FBtr0075153_889	15.6059	17.4317	9.55985	15.7199	uORF
FBtr0075160_37	14.1453	14.0084	10.7827	11.631	uORF
FBtr0075161_94	22.9089	38.6559	7.11418	27.9865	uORF
FBtr0075173_295	11.2242	3.73861	8.33701	2.63554	uORF
FBtr0075173_481	14.1453	18.1163	13.2284	22.2621	uORF
FBtr0075173_510	12.6847	20.1703	9.55985	16.5377	uORF
FBtr0075186_12	33.1331	1	35.2394	2.63554	uORF
FBtr0075186_244	14.1453	1.68465	18.1197	3.45331	uORF
FBtr0075186_504	15.6059	3.73861	24.2339	16.5377	uORF
FBtr0075197_368	17.0665	1	12.0055	2.63554	uORF
FBtr0075204_333	19.9877	1	10.7827	6.7244	uORF
FBtr0075204_474	6.84237	1	2.22284	1	uORF
FBtr0075204_484	8.30297	1.68465	3.44567	1	uORF
FBtr0075204_712	8.30297	2.36931	3.44567	4.27109	uORF
FBtr0075208_44	8.30297	1.68465	3.44567	2.63554	uORF
FBtr0075219_421	2.46059	2.36931	2.22284	3.45331	uORF
FBtr0075219_448	2.46059	2.36931	2.22284	3.45331	uORF
FBtr0075220_56	31.6725	22.9089	9.55985	50.8841	uORF
FBtr0075221_101	8.30297	1	8.33701	1	uORF
FBtr0075221_114	2.46059	1	4.66851	1	uORF
FBtr0075221_138	3.92119	1	4.66851	1	uORF
FBtr0075222_238	164.586	2.36931	118.392	1.81777	uORF
FBtr0075223_96	2.46059	1	2.22284	1	uORF
FBtr0075228_130	25.8301	7.84653	38.9079	14.9021	uORF
FBtr0075228_15	40.436	6.47723	48.6906	26.3509	uORF
FBtr0075228_29	15.6059	5.79257	23.011	18.1732	uORF
FBtr0075228_72	36.0542	1.68465	32.7937	6.7244	uORF
FBtr0075229_29	5.38178	1	4.66851	5.90663	uORF
FBtr0075232_127	11.2242	1.68465	3.44567	2.63554	uORF
FBtr0075241_161	11.2242	4.42327	8.33701	42.7063	uORF
FBtr0075275_107	8.30297	5.79257	7.11418	5.90663	uORF
FBtr0075275_196	9.76356	2.36931	4.66851	2.63554	uORF
FBtr0075275_57	2.46059	1	5.89134	1.81777	uORF
FBtr0075279_145	25.8301	18.1163	15.674	13.2666	uORF
FBtr0075279_164	27.2907	33.1787	15.674	23.8976	uORF
FBtr0075293_95	34.5937	20.8549	21.7882	22.2621	uORF
FBtr0075311_193	25.8301	9.90049	34.0166	32.8931	uORF
FBtr0075326_45	2.46059	5.79257	3.44567	2.63554	uORF
FBtr0075332_109	43.3572	16.747	26.6795	12.4488	uORF
FBtr0075332_116	44.8178	23.5936	38.9079	10.8133	uORF
FBtr0075332_245	28.7513	3.73861	31.5709	6.7244	uORF
FBtr0075332_251	27.2907	3.73861	26.6795	6.7244	uORF
FBtr0075332_346	9.76356	2.36931	5.89134	11.631	uORF
FBtr0075332_354	9.76356	2.36931	5.89134	8.35994	uORF
FBtr0075332_360	9.76356	1.68465	4.66851	5.08886	uORF
FBtr0075332_402	18.5271	6.47723	18.1197	19.8087	uORF
FBtr0075332_543	8.30297	3.05396	9.55985	15.7199	uORF
FBtr0075332_611	44.8178	3.73861	36.4622	2.63554	uORF
FBtr0075332_622	47.739	3.05396	34.0166	1.81777	uORF
FBtr0075332_640	41.8966	3.05396	24.2339	1.81777	uORF
FBtr0075369_1	243.459	13.3238	117.169	66.4217	uORF
FBtr0075408_233	8.30297	1.68465	12.0055	3.45331	uORF
FBtr0075408_334	14.1453	1	8.33701	1	uORF
FBtr0075408_343	19.9877	18.801	10.7827	13.2666	uORF
FBtr0075412_255	183.574	9.21584	126.952	32.0753	uORF
FBtr0075435_236	3.92119	1	3.44567	1	uORF
FBtr0075437_16	18.5271	2.36931	9.55985	5.08886	uORF
FBtr0075457_138	14.1453	41.3945	7.11418	184.999	uORF
FBtr0075459_260	6.84237	1.68465	5.89134	4.27109	uORF
FBtr0075459_97	3.92119	5.79257	5.89134	12.4488	uORF
FBtr0075485_162	2.46059	1	2.22284	1	uORF
FBtr0075497_28	2.46059	2.36931	2.22284	3.45331	uORF
FBtr0075497_37	2.46059	2.36931	2.22284	3.45331	uORF
FBtr0075499_175	18.5271	48.2411	45.0221	67.2395	uORF
FBtr0075499_206	88.6356	70.8346	90.267	99.9503	uORF
FBtr0075505_111	6.84237	14.6931	8.33701	18.1732	uORF
FBtr0075510_170	6.84237	9.90049	2.22284	12.4488	uORF
FBtr0075510_176	6.84237	9.21584	2.22284	9.17771	uORF
FBtr0075512_27	6.84237	4.42327	5.89134	5.08886	uORF
FBtr0075512_39	5.38178	3.73861	5.89134	4.27109	uORF
FBtr0075522_61	3.92119	1	3.44567	1	uORF
FBtr0075536_14	6.84237	1	4.66851	7.54217	uORF
FBtr0075547_91	2.46059	1	3.44567	1	uORF
FBtr0075562_135	49.1996	63.9881	16.8969	2.63554	uORF
FBtr0075562_153	36.0542	55.0876	16.8969	2.63554	uORF
FBtr0075562_198	27.2907	27.0168	10.7827	1	uORF
FBtr0075579_98	19.9877	12.6391	7.11418	27.1687	uORF
FBtr0075604_12	8.30297	5.10792	10.7827	14.9021	uORF
FBtr0075604_211	21.4483	7.84653	18.1197	24.7154	uORF
FBtr0075604_23	37.5148	5.10792	24.2339	18.991	uORF
FBtr0075604_258	9.76356	1	13.2284	1	uORF
FBtr0075604_266	6.84237	1.68465	12.0055	1.81777	uORF
FBtr0075607_398	3.92119	1.68465	3.44567	1.81777	uORF
FBtr0075614_109	2.46059	1	2.22284	1.81777	uORF
FBtr0075614_392	2.46059	4.42327	4.66851	2.63554	uORF
FBtr0075626_159	25.8301	23.5936	7.11418	21.4443	uORF
FBtr0075626_171	21.4483	20.8549	7.11418	17.3554	uORF
FBtr0075626_219	19.9877	1	5.89134	1	uORF
FBtr0075626_291	28.7513	7.84653	15.674	8.35994	uORF
FBtr0075626_30	22.9089	3.73861	5.89134	3.45331	uORF
FBtr0075626_72	17.0665	5.79257	3.44567	9.17771	uORF
FBtr0075637_79	3.92119	3.05396	2.22284	1	uORF
FBtr0075641_110	2.46059	3.73861	4.66851	4.27109	uORF
FBtr0075641_168	8.30297	7.84653	8.33701	6.7244	uORF
FBtr0075641_271	6.84237	6.47723	9.55985	5.90663	uORF
FBtr0075645_74	6.84237	1	2.22284	1	uORF
FBtr0075651_212	21.4483	14.0084	8.33701	17.3554	uORF
FBtr0075651_232	3.92119	1	2.22284	1.81777	uORF
FBtr0075651_261	5.38178	2.36931	2.22284	1	uORF
FBtr0075651_359	12.6847	7.84653	7.11418	10.8133	uORF
FBtr0075657_17	2.46059	1.68465	2.22284	3.45331	uORF
FBtr0075657_219	2.46059	4.42327	12.0055	11.631	uORF
FBtr0075657_274	19.9877	4.42327	12.0055	3.45331	uORF
FBtr0075671_282	6.84237	3.05396	3.44567	4.27109	uORF
FBtr0075671_295	3.92119	1.68465	2.22284	1	uORF
FBtr0075671_303	6.84237	3.05396	3.44567	3.45331	uORF
FBtr0075671_309	6.84237	2.36931	3.44567	3.45331	uORF
FBtr0075671_383	2.46059	2.36931	2.22284	3.45331	uORF
FBtr0075679_125	19.9877	1	12.0055	2.63554	uORF
FBtr0075679_191	12.6847	5.79257	12.0055	5.08886	uORF
FBtr0075679_222	8.30297	8.53119	10.7827	3.45331	uORF
FBtr0075693_147	8.30297	5.79257	3.44567	1	uORF
FBtr0075693_53	12.6847	5.10792	16.8969	7.54217	uORF
FBtr0075693_87	8.30297	1	10.7827	5.08886	uORF
FBtr0075695_443	88.6356	113.283	16.8969	56.6085	uORF
FBtr0075695_452	82.7932	88.6356	16.8969	56.6085	uORF
FBtr0075724_281	44.8178	12.6391	47.4678	39.4353	uORF
FBtr0075724_289	25.8301	1.68465	25.4567	5.90663	uORF
FBtr0075756_99	49.1996	22.2242	32.7937	39.4353	uORF
FBtr0075758_459	14.1453	5.10792	4.66851	1.81777	uORF
FBtr0075759_83	9.76356	3.05396	4.66851	1.81777	uORF
FBtr0075768_129	8.30297	3.73861	5.89134	6.7244	uORF
FBtr0075768_154	9.76356	20.1703	2.22284	3.45331	uORF
FBtr0075768_418	11.2242	11.9545	2.22284	10.8133	uORF
FBtr0075775_121	129.532	19.4856	84.1528	26.3509	uORF
FBtr0075775_670	47.739	9.90049	35.2394	18.1732	uORF
FBtr0075777_25	3.92119	1.68465	2.22284	1.81777	uORF
FBtr0075778_251	6.84237	8.53119	4.66851	8.35994	uORF
FBtr0075778_302	6.84237	2.36931	4.66851	5.90663	uORF
FBtr0075781_118	27.2907	3.05396	21.7882	4.27109	uORF
FBtr0075781_26	14.1453	22.9089	20.5654	19.8087	uORF
FBtr0075784_177	2.46059	1.68465	3.44567	1	uORF
FBtr0075784_183	5.38178	1	7.11418	1	uORF
FBtr0075784_55	3.92119	5.10792	2.22284	14.0843	uORF
FBtr0075784_87	5.38178	29.7554	3.44567	32.8931	uORF
FBtr0075812_366	21.4483	6.47723	23.011	13.2666	uORF
FBtr0075812_406	9.76356	2.36931	15.674	1.81777	uORF
FBtr0075812_528	22.9089	8.53119	21.7882	8.35994	uORF
FBtr0075812_534	22.9089	7.16188	20.5654	7.54217	uORF
FBtr0075812_578	17.0665	1	7.11418	2.63554	uORF
FBtr0075813_151	9.76356	11.2698	13.2284	17.3554	uORF
FBtr0075813_184	15.6059	7.16188	24.2339	4.27109	uORF
FBtr0075817_18	5.38178	2.36931	4.66851	1	uORF
FBtr0075817_29	2.46059	1	4.66851	1	uORF
FBtr0075820_195	18.5271	9.90049	23.011	9.17771	uORF
FBtr0075820_250	11.2242	2.36931	8.33701	4.27109	uORF
FBtr0075855_199	21.4483	5.10792	18.1197	4.27109	uORF
FBtr0075855_373	12.6847	7.84653	13.2284	12.4488	uORF
FBtr0075855_386	12.6847	3.05396	10.7827	6.7244	uORF
FBtr0075898_105	19.9877	20.1703	10.7827	12.4488	uORF
FBtr0075908_225	8.30297	2.36931	5.89134	3.45331	uORF
FBtr0075908_233	8.30297	3.05396	5.89134	4.27109	uORF
FBtr0075909_241	2.46059	1	2.22284	1	uORF
FBtr0075909_259	2.46059	1	2.22284	1	uORF
FBtr0075909_675	8.30297	2.36931	3.44567	4.27109	uORF
FBtr0075929_127	12.6847	3.05396	3.44567	2.63554	uORF
FBtr0075935_133	11.2242	7.16188	10.7827	12.4488	uORF
FBtr0075935_154	8.30297	2.36931	7.11418	6.7244	uORF
FBtr0075935_242	17.0665	9.90049	36.4622	27.9865	uORF
FBtr0075935_322	14.1453	12.6391	14.4512	13.2666	uORF
FBtr0075935_42	12.6847	3.05396	5.89134	2.63554	uORF
FBtr0075935_85	8.30297	3.05396	8.33701	9.17771	uORF
FBtr0075942_227	24.3695	18.1163	8.33701	12.4488	uORF
FBtr0075942_241	101.781	24.9629	49.9134	25.5331	uORF
FBtr0075942_247	101.781	23.5936	49.9134	24.7154	uORF
FBtr0075942_266	38.9754	3.05396	21.7882	1.81777	uORF
FBtr0075942_99	34.5937	8.53119	30.3481	53.3374	uORF
FBtr0075948_100	17.0665	44.1332	3.44567	28.8042	uORF
FBtr0075948_130	9.76356	22.9089	3.44567	16.5377	uORF
FBtr0075948_172	5.38178	2.36931	2.22284	2.63554	uORF
FBtr0075948_195	9.76356	2.36931	5.89134	4.27109	uORF
FBtr0075948_217	9.76356	1	5.89134	3.45331	uORF
FBtr0075948_44	11.2242	17.4317	7.11418	12.4488	uORF
FBtr0075953_173	2.46059	1	3.44567	1	uORF
FBtr0075957_98	3.92119	3.73861	2.22284	30.4398	uORF
FBtr0075968_57	40.436	3.05396	25.4567	4.27109	uORF
FBtr0075976_36	22.9089	3.73861	5.89134	7.54217	uORF
FBtr0075979_188	5.38178	1	5.89134	1.81777	uORF
FBtr0075979_216	11.2242	5.79257	18.1197	3.45331	uORF
FBtr0075979_292	5.38178	1.68465	10.7827	1	uORF
FBtr0075980_270	3.92119	4.42327	3.44567	2.63554	uORF
FBtr0075981_139	78.4115	9.21584	19.3425	3.45331	uORF
FBtr0075982_176	11.2242	8.53119	13.2284	2.63554	uORF
FBtr0075997_100	84.2538	35.2327	63.3646	77.8705	uORF
FBtr0075998_287	3.92119	9.21584	2.22284	27.1687	uORF
FBtr0076000_54	2.46059	3.73861	3.44567	9.17771	uORF
FBtr0076006_47	5.38178	3.73861	2.22284	2.63554	uORF
FBtr0076020_263	3.92119	1	3.44567	2.63554	uORF
FBtr0076020_397	3.92119	3.05396	2.22284	5.90663	uORF
FBtr0076020_522	31.6725	35.9173	45.0221	41.0708	uORF
FBtr0076020_673	19.9877	10.5851	18.1197	16.5377	uORF
FBtr0076020_683	2.46059	7.16188	3.44567	9.17771	uORF
FBtr0076028_112	2.46059	2.36931	2.22284	1	uORF
FBtr0076049_93	2.46059	1	2.22284	1.81777	uORF
FBtr0076075_207	22.9089	1.68465	13.2284	1	uORF
FBtr0076075_261	9.76356	1.68465	5.89134	1	uORF
FBtr0076075_284	19.9877	1.68465	8.33701	1.81777	uORF
FBtr0076075_292	24.3695	1.68465	10.7827	1.81777	uORF
FBtr0076075_315	22.9089	1	10.7827	1	uORF
FBtr0076077_48	2.46059	20.8549	7.11418	33.7109	uORF
FBtr0076077_9	2.46059	22.2242	7.11418	34.5286	uORF
FBtr0076080_123	62.3449	9.90049	2.22284	3.45331	uORF
FBtr0076080_37	3.92119	2.36931	2.22284	5.08886	uORF
FBtr0076093_396	38.9754	5.79257	40.1307	9.99548	uORF
FBtr0076093_478	27.2907	11.2698	21.7882	66.4217	uORF
FBtr0076093_604	14.1453	3.73861	12.0055	1	uORF
FBtr0076093_619	11.2242	3.73861	12.0055	22.2621	uORF
FBtr0076106_259	22.9089	10.5851	3.44567	36.1642	uORF
FBtr0076106_488	50.6602	5.10792	21.7882	2.63554	uORF
FBtr0076106_521	44.8178	7.16188	19.3425	5.90663	uORF
FBtr0076106_632	3.92119	3.05396	4.66851	1.81777	uORF
FBtr0076107_39	3.92119	15.3777	2.22284	29.622	uORF
FBtr0076108_107	44.8178	19.4856	13.2284	9.99548	uORF
FBtr0076108_89	53.5814	29.0708	13.2284	20.6265	uORF
FBtr0076114_66	3.92119	4.42327	13.2284	7.54217	uORF
FBtr0076133_346	21.4483	7.16188	48.6906	24.7154	uORF
FBtr0076133_450	14.1453	1.68465	24.2339	2.63554	uORF
FBtr0076146_152	2.46059	1	7.11418	3.45331	uORF
FBtr0076146_158	3.92119	2.36931	5.89134	3.45331	uORF
FBtr0076146_315	2.46059	2.36931	3.44567	1.81777	uORF
FBtr0076161_180	3.92119	1	2.22284	1	uORF
FBtr0076161_186	3.92119	1	2.22284	1	uORF
FBtr0076165_103	28.7513	22.9089	26.6795	7.54217	uORF
FBtr0076165_108	27.2907	26.3322	24.2339	9.17771	uORF
FBtr0076168_177	46.2784	10.5851	57.2504	54.1551	uORF
[truncated: 19,572 more rows]

## Sheet: figS18B
# Only expressed genes
id	mel_mrna_cnt	mel_rpf_cnt	sim_mrna_cnt	sim_rpf_cnt	feature
FBtr0070026_78	8.30297	6.47723	9.55985	6.7244	uORF
FBtr0070028_236	106.163	9.90049	80.4843	14.0843	uORF
FBtr0070028_388	44.8178	13.3238	35.2394	11.631	uORF
FBtr0070028_394	44.8178	12.6391	31.5709	6.7244	uORF
FBtr0070028_60	8.30297	2.36931	9.55985	8.35994	uORF
FBtr0070091_146	28.7513	15.3777	26.6795	38.6175	uORF
FBtr0070123_106	11.2242	3.05396	3.44567	2.63554	uORF
FBtr0070140_116	100.32	12.6391	24.2339	11.631	uORF
FBtr0070146_208	11.2242	3.73861	5.89134	7.54217	uORF
FBtr0070146_242	22.9089	3.73861	9.55985	5.08886	uORF
FBtr0070146_36	5.38178	2.36931	4.66851	1	uORF
FBtr0070146_470	24.3695	9.90049	26.6795	9.17771	uORF
FBtr0070151_241	31.6725	7.84653	26.6795	4.27109	uORF
FBtr0070151_247	31.6725	5.79257	26.6795	4.27109	uORF
FBtr0070151_380	33.1331	19.4856	20.5654	11.631	uORF
FBtr0070151_429	113.466	29.0708	71.9245	48.4307	uORF
FBtr0070167_168	6.84237	1.68465	9.55985	1.81777	uORF
FBtr0070167_489	8.30297	3.05396	3.44567	1	uORF
FBtr0070235_141	17.0665	5.10792	13.2284	1	uORF
FBtr0070235_248	55.042	6.47723	34.0166	4.27109	uORF
FBtr0070235_272	52.1208	5.10792	25.4567	4.27109	uORF
FBtr0070259_271	63.8055	7.84653	47.4678	12.4488	uORF
FBtr0070260_18	11.2242	7.84653	2.22284	18.1732	uORF
FBtr0070260_242	28.7513	18.801	38.9079	15.7199	uORF
FBtr0070260_46	5.38178	4.42327	2.22284	13.2666	uORF
FBtr0070270_124	36.0542	21.5396	18.1197	17.3554	uORF
FBtr0070270_210	43.3572	9.21584	35.2394	36.9819	uORF
FBtr0070270_246	33.1331	3.73861	29.1252	18.1732	uORF
FBtr0070270_264	33.1331	1.68465	27.9024	14.0843	uORF
FBtr0070270_270	31.6725	1.68465	24.2339	10.8133	uORF
FBtr0070289_74	56.5026	3.05396	57.2504	4.27109	uORF
FBtr0070289_81	50.6602	2.36931	58.4733	4.27109	uORF
FBtr0070313_203	5.38178	3.05396	2.22284	4.27109	uORF
FBtr0070313_88	6.84237	6.47723	3.44567	5.08886	uORF
FBtr0070316_127	28.7513	34.548	21.7882	40.253	uORF
FBtr0070316_337	46.2784	20.8549	30.3481	40.253	uORF
FBtr0070316_97	40.436	39.3406	26.6795	68.875	uORF
FBtr0070317_223	46.2784	21.5396	53.5819	30.4398	uORF
FBtr0070317_286	27.2907	14.6931	42.5764	21.4443	uORF
FBtr0070317_84	18.5271	20.1703	20.5654	23.0798	uORF
FBtr0070345_75	24.3695	8.53119	9.55985	9.17771	uORF
FBtr0070345_78	24.3695	7.84653	9.55985	8.35994	uORF
FBtr0070345_83	33.1331	7.16188	15.674	7.54217	uORF
FBtr0070346_158	30.2119	1	21.7882	4.27109	uORF
FBtr0070346_164	119.308	22.2242	126.952	70.5106	uORF
FBtr0070346_34	12.6847	7.16188	7.11418	18.991	uORF
FBtr0070363_49	9.76356	3.73861	4.66851	16.5377	uORF
FBtr0070379_348	38.9754	13.3238	21.7882	31.2575	uORF
FBtr0070379_381	37.5148	11.2698	21.7882	23.0798	uORF
FBtr0070379_547	6.84237	1	7.11418	2.63554	uORF
FBtr0070381_60	145.599	16.0624	68.256	20.6265	uORF
FBtr0070381_64	157.284	21.5396	76.8158	18.991	uORF
FBtr0070389_37	9.76356	5.79257	4.66851	7.54217	uORF
FBtr0070393_470	14.1453	8.53119	8.33701	9.99548	uORF
FBtr0070408_167	5.38178	1	7.11418	1.81777	uORF
FBtr0070412_190	84.2538	13.3238	68.256	14.9021	uORF
FBtr0070412_385	24.3695	7.84653	9.55985	32.8931	uORF
FBtr0070412_69	28.7513	7.84653	12.0055	32.0753	uORF
FBtr0070414_242	11.2242	1	9.55985	7.54217	uORF
FBtr0070414_350	24.3695	11.2698	23.011	12.4488	uORF
FBtr0070414_376	57.9631	7.16188	40.1307	7.54217	uORF
FBtr0070414_44	24.3695	15.3777	25.4567	27.9865	uORF
FBtr0070414_62	22.9089	8.53119	25.4567	20.6265	uORF
FBtr0070422_10	230.313	12.6391	254.127	30.4398	uORF
FBtr0070422_49	223.01	12.6391	254.127	29.622	uORF
FBtr0070429_305	8.30297	1.68465	5.89134	2.63554	uORF
FBtr0070429_308	3.92119	1	5.89134	2.63554	uORF
FBtr0070429_393	8.30297	5.10792	8.33701	4.27109	uORF
FBtr0070429_405	8.30297	3.73861	5.89134	4.27109	uORF
FBtr0070429_540	31.6725	38.6559	41.3536	81.1416	uORF
FBtr0070429_566	8.30297	3.05396	13.2284	2.63554	uORF
FBtr0070429_628	18.5271	25.6475	26.6795	49.2485	uORF
FBtr0070429_678	15.6059	7.16188	18.1197	5.08886	uORF
FBtr0070439_1002	69.6479	19.4856	41.3536	15.7199	uORF
FBtr0070439_1007	177.732	32.494	114.724	22.2621	uORF
FBtr0070439_1041	202.562	17.4317	139.18	11.631	uORF
FBtr0070439_124	71.1085	4.42327	118.392	45.9774	uORF
FBtr0070439_135	57.9631	4.42327	48.6906	16.5377	uORF
FBtr0070439_607	71.1085	12.6391	40.1307	3.45331	uORF
FBtr0070439_993	74.0297	24.2782	43.7992	22.2621	uORF
FBtr0070479_83	21.4483	23.5936	8.33701	22.2621	uORF
FBtr0070507_184	5.38178	3.05396	4.66851	1.81777	uORF
FBtr0070507_189	5.38178	1	7.11418	1	uORF
FBtr0070507_194	9.76356	10.5851	8.33701	12.4488	uORF
FBtr0070507_203	9.76356	10.5851	8.33701	12.4488	uORF
FBtr0070507_510	2.46059	9.90049	7.11418	14.9021	uORF
FBtr0070525_554	8.30297	31.8094	25.4567	109.764	uORF
FBtr0070559_1651	6.84237	4.42327	7.11418	2.63554	uORF
FBtr0070559_2169	8.30297	6.47723	4.66851	8.35994	uORF
FBtr0070568_35	9.76356	1.68465	12.0055	5.08886	uORF
FBtr0070611_44	74.0297	32.494	80.4843	63.1506	uORF
FBtr0070616_241	44.8178	6.47723	57.2504	111.399	uORF
FBtr0070626_335	18.5271	36.602	8.33701	31.2575	uORF
FBtr0070626_353	17.0665	34.548	8.33701	31.2575	uORF
FBtr0070626_380	17.0665	33.8634	8.33701	30.4398	uORF
FBtr0070650_568	52.1208	61.9341	41.3536	42.7063	uORF
FBtr0070650_679	163.126	46.8718	85.3757	38.6175	uORF
FBtr0070650_695	237.616	108.491	95.1583	197.265	uORF
FBtr0070650_763	76.9509	87.2663	46.2449	118.759	uORF
FBtr0070650_876	1178.24	393.991	448.558	382.081	uORF
FBtr0070652_125	11.2242	5.79257	8.33701	14.0843	uORF
FBtr0070671_129	18.5271	4.42327	15.674	6.7244	uORF
FBtr0070671_68	17.0665	14.6931	16.8969	27.9865	uORF
FBtr0070680_452	9.76356	3.05396	13.2284	3.45331	uORF
FBtr0070685_109	14.1453	3.05396	8.33701	5.90663	uORF
FBtr0070685_195	9.76356	3.73861	9.55985	5.90663	uORF
FBtr0070685_272	14.1453	9.21584	5.89134	10.8133	uORF
FBtr0070685_407	22.9089	15.3777	5.89134	26.3509	uORF
FBtr0070685_619	19.9877	7.16188	14.4512	5.90663	uORF
FBtr0070686_17	50.6602	11.2698	24.2339	19.8087	uORF
FBtr0070688_31	60.8843	12.6391	79.2615	17.3554	uORF
FBtr0070724_123	21.4483	21.5396	10.7827	36.1642	uORF
FBtr0070724_144	12.6847	16.0624	7.11418	23.8976	uORF
FBtr0070724_150	11.2242	5.79257	7.11418	15.7199	uORF
FBtr0070724_168	14.1453	3.05396	21.7882	14.0843	uORF
FBtr0070724_174	14.1453	3.05396	20.5654	14.0843	uORF
FBtr0070724_195	11.2242	2.36931	18.1197	10.8133	uORF
FBtr0070724_41	6.84237	7.84653	5.89134	9.99548	uORF
FBtr0070724_57	14.1453	5.10792	8.33701	6.7244	uORF
FBtr0070764_84	53.5814	33.8634	37.6851	82.7771	uORF
FBtr0070772_89	5.38178	2.36931	25.4567	28.8042	uORF
FBtr0070778_303	2.46059	1	9.55985	2.63554	uORF
FBtr0070778_375	8.30297	5.79257	14.4512	8.35994	uORF
FBtr0070778_431	18.5271	9.90049	18.1197	8.35994	uORF
FBtr0070797_160	17.0665	2.36931	15.674	1	uORF
FBtr0070797_165	14.1453	1	15.674	1	uORF
FBtr0070804_460	41.8966	14.6931	26.6795	36.1642	uORF
FBtr0070827_15	11.2242	18.801	8.33701	9.17771	uORF
FBtr0070827_78	5.38178	14.0084	7.11418	5.08886	uORF
FBtr0070841_119	17.0665	4.42327	8.33701	3.45331	uORF
FBtr0070841_156	22.9089	1.68465	3.44567	1	uORF
FBtr0070841_284	12.6847	2.36931	3.44567	2.63554	uORF
FBtr0070843_127	17.0665	20.8549	14.4512	65.6039	uORF
FBtr0070874_120	33.1331	33.1787	15.674	14.0843	uORF
FBtr0070874_251	19.9877	1	13.2284	2.63554	uORF
FBtr0070874_268	24.3695	12.6391	24.2339	12.4488	uORF
FBtr0070877_18	43.3572	2.36931	8.33701	1.81777	uORF
FBtr0070921_24	8.30297	2.36931	2.22284	7.54217	uORF
FBtr0070924_54	30.2119	5.10792	35.2394	13.2666	uORF
FBtr0070930_113	43.3572	1.68465	32.7937	2.63554	uORF
FBtr0070930_169	18.5271	2.36931	30.3481	3.45331	uORF
FBtr0070937_246	15.6059	6.47723	8.33701	1.81777	uORF
FBtr0070948_119	9.76356	17.4317	9.55985	14.0843	uORF
FBtr0070948_157	15.6059	38.6559	10.7827	39.4353	uORF
FBtr0070948_222	6.84237	2.36931	4.66851	2.63554	uORF
FBtr0070948_32	31.6725	84.5277	16.8969	14.0843	uORF
FBtr0070948_321	5.38178	7.16188	4.66851	9.99548	uORF
FBtr0070948_329	8.30297	11.9545	5.89134	13.2666	uORF
FBtr0070948_594	60.8843	59.8802	60.9189	45.1597	uORF
FBtr0070948_84	21.4483	60.5648	7.11418	7.54217	uORF
FBtr0070956_490	164.586	50.295	98.8269	94.2259	uORF
FBtr0070959_1093	19.9877	7.84653	18.1197	15.7199	uORF
FBtr0070959_1102	17.0665	5.79257	18.1197	14.0843	uORF
FBtr0070959_396	9.76356	1.68465	7.11418	1.81777	uORF
FBtr0070959_417	9.76356	1.68465	7.11418	1.81777	uORF
FBtr0070959_47	15.6059	3.05396	13.2284	1	uORF
FBtr0070972_113	6.84237	3.05396	4.66851	1.81777	uORF
FBtr0070972_90	12.6847	6.47723	5.89134	10.8133	uORF
FBtr0070984_103	5.38178	3.73861	4.66851	18.1732	uORF
FBtr0070984_221	15.6059	9.90049	13.2284	18.1732	uORF
FBtr0070984_286	9.76356	3.73861	14.4512	26.3509	uORF
FBtr0070988_110	62.3449	12.6391	49.9134	54.9729	uORF
FBtr0070988_159	27.2907	4.42327	15.674	41.0708	uORF
FBtr0070988_241	28.7513	11.2698	27.9024	24.7154	uORF
FBtr0070988_25	8.30297	5.79257	2.22284	12.4488	uORF
FBtr0070988_264	31.6725	10.5851	18.1197	9.99548	uORF
FBtr0070988_416	22.9089	1	15.674	1	uORF
FBtr0070988_436	5.38178	1.68465	14.4512	1.81777	uORF
FBtr0070988_45	9.76356	3.73861	2.22284	5.90663	uORF
FBtr0070988_518	21.4483	3.73861	14.4512	12.4488	uORF
FBtr0070988_541	19.9877	7.16188	9.55985	11.631	uORF
FBtr0070988_582	37.5148	27.0168	21.7882	33.7109	uORF
FBtr0070988_628	44.8178	16.0624	35.2394	24.7154	uORF
FBtr0070988_854	27.2907	1.68465	25.4567	3.45331	uORF
FBtr0070990_179	3.92119	1	3.44567	1	uORF
FBtr0070990_306	3.92119	1	3.44567	1	uORF
FBtr0070992_52	14.1453	1.68465	7.11418	9.17771	uORF
FBtr0070994_109	50.6602	11.9545	26.6795	9.99548	uORF
FBtr0071005_300	116.387	46.1871	53.5819	45.1597	uORF
FBtr0071013_103	36.0542	23.5936	37.6851	40.253	uORF
FBtr0071013_223	82.7932	97.5361	81.7072	78.6883	uORF
FBtr0071036_313	47.739	16.0624	38.9079	27.9865	uORF
FBtr0071036_410	37.5148	79.0505	49.9134	535.005	uORF
FBtr0071036_501	215.707	94.1128	183.203	158.012	uORF
FBtr0071057_13	24.3695	2.36931	4.66851	3.45331	uORF
FBtr0071079_223	6.84237	1	8.33701	1	uORF
FBtr0071089_57	15.6059	1.68465	4.66851	1	uORF
FBtr0071092_100	22.9089	6.47723	12.0055	11.631	uORF
FBtr0071092_113	6.84237	1.68465	4.66851	1	uORF
FBtr0071092_300	12.6847	3.73861	7.11418	4.27109	uORF
FBtr0071092_668	17.0665	16.747	14.4512	28.8042	uORF
FBtr0071092_686	14.1453	14.0084	13.2284	23.8976	uORF
FBtr0071092_95	8.30297	1.68465	3.44567	1.81777	uORF
FBtr0071093_109	36.0542	7.16188	30.3481	12.4488	uORF
FBtr0071109_1024	36.0542	10.5851	21.7882	8.35994	uORF
FBtr0071109_106	2.46059	6.47723	2.22284	2.63554	uORF
FBtr0071109_135	2.46059	1	2.22284	7.54217	uORF
FBtr0071109_725	12.6847	5.79257	9.55985	6.7244	uORF
FBtr0071109_852	30.2119	7.84653	14.4512	10.8133	uORF
FBtr0071109_888	27.2907	5.10792	14.4512	4.27109	uORF
FBtr0071112_117	46.2784	31.1247	37.6851	32.8931	uORF
FBtr0071112_148	100.32	20.1703	93.9355	13.2666	uORF
FBtr0071112_335	199.641	24.2782	206.436	26.3509	uORF
FBtr0071112_393	56.5026	8.53119	58.4733	7.54217	uORF
FBtr0071112_8	9.76356	5.10792	9.55985	5.90663	uORF
FBtr0071117_165	3.92119	17.4317	4.66851	15.7199	uORF
FBtr0071125_20	27.2907	9.21584	14.4512	18.991	uORF
FBtr0071125_365	41.8966	1	37.6851	1.81777	uORF
FBtr0071125_395	31.6725	1	21.7882	2.63554	uORF
FBtr0071132_33	5.38178	1	9.55985	27.1687	uORF
FBtr0071132_409	8.30297	1	5.89134	5.90663	uORF
FBtr0071140_41	173.35	5.79257	89.0442	3.45331	uORF
FBtr0071170_151	9.76356	2.36931	8.33701	5.90663	uORF
FBtr0071170_159	9.76356	3.73861	14.4512	9.17771	uORF
FBtr0071170_595	22.9089	4.42327	24.2339	12.4488	uORF
FBtr0071174_328	2.46059	1.68465	5.89134	1	uORF
FBtr0071174_49	31.6725	8.53119	23.011	16.5377	uORF
FBtr0071174_80	15.6059	5.79257	18.1197	12.4488	uORF
FBtr0071174_89	14.1453	5.10792	18.1197	8.35994	uORF
FBtr0071175_155	14.1453	22.9089	16.8969	7.54217	uORF
FBtr0071175_285	22.9089	1	5.89134	1	uORF
FBtr0071183_31	24.3695	3.73861	12.0055	5.08886	uORF
FBtr0071183_4	24.3695	3.73861	12.0055	5.08886	uORF
FBtr0071192_481	128.072	30.4401	80.4843	23.8976	uORF
FBtr0071219_345	6.84237	12.6391	7.11418	26.3509	uORF
FBtr0071219_348	6.84237	1	7.11418	8.35994	uORF
FBtr0071235_34	87.175	374.136	161.191	150.652	uORF
FBtr0071253_160	11.2242	10.5851	23.011	34.5286	uORF
FBtr0071299_199	8.30297	7.84653	23.011	8.35994	uORF
FBtr0071300_44	6.84237	3.73861	12.0055	1.81777	uORF
FBtr0071361_136	160.205	16.747	148.963	24.7154	uORF
FBtr0071363_45	12.6847	9.21584	10.7827	29.622	uORF
FBtr0071363_52	11.2242	6.47723	9.55985	20.6265	uORF
FBtr0071367_240	2.46059	1.68465	2.22284	5.08886	uORF
FBtr0071367_247	2.46059	1	2.22284	4.27109	uORF
FBtr0071367_265	2.46059	1	2.22284	2.63554	uORF
FBtr0071393_27	74.0297	1	16.8969	19.8087	uORF
FBtr0071424_3	5773.27	35.9173	2619.09	60.6973	uORF
FBtr0071430_74	2.46059	1.68465	5.89134	8.35994	uORF
FBtr0071444_117	320.87	85.897	268.801	108.946	uORF
FBtr0071444_57	528.274	98.2208	459.563	144.11	uORF
FBtr0071460_312	2.46059	3.05396	8.33701	16.5377	uORF
FBtr0071460_52	9.76356	1.68465	41.3536	14.9021	uORF
FBtr0071460_575	18.5271	17.4317	20.5654	39.4353	uORF
FBtr0071493_116	9.76356	3.05396	18.1197	6.7244	uORF
FBtr0071493_502	17.0665	5.79257	25.4567	20.6265	uORF
FBtr0071493_51	11.2242	1.68465	26.6795	7.54217	uORF
FBtr0071493_544	9.76356	3.05396	15.674	7.54217	uORF
FBtr0071503_16	18.5271	1	19.3425	1.81777	uORF
FBtr0071522_31	25.8301	5.10792	23.011	20.6265	uORF
FBtr0071526_55	2.46059	2.36931	2.22284	1.81777	uORF
FBtr0071546_266	24.3695	9.90049	25.4567	14.0843	uORF
FBtr0071546_504	15.6059	16.747	20.5654	16.5377	uORF
FBtr0071546_510	15.6059	14.6931	20.5654	16.5377	uORF
FBtr0071546_702	3.92119	3.05396	12.0055	1.81777	uORF
FBtr0071563_183	17.0665	3.73861	20.5654	1	uORF
FBtr0071563_190	28.7513	30.4401	32.7937	32.0753	uORF
FBtr0071563_203	27.2907	29.7554	32.7937	32.8931	uORF
FBtr0071563_329	49.1996	13.3238	42.5764	10.8133	uORF
FBtr0071567_95	122.229	208.45	98.8269	342.828	uORF
FBtr0071590_125	3.92119	3.73861	2.22284	2.63554	uORF
FBtr0071590_61	3.92119	14.0084	4.66851	6.7244	uORF
FBtr0071606_165	6.84237	1.68465	2.22284	3.45331	uORF
FBtr0071641_141	11.2242	26.3322	4.66851	49.2485	uORF
FBtr0071654_284	3.92119	3.05396	8.33701	3.45331	uORF
FBtr0071654_287	3.92119	3.05396	8.33701	2.63554	uORF
FBtr0071654_507	3.92119	1.68465	4.66851	5.08886	uORF
FBtr0071654_540	3.92119	1	3.44567	1.81777	uORF
FBtr0071654_642	2.46059	1	5.89134	2.63554	uORF
FBtr0071654_753	2.46059	1	5.89134	3.45331	uORF
FBtr0071654_850	5.38178	3.05396	3.44567	1.81777	uORF
FBtr0071661_169	180.653	11.2698	151.409	14.9021	uORF
FBtr0071661_221	52.1208	4.42327	41.3536	8.35994	uORF
FBtr0071661_232	62.3449	4.42327	42.5764	8.35994	uORF
FBtr0071661_99	50.6602	2.36931	30.3481	18.1732	uORF
FBtr0071663_7	2.46059	1.68465	2.22284	1	uORF
FBtr0071756_31	24.3695	44.1332	13.2284	5.08886	uORF
FBtr0071758_18	9.76356	3.73861	3.44567	2.63554	uORF
FBtr0071758_6	9.76356	4.42327	3.44567	2.63554	uORF
FBtr0071763_366	3.92119	3.05396	3.44567	4.27109	uORF
FBtr0071777_142	33.1331	44.1332	18.1197	19.8087	uORF
FBtr0071777_353	18.5271	20.1703	20.5654	5.90663	uORF
FBtr0071777_522	28.7513	7.84653	14.4512	5.90663	uORF
FBtr0071797_339	52.1208	7.16188	60.9189	42.7063	uORF
FBtr0071811_120	12.6847	11.2698	9.55985	9.17771	uORF
FBtr0071832_16	3.92119	1.68465	3.44567	2.63554	uORF
FBtr0071838_203	6.84237	6.47723	3.44567	2.63554	uORF
FBtr0071838_232	6.84237	3.05396	3.44567	1	uORF
FBtr0071838_248	9.76356	2.36931	5.89134	3.45331	uORF
FBtr0071838_389	3.92119	2.36931	7.11418	5.90663	uORF
FBtr0071838_491	8.30297	3.73861	7.11418	5.90663	uORF
FBtr0071843_5	2.46059	1	3.44567	1	uORF
FBtr0071845_126	82.7932	5.79257	48.6906	14.0843	uORF
FBtr0071845_29	47.739	3.05396	24.2339	3.45331	uORF
FBtr0071849_274	30.2119	14.6931	19.3425	9.17771	uORF
FBtr0071849_278	30.2119	16.0624	21.7882	5.90663	uORF
FBtr0071907_47	3.92119	13.3238	7.11418	17.3554	uORF
FBtr0071922_114	11.2242	3.73861	5.89134	7.54217	uORF
FBtr0072036_53	14.1453	3.05396	8.33701	5.08886	uORF
FBtr0072073_249	18.5271	3.73861	9.55985	5.08886	uORF
FBtr0072073_370	8.30297	1.68465	7.11418	9.17771	uORF
FBtr0072073_387	11.2242	1	8.33701	5.90663	uORF
FBtr0072073_66	21.4483	6.47723	12.0055	12.4488	uORF
FBtr0072073_99	28.7513	12.6391	14.4512	13.2666	uORF
FBtr0072087_379	49.1996	3.73861	36.4622	17.3554	uORF
FBtr0072087_423	52.1208	5.79257	26.6795	23.8976	uORF
FBtr0072087_517	274.131	324.156	213.773	150.652	uORF
FBtr0072087_561	60.8843	11.2698	71.9245	9.99548	uORF
FBtr0072127_102	33.1331	25.6475	14.4512	50.0663	uORF
FBtr0072131_21	151.441	29.0708	81.7072	41.0708	uORF
FBtr0072143_261	138.296	4.42327	115.947	9.99548	uORF
FBtr0072143_271	79.872	2.36931	74.3701	3.45331	uORF
FBtr0072145_140	2.46059	2.36931	7.11418	14.0843	uORF
FBtr0072145_147	2.46059	1	3.44567	2.63554	uORF
FBtr0072145_176	2.46059	2.36931	7.11418	13.2666	uORF
FBtr0072157_1018	44.8178	22.2242	31.5709	5.90663	uORF
FBtr0072157_1081	31.6725	5.79257	21.7882	5.08886	uORF
FBtr0072157_155	21.4483	7.84653	24.2339	1.81777	uORF
FBtr0072157_305	5.38178	1.68465	7.11418	2.63554	uORF
FBtr0072157_512	27.2907	5.79257	21.7882	12.4488	uORF
FBtr0072157_560	8.30297	3.05396	3.44567	5.90663	uORF
FBtr0072157_651	72.5691	7.84653	31.5709	9.99548	uORF
FBtr0072157_837	24.3695	14.0084	14.4512	17.3554	uORF
FBtr0072160_13	14.1453	3.73861	7.11418	4.27109	uORF
FBtr0072162_165	75.4903	14.6931	65.8103	21.4443	uORF
FBtr0072162_177	74.0297	11.9545	58.4733	20.6265	uORF
FBtr0072162_98	55.042	282.392	59.6961	449.956	uORF
FBtr0072163_64	71.1085	62.6188	25.4567	37.7997	uORF
FBtr0072166_127	6.84237	1.68465	5.89134	1	uORF
FBtr0072166_166	17.0665	1.68465	7.11418	2.63554	uORF
FBtr0072166_47	11.2242	22.2242	4.66851	18.991	uORF
FBtr0072166_80	11.2242	19.4856	4.66851	15.7199	uORF
FBtr0072168_56	2.46059	2.36931	2.22284	2.63554	uORF
FBtr0072177_139	63.8055	44.8178	40.1307	50.0663	uORF
FBtr0072177_243	57.9631	17.4317	27.9024	52.5196	uORF
FBtr0072195_126	21.4483	14.0084	25.4567	15.7199	uORF
FBtr0072195_76	50.6602	56.4569	43.7992	63.9684	uORF
FBtr0072195_81	28.7513	48.9257	32.7937	55.7907	uORF
FBtr0072225_60	2.46059	3.73861	2.22284	2.63554	uORF
FBtr0072227_145	52.1208	14.6931	20.5654	37.7997	uORF
FBtr0072227_242	14.1453	13.3238	13.2284	35.3464	uORF
FBtr0072227_272	27.2907	11.9545	27.9024	20.6265	uORF
FBtr0072235_26	25.8301	3.05396	14.4512	3.45331	uORF
FBtr0072235_32	25.8301	3.05396	14.4512	3.45331	uORF
FBtr0072239_103	36.0542	11.2698	37.6851	25.5331	uORF
FBtr0072239_141	21.4483	1.68465	35.2394	13.2666	uORF
FBtr0072239_17	11.2242	9.21584	9.55985	12.4488	uORF
FBtr0072239_22	47.739	8.53119	36.4622	25.5331	uORF
FBtr0072250_58	8.30297	7.84653	7.11418	9.99548	uORF
FBtr0072250_68	8.30297	3.73861	5.89134	7.54217	uORF
FBtr0072252_219	66.7267	18.801	71.9245	39.4353	uORF
FBtr0072252_81	84.2538	69.4653	113.501	69.6928	uORF
FBtr0072255_9	3.92119	1	7.11418	1	uORF
FBtr0072257_233	24.3695	18.801	24.2339	8.35994	uORF
FBtr0072257_254	15.6059	4.42327	8.33701	4.27109	uORF
FBtr0072262_187	37.5148	7.84653	21.7882	9.17771	uORF
FBtr0072285_209	3.92119	6.47723	2.22284	5.08886	uORF
FBtr0072287_81	15.6059	21.5396	5.89134	29.622	uORF
FBtr0072312_132	34.5937	7.84653	30.3481	11.631	uORF
FBtr0072312_232	30.2119	48.2411	16.8969	76.235	uORF
FBtr0072342_43	5.38178	3.73861	9.55985	10.8133	uORF
FBtr0072347_26	11.2242	1.68465	4.66851	1	uORF
FBtr0072364_317	27.2907	39.3406	15.674	38.6175	uORF
FBtr0072364_9	36.0542	11.9545	35.2394	14.0843	uORF
FBtr0072369_207	6.84237	2.36931	10.7827	1.81777	uORF
FBtr0072369_454	9.76356	5.10792	12.0055	4.27109	uORF
FBtr0072396_1064	22.9089	4.42327	24.2339	6.7244	uORF
FBtr0072396_221	6.84237	1	7.11418	1	uORF
FBtr0072396_778	30.2119	6.47723	20.5654	24.7154	uORF
FBtr0072397_153	37.5148	20.8549	37.6851	94.2259	uORF
FBtr0072397_44	40.436	23.5936	34.0166	72.1461	uORF
FBtr0072405_13	336.937	7.16188	144.072	9.17771	uORF
FBtr0072427_170	97.3992	12.6391	69.4788	63.1506	uORF
FBtr0072435_91	43.3572	17.4317	46.2449	50.0663	uORF
FBtr0072464_263	24.3695	14.6931	15.674	34.5286	uORF
FBtr0072464_274	28.7513	20.8549	24.2339	57.4262	uORF
FBtr0072480_93	3.92119	1	2.22284	1	uORF
FBtr0072515_146	9.76356	11.2698	4.66851	4.27109	uORF
FBtr0072515_194	18.5271	11.9545	15.674	15.7199	uORF
FBtr0072515_218	15.6059	8.53119	13.2284	12.4488	uORF
FBtr0072515_244	11.2242	3.73861	10.7827	1	uORF
FBtr0072515_258	17.0665	3.73861	16.8969	4.27109	uORF
FBtr0072515_303	19.9877	19.4856	19.3425	25.5331	uORF
FBtr0072515_343	8.30297	10.5851	12.0055	12.4488	uORF
FBtr0072520_147	12.6847	5.79257	3.44567	8.35994	uORF
FBtr0072520_170	9.76356	2.36931	2.22284	4.27109	uORF
FBtr0072520_186	11.2242	2.36931	5.89134	2.63554	uORF
FBtr0072529_101	6.84237	3.73861	7.11418	14.9021	uORF
FBtr0072532_515	21.4483	33.8634	9.55985	29.622	uORF
FBtr0072532_622	12.6847	3.05396	4.66851	1.81777	uORF
FBtr0072532_68	3.92119	1	2.22284	1	uORF
FBtr0072551_150	9.76356	4.42327	3.44567	8.35994	uORF
FBtr0072551_207	6.84237	1.68465	3.44567	4.27109	uORF
FBtr0072551_455	25.8301	20.1703	20.5654	25.5331	uORF
FBtr0072551_508	12.6847	1	14.4512	1	uORF
FBtr0072556_15	17.0665	3.05396	14.4512	1	uORF
FBtr0072556_266	147.059	40.7099	145.295	187.452	uORF
FBtr0072556_270	231.774	30.4401	235.784	87.6838	uORF
FBtr0072556_50	18.5271	5.10792	15.674	5.90663	uORF
FBtr0072556_9	17.0665	5.79257	14.4512	1.81777	uORF
FBtr0072562_297	12.6847	6.47723	13.2284	18.1732	uORF
FBtr0072562_470	9.76356	3.05396	13.2284	4.27109	uORF
FBtr0072589_291	2.46059	5.10792	4.66851	6.7244	uORF
FBtr0072589_351	6.84237	15.3777	7.11418	13.2666	uORF
FBtr0072593_223	27.2907	24.9629	27.9024	99.1326	uORF
FBtr0072593_234	47.739	16.0624	36.4622	80.3238	uORF
FBtr0072593_821	8.30297	3.73861	7.11418	14.9021	uORF
FBtr0072597_33	6.84237	2.36931	12.0055	1.81777	uORF
FBtr0072597_41	12.6847	12.6391	19.3425	5.90663	uORF
FBtr0072597_95	17.0665	1	13.2284	5.08886	uORF
FBtr0072627_67	19.9877	3.73861	25.4567	5.90663	uORF
FBtr0072639_178	18.5271	11.2698	9.55985	23.8976	uORF
FBtr0072639_187	18.5271	4.42327	9.55985	5.08886	uORF
FBtr0072639_340	3.92119	1	5.89134	2.63554	uORF
FBtr0072644_127	8.30297	38.6559	15.674	44.3419	uORF
FBtr0072644_133	6.84237	35.9173	12.0055	37.7997	uORF
FBtr0072644_160	6.84237	23.5936	4.66851	18.991	uORF
FBtr0072644_236	9.76356	3.05396	10.7827	7.54217	uORF
FBtr0072644_66	6.84237	8.53119	7.11418	10.8133	uORF
FBtr0072652_48	55.042	5.79257	19.3425	19.8087	uORF
FBtr0072679_125	38.9754	7.84653	30.3481	36.1642	uORF
FBtr0072703_60	9.76356	14.6931	3.44567	18.1732	uORF
FBtr0072703_66	9.76356	13.3238	3.44567	17.3554	uORF
FBtr0072703_74	11.2242	5.79257	5.89134	7.54217	uORF
FBtr0072711_59	14.1453	13.3238	4.66851	18.1732	uORF
FBtr0072729_109	6.84237	4.42327	2.22284	4.27109	uORF
FBtr0072729_24	3.92119	9.21584	5.89134	5.90663	uORF
FBtr0072729_31	3.92119	8.53119	5.89134	1.81777	uORF
FBtr0072735_168	47.739	38.6559	38.9079	41.8886	uORF
FBtr0072735_201	30.2119	15.3777	19.3425	17.3554	uORF
FBtr0072735_224	15.6059	5.79257	19.3425	5.90663	uORF
FBtr0072742_294	12.6847	1.68465	8.33701	1	uORF
FBtr0072742_315	11.2242	1	8.33701	1	uORF
FBtr0072742_95	11.2242	1	2.22284	1	uORF
FBtr0072747_111	28.7513	3.73861	75.593	103.221	uORF
FBtr0072747_1125	38.9754	7.84653	27.9024	3.45331	uORF
FBtr0072747_1279	28.7513	3.73861	40.1307	7.54217	uORF
FBtr0072747_316	24.3695	11.2698	12.0055	89.3193	uORF
FBtr0072747_322	21.4483	4.42327	12.0055	63.9684	uORF
FBtr0072747_836	49.1996	18.801	27.9024	35.3464	uORF
FBtr0072747_883	15.6059	1.68465	16.8969	12.4488	uORF
FBtr0072754_3	8.30297	1	2.22284	1	uORF
FBtr0072754_9	8.30297	1	2.22284	1	uORF
FBtr0072761_42	33.1331	1.68465	30.3481	1.81777	uORF
FBtr0072767_121	2.46059	1	3.44567	1.81777	uORF
FBtr0072767_128	6.84237	1.68465	3.44567	1	uORF
FBtr0072767_186	5.38178	1	2.22284	1	uORF
FBtr0072767_85	2.46059	7.16188	4.66851	5.90663	uORF
FBtr0072779_29	14.1453	2.36931	9.55985	7.54217	uORF
FBtr0072784_22	95.9386	11.9545	14.4512	9.17771	uORF
FBtr0072784_34	95.9386	9.21584	14.4512	5.90663	uORF
FBtr0072826_180	34.5937	43.4485	25.4567	27.1687	uORF
FBtr0072826_189	27.2907	43.4485	23.011	26.3509	uORF
FBtr0072826_192	27.2907	42.0792	23.011	26.3509	uORF
FBtr0072826_364	33.1331	7.84653	35.2394	12.4488	uORF
FBtr0072826_394	21.4483	5.79257	31.5709	9.99548	uORF
FBtr0072828_36	38.9754	3.73861	73.1473	18.1732	uORF
FBtr0072828_447	74.0297	36.602	45.0221	45.9774	uORF
FBtr0072828_461	177.732	196.126	161.191	147.381	uORF
FBtr0072831_226	114.926	19.4856	93.9355	26.3509	uORF
FBtr0072834_161	100.32	3.05396	90.267	4.27109	uORF
FBtr0072834_81	37.5148	19.4856	23.011	57.4262	uORF
FBtr0072853_110	28.7513	8.53119	35.2394	17.3554	uORF
FBtr0072853_197	139.756	161.894	97.604	126.119	uORF
FBtr0072858_148	41.8966	146.146	25.4567	127.755	uORF
FBtr0072864_65	12.6847	3.73861	12.0055	1	uORF
FBtr0072866_45	6.84237	2.36931	5.89134	5.90663	uORF
FBtr0072901_212	47.739	39.3406	38.9079	58.244	uORF
FBtr0072905_116	17.0665	7.16188	2.22284	5.08886	uORF
FBtr0072905_149	12.6847	5.10792	3.44567	3.45331	uORF
FBtr0072905_3	27.2907	11.2698	4.66851	10.8133	uORF
FBtr0072951_176	34.5937	42.7638	26.6795	16.5377	uORF
FBtr0072951_3	22.9089	2.36931	37.6851	9.17771	uORF
FBtr0072956_101	28.7513	11.9545	30.3481	19.8087	uORF
FBtr0072970_50	8.30297	5.10792	14.4512	17.3554	uORF
FBtr0072970_97	9.76356	13.3238	10.7827	6.7244	uORF
FBtr0073063_164	17.0665	11.2698	36.4622	27.9865	uORF
FBtr0073093_113	36.0542	7.84653	41.3536	9.17771	uORF
FBtr0073095_117	18.5271	6.47723	21.7882	6.7244	uORF
FBtr0073114_162	6.84237	3.73861	3.44567	2.63554	uORF
FBtr0073118_226	25.8301	4.42327	23.011	3.45331	uORF
FBtr0073118_248	52.1208	13.3238	27.9024	11.631	uORF
FBtr0073118_33	5.38178	3.73861	2.22284	5.08886	uORF
FBtr0073124_109	8.30297	7.16188	10.7827	9.17771	uORF
FBtr0073145_104	5.38178	4.42327	10.7827	9.99548	uORF
FBtr0073145_139	3.92119	3.73861	7.11418	5.08886	uORF
FBtr0073145_154	3.92119	2.36931	4.66851	1	uORF
FBtr0073145_545	79.872	29.7554	100.05	25.5331	uORF
FBtr0073157_171	119.308	7.84653	71.9245	14.9021	uORF
FBtr0073165_362	12.6847	1	64.5875	1.81777	uORF
FBtr0073165_412	31.6725	5.10792	71.9245	9.99548	uORF
FBtr0073165_418	34.5937	9.90049	75.593	18.1732	uORF
FBtr0073165_651	75.4903	25.6475	191.762	26.3509	uORF
FBtr0073165_689	56.5026	16.747	107.387	14.0843	uORF
FBtr0073165_752	18.5271	8.53119	62.1418	11.631	uORF
FBtr0073165_842	46.2784	3.73861	117.169	13.2666	uORF
FBtr0073165_962	65.2661	20.8549	71.9245	9.99548	uORF
FBtr0073166_405	43.3572	1.68465	45.0221	1	uORF
FBtr0073166_451	78.4115	18.801	108.61	30.4398	uORF
FBtr0073166_548	53.5814	12.6391	64.5875	50.8841	uORF
FBtr0073166_554	52.1208	6.47723	54.8048	9.99548	uORF
FBtr0073166_664	38.9754	14.6931	40.1307	35.3464	uORF
FBtr0073176_112	104.702	27.7015	79.2615	57.4262	uORF
FBtr0073187_553	12.6847	7.16188	7.11418	14.0843	uORF
FBtr0073203_247	6.84237	2.36931	9.55985	10.8133	uORF
FBtr0073209_160	28.7513	5.79257	41.3536	11.631	uORF
FBtr0073211_274	36.0542	1	26.6795	1.81777	uORF
FBtr0073211_417	19.9877	29.0708	31.5709	45.1597	uORF
FBtr0073211_94	19.9877	4.42327	12.0055	14.0843	uORF
FBtr0073215_201	15.6059	4.42327	8.33701	4.27109	uORF
FBtr0073217_151	27.2907	11.9545	29.1252	7.54217	uORF
FBtr0073217_47	24.3695	11.9545	18.1197	19.8087	uORF
FBtr0073217_54	22.9089	11.2698	15.674	18.1732	uORF
FBtr0073217_76	44.8178	16.0624	49.9134	14.0843	uORF
FBtr0073245_203	5.38178	1	8.33701	6.7244	uORF
FBtr0073271_221	8.30297	3.73861	10.7827	4.27109	uORF
FBtr0073271_443	33.1331	1.68465	20.5654	2.63554	uORF
FBtr0073271_634	25.8301	8.53119	13.2284	9.99548	uORF
FBtr0073271_642	15.6059	4.42327	8.33701	3.45331	uORF
FBtr0073271_675	27.2907	7.16188	18.1197	10.8133	uORF
FBtr0073271_801	21.4483	6.47723	18.1197	11.631	uORF
FBtr0073283_112	17.0665	4.42327	3.44567	3.45331	uORF
FBtr0073299_206	40.436	9.90049	31.5709	62.3329	uORF
FBtr0073337_1203	152.902	29.7554	119.615	41.8886	uORF
FBtr0073337_1216	192.338	104.383	173.42	117.941	uORF
FBtr0073337_603	22.9089	5.10792	20.5654	6.7244	uORF
FBtr0073337_913	79.872	6.47723	78.0386	4.27109	uORF
FBtr0073381_160	9.76356	4.42327	12.0055	1.81777	uORF
FBtr0073387_40	154.362	20.1703	63.3646	54.1551	uORF
FBtr0073393_121	5.38178	3.05396	3.44567	8.35994	uORF
FBtr0073393_134	17.0665	9.21584	2.22284	10.8133	uORF
FBtr0073422_155	28.7513	1.68465	13.2284	1	uORF
FBtr0073422_176	17.0665	1	9.55985	1	uORF
FBtr0073448_85	27.2907	16.0624	32.7937	14.0843	uORF
FBtr0073453_224	27.2907	1	31.5709	2.63554	uORF
FBtr0073453_651	5.38178	1.68465	5.89134	5.08886	uORF
FBtr0073454_144	25.8301	5.10792	31.5709	10.8133	uORF
FBtr0073454_83	30.2119	3.73861	20.5654	5.08886	uORF
FBtr0073457_344	24.3695	3.73861	19.3425	6.7244	uORF
FBtr0073457_523	8.30297	1.68465	9.55985	2.63554	uORF
FBtr0073475_118	19.9877	6.47723	9.55985	9.17771	uORF
FBtr0073480_53	44.8178	4.42327	14.4512	32.0753	uORF
FBtr0073480_58	57.9631	10.5851	19.3425	40.253	uORF
FBtr0073499_77	9.76356	3.73861	7.11418	1.81777	uORF
FBtr0073503_335	79.872	29.7554	37.6851	61.5151	uORF
FBtr0073521_370	44.8178	3.05396	20.5654	3.45331	uORF
FBtr0073521_624	19.9877	29.7554	16.8969	5.08886	uORF
FBtr0073542_111	11.2242	7.16188	20.5654	10.8133	uORF
FBtr0073552_178	12.6847	14.0084	3.44567	1.81777	uORF
FBtr0073552_215	21.4483	9.90049	12.0055	1.81777	uORF
FBtr0073580_124	6.84237	2.36931	9.55985	5.08886	uORF
FBtr0073580_231	6.84237	1	5.89134	10.8133	uORF
FBtr0073580_249	6.84237	1	4.66851	8.35994	uORF
FBtr0073580_279	3.92119	1	3.44567	2.63554	uORF
FBtr0073580_286	2.46059	1	7.11418	3.45331	uORF
FBtr0073580_292	2.46059	1	5.89134	3.45331	uORF
FBtr0073580_354	2.46059	2.36931	4.66851	3.45331	uORF
FBtr0073580_373	6.84237	5.79257	12.0055	33.7109	uORF
FBtr0073580_395	5.38178	5.10792	8.33701	26.3509	uORF
FBtr0073580_470	11.2242	5.10792	15.674	14.0843	uORF
FBtr0073607_223	68.1873	15.3777	89.0442	35.3464	uORF
FBtr0073620_281	41.8966	16.0624	30.3481	14.0843	uORF
FBtr0073620_331	34.5937	9.90049	43.7992	21.4443	uORF
FBtr0073641_290	49.1996	9.21584	12.0055	26.3509	uORF
FBtr0073641_84	40.436	16.0624	16.8969	30.4398	uORF
FBtr0073658_2	14.1453	4.42327	4.66851	2.63554	uORF
FBtr0073658_27	12.6847	3.05396	2.22284	2.63554	uORF
FBtr0073678_170	12.6847	5.10792	5.89134	18.1732	uORF
FBtr0073678_244	15.6059	1.68465	14.4512	1.81777	uORF
FBtr0073678_268	14.1453	1	15.674	2.63554	uORF
FBtr0073678_311	3.92119	15.3777	7.11418	32.0753	uORF
FBtr0073678_356	8.30297	1	9.55985	1	uORF
FBtr0073678_397	19.9877	4.42327	25.4567	11.631	uORF
FBtr0073678_828	53.5814	1	58.4733	1	uORF
FBtr0073683_157	22.9089	17.4317	13.2284	29.622	uORF
FBtr0073692_123	18.5271	1.68465	3.44567	5.08886	uORF
FBtr0073694_172	135.375	2.36931	62.1418	5.90663	uORF
FBtr0073705_30	176.271	11.9545	58.4733	18.1732	uORF
FBtr0073712_1019	17.0665	3.05396	56.0276	14.0843	uORF
FBtr0073712_1023	12.6847	1	19.3425	4.27109	uORF
FBtr0073712_149	21.4483	5.10792	13.2284	1	uORF
FBtr0073712_657	15.6059	1	14.4512	1	uORF
FBtr0073720_183	6.84237	6.47723	16.8969	12.4488	uORF
FBtr0073730_22	63.8055	4.42327	26.6795	16.5377	uORF
FBtr0073747_168	37.5148	3.05396	34.0166	12.4488	uORF
FBtr0073747_258	25.8301	1.68465	14.4512	2.63554	uORF
FBtr0073747_290	15.6059	5.10792	9.55985	2.63554	uORF
FBtr0073747_303	22.9089	4.42327	14.4512	1.81777	uORF
FBtr0073747_414	46.2784	7.84653	36.4622	11.631	uORF
FBtr0073754_73	34.5937	80.4198	35.2394	305.211	uORF
FBtr0073787_165	14.1453	5.10792	7.11418	9.99548	uORF
FBtr0073787_174	19.9877	9.90049	8.33701	5.08886	uORF
FBtr0073840_216	65.2661	1	41.3536	1	uORF
FBtr0073842_120	33.1331	1	27.9024	1	uORF
FBtr0073843_167	34.5937	24.9629	29.1252	18.991	uORF
FBtr0073843_175	31.6725	22.2242	24.2339	18.991	uORF
FBtr0073843_185	30.2119	20.1703	20.5654	14.9021	uORF
FBtr0073844_288	17.0665	7.84653	4.66851	18.1732	uORF
FBtr0073844_297	15.6059	5.10792	4.66851	13.2666	uORF
FBtr0073908_138	141.217	106.437	65.8103	388.624	uORF
FBtr0073913_123	28.7513	8.53119	14.4512	5.90663	uORF
FBtr0073913_564	25.8301	3.73861	14.4512	2.63554	uORF
FBtr0073923_482	161.665	43.4485	139.18	30.4398	uORF
FBtr0073939_26	17.0665	2.36931	5.89134	5.08886	uORF
FBtr0073939_294	8.30297	1.68465	4.66851	4.27109	uORF
FBtr0073939_300	15.6059	4.42327	5.89134	13.2666	uORF
FBtr0073940_272	12.6847	3.73861	15.674	8.35994	uORF
FBtr0073970_117	3.92119	2.36931	5.89134	1.81777	uORF
FBtr0073970_82	6.84237	35.9173	9.55985	28.8042	uORF
FBtr0073992_119	59.4237	71.5193	47.4678	90.9548	uORF
FBtr0074053_172	56.5026	11.9545	40.1307	18.991	uORF
FBtr0074053_71	33.1331	7.16188	23.011	18.991	uORF
FBtr0074053_83	31.6725	5.10792	23.011	10.8133	uORF
FBtr0074063_399	8.30297	7.16188	9.55985	7.54217	uORF
FBtr0074063_502	2.46059	1.68465	10.7827	31.2575	uORF
FBtr0074085_144	135.375	37.2866	111.055	72.9639	uORF
FBtr0074104_53	8.30297	2.36931	4.66851	11.631	uORF
FBtr0074106_147	78.4115	12.6391	68.256	32.0753	uORF
FBtr0074106_187	149.981	43.4485	114.724	121.212	uORF
FBtr0074106_37	82.7932	17.4317	76.8158	45.1597	uORF
FBtr0074114_152	5.38178	1.68465	10.7827	5.08886	uORF
FBtr0074114_158	8.30297	2.36931	12.0055	1.81777	uORF
FBtr0074114_275	6.84237	5.79257	7.11418	5.90663	uORF
FBtr0074114_34	2.46059	1	2.22284	5.08886	uORF
FBtr0074114_366	28.7513	1	12.0055	2.63554	uORF
FBtr0074114_401	27.2907	14.6931	15.674	20.6265	uORF
FBtr0074114_464	65.2661	26.3322	47.4678	18.991	uORF
FBtr0074114_545	50.6602	14.0084	29.1252	12.4488	uORF
FBtr0074114_74	9.76356	1.68465	2.22284	1.81777	uORF
FBtr0074114_90	19.9877	21.5396	5.89134	21.4443	uORF
FBtr0074125_199	27.2907	11.9545	21.7882	24.7154	uORF
FBtr0074125_252	22.9089	5.10792	13.2284	8.35994	uORF
FBtr0074125_274	6.84237	1	4.66851	1	uORF
FBtr0074135_107	11.2242	3.73861	13.2284	8.35994	uORF
FBtr0074140_109	2.46059	4.42327	2.22284	18.991	uORF
FBtr0074140_267	22.9089	6.47723	16.8969	5.08886	uORF
FBtr0074140_98	5.38178	5.10792	3.44567	23.8976	uORF
FBtr0074144_15	34.5937	1.68465	20.5654	4.27109	uORF
FBtr0074144_361	224.471	999.224	151.409	846.576	uORF
FBtr0074144_448	167.508	697.292	122.061	580.8	uORF
FBtr0074144_46	37.5148	6.47723	52.3591	45.9774	uORF
FBtr0074144_525	55.042	19.4856	58.4733	50.0663	uORF
FBtr0074144_829	237.616	192.018	140.403	239.789	uORF
FBtr0074153_134	21.4483	5.79257	15.674	6.7244	uORF
FBtr0074153_144	19.9877	3.73861	14.4512	1.81777	uORF
FBtr0074153_176	17.0665	2.36931	5.89134	2.63554	uORF
FBtr0074153_274	21.4483	55.7723	14.4512	66.4217	uORF
FBtr0074153_284	34.5937	133.823	32.7937	114.67	uORF
FBtr0074153_316	19.9877	3.05396	20.5654	14.9021	uORF
FBtr0074159_149	15.6059	7.16188	20.5654	9.99548	uORF
FBtr0074159_73	18.5271	26.3322	10.7827	58.244	uORF
FBtr0074166_126	30.2119	5.10792	16.8969	20.6265	uORF
FBtr0074166_166	91.5568	125.607	51.1363	167.825	uORF
FBtr0074166_206	144.138	14.0084	78.0386	32.8931	uORF
FBtr0074166_9	12.6847	1.68465	7.11418	5.08886	uORF
FBtr0074167_116	37.5148	11.9545	14.4512	13.2666	uORF
FBtr0074167_133	57.9631	10.5851	51.1363	9.99548	uORF
FBtr0074167_185	6.84237	1.68465	7.11418	2.63554	uORF
FBtr0074167_19	3.92119	2.36931	2.22284	1.81777	uORF
FBtr0074167_193	22.9089	8.53119	30.3481	8.35994	uORF
FBtr0074167_273	3.92119	2.36931	9.55985	4.27109	uORF
FBtr0074167_281	12.6847	1.68465	12.0055	1	uORF
FBtr0074167_70	2.46059	1	3.44567	1	uORF
FBtr0074167_95	37.5148	14.0084	16.8969	19.8087	uORF
FBtr0074169_202	224.471	182.433	92.7127	97.497	uORF
FBtr0074169_311	110.545	58.5109	38.9079	41.0708	uORF
FBtr0074169_50	22.9089	21.5396	7.11418	18.991	uORF
FBtr0074169_85	18.5271	1.68465	9.55985	5.90663	uORF
FBtr0074174_104	22.9089	5.79257	32.7937	68.875	uORF
FBtr0074174_123	3.92119	2.36931	3.44567	6.7244	uORF
FBtr0074174_21	33.1331	19.4856	9.55985	35.3464	uORF
FBtr0074174_212	43.3572	37.9713	35.2394	68.0573	uORF
FBtr0074174_314	17.0665	3.05396	15.674	9.99548	uORF
FBtr0074174_332	57.9631	9.21584	25.4567	21.4443	uORF
FBtr0074174_36	31.6725	19.4856	9.55985	35.3464	uORF
FBtr0074174_407	37.5148	24.9629	45.0221	23.0798	uORF
FBtr0074174_414	91.5568	101.644	89.0442	120.395	uORF
FBtr0074174_421	87.175	89.3203	85.3757	113.852	uORF
FBtr0074174_435	78.4115	76.3119	70.7016	101.586	uORF
FBtr0074174_499	21.4483	12.6391	30.3481	22.2621	uORF
FBtr0074178_3	6.84237	1.68465	2.22284	1.81777	uORF
FBtr0074179_179	38.9754	65.3574	16.8969	54.9729	uORF
FBtr0074184_149	18.5271	1	21.7882	66.4217	uORF
FBtr0074185_184	2.46059	1	2.22284	1	uORF
FBtr0074185_220	3.92119	1	4.66851	1	uORF
FBtr0074185_229	3.92119	1	3.44567	1	uORF
FBtr0074185_235	2.46059	1	3.44567	1	uORF
FBtr0074209_65	68.1873	12.6391	48.6906	45.1597	uORF
FBtr0074237_146	57.9631	41.3945	36.4622	102.404	uORF
FBtr0074240_17	98.8598	3.05396	82.93	4.27109	uORF
FBtr0074250_254	9.76356	3.73861	9.55985	3.45331	uORF
FBtr0074250_269	12.6847	4.42327	12.0055	13.2666	uORF
FBtr0074250_282	12.6847	8.53119	14.4512	19.8087	uORF
FBtr0074255_400	5.38178	1.68465	32.7937	3.45331	uORF
FBtr0074255_406	5.38178	1.68465	25.4567	2.63554	uORF
FBtr0074255_459	38.9754	22.2242	57.2504	14.0843	uORF
FBtr0074255_545	12.6847	5.10792	18.1197	10.8133	uORF
FBtr0074255_569	21.4483	23.5936	34.0166	63.9684	uORF
FBtr0074255_807	12.6847	8.53119	9.55985	12.4488	uORF
FBtr0074255_944	17.0665	11.9545	49.9134	26.3509	uORF
FBtr0074255_952	38.9754	3.73861	86.5985	7.54217	uORF
FBtr0074261_100	53.5814	70.15	25.4567	78.6883	uORF
FBtr0074261_142	40.436	63.9881	19.3425	65.6039	uORF
FBtr0074261_92	15.6059	5.10792	9.55985	3.45331	uORF
FBtr0074268_146	2.46059	1	2.22284	1.81777	uORF
FBtr0074268_235	2.46059	1	2.22284	1	uORF
FBtr0074268_243	3.92119	1.68465	3.44567	1	uORF
FBtr0074268_60	2.46059	1	2.22284	1.81777	uORF
FBtr0074286_533	30.2119	5.79257	29.1252	21.4443	uORF
FBtr0074286_736	30.2119	11.9545	15.674	5.90663	uORF
FBtr0074294_116	24.3695	20.1703	31.5709	22.2621	uORF
FBtr0074315_81	2.46059	1	2.22284	1	uORF
FBtr0074344_571	24.3695	3.73861	15.674	8.35994	uORF
FBtr0074344_644	18.5271	144.777	9.55985	50.8841	uORF
FBtr0074357_100	11.2242	1	15.674	4.27109	uORF
FBtr0074357_106	11.2242	1	15.674	4.27109	uORF
FBtr0074357_115	11.2242	1	13.2284	1.81777	uORF
FBtr0074357_126	18.5271	4.42327	18.1197	5.08886	uORF
FBtr0074357_154	24.3695	6.47723	21.7882	9.17771	uORF
FBtr0074359_379	12.6847	11.2698	2.22284	1	uORF
FBtr0074359_385	11.2242	9.90049	13.2284	11.631	uORF
FBtr0074359_427	28.7513	2.36931	37.6851	7.54217	uORF
FBtr0074359_61	12.6847	1.68465	4.66851	1	uORF
FBtr0074365_206	22.9089	4.42327	16.8969	10.8133	uORF
FBtr0074365_67	17.0665	5.79257	12.0055	5.08886	uORF
FBtr0074383_113	14.1453	10.5851	5.89134	14.0843	uORF
FBtr0074476_264	11.2242	2.36931	3.44567	1.81777	uORF
FBtr0074476_330	30.2119	3.73861	14.4512	17.3554	uORF
FBtr0074487_355	12.6847	13.3238	12.0055	16.5377	uORF
FBtr0074530_93	3.92119	1	2.22284	1	uORF
FBtr0074555_104	21.4483	12.6391	14.4512	13.2666	uORF
FBtr0074555_334	36.0542	20.8549	34.0166	18.1732	uORF
FBtr0074609_146	2.46059	1.68465	3.44567	1	uORF
FBtr0074609_332	27.2907	7.16188	8.33701	29.622	uORF
FBtr0074612_87	22.9089	14.0084	9.55985	4.27109	uORF
FBtr0074617_143	43.3572	6.47723	52.3591	25.5331	uORF
FBtr0074617_159	49.1996	10.5851	31.5709	18.1732	uORF
FBtr0074617_355	27.2907	1	18.1197	2.63554	uORF
FBtr0074617_363	33.1331	4.42327	25.4567	3.45331	uORF
FBtr0074622_160	68.1873	8.53119	24.2339	3.45331	uORF
FBtr0074623_147	5.38178	9.21584	5.89134	10.8133	uORF
FBtr0074623_308	9.76356	7.16188	13.2284	12.4488	uORF
FBtr0074623_425	6.84237	2.36931	9.55985	5.90663	uORF
FBtr0074623_60	12.6847	27.0168	8.33701	37.7997	uORF
FBtr0074623_63	12.6847	27.0168	8.33701	37.7997	uORF
FBtr0074623_96	8.30297	20.8549	5.89134	32.8931	uORF
FBtr0074635_11	14.1453	19.4856	5.89134	7.54217	uORF
FBtr0074635_22	27.2907	15.3777	7.11418	22.2621	uORF
FBtr0074647_140	43.3572	14.0084	13.2284	8.35994	uORF
FBtr0074666_52	17.0665	11.2698	5.89134	20.6265	uORF
FBtr0074684_456	15.6059	3.73861	13.2284	5.08886	uORF
FBtr0074684_600	19.9877	18.1163	7.11418	22.2621	uORF
FBtr0074684_623	12.6847	3.05396	4.66851	11.631	uORF
FBtr0074684_728	9.76356	8.53119	8.33701	9.99548	uORF
FBtr0074684_844	3.92119	3.05396	5.89134	13.2666	uORF
FBtr0074695_59	133.914	34.548	157.523	62.3329	uORF
FBtr0074695_68	129.532	34.548	150.186	58.244	uORF
FBtr0074707_132	24.3695	4.42327	16.8969	9.99548	uORF
FBtr0074707_503	9.76356	4.42327	4.66851	8.35994	uORF
FBtr0074707_555	18.5271	27.7015	9.55985	12.4488	uORF
FBtr0074707_677	11.2242	4.42327	8.33701	7.54217	uORF
FBtr0074707_84	33.1331	9.90049	21.7882	30.4398	uORF
FBtr0074711_28	5.38178	1	2.22284	1.81777	uORF
FBtr0074721_272	33.1331	3.73861	16.8969	5.08886	uORF
FBtr0074721_320	17.0665	2.36931	13.2284	2.63554	uORF
FBtr0074721_361	12.6847	1.68465	8.33701	1.81777	uORF
FBtr0074721_414	18.5271	3.73861	2.22284	9.17771	uORF
FBtr0074721_650	11.2242	20.8549	20.5654	22.2621	uORF
FBtr0074750_59	15.6059	18.801	21.7882	23.8976	uORF
FBtr0074759_101	3.92119	3.05396	13.2284	5.90663	uORF
FBtr0074760_43	27.2907	18.1163	21.7882	12.4488	uORF
FBtr0074771_104	40.436	52.349	35.2394	61.5151	uORF
FBtr0074771_157	171.889	50.295	124.506	61.5151	uORF
FBtr0074771_321	152.902	23.5936	128.175	23.8976	uORF
FBtr0074771_334	41.8966	14.0084	34.0166	12.4488	uORF
FBtr0074771_344	40.436	14.6931	26.6795	3.45331	uORF
FBtr0074771_491	31.6725	1	25.4567	1	uORF
FBtr0074771_95	22.9089	7.84653	27.9024	14.0843	uORF
FBtr0074775_149	8.30297	7.84653	10.7827	5.08886	uORF
FBtr0074775_4	3.92119	1	2.22284	1	uORF
FBtr0074788_474	31.6725	31.1247	59.6961	32.8931	uORF
FBtr0074788_496	12.6847	12.6391	27.9024	7.54217	uORF
FBtr0074795_141	27.2907	13.3238	10.7827	33.7109	uORF
FBtr0074800_103	5.38178	6.47723	4.66851	4.27109	uORF
FBtr0074800_114	3.92119	1	3.44567	1	uORF
FBtr0074800_296	34.5937	38.6559	24.2339	18.991	uORF
FBtr0074800_43	8.30297	8.53119	5.89134	5.90663	uORF
FBtr0074840_126	161.665	85.897	98.8269	142.474	uORF
FBtr0074841_21	49.1996	8.53119	20.5654	36.9819	uORF
FBtr0074841_344	47.739	22.9089	31.5709	93.4082	uORF
FBtr0074841_418	57.9631	22.9089	27.9024	20.6265	uORF
FBtr0074841_430	53.5814	16.0624	26.6795	17.3554	uORF
FBtr0074841_57	44.8178	7.16188	15.674	35.3464	uORF
FBtr0074846_74	11.2242	10.5851	10.7827	13.2666	uORF
FBtr0074850_142	18.5271	1	20.5654	1.81777	uORF
FBtr0074850_153	18.5271	9.90049	20.5654	8.35994	uORF
FBtr0074850_229	6.84237	3.05396	7.11418	5.08886	uORF
FBtr0074850_51	5.38178	3.05396	5.89134	9.99548	uORF
FBtr0074870_182	88.6356	26.3322	68.256	36.9819	uORF
FBtr0074870_193	72.5691	11.2698	51.1363	20.6265	uORF
FBtr0074870_228	60.8843	9.90049	69.4788	14.0843	uORF
FBtr0074870_408	59.4237	10.5851	54.8048	20.6265	uORF
FBtr0074870_87	38.9754	57.1416	32.7937	78.6883	uORF
FBtr0074873_100	57.9631	168.055	23.011	256.145	uORF
FBtr0074873_173	55.042	90.6896	27.9024	63.9684	uORF
FBtr0074881_55	40.436	19.4856	3.44567	6.7244	uORF
FBtr0074882_119	50.6602	3.73861	34.0166	20.6265	uORF
FBtr0074882_292	30.2119	8.53119	25.4567	27.9865	uORF
FBtr0074882_81	5.38178	5.79257	8.33701	2.63554	uORF
FBtr0074882_93	25.8301	5.10792	45.0221	24.7154	uORF
FBtr0074891_115	15.6059	10.5851	7.11418	38.6175	uORF
FBtr0074891_6	3.92119	1	4.66851	1	uORF
FBtr0074900_153	30.2119	42.7638	37.6851	162.101	uORF
FBtr0074900_216	30.2119	55.7723	24.2339	160.465	uORF
FBtr0074900_87	47.739	140.669	54.8048	338.74	uORF
FBtr0074902_123	120.769	309.779	65.8103	336.286	uORF
FBtr0074902_138	104.702	277.6	47.4678	317.478	uORF
FBtr0074902_181	72.5691	29.0708	36.4622	66.4217	uORF
FBtr0074902_226	33.1331	11.2698	23.011	22.2621	uORF
FBtr0074903_22	53.5814	107.121	14.4512	189.087	uORF
FBtr0074903_29	43.3572	83.843	12.0055	115.488	uORF
FBtr0074903_36	38.9754	24.9629	9.55985	44.3419	uORF
FBtr0074908_77	6.84237	1	3.44567	1	uORF
FBtr0074920_164	19.9877	4.42327	15.674	10.8133	uORF
FBtr0074920_185	19.9877	1.68465	15.674	6.7244	uORF
FBtr0074921_373	82.7932	24.9629	34.0166	45.9774	uORF
FBtr0074921_401	60.8843	22.2242	24.2339	29.622	uORF
FBtr0074924_58	11.2242	3.73861	9.55985	16.5377	uORF
FBtr0074924_78	19.9877	13.3238	14.4512	18.1732	uORF
FBtr0074949_82	71.1085	1	69.4788	1	uORF
FBtr0074953_380	30.2119	4.42327	16.8969	9.17771	uORF
FBtr0074963_154	8.30297	28.3861	5.89134	27.1687	uORF
FBtr0074963_177	28.7513	14.6931	12.0055	5.08886	uORF
FBtr0074963_246	15.6059	5.79257	10.7827	15.7199	uORF
FBtr0075019_57	8.30297	23.5936	8.33701	27.1687	uORF
FBtr0075049_248	22.9089	7.84653	31.5709	15.7199	uORF
FBtr0075049_32	21.4483	3.05396	16.8969	1.81777	uORF
FBtr0075049_417	33.1331	1	31.5709	4.27109	uORF
FBtr0075049_638	37.5148	23.5936	27.9024	39.4353	uORF
FBtr0075049_662	33.1331	18.1163	26.6795	36.9819	uORF
FBtr0075049_666	43.3572	20.8549	43.7992	36.1642	uORF
FBtr0075049_737	9.76356	3.05396	7.11418	14.0843	uORF
FBtr0075064_165	11.2242	12.6391	10.7827	5.90663	uORF
FBtr0075077_261	40.436	14.0084	46.2449	14.9021	uORF
FBtr0075077_67	41.8966	10.5851	81.7072	23.0798	uORF
FBtr0075081_115	5.38178	2.36931	3.44567	1.81777	uORF
FBtr0075086_1134	36.0542	15.3777	2.22284	1	uORF
FBtr0075086_1148	36.0542	14.0084	2.22284	1	uORF
FBtr0075086_1196	15.6059	7.84653	2.22284	1	uORF
FBtr0075086_695	38.9754	7.84653	2.22284	1	uORF
FBtr0075086_733	68.1873	15.3777	2.22284	1	uORF
FBtr0075086_786	60.8843	23.5936	2.22284	1	uORF
FBtr0075086_904	46.2784	5.79257	3.44567	1	uORF
FBtr0075140_139	147.059	4.42327	103.718	7.54217	uORF
FBtr0075140_153	182.114	7.16188	136.735	21.4443	uORF
FBtr0075153_383	11.2242	2.36931	3.44567	10.8133	uORF
FBtr0075153_387	14.1453	3.05396	3.44567	5.08886	uORF
FBtr0075153_889	15.6059	17.4317	9.55985	15.7199	uORF
FBtr0075161_94	22.9089	38.6559	7.11418	27.9865	uORF
FBtr0075173_295	11.2242	3.73861	8.33701	2.63554	uORF
FBtr0075173_481	14.1453	18.1163	13.2284	22.2621	uORF
FBtr0075173_510	12.6847	20.1703	9.55985	16.5377	uORF
FBtr0075208_44	8.30297	1.68465	3.44567	2.63554	uORF
FBtr0075220_56	31.6725	22.9089	9.55985	50.8841	uORF
FBtr0075222_238	164.586	2.36931	118.392	1.81777	uORF
FBtr0075232_127	11.2242	1.68465	3.44567	2.63554	uORF
FBtr0075241_161	11.2242	4.42327	8.33701	42.7063	uORF
FBtr0075293_95	34.5937	20.8549	21.7882	22.2621	uORF
FBtr0075369_1	243.459	13.3238	117.169	66.4217	uORF
FBtr0075412_255	183.574	9.21584	126.952	32.0753	uORF
FBtr0075437_16	18.5271	2.36931	9.55985	5.08886	uORF
FBtr0075457_138	14.1453	41.3945	7.11418	184.999	uORF
FBtr0075499_175	18.5271	48.2411	45.0221	67.2395	uORF
FBtr0075499_206	88.6356	70.8346	90.267	99.9503	uORF
FBtr0075505_111	6.84237	14.6931	8.33701	18.1732	uORF
FBtr0075547_91	2.46059	1	3.44567	1	uORF
FBtr0075562_135	49.1996	63.9881	16.8969	2.63554	uORF
FBtr0075562_153	36.0542	55.0876	16.8969	2.63554	uORF
FBtr0075562_198	27.2907	27.0168	10.7827	1	uORF
FBtr0075614_109	2.46059	1	2.22284	1.81777	uORF
FBtr0075614_392	2.46059	4.42327	4.66851	2.63554	uORF
FBtr0075626_159	25.8301	23.5936	7.11418	21.4443	uORF
FBtr0075626_171	21.4483	20.8549	7.11418	17.3554	uORF
FBtr0075626_219	19.9877	1	5.89134	1	uORF
FBtr0075626_291	28.7513	7.84653	15.674	8.35994	uORF
FBtr0075626_30	22.9089	3.73861	5.89134	3.45331	uORF
FBtr0075626_72	17.0665	5.79257	3.44567	9.17771	uORF
FBtr0075679_125	19.9877	1	12.0055	2.63554	uORF
FBtr0075679_191	12.6847	5.79257	12.0055	5.08886	uORF
FBtr0075679_222	8.30297	8.53119	10.7827	3.45331	uORF
FBtr0075695_443	88.6356	113.283	16.8969	56.6085	uORF
FBtr0075695_452	82.7932	88.6356	16.8969	56.6085	uORF
FBtr0075724_281	44.8178	12.6391	47.4678	39.4353	uORF
FBtr0075724_289	25.8301	1.68465	25.4567	5.90663	uORF
FBtr0075756_99	49.1996	22.2242	32.7937	39.4353	uORF
FBtr0075759_83	9.76356	3.05396	4.66851	1.81777	uORF
FBtr0075768_129	8.30297	3.73861	5.89134	6.7244	uORF
FBtr0075768_154	9.76356	20.1703	2.22284	3.45331	uORF
FBtr0075768_418	11.2242	11.9545	2.22284	10.8133	uORF
FBtr0075775_121	129.532	19.4856	84.1528	26.3509	uORF
FBtr0075775_670	47.739	9.90049	35.2394	18.1732	uORF
FBtr0075784_177	2.46059	1.68465	3.44567	1	uORF
FBtr0075784_183	5.38178	1	7.11418	1	uORF
FBtr0075784_55	3.92119	5.10792	2.22284	14.0843	uORF
FBtr0075784_87	5.38178	29.7554	3.44567	32.8931	uORF
FBtr0075898_105	19.9877	20.1703	10.7827	12.4488	uORF
FBtr0075929_127	12.6847	3.05396	3.44567	2.63554	uORF
FBtr0075935_133	11.2242	7.16188	10.7827	12.4488	uORF
FBtr0075935_154	8.30297	2.36931	7.11418	6.7244	uORF
FBtr0075935_242	17.0665	9.90049	36.4622	27.9865	uORF
FBtr0075935_322	14.1453	12.6391	14.4512	13.2666	uORF
FBtr0075935_42	12.6847	3.05396	5.89134	2.63554	uORF
FBtr0075935_85	8.30297	3.05396	8.33701	9.17771	uORF
FBtr0075942_227	24.3695	18.1163	8.33701	12.4488	uORF
FBtr0075942_241	101.781	24.9629	49.9134	25.5331	uORF
FBtr0075942_247	101.781	23.5936	49.9134	24.7154	uORF
FBtr0075942_266	38.9754	3.05396	21.7882	1.81777	uORF
FBtr0075942_99	34.5937	8.53119	30.3481	53.3374	uORF
FBtr0075968_57	40.436	3.05396	25.4567	4.27109	uORF
FBtr0075981_139	78.4115	9.21584	19.3425	3.45331	uORF
FBtr0075982_176	11.2242	8.53119	13.2284	2.63554	uORF
FBtr0075997_100	84.2538	35.2327	63.3646	77.8705	uORF
FBtr0075998_287	3.92119	9.21584	2.22284	27.1687	uORF
FBtr0076093_396	38.9754	5.79257	40.1307	9.99548	uORF
FBtr0076093_478	27.2907	11.2698	21.7882	66.4217	uORF
FBtr0076093_604	14.1453	3.73861	12.0055	1	uORF
FBtr0076093_619	11.2242	3.73861	12.0055	22.2621	uORF
FBtr0076133_346	21.4483	7.16188	48.6906	24.7154	uORF
FBtr0076133_450	14.1453	1.68465	24.2339	2.63554	uORF
FBtr0076165_103	28.7513	22.9089	26.6795	7.54217	uORF
FBtr0076165_108	27.2907	26.3322	24.2339	9.17771	uORF
FBtr0076168_177	46.2784	10.5851	57.2504	54.1551	uORF
FBtr0076168_235	93.0174	16.747	114.724	98.3148	uORF
FBtr0076168_365	56.5026	9.90049	52.3591	62.3329	uORF
FBtr0076168_72	59.4237	7.84653	59.6961	18.991	uORF
FBtr0076186_39	6.84237	3.73861	4.66851	4.27109	uORF
FBtr0076189_1	2.46059	1.68465	3.44567	2.63554	uORF
FBtr0076189_384	62.3449	63.3034	58.4733	41.8886	uORF
FBtr0076189_420	46.2784	57.8262	42.5764	30.4398	uORF
FBtr0076189_454	25.8301	15.3777	26.6795	8.35994	uORF
FBtr0076189_471	22.9089	7.16188	16.8969	7.54217	uORF
FBtr0076189_621	100.32	33.1787	51.1363	34.5286	uORF
FBtr0076189_626	24.3695	2.36931	16.8969	5.08886	uORF
FBtr0076189_713	142.678	34.548	80.4843	29.622	uORF
FBtr0076236_247	31.6725	6.47723	14.4512	27.1687	uORF
FBtr0076236_262	27.2907	5.79257	12.0055	21.4443	uORF
FBtr0076236_287	19.9877	1	9.55985	2.63554	uORF
FBtr0076236_547	14.1453	1.68465	9.55985	3.45331	uORF
FBtr0076236_632	12.6847	2.36931	5.89134	1.81777	uORF
FBtr0076236_691	9.76356	9.21584	7.11418	13.2666	uORF
FBtr0076236_930	17.0665	13.3238	14.4512	23.8976	uORF
FBtr0076277_154	11.2242	7.16188	12.0055	5.90663	uORF
FBtr0076382_104	5.38178	5.79257	4.66851	4.27109	uORF
FBtr0076382_63	6.84237	5.79257	8.33701	1.81777	uORF
FBtr0076413_83	19.9877	9.90049	16.8969	13.2666	uORF
FBtr0076416_35	69.6479	19.4856	79.2615	28.8042	uORF
FBtr0076461_12	6.84237	2.36931	2.22284	9.17771	uORF
FBtr0076468_102	12.6847	7.84653	4.66851	7.54217	uORF
FBtr0076468_197	17.0665	50.295	7.11418	46.7952	uORF
FBtr0076468_301	8.30297	4.42327	8.33701	8.35994	uORF
FBtr0076468_317	5.38178	1	4.66851	1	uORF
FBtr0076468_361	5.38178	3.05396	7.11418	5.08886	uORF
FBtr0076468_45	15.6059	30.4401	8.33701	17.3554	uORF
FBtr0076468_72	15.6059	19.4856	7.11418	14.0843	uORF
FBtr0076494_300	12.6847	5.79257	13.2284	9.17771	uORF
FBtr0076494_430	14.1453	2.36931	8.33701	6.7244	uORF
FBtr0076494_575	19.9877	3.73861	13.2284	8.35994	uORF
FBtr0076494_97	6.84237	5.79257	3.44567	9.99548	uORF
FBtr0076520_97	15.6059	8.53119	15.674	4.27109	uORF
FBtr0076530_26	341.318	171.479	554.945	763.163	uORF
FBtr0076553_16	53.5814	32.494	45.0221	42.7063	uORF
FBtr0076583_273	43.3572	15.3777	18.1197	37.7997	uORF
FBtr0076583_278	37.5148	9.21584	15.674	18.1732	uORF
FBtr0076583_586	41.8966	3.73861	27.9024	15.7199	uORF
FBtr0076624_102	21.4483	9.21584	9.55985	9.17771	uORF
FBtr0076624_118	19.9877	7.84653	53.5819	25.5331	uORF
FBtr0076624_138	25.8301	7.16188	16.8969	2.63554	uORF
FBtr0076624_233	36.0542	5.10792	16.8969	14.9021	uORF
FBtr0076624_433	21.4483	3.05396	12.0055	7.54217	uORF
FBtr0076624_516	33.1331	6.47723	25.4567	8.35994	uORF
FBtr0076688_28	3.92119	3.05396	3.44567	7.54217	uORF
FBtr0076710_82	11.2242	4.42327	5.89134	5.90663	uORF
FBtr0076737_7	2.46059	1	4.66851	1	uORF
FBtr0076783_132	50.6602	5.79257	15.674	5.90663	uORF
FBtr0076783_51	12.6847	2.36931	7.11418	12.4488	uORF
FBtr0076783_58	8.30297	1	4.66851	2.63554	uORF
FBtr0076793_31	110.545	12.6391	54.8048	18.991	uORF
FBtr0076795_176	34.5937	38.6559	24.2339	46.7952	uORF
FBtr0076848_225	57.9631	1.68465	52.3591	1	uORF
FBtr0076848_237	66.7267	6.47723	59.6961	35.3464	uORF
FBtr0076851_77	5.38178	3.73861	3.44567	4.27109	uORF
FBtr0076867_498	25.8301	5.10792	8.33701	45.9774	uORF
FBtr0076867_81	17.0665	5.10792	15.674	25.5331	uORF
FBtr0076878_1	2.46059	1	2.22284	1	uORF
FBtr0076878_30	8.30297	3.05396	4.66851	5.90663	uORF
FBtr0076878_45	8.30297	3.05396	4.66851	5.08886	uORF
FBtr0076878_8	6.84237	3.05396	4.66851	3.45331	uORF
FBtr0076884_29	30.2119	1	4.66851	1.81777	uORF
FBtr0076890_124	18.5271	11.9545	34.0166	20.6265	uORF
FBtr0076890_545	11.2242	4.42327	10.7827	4.27109	uORF
FBtr0076890_83	15.6059	24.9629	20.5654	36.1642	uORF
FBtr0076890_88	27.2907	36.602	37.6851	55.7907	uORF
FBtr0076890_99	15.6059	13.3238	20.5654	24.7154	uORF
FBtr0076934_135	15.6059	7.16188	13.2284	71.3283	uORF
FBtr0076934_228	43.3572	1	31.5709	1.81777	uORF
FBtr0076945_28	21.4483	9.90049	24.2339	27.1687	uORF
FBtr0076949_28	5.38178	13.3238	8.33701	31.2575	uORF
FBtr0076950_138	37.5148	94.7975	31.5709	114.67	uORF
FBtr0076950_153	36.0542	88.6356	30.3481	106.493	uORF
FBtr0076950_251	12.6847	23.5936	14.4512	42.7063	uORF
FBtr0076950_341	6.84237	1.68465	8.33701	1	uORF
FBtr0076950_358	8.30297	2.36931	15.674	1	uORF
FBtr0076950_414	12.6847	1	15.674	5.08886	uORF
FBtr0076950_426	12.6847	1	15.674	5.08886	uORF
FBtr0076950_524	8.30297	4.42327	4.66851	4.27109	uORF
FBtr0076957_4	11.2242	1	4.66851	1	uORF
FBtr0076958_559	11.2242	4.42327	5.89134	5.90663	uORF
FBtr0076958_587	15.6059	12.6391	5.89134	60.6973	uORF
FBtr0076982_167	3.92119	5.79257	3.44567	15.7199	uORF
FBtr0076982_356	2.46059	1.68465	5.89134	1.81777	uORF
FBtr0076982_441	3.92119	6.47723	9.55985	10.8133	uORF
FBtr0076982_45	5.38178	1	4.66851	1.81777	uORF
FBtr0077010_225	62.3449	36.602	16.8969	22.2621	uORF
FBtr0077012_187	19.9877	13.3238	37.6851	79.5061	uORF
FBtr0077012_445	9.76356	1.68465	16.8969	16.5377	uORF
FBtr0077014_37	6.84237	1.68465	3.44567	5.90663	uORF
FBtr0077095_83	38.9754	11.9545	25.4567	23.8976	uORF
FBtr0077100_125	19.9877	5.10792	4.66851	3.45331	uORF
FBtr0077100_210	11.2242	7.84653	5.89134	17.3554	uORF
FBtr0077100_271	36.0542	7.84653	31.5709	10.8133	uORF
FBtr0077100_498	19.9877	1	14.4512	1.81777	uORF
FBtr0077116_103	12.6847	5.79257	4.66851	14.0843	uORF
FBtr0077116_58	8.30297	5.79257	5.89134	10.8133	uORF
FBtr0077123_28	24.3695	3.05396	156.3	10.8133	uORF
FBtr0077157_34	9.76356	7.16188	13.2284	24.7154	uORF
FBtr0077159_239	8.30297	6.47723	12.0055	4.27109	uORF
FBtr0077159_431	212.786	68.7807	152.632	75.4172	uORF
FBtr0077190_107	34.5937	11.9545	20.5654	23.0798	uORF
FBtr0077250_207	11.2242	5.79257	13.2284	8.35994	uORF
FBtr0077250_269	9.76356	7.84653	3.44567	1.81777	uORF
FBtr0077268_16	6.84237	4.42327	9.55985	18.1732	uORF
FBtr0077303_157	5.38178	1.68465	4.66851	1.81777	uORF
FBtr0077303_248	37.5148	3.73861	13.2284	1.81777	uORF
FBtr0077303_320	19.9877	2.36931	9.55985	1	uORF
FBtr0077303_327	18.5271	1.68465	7.11418	1	uORF
FBtr0077303_398	18.5271	1	10.7827	1	uORF
FBtr0077319_144	37.5148	22.9089	32.7937	57.4262	uORF
FBtr0077319_201	15.6059	12.6391	15.674	9.99548	uORF
FBtr0077319_206	19.9877	1	25.4567	3.45331	uORF
FBtr0077319_549	14.1453	3.05396	18.1197	7.54217	uORF
FBtr0077319_600	37.5148	27.7015	29.1252	15.7199	uORF
FBtr0077319_603	36.0542	26.3322	29.1252	15.7199	uORF
FBtr0077319_681	27.2907	5.10792	14.4512	5.08886	uORF
FBtr0077319_850	18.5271	2.36931	20.5654	7.54217	uORF
FBtr0077342_1021	14.1453	11.2698	14.4512	23.0798	uORF
FBtr0077342_1046	9.76356	9.90049	13.2284	7.54217	uORF
FBtr0077342_1245	8.30297	3.05396	9.55985	25.5331	uORF
FBtr0077342_144	5.38178	2.36931	2.22284	3.45331	uORF
FBtr0077342_1515	12.6847	11.2698	19.3425	9.99548	uORF
FBtr0077342_211	3.92119	2.36931	2.22284	2.63554	uORF
FBtr0077342_500	5.38178	1	2.22284	1.81777	uORF
FBtr0077342_614	2.46059	1.68465	2.22284	7.54217	uORF
FBtr0077342_736	3.92119	1	2.22284	1	uORF
FBtr0077342_792	2.46059	1	4.66851	5.08886	uORF
FBtr0077342_944	12.6847	9.90049	5.89134	19.8087	uORF
FBtr0077342_954	11.2242	5.10792	4.66851	13.2666	uORF
FBtr0077344_83	24.3695	9.90049	13.2284	5.08886	uORF
FBtr0077360_31	6.84237	3.05396	2.22284	7.54217	uORF
FBtr0077365_14	36.0542	3.05396	15.674	4.27109	uORF
FBtr0077365_149	33.1331	9.21584	9.55985	2.63554	uORF
FBtr0077384_211	104.702	4.42327	97.604	20.6265	uORF
FBtr0077384_618	40.436	26.3322	49.9134	86.866	uORF
FBtr0077391_377	296.04	230.359	56.0276	117.941	uORF
FBtr0077394_6	21.4483	35.9173	16.8969	47.613	uORF
FBtr0077396_13	14.1453	9.90049	3.44567	6.7244	uORF
FBtr0077396_146	14.1453	1.68465	13.2284	5.08886	uORF
FBtr0077418_214	41.8966	8.53119	15.674	23.8976	uORF
FBtr0077418_250	33.1331	2.36931	18.1197	5.08886	uORF
FBtr0077425_272	418.73	189.28	183.203	153.105	uORF
FBtr0077425_86	274.131	93.4282	90.267	87.6838	uORF
FBtr0077426_196	40.436	5.79257	21.7882	24.7154	uORF
FBtr0077426_378	30.2119	4.42327	13.2284	8.35994	uORF
FBtr0077426_40	85.7144	24.2782	48.6906	10.8133	uORF
FBtr0077426_444	31.6725	46.1871	16.8969	39.4353	uORF
FBtr0077426_470	19.9877	12.6391	12.0055	14.0843	uORF
FBtr0077426_573	21.4483	4.42327	15.674	6.7244	uORF
FBtr0077426_579	21.4483	4.42327	14.4512	5.08886	uORF
FBtr0077426_673	44.8178	36.602	32.7937	32.0753	uORF
FBtr0077426_679	44.8178	27.7015	31.5709	16.5377	uORF
FBtr0077426_686	62.3449	20.8549	34.0166	13.2666	uORF
FBtr0077431_331	177.732	74.2579	152.632	345.282	uORF
FBtr0077439_60	2.46059	1	2.22284	5.08886	uORF
FBtr0077446_180	11.2242	1	12.0055	5.90663	uORF
FBtr0077446_210	11.2242	1	9.55985	4.27109	uORF
FBtr0077446_238	11.2242	1	9.55985	2.63554	uORF
FBtr0077446_242	9.76356	1	9.55985	1.81777	uORF
FBtr0077446_246	11.2242	1	7.11418	3.45331	uORF
FBtr0077446_408	12.6847	1.68465	10.7827	4.27109	uORF
FBtr0077446_465	34.5937	35.2327	24.2339	10.8133	uORF
FBtr0077446_474	30.2119	34.548	24.2339	10.8133	uORF
FBtr0077446_534	8.30297	17.4317	12.0055	5.08886	uORF
FBtr0077446_542	14.1453	1.68465	20.5654	1	uORF
FBtr0077446_58	33.1331	8.53119	18.1197	7.54217	uORF
FBtr0077465_276	19.9877	44.8178	20.5654	172.732	uORF
FBtr0077477_138	41.8966	5.10792	18.1197	9.17771	uORF
FBtr0077479_49	8.30297	1.68465	3.44567	1.81777	uORF
FBtr0077498_1036	28.7513	1	26.6795	1	uORF
FBtr0077498_189	8.30297	1.68465	14.4512	1.81777	uORF
FBtr0077498_219	8.30297	9.90049	13.2284	4.27109	uORF
FBtr0077498_585	3.92119	1	5.89134	5.90663	uORF
FBtr0077498_748	34.5937	28.3861	36.4622	36.1642	uORF
FBtr0077498_790	19.9877	17.4317	21.7882	17.3554	uORF
FBtr0077498_849	21.4483	5.10792	23.011	16.5377	uORF
FBtr0077567_259	31.6725	10.5851	25.4567	49.2485	uORF
FBtr0077567_275	30.2119	8.53119	25.4567	56.6085	uORF
FBtr0077576_216	36.0542	10.5851	37.6851	5.08886	uORF
FBtr0077592_14	18.5271	1.68465	8.33701	1	uORF
FBtr0077625_247	25.8301	3.05396	18.1197	3.45331	uORF
FBtr0077625_314	15.6059	11.2698	13.2284	26.3509	uORF
FBtr0077625_319	24.3695	7.84653	14.4512	11.631	uORF
FBtr0077625_411	22.9089	9.90049	13.2284	16.5377	uORF
FBtr0077625_493	11.2242	4.42327	3.44567	3.45331	uORF
FBtr0077629_255	40.436	42.0792	53.5819	40.253	uORF
FBtr0077629_259	57.9631	42.0792	71.9245	36.1642	uORF
FBtr0077662_268	2.46059	7.84653	4.66851	12.4488	uORF
FBtr0077662_9	2.46059	3.05396	3.44567	1.81777	uORF
FBtr0077667_123	12.6847	1	14.4512	1.81777	uORF
FBtr0077667_81	12.6847	1	14.4512	1.81777	uORF
FBtr0077671_80	8.30297	5.79257	18.1197	11.631	uORF
FBtr0077671_92	8.30297	9.90049	19.3425	32.8931	uORF
FBtr0077685_256	187.956	509.013	156.3	714.914	uORF
FBtr0077720_100	6.84237	8.53119	8.33701	25.5331	uORF
FBtr0077720_191	2.46059	4.42327	3.44567	12.4488	uORF
FBtr0077720_296	3.92119	3.73861	3.44567	14.0843	uORF
FBtr0077720_325	8.30297	7.84653	2.22284	4.27109	uORF
FBtr0077720_375	14.1453	31.8094	9.55985	101.586	uORF
FBtr0077720_495	36.0542	46.1871	34.0166	86.866	uORF
FBtr0077720_529	21.4483	5.10792	15.674	9.17771	uORF
FBtr0077720_537	21.4483	19.4856	18.1197	25.5331	uORF
FBtr0077720_70	5.38178	1	7.11418	39.4353	uORF
FBtr0077726_19	164.586	110.545	80.4843	39.4353	uORF
FBtr0077726_84	114.926	2.36931	100.05	2.63554	uORF
FBtr0077731_170	43.3572	18.801	45.0221	52.5196	uORF
FBtr0077731_324	114.926	42.0792	74.3701	52.5196	uORF
FBtr0077731_352	82.7932	39.3406	57.2504	58.244	uORF
FBtr0077731_57	9.76356	22.2242	14.4512	41.8886	uORF
FBtr0077744_91	44.8178	4.42327	27.9024	14.9021	uORF
FBtr0077762_385	19.9877	8.53119	4.66851	3.45331	uORF
FBtr0077762_403	15.6059	3.73861	3.44567	1	uORF
FBtr0077769_257	59.4237	15.3777	59.6961	18.1732	uORF
FBtr0077769_282	53.5814	4.42327	46.2449	4.27109	uORF
FBtr0077769_293	57.9631	16.0624	57.2504	16.5377	uORF
FBtr0077769_299	55.042	14.0084	52.3591	16.5377	uORF
FBtr0077769_329	30.2119	4.42327	30.3481	5.08886	uORF
FBtr0077769_483	74.0297	10.5851	74.3701	22.2621	uORF
FBtr0077782_66	5.38178	3.05396	2.22284	3.45331	uORF
FBtr0077793_196	244.919	23.5936	175.866	58.244	uORF
FBtr0077813_81	30.2119	61.2495	10.7827	45.9774	uORF
FBtr0077815_30	6.84237	2.36931	5.89134	3.45331	uORF
FBtr0077815_46	9.76356	3.73861	14.4512	2.63554	uORF
FBtr0077822_212	53.5814	33.8634	40.1307	97.497	uORF
FBtr0077831_49	15.6059	11.2698	8.33701	18.1732	uORF
FBtr0077840_106	168.968	27.7015	118.392	46.7952	uORF
FBtr0077840_117	47.739	13.3238	32.7937	23.0798	uORF
FBtr0077840_25	57.9631	16.747	23.011	24.7154	uORF
FBtr0077844_141	6.84237	1	5.89134	1	uORF
FBtr0077844_158	8.30297	1	12.0055	2.63554	uORF
FBtr0077850_335	31.6725	13.3238	32.7937	38.6175	uORF
FBtr0077850_647	36.0542	36.602	25.4567	40.253	uORF
FBtr0077885_94	30.2119	5.79257	3.44567	1.81777	uORF
FBtr0077893_239	30.2119	11.2698	14.4512	18.991	uORF
FBtr0077893_256	27.2907	5.10792	13.2284	16.5377	uORF
FBtr0077893_307	17.0665	1.68465	9.55985	2.63554	uORF
FBtr0077893_411	22.9089	6.47723	7.11418	14.0843	uORF
FBtr0077893_530	14.1453	5.79257	8.33701	16.5377	uORF
FBtr0077949_524	43.3572	46.8718	69.4788	59.0618	uORF
FBtr0077949_557	37.5148	46.8718	59.6961	58.244	uORF
FBtr0077949_576	19.9877	11.2698	32.7937	9.99548	uORF
FBtr0077949_88	49.1996	5.10792	37.6851	12.4488	uORF
FBtr0077953_100	38.9754	5.10792	14.4512	5.08886	uORF
FBtr0077953_151	33.1331	9.21584	18.1197	6.7244	uORF
FBtr0077956_85	49.1996	32.494	27.9024	27.9865	uORF
FBtr0077966_30	28.7513	3.05396	14.4512	2.63554	uORF
FBtr0077972_247	33.1331	18.801	15.674	9.99548	uORF
FBtr0077972_251	38.9754	14.0084	16.8969	7.54217	uORF
FBtr0077972_307	12.6847	3.73861	7.11418	4.27109	uORF
FBtr0077980_205	12.6847	2.36931	7.11418	2.63554	uORF
FBtr0077989_81	9.76356	8.53119	13.2284	15.7199	uORF
FBtr0077989_90	9.76356	7.84653	13.2284	13.2666	uORF
FBtr0077993_163	9.76356	1.68465	19.3425	7.54217	uORF
FBtr0077993_983	15.6059	8.53119	7.11418	11.631	uORF
FBtr0078014_213	34.5937	5.79257	25.4567	6.7244	uORF
FBtr0078014_28	8.30297	1	13.2284	3.45331	uORF
FBtr0078014_382	18.5271	5.79257	23.011	2.63554	uORF
FBtr0078033_121	2.46059	1	2.22284	1.81777	uORF
FBtr0078050_438	30.2119	61.2495	26.6795	50.8841	uORF
FBtr0078050_505	43.3572	44.1332	51.1363	19.8087	uORF
FBtr0078050_529	33.1331	31.1247	41.3536	11.631	uORF
FBtr0078050_582	12.6847	5.79257	21.7882	1	uORF
FBtr0078060_121	18.5271	16.747	7.11418	22.2621	uORF
FBtr0078066_9	11.2242	12.6391	9.55985	16.5377	uORF
FBtr0078068_32	2.46059	1.68465	3.44567	2.63554	uORF
FBtr0078087_359	25.8301	59.8802	10.7827	112.217	uORF
FBtr0078087_371	71.1085	25.6475	49.9134	117.941	uORF
FBtr0078087_449	38.9754	27.7015	47.4678	26.3509	uORF
FBtr0078094_142	55.042	10.5851	9.55985	7.54217	uORF
FBtr0078094_20	41.8966	94.7975	5.89134	15.7199	uORF
FBtr0078094_45	52.1208	87.2663	8.33701	27.9865	uORF
FBtr0078100_279	17.0665	14.0084	16.8969	14.9021	uORF
FBtr0078100_390	8.30297	4.42327	7.11418	1	uORF
FBtr0078100_429	8.30297	8.53119	10.7827	15.7199	uORF
FBtr0078100_467	2.46059	7.16188	3.44567	13.2666	uORF
FBtr0078100_94	9.76356	3.05396	4.66851	5.08886	uORF
FBtr0078117_24	62.3449	13.3238	48.6906	11.631	uORF
FBtr0078122_758	11.2242	24.2782	2.22284	38.6175	uORF
FBtr0078122_792	5.38178	7.16188	2.22284	25.5331	uORF
FBtr0078122_801	2.46059	6.47723	2.22284	25.5331	uORF
FBtr0078122_925	3.92119	6.47723	8.33701	5.90663	uORF
FBtr0078122_932	2.46059	4.42327	7.11418	5.08886	uORF
FBtr0078122_957	9.76356	14.0084	8.33701	11.631	uORF
FBtr0078122_960	9.76356	14.0084	7.11418	11.631	uORF
FBtr0078122_989	9.76356	10.5851	4.66851	3.45331	uORF
FBtr0078153_210	5.38178	3.05396	8.33701	2.63554	uORF
FBtr0078179_144	2.46059	1	7.11418	1	uORF
FBtr0078179_72	6.84237	1	9.55985	1	uORF
FBtr0078192_180	22.9089	5.79257	7.11418	5.90663	uORF
FBtr0078195_116	12.6847	1	15.674	1	uORF
FBtr0078195_98	19.9877	12.6391	26.6795	5.08886	uORF
FBtr0078214_224	71.1085	37.2866	79.2615	49.2485	uORF
FBtr0078214_249	66.7267	37.9713	80.4843	44.3419	uORF
FBtr0078214_43	38.9754	15.3777	24.2339	13.2666	uORF
FBtr0078214_77	38.9754	3.05396	26.6795	5.08886	uORF
FBtr0078233_108	14.1453	1	7.11418	1	uORF
FBtr0078247_123	74.0297	5.10792	36.4622	12.4488	uORF
FBtr0078256_13	5.38178	3.73861	3.44567	4.27109	uORF
FBtr0078267_186	34.5937	13.3238	18.1197	15.7199	uORF
FBtr0078271_106	28.7513	28.3861	9.55985	16.5377	uORF
FBtr0078271_55	18.5271	4.42327	15.674	14.9021	uORF
FBtr0078271_93	37.5148	35.2327	12.0055	22.2621	uORF
FBtr0078271_99	34.5937	33.1787	10.7827	18.991	uORF
FBtr0078277_118	18.5271	21.5396	21.7882	17.3554	uORF
FBtr0078289_318	6.84237	4.42327	5.89134	5.90663	uORF
FBtr0078305_96	12.6847	2.36931	9.55985	3.45331	uORF
FBtr0078311_127	25.8301	8.53119	23.011	21.4443	uORF
FBtr0078323_146	22.9089	3.73861	14.4512	1.81777	uORF
FBtr0078323_16	31.6725	2.36931	5.89134	1	uORF
FBtr0078323_4	31.6725	2.36931	5.89134	1	uORF
FBtr0078323_43	38.9754	14.0084	15.674	9.99548	uORF
FBtr0078323_7	31.6725	2.36931	5.89134	1	uORF
FBtr0078351_130	87.175	13.3238	52.3591	60.6973	uORF
FBtr0078357_447	22.9089	7.84653	8.33701	14.9021	uORF
FBtr0078357_460	8.30297	3.05396	3.44567	6.7244	uORF
FBtr0078357_484	11.2242	1.68465	5.89134	4.27109	uORF
FBtr0078357_508	6.84237	1	3.44567	1	uORF
FBtr0078357_56	2.46059	5.10792	3.44567	9.99548	uORF
FBtr0078357_76	3.92119	2.36931	3.44567	8.35994	uORF
FBtr0078359_402	82.7932	10.5851	82.93	6.7244	uORF
FBtr0078382_13	65.2661	14.6931	47.4678	7.54217	uORF
FBtr0078383_11	18.5271	10.5851	9.55985	14.0843	uORF
FBtr0078383_45	12.6847	3.05396	9.55985	42.7063	uORF
FBtr0078389_143	11.2242	38.6559	7.11418	50.8841	uORF
FBtr0078389_163	11.2242	40.0252	7.11418	54.1551	uORF
FBtr0078404_35	6.84237	9.21584	7.11418	45.9774	uORF
FBtr0078413_100	8.30297	1	249.236	231.612	uORF
FBtr0078413_128	392.439	28.3861	248.013	231.612	uORF
FBtr0078413_169	2.46059	1	2.22284	1	uORF
FBtr0078413_224	389.518	28.3861	245.567	231.612	uORF
FBtr0078413_264	329.634	14.6931	144.072	13.2666	uORF
FBtr0078413_31	8.30297	7.16188	4.66851	2.63554	uORF
FBtr0078413_311	364.688	24.2782	239.453	229.158	uORF
FBtr0078413_40	8.30297	5.10792	2.22284	1	uORF
FBtr0078413_43	6.84237	4.42327	2.22284	1	uORF
FBtr0078413_51	12.6847	1.68465	4.66851	1	uORF
FBtr0078462_116	60.8843	21.5396	32.7937	30.4398	uORF
FBtr0078462_168	41.8966	17.4317	31.5709	21.4443	uORF
FBtr0078462_30	5.38178	5.10792	3.44567	17.3554	uORF
FBtr0078464_103	2.46059	7.16188	14.4512	5.08886	uORF
FBtr0078464_26	3.92119	1.68465	4.66851	3.45331	uORF
FBtr0078464_29	3.92119	1.68465	4.66851	2.63554	uORF
FBtr0078472_167	5.38178	7.16188	2.22284	5.08886	uORF
FBtr0078472_210	2.46059	3.05396	3.44567	1.81777	uORF
FBtr0078472_68	3.92119	22.2242	7.11418	18.1732	uORF
FBtr0078486_117	19.9877	5.10792	32.7937	5.08886	uORF
FBtr0078486_26	30.2119	36.602	63.3646	64.7862	uORF
FBtr0078486_43	17.0665	2.36931	27.9024	2.63554	uORF
FBtr0078486_48	38.9754	31.1247	75.593	50.0663	uORF
FBtr0078510_34	14.1453	5.79257	4.66851	15.7199	uORF
FBtr0078512_115	22.9089	6.47723	18.1197	5.08886	uORF
FBtr0078512_147	22.9089	9.21584	21.7882	1.81777	uORF
FBtr0078512_79	12.6847	20.8549	29.1252	24.7154	uORF
FBtr0078555_105	9.76356	3.05396	7.11418	9.17771	uORF
FBtr0078555_168	5.38178	1	4.66851	1.81777	uORF
FBtr0078555_210	2.46059	5.10792	2.22284	7.54217	uORF
FBtr0078571_143	246.38	46.1871	234.562	59.0618	uORF
FBtr0078642_198	38.9754	60.5648	18.1197	79.5061	uORF
FBtr0078652_39	11.2242	2.36931	12.0055	4.27109	uORF
FBtr0078677_94	25.8301	27.7015	24.2339	27.1687	uORF
FBtr0078681_39	15.6059	16.747	10.7827	20.6265	uORF
FBtr0078681_79	52.1208	13.3238	47.4678	19.8087	uORF
FBtr0078687_143	2.46059	1.68465	12.0055	9.17771	uORF
FBtr0078687_196	5.38178	1.68465	2.22284	4.27109	uORF
FBtr0078687_205	5.38178	1.68465	2.22284	3.45331	uORF
FBtr0078687_397	3.92119	1.68465	2.22284	1	uORF
FBtr0078687_702	14.1453	4.42327	18.1197	9.17771	uORF
FBtr0078689_112	14.1453	9.21584	18.1197	5.90663	uORF
FBtr0078716_139	15.6059	3.05396	18.1197	8.35994	uORF
FBtr0078716_330	11.2242	10.5851	8.33701	12.4488	uORF
FBtr0078716_423	5.38178	5.10792	13.2284	12.4488	uORF
FBtr0078716_615	5.38178	8.53119	5.89134	8.35994	uORF
FBtr0078716_685	6.84237	1	8.33701	1.81777	uORF
FBtr0078716_77	8.30297	30.4401	8.33701	7.54217	uORF
FBtr0078716_915	38.9754	7.84653	31.5709	14.0843	uORF
FBtr0078732_69	88.6356	45.5025	93.9355	56.6085	uORF
FBtr0078732_79	65.2661	40.0252	82.93	40.253	uORF
FBtr0078736_2	12.6847	4.42327	3.44567	1.81777	uORF
FBtr0078741_232	17.0665	2.36931	14.4512	7.54217	uORF
FBtr0078741_619	56.5026	4.42327	34.0166	18.991	uORF
FBtr0078741_643	28.7513	3.73861	20.5654	9.99548	uORF
FBtr0078741_926	130.993	32.494	93.9355	53.3374	uORF
FBtr0078741_933	52.1208	7.16188	30.3481	9.17771	uORF
FBtr0078741_960	87.175	9.21584	59.6961	14.0843	uORF
FBtr0078752_265	43.3572	33.8634	37.6851	43.5241	uORF
FBtr0078752_392	19.9877	27.7015	18.1197	31.2575	uORF
FBtr0078752_440	36.0542	6.47723	25.4567	11.631	uORF
FBtr0078752_480	8.30297	1	5.89134	1	uORF
FBtr0078761_124	33.1331	22.2242	19.3425	18.991	uORF
FBtr0078761_189	22.9089	13.3238	14.4512	19.8087	uORF
FBtr0078761_35	18.5271	2.36931	4.66851	5.08886	uORF
FBtr0078763_154	15.6059	2.36931	5.89134	5.90663	uORF
FBtr0078763_161	17.0665	2.36931	5.89134	8.35994	uORF
FBtr0078764_161	36.0542	1.68465	27.9024	3.45331	uORF
FBtr0078764_296	24.3695	4.42327	23.011	7.54217	uORF
FBtr0078764_302	24.3695	3.73861	21.7882	4.27109	uORF
FBtr0078770_150	27.2907	15.3777	35.2394	35.3464	uORF
FBtr0078770_158	31.6725	23.5936	53.5819	67.2395	uORF
FBtr0078770_311	5.38178	1	10.7827	1	uORF
FBtr0078777_54	15.6059	9.90049	13.2284	18.1732	uORF
FBtr0078803_272	22.9089	9.90049	10.7827	17.3554	uORF
FBtr0078803_358	91.5568	9.21584	60.9189	22.2621	uORF
FBtr0078828_39	9.76356	3.73861	5.89134	13.2666	uORF
FBtr0078828_43	6.84237	2.36931	4.66851	4.27109	uORF
FBtr0078844_388	119.308	12.6391	75.593	9.99548	uORF
FBtr0078844_489	75.4903	12.6391	65.8103	14.0843	uORF
FBtr0078844_647	24.3695	1	15.674	1	uORF
FBtr0078844_780	15.6059	6.47723	23.011	9.99548	uORF
FBtr0078844_951	9.76356	7.84653	8.33701	11.631	uORF
FBtr0078856_301	15.6059	5.10792	16.8969	6.7244	uORF
FBtr0078861_74	12.6847	10.5851	7.11418	13.2666	uORF
FBtr0078894_33	60.8843	11.9545	47.4678	37.7997	uORF
FBtr0078926_171	12.6847	6.47723	24.2339	1.81777	uORF
FBtr0078958_42	9.76356	28.3861	8.33701	63.9684	uORF
FBtr0078959_140	81.3326	4.42327	32.7937	3.45331	uORF
FBtr0078961_227	28.7513	9.21584	21.7882	9.17771	uORF
FBtr0078961_293	101.781	41.3945	71.9245	34.5286	uORF
FBtr0078961_324	297.5	94.7975	218.665	103.221	uORF
FBtr0078961_340	113.466	45.5025	67.0331	19.8087	uORF
FBtr0078985_42	18.5271	8.53119	9.55985	9.99548	uORF
FBtr0079010_65	3.92119	1	2.22284	1	uORF
FBtr0079026_251	22.9089	22.9089	24.2339	20.6265	uORF
FBtr0079026_356	55.042	33.8634	38.9079	27.1687	uORF
FBtr0079026_429	14.1453	11.9545	16.8969	14.9021	uORF
FBtr0079026_614	15.6059	19.4856	9.55985	33.7109	uORF
FBtr0079026_83	14.1453	9.90049	9.55985	50.0663	uORF
FBtr0079026_97	15.6059	3.73861	9.55985	5.90663	uORF
FBtr0079036_40	76.9509	14.0084	47.4678	14.9021	uORF
FBtr0079053_30	94.478	6.47723	52.3591	11.631	uORF
FBtr0079071_343	11.2242	11.9545	16.8969	24.7154	uORF
FBtr0079077_121	6.84237	5.10792	5.89134	11.631	uORF
FBtr0079078_296	43.3572	1.68465	15.674	1	uORF
FBtr0079078_302	34.5937	1.68465	15.674	1	uORF
FBtr0079078_314	193.798	86.5816	70.7016	96.6792	uORF
FBtr0079078_320	189.417	86.5816	64.5875	94.2259	uORF
FBtr0079078_335	182.114	85.897	59.6961	92.5904	uORF
FBtr0079078_427	47.739	18.801	20.5654	30.4398	uORF
FBtr0079078_468	33.1331	22.2242	10.7827	29.622	uORF
FBtr0079114_11	17.0665	2.36931	24.2339	3.45331	uORF
FBtr0079114_219	11.2242	13.3238	7.11418	14.0843	uORF
FBtr0079128_32	6.84237	7.84653	2.22284	1	uORF
FBtr0079223_9	21.4483	3.05396	15.674	2.63554	uORF
FBtr0079231_141	22.9089	22.9089	36.4622	118.759	uORF
FBtr0079231_196	9.76356	13.3238	21.7882	101.586	uORF
FBtr0079231_48	12.6847	3.05396	8.33701	5.08886	uORF
FBtr0079249_111	22.9089	20.8549	19.3425	23.8976	uORF
FBtr0079249_250	9.76356	13.3238	8.33701	14.9021	uORF
FBtr0079249_297	17.0665	1.68465	9.55985	3.45331	uORF
FBtr0079249_408	14.1453	10.5851	15.674	11.631	uORF
FBtr0079253_123	17.0665	44.8178	18.1197	44.3419	uORF
FBtr0079253_185	12.6847	2.36931	15.674	5.90663	uORF
FBtr0079262_102	34.5937	42.0792	14.4512	54.1551	uORF
FBtr0079267_31	17.0665	3.05396	3.44567	4.27109	uORF
FBtr0079267_81	37.5148	22.2242	29.1252	45.9774	uORF
FBtr0079268_115	63.8055	20.8549	31.5709	2.63554	uORF
FBtr0079287_119	43.3572	29.7554	46.2449	49.2485	uORF
FBtr0079287_150	49.1996	16.0624	36.4622	14.0843	uORF
FBtr0079291_204	38.9754	20.1703	51.1363	21.4443	uORF
FBtr0079291_221	40.436	8.53119	60.9189	16.5377	uORF
FBtr0079291_228	60.8843	45.5025	64.5875	50.0663	uORF
FBtr0079295_139	11.2242	1	8.33701	1	uORF
FBtr0079310_195	24.3695	7.84653	14.4512	28.8042	uORF
FBtr0079312_121	9.76356	3.73861	19.3425	3.45331	uORF
FBtr0079312_471	14.1453	4.42327	14.4512	5.90663	uORF
FBtr0079312_479	18.5271	6.47723	24.2339	16.5377	uORF
FBtr0079322_135	3.92119	1.68465	8.33701	10.8133	uORF
FBtr0079322_35	2.46059	4.42327	3.44567	3.45331	uORF
FBtr0079322_63	3.92119	5.10792	10.7827	12.4488	uORF
FBtr0079336_10	123.69	84.5277	92.7127	53.3374	uORF
FBtr0079336_26	136.835	79.7351	35.2394	25.5331	uORF
FBtr0079336_380	2.46059	14.0084	13.2284	6.7244	uORF
FBtr0079336_441	157.284	143.408	82.93	80.3238	uORF
FBtr0079336_493	93.0174	42.7638	58.4733	64.7862	uORF
FBtr0079336_498	117.847	58.5109	68.256	70.5106	uORF
FBtr0079336_508	78.4115	37.2866	54.8048	58.244	uORF
FBtr0079355_137	18.5271	4.42327	23.011	6.7244	uORF
FBtr0079384_268	135.375	5.10792	75.593	5.08886	uORF
FBtr0079401_144	94.478	55.7723	95.1583	85.2305	uORF
FBtr0079401_370	114.926	22.2242	103.718	45.9774	uORF
FBtr0079401_431	94.478	24.2782	113.501	56.6085	uORF
FBtr0079401_437	90.0962	24.2782	109.832	55.7907	uORF
FBtr0079401_441	94.478	26.3322	115.947	59.0618	uORF
FBtr0079401_462	85.7144	23.5936	109.832	41.0708	uORF
FBtr0079401_486	63.8055	11.9545	81.7072	23.8976	uORF
FBtr0079401_547	41.8966	9.90049	51.1363	21.4443	uORF
FBtr0079401_685	113.466	51.6643	58.4733	43.5241	uORF
FBtr0079401_887	21.4483	2.36931	10.7827	5.90663	uORF
FBtr0079436_71	2833.09	297.455	1359.57	201.354	uORF
FBtr0079444_98	62.3449	2.36931	38.9079	8.35994	uORF
FBtr0079477_260	5.38178	1.68465	2.22284	1	uORF
FBtr0079477_265	11.2242	7.84653	10.7827	17.3554	uORF
FBtr0079490_304	3.92119	3.05396	4.66851	9.99548	uORF
FBtr0079490_313	2.46059	1	4.66851	1.81777	uORF
FBtr0079492_133	3.92119	2.36931	10.7827	3.45331	uORF
FBtr0079492_248	34.5937	30.4401	7.11418	4.27109	uORF
FBtr0079492_285	18.5271	25.6475	5.89134	14.0843	uORF
FBtr0079492_384	60.8843	14.6931	63.3646	14.0843	uORF
FBtr0079493_156	12.6847	12.6391	9.55985	63.1506	uORF
FBtr0079493_27	5.38178	3.05396	20.5654	2.63554	uORF
FBtr0079523_197	27.2907	14.0084	48.6906	16.5377	uORF
FBtr0079523_254	6.84237	2.36931	21.7882	1.81777	uORF
FBtr0079523_267	30.2119	9.21584	46.2449	13.2666	uORF
FBtr0079523_318	27.2907	6.47723	36.4622	5.90663	uORF
FBtr0079523_529	14.1453	1	5.89134	2.63554	uORF
FBtr0079533_133	3.92119	1	5.89134	1.81777	uORF
FBtr0079533_15	6.84237	4.42327	5.89134	10.8133	uORF
FBtr0079533_61	3.92119	4.42327	4.66851	8.35994	uORF
FBtr0079543_123	5.38178	17.4317	5.89134	21.4443	uORF
FBtr0079574_169	24.3695	8.53119	9.55985	1	uORF
FBtr0079574_364	204.022	181.748	113.501	238.154	uORF
FBtr0079574_370	193.798	118.076	109.832	121.212	uORF
FBtr0079576_267	12.6847	1	5.89134	1.81777	uORF
FBtr0079576_288	18.5271	18.801	5.89134	23.8976	uORF
FBtr0079576_297	18.5271	11.9545	5.89134	19.8087	uORF
FBtr0079576_304	18.5271	3.05396	4.66851	9.99548	uORF
FBtr0079576_336	25.8301	6.47723	21.7882	36.1642	uORF
FBtr0079576_55	9.76356	8.53119	13.2284	5.90663	uORF
FBtr0079576_565	36.0542	29.0708	24.2339	29.622	uORF
FBtr0079600_112	15.6059	3.05396	15.674	5.08886	uORF
FBtr0079608_164	5.38178	10.5851	4.66851	5.08886	uORF
FBtr0079613_37	15.6059	5.10792	8.33701	9.99548	uORF
FBtr0079616_528	3.92119	14.6931	4.66851	14.0843	uORF
FBtr0079637_164	3.92119	5.10792	7.11418	16.5377	uORF
FBtr0079637_173	3.92119	4.42327	4.66851	9.17771	uORF
FBtr0079637_218	6.84237	10.5851	2.22284	21.4443	uORF
FBtr0079637_33	24.3695	3.73861	18.1197	5.08886	uORF
FBtr0079648_171	46.2784	20.8549	23.011	18.1732	uORF
FBtr0079648_223	19.9877	11.9545	10.7827	2.63554	uORF
FBtr0079648_66	37.5148	4.42327	23.011	15.7199	uORF
FBtr0079711_80	11.2242	1.68465	7.11418	2.63554	uORF
FBtr0079822_397	8.30297	3.73861	5.89134	2.63554	uORF
FBtr0079822_455	12.6847	2.36931	4.66851	5.08886	uORF
FBtr0079822_550	6.84237	2.36931	2.22284	6.7244	uORF
FBtr0079822_600	9.76356	4.42327	3.44567	3.45331	uORF
FBtr0079825_275	8.30297	8.53119	3.44567	11.631	uORF
FBtr0079825_297	6.84237	5.79257	3.44567	8.35994	uORF
FBtr0079825_310	8.30297	3.73861	2.22284	4.27109	uORF
FBtr0079825_35	11.2242	4.42327	8.33701	1.81777	uORF
FBtr0079825_374	6.84237	17.4317	13.2284	24.7154	uORF
FBtr0079825_409	8.30297	5.79257	14.4512	5.90663	uORF
FBtr0079825_471	17.0665	23.5936	4.66851	10.8133	uORF
FBtr0079825_502	12.6847	2.36931	10.7827	4.27109	uORF
FBtr0079825_526	12.6847	1	8.33701	1	uORF
FBtr0079839_116	15.6059	7.84653	41.3536	14.9021	uORF
FBtr0079839_173	11.2242	2.36931	41.3536	14.9021	uORF
FBtr0079851_238	44.8178	12.6391	46.2449	35.3464	uORF
FBtr0079851_58	60.8843	1.68465	64.5875	4.27109	uORF
FBtr0079860_144	8.30297	9.21584	8.33701	7.54217	uORF
FBtr0079860_271	40.436	39.3406	25.4567	10.8133	uORF
FBtr0079860_293	15.6059	12.6391	41.3536	36.1642	uORF
FBtr0079860_300	17.0665	14.0084	20.5654	8.35994	uORF
FBtr0079860_347	33.1331	22.2242	36.4622	19.8087	uORF
FBtr0079860_357	85.7144	27.0168	78.0386	52.5196	uORF
FBtr0079860_429	44.8178	3.05396	40.1307	5.90663	uORF
FBtr0079860_642	87.175	20.8549	106.164	8.35994	uORF
FBtr0079860_681	53.5814	17.4317	67.0331	5.08886	uORF
FBtr0079865_166	37.5148	35.2327	30.3481	31.2575	uORF
FBtr0079885_236	44.8178	8.53119	25.4567	7.54217	uORF
FBtr0079885_81	9.76356	4.42327	4.66851	4.27109	uORF
FBtr0079901_30	2.46059	3.73861	7.11418	4.27109	uORF
FBtr0079902_119	87.175	3.73861	53.5819	7.54217	uORF
FBtr0079902_197	90.0962	1.68465	53.5819	4.27109	uORF
FBtr0079902_227	49.1996	1.68465	129.398	14.0843	uORF
FBtr0079902_26	21.4483	1.68465	16.8969	2.63554	uORF
FBtr0079902_467	218.628	1.68465	156.3	7.54217	uORF
FBtr0079902_473	206.944	1.68465	146.517	4.27109	uORF
FBtr0079902_575	93.0174	3.05396	48.6906	9.17771	uORF
FBtr0079902_652	246.38	11.2698	163.637	15.7199	uORF
FBtr0079902_661	234.695	7.16188	152.632	8.35994	uORF
FBtr0079902_985	94.478	7.16188	45.0221	24.7154	uORF
FBtr0079932_29	24.3695	14.0084	14.4512	80.3238	uORF
FBtr0079957_123	24.3695	2.36931	8.33701	5.08886	uORF
FBtr0079957_263	8.30297	1	3.44567	5.90663	uORF
FBtr0079975_96	78.4115	10.5851	27.9024	21.4443	uORF
FBtr0079992_102	17.0665	48.9257	8.33701	84.4127	uORF
FBtr0079992_19	8.30297	29.7554	4.66851	44.3419	uORF
FBtr0079992_38	6.84237	7.84653	4.66851	17.3554	uORF
FBtr0079993_116	6.84237	3.73861	2.22284	5.90663	uORF
FBtr0080030_151	22.9089	51.6643	8.33701	309.3	uORF
FBtr0080030_22	113.466	25.6475	84.1528	49.2485	uORF
FBtr0080035_27	27.2907	1.68465	19.3425	9.17771	uORF
FBtr0080043_150	8.30297	16.0624	20.5654	19.8087	uORF
FBtr0080043_31	5.38178	1	4.66851	1.81777	uORF
FBtr0080063_124	68.1873	74.2579	35.2394	105.675	uORF
FBtr0080063_139	50.6602	56.4569	27.9024	68.875	uORF
FBtr0080063_37	24.3695	1	8.33701	1	uORF
FBtr0080063_86	52.1208	24.2782	30.3481	20.6265	uORF
FBtr0080065_37	24.3695	2.36931	5.89134	7.54217	uORF
FBtr0080074_146	8.30297	28.3861	4.66851	54.9729	uORF
FBtr0080087_127	50.6602	50.295	19.3425	96.6792	uORF
FBtr0080087_219	50.6602	90.6896	38.9079	155.559	uORF
FBtr0080087_228	49.1996	67.4114	36.4622	117.941	uORF
FBtr0080087_52	27.2907	23.5936	19.3425	24.7154	uORF
FBtr0080087_68	19.9877	18.1163	14.4512	17.3554	uORF
FBtr0080088_102	19.9877	17.4317	15.674	25.5331	uORF
FBtr0080088_109	21.4483	14.0084	18.1197	17.3554	uORF
FBtr0080088_53	5.38178	2.36931	3.44567	9.99548	uORF
FBtr0080114_117	25.8301	18.1163	10.7827	28.8042	uORF
FBtr0080117_211	85.7144	18.1163	92.7127	34.5286	uORF
FBtr0080181_48	12.6847	1.68465	3.44567	15.7199	uORF
FBtr0080181_86	56.5026	11.9545	40.1307	4.27109	uORF
FBtr0080187_103	30.2119	1	20.5654	1.81777	uORF
FBtr0080189_107	49.1996	7.16188	20.5654	3.45331	uORF
FBtr0080189_158	19.9877	1	9.55985	1	uORF
FBtr0080231_113	11.2242	3.73861	5.89134	14.0843	uORF
FBtr0080231_239	15.6059	1	5.89134	1	uORF
FBtr0080259_111	94.478	33.8634	47.4678	33.7109	uORF
FBtr0080261_1065	33.1331	1.68465	27.9024	4.27109	uORF
FBtr0080261_1111	76.9509	26.3322	48.6906	32.8931	uORF
FBtr0080261_1181	93.0174	54.4029	74.3701	54.9729	uORF
FBtr0080261_1226	50.6602	43.4485	40.1307	45.1597	uORF
FBtr0080261_1252	63.8055	16.0624	32.7937	19.8087	uORF
FBtr0080274_14	262.446	42.0792	133.066	50.8841	uORF
FBtr0080291_26	241.998	241.313	155.077	158.012	uORF
FBtr0080294_295	18.5271	31.1247	30.3481	70.5106	uORF
FBtr0080294_35	21.4483	9.21584	16.8969	18.991	uORF
FBtr0080308_6	50.6602	100.275	13.2284	126.119	uORF
FBtr0080308_78	34.5937	92.7435	8.33701	109.764	uORF
FBtr0080309_19	9.76356	1	3.44567	4.27109	uORF
FBtr0080309_2	9.76356	1	3.44567	4.27109	uORF
FBtr0080332_120	8.30297	3.05396	7.11418	5.08886	uORF
FBtr0080332_31	50.6602	50.9797	24.2339	59.8795	uORF
FBtr0080332_87	8.30297	8.53119	9.55985	12.4488	uORF
FBtr0080336_428	9.76356	2.36931	3.44567	1.81777	uORF
FBtr0080336_491	18.5271	10.5851	8.33701	2.63554	uORF
FBtr0080336_497	18.5271	8.53119	8.33701	2.63554	uORF
FBtr0080336_755	15.6059	9.21584	7.11418	4.27109	uORF
FBtr0080336_90	6.84237	3.05396	2.22284	5.08886	uORF
FBtr0080344_417	14.1453	17.4317	13.2284	17.3554	uORF
FBtr0080389_109	561.868	87.951	211.328	384.535	uORF
FBtr0080428_576	11.2242	13.3238	14.4512	26.3509	uORF
FBtr0080430_68	3.92119	2.36931	2.22284	4.27109	uORF
FBtr0080434_109	11.2242	3.05396	4.66851	18.1732	uORF
FBtr0080434_224	11.2242	5.79257	18.1197	28.8042	uORF
FBtr0080436_80	15.6059	31.1247	15.674	50.0663	uORF
FBtr0080438_162	46.2784	28.3861	31.5709	41.0708	uORF
FBtr0080438_312	30.2119	30.4401	24.2339	18.991	uORF
FBtr0080438_316	41.8966	31.1247	15.674	9.99548	uORF
FBtr0080438_330	15.6059	24.9629	21.7882	15.7199	uORF
FBtr0080439_362	62.3449	55.7723	37.6851	117.941	uORF
FBtr0080449_50	298.961	16.0624	64.5875	65.6039	uORF
FBtr0080461_105	5.38178	20.8549	2.22284	9.99548	uORF
FBtr0080461_198	5.38178	8.53119	5.89134	10.8133	uORF
FBtr0080461_207	5.38178	8.53119	5.89134	9.17771	uORF
FBtr0080461_360	5.38178	1	3.44567	1	uORF
FBtr0080461_486	5.38178	1.68465	2.22284	1	uORF
FBtr0080468_102	9.76356	14.0084	16.8969	14.9021	uORF
FBtr0080468_214	24.3695	3.73861	15.674	9.17771	uORF
FBtr0080468_288	17.0665	3.05396	16.8969	1.81777	uORF
FBtr0080484_106	8.30297	3.05396	8.33701	3.45331	uORF
FBtr0080484_157	21.4483	2.36931	20.5654	18.991	uORF
FBtr0080484_330	18.5271	1	5.89134	1.81777	uORF
FBtr0080484_67	9.76356	3.73861	8.33701	14.9021	uORF
FBtr0080488_127	3.92119	1.68465	2.22284	9.17771	uORF
FBtr0080488_133	3.92119	1.68465	2.22284	6.7244	uORF
FBtr0080489_56	38.9754	39.3406	27.9024	43.5241	uORF
FBtr0080489_84	46.2784	26.3322	31.5709	15.7199	uORF
FBtr0080498_70	6.84237	2.36931	3.44567	14.9021	uORF
FBtr0080509_110	50.6602	9.90049	29.1252	5.90663	uORF
FBtr0080509_202	9.76356	5.79257	2.22284	5.90663	uORF
FBtr0080509_491	17.0665	8.53119	20.5654	8.35994	uORF
FBtr0080509_498	5.38178	1	13.2284	1	uORF
FBtr0080509_522	8.30297	7.84653	12.0055	8.35994	uORF
FBtr0080509_527	6.84237	6.47723	10.7827	5.90663	uORF
FBtr0080513_135	11.2242	2.36931	10.7827	2.63554	uORF
FBtr0080513_249	9.76356	6.47723	7.11418	6.7244	uORF
FBtr0080513_292	17.0665	14.6931	14.4512	17.3554	uORF
FBtr0080513_304	15.6059	11.2698	13.2284	11.631	uORF
FBtr0080513_344	22.9089	16.0624	16.8969	27.9865	uORF
FBtr0080513_393	14.1453	7.84653	12.0055	18.1732	uORF
FBtr0080513_430	41.8966	19.4856	31.5709	26.3509	uORF
FBtr0080513_454	41.8966	14.6931	30.3481	22.2621	uORF
FBtr0080513_463	40.436	14.0084	29.1252	18.991	uORF
FBtr0080513_478	40.436	10.5851	27.9024	17.3554	uORF
FBtr0080513_8	65.2661	16.747	46.2449	46.7952	uORF
FBtr0080527_169	49.1996	18.1163	18.1197	22.2621	uORF
FBtr0080534_79	27.2907	16.747	20.5654	11.631	uORF
FBtr0080537_64	9.76356	1	3.44567	3.45331	uORF
FBtr0080537_70	11.2242	3.05396	8.33701	4.27109	uORF
FBtr0080537_97	19.9877	12.6391	21.7882	44.3419	uORF
FBtr0080541_208	34.5937	9.90049	18.1197	6.7244	uORF
FBtr0080546_203	8.30297	3.05396	8.33701	5.08886	uORF
FBtr0080546_350	15.6059	9.21584	8.33701	13.2666	uORF
FBtr0080561_174	6.84237	1	7.11418	1	uORF
FBtr0080602_33	60.8843	12.6391	2.22284	24.7154	uORF
FBtr0080618_8	445.02	26.3322	162.414	86.866	uORF
FBtr0080624_78	3.92119	14.0084	4.66851	53.3374	uORF
FBtr0080627_101	6.84237	1.68465	2.22284	1	uORF
FBtr0080627_25	2.46059	1.68465	4.66851	1	uORF
FBtr0080627_51	6.84237	1.68465	3.44567	1	uORF
FBtr0080702_231	3.92119	1	2.22284	1.81777	uORF
FBtr0080702_246	3.92119	1	2.22284	1	uORF
FBtr0080702_391	3.92119	1.68465	2.22284	1	uORF
FBtr0080702_421	3.92119	1.68465	2.22284	1	uORF
FBtr0080702_55	9.76356	2.36931	5.89134	2.63554	uORF
FBtr0080702_556	6.84237	1	3.44567	1	uORF
FBtr0080702_628	2.46059	1	3.44567	2.63554	uORF
FBtr0080702_719	18.5271	9.21584	12.0055	7.54217	uORF
FBtr0080702_729	19.9877	9.90049	12.0055	5.08886	uORF
FBtr0080702_748	19.9877	3.73861	10.7827	1.81777	uORF
FBtr0080702_846	2.46059	2.36931	4.66851	1	uORF
FBtr0080718_169	74.0297	7.16188	91.4898	8.35994	uORF
FBtr0080722_25	9.76356	15.3777	10.7827	23.0798	uORF
FBtr0080723_105	2.46059	9.21584	3.44567	7.54217	uORF
FBtr0080723_250	8.30297	1	5.89134	4.27109	uORF
FBtr0080723_271	3.92119	1	4.66851	1	uORF
FBtr0080826_147	3.92119	1	3.44567	1	uORF
FBtr0080831_171	43.3572	7.84653	35.2394	18.1732	uORF
FBtr0080831_217	9.76356	1	10.7827	1	uORF
FBtr0080838_108	2.46059	1	5.89134	1.81777	uORF
FBtr0080838_328	6.84237	1.68465	4.66851	5.08886	uORF
FBtr0080838_522	11.2242	1	9.55985	1	uORF
FBtr0080850_160	6.84237	2.36931	3.44567	1	uORF
FBtr0080854_190	50.6602	7.84653	34.0166	27.9865	uORF
FBtr0080854_384	21.4483	13.3238	18.1197	20.6265	uORF
FBtr0080854_435	28.7513	7.16188	19.3425	10.8133	uORF
FBtr0080854_441	28.7513	2.36931	19.3425	3.45331	uORF
FBtr0080856_145	12.6847	7.84653	19.3425	9.99548	uORF
FBtr0080856_268	15.6059	31.8094	20.5654	56.6085	uORF
FBtr0080856_514	141.217	299.509	150.186	442.597	uORF
FBtr0080856_520	138.296	291.978	150.186	425.423	uORF
FBtr0080856_556	113.466	237.89	126.952	346.1	uORF
FBtr0080856_779	88.6356	5.79257	96.3812	13.2666	uORF
FBtr0080866_28	72.5691	20.1703	43.7992	18.1732	uORF
FBtr0080876_211	19.9877	1.68465	20.5654	8.35994	uORF
FBtr0080876_32	3.92119	1	2.22284	1.81777	uORF
FBtr0080876_618	6.84237	1	2.22284	1	uORF
FBtr0080876_621	6.84237	1	2.22284	1	uORF
FBtr0080880_57	17.0665	5.10792	8.33701	11.631	uORF
FBtr0080908_84	34.5937	35.2327	13.2284	41.0708	uORF
FBtr0080911_78	9.76356	2.36931	12.0055	32.0753	uORF
FBtr0080911_87	9.76356	1.68465	12.0055	18.991	uORF
FBtr0080919_4	5.38178	1	3.44567	51.7018	uORF
FBtr0080919_81	2.46059	5.10792	3.44567	30.4398	uORF
FBtr0080927_97	6.84237	1	3.44567	1.81777	uORF
FBtr0080976_13	5.38178	4.42327	2.22284	1.81777	uORF
FBtr0080976_63	3.92119	1	2.22284	1.81777	uORF
FBtr0080989_2	519.511	70.15	251.681	139.203	uORF
FBtr0080989_6	344.239	31.1247	166.083	29.622	uORF
FBtr0080994_232	17.0665	13.3238	30.3481	28.8042	uORF
FBtr0080994_267	12.6847	5.10792	24.2339	19.8087	uORF
FBtr0081007_419	2.46059	1	4.66851	1	uORF
FBtr0081035_136	84.2538	215.296	43.7992	221.798	uORF
FBtr0081035_91	36.0542	44.8178	19.3425	85.2305	uORF
FBtr0081061_82	47.739	9.90049	26.6795	14.9021	uORF
FBtr0081069_297	18.5271	28.3861	9.55985	31.2575	uORF
FBtr0081069_323	22.9089	75.6272	14.4512	29.622	uORF
FBtr0081092_26	9.76356	3.05396	9.55985	11.631	uORF
FBtr0081102_84	66.7267	265.961	12.0055	304.393	uORF
FBtr0081122_88	390.978	176.271	222.333	230.794	uORF
FBtr0081126_184	50.6602	11.9545	32.7937	14.0843	uORF
FBtr0081126_226	52.1208	16.0624	48.6906	10.8133	uORF
FBtr0081142_195	2.46059	1	4.66851	5.90663	uORF
FBtr0081142_308	15.6059	2.36931	8.33701	17.3554	uORF
FBtr0081142_386	30.2119	15.3777	25.4567	18.991	uORF
FBtr0081142_446	12.6847	3.05396	12.0055	2.63554	uORF
FBtr0081142_477	8.30297	5.10792	9.55985	4.27109	uORF
FBtr0081144_122	31.6725	1.68465	25.4567	1.81777	uORF
FBtr0081148_102	3.92119	2.36931	7.11418	6.7244	uORF
FBtr0081148_133	9.76356	1.68465	23.011	8.35994	uORF
FBtr0081148_305	38.9754	8.53119	34.0166	12.4488	uORF
FBtr0081148_551	31.6725	7.84653	32.7937	4.27109	uORF
FBtr0081148_709	28.7513	4.42327	15.674	4.27109	uORF
FBtr0081162_52	21.4483	5.10792	13.2284	10.8133	uORF
FBtr0081174_1070	9.76356	3.05396	9.55985	2.63554	uORF
FBtr0081174_1112	17.0665	5.10792	12.0055	3.45331	uORF
FBtr0081174_1183	14.1453	14.6931	14.4512	14.9021	uORF
FBtr0081174_160	6.84237	1.68465	3.44567	11.631	uORF
FBtr0081174_504	2.46059	1.68465	3.44567	14.9021	uORF
FBtr0081174_607	6.84237	9.21584	14.4512	21.4443	uORF
FBtr0081174_646	6.84237	5.10792	13.2284	7.54217	uORF
FBtr0081174_704	11.2242	17.4317	3.44567	1.81777	uORF
FBtr0081174_768	3.92119	1	7.11418	4.27109	uORF
FBtr0081174_781	8.30297	14.0084	9.55985	24.7154	uORF
FBtr0081174_902	17.0665	10.5851	29.1252	27.1687	uORF
FBtr0081186_174	88.6356	10.5851	58.4733	10.8133	uORF
FBtr0081186_206	6.84237	1.68465	5.89134	1.81777	uORF
FBtr0081186_61	11.2242	3.73861	4.66851	5.90663	uORF
FBtr0081187_80	40.436	3.73861	15.674	4.27109	uORF
FBtr0081206_139	34.5937	3.05396	18.1197	3.45331	uORF
FBtr0081208_122	5.38178	1.68465	2.22284	1.81777	uORF
FBtr0081208_58	3.92119	1	3.44567	1	uORF
FBtr0081211_296	8.30297	3.73861	8.33701	4.27109	uORF
FBtr0081221_55	44.8178	1	18.1197	1	uORF
FBtr0081247_188	21.4483	9.21584	23.011	22.2621	uORF
FBtr0081247_265	3.92119	1.68465	9.55985	1.81777	uORF
FBtr0081247_314	9.76356	1	4.66851	1	uORF
FBtr0081257_186	12.6847	11.9545	5.89134	54.9729	uORF
FBtr0081257_190	24.3695	11.9545	5.89134	20.6265	uORF
FBtr0081257_194	12.6847	3.73861	5.89134	7.54217	uORF
FBtr0081257_28	11.2242	9.21584	2.22284	14.0843	uORF
FBtr0081267_182	57.9631	50.9797	49.9134	80.3238	uORF
FBtr0081267_254	22.9089	1	19.3425	12.4488	uORF
FBtr0081267_78	24.3695	19.4856	16.8969	50.0663	uORF
FBtr0081287_45	5.38178	2.36931	3.44567	14.0843	uORF
FBtr0081318_120	14.1453	14.6931	3.44567	15.7199	uORF
FBtr0081318_76	5.38178	1	4.66851	1.81777	uORF
FBtr0081324_140	18.5271	7.16188	10.7827	3.45331	uORF
FBtr0081324_168	17.0665	23.5936	13.2284	15.7199	uORF
FBtr0081324_196	3.92119	5.10792	7.11418	3.45331	uORF
FBtr0081324_231	9.76356	14.0084	5.89134	13.2666	uORF
FBtr0081324_73	17.0665	12.6391	4.66851	8.35994	uORF
FBtr0081327_271	17.0665	3.05396	16.8969	11.631	uORF
FBtr0081352_111	21.4483	19.4856	40.1307	45.9774	uORF
FBtr0081352_117	19.9877	9.90049	37.6851	15.7199	uORF
FBtr0081352_211	38.9754	5.79257	47.4678	54.9729	uORF
FBtr0081352_277	31.6725	36.602	21.7882	47.613	uORF
FBtr0081352_312	28.7513	4.42327	13.2284	28.8042	uORF
FBtr0081352_529	41.8966	14.0084	51.1363	42.7063	uORF
FBtr0081358_323	40.436	9.90049	34.0166	8.35994	uORF
FBtr0081369_166	8.30297	5.10792	5.89134	11.631	uORF
FBtr0081369_184	11.2242	4.42327	4.66851	4.27109	uORF
FBtr0081369_203	8.30297	9.21584	2.22284	26.3509	uORF
FBtr0081369_240	28.7513	8.53119	16.8969	18.1732	uORF
FBtr0081369_314	14.1453	3.73861	10.7827	1.81777	uORF
FBtr0081399_168	2.46059	1	2.22284	1	uORF
FBtr0081399_98	12.6847	3.05396	8.33701	7.54217	uORF
FBtr0081403_144	11.2242	3.05396	4.66851	2.63554	uORF
FBtr0081403_294	8.30297	9.21584	8.33701	11.631	uORF
FBtr0081403_321	11.2242	3.05396	10.7827	7.54217	uORF
FBtr0081416_123	40.436	8.53119	16.8969	9.99548	uORF
FBtr0081439_56	9.76356	1.68465	7.11418	1.81777	uORF
FBtr0081465_26	14.1453	9.90049	12.0055	10.8133	uORF
FBtr0081468_68	3.92119	1	5.89134	1	uORF
FBtr0081483_221	24.3695	10.5851	16.8969	27.9865	uORF
FBtr0081483_362	17.0665	9.90049	15.674	23.8976	uORF
FBtr0081512_145	566.25	541.191	843.534	1268.55	uORF
FBtr0081512_175	475.693	465.88	690.679	983.961	uORF
FBtr0081512_18	244.919	807.521	415.541	1230.11	uORF
FBtr0081512_83	186.495	204.342	337.28	471.219	uORF
FBtr0081538_104	74.0297	24.2782	49.9134	34.5286	uORF
FBtr0081538_135	87.175	101.644	48.6906	72.1461	uORF
FBtr0081553_162	52.1208	1	31.5709	1.81777	uORF
FBtr0081564_97	15.6059	2.36931	12.0055	5.90663	uORF
FBtr0081599_20	9.76356	1	2.22284	2.63554	uORF
FBtr0081621_232	3.92119	3.05396	3.44567	5.08886	uORF
FBtr0081621_24	19.9877	3.73861	12.0055	9.17771	uORF
FBtr0081621_364	3.92119	3.05396	7.11418	2.63554	uORF
FBtr0081621_391	17.0665	3.05396	8.33701	5.90663	uORF
FBtr0081720_121	142.678	30.4401	91.4898	53.3374	uORF
FBtr0081720_238	122.229	24.2782	56.0276	21.4443	uORF
FBtr0081720_33	17.0665	9.90049	7.11418	23.0798	uORF
FBtr0081720_390	190.877	94.7975	101.273	95.8615	uORF
FBtr0081720_397	199.641	122.868	100.05	114.67	uORF
FBtr0081720_403	186.495	118.076	93.9355	113.852	uORF
FBtr0081720_412	160.205	104.383	84.1528	106.493	uORF
FBtr0081720_54	15.6059	9.21584	4.66851	16.5377	uORF
FBtr0081728_2	17.0665	12.6391	8.33701	10.8133	uORF
FBtr0081728_27	9.76356	7.16188	4.66851	5.90663	uORF
FBtr0081728_33	9.76356	6.47723	4.66851	3.45331	uORF
FBtr0081753_113	21.4483	25.6475	10.7827	40.253	uORF
FBtr0081753_153	14.1453	7.16188	3.44567	1	uORF
FBtr0081753_95	27.2907	33.1787	15.674	59.8795	uORF
FBtr0081763_18	22.9089	4.42327	5.89134	16.5377	uORF
FBtr0081763_43	50.6602	14.6931	32.7937	33.7109	uORF
FBtr0081763_52	50.6602	14.6931	32.7937	32.0753	uORF
FBtr0081763_62	27.2907	3.73861	9.55985	10.8133	uORF
FBtr0081763_80	21.4483	2.36931	9.55985	3.45331	uORF
FBtr0081765_27	14.1453	23.5936	2.22284	28.8042	uORF
FBtr0081765_47	21.4483	7.84653	3.44567	6.7244	uORF
FBtr0081780_62	22.9089	11.2698	5.89134	26.3509	uORF
FBtr0081792_266	9.76356	1.68465	15.674	1.81777	uORF
FBtr0081792_499	25.8301	5.10792	18.1197	4.27109	uORF
FBtr0081792_505	24.3695	1.68465	18.1197	3.45331	uORF
FBtr0081806_123	18.5271	4.42327	16.8969	18.991	uORF
FBtr0081823_151	74.0297	20.1703	34.0166	12.4488	uORF
FBtr0081823_178	90.0962	24.2782	37.6851	61.5151	uORF
FBtr0081823_27	38.9754	1	18.1197	4.27109	uORF
FBtr0081841_99	2.46059	2.36931	2.22284	3.45331	uORF
FBtr0081843_113	24.3695	10.5851	21.7882	9.99548	uORF
FBtr0081843_132	18.5271	19.4856	19.3425	11.631	uORF
FBtr0081887_132	19.9877	3.05396	18.1197	3.45331	uORF
FBtr0081887_31	11.2242	6.47723	8.33701	15.7199	uORF
FBtr0081887_91	28.7513	34.548	20.5654	44.3419	uORF
FBtr0081892_4	2.46059	1	2.22284	1	uORF
FBtr0081892_44	3.92119	1	8.33701	1	uORF
FBtr0081892_50	30.2119	9.21584	34.0166	25.5331	uORF
FBtr0081915_101	5.38178	1.68465	5.89134	6.7244	uORF
FBtr0081922_96	2.46059	7.16188	7.11418	2.63554	uORF
FBtr0081931_114	47.739	4.42327	38.9079	14.9021	uORF
FBtr0081931_12	231.774	143.408	185.648	168.643	uORF
FBtr0081931_132	57.9631	4.42327	46.2449	27.1687	uORF
FBtr0081931_389	183.574	19.4856	349.508	266.776	uORF
FBtr0081931_41	224.471	50.9797	181.98	62.3329	uORF
FBtr0081947_110	8.30297	1	3.44567	1	uORF
FBtr0081947_29	5.38178	3.73861	3.44567	2.63554	uORF
FBtr0081947_36	11.2242	4.42327	5.89134	5.08886	uORF
FBtr0081959_12	3.92119	3.73861	3.44567	11.631	uORF
FBtr0081965_110	27.2907	11.2698	16.8969	13.2666	uORF
FBtr0081968_60	2.46059	2.36931	3.44567	5.08886	uORF
FBtr0081978_59	40.436	9.90049	34.0166	23.0798	uORF
FBtr0081979_44	11.2242	6.47723	4.66851	4.27109	uORF
FBtr0081979_63	6.84237	4.42327	3.44567	1.81777	uORF
FBtr0081981_11	6.84237	2.36931	2.22284	2.63554	uORF
FBtr0081981_44	6.84237	1	2.22284	1	uORF
FBtr0081990_303	9.76356	1	2.22284	1	uORF
FBtr0081990_42	2.46059	1.68465	2.22284	1	uORF
FBtr0081990_517	11.2242	1	8.33701	6.7244	uORF
FBtr0082005_74	6.84237	8.53119	9.55985	7.54217	uORF
FBtr0082011_161	11.2242	13.3238	18.1197	36.1642	uORF
FBtr0082011_180	5.38178	9.21584	12.0055	30.4398	uORF
FBtr0082011_188	6.84237	1.68465	16.8969	23.8976	uORF
FBtr0082074_106	27.2907	4.42327	23.011	3.45331	uORF
FBtr0082074_276	90.0962	11.2698	45.0221	2.63554	uORF
FBtr0082075_952	18.5271	16.0624	13.2284	22.2621	uORF
FBtr0082078_65	5.38178	1	7.11418	1	uORF
FBtr0082091_415	22.9089	6.47723	7.11418	5.08886	uORF
FBtr0082091_63	2.46059	1	3.44567	1.81777	uORF
FBtr0082102_199	75.4903	48.9257	34.0166	28.8042	uORF
FBtr0082102_20	6.84237	9.21584	2.22284	23.0798	uORF
FBtr0082102_204	33.1331	11.9545	19.3425	12.4488	uORF
FBtr0082102_344	43.3572	40.0252	36.4622	46.7952	uORF
FBtr0082102_393	44.8178	11.2698	27.9024	6.7244	uORF
FBtr0082109_113	3.92119	1	2.22284	1	uORF
FBtr0082109_157	84.2538	9.90049	35.2394	19.8087	uORF
FBtr0082109_96	6.84237	1.68465	2.22284	2.63554	uORF
FBtr0082114_103	19.9877	44.8178	9.55985	59.8795	uORF
FBtr0082130_129	5.38178	1.68465	5.89134	8.35994	uORF
FBtr0082130_308	17.0665	19.4856	9.55985	9.17771	uORF
FBtr0082130_317	17.0665	6.47723	9.55985	4.27109	uORF
FBtr0082139_103	55.042	49.6104	60.9189	62.3329	uORF
FBtr0082139_121	44.8178	37.9713	48.6906	54.1551	uORF
FBtr0082155_235	25.8301	9.90049	24.2339	9.99548	uORF
FBtr0082155_360	18.5271	10.5851	13.2284	33.7109	uORF
FBtr0082155_413	3.92119	2.36931	5.89134	17.3554	uORF
FBtr0082155_547	30.2119	7.16188	16.8969	9.99548	uORF
FBtr0082155_553	30.2119	7.16188	16.8969	9.17771	uORF
FBtr0082155_569	25.8301	1	8.33701	1	uORF
FBtr0082155_593	25.8301	5.10792	15.674	13.2666	uORF
FBtr0082170_174	5.38178	1	10.7827	1	uORF
FBtr0082170_349	6.84237	2.36931	2.22284	6.7244	uORF
FBtr0082170_437	9.76356	13.3238	8.33701	10.8133	uORF
FBtr0082170_453	6.84237	8.53119	3.44567	8.35994	uORF
FBtr0082170_471	11.2242	1.68465	7.11418	2.63554	uORF
FBtr0082170_530	5.38178	7.84653	4.66851	14.0843	uORF
FBtr0082170_538	5.38178	4.42327	3.44567	7.54217	uORF
FBtr0082170_598	8.30297	2.36931	4.66851	5.08886	uORF
FBtr0082170_8	2.46059	5.79257	4.66851	3.45331	uORF
FBtr0082179_65	52.1208	42.7638	40.1307	65.6039	uORF
FBtr0082181_1	79.872	2.36931	41.3536	5.90663	uORF
FBtr0082181_15	221.55	155.047	112.278	41.8886	uORF
FBtr0082181_162	110.545	146.831	126.952	279.042	uORF
FBtr0082181_175	59.4237	44.1332	47.4678	87.6838	uORF
FBtr0082181_192	106.163	132.453	111.055	251.238	uORF
FBtr0082181_223	69.6479	84.5277	84.1528	144.928	uORF
FBtr0082181_243	53.5814	63.9881	85.3757	85.2305	uORF
FBtr0082181_267	41.8966	7.16188	52.3591	9.99548	uORF
FBtr0082181_473	91.5568	4.42327	67.0331	14.9021	uORF
FBtr0082181_606	28.7513	127.661	49.9134	184.181	uORF
FBtr0082181_659	72.5691	96.1668	48.6906	219.345	uORF
FBtr0082181_680	63.8055	70.8346	37.6851	164.554	uORF
FBtr0082181_9	221.55	155.047	112.278	42.7063	uORF
FBtr0082186_219	19.9877	1.68465	12.0055	1.81777	uORF
FBtr0082186_281	19.9877	13.3238	12.0055	7.54217	uORF
FBtr0082186_354	15.6059	33.1787	5.89134	31.2575	uORF
FBtr0082186_364	12.6847	22.2242	2.22284	20.6265	uORF
FBtr0082246_712	3.92119	5.79257	5.89134	24.7154	uORF
FBtr0082255_1041	40.436	4.42327	42.5764	21.4443	uORF
FBtr0082255_141	43.3572	3.05396	37.6851	10.8133	uORF
FBtr0082255_486	56.5026	8.53119	35.2394	24.7154	uORF
FBtr0082255_6	171.889	8.53119	124.506	17.3554	uORF
FBtr0082255_656	41.8966	52.349	68.256	54.9729	uORF
FBtr0082255_664	59.4237	2.36931	85.3757	3.45331	uORF
FBtr0082255_677	59.4237	8.53119	87.8213	13.2666	uORF
FBtr0082255_694	132.453	68.7807	146.517	112.217	uORF
FBtr0082255_697	129.532	66.7267	140.403	108.946	uORF
FBtr0082255_803	11.2242	7.16188	18.1197	27.9865	uORF
FBtr0082255_808	9.76356	6.47723	15.674	20.6265	uORF
FBtr0082255_968	24.3695	15.3777	31.5709	81.9594	uORF
FBtr0082264_78	2.46059	1	16.8969	1.81777	uORF
FBtr0082280_59	110.545	24.2782	139.18	21.4443	uORF
FBtr0082286_75	8.30297	1	3.44567	2.63554	uORF
FBtr0082295_62	5.38178	1	5.89134	1.81777	uORF
FBtr0082364_37	15.6059	3.73861	21.7882	6.7244	uORF
FBtr0082366_70	5.38178	14.6931	4.66851	10.8133	uORF
FBtr0082366_78	6.84237	11.2698	7.11418	12.4488	uORF
FBtr0082413_87	9.76356	2.36931	5.89134	4.27109	uORF
FBtr0082508_121	103.242	59.1955	16.8969	40.253	uORF
FBtr0082517_270	36.0542	7.84653	25.4567	23.0798	uORF
FBtr0082517_32	72.5691	12.6391	14.4512	8.35994	uORF
FBtr0082517_346	33.1331	8.53119	30.3481	12.4488	uORF
FBtr0082517_359	28.7513	7.16188	27.9024	6.7244	uORF
FBtr0082517_558	9.76356	3.05396	23.011	23.8976	uORF
FBtr0082517_574	14.1453	6.47723	3.44567	14.0843	uORF
FBtr0082517_752	9.76356	21.5396	5.89134	41.0708	uORF
FBtr0082528_102	18.5271	25.6475	8.33701	26.3509	uORF
FBtr0082528_106	14.1453	5.10792	5.89134	5.08886	uORF
FBtr0082528_36	24.3695	36.602	8.33701	31.2575	uORF
FBtr0082528_81	19.9877	33.1787	8.33701	28.8042	uORF
FBtr0082529_151	6.84237	1	3.44567	1	uORF
FBtr0082531_226	2.46059	1	2.22284	1	uORF
FBtr0082531_285	5.38178	15.3777	10.7827	22.2621	uORF
FBtr0082531_368	24.3695	8.53119	16.8969	24.7154	uORF
FBtr0082534_435	373.451	29.0708	388.639	26.3509	uORF
FBtr0082534_52	122.229	69.4653	104.941	44.3419	uORF
FBtr0082534_655	93.0174	3.05396	113.501	4.27109	uORF
FBtr0082548_165	74.0297	15.3777	46.2449	9.99548	uORF
FBtr0082548_80	144.138	200.234	70.7016	141.657	uORF
FBtr0082548_94	218.628	88.6356	95.1583	91.7726	uORF
FBtr0082563_234	6.84237	3.05396	9.55985	18.991	uORF
FBtr0082563_24	15.6059	1	13.2284	1	uORF
FBtr0082563_247	8.30297	1	8.33701	3.45331	uORF
FBtr0082563_85	22.9089	2.36931	13.2284	10.8133	uORF
FBtr0082596_5	9.76356	1	10.7827	5.90663	uORF
FBtr0082598_5	5.38178	1.68465	5.89134	1	uORF
FBtr0082632_272	17.0665	9.90049	18.1197	24.7154	uORF
FBtr0082632_88	22.9089	5.10792	14.4512	23.8976	uORF
FBtr0082634_37	5.38178	1	2.22284	1	uORF
FBtr0082634_45	5.38178	1	2.22284	1	uORF
FBtr0082704_141	2.46059	1.68465	2.22284	4.27109	uORF
FBtr0082717_191	24.3695	16.747	16.8969	19.8087	uORF
FBtr0082717_258	37.5148	38.6559	30.3481	31.2575	uORF
FBtr0082743_164	9.76356	1.68465	3.44567	5.08886	uORF
FBtr0082743_239	18.5271	3.73861	7.11418	10.8133	uORF
FBtr0082743_307	6.84237	1	7.11418	3.45331	uORF
FBtr0082747_112	81.3326	9.90049	46.2449	32.0753	uORF
FBtr0082763_37	2.46059	3.05396	3.44567	8.35994	uORF
FBtr0082780_250	17.0665	55.0876	14.4512	171.096	uORF
FBtr0082780_256	17.0665	22.9089	14.4512	84.4127	uORF
FBtr0082780_433	44.8178	36.602	24.2339	26.3509	uORF
FBtr0082780_709	56.5026	43.4485	37.6851	34.5286	uORF
FBtr0082780_791	166.047	22.2242	71.9245	54.9729	uORF
FBtr0082793_141	11.2242	7.84653	14.4512	24.7154	uORF
FBtr0082793_538	18.5271	17.4317	19.3425	15.7199	uORF
FBtr0082797_117	38.9754	29.7554	43.7992	90.1371	uORF
FBtr0082817_133	12.6847	10.5851	9.55985	18.991	uORF
FBtr0082817_167	11.2242	4.42327	46.2449	57.4262	uORF
FBtr0082817_298	18.5271	24.9629	9.55985	43.5241	uORF
FBtr0082828_1	74.0297	3.73861	59.6961	5.90663	uORF
FBtr0082828_170	113.466	39.3406	63.3646	53.3374	uORF
FBtr0082828_82	43.3572	27.7015	47.4678	25.5331	uORF
FBtr0082828_92	46.2784	13.3238	51.1363	12.4488	uORF
FBtr0082865_86	141.217	40.0252	122.061	21.4443	uORF
FBtr0082865_92	141.217	32.494	114.724	18.991	uORF
FBtr0082921_28	9.76356	1	14.4512	1.81777	uORF
FBtr0082921_61	9.76356	1	13.2284	1.81777	uORF
FBtr0082941_201	8.30297	9.21584	4.66851	6.7244	uORF
FBtr0082941_237	6.84237	8.53119	3.44567	5.90663	uORF
FBtr0082941_286	2.46059	2.36931	2.22284	1	uORF
FBtr0082941_302	2.46059	2.36931	2.22284	3.45331	uORF
FBtr0082945_195	2.46059	1	2.22284	2.63554	uORF
FBtr0082947_1259	2.46059	7.16188	3.44567	15.7199	uORF
FBtr0082947_1265	2.46059	5.79257	3.44567	8.35994	uORF
FBtr0082947_307	22.9089	7.16188	10.7827	7.54217	uORF
FBtr0082947_438	5.38178	1.68465	2.22284	1	uORF
FBtr0082947_628	18.5271	32.494	5.89134	32.8931	uORF
FBtr0082947_761	5.38178	12.6391	2.22284	3.45331	uORF
FBtr0082947_769	5.38178	11.9545	2.22284	7.54217	uORF
FBtr0082947_775	3.92119	7.84653	2.22284	5.90663	uORF
FBtr0082947_778	3.92119	1.68465	2.22284	5.08886	uORF
FBtr0082947_791	5.38178	1	2.22284	1	uORF
FBtr0082947_801	17.0665	40.0252	5.89134	28.8042	uORF
FBtr0082947_804	17.0665	40.0252	5.89134	28.8042	uORF
FBtr0082947_807	17.0665	38.6559	5.89134	27.9865	uORF
FBtr0082947_816	17.0665	35.9173	5.89134	27.1687	uORF
FBtr0082947_819	15.6059	35.9173	5.89134	27.1687	uORF
FBtr0082947_825	14.1453	35.9173	5.89134	27.1687	uORF
FBtr0082947_831	14.1453	35.9173	5.89134	26.3509	uORF
FBtr0082947_840	14.1453	30.4401	4.66851	21.4443	uORF
FBtr0082960_177	36.0542	3.73861	15.674	16.5377	uORF
FBtr0082960_419	24.3695	1.68465	25.4567	4.27109	uORF
[truncated: 7,531 more rows]
