# Supplementary material for: Upstream open reading frames buffer translational variability during Drosophila evolution and development
Source: eLife. 2025 Jun 6;14:RP104074. doi: 10.7554/eLife.104074 (PMC12143884; doi:10.7554/eLife.104074)
Supplement: Figure 3—figure supplement 5—source data 1. [file elife-104074-fig3-figsupp5-data1.xlsx]

## Sheet: figS20
# em02 = "embryo 0-2 h", "em26" = "embryo 2-6 h", "em612" = "embryo 6-12 h", "em1224" = "embryo 12-24 h","larva" = "larva", "pupa" = "pupa", "fem" = "female body", "mal" = "male body", "FH" = "female head", "MH" = "male head"
Stages	Transcript_id	abs_log2Beta_CDS	Gene_class
MH	FBtr0070066	-0.763683	class1
MH	FBtr0070080	-0.172092	class1
MH	FBtr0070091	0.079494	class1
MH	FBtr0070123	-0.316452	class1
MH	FBtr0070202	2.613	class1
MH	FBtr0070209	0.151665	class1
MH	FBtr0070253	-0.660298	class1
MH	FBtr0070259	0.236538	class1
MH	FBtr0070260	0.67814	class1
MH	FBtr0070283	-0.00888742	class1
MH	FBtr0070293	-0.461499	class1
MH	FBtr0070308	0.138631	class1
MH	FBtr0070317	0.70892	class1
MH	FBtr0070318	0.162065	class1
MH	FBtr0070330	0.740696	class1
MH	FBtr0070346	-0.111774	class1
MH	FBtr0070363	0.370796	class1
MH	FBtr0070379	-0.223034	class1
MH	FBtr0070389	-0.205981	class1
MH	FBtr0070393	-0.414823	class1
MH	FBtr0070401	0.228079	class1
MH	FBtr0070406	-0.511756	class1
MH	FBtr0070412	0.087983	class1
MH	FBtr0070414	-0.146547	class1
MH	FBtr0070419	-0.13273	class1
MH	FBtr0070445	-1.13659	class1
MH	FBtr0070447	-0.946726	class1
MH	FBtr0070479	-0.0551938	class1
MH	FBtr0070508	-0.520618	class1
MH	FBtr0070525	0.752948	class1
MH	FBtr0070559	-0.640219	class1
MH	FBtr0070562	-0.66907	class1
MH	FBtr0070569	0.614031	class1
MH	FBtr0070583	0.266661	class1
MH	FBtr0070611	-0.0771233	class1
MH	FBtr0070652	0.104098	class1
MH	FBtr0070671	-0.234352	class1
MH	FBtr0070680	0.21574	class1
MH	FBtr0070686	0.0380478	class1
MH	FBtr0070688	-0.193864	class1
MH	FBtr0070701	0.317084	class1
MH	FBtr0070723	-0.375531	class1
MH	FBtr0070738	-0.323345	class1
MH	FBtr0070742	0.504284	class1
MH	FBtr0070763	-0.0749521	class1
MH	FBtr0070764	-0.140575	class1
MH	FBtr0070798	-0.329298	class1
MH	FBtr0070804	0.191711	class1
MH	FBtr0070807	0.198234	class1
MH	FBtr0070843	-0.22607	class1
MH	FBtr0070874	0.112099	class1
MH	FBtr0070891	-0.00425493	class1
MH	FBtr0070912	1.14555	class1
MH	FBtr0070921	0.159639	class1
MH	FBtr0070924	-0.0398316	class1
MH	FBtr0070937	-0.554717	class1
MH	FBtr0070950	0.31773	class1
MH	FBtr0070956	0.178212	class1
MH	FBtr0070974	0.218572	class1
MH	FBtr0070987	0.217104	class1
MH	FBtr0070994	0.247076	class1
MH	FBtr0071005	-0.371032	class1
MH	FBtr0071007	-0.448855	class1
MH	FBtr0071015	-1.87031	class1
MH	FBtr0071020	-0.130295	class1
MH	FBtr0071036	-0.594695	class1
MH	FBtr0071041	-0.302742	class1
MH	FBtr0071048	0.149438	class1
MH	FBtr0071055	-0.622742	class1
MH	FBtr0071057	-0.574788	class1
MH	FBtr0071071	0.464723	class1
MH	FBtr0071076	-0.643275	class1
MH	FBtr0071079	-0.0483992	class1
MH	FBtr0071109	-0.0159625	class1
MH	FBtr0071117	0.144525	class1
MH	FBtr0071132	-0.0273204	class1
MH	FBtr0071134	-1.59164	class1
MH	FBtr0071153	0.952221	class1
MH	FBtr0071188	-0.436468	class1
MH	FBtr0071192	0.363606	class1
MH	FBtr0071193	0.159575	class1
MH	FBtr0071212	0.08564	class1
MH	FBtr0071219	0.0863163	class1
MH	FBtr0071222	-0.638085	class1
MH	FBtr0071235	0.149156	class1
MH	FBtr0071253	0.157011	class1
MH	FBtr0071319	0.457883	class1
MH	FBtr0071332	0.0940562	class1
MH	FBtr0071363	0.336268	class1
MH	FBtr0071368	0.183232	class1
MH	FBtr0071371	-0.309416	class1
MH	FBtr0071430	0.0781549	class1
MH	FBtr0071441	1.27647	class1
MH	FBtr0071444	-0.792988	class1
MH	FBtr0071487	0.390729	class1
MH	FBtr0071522	-0.205905	class1
MH	FBtr0071526	0.39691	class1
MH	FBtr0071548	0.214064	class1
MH	FBtr0071553	-0.407658	class1
MH	FBtr0071562	-0.0317652	class1
MH	FBtr0071567	-0.478144	class1
MH	FBtr0071573	-0.309239	class1
MH	FBtr0071575	0.00704682	class1
MH	FBtr0071583	-0.19594	class1
MH	FBtr0071606	0.0751986	class1
MH	FBtr0071615	-0.213724	class1
MH	FBtr0071641	0.415687	class1
MH	FBtr0071654	-0.329618	class1
MH	FBtr0071672	-0.112477	class1
MH	FBtr0071686	-0.104185	class1
MH	FBtr0071700	-0.12386	class1
MH	FBtr0071755	0.57032	class1
MH	FBtr0071756	0.30043	class1
MH	FBtr0071758	0.276796	class1
MH	FBtr0071774	-0.281354	class1
MH	FBtr0071797	0.0834701	class1
MH	FBtr0071800	0.181249	class1
MH	FBtr0071811	-0.239252	class1
MH	FBtr0071832	0.343705	class1
MH	FBtr0071838	-0.108954	class1
MH	FBtr0071845	-0.170468	class1
MH	FBtr0071849	-0.282581	class1
MH	FBtr0071898	0.183698	class1
MH	FBtr0071899	-0.180403	class1
MH	FBtr0071907	0.00964564	class1
MH	FBtr0071922	-0.447439	class1
MH	FBtr0071934	0.023868	class1
MH	FBtr0071936	-0.0818292	class1
MH	FBtr0071979	-0.206416	class1
MH	FBtr0071994	-0.045891	class1
MH	FBtr0072010	0.877778	class1
MH	FBtr0072036	0.285477	class1
MH	FBtr0072058	0.179188	class1
MH	FBtr0072073	0.479015	class1
MH	FBtr0072084	0.047233	class1
MH	FBtr0072087	-0.0685203	class1
MH	FBtr0072097	-0.444276	class1
MH	FBtr0072117	-0.00914916	class1
MH	FBtr0072120	-0.0231726	class1
MH	FBtr0072127	-0.159864	class1
MH	FBtr0072131	-0.0254377	class1
MH	FBtr0072140	-0.0587323	class1
MH	FBtr0072156	0.170674	class1
MH	FBtr0072157	-0.133417	class1
MH	FBtr0072160	0.1365	class1
MH	FBtr0072162	-0.369666	class1
MH	FBtr0072163	0.195547	class1
MH	FBtr0072168	-0.071	class1
MH	FBtr0072204	-0.222722	class1
MH	FBtr0072205	0.252954	class1
MH	FBtr0072210	-0.45543	class1
MH	FBtr0072221	0.0512869	class1
MH	FBtr0072225	0.0708407	class1
MH	FBtr0072227	-0.4717	class1
MH	FBtr0072234	-0.701804	class1
MH	FBtr0072235	0.334814	class1
MH	FBtr0072239	-0.416411	class1
MH	FBtr0072247	-0.0379831	class1
MH	FBtr0072249	0.288899	class1
MH	FBtr0072257	0.307919	class1
MH	FBtr0072262	-0.00218013	class1
MH	FBtr0072263	-0.367894	class1
MH	FBtr0072268	0.0475403	class1
MH	FBtr0072281	-0.0501519	class1
MH	FBtr0072287	0.0904119	class1
MH	FBtr0072302	0.122148	class1
MH	FBtr0072312	-0.433491	class1
MH	FBtr0072338	0.34588	class1
MH	FBtr0072342	0.24166	class1
MH	FBtr0072362	-0.81978	class1
MH	FBtr0072364	-0.0336183	class1
MH	FBtr0072368	-0.745798	class1
MH	FBtr0072423	0.0900931	class1
MH	FBtr0072427	0.273521	class1
MH	FBtr0072429	0.186031	class1
MH	FBtr0072435	0.195985	class1
MH	FBtr0072520	0.0565081	class1
MH	FBtr0072529	-0.937303	class1
MH	FBtr0072551	0.450079	class1
MH	FBtr0072556	-0.442054	class1
MH	FBtr0072559	-0.332122	class1
MH	FBtr0072574	0.281458	class1
MH	FBtr0072587	-0.457781	class1
MH	FBtr0072594	-0.217907	class1
MH	FBtr0072596	-0.467776	class1
MH	FBtr0072602	1.36147	class1
MH	FBtr0072644	-0.607673	class1
MH	FBtr0072652	0.171455	class1
MH	FBtr0072679	0.980865	class1
MH	FBtr0072703	1.3356	class1
MH	FBtr0072711	-0.389924	class1
MH	FBtr0072735	-0.0442584	class1
MH	FBtr0072767	-1.20302	class1
MH	FBtr0072779	-0.246731	class1
MH	FBtr0072788	0.101838	class1
MH	FBtr0072792	-0.359141	class1
MH	FBtr0072826	-0.294139	class1
MH	FBtr0072828	0.369643	class1
MH	FBtr0072831	-0.573297	class1
MH	FBtr0072834	0.123133	class1
MH	FBtr0072853	0.751232	class1
MH	FBtr0072858	-0.0356493	class1
MH	FBtr0072864	0.343322	class1
MH	FBtr0072901	-0.395567	class1
MH	FBtr0072904	0.100636	class1
MH	FBtr0072930	-1.16523	class1
MH	FBtr0072931	-0.33291	class1
MH	FBtr0072951	-0.185306	class1
MH	FBtr0072955	0.399354	class1
MH	FBtr0072956	-0.21557	class1
MH	FBtr0072972	-0.024848	class1
MH	FBtr0072991	-0.997737	class1
MH	FBtr0073011	-0.250806	class1
MH	FBtr0073023	-1.00471	class1
MH	FBtr0073043	0.0566993	class1
MH	FBtr0073050	-0.52231	class1
MH	FBtr0073063	-0.434696	class1
MH	FBtr0073093	-0.116833	class1
MH	FBtr0073108	0.600496	class1
MH	FBtr0073114	0.0572185	class1
MH	FBtr0073118	-0.45959	class1
MH	FBtr0073124	-0.694331	class1
MH	FBtr0073143	-0.260053	class1
MH	FBtr0073145	-0.702592	class1
MH	FBtr0073165	-0.532153	class1
MH	FBtr0073166	0.488794	class1
MH	FBtr0073173	0.203927	class1
MH	FBtr0073176	0.119385	class1
MH	FBtr0073185	0.196893	class1
MH	FBtr0073203	-0.172736	class1
MH	FBtr0073209	-0.11853	class1
MH	FBtr0073211	0.32922	class1
MH	FBtr0073215	-0.280744	class1
MH	FBtr0073242	-0.144083	class1
MH	FBtr0073283	-0.626356	class1
MH	FBtr0073287	-0.265921	class1
MH	FBtr0073291	-0.419191	class1
MH	FBtr0073299	-0.0394679	class1
MH	FBtr0073348	0.169972	class1
MH	FBtr0073377	-0.112023	class1
MH	FBtr0073387	0.368277	class1
MH	FBtr0073393	0.230205	class1
MH	FBtr0073394	-0.605319	class1
MH	FBtr0073409	0.289901	class1
MH	FBtr0073448	0.0198637	class1
MH	FBtr0073451	-0.366948	class1
MH	FBtr0073460	0.255442	class1
MH	FBtr0073475	-0.149437	class1
MH	FBtr0073482	0.227261	class1
MH	FBtr0073503	-0.262226	class1
MH	FBtr0073509	0.581137	class1
MH	FBtr0073533	0.272009	class1
MH	FBtr0073540	0.194246	class1
MH	FBtr0073542	0.123433	class1
MH	FBtr0073607	-0.223816	class1
MH	FBtr0073655	-0.571302	class1
MH	FBtr0073657	-0.120674	class1
MH	FBtr0073658	0.165136	class1
MH	FBtr0073660	0.428788	class1
MH	FBtr0073669	0.137848	class1
MH	FBtr0073683	0.292338	class1
MH	FBtr0073691	0.124247	class1
MH	FBtr0073692	-0.354732	class1
MH	FBtr0073695	-0.240454	class1
MH	FBtr0073704	0.734683	class1
MH	FBtr0073705	0.224864	class1
MH	FBtr0073720	-0.0732388	class1
MH	FBtr0073724	0.157979	class1
MH	FBtr0073730	0.304651	class1
MH	FBtr0073754	-0.20942	class1
MH	FBtr0073756	-0.119854	class1
MH	FBtr0073767	-1.41045	class1
MH	FBtr0073776	-0.0912296	class1
MH	FBtr0073779	0.340274	class1
MH	FBtr0073787	-0.00140145	class1
MH	FBtr0073841	-0.0804233	class1
MH	FBtr0073846	-0.264567	class1
MH	FBtr0073900	-0.224163	class1
MH	FBtr0073908	0.422658	class1
MH	FBtr0073923	0.15575	class1
MH	FBtr0073940	-1.52048	class1
MH	FBtr0073946	-0.945411	class1
MH	FBtr0073958	-0.271737	class1
MH	FBtr0073970	0.251321	class1
MH	FBtr0073973	1.07594	class1
MH	FBtr0073992	0.0820041	class1
MH	FBtr0074054	-0.229981	class1
MH	FBtr0074072	0.340785	class1
MH	FBtr0074085	0.245665	class1
MH	FBtr0074104	0.23517	class1
MH	FBtr0074117	0.162667	class1
MH	FBtr0074129	0.279984	class1
MH	FBtr0074134	0.309418	class1
MH	FBtr0074144	0.406552	class1
MH	FBtr0074159	-0.185435	class1
MH	FBtr0074166	0.00823038	class1
MH	FBtr0074179	-0.282495	class1
MH	FBtr0074183	0.366771	class1
MH	FBtr0074202	0.564356	class1
MH	FBtr0074209	-0.832091	class1
MH	FBtr0074226	-0.126205	class1
MH	FBtr0074230	-0.726932	class1
MH	FBtr0074237	-0.159532	class1
MH	FBtr0074240	-0.463543	class1
MH	FBtr0074261	-0.177588	class1
MH	FBtr0074285	0.326028	class1
MH	FBtr0074290	0.197239	class1
MH	FBtr0074294	-0.157353	class1
MH	FBtr0074305	-0.368314	class1
MH	FBtr0074344	0.341775	class1
MH	FBtr0074348	0.168984	class1
MH	FBtr0074350	-0.490349	class1
MH	FBtr0074357	-0.392219	class1
MH	FBtr0074365	-0.139676	class1
MH	FBtr0074383	-0.00622718	class1
MH	FBtr0074386	-0.384091	class1
MH	FBtr0074464	-0.349983	class1
MH	FBtr0074480	0.525657	class1
MH	FBtr0074486	0.00664195	class1
MH	FBtr0074487	-0.05391	class1
MH	FBtr0074505	0.125942	class1
MH	FBtr0074527	0.175105	class1
MH	FBtr0074539	0.382821	class1
MH	FBtr0074609	-0.149443	class1
MH	FBtr0074612	-0.163997	class1
MH	FBtr0074623	-0.259711	class1
MH	FBtr0074655	0.358448	class1
MH	FBtr0074689	0.0663947	class1
MH	FBtr0074695	-0.829184	class1
MH	FBtr0074750	-0.3252	class1
MH	FBtr0074758	-1.07982	class1
MH	FBtr0074760	-1.44344	class1
MH	FBtr0074771	0.128279	class1
MH	FBtr0074795	-0.530302	class1
MH	FBtr0074810	-0.0504408	class1
MH	FBtr0074812	-0.736496	class1
MH	FBtr0074837	-0.180587	class1
MH	FBtr0074846	0.158442	class1
MH	FBtr0074847	0.0589881	class1
MH	FBtr0074848	0.0970746	class1
MH	FBtr0074870	0.173613	class1
MH	FBtr0074873	0.719643	class1
MH	FBtr0074881	0.229892	class1
MH	FBtr0074891	0.0653684	class1
MH	FBtr0074902	0.399683	class1
MH	FBtr0074903	0.448076	class1
MH	FBtr0074911	0.56471	class1
MH	FBtr0074947	-0.277486	class1
MH	FBtr0074963	0.232077	class1
MH	FBtr0074991	0.691107	class1
MH	FBtr0075018	0.475841	class1
MH	FBtr0075019	-0.260411	class1
MH	FBtr0075022	-0.711457	class1
MH	FBtr0075023	-0.402343	class1
MH	FBtr0075025	-0.674422	class1
MH	FBtr0075033	0.269666	class1
MH	FBtr0075039	0.301512	class1
MH	FBtr0075051	-0.129369	class1
MH	FBtr0075062	-0.391195	class1
MH	FBtr0075077	-0.711694	class1
MH	FBtr0075122	-0.180635	class1
MH	FBtr0075125	0.477527	class1
MH	FBtr0075126	-1.13418	class1
MH	FBtr0075133	-0.0839409	class1
MH	FBtr0075136	0.517366	class1
MH	FBtr0075140	-0.318758	class1
MH	FBtr0075142	-0.139379	class1
MH	FBtr0075144	0.185061	class1
MH	FBtr0075161	0.216235	class1
MH	FBtr0075186	-0.309349	class1
MH	FBtr0075215	0.260748	class1
MH	FBtr0075220	-0.233695	class1
MH	FBtr0075232	-0.329734	class1
MH	FBtr0075239	0.236466	class1
MH	FBtr0075241	-0.514754	class1
MH	FBtr0075279	0.460684	class1
MH	FBtr0075293	-0.182527	class1
MH	FBtr0075311	-0.254436	class1
MH	FBtr0075337	-0.0859329	class1
MH	FBtr0075369	-1.07368	class1
MH	FBtr0075408	-0.298416	class1
MH	FBtr0075428	-0.507894	class1
MH	FBtr0075437	0.270367	class1
MH	FBtr0075457	0.195289	class1
MH	FBtr0075459	-0.0284141	class1
MH	FBtr0075497	0.0863685	class1
MH	FBtr0075505	-0.486448	class1
MH	FBtr0075512	0.227145	class1
MH	FBtr0075579	-0.0520978	class1
MH	FBtr0075604	0.23167	class1
MH	FBtr0075607	-0.125826	class1
MH	FBtr0075641	-0.579132	class1
MH	FBtr0075651	0.524953	class1
MH	FBtr0075671	-0.380008	class1
MH	FBtr0075679	-0.434178	class1
MH	FBtr0075715	0.257752	class1
MH	FBtr0075724	-0.360671	class1
MH	FBtr0075753	0.854451	class1
MH	FBtr0075756	-0.179587	class1
MH	FBtr0075781	-0.0835305	class1
MH	FBtr0075812	-0.382509	class1
MH	FBtr0075813	0.071377	class1
MH	FBtr0075818	0.363974	class1
MH	FBtr0075820	-0.576291	class1
MH	FBtr0075898	0.479819	class1
MH	FBtr0075913	-0.223732	class1
MH	FBtr0075929	0.0679178	class1
MH	FBtr0075957	-0.244547	class1
MH	FBtr0075976	0.0939362	class1
MH	FBtr0075980	0.0770316	class1
MH	FBtr0075982	0.0251188	class1
MH	FBtr0075997	-0.214522	class1
MH	FBtr0075998	-0.210298	class1
MH	FBtr0076000	-0.321055	class1
MH	FBtr0076028	1.12617	class1
MH	FBtr0076061	0.591526	class1
MH	FBtr0076080	-0.582787	class1
MH	FBtr0076093	0.0633459	class1
MH	FBtr0076106	0.280074	class1
MH	FBtr0076108	-0.0116737	class1
MH	FBtr0076114	-0.200116	class1
MH	FBtr0076181	-0.281385	class1
MH	FBtr0076186	-0.180905	class1
MH	FBtr0076203	0.268873	class1
MH	FBtr0076207	0.153179	class1
MH	FBtr0076236	0.184266	class1
MH	FBtr0076241	0.413652	class1
MH	FBtr0076242	-0.866379	class1
MH	FBtr0076255	-0.327907	class1
MH	FBtr0076269	-0.310616	class1
MH	FBtr0076277	0.0133124	class1
MH	FBtr0076360	-0.216196	class1
MH	FBtr0076382	0.467198	class1
MH	FBtr0076383	-0.348894	class1
MH	FBtr0076403	0.0510521	class1
MH	FBtr0076413	0.0673781	class1
MH	FBtr0076416	0.29293	class1
MH	FBtr0076429	-1.59215	class1
MH	FBtr0076461	-0.0433163	class1
MH	FBtr0076468	0.00845803	class1
MH	FBtr0076469	-0.627315	class1
MH	FBtr0076494	-0.234879	class1
MH	FBtr0076520	-0.304268	class1
MH	FBtr0076524	0.488778	class1
MH	FBtr0076530	0.0647085	class1
MH	FBtr0076553	-0.0884973	class1
MH	FBtr0076556	-0.576642	class1
MH	FBtr0076583	-0.211611	class1
MH	FBtr0076598	0.382774	class1
MH	FBtr0076602	-0.109497	class1
MH	FBtr0076606	1.08731	class1
MH	FBtr0076621	0.028302	class1
MH	FBtr0076624	-0.355414	class1
MH	FBtr0076656	-0.141733	class1
MH	FBtr0076690	-0.429199	class1
MH	FBtr0076710	0.00862326	class1
MH	FBtr0076745	-0.181742	class1
MH	FBtr0076756	2.37888	class1
MH	FBtr0076770	-0.00713883	class1
MH	FBtr0076780	0.946505	class1
MH	FBtr0076793	0.051036	class1
MH	FBtr0076795	0.098114	class1
MH	FBtr0076811	-0.0456784	class1
MH	FBtr0076821	-0.084596	class1
MH	FBtr0076848	-0.4495	class1
MH	FBtr0076851	0.0434316	class1
MH	FBtr0076868	4.24152	class1
MH	FBtr0076878	0.13218	class1
MH	FBtr0076888	-0.152446	class1
MH	FBtr0076890	0.0363805	class1
MH	FBtr0076896	0.0575951	class1
MH	FBtr0076934	0.153014	class1
MH	FBtr0076945	0.552914	class1
MH	FBtr0076949	-0.734718	class1
MH	FBtr0077007	-0.447078	class1
MH	FBtr0077010	-0.207877	class1
MH	FBtr0077012	-0.129277	class1
MH	FBtr0077014	0.295816	class1
MH	FBtr0077017	-0.153823	class1
MH	FBtr0077037	0.142274	class1
MH	FBtr0077049	0.99201	class1
MH	FBtr0077065	-0.337192	class1
MH	FBtr0077095	0.748426	class1
MH	FBtr0077100	0.439775	class1
MH	FBtr0077112	0.218424	class1
MH	FBtr0077116	-0.198085	class1
MH	FBtr0077117	-0.658618	class1
MH	FBtr0077157	0.0348888	class1
MH	FBtr0077167	0.140395	class1
MH	FBtr0077226	0.611542	class1
MH	FBtr0077227	0.107871	class1
MH	FBtr0077268	-0.154744	class1
MH	FBtr0077324	-0.154517	class1
MH	FBtr0077360	-0.351273	class1
MH	FBtr0077367	0.424506	class1
MH	FBtr0077383	-1.07045	class1
MH	FBtr0077384	-0.0983175	class1
MH	FBtr0077387	0.394332	class1
MH	FBtr0077391	-0.357132	class1
MH	FBtr0077394	0.374708	class1
MH	FBtr0077408	-0.0807949	class1
MH	FBtr0077412	0.0248006	class1
MH	FBtr0077418	-0.335986	class1
MH	FBtr0077425	-0.159375	class1
MH	FBtr0077431	-0.161737	class1
MH	FBtr0077432	-0.197224	class1
MH	FBtr0077439	0.107455	class1
MH	FBtr0077459	-0.512334	class1
MH	FBtr0077460	0.24354	class1
MH	FBtr0077465	-0.261519	class1
MH	FBtr0077504	0.0949614	class1
MH	FBtr0077537	-0.17921	class1
MH	FBtr0077543	-0.321493	class1
MH	FBtr0077568	-0.711891	class1
MH	FBtr0077576	-0.456222	class1
MH	FBtr0077583	-1.89809	class1
MH	FBtr0077584	-0.929568	class1
MH	FBtr0077629	-0.184138	class1
MH	FBtr0077643	0.558305	class1
MH	FBtr0077662	0.0521423	class1
MH	FBtr0077666	0.40426	class1
MH	FBtr0077670	-0.814748	class1
MH	FBtr0077671	0.951022	class1
MH	FBtr0077685	0.198078	class1
MH	FBtr0077686	-0.278147	class1
MH	FBtr0077726	-0.531224	class1
MH	FBtr0077731	-0.130052	class1
MH	FBtr0077736	-3.55993	class1
MH	FBtr0077744	0.318985	class1
MH	FBtr0077767	-0.500471	class1
MH	FBtr0077782	0.413264	class1
MH	FBtr0077799	0.276504	class1
MH	FBtr0077813	-0.0486391	class1
MH	FBtr0077822	0.0622238	class1
MH	FBtr0077831	0.185811	class1
MH	FBtr0077836	0.883333	class1
MH	FBtr0077840	0.182646	class1
MH	FBtr0077844	0.125755	class1
MH	FBtr0077885	-0.120723	class1
MH	FBtr0077905	-0.120236	class1
MH	FBtr0077911	-0.17578	class1
MH	FBtr0077921	0.630678	class1
MH	FBtr0077949	-0.265262	class1
MH	FBtr0077953	-0.25422	class1
MH	FBtr0077956	0.0160805	class1
MH	FBtr0077966	0.415518	class1
MH	FBtr0077968	-0.666164	class1
MH	FBtr0077989	-0.177293	class1
MH	FBtr0078014	0.0689529	class1
MH	FBtr0078041	0.22481	class1
MH	FBtr0078045	-0.29262	class1
MH	FBtr0078050	-0.237428	class1
MH	FBtr0078055	0.360934	class1
MH	FBtr0078060	0.0228359	class1
MH	FBtr0078062	0.662294	class1
MH	FBtr0078066	0.0777508	class1
MH	FBtr0078068	-0.0696234	class1
MH	FBtr0078069	0.459423	class1
MH	FBtr0078070	0.691951	class1
MH	FBtr0078071	-0.383114	class1
MH	FBtr0078079	0.475413	class1
MH	FBtr0078087	-0.482973	class1
MH	FBtr0078100	-0.45056	class1
MH	FBtr0078122	0.596774	class1
MH	FBtr0078153	-0.0365904	class1
MH	FBtr0078156	-0.00229775	class1
MH	FBtr0078195	0.191213	class1
MH	FBtr0078198	-0.111527	class1
MH	FBtr0078212	-0.117222	class1
MH	FBtr0078235	0.405001	class1
MH	FBtr0078238	0.353713	class1
MH	FBtr0078247	0.7495	class1
MH	FBtr0078256	0.263944	class1
MH	FBtr0078263	0.552195	class1
MH	FBtr0078267	0.100983	class1
MH	FBtr0078268	-1.43248	class1
MH	FBtr0078277	-0.258725	class1
MH	FBtr0078280	-0.00239004	class1
MH	FBtr0078287	0.579246	class1
MH	FBtr0078289	0.452341	class1
MH	FBtr0078305	-0.362776	class1
MH	FBtr0078309	0.17073	class1
MH	FBtr0078311	-0.141214	class1
MH	FBtr0078327	0.472185	class1
MH	FBtr0078387	0.653844	class1
MH	FBtr0078389	0.345256	class1
MH	FBtr0078397	0.532604	class1
MH	FBtr0078399	-0.0953811	class1
MH	FBtr0078404	0.0679219	class1
MH	FBtr0078407	0.684178	class1
MH	FBtr0078413	-0.398193	class1
MH	FBtr0078448	0.194808	class1
MH	FBtr0078450	0.295425	class1
MH	FBtr0078471	-0.075113	class1
MH	FBtr0078486	0.591157	class1
MH	FBtr0078508	-0.494088	class1
MH	FBtr0078510	-0.0130685	class1
MH	FBtr0078512	0.43304	class1
MH	FBtr0078571	-0.0284783	class1
MH	FBtr0078642	-0.235165	class1
MH	FBtr0078647	-0.105002	class1
MH	FBtr0078665	-0.69005	class1
MH	FBtr0078669	0.43072	class1
MH	FBtr0078677	0.264737	class1
MH	FBtr0078678	0.106748	class1
MH	FBtr0078713	-0.0714531	class1
MH	FBtr0078716	-0.148043	class1
MH	FBtr0078723	0.0803543	class1
MH	FBtr0078736	0.0103476	class1
MH	FBtr0078740	0.255651	class1
MH	FBtr0078752	0.261805	class1
MH	FBtr0078754	-0.173447	class1
MH	FBtr0078756	1.23011	class1
MH	FBtr0078761	-0.116513	class1
MH	FBtr0078768	-0.534167	class1
MH	FBtr0078770	0.564726	class1
MH	FBtr0078777	0.0860897	class1
MH	FBtr0078821	-0.576998	class1
MH	FBtr0078828	-0.157832	class1
MH	FBtr0078836	-0.183551	class1
MH	FBtr0078844	0.0369501	class1
MH	FBtr0078856	0.0177831	class1
MH	FBtr0078868	1.4346	class1
MH	FBtr0078875	-0.186208	class1
MH	FBtr0078894	-0.0558861	class1
MH	FBtr0078925	-0.273978	class1
MH	FBtr0078926	-0.628912	class1
MH	FBtr0078949	-0.232327	class1
MH	FBtr0078958	-0.220263	class1
MH	FBtr0078959	-0.293093	class1
MH	FBtr0078961	-0.0393113	class1
MH	FBtr0078985	0.232446	class1
MH	FBtr0078991	-0.539882	class1
MH	FBtr0079004	-0.225745	class1
MH	FBtr0079036	-0.0314204	class1
MH	FBtr0079037	0.288528	class1
MH	FBtr0079053	-0.648482	class1
MH	FBtr0079069	0.848457	class1
MH	FBtr0079071	1.5609	class1
MH	FBtr0079077	-0.070154	class1
MH	FBtr0079082	-0.00506264	class1
MH	FBtr0079093	0.0974073	class1
MH	FBtr0079098	-0.440939	class1
MH	FBtr0079114	-0.333809	class1
MH	FBtr0079126	-0.74578	class1
MH	FBtr0079128	-0.00681865	class1
MH	FBtr0079135	-0.250709	class1
MH	FBtr0079144	0.0333642	class1
MH	FBtr0079158	0.383175	class1
MH	FBtr0079160	1.27735	class1
MH	FBtr0079187	-0.0733055	class1
MH	FBtr0079211	-0.0580368	class1
MH	FBtr0079223	-0.316635	class1
MH	FBtr0079231	0.127352	class1
MH	FBtr0079249	0.0795982	class1
MH	FBtr0079253	-0.207315	class1
MH	FBtr0079257	0.878879	class1
MH	FBtr0079262	-0.0676597	class1
MH	FBtr0079267	-0.157438	class1
MH	FBtr0079268	0.388362	class1
MH	FBtr0079287	-0.388829	class1
MH	FBtr0079291	-0.0466354	class1
MH	FBtr0079303	0.307727	class1
MH	FBtr0079310	-0.737334	class1
MH	FBtr0079342	-0.736108	class1
MH	FBtr0079389	1.17073	class1
MH	FBtr0079423	-0.804172	class1
MH	FBtr0079426	-0.223454	class1
MH	FBtr0079436	-0.0612145	class1
MH	FBtr0079472	-0.014649	class1
MH	FBtr0079477	0.0699023	class1
MH	FBtr0079488	-0.0861522	class1
MH	FBtr0079490	0.2908	class1
MH	FBtr0079493	-0.109787	class1
MH	FBtr0079523	-0.121229	class1
MH	FBtr0079543	-0.0837535	class1
MH	FBtr0079551	-0.575869	class1
MH	FBtr0079564	-0.485138	class1
MH	FBtr0079574	-0.192762	class1
MH	FBtr0079581	-0.322852	class1
MH	FBtr0079608	-0.475761	class1
MH	FBtr0079613	-0.266296	class1
MH	FBtr0079614	-0.218028	class1
MH	FBtr0079616	-0.0596824	class1
MH	FBtr0079703	-0.113831	class1
MH	FBtr0079708	0.745578	class1
MH	FBtr0079711	-0.655081	class1
MH	FBtr0079783	-0.871993	class1
MH	FBtr0079809	-0.130138	class1
MH	FBtr0079851	-0.676569	class1
MH	FBtr0079865	0.0252794	class1
MH	FBtr0079879	-0.271388	class1
MH	FBtr0079883	-0.0116107	class1
MH	FBtr0079901	0.161424	class1
MH	FBtr0079932	0.137802	class1
MH	FBtr0079953	-0.214437	class1
MH	FBtr0079978	-0.394429	class1
MH	FBtr0079983	0.600853	class1
MH	FBtr0079985	-0.0683363	class1
MH	FBtr0079986	-0.575591	class1
MH	FBtr0079987	-0.230761	class1
MH	FBtr0079992	-0.470338	class1
MH	FBtr0079993	0.0596945	class1
MH	FBtr0079999	0.346506	class1
MH	FBtr0080002	-0.31704	class1
MH	FBtr0080019	-0.488197	class1
MH	FBtr0080027	-0.0929306	class1
MH	FBtr0080030	-0.250537	class1
MH	FBtr0080043	-0.287236	class1
MH	FBtr0080046	-0.011606	class1
MH	FBtr0080061	-0.0590732	class1
MH	FBtr0080065	-0.394164	class1
MH	FBtr0080074	-0.0123694	class1
MH	FBtr0080095	-1.28077	class1
MH	FBtr0080114	-0.132001	class1
MH	FBtr0080117	-0.159692	class1
MH	FBtr0080121	0.212355	class1
MH	FBtr0080135	-0.605924	class1
MH	FBtr0080161	0.594303	class1
MH	FBtr0080181	-0.162381	class1
MH	FBtr0080189	-0.0583764	class1
MH	FBtr0080228	-0.0730025	class1
MH	FBtr0080231	0.413136	class1
MH	FBtr0080235	-0.0176692	class1
MH	FBtr0080259	-0.240416	class1
MH	FBtr0080274	0.0984996	class1
MH	FBtr0080291	-0.0391469	class1
MH	FBtr0080308	0.155424	class1
MH	FBtr0080309	-0.0973467	class1
MH	FBtr0080312	0.137694	class1
MH	FBtr0080332	0.0360293	class1
MH	FBtr0080344	0.0682814	class1
MH	FBtr0080388	0.467432	class1
MH	FBtr0080389	0.41346	class1
MH	FBtr0080406	-3.98393	class1
MH	FBtr0080427	0.281282	class1
MH	FBtr0080428	-0.474519	class1
MH	FBtr0080436	0.477578	class1
MH	FBtr0080439	0.0618722	class1
MH	FBtr0080445	-0.0394314	class1
MH	FBtr0080449	-0.217822	class1
MH	FBtr0080460	-0.380367	class1
MH	FBtr0080468	0.160157	class1
MH	FBtr0080470	-0.0128836	class1
MH	FBtr0080471	0.68071	class1
MH	FBtr0080484	-0.434775	class1
MH	FBtr0080489	0.185525	class1
MH	FBtr0080490	0.143906	class1
MH	FBtr0080498	0.468048	class1
MH	FBtr0080511	0.283916	class1
MH	FBtr0080519	-0.309705	class1
MH	FBtr0080527	-0.735141	class1
MH	FBtr0080534	0.0825922	class1
MH	FBtr0080537	-0.0392623	class1
MH	FBtr0080541	0.270745	class1
MH	FBtr0080546	-0.10119	class1
MH	FBtr0080566	0.0353121	class1
MH	FBtr0080580	-0.0675475	class1
MH	FBtr0080602	0.297836	class1
MH	FBtr0080610	-1.36826	class1
MH	FBtr0080618	0.393422	class1
MH	FBtr0080624	-0.00838611	class1
MH	FBtr0080676	0.462093	class1
MH	FBtr0080685	-0.23832	class1
MH	FBtr0080702	-0.427027	class1
MH	FBtr0080709	0.114296	class1
MH	FBtr0080718	-0.158602	class1
MH	FBtr0080722	-0.267182	class1
MH	FBtr0080723	-0.289097	class1
MH	FBtr0080727	0.324323	class1
MH	FBtr0080801	-0.97687	class1
MH	FBtr0080831	-0.32179	class1
MH	FBtr0080838	0.123217	class1
MH	FBtr0080852	-0.208247	class1
MH	FBtr0080866	-0.306693	class1
MH	FBtr0080880	-0.295059	class1
MH	FBtr0080883	0.271143	class1
MH	FBtr0080908	0.272704	class1
MH	FBtr0080911	0.782899	class1
MH	FBtr0080947	-0.557936	class1
MH	FBtr0080971	0.224754	class1
MH	FBtr0080983	-0.483869	class1
MH	FBtr0080989	-0.485029	class1
MH	FBtr0080994	-0.611052	class1
MH	FBtr0081035	0.0561073	class1
MH	FBtr0081061	-0.159182	class1
MH	FBtr0081062	-0.419234	class1
MH	FBtr0081098	-0.321031	class1
MH	FBtr0081102	-0.627436	class1
MH	FBtr0081122	-0.719727	class1
MH	FBtr0081128	-0.121715	class1
MH	FBtr0081148	0.145875	class1
MH	FBtr0081155	-0.0259214	class1
MH	FBtr0081162	-0.168537	class1
MH	FBtr0081174	-0.283663	class1
MH	FBtr0081177	0.683999	class1
MH	FBtr0081187	0.409688	class1
MH	FBtr0081193	-0.574427	class1
MH	FBtr0081194	0.300207	class1
MH	FBtr0081247	0.128529	class1
MH	FBtr0081248	0.00265913	class1
MH	FBtr0081249	0.179976	class1
MH	FBtr0081257	-0.132458	class1
MH	FBtr0081259	-0.615942	class1
MH	FBtr0081267	-0.496141	class1
MH	FBtr0081287	0.276435	class1
MH	FBtr0081288	-0.796029	class1
MH	FBtr0081318	0.110783	class1
MH	FBtr0081340	0.0935268	class1
MH	FBtr0081341	0.674713	class1
MH	FBtr0081358	-0.502932	class1
MH	FBtr0081371	-0.507424	class1
MH	FBtr0081399	0.169782	class1
MH	FBtr0081459	-0.219227	class1
MH	FBtr0081460	-0.811747	class1
MH	FBtr0081465	-1.07678	class1
MH	FBtr0081479	-0.531806	class1
MH	FBtr0081485	-2.199	class1
MH	FBtr0081512	0.0386317	class1
MH	FBtr0081538	0.173148	class1
MH	FBtr0081541	0.0840921	class1
MH	FBtr0081611	0.0256173	class1
MH	FBtr0081621	0.102339	class1
MH	FBtr0081657	-0.308513	class1
MH	FBtr0081719	0.199805	class1
MH	FBtr0081720	0.244438	class1
MH	FBtr0081728	0.510291	class1
MH	FBtr0081763	-0.0444666	class1
MH	FBtr0081765	0.454123	class1
MH	FBtr0081780	0.159027	class1
MH	FBtr0081789	-0.270399	class1
MH	FBtr0081806	-0.489544	class1
MH	FBtr0081816	-0.561423	class1
MH	FBtr0081820	0.180635	class1
MH	FBtr0081823	0.97003	class1
MH	FBtr0081843	-0.387851	class1
MH	FBtr0081866	0.378459	class1
MH	FBtr0081867	0.0694805	class1
MH	FBtr0081879	0.295895	class1
MH	FBtr0081880	-0.283136	class1
MH	FBtr0081892	-0.389304	class1
MH	FBtr0081897	-0.426929	class1
MH	FBtr0081901	0.312393	class1
MH	FBtr0081915	-0.135382	class1
MH	FBtr0081922	-0.0308671	class1
MH	FBtr0081931	0.0633528	class1
MH	FBtr0081958	0.187877	class1
MH	FBtr0081959	0.23339	class1
MH	FBtr0081965	0.00536553	class1
MH	FBtr0081981	0.0908145	class1
MH	FBtr0082005	0.0254171	class1
MH	FBtr0082011	-0.357811	class1
MH	FBtr0082017	0.261277	class1
MH	FBtr0082052	0.606332	class1
MH	FBtr0082055	-0.105689	class1
MH	FBtr0082063	-0.0539561	class1
MH	FBtr0082073	-0.107036	class1
MH	FBtr0082075	0.311962	class1
MH	FBtr0082077	0.801097	class1
MH	FBtr0082102	0.0839154	class1
MH	FBtr0082114	-0.465528	class1
MH	FBtr0082130	-0.220597	class1
MH	FBtr0082179	-0.237307	class1
MH	FBtr0082204	-0.202472	class1
MH	FBtr0082230	0.664173	class1
MH	FBtr0082240	-0.127929	class1
MH	FBtr0082246	0.00894644	class1
MH	FBtr0082289	-0.975216	class1
MH	FBtr0082297	-0.844132	class1
MH	FBtr0082329	-0.183783	class1
MH	FBtr0082353	-0.129972	class1
MH	FBtr0082365	0.216208	class1
MH	FBtr0082371	-0.51737	class1
MH	FBtr0082387	0.125942	class1
MH	FBtr0082413	-0.0635022	class1
MH	FBtr0082458	0.0107405	class1
MH	FBtr0082470	-0.0841716	class1
MH	FBtr0082508	0.108628	class1
MH	FBtr0082529	-0.390984	class1
MH	FBtr0082548	0.69349	class1
MH	FBtr0082555	0.0463104	class1
MH	FBtr0082563	-0.0270487	class1
MH	FBtr0082570	3.02173	class1
MH	FBtr0082681	-0.431072	class1
MH	FBtr0082684	-0.677741	class1
MH	FBtr0082704	0.176314	class1
MH	FBtr0082717	0.313209	class1
MH	FBtr0082747	-0.422983	class1
MH	FBtr0082763	0.147549	class1
MH	FBtr0082778	-0.204561	class1
MH	FBtr0082780	0.159039	class1
MH	FBtr0082797	-0.233702	class1
MH	FBtr0082817	-0.140918	class1
MH	FBtr0082828	-0.0374696	class1
MH	FBtr0082880	0.179287	class1
MH	FBtr0082929	0.244551	class1
MH	FBtr0082975	0.247065	class1
MH	FBtr0083005	-0.701397	class1
MH	FBtr0083051	0.00415802	class1
MH	FBtr0083089	-0.333148	class1
MH	FBtr0083094	0.092328	class1
MH	FBtr0083099	0.23916	class1
MH	FBtr0083109	-0.157091	class1
MH	FBtr0083117	-0.159256	class1
MH	FBtr0083121	-0.2662	class1
MH	FBtr0083123	-0.24259	class1
MH	FBtr0083136	0.181982	class1
MH	FBtr0083138	0.0352228	class1
MH	FBtr0083212	0.0537589	class1
MH	FBtr0083228	0.0215206	class1
MH	FBtr0083251	-0.2515	class1
MH	FBtr0083255	-0.230934	class1
MH	FBtr0083257	0.155269	class1
MH	FBtr0083266	-0.637421	class1
MH	FBtr0083281	-0.768794	class1
MH	FBtr0083291	0.407291	class1
MH	FBtr0083308	0.0700949	class1
MH	FBtr0083316	-0.4639	class1
MH	FBtr0083324	-0.0533063	class1
MH	FBtr0083325	1.12701	class1
MH	FBtr0083353	-0.53919	class1
MH	FBtr0083376	0.409627	class1
MH	FBtr0083391	-0.134527	class1
MH	FBtr0083392	-0.281834	class1
MH	FBtr0083393	-0.352847	class1
MH	FBtr0083408	0.872511	class1
MH	FBtr0083453	0.32773	class1
MH	FBtr0083462	-0.642478	class1
MH	FBtr0083504	-0.183165	class1
MH	FBtr0083505	0.19747	class1
MH	FBtr0083557	0.579139	class1
MH	FBtr0083560	0.0859208	class1
MH	FBtr0083564	0.0384242	class1
MH	FBtr0083606	-0.591774	class1
MH	FBtr0083623	-0.0682948	class1
MH	FBtr0083637	0.112942	class1
MH	FBtr0083668	-0.790652	class1
MH	FBtr0083671	1.15502	class1
MH	FBtr0083718	-0.474654	class1
MH	FBtr0083723	-0.156443	class1
MH	FBtr0083729	0.109248	class1
MH	FBtr0083739	0.726201	class1
MH	FBtr0083777	-0.707687	class1
MH	FBtr0083786	-0.250369	class1
MH	FBtr0083816	-0.251061	class1
MH	FBtr0083821	0.0248483	class1
MH	FBtr0083838	-1.06463	class1
MH	FBtr0083850	-0.403711	class1
MH	FBtr0083852	-0.259818	class1
MH	FBtr0083857	0.695128	class1
MH	FBtr0083882	-0.319887	class1
MH	FBtr0083937	-0.136882	class1
MH	FBtr0083940	-0.46388	class1
MH	FBtr0083949	-0.262231	class1
MH	FBtr0083986	-0.296233	class1
MH	FBtr0084002	0.106656	class1
MH	FBtr0084009	-0.419912	class1
MH	FBtr0084010	-0.307503	class1
MH	FBtr0084017	-0.360571	class1
MH	FBtr0084020	0.102953	class1
MH	FBtr0084035	0.239708	class1
MH	FBtr0084036	0.0177195	class1
MH	FBtr0084044	-0.119913	class1
MH	FBtr0084107	-1.30167	class1
MH	FBtr0084121	-0.756306	class1
MH	FBtr0084137	-0.338202	class1
MH	FBtr0084157	0.235451	class1
MH	FBtr0084164	-0.140257	class1
MH	FBtr0084201	-0.142691	class1
MH	FBtr0084260	-0.871387	class1
MH	FBtr0084264	0.322538	class1
MH	FBtr0084282	-0.396043	class1
MH	FBtr0084285	0.0884559	class1
MH	FBtr0084289	-0.64065	class1
MH	FBtr0084294	-0.489151	class1
MH	FBtr0084312	0.150062	class1
MH	FBtr0084334	-0.251836	class1
MH	FBtr0084347	-0.0526976	class1
MH	FBtr0084357	0.655574	class1
MH	FBtr0084368	-0.0288921	class1
MH	FBtr0084384	0.249965	class1
MH	FBtr0084406	0.690955	class1
MH	FBtr0084407	0.256841	class1
MH	FBtr0084450	-0.384528	class1
MH	FBtr0084460	0.327646	class1
MH	FBtr0084463	0.790138	class1
MH	FBtr0084467	-0.109787	class1
MH	FBtr0084476	0.647767	class1
MH	FBtr0084491	0.205928	class1
MH	FBtr0084501	-0.330999	class1
MH	FBtr0084506	0.000506178	class1
MH	FBtr0084520	-0.182762	class1
MH	FBtr0084527	-0.171862	class1
MH	FBtr0084529	-2.15818	class1
MH	FBtr0084533	-0.295414	class1
MH	FBtr0084536	0.348474	class1
MH	FBtr0084546	0.687515	class1
MH	FBtr0084590	0.586224	class1
MH	FBtr0084591	0.0294194	class1
MH	FBtr0084604	0.427935	class1
MH	FBtr0084639	-0.342657	class1
MH	FBtr0084645	0.259093	class1
MH	FBtr0084670	-0.628141	class1
MH	FBtr0084681	-0.139048	class1
MH	FBtr0084715	-0.445477	class1
MH	FBtr0084736	0.615411	class1
MH	FBtr0084743	-0.0876177	class1
MH	FBtr0084756	-0.0223011	class1
MH	FBtr0084783	0.139512	class1
MH	FBtr0084786	-0.155941	class1
MH	FBtr0084791	0.0997301	class1
MH	FBtr0084794	0.26461	class1
MH	FBtr0084796	-0.271666	class1
MH	FBtr0084801	0.0472657	class1
MH	FBtr0084802	-0.137105	class1
MH	FBtr0084837	0.289686	class1
MH	FBtr0084874	0.0151699	class1
MH	FBtr0084883	0.205009	class1
MH	FBtr0084893	-0.342804	class1
MH	FBtr0084949	-0.206394	class1
MH	FBtr0084967	-0.19509	class1
MH	FBtr0084985	0.0342255	class1
MH	FBtr0085015	0.0138954	class1
MH	FBtr0085039	0.0857807	class1
MH	FBtr0085064	0.344878	class1
MH	FBtr0085093	0.158982	class1
MH	FBtr0085105	-0.412817	class1
MH	FBtr0085108	-1.65239	class1
MH	FBtr0085122	-1.07095	class1
MH	FBtr0085137	-0.17083	class1
MH	FBtr0085159	-0.264062	class1
MH	FBtr0085179	-0.536177	class1
MH	FBtr0085200	0.132321	class1
MH	FBtr0085224	0.312321	class1
MH	FBtr0085249	-0.343236	class1
MH	FBtr0085270	-0.0484344	class1
MH	FBtr0085304	-0.347438	class1
MH	FBtr0085308	0.323274	class1
MH	FBtr0085310	0.173569	class1
MH	FBtr0085319	-0.246784	class1
MH	FBtr0085344	0.519208	class1
MH	FBtr0085351	-0.330969	class1
MH	FBtr0085356	0.572746	class1
MH	FBtr0085359	-0.103242	class1
MH	FBtr0085410	0.0221168	class1
MH	FBtr0085412	-0.305947	class1
MH	FBtr0085417	0.060952	class1
MH	FBtr0085419	-0.180345	class1
MH	FBtr0085432	0.0415518	class1
MH	FBtr0085441	-0.738801	class1
MH	FBtr0085477	-0.0184721	class1
MH	FBtr0085484	0.179176	class1
MH	FBtr0085488	-0.228773	class1
MH	FBtr0085503	-0.712659	class1
MH	FBtr0085513	-0.0218122	class1
MH	FBtr0085551	-0.358868	class1
MH	FBtr0085621	1.57237	class1
MH	FBtr0085629	0.103761	class1
MH	FBtr0085650	-0.559949	class1
MH	FBtr0085673	-0.668123	class1
MH	FBtr0085679	-0.219296	class1
MH	FBtr0085691	-0.388784	class1
MH	FBtr0085733	0.404	class1
MH	FBtr0085753	-0.320453	class1
MH	FBtr0085788	-0.124739	class1
MH	FBtr0085808	0.106994	class1
MH	FBtr0085815	0.26896	class1
MH	FBtr0085836	-0.156425	class1
MH	FBtr0085842	0.110962	class1
MH	FBtr0085852	-0.714192	class1
MH	FBtr0085863	0.233256	class1
MH	FBtr0085877	0.125041	class1
MH	FBtr0085915	0.862108	class1
MH	FBtr0085941	0.890947	class1
MH	FBtr0085955	0.428918	class1
MH	FBtr0085974	-0.0310711	class1
MH	FBtr0085991	0.172036	class1
MH	FBtr0085992	0.298546	class1
MH	FBtr0086000	-0.120559	class1
MH	FBtr0086003	-0.16704	class1
MH	FBtr0086072	-0.42611	class1
MH	FBtr0086076	-0.747652	class1
MH	FBtr0086082	0.307849	class1
MH	FBtr0086084	0.825161	class1
MH	FBtr0086091	0.0509424	class1
MH	FBtr0086094	0.387667	class1
MH	FBtr0086135	-0.248578	class1
MH	FBtr0086140	-0.315189	class1
MH	FBtr0086185	-0.351411	class1
MH	FBtr0086186	0.916441	class1
MH	FBtr0086231	-1.04054	class1
MH	FBtr0086235	-1.46942	class1
MH	FBtr0086236	0.0312247	class1
MH	FBtr0086238	0.58989	class1
MH	FBtr0086270	0.165536	class1
MH	FBtr0086292	-0.199054	class1
MH	FBtr0086309	-0.330952	class1
MH	FBtr0086461	0.296081	class1
MH	FBtr0086499	0.876586	class1
MH	FBtr0086500	-0.0236937	class1
MH	FBtr0086504	-0.231228	class1
MH	FBtr0086516	0.792924	class1
MH	FBtr0086551	0.169409	class1
MH	FBtr0086563	-0.527666	class1
MH	FBtr0086570	0.0053013	class1
MH	FBtr0086580	-0.115898	class1
MH	FBtr0086608	-0.457083	class1
MH	FBtr0086609	-0.0032855	class1
MH	FBtr0086613	-0.512509	class1
MH	FBtr0086617	-0.405249	class1
MH	FBtr0086632	-0.606811	class1
MH	FBtr0086636	-0.214411	class1
MH	FBtr0086652	0.138538	class1
MH	FBtr0086654	0.0125222	class1
MH	FBtr0086657	-0.0361988	class1
MH	FBtr0086666	0.752771	class1
MH	FBtr0086694	-0.0580276	class1
MH	FBtr0086734	0.331917	class1
MH	FBtr0086735	-0.307829	class1
MH	FBtr0086754	0.288153	class1
MH	FBtr0086773	-0.605625	class1
MH	FBtr0086783	0.320042	class1
MH	FBtr0086810	-0.446879	class1
MH	FBtr0086833	0.159745	class1
MH	FBtr0086840	0.0187322	class1
MH	FBtr0086895	-0.287792	class1
MH	FBtr0086900	-0.552786	class1
MH	FBtr0086938	-0.156708	class1
MH	FBtr0086946	0.349402	class1
MH	FBtr0086954	0.676727	class1
MH	FBtr0086974	0.292739	class1
MH	FBtr0086982	-0.472941	class1
MH	FBtr0087010	-0.106409	class1
MH	FBtr0087048	-0.438686	class1
MH	FBtr0087071	-0.293475	class1
MH	FBtr0087079	0.0719451	class1
MH	FBtr0087115	-0.302127	class1
MH	FBtr0087121	-0.630442	class1
MH	FBtr0087140	0.0737477	class1
MH	FBtr0087144	0.39975	class1
MH	FBtr0087185	0.16392	class1
MH	FBtr0087201	0.79708	class1
MH	FBtr0087209	-0.318707	class1
MH	FBtr0087233	-0.679527	class1
MH	FBtr0087236	-0.0915876	class1
MH	FBtr0087242	-0.285032	class1
MH	FBtr0087287	-0.0881075	class1
MH	FBtr0087298	0.050256	class1
MH	FBtr0087331	-0.23368	class1
MH	FBtr0087343	0.207839	class1
MH	FBtr0087387	-0.134387	class1
MH	FBtr0087391	0.22728	class1
MH	FBtr0087392	-0.632944	class1
MH	FBtr0087405	-0.0621	class1
MH	FBtr0087409	-0.193532	class1
MH	FBtr0087421	0.158636	class1
MH	FBtr0087476	-0.277518	class1
MH	FBtr0087485	0.0864596	class1
MH	FBtr0087501	3.10603	class1
MH	FBtr0087519	-0.711727	class1
MH	FBtr0087523	0.869816	class1
MH	FBtr0087530	0.524382	class1
MH	FBtr0087532	-0.0849232	class1
MH	FBtr0087538	0.110386	class1
MH	FBtr0087539	-0.0733509	class1
MH	FBtr0087561	-0.0115392	class1
MH	FBtr0087564	0.0104522	class1
MH	FBtr0087569	0.108841	class1
MH	FBtr0087574	0.276344	class1
MH	FBtr0087578	0.510483	class1
MH	FBtr0087594	-0.0125005	class1
MH	FBtr0087601	0.0181212	class1
MH	FBtr0087612	-0.184109	class1
MH	FBtr0087633	-0.796781	class1
MH	FBtr0087645	-0.615935	class1
MH	FBtr0087666	0.695376	class1
MH	FBtr0087686	-0.073568	class1
MH	FBtr0087699	-0.480526	class1
MH	FBtr0087740	0.0921203	class1
MH	FBtr0087760	0.0145857	class1
MH	FBtr0087785	0.606789	class1
MH	FBtr0087788	-0.406977	class1
MH	FBtr0087798	0.0753824	class1
MH	FBtr0087806	-0.187111	class1
MH	FBtr0087822	-0.332969	class1
MH	FBtr0087844	0.314366	class1
MH	FBtr0087855	0.103196	class1
MH	FBtr0087862	-0.537048	class1
MH	FBtr0087867	-0.517728	class1
MH	FBtr0087881	-0.236119	class1
MH	FBtr0087895	0.168447	class1
MH	FBtr0087897	-0.0815309	class1
MH	FBtr0087926	0.243051	class1
MH	FBtr0087927	-0.00200306	class1
MH	FBtr0087974	-0.154691	class1
MH	FBtr0087976	-0.0447507	class1
MH	FBtr0088014	1.93961	class1
MH	FBtr0088021	-0.28894	class1
MH	FBtr0088045	-0.392842	class1
MH	FBtr0088051	0.0300039	class1
MH	FBtr0088054	-0.363371	class1
MH	FBtr0088063	-0.134349	class1
MH	FBtr0088068	-0.652859	class1
MH	FBtr0088102	-3.63577	class1
MH	FBtr0088114	0.13783	class1
MH	FBtr0088146	0.532523	class1
MH	FBtr0088196	-0.252731	class1
MH	FBtr0088212	0.276715	class1
MH	FBtr0088218	0.391464	class1
MH	FBtr0088223	0.121719	class1
MH	FBtr0088249	0.649427	class1
MH	FBtr0088253	0.110668	class1
MH	FBtr0088257	-0.410991	class1
MH	FBtr0088333	-0.111949	class1
MH	FBtr0088360	-0.0670607	class1
MH	FBtr0088369	-0.194146	class1
MH	FBtr0088380	3.3285	class1
MH	FBtr0088385	-0.610049	class1
MH	FBtr0088387	-0.372932	class1
MH	FBtr0088399	-0.0606653	class1
MH	FBtr0088405	0.192251	class1
MH	FBtr0088409	-0.374642	class1
MH	FBtr0088423	0.151271	class1
MH	FBtr0088433	0.141363	class1
MH	FBtr0088440	-0.414569	class1
MH	FBtr0088451	0.247132	class1
MH	FBtr0088474	0.509644	class1
MH	FBtr0088477	0.184284	class1
MH	FBtr0088502	0.0934449	class1
MH	FBtr0088522	-0.0953403	class1
MH	FBtr0088524	0.0033869	class1
MH	FBtr0088558	-0.086761	class1
MH	FBtr0088560	1.2098	class1
MH	FBtr0088570	-0.0740989	class1
MH	FBtr0088624	-0.511045	class1
MH	FBtr0088630	0.0554868	class1
MH	FBtr0088662	-0.401012	class1
MH	FBtr0088665	-0.791369	class1
MH	FBtr0088671	-0.741089	class1
MH	FBtr0088678	0.186581	class1
MH	FBtr0088688	-0.665732	class1
MH	FBtr0088694	0.178416	class1
MH	FBtr0088710	-0.51196	class1
MH	FBtr0088730	-0.194911	class1
MH	FBtr0088784	-0.106309	class1
MH	FBtr0088806	-0.131039	class1
MH	FBtr0088811	0.374212	class1
MH	FBtr0088815	0.0329018	class1
MH	FBtr0088821	-0.151089	class1
MH	FBtr0088845	-0.271125	class1
MH	FBtr0088874	-0.253899	class1
MH	FBtr0088910	0.226484	class1
MH	FBtr0088922	5.3382	class1
MH	FBtr0088947	-0.00361036	class1
MH	FBtr0088954	-0.170262	class1
MH	FBtr0088955	-0.0499355	class1
MH	FBtr0088966	0.0561928	class1
MH	FBtr0089015	0.311319	class1
MH	FBtr0089023	-0.179664	class1
MH	FBtr0089024	0.49028	class1
MH	FBtr0089026	-0.408725	class1
MH	FBtr0089028	-0.241763	class1
MH	FBtr0089030	-0.162685	class1
MH	FBtr0089075	-0.6326	class1
MH	FBtr0089079	1.03868	class1
MH	FBtr0089084	0.0155484	class1
MH	FBtr0089096	0.192383	class1
MH	FBtr0089112	-0.0198472	class1
MH	FBtr0089122	0.742179	class1
MH	FBtr0089154	0.608443	class1
MH	FBtr0089188	0.300246	class1
MH	FBtr0089195	-1.40921	class1
MH	FBtr0089229	-0.140053	class1
MH	FBtr0089251	-0.482981	class1
MH	FBtr0089304	-0.00892415	class1
MH	FBtr0089327	1.04833	class1
MH	FBtr0089332	-0.0311462	class1
MH	FBtr0089338	0.602296	class1
MH	FBtr0089376	-0.83118	class1
MH	FBtr0089377	-0.245803	class1
MH	FBtr0089411	-0.200666	class1
MH	FBtr0089414	0.147315	class1
MH	FBtr0089480	0.40064	class1
MH	FBtr0089491	-0.157262	class1
MH	FBtr0089578	0.245461	class1
MH	FBtr0089581	-0.0258044	class1
MH	FBtr0089597	0.886314	class1
MH	FBtr0089617	-0.703092	class1
MH	FBtr0089623	-0.586799	class1
MH	FBtr0089624	-0.478921	class1
MH	FBtr0089649	-0.490131	class1
MH	FBtr0089655	0.268444	class1
MH	FBtr0089694	3.71636	class1
MH	FBtr0089713	-0.0614645	class1
MH	FBtr0089728	0.0103505	class1
MH	FBtr0089734	0.888818	class1
MH	FBtr0089786	-0.436469	class1
MH	FBtr0089855	-0.0519199	class1
MH	FBtr0089868	-0.152794	class1
MH	FBtr0089920	-0.055715	class1
MH	FBtr0089947	-0.514283	class1
MH	FBtr0089956	0.0615271	class1
MH	FBtr0089995	-0.650533	class1
MH	FBtr0091474	0.169546	class1
MH	FBtr0091512	0.188125	class1
MH	FBtr0091616	0.0362994	class1
MH	FBtr0091650	-0.209416	class1
MH	FBtr0100009	0.0799843	class1
MH	FBtr0100023	0.0262143	class1
MH	FBtr0100033	-0.0912119	class1
MH	FBtr0100132	0.265168	class1
MH	FBtr0100218	-0.526593	class1
MH	FBtr0100441	-0.478784	class1
MH	FBtr0100461	-0.635568	class1
MH	FBtr0100495	-0.677767	class1
MH	FBtr0100516	-0.0804874	class1
MH	FBtr0100543	0.086231	class1
MH	FBtr0100556	-0.0919125	class1
MH	FBtr0100598	-0.168017	class1
MH	FBtr0100677	-0.221664	class1
MH	FBtr0100833	-1.28057	class1
MH	FBtr0110783	-0.0114593	class1
MH	FBtr0110806	-0.451042	class1
MH	FBtr0110850	-0.348396	class1
MH	FBtr0110959	-0.0738581	class1
MH	FBtr0110961	-0.286571	class1
MH	FBtr0110983	0.663929	class1
MH	FBtr0111009	-0.798805	class1
MH	FBtr0111047	0.0266218	class1
MH	FBtr0111114	0.973737	class1
MH	FBtr0111118	0.539081	class1
MH	FBtr0111285	-0.0614862	class1
MH	FBtr0111291	0.194769	class1
MH	FBtr0112384	0.320834	class1
MH	FBtr0112614	1.69119	class1
MH	FBtr0112630	0.134411	class1
MH	FBtr0112642	-0.286222	class1
MH	FBtr0112717	-0.094593	class1
MH	FBtr0112744	-0.518997	class1
MH	FBtr0112775	-0.685446	class1
MH	FBtr0112777	-0.0973936	class1
MH	FBtr0112802	-0.0820779	class1
MH	FBtr0112830	0.180042	class1
MH	FBtr0112892	0.0922181	class1
MH	FBtr0112897	-0.494404	class1
MH	FBtr0112929	-0.185327	class1
MH	FBtr0112955	-0.426384	class1
MH	FBtr0112984	-0.180115	class1
MH	FBtr0112992	1.17376	class1
MH	FBtr0113000	-0.44546	class1
MH	FBtr0113028	-0.072146	class1
MH	FBtr0113033	0.0776282	class1
MH	FBtr0113070	0.0557679	class1
MH	FBtr0113084	-0.476936	class1
MH	FBtr0113118	0.451167	class1
MH	FBtr0113171	-0.18258	class1
MH	FBtr0113176	0.372183	class1
MH	FBtr0113179	-0.363704	class1
MH	FBtr0113183	-0.400615	class1
MH	FBtr0113203	-0.498904	class1
MH	FBtr0113210	0.190099	class1
MH	FBtr0113214	0.0569057	class1
MH	FBtr0113228	0.0589316	class1
MH	FBtr0113248	-0.0923373	class1
MH	FBtr0113297	-0.0989401	class1
MH	FBtr0113304	-0.0308856	class1
MH	FBtr0113310	0.00943177	class1
MH	FBtr0113316	-0.399564	class1
MH	FBtr0113322	-0.0401649	class1
MH	FBtr0113368	2.51143	class1
MH	FBtr0113377	1.5343	class1
MH	FBtr0113427	0.0427916	class1
MH	FBtr0113469	0.374149	class1
MH	FBtr0113746	0.527591	class1
MH	FBtr0113781	-0.0518085	class1
MH	FBtr0113829	0.632123	class1
MH	FBtr0114453	0.0493034	class1
MH	FBtr0114487	-0.81775	class1
MH	FBtr0114509	0.0836414	class1
MH	FBtr0114558	0.443223	class1
MH	FBtr0114575	-0.569295	class1
MH	FBtr0114586	-0.00534597	class1
MH	FBtr0114589	0.11367	class1
MH	FBtr0114622	0.608728	class1
MH	FBtr0273183	-0.418305	class1
MH	FBtr0273208	0.561258	class1
MH	FBtr0273245	-0.123463	class1
MH	FBtr0273273	-0.0867377	class1
MH	FBtr0273278	-0.818279	class1
MH	FBtr0273282	0.163373	class1
MH	FBtr0273305	0.282594	class1
MH	FBtr0273323	0.199016	class1
MH	FBtr0273336	0.174109	class1
MH	FBtr0273339	-0.448208	class1
MH	FBtr0273391	0.0636157	class1
MH	FBtr0273407	-0.177569	class1
MH	FBtr0289981	-0.143552	class1
MH	FBtr0290050	-0.239913	class1
MH	FBtr0290059	-0.141735	class1
MH	FBtr0290120	0.0131254	class1
MH	FBtr0290134	3.39405	class1
MH	FBtr0290139	0.260414	class1
MH	FBtr0290223	0.379728	class1
MH	FBtr0290227	-0.443103	class1
MH	FBtr0290234	-0.665264	class1
MH	FBtr0290258	0.0424493	class1
MH	FBtr0290278	0.568404	class1
MH	FBtr0290328	0.418812	class1
MH	FBtr0290334	1.11687	class1
MH	FBtr0290341	0.144616	class1
MH	FBtr0299508	0.54415	class1
MH	FBtr0299516	-0.0605238	class1
MH	FBtr0299564	0.639008	class1
MH	FBtr0299572	-0.745314	class1
MH	FBtr0299600	-0.287329	class1
MH	FBtr0299633	-0.102402	class1
MH	FBtr0299641	0.0281705	class1
MH	FBtr0299688	0.318282	class1
MH	FBtr0299694	-0.985643	class1
MH	FBtr0299789	0.407372	class1
MH	FBtr0299796	-0.134099	class1
MH	FBtr0299806	3.15906	class1
MH	FBtr0299849	-0.612992	class1
MH	FBtr0299851	-0.0834202	class1
MH	FBtr0299868	0.573602	class1
MH	FBtr0299898	0.0369765	class1
MH	FBtr0299903	-0.862015	class1
MH	FBtr0299905	-0.21696	class1
MH	FBtr0299918	-0.4699	class1
MH	FBtr0299952	-0.983678	class1
MH	FBtr0299967	-0.394962	class1
MH	FBtr0299975	0.424129	class1
MH	FBtr0299977	-0.16737	class1
MH	FBtr0300003	0.0694884	class1
MH	FBtr0300006	0.551785	class1
MH	FBtr0300019	0.302273	class1
MH	FBtr0300080	0.78769	class1
MH	FBtr0300103	0.597104	class1
MH	FBtr0300174	-0.824756	class1
MH	FBtr0300177	0.415982	class1
MH	FBtr0300199	-0.913366	class1
MH	FBtr0300237	-0.411348	class1
MH	FBtr0300256	-0.39226	class1
MH	FBtr0300273	0.364428	class1
MH	FBtr0300341	0.451365	class1
MH	FBtr0300379	0.117654	class1
MH	FBtr0300398	-0.0296088	class1
MH	FBtr0300437	0.380254	class1
MH	FBtr0300465	-0.458566	class1
MH	FBtr0300501	0.248393	class1
MH	FBtr0300519	-0.238147	class1
MH	FBtr0300527	-0.294573	class1
MH	FBtr0300611	-0.150183	class1
MH	FBtr0300625	-0.129957	class1
MH	FBtr0300635	-0.360924	class1
MH	FBtr0300643	0.126715	class1
MH	FBtr0300713	0.271219	class1
MH	FBtr0300716	-0.488416	class1
MH	FBtr0300735	0.162299	class1
MH	FBtr0300754	-0.122315	class1
MH	FBtr0300756	-0.779945	class1
MH	FBtr0300789	-0.656719	class1
MH	FBtr0300819	-0.618143	class1
MH	FBtr0300888	-0.0924776	class1
MH	FBtr0300923	0.284837	class1
MH	FBtr0301007	0.264844	class1
MH	FBtr0301008	-0.024009	class1
MH	FBtr0301040	-0.278152	class1
MH	FBtr0301054	-0.823145	class1
MH	FBtr0301073	0.0266668	class1
MH	FBtr0301081	-0.394981	class1
MH	FBtr0301083	-0.255355	class1
MH	FBtr0301134	0.338379	class1
MH	FBtr0301142	0.0976268	class1
MH	FBtr0301161	-0.0698567	class1
MH	FBtr0301180	0.127089	class1
MH	FBtr0301205	0.578645	class1
MH	FBtr0301232	0.38759	class1
MH	FBtr0301234	-0.633426	class1
MH	FBtr0301271	-0.354533	class1
MH	FBtr0301273	0.470545	class1
MH	FBtr0301316	0.240793	class1
MH	FBtr0301368	-0.0990363	class1
MH	FBtr0301390	-0.312992	class1
MH	FBtr0301423	-0.347967	class1
MH	FBtr0301438	-0.414618	class1
MH	FBtr0301452	0.276896	class1
MH	FBtr0301500	0.0511777	class1
MH	FBtr0301507	0.479664	class1
MH	FBtr0301514	0.0774795	class1
MH	FBtr0301577	-0.0398395	class1
MH	FBtr0301600	0.365782	class1
MH	FBtr0301618	0.711438	class1
MH	FBtr0301670	0.0347218	class1
MH	FBtr0301693	0.0929967	class1
MH	FBtr0301717	0.529589	class1
MH	FBtr0301821	-0.295414	class1
MH	FBtr0301929	-0.15275	class1
MH	FBtr0301973	-0.868526	class1
MH	FBtr0302020	-0.0252184	class1
MH	FBtr0302029	-0.918763	class1
MH	FBtr0302107	-0.0660464	class1
MH	FBtr0302199	0.313702	class1
MH	FBtr0302294	0.00604302	class1
MH	FBtr0302302	-0.165181	class1
MH	FBtr0302338	0.0894732	class1
MH	FBtr0302355	0.0544757	class1
MH	FBtr0302492	-0.486797	class1
MH	FBtr0302645	-0.47834	class1
MH	FBtr0302650	0.222586	class1
MH	FBtr0302921	0.62457	class1
MH	FBtr0302925	-0.202485	class1
MH	FBtr0303025	-0.398456	class1
MH	FBtr0303080	-0.675271	class1
MH	FBtr0303161	0.310046	class1
MH	FBtr0303259	-0.265033	class1
MH	FBtr0303341	-0.00271641	class1
MH	FBtr0303381	0.501743	class1
MH	FBtr0303404	-0.352595	class1
MH	FBtr0303406	0.801757	class1
MH	FBtr0303408	-0.369361	class1
MH	FBtr0303486	-0.225695	class1
MH	FBtr0303508	0.0339203	class1
MH	FBtr0303797	-0.316978	class1
MH	FBtr0303842	0.396823	class1
MH	FBtr0303874	-0.100651	class1
MH	FBtr0303908	0.488454	class1
MH	FBtr0304060	0.314205	class1
MH	FBtr0304108	-0.13599	class1
MH	FBtr0304114	0.211729	class1
MH	FBtr0304118	-0.349617	class1
MH	FBtr0304692	0.0447706	class1
MH	FBtr0304694	-0.611156	class1
MH	FBtr0304729	-0.633107	class1
MH	FBtr0304750	-0.553059	class1
MH	FBtr0304801	-0.267381	class1
MH	FBtr0304804	-0.165091	class1
MH	FBtr0304903	1.47657	class1
MH	FBtr0304920	0.13782	class1
MH	FBtr0304924	-0.061768	class1
MH	FBtr0304984	-0.0708703	class1
MH	FBtr0305043	1.70779	class1
MH	FBtr0305060	0.00413231	class1
MH	FBtr0305129	2.11166	class1
MH	FBtr0305132	-0.437508	class1
MH	FBtr0305150	0.920558	class1
MH	FBtr0305214	0.308161	class1
MH	FBtr0305343	0.290229	class1
MH	FBtr0305604	-0.250822	class1
MH	FBtr0305700	0.0737435	class1
MH	FBtr0305916	-0.800897	class1
MH	FBtr0306000	-0.203303	class1
MH	FBtr0306017	-0.113653	class1
MH	FBtr0306024	-0.20931	class1
MH	FBtr0306199	-0.35117	class1
MH	FBtr0306686	-0.174882	class1
MH	FBtr0306735	0.58029	class1
MH	FBtr0306944	-0.536103	class1
MH	FBtr0306948	-0.319204	class1
MH	FBtr0306975	0.447798	class1
MH	FBtr0307018	0.725181	class1
MH	FBtr0307022	-0.371122	class1
MH	FBtr0307051	0.100021	class1
MH	FBtr0307289	0.45341	class1
MH	FBtr0307306	0.0322373	class1
MH	FBtr0307539	-0.322538	class1
MH	FBtr0308076	-0.126216	class1
MH	FBtr0308127	-0.933891	class1
MH	FBtr0308248	-0.00947584	class1
MH	FBtr0308299	0.422632	class1
MH	FBtr0308309	0.257704	class1
MH	FBtr0308583	-0.162829	class1
MH	FBtr0308642	-0.189243	class1
MH	FBtr0308682	-0.00706186	class1
MH	FBtr0308790	0.280774	class1
MH	FBtr0308806	0.0427507	class1
MH	FBtr0309064	0.473596	class1
MH	FBtr0309219	0.115719	class1
MH	FBtr0309251	-0.218996	class1
MH	FBtr0309285	-0.404925	class1
MH	FBtr0309846	-0.156746	class1
MH	FBtr0310045	0.207039	class1
MH	FBtr0310162	-0.716732	class1
MH	FBtr0310310	0.125214	class1
MH	FBtr0310385	-0.0853485	class1
MH	FBtr0310386	-0.151718	class1
MH	FBtr0310448	-0.157381	class1
MH	FBtr0310495	0.807061	class1
MH	FBtr0310555	-0.0233023	class1
MH	FBtr0310625	0.13505	class1
MH	FBtr0321285	-0.148451	class1
MH	FBtr0329880	0.401114	class1
MH	FBtr0329885	0.0138915	class1
MH	FBtr0329887	-0.908346	class1
MH	FBtr0329894	0.0820686	class1
MH	FBtr0329928	0.462858	class1
MH	FBtr0329930	0.72064	class1
MH	FBtr0329935	-0.730285	class1
MH	FBtr0329939	0.203606	class1
MH	FBtr0329949	-0.179143	class1
MH	FBtr0329957	-0.0656539	class1
MH	FBtr0329978	-0.90571	class1
MH	FBtr0329979	0.0678496	class1
MH	FBtr0329983	0.0353936	class1
MH	FBtr0329984	0.0515203	class1
MH	FBtr0329986	0.30336	class1
MH	FBtr0329988	-0.196065	class1
MH	FBtr0329989	0.218212	class1
MH	FBtr0329994	-0.129192	class1
MH	FBtr0330004	-0.287076	class1
MH	FBtr0330024	1.02867	class1
MH	FBtr0330037	0.116759	class1
MH	FBtr0330042	0.289927	class1
MH	FBtr0330047	0.448015	class1
MH	FBtr0330048	-0.523549	class1
MH	FBtr0330049	0.144014	class1
MH	FBtr0330050	0.265186	class1
MH	FBtr0330056	-0.795378	class1
MH	FBtr0330069	-0.333609	class1
MH	FBtr0330072	-0.542074	class1
MH	FBtr0330083	0.975942	class1
MH	FBtr0330089	0.801673	class1
MH	FBtr0330098	0.407686	class1
MH	FBtr0330114	0.179385	class1
MH	FBtr0330123	0.526718	class1
MH	FBtr0330157	0.132389	class1
MH	FBtr0330161	-0.236349	class1
MH	FBtr0330177	0.126835	class1
MH	FBtr0330179	0.41697	class1
MH	FBtr0330187	-0.27936	class1
MH	FBtr0330192	-0.424322	class1
MH	FBtr0330203	-0.539036	class1
MH	FBtr0330205	0.663796	class1
MH	FBtr0330209	-0.196215	class1
MH	FBtr0330210	0.24431	class1
MH	FBtr0330213	0.559776	class1
MH	FBtr0330220	-0.166778	class1
MH	FBtr0330226	-0.349043	class1
MH	FBtr0330227	-0.705736	class1
MH	FBtr0330234	-0.142579	class1
MH	FBtr0330245	0.249227	class1
MH	FBtr0330247	0.97097	class1
MH	FBtr0330249	0.265271	class1
MH	FBtr0330255	0.525952	class1
MH	FBtr0330258	1.56659	class1
MH	FBtr0330274	4.06151	class1
MH	FBtr0330286	0.118572	class1
MH	FBtr0330288	-0.499421	class1
MH	FBtr0330293	-0.0601808	class1
MH	FBtr0330298	-0.900249	class1
MH	FBtr0330299	0.246921	class1
MH	FBtr0330302	-0.187128	class1
MH	FBtr0330309	0.235836	class1
MH	FBtr0330310	-0.774874	class1
MH	FBtr0330313	-0.180996	class1
MH	FBtr0330315	-0.0177287	class1
MH	FBtr0330332	0.0157819	class1
MH	FBtr0330333	0.424884	class1
MH	FBtr0330360	-0.405484	class1
MH	FBtr0330371	0.120563	class1
MH	FBtr0330375	-0.197736	class1
MH	FBtr0330383	0.523586	class1
MH	FBtr0330392	0.0275581	class1
MH	FBtr0330401	-0.0830438	class1
MH	FBtr0330405	0.0011584	class1
MH	FBtr0330418	0.890634	class1
MH	FBtr0330600	-0.231409	class1
MH	FBtr0330612	-0.342257	class1
MH	FBtr0330618	-1.05079	class1
MH	FBtr0330622	-0.10207	class1
MH	FBtr0330629	-0.460022	class1
MH	FBtr0330706	0.356258	class1
MH	FBtr0330708	0.0686113	class1
MH	FBtr0330711	0.597317	class1
MH	FBtr0330736	0.735421	class1
MH	FBtr0331160	-0.471248	class1
MH	FBtr0331161	-0.293858	class1
MH	FBtr0331180	0.535022	class1
MH	FBtr0331182	-1.24838	class1
MH	FBtr0331184	-0.28947	class1
MH	FBtr0331239	-0.0624837	class1
MH	FBtr0331246	0.199039	class1
MH	FBtr0331298	0.336452	class1
MH	FBtr0331303	0.325927	class1
MH	FBtr0331423	-0.640422	class1
MH	FBtr0331503	-0.772745	class1
MH	FBtr0331507	-0.0630358	class1
MH	FBtr0331509	-0.317952	class1
MH	FBtr0331545	-0.0540725	class1
MH	FBtr0331574	0.129129	class1
MH	FBtr0331579	-0.23163	class1
MH	FBtr0331587	0.0754823	class1
MH	FBtr0331677	1.61134	class1
MH	FBtr0331752	-1.67128	class1
MH	FBtr0331771	-0.762323	class1
MH	FBtr0331791	-0.0664244	class1
MH	FBtr0331858	-0.347023	class1
MH	FBtr0331989	-0.897181	class1
MH	FBtr0331996	-0.0854283	class1
MH	FBtr0332102	-0.0389386	class1
MH	FBtr0332119	0.0598246	class1
MH	FBtr0332210	1.13167	class1
MH	FBtr0332292	0.364869	class1
MH	FBtr0332408	0.122019	class1
MH	FBtr0332427	-0.368139	class1
MH	FBtr0332510	-1.78047	class1
MH	FBtr0332558	0.344191	class1
MH	FBtr0332566	-0.0607749	class1
MH	FBtr0332630	0.562669	class1
MH	FBtr0332715	-0.0567725	class1
MH	FBtr0332722	0.228281	class1
MH	FBtr0332818	0.0259031	class1
MH	FBtr0332878	0.60502	class1
MH	FBtr0332911	1.19352	class1
MH	FBtr0332932	-0.419501	class1
MH	FBtr0332964	0.12407	class1
MH	FBtr0333049	0.465877	class1
MH	FBtr0333101	0.116782	class1
MH	FBtr0333121	-0.17801	class1
MH	FBtr0333208	-0.0595792	class1
MH	FBtr0333355	0.628522	class1
MH	FBtr0333661	0.372185	class1
MH	FBtr0333685	0.792186	class1
MH	FBtr0333700	0.275665	class1
MH	FBtr0333714	0.635157	class1
MH	FBtr0333836	0.70118	class1
MH	FBtr0333881	-0.115777	class1
MH	FBtr0333898	-0.793512	class1
MH	FBtr0333961	-0.454316	class1
MH	FBtr0334005	0.881256	class1
MH	FBtr0334079	-0.0836214	class1
MH	FBtr0334134	-2.31148	class1
MH	FBtr0334276	0.682977	class1
MH	FBtr0334408	0.411816	class1
MH	FBtr0334465	0.214638	class1
MH	FBtr0334510	0.0377483	class1
MH	FBtr0334515	-0.247189	class1
MH	FBtr0334547	0.214361	class1
MH	FBtr0334552	-0.16538	class1
MH	FBtr0334574	-0.00452771	class1
MH	FBtr0334584	-0.073342	class1
MH	FBtr0334610	0.0663179	class1
MH	FBtr0334636	0.0198895	class1
MH	FBtr0334677	0.172425	class1
MH	FBtr0334724	0.0446317	class1
MH	FBtr0334820	0.473451	class1
MH	FBtr0334898	-0.0425139	class1
MH	FBtr0334939	0.503724	class1
MH	FBtr0334984	-0.653915	class1
MH	FBtr0335013	-0.0441775	class1
MH	FBtr0335015	0.222689	class1
MH	FBtr0335432	0.0309496	class1
MH	FBtr0336477	0.212585	class1
MH	FBtr0336483	0.0993404	class1
MH	FBtr0336615	0.20341	class1
MH	FBtr0336627	0.893689	class1
MH	FBtr0336634	-0.413976	class1
MH	FBtr0336725	-0.395011	class1
MH	FBtr0336747	-0.366665	class1
MH	FBtr0336853	-0.498765	class1
MH	FBtr0336998	-0.433692	class1
MH	FBtr0337105	-0.384101	class1
MH	FBtr0339071	0.0457067	class1
MH	FBtr0339097	0.599701	class1
MH	FBtr0339108	0.619303	class1
MH	FBtr0339129	-2.40928	class1
MH	FBtr0339154	0.0817827	class1
MH	FBtr0339160	-0.0655889	class1
MH	FBtr0339281	-0.819463	class1
MH	FBtr0339420	-0.327327	class1
MH	FBtr0339507	-0.409802	class1
MH	FBtr0339583	0.0948902	class1
MH	FBtr0339679	0.268633	class1
MH	FBtr0339697	0.562556	class1
MH	FBtr0339836	-0.49532	class1
MH	FBtr0340054	-0.264282	class1
MH	FBtr0340086	1.26986	class1
MH	FBtr0340158	-0.0204029	class1
MH	FBtr0340208	0.57231	class1
MH	FBtr0340271	0.102357	class1
MH	FBtr0340305	-0.665921	class1
MH	FBtr0340335	-0.361825	class1
MH	FBtr0340405	0.537199	class1
MH	FBtr0340421	-0.065442	class1
MH	FBtr0340543	0.0976621	class1
MH	FBtr0340553	0.458251	class1
MH	FBtr0340621	0.0951113	class1
MH	FBtr0340635	0.184131	class1
MH	FBtr0342717	-0.0402705	class1
MH	FBtr0342842	-0.122267	class1
MH	FBtr0342890	-0.0916503	class1
MH	FBtr0343010	-0.0395141	class1
MH	FBtr0343015	-0.0265515	class1
MH	FBtr0343018	0.752678	class1
MH	FBtr0343131	0.218609	class1
MH	FBtr0343137	1.06498	class1
MH	FBtr0343169	-0.819484	class1
MH	FBtr0343336	-0.154818	class1
MH	FBtr0343359	2.20104	class1
MH	FBtr0343523	0.146006	class1
MH	FBtr0343552	0.568857	class1
MH	FBtr0343728	0.25212	class1
MH	FBtr0343753	-1.63935	class1
MH	FBtr0343754	-1.75808	class1
MH	FBtr0343756	1.76587	class1
MH	FBtr0343932	-0.0849252	class1
MH	FBtr0343994	1.10585	class1
MH	FBtr0343995	-0.324836	class1
MH	FBtr0344189	0.122829	class1
MH	FBtr0344239	-0.671003	class1
MH	FBtr0344296	-0.235	class1
MH	FBtr0344358	-0.210443	class1
MH	FBtr0344408	-0.403703	class1
MH	FBtr0344528	1.57669	class1
MH	FBtr0344559	-0.90863	class1
MH	FBtr0344636	0.516045	class1
MH	FBtr0344662	0.287532	class1
MH	FBtr0344758	-0.189209	class1
MH	FBtr0344822	0.403625	class1
MH	FBtr0344912	0.217732	class1
MH	FBtr0345460	-0.12387	class1
MH	FBtr0345482	-1.20192	class1
MH	FBtr0346668	-0.560147	class1
MH	FBtr0346766	-1.15578	class1
MH	FBtr0346818	0.371916	class1
MH	FBtr0346864	0.313936	class1
MH	FBtr0347110	0.836891	class1
MH	FBtr0347111	-0.913626	class1
MH	FBtr0347158	-0.357095	class1
MH	FBtr0347287	-1.06202	class1
MH	FBtr0347395	0.69385	class1
MH	FBtr0070026	-0.203846	class2
MH	FBtr0070028	-0.497134	class2
MH	FBtr0070103	-1.00763	class2
MH	FBtr0070140	1.41369	class2
MH	FBtr0070146	0.331172	class2
MH	FBtr0070151	0.259168	class2
MH	FBtr0070176	-0.19005	class2
MH	FBtr0070182	0.401651	class2
MH	FBtr0070235	-0.249792	class2
MH	FBtr0070238	1.06437	class2
MH	FBtr0070270	1.00767	class2
MH	FBtr0070277	-0.0142931	class2
MH	FBtr0070279	-0.760175	class2
MH	FBtr0070284	1.50783	class2
MH	FBtr0070313	-0.00483125	class2
MH	FBtr0070316	-0.00422104	class2
MH	FBtr0070340	0.0026301	class2
MH	FBtr0070345	-0.155978	class2
MH	FBtr0070381	-0.373548	class2
MH	FBtr0070405	-0.693731	class2
MH	FBtr0070429	0.220216	class2
MH	FBtr0070432	0.259936	class2
MH	FBtr0070439	0.161031	class2
MH	FBtr0070442	-1.23508	class2
MH	FBtr0070494	-0.199639	class2
MH	FBtr0070507	-0.569528	class2
MH	FBtr0070527	-1.79644	class2
MH	FBtr0070575	-0.388372	class2
MH	FBtr0070626	0.252462	class2
MH	FBtr0070627	0.0716115	class2
MH	FBtr0070643	1.34011	class2
MH	FBtr0070650	0.114761	class2
MH	FBtr0070685	0.781234	class2
MH	FBtr0070713	-0.71882	class2
MH	FBtr0070724	-0.836875	class2
MH	FBtr0070778	-0.80498	class2
MH	FBtr0070827	0.584669	class2
MH	FBtr0070828	0.0882621	class2
MH	FBtr0070841	0.0298267	class2
MH	FBtr0070847	-0.257944	class2
MH	FBtr0070872	-2.44665	class2
MH	FBtr0070889	0.570542	class2
MH	FBtr0070890	-0.0134048	class2
MH	FBtr0070914	-0.218284	class2
MH	FBtr0070948	-0.842877	class2
MH	FBtr0070959	-0.104996	class2
MH	FBtr0070972	-0.00587564	class2
MH	FBtr0070984	1.35761	class2
MH	FBtr0070988	0.180942	class2
MH	FBtr0070990	-0.689206	class2
MH	FBtr0071013	0.32748	class2
MH	FBtr0071017	-0.728894	class2
MH	FBtr0071042	0.153536	class2
MH	FBtr0071066	0.76507	class2
MH	FBtr0071089	-0.374917	class2
MH	FBtr0071092	0.200925	class2
MH	FBtr0071093	0.24814	class2
MH	FBtr0071112	-0.195367	class2
MH	FBtr0071125	-0.334225	class2
MH	FBtr0071170	-0.261992	class2
MH	FBtr0071174	-0.433457	class2
MH	FBtr0071175	-0.11481	class2
MH	FBtr0071223	-0.713185	class2
MH	FBtr0071224	0.364536	class2
MH	FBtr0071246	0.592262	class2
MH	FBtr0071299	-0.58434	class2
MH	FBtr0071349	0.427457	class2
MH	FBtr0071397	-0.347732	class2
MH	FBtr0071450	-0.0625944	class2
MH	FBtr0071460	-0.305099	class2
MH	FBtr0071493	-0.164783	class2
MH	FBtr0071546	-0.382271	class2
MH	FBtr0071563	-0.0282521	class2
MH	FBtr0071590	-0.361511	class2
MH	FBtr0071609	-0.114258	class2
MH	FBtr0071610	-0.454291	class2
MH	FBtr0071613	0.0255309	class2
MH	FBtr0071636	0.238485	class2
MH	FBtr0071637	-0.344485	class2
MH	FBtr0071671	-0.0879917	class2
MH	FBtr0071688	-0.38938	class2
MH	FBtr0071763	0.698037	class2
MH	FBtr0071775	-0.0545819	class2
MH	FBtr0071777	-0.178107	class2
MH	FBtr0071833	0.0599868	class2
MH	FBtr0071868	-0.387951	class2
MH	FBtr0071942	-0.882323	class2
MH	FBtr0072057	0.399651	class2
MH	FBtr0072129	-0.00731925	class2
MH	FBtr0072145	-0.267699	class2
MH	FBtr0072154	0.223642	class2
MH	FBtr0072166	0.0785981	class2
MH	FBtr0072177	0.277847	class2
MH	FBtr0072195	-0.17291	class2
MH	FBtr0072207	-0.169456	class2
MH	FBtr0072220	-0.168643	class2
MH	FBtr0072250	0.0871439	class2
MH	FBtr0072251	-0.737419	class2
MH	FBtr0072252	-0.219513	class2
MH	FBtr0072260	-0.309463	class2
MH	FBtr0072285	-0.0572227	class2
MH	FBtr0072289	0.270798	class2
MH	FBtr0072369	-0.0082119	class2
MH	FBtr0072396	-0.458877	class2
MH	FBtr0072397	0.0052735	class2
MH	FBtr0072441	0.813339	class2
MH	FBtr0072464	0.201758	class2
MH	FBtr0072515	-0.497906	class2
MH	FBtr0072532	-0.0791376	class2
MH	FBtr0072562	0.427567	class2
MH	FBtr0072573	-0.346766	class2
MH	FBtr0072589	0.0817133	class2
MH	FBtr0072593	-0.0796189	class2
MH	FBtr0072597	-0.22239	class2
MH	FBtr0072607	0.518601	class2
MH	FBtr0072610	-0.412194	class2
MH	FBtr0072611	0.125391	class2
MH	FBtr0072619	0.00402295	class2
MH	FBtr0072639	0.0213359	class2
MH	FBtr0072642	0.783389	class2
MH	FBtr0072729	-0.307123	class2
MH	FBtr0072742	0.073597	class2
MH	FBtr0072743	0.178815	class2
MH	FBtr0072747	0.402165	class2
MH	FBtr0072905	-0.131822	class2
MH	FBtr0072915	0.335047	class2
MH	FBtr0072921	0.318108	class2
MH	FBtr0072970	-0.0786821	class2
MH	FBtr0072980	-0.240666	class2
MH	FBtr0072984	-0.228263	class2
MH	FBtr0073035	-0.11232	class2
MH	FBtr0073082	0.582358	class2
MH	FBtr0073163	-0.28966	class2
MH	FBtr0073187	0.0344214	class2
MH	FBtr0073217	0.0783026	class2
MH	FBtr0073219	-0.358692	class2
MH	FBtr0073271	-0.159061	class2
MH	FBtr0073275	-0.493207	class2
MH	FBtr0073310	-0.196949	class2
MH	FBtr0073323	1.62171	class2
MH	FBtr0073337	-0.0899462	class2
MH	FBtr0073345	0.360269	class2
MH	FBtr0073453	-0.617641	class2
MH	FBtr0073454	-0.280784	class2
MH	FBtr0073457	-0.099739	class2
MH	FBtr0073480	0.341874	class2
MH	FBtr0073481	-0.45436	class2
MH	FBtr0073497	0.49948	class2
MH	FBtr0073499	0.45198	class2
MH	FBtr0073521	0.20468	class2
MH	FBtr0073552	0.22259	class2
MH	FBtr0073574	-0.268275	class2
MH	FBtr0073579	-0.135601	class2
MH	FBtr0073580	-0.555995	class2
MH	FBtr0073590	0.214326	class2
MH	FBtr0073620	-0.635913	class2
MH	FBtr0073641	0.0111948	class2
MH	FBtr0073656	-0.166886	class2
MH	FBtr0073678	-0.06947	class2
MH	FBtr0073747	0.490406	class2
MH	FBtr0073834	0.0719825	class2
MH	FBtr0073843	-0.201075	class2
MH	FBtr0073844	-0.863776	class2
MH	FBtr0073847	-0.451648	class2
MH	FBtr0073849	-0.314366	class2
MH	FBtr0073913	-0.0238369	class2
MH	FBtr0073939	-0.0612287	class2
[truncated: 92,671 more rows]
