# Supplementary material for: Upstream open reading frames buffer translational variability during Drosophila evolution and development
Source: eLife. 2025 Jun 6;14:RP104074. doi: 10.7554/eLife.104074 (PMC12143884; doi:10.7554/eLife.104074)
Supplement: Figure 3—source data 1. [file elife-104074-fig3-data1.xlsx]

## Sheet: Fig3A
Sample	dmel	dsim
embryo 0-2h	0.451894	0.447932
embryo 2-6h	0.214798	0.248934
embryo 6-12h	0.132469	0.213025
embryo 12-24h	0.154647	0.192803
larva	0.238097	0.239419
pupa	0.266872	0.273715
female body	0.255798	0.20642
male body	0.294856	0.258353
female head	0.112554	0.211568
male head	0.170429	0.211728

## Sheet: Fig3B
# em02 = "embryo 0-2 h", "em26" = "embryo 2-6 h", "em612" = "embryo 6-12 h", "em1224" = "embryo 12-24 h","larva" = "larva", "pupa" = "pupa", "fem" = "female body", "mal" = "male body", "FH" = "female head", "MH" = "male head"	# em02 = "embryo 0-2 h", "em26" = "embryo 2-6 h", "em612" = "embryo 6-12 h", "em1224" = "embryo 12-24 h","larva" = "larva", "pupa" = "pupa", "fem" = "female body", "mal" = "male body", "FH" = "female head", "MH" = "male head"	# em02 = "embryo 0-2 h", "em26" = "embryo 2-6 h", "em612" = "embryo 6-12 h", "em1224" = "embryo 12-24 h","larva" = "larva", "pupa" = "pupa", "fem" = "female body", "mal" = "male body", "FH" = "female head", "MH" = "male head"	# em02 = "embryo 0-2 h", "em26" = "embryo 2-6 h", "em612" = "embryo 6-12 h", "em1224" = "embryo 12-24 h","larva" = "larva", "pupa" = "pupa", "fem" = "female body", "mal" = "male body", "FH" = "female head", "MH" = "male head"	# em02 = "embryo 0-2 h", "em26" = "embryo 2-6 h", "em612" = "embryo 6-12 h", "em1224" = "embryo 12-24 h","larva" = "larva", "pupa" = "pupa", "fem" = "female body", "mal" = "male body", "FH" = "female head", "MH" = "male head"	# em02 = "embryo 0-2 h", "em26" = "embryo 2-6 h", "em612" = "embryo 6-12 h", "em1224" = "embryo 12-24 h","larva" = "larva", "pupa" = "pupa", "fem" = "female body", "mal" = "male body", "FH" = "female head", "MH" = "male head"	# em02 = "embryo 0-2 h", "em26" = "embryo 2-6 h", "em612" = "embryo 6-12 h", "em1224" = "embryo 12-24 h","larva" = "larva", "pupa" = "pupa", "fem" = "female body", "mal" = "male body", "FH" = "female head", "MH" = "male head"	# em02 = "embryo 0-2 h", "em26" = "embryo 2-6 h", "em612" = "embryo 6-12 h", "em1224" = "embryo 12-24 h","larva" = "larva", "pupa" = "pupa", "fem" = "female body", "mal" = "male body", "FH" = "female head", "MH" = "male head"	# em02 = "embryo 0-2 h", "em26" = "embryo 2-6 h", "em612" = "embryo 6-12 h", "em1224" = "embryo 12-24 h","larva" = "larva", "pupa" = "pupa", "fem" = "female body", "mal" = "male body", "FH" = "female head", "MH" = "male head"	# em02 = "embryo 0-2 h", "em26" = "embryo 2-6 h", "em612" = "embryo 6-12 h", "em1224" = "embryo 12-24 h","larva" = "larva", "pupa" = "pupa", "fem" = "female body", "mal" = "male body", "FH" = "female head", "MH" = "male head"	# em02 = "embryo 0-2 h", "em26" = "embryo 2-6 h", "em612" = "embryo 6-12 h", "em1224" = "embryo 12-24 h","larva" = "larva", "pupa" = "pupa", "fem" = "female body", "mal" = "male body", "FH" = "female head", "MH" = "male head"	# em02 = "embryo 0-2 h", "em26" = "embryo 2-6 h", "em612" = "embryo 6-12 h", "em1224" = "embryo 12-24 h","larva" = "larva", "pupa" = "pupa", "fem" = "female body", "mal" = "male body", "FH" = "female head", "MH" = "male head"	# em02 = "embryo 0-2 h", "em26" = "embryo 2-6 h", "em612" = "embryo 6-12 h", "em1224" = "embryo 12-24 h","larva" = "larva", "pupa" = "pupa", "fem" = "female body", "mal" = "male body", "FH" = "female head", "MH" = "male head"	# em02 = "embryo 0-2 h", "em26" = "embryo 2-6 h", "em612" = "embryo 6-12 h", "em1224" = "embryo 12-24 h","larva" = "larva", "pupa" = "pupa", "fem" = "female body", "mal" = "male body", "FH" = "female head", "MH" = "male head"	# em02 = "embryo 0-2 h", "em26" = "embryo 2-6 h", "em612" = "embryo 6-12 h", "em1224" = "embryo 12-24 h","larva" = "larva", "pupa" = "pupa", "fem" = "female body", "mal" = "male body", "FH" = "female head", "MH" = "male head"	# em02 = "embryo 0-2 h", "em26" = "embryo 2-6 h", "em612" = "embryo 6-12 h", "em1224" = "embryo 12-24 h","larva" = "larva", "pupa" = "pupa", "fem" = "female body", "mal" = "male body", "FH" = "female head", "MH" = "male head"	# em02 = "embryo 0-2 h", "em26" = "embryo 2-6 h", "em612" = "embryo 6-12 h", "em1224" = "embryo 12-24 h","larva" = "larva", "pupa" = "pupa", "fem" = "female body", "mal" = "male body", "FH" = "female head", "MH" = "male head"	# em02 = "embryo 0-2 h", "em26" = "embryo 2-6 h", "em612" = "embryo 6-12 h", "em1224" = "embryo 12-24 h","larva" = "larva", "pupa" = "pupa", "fem" = "female body", "mal" = "male body", "FH" = "female head", "MH" = "male head"	# em02 = "embryo 0-2 h", "em26" = "embryo 2-6 h", "em612" = "embryo 6-12 h", "em1224" = "embryo 12-24 h","larva" = "larva", "pupa" = "pupa", "fem" = "female body", "mal" = "male body", "FH" = "female head", "MH" = "male head"	# em02 = "embryo 0-2 h", "em26" = "embryo 2-6 h", "em612" = "embryo 6-12 h", "em1224" = "embryo 12-24 h","larva" = "larva", "pupa" = "pupa", "fem" = "female body", "mal" = "male body", "FH" = "female head", "MH" = "male head"	# em02 = "embryo 0-2 h", "em26" = "embryo 2-6 h", "em612" = "embryo 6-12 h", "em1224" = "embryo 12-24 h","larva" = "larva", "pupa" = "pupa", "fem" = "female body", "mal" = "male body", "FH" = "female head", "MH" = "male head"	# em02 = "embryo 0-2 h", "em26" = "embryo 2-6 h", "em612" = "embryo 6-12 h", "em1224" = "embryo 12-24 h","larva" = "larva", "pupa" = "pupa", "fem" = "female body", "mal" = "male body", "FH" = "female head", "MH" = "male head"	# em02 = "embryo 0-2 h", "em26" = "embryo 2-6 h", "em612" = "embryo 6-12 h", "em1224" = "embryo 12-24 h","larva" = "larva", "pupa" = "pupa", "fem" = "female body", "mal" = "male body", "FH" = "female head", "MH" = "male head"	# em02 = "embryo 0-2 h", "em26" = "embryo 2-6 h", "em612" = "embryo 6-12 h", "em1224" = "embryo 12-24 h","larva" = "larva", "pupa" = "pupa", "fem" = "female body", "mal" = "male body", "FH" = "female head", "MH" = "male head"	# em02 = "embryo 0-2 h", "em26" = "embryo 2-6 h", "em612" = "embryo 6-12 h", "em1224" = "embryo 12-24 h","larva" = "larva", "pupa" = "pupa", "fem" = "female body", "mal" = "male body", "FH" = "female head", "MH" = "male head"	# em02 = "embryo 0-2 h", "em26" = "embryo 2-6 h", "em612" = "embryo 6-12 h", "em1224" = "embryo 12-24 h","larva" = "larva", "pupa" = "pupa", "fem" = "female body", "mal" = "male body", "FH" = "female head", "MH" = "male head"	# em02 = "embryo 0-2 h", "em26" = "embryo 2-6 h", "em612" = "embryo 6-12 h", "em1224" = "embryo 12-24 h","larva" = "larva", "pupa" = "pupa", "fem" = "female body", "mal" = "male body", "FH" = "female head", "MH" = "male head"	# em02 = "embryo 0-2 h", "em26" = "embryo 2-6 h", "em612" = "embryo 6-12 h", "em1224" = "embryo 12-24 h","larva" = "larva", "pupa" = "pupa", "fem" = "female body", "mal" = "male body", "FH" = "female head", "MH" = "male head"	# em02 = "embryo 0-2 h", "em26" = "embryo 2-6 h", "em612" = "embryo 6-12 h", "em1224" = "embryo 12-24 h","larva" = "larva", "pupa" = "pupa", "fem" = "female body", "mal" = "male body", "FH" = "female head", "MH" = "male head"	# em02 = "embryo 0-2 h", "em26" = "embryo 2-6 h", "em612" = "embryo 6-12 h", "em1224" = "embryo 12-24 h","larva" = "larva", "pupa" = "pupa", "fem" = "female body", "mal" = "male body", "FH" = "female head", "MH" = "male head"	# em02 = "embryo 0-2 h", "em26" = "embryo 2-6 h", "em612" = "embryo 6-12 h", "em1224" = "embryo 12-24 h","larva" = "larva", "pupa" = "pupa", "fem" = "female body", "mal" = "male body", "FH" = "female head", "MH" = "male head"	# em02 = "embryo 0-2 h", "em26" = "embryo 2-6 h", "em612" = "embryo 6-12 h", "em1224" = "embryo 12-24 h","larva" = "larva", "pupa" = "pupa", "fem" = "female body", "mal" = "male body", "FH" = "female head", "MH" = "male head"	# em02 = "embryo 0-2 h", "em26" = "embryo 2-6 h", "em612" = "embryo 6-12 h", "em1224" = "embryo 12-24 h","larva" = "larva", "pupa" = "pupa", "fem" = "female body", "mal" = "male body", "FH" = "female head", "MH" = "male head"	# em02 = "embryo 0-2 h", "em26" = "embryo 2-6 h", "em612" = "embryo 6-12 h", "em1224" = "embryo 12-24 h","larva" = "larva", "pupa" = "pupa", "fem" = "female body", "mal" = "male body", "FH" = "female head", "MH" = "male head"	# em02 = "embryo 0-2 h", "em26" = "embryo 2-6 h", "em612" = "embryo 6-12 h", "em1224" = "embryo 12-24 h","larva" = "larva", "pupa" = "pupa", "fem" = "female body", "mal" = "male body", "FH" = "female head", "MH" = "male head"	# em02 = "embryo 0-2 h", "em26" = "embryo 2-6 h", "em612" = "embryo 6-12 h", "em1224" = "embryo 12-24 h","larva" = "larva", "pupa" = "pupa", "fem" = "female body", "mal" = "male body", "FH" = "female head", "MH" = "male head"	# em02 = "embryo 0-2 h", "em26" = "embryo 2-6 h", "em612" = "embryo 6-12 h", "em1224" = "embryo 12-24 h","larva" = "larva", "pupa" = "pupa", "fem" = "female body", "mal" = "male body", "FH" = "female head", "MH" = "male head"	# em02 = "embryo 0-2 h", "em26" = "embryo 2-6 h", "em612" = "embryo 6-12 h", "em1224" = "embryo 12-24 h","larva" = "larva", "pupa" = "pupa", "fem" = "female body", "mal" = "male body", "FH" = "female head", "MH" = "male head"	# em02 = "embryo 0-2 h", "em26" = "embryo 2-6 h", "em612" = "embryo 6-12 h", "em1224" = "embryo 12-24 h","larva" = "larva", "pupa" = "pupa", "fem" = "female body", "mal" = "male body", "FH" = "female head", "MH" = "male head"	# em02 = "embryo 0-2 h", "em26" = "embryo 2-6 h", "em612" = "embryo 6-12 h", "em1224" = "embryo 12-24 h","larva" = "larva", "pupa" = "pupa", "fem" = "female body", "mal" = "male body", "FH" = "female head", "MH" = "male head"	# em02 = "embryo 0-2 h", "em26" = "embryo 2-6 h", "em612" = "embryo 6-12 h", "em1224" = "embryo 12-24 h","larva" = "larva", "pupa" = "pupa", "fem" = "female body", "mal" = "male body", "FH" = "female head", "MH" = "male head"	# em02 = "embryo 0-2 h", "em26" = "embryo 2-6 h", "em612" = "embryo 6-12 h", "em1224" = "embryo 12-24 h","larva" = "larva", "pupa" = "pupa", "fem" = "female body", "mal" = "male body", "FH" = "female head", "MH" = "male head"	# em02 = "embryo 0-2 h", "em26" = "embryo 2-6 h", "em612" = "embryo 6-12 h", "em1224" = "embryo 12-24 h","larva" = "larva", "pupa" = "pupa", "fem" = "female body", "mal" = "male body", "FH" = "female head", "MH" = "male head"	# em02 = "embryo 0-2 h", "em26" = "embryo 2-6 h", "em612" = "embryo 6-12 h", "em1224" = "embryo 12-24 h","larva" = "larva", "pupa" = "pupa", "fem" = "female body", "mal" = "male body", "FH" = "female head", "MH" = "male head"	# em02 = "embryo 0-2 h", "em26" = "embryo 2-6 h", "em612" = "embryo 6-12 h", "em1224" = "embryo 12-24 h","larva" = "larva", "pupa" = "pupa", "fem" = "female body", "mal" = "male body", "FH" = "female head", "MH" = "male head"	# em02 = "embryo 0-2 h", "em26" = "embryo 2-6 h", "em612" = "embryo 6-12 h", "em1224" = "embryo 12-24 h","larva" = "larva", "pupa" = "pupa", "fem" = "female body", "mal" = "male body", "FH" = "female head", "MH" = "male head"	# em02 = "embryo 0-2 h", "em26" = "embryo 2-6 h", "em612" = "embryo 6-12 h", "em1224" = "embryo 12-24 h","larva" = "larva", "pupa" = "pupa", "fem" = "female body", "mal" = "male body", "FH" = "female head", "MH" = "male head"	# em02 = "embryo 0-2 h", "em26" = "embryo 2-6 h", "em612" = "embryo 6-12 h", "em1224" = "embryo 12-24 h","larva" = "larva", "pupa" = "pupa", "fem" = "female body", "mal" = "male body", "FH" = "female head", "MH" = "male head"	# em02 = "embryo 0-2 h", "em26" = "embryo 2-6 h", "em612" = "embryo 6-12 h", "em1224" = "embryo 12-24 h","larva" = "larva", "pupa" = "pupa", "fem" = "female body", "mal" = "male body", "FH" = "female head", "MH" = "male head"	# em02 = "embryo 0-2 h", "em26" = "embryo 2-6 h", "em612" = "embryo 6-12 h", "em1224" = "embryo 12-24 h","larva" = "larva", "pupa" = "pupa", "fem" = "female body", "mal" = "male body", "FH" = "female head", "MH" = "male head"
Transcript_id	uORF_id	abs_TE_log2FC	feature	stages
FBtr0006151	FBtr0006151_1039	1.25436	uORF	em02
FBtr0006151	FBtr0006151_1048	1.94671	uORF	em02
FBtr0006151	FBtr0006151_1060	1.44894	uORF	em02
FBtr0070026	FBtr0070026_78	-1.45062	uORF	em02
FBtr0070028	FBtr0070028_236	0.186284	uORF	em02
FBtr0070028	FBtr0070028_388	1.22832	uORF	em02
FBtr0070028	FBtr0070028_394	1.25008	uORF	em02
FBtr0070028	FBtr0070028_60	-1.36385	uORF	em02
FBtr0070045	FBtr0070045_35	-0.374751	uORF	em02
FBtr0070079	FBtr0070079_96	2.1858	uORF	em02
FBtr0070091	FBtr0070091_146	3.52977	uORF	em02
FBtr0070103	FBtr0070103_138	-0.621521	uORF	em02
FBtr0070103	FBtr0070103_238	4	uORF	em02
FBtr0070103	FBtr0070103_308	-1.39902	uORF	em02
FBtr0070110	FBtr0070110_11	1.60079	uORF	em02
FBtr0070110	FBtr0070110_147	4	uORF	em02
FBtr0070110	FBtr0070110_29	1.60079	uORF	em02
FBtr0070123	FBtr0070123_106	0.727888	uORF	em02
FBtr0070140	FBtr0070140_116	-1.69614	uORF	em02
FBtr0070146	FBtr0070146_208	-0.816284	uORF	em02
FBtr0070146	FBtr0070146_242	-1.26479	uORF	em02
FBtr0070146	FBtr0070146_36	-3.647	uORF	em02
FBtr0070146	FBtr0070146_470	-2.73947	uORF	em02
FBtr0070151	FBtr0070151_241	-2.37562	uORF	em02
FBtr0070151	FBtr0070151_247	-2.10485	uORF	em02
FBtr0070151	FBtr0070151_380	-0.702488	uORF	em02
FBtr0070151	FBtr0070151_429	0.271477	uORF	em02
FBtr0070167	FBtr0070167_168	-3.33111	uORF	em02
FBtr0070167	FBtr0070167_489	2.06032	uORF	em02
FBtr0070174	FBtr0070174_15	2.04349	uORF	em02
FBtr0070176	FBtr0070176_49	2.30869	uORF	em02
FBtr0070176	FBtr0070176_57	1.89038	uORF	em02
FBtr0070176	FBtr0070176_87	0.256551	uORF	em02
FBtr0070182	FBtr0070182_108	0.391951	uORF	em02
FBtr0070182	FBtr0070182_126	-0.480262	uORF	em02
FBtr0070209	FBtr0070209_191	-2.60794	uORF	em02
FBtr0070209	FBtr0070209_247	1.90574	uORF	em02
FBtr0070209	FBtr0070209_97	-1.24178	uORF	em02
FBtr0070235	FBtr0070235_141	-2.56643	uORF	em02
FBtr0070235	FBtr0070235_248	-2.0612	uORF	em02
FBtr0070235	FBtr0070235_272	-2.2726	uORF	em02
FBtr0070245	FBtr0070245_72	1.64525	uORF	em02
FBtr0070253	FBtr0070253_53	-2.96723	uORF	em02
FBtr0070259	FBtr0070259_271	-0.946094	uORF	em02
FBtr0070260	FBtr0070260_18	0.626365	uORF	em02
FBtr0070260	FBtr0070260_242	-1.19558	uORF	em02
FBtr0070260	FBtr0070260_46	0.967729	uORF	em02
FBtr0070270	FBtr0070270_124	0.594638	uORF	em02
FBtr0070270	FBtr0070270_210	1.15986	uORF	em02
FBtr0070270	FBtr0070270_246	1.31425	uORF	em02
FBtr0070270	FBtr0070270_264	0.0526104	uORF	em02
FBtr0070270	FBtr0070270_270	0.0438583	uORF	em02
FBtr0070279	FBtr0070279_122	0.0359785	uORF	em02
FBtr0070279	FBtr0070279_203	-0.810931	uORF	em02
FBtr0070279	FBtr0070279_291	-3.23195	uORF	em02
FBtr0070283	FBtr0070283_121	0.671284	uORF	em02
FBtr0070289	FBtr0070289_74	4	uORF	em02
FBtr0070289	FBtr0070289_81	-3.62144	uORF	em02
FBtr0070293	FBtr0070293_159	3.31511	uORF	em02
FBtr0070293	FBtr0070293_347	1.079	uORF	em02
FBtr0070308	FBtr0070308_29	-1.47926	uORF	em02
FBtr0070313	FBtr0070313_203	2.23825	uORF	em02
FBtr0070313	FBtr0070313_88	2.90826	uORF	em02
FBtr0070314	FBtr0070314_28	1.16724	uORF	em02
FBtr0070316	FBtr0070316_127	-1.19267	uORF	em02
FBtr0070316	FBtr0070316_337	-2.58811	uORF	em02
FBtr0070316	FBtr0070316_97	-1.00679	uORF	em02
FBtr0070317	FBtr0070317_223	0.0472955	uORF	em02
FBtr0070317	FBtr0070317_286	-0.764383	uORF	em02
FBtr0070317	FBtr0070317_84	-1.1413	uORF	em02
FBtr0070318	FBtr0070318_30	0.280456	uORF	em02
FBtr0070330	FBtr0070330_112	0.77079	uORF	em02
FBtr0070330	FBtr0070330_132	1.40815	uORF	em02
FBtr0070330	FBtr0070330_253	-0.399084	uORF	em02
FBtr0070330	FBtr0070330_657	-1.93963	uORF	em02
FBtr0070330	FBtr0070330_764	1.33893	uORF	em02
FBtr0070340	FBtr0070340_107	2.62842	uORF	em02
FBtr0070345	FBtr0070345_75	-0.951861	uORF	em02
FBtr0070345	FBtr0070345_78	-0.972702	uORF	em02
FBtr0070345	FBtr0070345_83	-1.17009	uORF	em02
FBtr0070346	FBtr0070346_158	-1.54246	uORF	em02
FBtr0070346	FBtr0070346_164	-1.0733	uORF	em02
FBtr0070346	FBtr0070346_34	1.87323	uORF	em02
FBtr0070363	FBtr0070363_49	-1.78925	uORF	em02
FBtr0070369	FBtr0070369_78	3.78037	uORF	em02
FBtr0070381	FBtr0070381_60	2.24471	uORF	em02
FBtr0070381	FBtr0070381_64	3.14515	uORF	em02
FBtr0070389	FBtr0070389_37	-1.27979	uORF	em02
FBtr0070393	FBtr0070393_470	-0.749609	uORF	em02
FBtr0070401	FBtr0070401_435	-0.105142	uORF	em02
FBtr0070401	FBtr0070401_461	-0.296874	uORF	em02
FBtr0070401	FBtr0070401_54	0.386322	uORF	em02
FBtr0070401	FBtr0070401_551	-1.35727	uORF	em02
FBtr0070405	FBtr0070405_73	1.9932	uORF	em02
FBtr0070406	FBtr0070406_721	3.53941	uORF	em02
FBtr0070408	FBtr0070408_167	1.00463	uORF	em02
FBtr0070412	FBtr0070412_190	1.66811	uORF	em02
FBtr0070412	FBtr0070412_385	1.87375	uORF	em02
FBtr0070412	FBtr0070412_69	0.163324	uORF	em02
FBtr0070414	FBtr0070414_242	0.984222	uORF	em02
FBtr0070414	FBtr0070414_350	0.6915	uORF	em02
FBtr0070414	FBtr0070414_376	0.330841	uORF	em02
FBtr0070414	FBtr0070414_44	0.927402	uORF	em02
FBtr0070414	FBtr0070414_62	0.779504	uORF	em02
FBtr0070419	FBtr0070419_62	1.3184	uORF	em02
FBtr0070429	FBtr0070429_305	-2.10958	uORF	em02
FBtr0070429	FBtr0070429_308	4	uORF	em02
FBtr0070429	FBtr0070429_393	-1.85173	uORF	em02
FBtr0070429	FBtr0070429_405	-1.65504	uORF	em02
FBtr0070429	FBtr0070429_540	-1.7286	uORF	em02
FBtr0070429	FBtr0070429_566	-0.451577	uORF	em02
FBtr0070429	FBtr0070429_628	-2.08114	uORF	em02
FBtr0070429	FBtr0070429_678	-1.49911	uORF	em02
FBtr0070432	FBtr0070432_326	1.50773	uORF	em02
FBtr0070432	FBtr0070432_372	0.64528	uORF	em02
FBtr0070432	FBtr0070432_388	2.06028	uORF	em02
FBtr0070433	FBtr0070433_26	3.62318	uORF	em02
FBtr0070433	FBtr0070433_62	0.18584	uORF	em02
FBtr0070439	FBtr0070439_1002	0.875589	uORF	em02
FBtr0070439	FBtr0070439_1007	1.13295	uORF	em02
FBtr0070439	FBtr0070439_1041	0.623245	uORF	em02
FBtr0070439	FBtr0070439_124	2.97403	uORF	em02
FBtr0070439	FBtr0070439_135	2.42861	uORF	em02
FBtr0070439	FBtr0070439_607	0.188698	uORF	em02
FBtr0070439	FBtr0070439_993	1.14224	uORF	em02
FBtr0070442	FBtr0070442_271	4	uORF	em02
FBtr0070442	FBtr0070442_294	4	uORF	em02
FBtr0070442	FBtr0070442_320	-3.53866	uORF	em02
FBtr0070445	FBtr0070445_96	0.694007	uORF	em02
FBtr0070447	FBtr0070447_85	2.95286	uORF	em02
FBtr0070447	FBtr0070447_9	0.0748632	uORF	em02
FBtr0070448	FBtr0070448_180	1.37597	uORF	em02
FBtr0070479	FBtr0070479_83	0.807568	uORF	em02
FBtr0070495	FBtr0070495_118	0.315502	uORF	em02
FBtr0070495	FBtr0070495_92	0.329779	uORF	em02
FBtr0070507	FBtr0070507_184	0.379808	uORF	em02
FBtr0070507	FBtr0070507_189	0.989939	uORF	em02
FBtr0070507	FBtr0070507_194	-0.901367	uORF	em02
FBtr0070507	FBtr0070507_203	-0.87162	uORF	em02
FBtr0070507	FBtr0070507_510	0.234223	uORF	em02
FBtr0070507	FBtr0070507_527	0.759325	uORF	em02
FBtr0070508	FBtr0070508_309	-1.09564	uORF	em02
FBtr0070509	FBtr0070509_13	0.18584	uORF	em02
FBtr0070525	FBtr0070525_554	0.000512424	uORF	em02
FBtr0070559	FBtr0070559_110	4	uORF	em02
FBtr0070559	FBtr0070559_223	-1.39909	uORF	em02
FBtr0070559	FBtr0070559_245	-1.98399	uORF	em02
FBtr0070559	FBtr0070559_272	4	uORF	em02
FBtr0070562	FBtr0070562_260	2.18576	uORF	em02
FBtr0070562	FBtr0070562_334	2.04349	uORF	em02
FBtr0070568	FBtr0070568_35	0.333353	uORF	em02
FBtr0070569	FBtr0070569_175	0.600936	uORF	em02
FBtr0070569	FBtr0070569_40	2.02654	uORF	em02
FBtr0070583	FBtr0070583_332	4	uORF	em02
FBtr0070583	FBtr0070583_398	4	uORF	em02
FBtr0070583	FBtr0070583_409	-0.012133	uORF	em02
FBtr0070586	FBtr0070586_88	0.109035	uORF	em02
FBtr0070611	FBtr0070611_44	2.74851	uORF	em02
FBtr0070616	FBtr0070616_241	1.01807	uORF	em02
FBtr0070625	FBtr0070625_303	-0.278796	uORF	em02
FBtr0070625	FBtr0070625_31	-3.51151	uORF	em02
FBtr0070625	FBtr0070625_85	-1.84168	uORF	em02
FBtr0070626	FBtr0070626_335	1.24474	uORF	em02
FBtr0070626	FBtr0070626_342	2.4082	uORF	em02
FBtr0070626	FBtr0070626_353	1.10338	uORF	em02
FBtr0070626	FBtr0070626_380	0.661917	uORF	em02
FBtr0070627	FBtr0070627_129	-1.38925	uORF	em02
FBtr0070627	FBtr0070627_135	-1.29524	uORF	em02
FBtr0070643	FBtr0070643_166	1.70041	uORF	em02
FBtr0070643	FBtr0070643_293	-0.299536	uORF	em02
FBtr0070643	FBtr0070643_549	0.401369	uORF	em02
FBtr0070643	FBtr0070643_576	-0.229166	uORF	em02
FBtr0070643	FBtr0070643_58	-0.340193	uORF	em02
FBtr0070650	FBtr0070650_568	-1.28324	uORF	em02
FBtr0070650	FBtr0070650_679	4	uORF	em02
FBtr0070650	FBtr0070650_695	-1.10317	uORF	em02
FBtr0070650	FBtr0070650_763	2.30131	uORF	em02
FBtr0070650	FBtr0070650_876	-2.52194	uORF	em02
FBtr0070652	FBtr0070652_125	1.21887	uORF	em02
FBtr0070668	FBtr0070668_152	-0.399106	uORF	em02
FBtr0070668	FBtr0070668_197	-2.0365	uORF	em02
FBtr0070668	FBtr0070668_410	-0.435631	uORF	em02
FBtr0070668	FBtr0070668_510	-0.498641	uORF	em02
FBtr0070671	FBtr0070671_129	4	uORF	em02
FBtr0070671	FBtr0070671_68	1.27717	uORF	em02
FBtr0070683	FBtr0070683_27	-2.81405	uORF	em02
FBtr0070685	FBtr0070685_109	0.961034	uORF	em02
FBtr0070685	FBtr0070685_195	1.71701	uORF	em02
FBtr0070685	FBtr0070685_272	2.08983	uORF	em02
FBtr0070685	FBtr0070685_407	0.15344	uORF	em02
FBtr0070685	FBtr0070685_619	-0.00633836	uORF	em02
FBtr0070686	FBtr0070686_17	-1.1153	uORF	em02
FBtr0070701	FBtr0070701_359	-0.321112	uORF	em02
FBtr0070701	FBtr0070701_88	-1.78293	uORF	em02
FBtr0070723	FBtr0070723_288	-0.428241	uORF	em02
FBtr0070723	FBtr0070723_336	1.12982	uORF	em02
FBtr0070723	FBtr0070723_376	-0.11475	uORF	em02
FBtr0070723	FBtr0070723_433	2.11045	uORF	em02
FBtr0070724	FBtr0070724_123	-0.619663	uORF	em02
FBtr0070724	FBtr0070724_144	-1.72657	uORF	em02
FBtr0070724	FBtr0070724_150	-1.65474	uORF	em02
FBtr0070724	FBtr0070724_168	-0.498634	uORF	em02
FBtr0070724	FBtr0070724_174	-0.522904	uORF	em02
FBtr0070724	FBtr0070724_195	-0.0709141	uORF	em02
FBtr0070724	FBtr0070724_41	0.908677	uORF	em02
FBtr0070724	FBtr0070724_57	1.08381	uORF	em02
FBtr0070738	FBtr0070738_583	3.14515	uORF	em02
FBtr0070738	FBtr0070738_622	4	uORF	em02
FBtr0070756	FBtr0070756_74	0.475385	uORF	em02
FBtr0070763	FBtr0070763_102	-2.88032	uORF	em02
FBtr0070763	FBtr0070763_213	0.2254	uORF	em02
FBtr0070764	FBtr0070764_84	4	uORF	em02
FBtr0070772	FBtr0070772_102	-1.45616	uORF	em02
FBtr0070772	FBtr0070772_89	-1.33884	uORF	em02
FBtr0070780	FBtr0070780_35	0.18584	uORF	em02
FBtr0070782	FBtr0070782_42	4	uORF	em02
FBtr0070798	FBtr0070798_36	0.446384	uORF	em02
FBtr0070804	FBtr0070804_460	1.92283	uORF	em02
FBtr0070807	FBtr0070807_68	-1.36256	uORF	em02
FBtr0070827	FBtr0070827_15	-0.510455	uORF	em02
FBtr0070827	FBtr0070827_78	-0.562591	uORF	em02
FBtr0070828	FBtr0070828_149	2.06026	uORF	em02
FBtr0070841	FBtr0070841_119	-0.0329815	uORF	em02
FBtr0070841	FBtr0070841_156	-1.24708	uORF	em02
FBtr0070841	FBtr0070841_284	1.29298	uORF	em02
FBtr0070843	FBtr0070843_127	-0.161596	uORF	em02
FBtr0070847	FBtr0070847_52	1.40818	uORF	em02
FBtr0070865	FBtr0070865_201	3.68828	uORF	em02
FBtr0070865	FBtr0070865_215	3.71632	uORF	em02
FBtr0070874	FBtr0070874_120	1.03386	uORF	em02
FBtr0070874	FBtr0070874_251	3.33472	uORF	em02
FBtr0070874	FBtr0070874_268	-0.412168	uORF	em02
FBtr0070877	FBtr0070877_18	1.34686	uORF	em02
FBtr0070889	FBtr0070889_154	2.33782	uORF	em02
FBtr0070889	FBtr0070889_57	4	uORF	em02
FBtr0070890	FBtr0070890_282	4	uORF	em02
FBtr0070894	FBtr0070894_35	1.84665	uORF	em02
FBtr0070899	FBtr0070899_16	2.30131	uORF	em02
FBtr0070912	FBtr0070912_113	0.0446514	uORF	em02
FBtr0070914	FBtr0070914_168	0.586396	uORF	em02
FBtr0070914	FBtr0070914_353	-1.99999	uORF	em02
FBtr0070914	FBtr0070914_359	-2.06238	uORF	em02
FBtr0070914	FBtr0070914_365	-1.9785	uORF	em02
FBtr0070914	FBtr0070914_371	-1.92634	uORF	em02
FBtr0070914	FBtr0070914_377	-2.19314	uORF	em02
FBtr0070914	FBtr0070914_71	0.40253	uORF	em02
FBtr0070918	FBtr0070918_47	-0.449247	uORF	em02
FBtr0070918	FBtr0070918_66	-0.696711	uORF	em02
FBtr0070921	FBtr0070921_24	-0.933424	uORF	em02
FBtr0070922	FBtr0070922_9	-2.18462	uORF	em02
FBtr0070924	FBtr0070924_54	1.60406	uORF	em02
FBtr0070925	FBtr0070925_44	3.47121	uORF	em02
FBtr0070930	FBtr0070930_113	-2.47643	uORF	em02
FBtr0070930	FBtr0070930_169	-2.11659	uORF	em02
FBtr0070930	FBtr0070930_23	-0.444843	uORF	em02
FBtr0070937	FBtr0070937_246	1.14911	uORF	em02
FBtr0070948	FBtr0070948_32	-0.710337	uORF	em02
FBtr0070948	FBtr0070948_594	-3.58667	uORF	em02
FBtr0070950	FBtr0070950_106	-0.4642	uORF	em02
FBtr0070950	FBtr0070950_159	-1.15295	uORF	em02
FBtr0070950	FBtr0070950_242	0.251943	uORF	em02
FBtr0070950	FBtr0070950_416	-2.6088	uORF	em02
FBtr0070956	FBtr0070956_490	0.486417	uORF	em02
FBtr0070959	FBtr0070959_1093	-0.773494	uORF	em02
FBtr0070959	FBtr0070959_1102	-0.62149	uORF	em02
FBtr0070959	FBtr0070959_396	0.355728	uORF	em02
FBtr0070959	FBtr0070959_417	0.548374	uORF	em02
FBtr0070959	FBtr0070959_453	1.36539	uORF	em02
FBtr0070959	FBtr0070959_47	-0.0324004	uORF	em02
FBtr0070972	FBtr0070972_113	-0.636135	uORF	em02
FBtr0070972	FBtr0070972_90	1.10339	uORF	em02
FBtr0070974	FBtr0070974_50	0.832749	uORF	em02
FBtr0070974	FBtr0070974_54	1.14842	uORF	em02
FBtr0070987	FBtr0070987_14	-1.8802	uORF	em02
FBtr0070988	FBtr0070988_110	0.569463	uORF	em02
FBtr0070988	FBtr0070988_159	3.07864	uORF	em02
FBtr0070988	FBtr0070988_241	0.834159	uORF	em02
FBtr0070988	FBtr0070988_25	0.228929	uORF	em02
FBtr0070988	FBtr0070988_264	-0.1453	uORF	em02
FBtr0070988	FBtr0070988_416	-0.574673	uORF	em02
FBtr0070988	FBtr0070988_436	-0.114659	uORF	em02
FBtr0070988	FBtr0070988_45	-0.0105403	uORF	em02
FBtr0070988	FBtr0070988_518	1.31751	uORF	em02
FBtr0070988	FBtr0070988_541	0.296598	uORF	em02
FBtr0070988	FBtr0070988_582	-0.0277785	uORF	em02
FBtr0070988	FBtr0070988_628	-0.065737	uORF	em02
FBtr0070988	FBtr0070988_854	0.970126	uORF	em02
FBtr0070992	FBtr0070992_52	0.691195	uORF	em02
FBtr0070994	FBtr0070994_109	-2.29154	uORF	em02
FBtr0071005	FBtr0071005_300	0.651936	uORF	em02
FBtr0071007	FBtr0071007_71	-1.29956	uORF	em02
FBtr0071015	FBtr0071015_160	-1.72493	uORF	em02
FBtr0071015	FBtr0071015_43	-1.01316	uORF	em02
FBtr0071017	FBtr0071017_200	2.46805	uORF	em02
FBtr0071017	FBtr0071017_83	-1.30207	uORF	em02
FBtr0071020	FBtr0071020_66	1.23727	uORF	em02
FBtr0071036	FBtr0071036_313	3.15108	uORF	em02
FBtr0071036	FBtr0071036_410	3.34112	uORF	em02
FBtr0071036	FBtr0071036_501	3.65531	uORF	em02
FBtr0071039	FBtr0071039_4	0.993203	uORF	em02
FBtr0071042	FBtr0071042_46	1.06033	uORF	em02
FBtr0071042	FBtr0071042_51	-1.61821	uORF	em02
FBtr0071042	FBtr0071042_78	-1.14846	uORF	em02
FBtr0071048	FBtr0071048_270	0.77087	uORF	em02
FBtr0071048	FBtr0071048_331	1.23023	uORF	em02
FBtr0071048	FBtr0071048_49	0.448902	uORF	em02
FBtr0071049	FBtr0071049_126	-0.0840618	uORF	em02
FBtr0071049	FBtr0071049_129	0.626423	uORF	em02
FBtr0071049	FBtr0071049_134	0.193829	uORF	em02
FBtr0071049	FBtr0071049_143	0.180015	uORF	em02
FBtr0071049	FBtr0071049_160	1.79818	uORF	em02
FBtr0071049	FBtr0071049_198	0.679842	uORF	em02
FBtr0071066	FBtr0071066_442	-0.500925	uORF	em02
FBtr0071066	FBtr0071066_475	0.032838	uORF	em02
FBtr0071066	FBtr0071066_480	0.103569	uORF	em02
FBtr0071066	FBtr0071066_58	-1.2377	uORF	em02
FBtr0071066	FBtr0071066_590	-0.0186148	uORF	em02
FBtr0071071	FBtr0071071_351	0.000828381	uORF	em02
FBtr0071076	FBtr0071076_75	0.244583	uORF	em02
FBtr0071079	FBtr0071079_223	-1.39911	uORF	em02
FBtr0071079	FBtr0071079_87	-0.00677763	uORF	em02
FBtr0071089	FBtr0071089_57	1.82724	uORF	em02
FBtr0071092	FBtr0071092_100	-0.668929	uORF	em02
FBtr0071092	FBtr0071092_113	2.40607	uORF	em02
FBtr0071092	FBtr0071092_300	-0.382197	uORF	em02
FBtr0071092	FBtr0071092_668	1.21562	uORF	em02
FBtr0071092	FBtr0071092_686	4	uORF	em02
FBtr0071092	FBtr0071092_95	0.738446	uORF	em02
FBtr0071093	FBtr0071093_109	0.375494	uORF	em02
FBtr0071109	FBtr0071109_1024	-1.41197	uORF	em02
FBtr0071109	FBtr0071109_106	2.4316	uORF	em02
FBtr0071109	FBtr0071109_135	1.40442	uORF	em02
FBtr0071109	FBtr0071109_725	-2.6792	uORF	em02
FBtr0071109	FBtr0071109_852	-0.414205	uORF	em02
FBtr0071109	FBtr0071109_888	-0.838282	uORF	em02
FBtr0071112	FBtr0071112_117	-0.875754	uORF	em02
FBtr0071112	FBtr0071112_148	-2.69742	uORF	em02
FBtr0071112	FBtr0071112_335	-0.265024	uORF	em02
FBtr0071112	FBtr0071112_393	-0.722734	uORF	em02
FBtr0071112	FBtr0071112_8	0.403982	uORF	em02
FBtr0071117	FBtr0071117_165	2.36287	uORF	em02
FBtr0071117	FBtr0071117_29	4	uORF	em02
FBtr0071117	FBtr0071117_68	0.337863	uORF	em02
FBtr0071125	FBtr0071125_20	-1.15116	uORF	em02
FBtr0071125	FBtr0071125_365	0.421936	uORF	em02
FBtr0071125	FBtr0071125_395	-2.15991	uORF	em02
FBtr0071132	FBtr0071132_33	2.39395	uORF	em02
FBtr0071132	FBtr0071132_409	-1.15687	uORF	em02
FBtr0071140	FBtr0071140_41	0.906912	uORF	em02
FBtr0071142	FBtr0071142_14	3.19469	uORF	em02
FBtr0071151	FBtr0071151_55	4	uORF	em02
FBtr0071152	FBtr0071152_97	0.823333	uORF	em02
FBtr0071153	FBtr0071153_76	0.922855	uORF	em02
FBtr0071157	FBtr0071157_20	4	uORF	em02
FBtr0071174	FBtr0071174_328	-0.458713	uORF	em02
FBtr0071174	FBtr0071174_49	0.847429	uORF	em02
FBtr0071174	FBtr0071174_80	0.126968	uORF	em02
FBtr0071174	FBtr0071174_89	-0.408812	uORF	em02
FBtr0071175	FBtr0071175_155	-1.26981	uORF	em02
FBtr0071175	FBtr0071175_285	0.786781	uORF	em02
FBtr0071183	FBtr0071183_31	-0.657974	uORF	em02
FBtr0071183	FBtr0071183_4	-0.657974	uORF	em02
FBtr0071188	FBtr0071188_48	0.496943	uORF	em02
FBtr0071192	FBtr0071192_481	-0.669738	uORF	em02
FBtr0071212	FBtr0071212_261	0.200408	uORF	em02
FBtr0071219	FBtr0071219_345	0.546261	uORF	em02
FBtr0071219	FBtr0071219_348	0.815908	uORF	em02
FBtr0071221	FBtr0071221_98	-1.8142	uORF	em02
FBtr0071222	FBtr0071222_137	-1.27942	uORF	em02
FBtr0071222	FBtr0071222_168	0.469108	uORF	em02
FBtr0071222	FBtr0071222_192	-1.24708	uORF	em02
FBtr0071223	FBtr0071223_126	-0.688601	uORF	em02
FBtr0071223	FBtr0071223_83	-1.01005	uORF	em02
FBtr0071233	FBtr0071233_57	-0.362558	uORF	em02
FBtr0071233	FBtr0071233_60	-0.4938	uORF	em02
FBtr0071237	FBtr0071237_74	4	uORF	em02
FBtr0071246	FBtr0071246_242	1.35659	uORF	em02
FBtr0071246	FBtr0071246_298	0.293387	uORF	em02
FBtr0071246	FBtr0071246_52	1.36339	uORF	em02
FBtr0071279	FBtr0071279_449	0.922757	uORF	em02
FBtr0071284	FBtr0071284_41	-1.59837	uORF	em02
FBtr0071284	FBtr0071284_86	-1.13607	uORF	em02
FBtr0071287	FBtr0071287_68	4	uORF	em02
FBtr0071299	FBtr0071299_199	-1.07963	uORF	em02
FBtr0071300	FBtr0071300_44	2.46249	uORF	em02
FBtr0071314	FBtr0071314_236	0.963451	uORF	em02
FBtr0071319	FBtr0071319_83	0.716374	uORF	em02
FBtr0071332	FBtr0071332_230	-1.12772	uORF	em02
FBtr0071332	FBtr0071332_70	2.40642	uORF	em02
FBtr0071349	FBtr0071349_352	-0.927572	uORF	em02
FBtr0071349	FBtr0071349_502	-0.0847864	uORF	em02
FBtr0071349	FBtr0071349_525	-0.842157	uORF	em02
FBtr0071361	FBtr0071361_136	1.18341	uORF	em02
FBtr0071363	FBtr0071363_45	-1.83255	uORF	em02
FBtr0071363	FBtr0071363_52	-1.6059	uORF	em02
FBtr0071367	FBtr0071367_240	1.25022	uORF	em02
FBtr0071367	FBtr0071367_247	1.76495	uORF	em02
FBtr0071367	FBtr0071367_265	2.25617	uORF	em02
FBtr0071368	FBtr0071368_37	1.28842	uORF	em02
FBtr0071371	FBtr0071371_8	3.12441	uORF	em02
FBtr0071379	FBtr0071379_370	1.0159	uORF	em02
FBtr0071393	FBtr0071393_27	-0.621501	uORF	em02
FBtr0071405	FBtr0071405_169	0.633343	uORF	em02
FBtr0071405	FBtr0071405_76	1.52854	uORF	em02
FBtr0071430	FBtr0071430_74	-0.851595	uORF	em02
FBtr0071444	FBtr0071444_117	-1.10207	uORF	em02
FBtr0071444	FBtr0071444_57	-1.06506	uORF	em02
FBtr0071450	FBtr0071450_250	-0.671774	uORF	em02
FBtr0071450	FBtr0071450_305	0.651527	uORF	em02
FBtr0071460	FBtr0071460_312	1.10339	uORF	em02
FBtr0071460	FBtr0071460_52	-1.87363	uORF	em02
FBtr0071460	FBtr0071460_575	-0.495411	uORF	em02
FBtr0071465	FBtr0071465_3	0.385179	uORF	em02
FBtr0071487	FBtr0071487_34	-0.754201	uORF	em02
FBtr0071487	FBtr0071487_363	-0.298	uORF	em02
FBtr0071491	FBtr0071491_55	1.92277	uORF	em02
FBtr0071497	FBtr0071497_78	-1.90296	uORF	em02
FBtr0071503	FBtr0071503_16	-3.66114	uORF	em02
FBtr0071522	FBtr0071522_31	0.76281	uORF	em02
FBtr0071526	FBtr0071526_55	-0.847519	uORF	em02
FBtr0071546	FBtr0071546_266	1.05895	uORF	em02
FBtr0071546	FBtr0071546_504	0.668229	uORF	em02
FBtr0071546	FBtr0071546_510	0.549719	uORF	em02
FBtr0071546	FBtr0071546_702	0.450059	uORF	em02
FBtr0071548	FBtr0071548_31	0.688352	uORF	em02
FBtr0071548	FBtr0071548_37	1.44476	uORF	em02
FBtr0071548	FBtr0071548_70	0.185865	uORF	em02
FBtr0071562	FBtr0071562_249	2.9227	uORF	em02
FBtr0071563	FBtr0071563_183	0.852328	uORF	em02
FBtr0071563	FBtr0071563_190	-0.289326	uORF	em02
FBtr0071563	FBtr0071563_203	-0.187081	uORF	em02
FBtr0071563	FBtr0071563_329	-0.546393	uORF	em02
FBtr0071573	FBtr0071573_71	1.39821	uORF	em02
FBtr0071575	FBtr0071575_12	-0.07716	uORF	em02
FBtr0071590	FBtr0071590_125	2.48622	uORF	em02
FBtr0071590	FBtr0071590_61	0.823283	uORF	em02
FBtr0071600	FBtr0071600_39	-2.94862	uORF	em02
FBtr0071606	FBtr0071606_134	-1.73615	uORF	em02
FBtr0071606	FBtr0071606_165	4	uORF	em02
FBtr0071609	FBtr0071609_55	0.536356	uORF	em02
FBtr0071609	FBtr0071609_61	0.311392	uORF	em02
FBtr0071610	FBtr0071610_264	1.92274	uORF	em02
FBtr0071610	FBtr0071610_339	3.04342	uORF	em02
FBtr0071610	FBtr0071610_429	4	uORF	em02
FBtr0071610	FBtr0071610_508	3.27323	uORF	em02
FBtr0071610	FBtr0071610_562	3.50766	uORF	em02
FBtr0071610	FBtr0071610_568	1.40815	uORF	em02
FBtr0071610	FBtr0071610_580	4	uORF	em02
FBtr0071610	FBtr0071610_586	4	uORF	em02
FBtr0071610	FBtr0071610_598	4	uORF	em02
FBtr0071610	FBtr0071610_628	3.36533	uORF	em02
FBtr0071610	FBtr0071610_758	4	uORF	em02
FBtr0071610	FBtr0071610_841	2.94067	uORF	em02
FBtr0071610	FBtr0071610_856	2.40817	uORF	em02
FBtr0071613	FBtr0071613_125	-0.439484	uORF	em02
FBtr0071613	FBtr0071613_26	-0.160941	uORF	em02
FBtr0071613	FBtr0071613_76	0.117186	uORF	em02
FBtr0071615	FBtr0071615_132	2.58971	uORF	em02
FBtr0071615	FBtr0071615_88	2.99167	uORF	em02
FBtr0071636	FBtr0071636_359	1.32335	uORF	em02
FBtr0071636	FBtr0071636_371	-0.791416	uORF	em02
FBtr0071636	FBtr0071636_538	0.0662696	uORF	em02
FBtr0071636	FBtr0071636_544	0.085833	uORF	em02
FBtr0071636	FBtr0071636_607	0.339697	uORF	em02
FBtr0071636	FBtr0071636_738	-1.98741	uORF	em02
FBtr0071636	FBtr0071636_749	-2.13603	uORF	em02
FBtr0071636	FBtr0071636_777	0.078946	uORF	em02
FBtr0071636	FBtr0071636_877	0.0703843	uORF	em02
FBtr0071636	FBtr0071636_882	0.0456695	uORF	em02
FBtr0071637	FBtr0071637_152	2.29601	uORF	em02
FBtr0071637	FBtr0071637_191	1.89856	uORF	em02
FBtr0071637	FBtr0071637_70	2.82327	uORF	em02
FBtr0071637	FBtr0071637_87	1.87122	uORF	em02
FBtr0071637	FBtr0071637_92	2.83053	uORF	em02
FBtr0071641	FBtr0071641_141	2.03437	uORF	em02
FBtr0071654	FBtr0071654_284	0.60089	uORF	em02
FBtr0071654	FBtr0071654_287	0.770812	uORF	em02
FBtr0071654	FBtr0071654_507	4	uORF	em02
FBtr0071654	FBtr0071654_540	4	uORF	em02
FBtr0071654	FBtr0071654_850	0.564361	uORF	em02
FBtr0071661	FBtr0071661_169	1.10235	uORF	em02
FBtr0071661	FBtr0071661_221	2.79465	uORF	em02
FBtr0071661	FBtr0071661_232	2.08631	uORF	em02
FBtr0071661	FBtr0071661_99	-1.19746	uORF	em02
FBtr0071672	FBtr0071672_80	-0.98405	uORF	em02
FBtr0071679	FBtr0071679_100	0.524564	uORF	em02
FBtr0071686	FBtr0071686_125	-0.850451	uORF	em02
FBtr0071686	FBtr0071686_27	2.32881	uORF	em02
FBtr0071686	FBtr0071686_44	1.52372	uORF	em02
FBtr0071686	FBtr0071686_74	-0.28958	uORF	em02
FBtr0071688	FBtr0071688_52	2.39144	uORF	em02
FBtr0071688	FBtr0071688_7	1.97638	uORF	em02
FBtr0071688	FBtr0071688_88	1.60087	uORF	em02
FBtr0071700	FBtr0071700_33	4	uORF	em02
FBtr0071755	FBtr0071755_183	2.30184	uORF	em02
FBtr0071755	FBtr0071755_73	1.51075	uORF	em02
FBtr0071756	FBtr0071756_31	4	uORF	em02
FBtr0071758	FBtr0071758_18	-1.56158	uORF	em02
FBtr0071758	FBtr0071758_6	-1.56158	uORF	em02
FBtr0071761	FBtr0071761_169	1.43961	uORF	em02
FBtr0071761	FBtr0071761_52	0.62035	uORF	em02
FBtr0071763	FBtr0071763_160	1.92278	uORF	em02
FBtr0071763	FBtr0071763_165	-0.435623	uORF	em02
FBtr0071763	FBtr0071763_366	0.422895	uORF	em02
FBtr0071774	FBtr0071774_147	1.12067	uORF	em02
FBtr0071774	FBtr0071774_255	-0.787117	uORF	em02
FBtr0071774	FBtr0071774_259	-1.14018	uORF	em02
FBtr0071774	FBtr0071774_48	0.834516	uORF	em02
FBtr0071775	FBtr0071775_31	4	uORF	em02
FBtr0071775	FBtr0071775_639	-1.84173	uORF	em02
FBtr0071777	FBtr0071777_142	1.1858	uORF	em02
FBtr0071787	FBtr0071787_28	3.47528	uORF	em02
FBtr0071800	FBtr0071800_58	-0.758562	uORF	em02
FBtr0071832	FBtr0071832_16	-1.98403	uORF	em02
FBtr0071838	FBtr0071838_203	-0.036507	uORF	em02
FBtr0071838	FBtr0071838_232	-3.3391	uORF	em02
FBtr0071838	FBtr0071838_248	0.881006	uORF	em02
FBtr0071838	FBtr0071838_389	0.890417	uORF	em02
FBtr0071838	FBtr0071838_491	1.18586	uORF	em02
FBtr0071843	FBtr0071843_5	4	uORF	em02
FBtr0071845	FBtr0071845_126	4	uORF	em02
FBtr0071868	FBtr0071868_1	0.0350367	uORF	em02
FBtr0071868	FBtr0071868_7	0.0350367	uORF	em02
FBtr0071868	FBtr0071868_89	0.644822	uORF	em02
FBtr0071903	FBtr0071903_49	1.78672	uORF	em02
FBtr0071903	FBtr0071903_63	4	uORF	em02
FBtr0071907	FBtr0071907_47	2.17278	uORF	em02
FBtr0071936	FBtr0071936_100	1.00491	uORF	em02
FBtr0071951	FBtr0071951_138	-0.311652	uORF	em02
FBtr0071953	FBtr0071953_111	-0.192689	uORF	em02
FBtr0071953	FBtr0071953_160	4	uORF	em02
FBtr0071953	FBtr0071953_197	0.8627	uORF	em02
FBtr0071953	FBtr0071953_78	-0.192689	uORF	em02
FBtr0071963	FBtr0071963_16	-3.4855	uORF	em02
FBtr0071963	FBtr0071963_77	-2.58291	uORF	em02
FBtr0071994	FBtr0071994_249	1.38748	uORF	em02
FBtr0071994	FBtr0071994_71	0.18584	uORF	em02
FBtr0071994	FBtr0071994_89	0.507771	uORF	em02
FBtr0072010	FBtr0072010_145	1.87675	uORF	em02
FBtr0072010	FBtr0072010_18	-2.06729	uORF	em02
FBtr0072010	FBtr0072010_92	0.350354	uORF	em02
FBtr0072027	FBtr0072027_150	-3.52833	uORF	em02
FBtr0072027	FBtr0072027_155	-0.536616	uORF	em02
FBtr0072036	FBtr0072036_53	0.523722	uORF	em02
FBtr0072038	FBtr0072038_169	2.93971	uORF	em02
FBtr0072058	FBtr0072058_115	-1.67594	uORF	em02
FBtr0072058	FBtr0072058_193	0.837311	uORF	em02
FBtr0072058	FBtr0072058_322	-0.249219	uORF	em02
FBtr0072058	FBtr0072058_36	0.248317	uORF	em02
FBtr0072065	FBtr0072065_45	-0.591768	uORF	em02
FBtr0072073	FBtr0072073_249	0.172161	uORF	em02
FBtr0072073	FBtr0072073_370	-0.987445	uORF	em02
FBtr0072073	FBtr0072073_387	-0.319221	uORF	em02
FBtr0072073	FBtr0072073_66	-0.698382	uORF	em02
FBtr0072073	FBtr0072073_99	-0.948673	uORF	em02
FBtr0072083	FBtr0072083_94	-0.492235	uORF	em02
FBtr0072084	FBtr0072084_45	3.74382	uORF	em02
FBtr0072085	FBtr0072085_67	0.450699	uORF	em02
FBtr0072087	FBtr0072087_379	2.54277	uORF	em02
FBtr0072087	FBtr0072087_423	-3.12046	uORF	em02
FBtr0072087	FBtr0072087_517	-0.855791	uORF	em02
FBtr0072087	FBtr0072087_561	-1.87908	uORF	em02
FBtr0072097	FBtr0072097_145	0.209448	uORF	em02
FBtr0072097	FBtr0072097_85	-0.0392043	uORF	em02
FBtr0072099	FBtr0072099_107	0.723488	uORF	em02
FBtr0072099	FBtr0072099_19	3.97806	uORF	em02
FBtr0072112	FBtr0072112_10	3.93307	uORF	em02
FBtr0072112	FBtr0072112_31	4	uORF	em02
FBtr0072120	FBtr0072120_316	0.0263323	uORF	em02
FBtr0072127	FBtr0072127_102	2.28056	uORF	em02
FBtr0072129	FBtr0072129_263	0.611137	uORF	em02
FBtr0072129	FBtr0072129_449	-0.176721	uORF	em02
FBtr0072129	FBtr0072129_456	0.206545	uORF	em02
FBtr0072129	FBtr0072129_497	-2.27622	uORF	em02
FBtr0072133	FBtr0072133_43	0.716421	uORF	em02
FBtr0072133	FBtr0072133_85	-0.939615	uORF	em02
FBtr0072133	FBtr0072133_98	0.233207	uORF	em02
FBtr0072134	FBtr0072134_50	0.145204	uORF	em02
FBtr0072134	FBtr0072134_90	4	uORF	em02
FBtr0072143	FBtr0072143_261	2.46659	uORF	em02
FBtr0072143	FBtr0072143_271	2.36641	uORF	em02
FBtr0072145	FBtr0072145_140	1.8639	uORF	em02
FBtr0072145	FBtr0072145_147	0.18585	uORF	em02
FBtr0072145	FBtr0072145_176	3.35571	uORF	em02
FBtr0072154	FBtr0072154_111	-1.11334	uORF	em02
FBtr0072154	FBtr0072154_143	1.12137	uORF	em02
FBtr0072154	FBtr0072154_192	-1.69337	uORF	em02
FBtr0072154	FBtr0072154_54	-0.3991	uORF	em02
FBtr0072156	FBtr0072156_43	-0.453543	uORF	em02
FBtr0072157	FBtr0072157_155	1.40819	uORF	em02
FBtr0072157	FBtr0072157_305	4	uORF	em02
FBtr0072157	FBtr0072157_512	0.185837	uORF	em02
FBtr0072157	FBtr0072157_651	3.99309	uORF	em02
FBtr0072157	FBtr0072157_837	0.0338576	uORF	em02
FBtr0072162	FBtr0072162_165	-3.42654	uORF	em02
FBtr0072162	FBtr0072162_177	-3.42654	uORF	em02
FBtr0072162	FBtr0072162_98	1.47535	uORF	em02
FBtr0072163	FBtr0072163_64	-0.51855	uORF	em02
FBtr0072166	FBtr0072166_127	1.31869	uORF	em02
FBtr0072166	FBtr0072166_166	1.34048	uORF	em02
FBtr0072166	FBtr0072166_47	0.018763	uORF	em02
FBtr0072166	FBtr0072166_80	-0.0798883	uORF	em02
FBtr0072168	FBtr0072168_56	3.27326	uORF	em02
FBtr0072168	FBtr0072168_83	1.14931	uORF	em02
FBtr0072177	FBtr0072177_139	0.161405	uORF	em02
FBtr0072177	FBtr0072177_243	0.650844	uORF	em02
FBtr0072195	FBtr0072195_126	2.30127	uORF	em02
FBtr0072195	FBtr0072195_76	2.43376	uORF	em02
FBtr0072195	FBtr0072195_81	0.716356	uORF	em02
FBtr0072204	FBtr0072204_169	-0.779518	uORF	em02
FBtr0072204	FBtr0072204_199	-0.880656	uORF	em02
FBtr0072204	FBtr0072204_245	-0.692157	uORF	em02
FBtr0072204	FBtr0072204_279	-0.267096	uORF	em02
FBtr0072204	FBtr0072204_306	-0.365525	uORF	em02
FBtr0072204	FBtr0072204_36	-0.191319	uORF	em02
FBtr0072205	FBtr0072205_12	-0.851598	uORF	em02
FBtr0072205	FBtr0072205_34	-0.513734	uORF	em02
FBtr0072207	FBtr0072207_141	-1.80606	uORF	em02
FBtr0072207	FBtr0072207_33	0.365182	uORF	em02
FBtr0072207	FBtr0072207_62	0.311391	uORF	em02
FBtr0072208	FBtr0072208_9	4	uORF	em02
FBtr0072210	FBtr0072210_18	0.282328	uORF	em02
FBtr0072220	FBtr0072220_24	-1.16205	uORF	em02
FBtr0072220	FBtr0072220_27	-1.03653	uORF	em02
FBtr0072220	FBtr0072220_62	-1.49862	uORF	em02
FBtr0072221	FBtr0072221_159	-0.28359	uORF	em02
FBtr0072225	FBtr0072225_60	-0.315267	uORF	em02
FBtr0072227	FBtr0072227_145	-2.33259	uORF	em02
FBtr0072227	FBtr0072227_242	-0.621315	uORF	em02
FBtr0072227	FBtr0072227_272	0.875932	uORF	em02
FBtr0072234	FBtr0072234_116	-0.171295	uORF	em02
FBtr0072235	FBtr0072235_26	0.742251	uORF	em02
FBtr0072235	FBtr0072235_32	0.742251	uORF	em02
FBtr0072249	FBtr0072249_111	0.18584	uORF	em02
FBtr0072249	FBtr0072249_82	0.323358	uORF	em02
FBtr0072250	FBtr0072250_58	-1.02771	uORF	em02
FBtr0072250	FBtr0072250_68	-1.23633	uORF	em02
FBtr0072251	FBtr0072251_146	0.688355	uORF	em02
FBtr0072251	FBtr0072251_149	0.688355	uORF	em02
FBtr0072260	FBtr0072260_132	-0.400507	uORF	em02
FBtr0072260	FBtr0072260_212	-0.852103	uORF	em02
FBtr0072260	FBtr0072260_220	-2.04303	uORF	em02
FBtr0072260	FBtr0072260_268	-0.762117	uORF	em02
FBtr0072260	FBtr0072260_27	0.408247	uORF	em02
FBtr0072262	FBtr0072262_187	1.54574	uORF	em02
FBtr0072268	FBtr0072268_75	-1.77461	uORF	em02
FBtr0072280	FBtr0072280_3	1.82321	uORF	em02
FBtr0072281	FBtr0072281_196	4	uORF	em02
FBtr0072281	FBtr0072281_510	-0.136065	uORF	em02
FBtr0072281	FBtr0072281_518	0.0337946	uORF	em02
FBtr0072281	FBtr0072281_574	2.7708	uORF	em02
FBtr0072285	FBtr0072285_209	4	uORF	em02
FBtr0072287	FBtr0072287_81	-0.832514	uORF	em02
FBtr0072302	FBtr0072302_122	-0.98401	uORF	em02
FBtr0072302	FBtr0072302_13	2.52369	uORF	em02
FBtr0072302	FBtr0072302_61	2.50775	uORF	em02
FBtr0072338	FBtr0072338_81	-1.01005	uORF	em02
FBtr0072342	FBtr0072342_43	-0.457997	uORF	em02
FBtr0072347	FBtr0072347_26	2.1707	uORF	em02
FBtr0072364	FBtr0072364_317	-0.548605	uORF	em02
FBtr0072364	FBtr0072364_9	-0.401792	uORF	em02
FBtr0072369	FBtr0072369_207	0.145227	uORF	em02
FBtr0072369	FBtr0072369_454	0.033845	uORF	em02
FBtr0072375	FBtr0072375_65	4	uORF	em02
FBtr0072393	FBtr0072393_32	0.878427	uORF	em02
FBtr0072393	FBtr0072393_498	-1.66209	uORF	em02
FBtr0072396	FBtr0072396_1064	1.40826	uORF	em02
FBtr0072397	FBtr0072397_153	0.35842	uORF	em02
FBtr0072397	FBtr0072397_44	0.1764	uORF	em02
FBtr0072405	FBtr0072405_13	0.0503264	uORF	em02
FBtr0072412	FBtr0072412_10	0.539493	uORF	em02
FBtr0072423	FBtr0072423_186	-1.69675	uORF	em02
FBtr0072423	FBtr0072423_243	1.37027	uORF	em02
FBtr0072427	FBtr0072427_170	4	uORF	em02
FBtr0072435	FBtr0072435_91	0.498155	uORF	em02
FBtr0072449	FBtr0072449_219	3.64817	uORF	em02
FBtr0072464	FBtr0072464_263	1.23385	uORF	em02
FBtr0072464	FBtr0072464_274	1.03733	uORF	em02
FBtr0072480	FBtr0072480_93	-0.399057	uORF	em02
FBtr0072515	FBtr0072515_146	0.319817	uORF	em02
FBtr0072515	FBtr0072515_194	0.434557	uORF	em02
FBtr0072515	FBtr0072515_218	0.44417	uORF	em02
FBtr0072515	FBtr0072515_244	1.08102	uORF	em02
FBtr0072515	FBtr0072515_258	0.228927	uORF	em02
FBtr0072515	FBtr0072515_303	0.362385	uORF	em02
FBtr0072515	FBtr0072515_343	0.665665	uORF	em02
FBtr0072520	FBtr0072520_147	1.16613	uORF	em02
FBtr0072520	FBtr0072520_170	1.51393	uORF	em02
FBtr0072520	FBtr0072520_186	0.382257	uORF	em02
FBtr0072524	FBtr0072524_181	-1.88446	uORF	em02
FBtr0072524	FBtr0072524_264	-1.1361	uORF	em02
FBtr0072529	FBtr0072529_101	0.522119	uORF	em02
FBtr0072532	FBtr0072532_112	-0.913674	uORF	em02
FBtr0072532	FBtr0072532_223	0.0651595	uORF	em02
FBtr0072532	FBtr0072532_515	-0.0196244	uORF	em02
FBtr0072532	FBtr0072532_622	0.811784	uORF	em02
FBtr0072532	FBtr0072532_68	1.40826	uORF	em02
FBtr0072532	FBtr0072532_722	-2.98388	uORF	em02
FBtr0072534	FBtr0072534_148	-0.541341	uORF	em02
FBtr0072548	FBtr0072548_73	2.21562	uORF	em02
FBtr0072548	FBtr0072548_88	2.09278	uORF	em02
FBtr0072551	FBtr0072551_150	-0.591735	uORF	em02
FBtr0072551	FBtr0072551_207	1.82328	uORF	em02
FBtr0072551	FBtr0072551_455	0.0338573	uORF	em02
FBtr0072551	FBtr0072551_508	-0.644232	uORF	em02
FBtr0072556	FBtr0072556_15	4	uORF	em02
FBtr0072556	FBtr0072556_266	-0.830953	uORF	em02
FBtr0072556	FBtr0072556_270	-1.018	uORF	em02
FBtr0072556	FBtr0072556_50	1.10784	uORF	em02
FBtr0072556	FBtr0072556_9	-3.01377	uORF	em02
FBtr0072557	FBtr0072557_60	0.185874	uORF	em02
FBtr0072558	FBtr0072558_1	4	uORF	em02
FBtr0072559	FBtr0072559_7	1.8557	uORF	em02
FBtr0072563	FBtr0072563_48	4	uORF	em02
FBtr0072585	FBtr0072585_112	-0.399084	uORF	em02
FBtr0072585	FBtr0072585_217	-1.39902	uORF	em02
FBtr0072587	FBtr0072587_43	4	uORF	em02
FBtr0072589	FBtr0072589_291	0.513633	uORF	em02
FBtr0072589	FBtr0072589_351	0.912306	uORF	em02
FBtr0072593	FBtr0072593_223	-0.939675	uORF	em02
FBtr0072593	FBtr0072593_234	-1.42766	uORF	em02
FBtr0072593	FBtr0072593_821	0.337881	uORF	em02
FBtr0072596	FBtr0072596_7	0.566679	uORF	em02
FBtr0072597	FBtr0072597_33	0.886253	uORF	em02
FBtr0072597	FBtr0072597_41	1.7684	uORF	em02
FBtr0072597	FBtr0072597_95	1.6752	uORF	em02
FBtr0072602	FBtr0072602_187	1.523	uORF	em02
FBtr0072602	FBtr0072602_63	-2.81405	uORF	em02
FBtr0072607	FBtr0072607_22	0.941645	uORF	em02
FBtr0072607	FBtr0072607_44	2.32509	uORF	em02
FBtr0072610	FBtr0072610_13	0.974078	uORF	em02
FBtr0072611	FBtr0072611_204	-0.496058	uORF	em02
FBtr0072611	FBtr0072611_247	-1.24709	uORF	em02
FBtr0072611	FBtr0072611_96	1.40815	uORF	em02
FBtr0072639	FBtr0072639_178	-0.984049	uORF	em02
FBtr0072639	FBtr0072639_187	-2.98391	uORF	em02
FBtr0072639	FBtr0072639_340	2.30128	uORF	em02
FBtr0072644	FBtr0072644_127	-0.411793	uORF	em02
FBtr0072644	FBtr0072644_133	-0.608615	uORF	em02
FBtr0072644	FBtr0072644_160	-0.804148	uORF	em02
FBtr0072644	FBtr0072644_236	-0.270058	uORF	em02
FBtr0072644	FBtr0072644_66	4	uORF	em02
FBtr0072652	FBtr0072652_48	0.866558	uORF	em02
FBtr0072679	FBtr0072679_125	0.292561	uORF	em02
FBtr0072694	FBtr0072694_198	3.90004	uORF	em02
FBtr0072694	FBtr0072694_237	3.64519	uORF	em02
FBtr0072703	FBtr0072703_60	1.24029	uORF	em02
FBtr0072703	FBtr0072703_66	1.15044	uORF	em02
FBtr0072703	FBtr0072703_74	1.78144	uORF	em02
FBtr0072711	FBtr0072711_59	-0.968794	uORF	em02
FBtr0072723	FBtr0072723_168	4	uORF	em02
FBtr0072723	FBtr0072723_294	4	uORF	em02
FBtr0072723	FBtr0072723_308	2.86758	uORF	em02
FBtr0072723	FBtr0072723_312	-0.26974	uORF	em02
FBtr0072723	FBtr0072723_397	3.43583	uORF	em02
FBtr0072723	FBtr0072723_663	3.82964	uORF	em02
FBtr0072729	FBtr0072729_109	0.355777	uORF	em02
FBtr0072729	FBtr0072729_24	-1.07716	uORF	em02
FBtr0072729	FBtr0072729_31	-2.67589	uORF	em02
FBtr0072735	FBtr0072735_168	-0.623315	uORF	em02
FBtr0072735	FBtr0072735_201	0.185858	uORF	em02
FBtr0072735	FBtr0072735_224	0.142795	uORF	em02
FBtr0072743	FBtr0072743_182	0.145182	uORF	em02
FBtr0072743	FBtr0072743_228	-0.273559	uORF	em02
FBtr0072743	FBtr0072743_242	-0.958451	uORF	em02
FBtr0072743	FBtr0072743_299	-2.38224	uORF	em02
FBtr0072743	FBtr0072743_358	-2.07713	uORF	em02
FBtr0072743	FBtr0072743_475	-1.6141	uORF	em02
FBtr0072747	FBtr0072747_111	2.78291	uORF	em02
FBtr0072747	FBtr0072747_1125	-1.21858	uORF	em02
FBtr0072747	FBtr0072747_1279	4	uORF	em02
FBtr0072747	FBtr0072747_316	1.74878	uORF	em02
FBtr0072747	FBtr0072747_322	0.974349	uORF	em02
FBtr0072747	FBtr0072747_836	0.746306	uORF	em02
FBtr0072747	FBtr0072747_883	3.16312	uORF	em02
FBtr0072754	FBtr0072754_3	-3.74221	uORF	em02
FBtr0072754	FBtr0072754_9	-3.74221	uORF	em02
FBtr0072757	FBtr0072757_3	-3.74221	uORF	em02
FBtr0072757	FBtr0072757_9	-3.74221	uORF	em02
FBtr0072759	FBtr0072759_48	-1.39904	uORF	em02
FBtr0072761	FBtr0072761_42	3.99324	uORF	em02
FBtr0072767	FBtr0072767_121	0.695132	uORF	em02
FBtr0072767	FBtr0072767_128	-0.30561	uORF	em02
FBtr0072767	FBtr0072767_186	-1.03655	uORF	em02
FBtr0072767	FBtr0072767_85	0.389145	uORF	em02
FBtr0072773	FBtr0072773_139	0.14406	uORF	em02
FBtr0072773	FBtr0072773_262	0.52641	uORF	em02
FBtr0072776	FBtr0072776_22	2.38742	uORF	em02
FBtr0072779	FBtr0072779_29	0.800138	uORF	em02
FBtr0072788	FBtr0072788_68	0.359882	uORF	em02
FBtr0072792	FBtr0072792_104	0.904084	uORF	em02
FBtr0072792	FBtr0072792_139	1.68725	uORF	em02
FBtr0072792	FBtr0072792_312	0.103391	uORF	em02
FBtr0072792	FBtr0072792_96	1.96346	uORF	em02
FBtr0072826	FBtr0072826_180	2.60087	uORF	em02
FBtr0072826	FBtr0072826_189	2.60985	uORF	em02
FBtr0072826	FBtr0072826_192	2.33783	uORF	em02
FBtr0072826	FBtr0072826_364	1.4507	uORF	em02
FBtr0072826	FBtr0072826_394	0.902061	uORF	em02
FBtr0072828	FBtr0072828_36	1.58388	uORF	em02
FBtr0072828	FBtr0072828_447	-0.848856	uORF	em02
FBtr0072828	FBtr0072828_461	-1.52369	uORF	em02
FBtr0072831	FBtr0072831_226	0.898847	uORF	em02
FBtr0072834	FBtr0072834_161	-0.899849	uORF	em02
FBtr0072834	FBtr0072834_81	1.29849	uORF	em02
FBtr0072836	FBtr0072836_104	2.40817	uORF	em02
FBtr0072842	FBtr0072842_209	-1.81408	uORF	em02
FBtr0072842	FBtr0072842_228	-2.399	uORF	em02
FBtr0072853	FBtr0072853_197	-0.0793121	uORF	em02
FBtr0072864	FBtr0072864_65	-1.08548	uORF	em02
FBtr0072866	FBtr0072866_45	0.259863	uORF	em02
FBtr0072877	FBtr0072877_101	0.0863319	uORF	em02
FBtr0072901	FBtr0072901_212	0.623929	uORF	em02
FBtr0072904	FBtr0072904_100	-1.08148	uORF	em02
FBtr0072904	FBtr0072904_132	-0.951666	uORF	em02
FBtr0072904	FBtr0072904_68	-1.10019	uORF	em02
FBtr0072905	FBtr0072905_112	-0.593323	uORF	em02
FBtr0072905	FBtr0072905_116	-1.86858	uORF	em02
FBtr0072905	FBtr0072905_149	-0.547096	uORF	em02
FBtr0072905	FBtr0072905_3	0.167832	uORF	em02
FBtr0072913	FBtr0072913_132	1.18593	uORF	em02
FBtr0072913	FBtr0072913_30	-1.21858	uORF	em02
FBtr0072913	FBtr0072913_37	-1.09428	uORF	em02
FBtr0072915	FBtr0072915_21	-2.05555	uORF	em02
FBtr0072915	FBtr0072915_3	-1.78041	uORF	em02
FBtr0072921	FBtr0072921_106	2.29142	uORF	em02
FBtr0072921	FBtr0072921_211	2.14302	uORF	em02
FBtr0072921	FBtr0072921_216	-0.118998	uORF	em02
FBtr0072930	FBtr0072930_84	-0.551145	uORF	em02
FBtr0072931	FBtr0072931_4	0.0733833	uORF	em02
FBtr0072931	FBtr0072931_75	-2.14533	uORF	em02
FBtr0072948	FBtr0072948_61	-2.51975	uORF	em02
FBtr0072955	FBtr0072955_187	0.993205	uORF	em02
FBtr0072955	FBtr0072955_3	-0.662103	uORF	em02
FBtr0072956	FBtr0072956_101	0.324749	uORF	em02
FBtr0072970	FBtr0072970_50	1.15728	uORF	em02
FBtr0072970	FBtr0072970_97	-1.11256	uORF	em02
FBtr0072972	FBtr0072972_268	-0.0297408	uORF	em02
FBtr0072972	FBtr0072972_78	1.49373	uORF	em02
FBtr0072984	FBtr0072984_29	-1.22625	uORF	em02
FBtr0072984	FBtr0072984_73	0.205759	uORF	em02
FBtr0072991	FBtr0072991_211	1.96563	uORF	em02
FBtr0072991	FBtr0072991_276	-0.427114	uORF	em02
FBtr0072991	FBtr0072991_284	0.54396	uORF	em02
FBtr0072991	FBtr0072991_322	-3.66666	uORF	em02
FBtr0072991	FBtr0072991_56	4	uORF	em02
FBtr0072991	FBtr0072991_92	2.4954	uORF	em02
FBtr0073023	FBtr0073023_89	2.23235	uORF	em02
FBtr0073035	FBtr0073035_204	1.28211	uORF	em02
FBtr0073035	FBtr0073035_211	4	uORF	em02
FBtr0073035	FBtr0073035_219	1.59372	uORF	em02
FBtr0073043	FBtr0073043_116	1.33646	uORF	em02
FBtr0073063	FBtr0073063_164	0.202639	uORF	em02
FBtr0073082	FBtr0073082_104	-2.33427	uORF	em02
FBtr0073082	FBtr0073082_108	-2.00542	uORF	em02
FBtr0073082	FBtr0073082_122	-2.08358	uORF	em02
FBtr0073082	FBtr0073082_126	-1.70026	uORF	em02
FBtr0073082	FBtr0073082_129	-1.55653	uORF	em02
FBtr0073093	FBtr0073093_113	-0.937281	uORF	em02
FBtr0073095	FBtr0073095_117	-0.000551649	uORF	em02
FBtr0073108	FBtr0073108_66	2.90127	uORF	em02
FBtr0073114	FBtr0073114_162	1.11037	uORF	em02
FBtr0073118	FBtr0073118_226	0.00154945	uORF	em02
FBtr0073118	FBtr0073118_248	0.185948	uORF	em02
FBtr0073118	FBtr0073118_33	3.02576	uORF	em02
FBtr0073143	FBtr0073143_196	-0.989576	uORF	em02
FBtr0073143	FBtr0073143_60	-1.45568	uORF	em02
FBtr0073145	FBtr0073145_545	4	uORF	em02
FBtr0073148	FBtr0073148_40	0.53052	uORF	em02
FBtr0073165	FBtr0073165_752	3.36533	uORF	em02
FBtr0073165	FBtr0073165_842	4	uORF	em02
FBtr0073165	FBtr0073165_962	3.09274	uORF	em02
FBtr0073173	FBtr0073173_22	1.6954	uORF	em02
FBtr0073173	FBtr0073173_90	-0.308904	uORF	em02
FBtr0073176	FBtr0073176_112	1.59811	uORF	em02
FBtr0073185	FBtr0073185_158	-0.399094	uORF	em02
FBtr0073185	FBtr0073185_279	0.0693741	uORF	em02
FBtr0073185	FBtr0073185_399	-0.78581	uORF	em02
FBtr0073185	FBtr0073185_436	-0.878925	uORF	em02
FBtr0073187	FBtr0073187_553	-0.844508	uORF	em02
FBtr0073193	FBtr0073193_37	3.62835	uORF	em02
FBtr0073209	FBtr0073209_160	2.10528	uORF	em02
FBtr0073211	FBtr0073211_274	1.23395	uORF	em02
FBtr0073211	FBtr0073211_417	0.990285	uORF	em02
FBtr0073211	FBtr0073211_94	2.91215	uORF	em02
FBtr0073217	FBtr0073217_151	-1.61248	uORF	em02
FBtr0073217	FBtr0073217_47	2.60964	uORF	em02
FBtr0073217	FBtr0073217_54	2.68649	uORF	em02
FBtr0073217	FBtr0073217_76	-0.494594	uORF	em02
FBtr0073231	FBtr0073231_195	4	uORF	em02
FBtr0073231	FBtr0073231_67	0.507827	uORF	em02
FBtr0073242	FBtr0073242_6	0.108368	uORF	em02
FBtr0073245	FBtr0073245_203	-0.43863	uORF	em02
FBtr0073260	FBtr0073260_150	0.600863	uORF	em02
FBtr0073271	FBtr0073271_221	-0.155179	uORF	em02
FBtr0073271	FBtr0073271_443	-0.145798	uORF	em02
FBtr0073271	FBtr0073271_634	-0.532843	uORF	em02
FBtr0073271	FBtr0073271_642	3.21343	uORF	em02
FBtr0073271	FBtr0073271_675	-1.12156	uORF	em02
FBtr0073271	FBtr0073271_801	0.15729	uORF	em02
FBtr0073286	FBtr0073286_102	4	uORF	em02
FBtr0073287	FBtr0073287_47	0.387493	uORF	em02
FBtr0073287	FBtr0073287_53	0.570517	uORF	em02
FBtr0073310	FBtr0073310_147	0.617967	uORF	em02
FBtr0073310	FBtr0073310_258	-1.23565	uORF	em02
FBtr0073310	FBtr0073310_291	1.49277	uORF	em02
FBtr0073310	FBtr0073310_364	-0.132287	uORF	em02
FBtr0073310	FBtr0073310_415	0.0396804	uORF	em02
FBtr0073345	FBtr0073345_392	1.46587	uORF	em02
FBtr0073345	FBtr0073345_544	3.53527	uORF	em02
FBtr0073345	FBtr0073345_56	-0.763861	uORF	em02
FBtr0073345	FBtr0073345_637	1.95032	uORF	em02
FBtr0073345	FBtr0073345_644	3.10227	uORF	em02
FBtr0073345	FBtr0073345_800	0.0435391	uORF	em02
FBtr0073345	FBtr0073345_938	0.0435391	uORF	em02
FBtr0073345	FBtr0073345_990	0.86296	uORF	em02
FBtr0073348	FBtr0073348_71	0.370279	uORF	em02
FBtr0073380	FBtr0073380_6	4	uORF	em02
FBtr0073380	FBtr0073380_96	4	uORF	em02
FBtr0073381	FBtr0073381_160	-1.75899	uORF	em02
FBtr0073387	FBtr0073387_40	4	uORF	em02
FBtr0073409	FBtr0073409_82	-0.136078	uORF	em02
FBtr0073409	FBtr0073409_9	-0.178864	uORF	em02
FBtr0073410	FBtr0073410_144	-1.91431	uORF	em02
FBtr0073410	FBtr0073410_47	-1.20457	uORF	em02
FBtr0073422	FBtr0073422_155	4	uORF	em02
FBtr0073429	FBtr0073429_3	-1.80205	uORF	em02
FBtr0073440	FBtr0073440_31	4	uORF	em02
FBtr0073448	FBtr0073448_85	-1.12346	uORF	em02
FBtr0073451	FBtr0073451_59	2.08889	uORF	em02
FBtr0073453	FBtr0073453_224	-0.000857827	uORF	em02
FBtr0073453	FBtr0073453_651	0.388491	uORF	em02
FBtr0073453	FBtr0073453_677	-0.0157692	uORF	em02
FBtr0073454	FBtr0073454_144	-0.117018	uORF	em02
FBtr0073454	FBtr0073454_83	0.442613	uORF	em02
FBtr0073457	FBtr0073457_344	-0.414473	uORF	em02
FBtr0073457	FBtr0073457_523	0.103399	uORF	em02
FBtr0073460	FBtr0073460_45	3.52559	uORF	em02
FBtr0073475	FBtr0073475_118	-1.13419	uORF	em02
FBtr0073480	FBtr0073480_53	1.85465	uORF	em02
FBtr0073480	FBtr0073480_58	1.43763	uORF	em02
FBtr0073481	FBtr0073481_123	2.75196	uORF	em02
FBtr0073481	FBtr0073481_214	0.863916	uORF	em02
FBtr0073481	FBtr0073481_224	0.108381	uORF	em02
FBtr0073481	FBtr0073481_496	0.614696	uORF	em02
FBtr0073481	FBtr0073481_526	1.31136	uORF	em02
FBtr0073481	FBtr0073481_814	-0.158133	uORF	em02
FBtr0073481	FBtr0073481_885	3.45842	uORF	em02
FBtr0073482	FBtr0073482_37	0.926509	uORF	em02
FBtr0073499	FBtr0073499_77	-0.898839	uORF	em02
FBtr0073512	FBtr0073512_123	1.50785	uORF	em02
FBtr0073516	FBtr0073516_104	-1.45547	uORF	em02
FBtr0073521	FBtr0073521_370	0.448902	uORF	em02
FBtr0073521	FBtr0073521_624	-0.118991	uORF	em02
FBtr0073533	FBtr0073533_85	2.64524	uORF	em02
FBtr0073540	FBtr0073540_44	-0.42543	uORF	em02
FBtr0073542	FBtr0073542_111	-0.441372	uORF	em02
FBtr0073552	FBtr0073552_178	-2.60844	uORF	em02
FBtr0073552	FBtr0073552_215	-0.508321	uORF	em02
FBtr0073552	FBtr0073552_28	-2.66209	uORF	em02
FBtr0073573	FBtr0073573_122	0.935879	uORF	em02
FBtr0073573	FBtr0073573_246	1.14297	uORF	em02
FBtr0073573	FBtr0073573_312	3.01761	uORF	em02
FBtr0073573	FBtr0073573_491	3.46878	uORF	em02
FBtr0073573	FBtr0073573_80	0.914756	uORF	em02
FBtr0073573	FBtr0073573_84	-0.358844	uORF	em02
FBtr0073573	FBtr0073573_96	-0.979961	uORF	em02
FBtr0073574	FBtr0073574_230	2.26385	uORF	em02
FBtr0073574	FBtr0073574_247	2.54573	uORF	em02
FBtr0073579	FBtr0073579_107	1.15038	uORF	em02
FBtr0073579	FBtr0073579_46	1.40823	uORF	em02
FBtr0073579	FBtr0073579_57	0.420301	uORF	em02
FBtr0073579	FBtr0073579_6	4	uORF	em02
FBtr0073579	FBtr0073579_81	-1.0032	uORF	em02
FBtr0073579	FBtr0073579_92	1.38053	uORF	em02
FBtr0073580	FBtr0073580_286	-1.39902	uORF	em02
FBtr0073580	FBtr0073580_292	-1.39902	uORF	em02
FBtr0073580	FBtr0073580_373	-2.39902	uORF	em02
FBtr0073580	FBtr0073580_395	-1.81406	uORF	em02
FBtr0073600	FBtr0073600_120	3.76841	uORF	em02
FBtr0073600	FBtr0073600_38	3.24112	uORF	em02
FBtr0073602	FBtr0073602_15	2.50774	uORF	em02
FBtr0073607	FBtr0073607_223	-1.25574	uORF	em02
FBtr0073620	FBtr0073620_11	-0.814095	uORF	em02
FBtr0073620	FBtr0073620_281	-0.778794	uORF	em02
FBtr0073620	FBtr0073620_331	-0.892787	uORF	em02
FBtr0073641	FBtr0073641_290	1.35827	uORF	em02
FBtr0073641	FBtr0073641_84	2.67057	uORF	em02
FBtr0073652	FBtr0073652_273	0.437415	uORF	em02
FBtr0073657	FBtr0073657_11	0.812357	uORF	em02
FBtr0073657	FBtr0073657_2	-0.399084	uORF	em02
FBtr0073658	FBtr0073658_2	-0.223524	uORF	em02
FBtr0073658	FBtr0073658_27	4	uORF	em02
FBtr0073660	FBtr0073660_218	-2.3663	uORF	em02
FBtr0073660	FBtr0073660_225	-2.51183	uORF	em02
FBtr0073660	FBtr0073660_72	-0.735658	uORF	em02
FBtr0073669	FBtr0073669_103	1.63331	uORF	em02
FBtr0073669	FBtr0073669_223	-0.49239	uORF	em02
FBtr0073669	FBtr0073669_244	-0.488374	uORF	em02
FBtr0073669	FBtr0073669_26	0.557422	uORF	em02
FBtr0073678	FBtr0073678_828	-0.591777	uORF	em02
FBtr0073683	FBtr0073683_157	-0.125427	uORF	em02
FBtr0073691	FBtr0073691_27	4	uORF	em02
FBtr0073692	FBtr0073692_123	0.623263	uORF	em02
FBtr0073694	FBtr0073694_172	4	uORF	em02
FBtr0073695	FBtr0073695_139	-0.439713	uORF	em02
FBtr0073695	FBtr0073695_160	0.0414759	uORF	em02
FBtr0073695	FBtr0073695_98	4	uORF	em02
FBtr0073704	FBtr0073704_100	-0.229186	uORF	em02
FBtr0073704	FBtr0073704_241	-3.9527	uORF	em02
FBtr0073704	FBtr0073704_8	0.337895	uORF	em02
FBtr0073705	FBtr0073705_30	-0.00530581	uORF	em02
FBtr0073712	FBtr0073712_149	4	uORF	em02
FBtr0073712	FBtr0073712_657	4	uORF	em02
FBtr0073720	FBtr0073720_183	1.44682	uORF	em02
FBtr0073724	FBtr0073724_174	-0.67212	uORF	em02
FBtr0073730	FBtr0073730_22	1.88793	uORF	em02
FBtr0073747	FBtr0073747_168	3.31054	uORF	em02
FBtr0073747	FBtr0073747_258	4	uORF	em02
FBtr0073747	FBtr0073747_290	2.41396	uORF	em02
FBtr0073747	FBtr0073747_303	1.78021	uORF	em02
FBtr0073747	FBtr0073747_414	0.798897	uORF	em02
FBtr0073754	FBtr0073754_73	0.465936	uORF	em02
FBtr0073755	FBtr0073755_248	4	uORF	em02
FBtr0073756	FBtr0073756_126	0.795014	uORF	em02
FBtr0073756	FBtr0073756_148	-0.721015	uORF	em02
FBtr0073756	FBtr0073756_172	0.656393	uORF	em02
FBtr0073756	FBtr0073756_93	1.08336	uORF	em02
FBtr0073757	FBtr0073757_120	0.696821	uORF	em02
FBtr0073757	FBtr0073757_47	1.0963	uORF	em02
FBtr0073776	FBtr0073776_273	-0.250234	uORF	em02
FBtr0073776	FBtr0073776_343	-0.956151	uORF	em02
FBtr0073779	FBtr0073779_30	-1.24711	uORF	em02
FBtr0073779	FBtr0073779_81	0.240832	uORF	em02
FBtr0073805	FBtr0073805_202	-2.9861	uORF	em02
FBtr0073834	FBtr0073834_50	1.43097	uORF	em02
FBtr0073834	FBtr0073834_69	2.71809	uORF	em02
FBtr0073840	FBtr0073840_216	-0.944524	uORF	em02
FBtr0073841	FBtr0073841_264	-2.66211	uORF	em02
FBtr0073841	FBtr0073841_65	-0.0982851	uORF	em02
FBtr0073841	FBtr0073841_85	-0.806479	uORF	em02
FBtr0073842	FBtr0073842_120	-0.470248	uORF	em02
FBtr0073843	FBtr0073843_167	-2.00527	uORF	em02
FBtr0073843	FBtr0073843_175	-2.07307	uORF	em02
FBtr0073843	FBtr0073843_185	-1.92105	uORF	em02
FBtr0073844	FBtr0073844_288	-1.12712	uORF	em02
FBtr0073844	FBtr0073844_297	-1.18497	uORF	em02
FBtr0073846	FBtr0073846_173	-0.248035	uORF	em02
FBtr0073846	FBtr0073846_184	-0.399103	uORF	em02
FBtr0073846	FBtr0073846_197	0.0629989	uORF	em02
FBtr0073846	FBtr0073846_41	0.159979	uORF	em02
FBtr0073846	FBtr0073846_56	-0.476263	uORF	em02
FBtr0073846	FBtr0073846_76	-0.229179	uORF	em02
FBtr0073846	FBtr0073846_88	-0.229179	uORF	em02
FBtr0073847	FBtr0073847_19	2.9503	uORF	em02
FBtr0073847	FBtr0073847_31	2.9503	uORF	em02
FBtr0073849	FBtr0073849_12	-0.175438	uORF	em02
FBtr0073849	FBtr0073849_213	0.974004	uORF	em02
FBtr0073849	FBtr0073849_360	1.01593	uORF	em02
FBtr0073900	FBtr0073900_29	-2.80734	uORF	em02
FBtr0073923	FBtr0073923_482	-0.199793	uORF	em02
FBtr0073946	FBtr0073946_134	1.52607	uORF	em02
FBtr0073946	FBtr0073946_147	-0.42748	uORF	em02
FBtr0073946	FBtr0073946_19	-0.10163	uORF	em02
FBtr0073946	FBtr0073946_50	-0.524638	uORF	em02
FBtr0073946	FBtr0073946_9	-0.267866	uORF	em02
FBtr0073946	FBtr0073946_94	0.0874928	uORF	em02
FBtr0073958	FBtr0073958_128	0.308718	uORF	em02
FBtr0073958	FBtr0073958_279	-0.590928	uORF	em02
FBtr0073958	FBtr0073958_349	-1.06955	uORF	em02
FBtr0073961	FBtr0073961_125	4	uORF	em02
FBtr0073964	FBtr0073964_28	2.78144	uORF	em02
FBtr0073974	FBtr0073974_97	0.97018	uORF	em02
FBtr0073988	FBtr0073988_22	2.18959	uORF	em02
FBtr0073992	FBtr0073992_119	0.394444	uORF	em02
FBtr0074011	FBtr0074011_72	1.66174	uORF	em02
FBtr0074011	FBtr0074011_81	1.61975	uORF	em02
FBtr0074020	FBtr0074020_27	0.60085	uORF	em02
FBtr0074053	FBtr0074053_172	0.700428	uORF	em02
FBtr0074053	FBtr0074053_71	-1.4022	uORF	em02
FBtr0074053	FBtr0074053_83	-1.39082	uORF	em02
FBtr0074054	FBtr0074054_50	0.244756	uORF	em02
FBtr0074054	FBtr0074054_94	0.448915	uORF	em02
FBtr0074060	FBtr0074060_123	-1.75769	uORF	em02
FBtr0074060	FBtr0074060_142	-1.98404	uORF	em02
FBtr0074063	FBtr0074063_399	2.59521	uORF	em02
FBtr0074063	FBtr0074063_502	4	uORF	em02
FBtr0074064	FBtr0074064_347	4	uORF	em02
FBtr0074064	FBtr0074064_433	0.770774	uORF	em02
FBtr0074064	FBtr0074064_439	0.770774	uORF	em02
FBtr0074064	FBtr0074064_476	2.47528	uORF	em02
FBtr0074072	FBtr0074072_166	1.57711	uORF	em02
FBtr0074072	FBtr0074072_315	0.996202	uORF	em02
FBtr0074072	FBtr0074072_370	4	uORF	em02
FBtr0074072	FBtr0074072_420	-0.668686	uORF	em02
FBtr0074072	FBtr0074072_461	0.301351	uORF	em02
FBtr0074077	FBtr0074077_87	-0.572536	uORF	em02
FBtr0074085	FBtr0074085_144	0.282724	uORF	em02
FBtr0074090	FBtr0074090_59	4	uORF	em02
FBtr0074097	FBtr0074097_53	4	uORF	em02
FBtr0074104	FBtr0074104_53	1.0445	uORF	em02
FBtr0074106	FBtr0074106_147	-0.504143	uORF	em02
FBtr0074106	FBtr0074106_187	-0.712537	uORF	em02
FBtr0074106	FBtr0074106_37	1.48901	uORF	em02
FBtr0074114	FBtr0074114_152	3.6131	uORF	em02
FBtr0074114	FBtr0074114_158	1.68105	uORF	em02
FBtr0074114	FBtr0074114_275	1.01409	uORF	em02
FBtr0074114	FBtr0074114_34	3.04343	uORF	em02
FBtr0074114	FBtr0074114_366	-1.47064	uORF	em02
FBtr0074114	FBtr0074114_401	0.773016	uORF	em02
FBtr0074114	FBtr0074114_464	-0.729247	uORF	em02
FBtr0074114	FBtr0074114_545	-1.07491	uORF	em02
FBtr0074114	FBtr0074114_56	1.11183	uORF	em02
FBtr0074114	FBtr0074114_74	0.185848	uORF	em02
FBtr0074114	FBtr0074114_90	-0.56286	uORF	em02
FBtr0074117	FBtr0074117_7	-0.0205896	uORF	em02
FBtr0074130	FBtr0074130_218	2.55084	uORF	em02
FBtr0074130	FBtr0074130_265	-0.219854	uORF	em02
FBtr0074130	FBtr0074130_284	-0.277377	uORF	em02
FBtr0074130	FBtr0074130_314	1.11386	uORF	em02
FBtr0074130	FBtr0074130_356	1.77181	uORF	em02
FBtr0074130	FBtr0074130_576	0.168085	uORF	em02
FBtr0074134	FBtr0074134_71	0.13582	uORF	em02
FBtr0074135	FBtr0074135_107	1.87035	uORF	em02
FBtr0074140	FBtr0074140_109	-0.254832	uORF	em02
FBtr0074140	FBtr0074140_267	-0.483817	uORF	em02
FBtr0074140	FBtr0074140_98	-0.0605763	uORF	em02
FBtr0074144	FBtr0074144_15	1.57398	uORF	em02
FBtr0074144	FBtr0074144_361	0.692344	uORF	em02
FBtr0074144	FBtr0074144_448	0.349595	uORF	em02
FBtr0074144	FBtr0074144_46	1.46654	uORF	em02
FBtr0074144	FBtr0074144_525	-0.213808	uORF	em02
FBtr0074144	FBtr0074144_829	-0.638226	uORF	em02
FBtr0074159	FBtr0074159_149	-0.772405	uORF	em02
FBtr0074159	FBtr0074159_73	1.48866	uORF	em02
FBtr0074166	FBtr0074166_126	1.2664	uORF	em02
FBtr0074166	FBtr0074166_166	0.580407	uORF	em02
FBtr0074166	FBtr0074166_206	-0.386999	uORF	em02
FBtr0074166	FBtr0074166_9	2.09834	uORF	em02
FBtr0074167	FBtr0074167_116	-0.163472	uORF	em02
FBtr0074167	FBtr0074167_133	-0.871375	uORF	em02
FBtr0074167	FBtr0074167_185	-2.36778	uORF	em02
FBtr0074167	FBtr0074167_19	1.79728	uORF	em02
FBtr0074167	FBtr0074167_193	-0.5026	uORF	em02
FBtr0074167	FBtr0074167_273	3.62837	uORF	em02
FBtr0074167	FBtr0074167_281	0.301321	uORF	em02
FBtr0074167	FBtr0074167_70	1.01589	uORF	em02
FBtr0074167	FBtr0074167_95	-0.273569	uORF	em02
FBtr0074168	FBtr0074168_64	1.18577	uORF	em02
FBtr0074169	FBtr0074169_173	4	uORF	em02
FBtr0074169	FBtr0074169_202	-0.422907	uORF	em02
FBtr0074169	FBtr0074169_311	-0.0811119	uORF	em02
FBtr0074169	FBtr0074169_50	0.581445	uORF	em02
FBtr0074169	FBtr0074169_85	2.95403	uORF	em02
FBtr0074174	FBtr0074174_104	2.89708	uORF	em02
FBtr0074174	FBtr0074174_123	-0.814162	uORF	em02
FBtr0074174	FBtr0074174_21	1.18586	uORF	em02
FBtr0074174	FBtr0074174_212	1.49922	uORF	em02
FBtr0074174	FBtr0074174_314	1.07382	uORF	em02
FBtr0074174	FBtr0074174_332	-0.118993	uORF	em02
FBtr0074174	FBtr0074174_36	1.17165	uORF	em02
FBtr0074174	FBtr0074174_407	-0.187595	uORF	em02
FBtr0074174	FBtr0074174_414	0.373452	uORF	em02
FBtr0074174	FBtr0074174_421	0.269592	uORF	em02
FBtr0074174	FBtr0074174_435	0.591339	uORF	em02
FBtr0074174	FBtr0074174_499	0.457535	uORF	em02
FBtr0074178	FBtr0074178_3	-0.814172	uORF	em02
FBtr0074179	FBtr0074179_179	0.836946	uORF	em02
FBtr0074183	FBtr0074183_14	-0.42114	uORF	em02
FBtr0074183	FBtr0074183_24	2.67283	uORF	em02
FBtr0074183	FBtr0074183_54	-2.22659	uORF	em02
FBtr0074183	FBtr0074183_92	1.09342	uORF	em02
FBtr0074184	FBtr0074184_149	4	uORF	em02
FBtr0074185	FBtr0074185_137	-1.39902	uORF	em02
FBtr0074190	FBtr0074190_205	0.391535	uORF	em02
FBtr0074190	FBtr0074190_302	-0.864194	uORF	em02
FBtr0074190	FBtr0074190_403	-0.208977	uORF	em02
FBtr0074190	FBtr0074190_420	0.159733	uORF	em02
FBtr0074201	FBtr0074201_11	0.00978093	uORF	em02
FBtr0074201	FBtr0074201_6	0.0159361	uORF	em02
FBtr0074202	FBtr0074202_90	1.97009	uORF	em02
FBtr0074203	FBtr0074203_57	-0.718429	uORF	em02
FBtr0074209	FBtr0074209_65	0.705581	uORF	em02
FBtr0074226	FBtr0074226_146	-1.15392	uORF	em02
FBtr0074226	FBtr0074226_39	-1.96445	uORF	em02
FBtr0074230	FBtr0074230_163	-1.82609	uORF	em02
FBtr0074230	FBtr0074230_226	-0.5222	uORF	em02
FBtr0074237	FBtr0074237_146	-0.596328	uORF	em02
FBtr0074240	FBtr0074240_17	-0.562617	uORF	em02
FBtr0074241	FBtr0074241_81	2.33798	uORF	em02
FBtr0074255	FBtr0074255_400	1.82967	uORF	em02
FBtr0074255	FBtr0074255_406	2.99458	uORF	em02
FBtr0074255	FBtr0074255_459	-2.27624	uORF	em02
FBtr0074255	FBtr0074255_545	-1.49222	uORF	em02
FBtr0074255	FBtr0074255_569	-0.393553	uORF	em02
FBtr0074255	FBtr0074255_807	-0.951642	uORF	em02
FBtr0074255	FBtr0074255_944	4	uORF	em02
FBtr0074255	FBtr0074255_952	-3.12155	uORF	em02
FBtr0074261	FBtr0074261_100	0.670925	uORF	em02
FBtr0074261	FBtr0074261_142	0.665361	uORF	em02
FBtr0074261	FBtr0074261_92	0.359138	uORF	em02
FBtr0074268	FBtr0074268_146	-1.39902	uORF	em02
FBtr0074268	FBtr0074268_235	-0.98401	uORF	em02
FBtr0074268	FBtr0074268_243	-1.39902	uORF	em02
FBtr0074268	FBtr0074268_60	0.600879	uORF	em02
FBtr0074271	FBtr0074271_6	4	uORF	em02
FBtr0074285	FBtr0074285_114	-0.704974	uORF	em02
FBtr0074285	FBtr0074285_123	-1.14713	uORF	em02
FBtr0074285	FBtr0074285_231	-0.332065	uORF	em02
FBtr0074285	FBtr0074285_267	-0.0231143	uORF	em02
FBtr0074286	FBtr0074286_533	-1.09987	uORF	em02
FBtr0074286	FBtr0074286_736	-2.65108	uORF	em02
FBtr0074290	FBtr0074290_15	4	uORF	em02
FBtr0074294	FBtr0074294_116	-0.682812	uORF	em02
FBtr0074296	FBtr0074296_68	2.62848	uORF	em02
FBtr0074305	FBtr0074305_55	2.07542	uORF	em02
FBtr0074307	FBtr0074307_202	-0.276244	uORF	em02
FBtr0074307	FBtr0074307_71	2.13431	uORF	em02
FBtr0074314	FBtr0074314_149	0.290374	uORF	em02
FBtr0074314	FBtr0074314_169	-0.485272	uORF	em02
FBtr0074314	FBtr0074314_190	0.0416733	uORF	em02
FBtr0074314	FBtr0074314_222	-0.606939	uORF	em02
FBtr0074314	FBtr0074314_35	0.78532	uORF	em02
FBtr0074314	FBtr0074314_420	0.878877	uORF	em02
FBtr0074334	FBtr0074334_77	3.40825	uORF	em02
FBtr0074342	FBtr0074342_3	-2.03616	uORF	em02
FBtr0074342	FBtr0074342_44	0.219413	uORF	em02
FBtr0074348	FBtr0074348_90	1.96346	uORF	em02
FBtr0074348	FBtr0074348_96	-0.197446	uORF	em02
FBtr0074352	FBtr0074352_1	2.78039	uORF	em02
FBtr0074355	FBtr0074355_25	2.62318	uORF	em02
FBtr0074359	FBtr0074359_363	-1.80044	uORF	em02
FBtr0074359	FBtr0074359_379	-2.86612	uORF	em02
FBtr0074359	FBtr0074359_385	0.571147	uORF	em02
FBtr0074359	FBtr0074359_427	0.692778	uORF	em02
FBtr0074359	FBtr0074359_61	2.00081	uORF	em02
FBtr0074365	FBtr0074365_206	4	uORF	em02
FBtr0074365	FBtr0074365_67	-2.98406	uORF	em02
FBtr0074372	FBtr0074372_122	-0.269819	uORF	em02
FBtr0074372	FBtr0074372_131	-0.240673	uORF	em02
FBtr0074372	FBtr0074372_322	-0.412903	uORF	em02
FBtr0074372	FBtr0074372_391	-2.49858	uORF	em02
FBtr0074372	FBtr0074372_397	-3.30591	uORF	em02
FBtr0074372	FBtr0074372_62	-0.148804	uORF	em02
FBtr0074386	FBtr0074386_188	0.26381	uORF	em02
FBtr0074386	FBtr0074386_391	-1.50867	uORF	em02
FBtr0074386	FBtr0074386_45	1.55989	uORF	em02
FBtr0074417	FBtr0074417_133	0.874324	uORF	em02
FBtr0074417	FBtr0074417_27	0.732134	uORF	em02
FBtr0074464	FBtr0074464_133	2.15341	uORF	em02
FBtr0074464	FBtr0074464_316	-2.84174	uORF	em02
FBtr0074464	FBtr0074464_322	-1.2788	uORF	em02
FBtr0074465	FBtr0074465_50	1.34291	uORF	em02
FBtr0074476	FBtr0074476_219	-1.67175	uORF	em02
FBtr0074476	FBtr0074476_264	0.995169	uORF	em02
FBtr0074476	FBtr0074476_330	2.21153	uORF	em02
FBtr0074480	FBtr0074480_24	-1.85984	uORF	em02
FBtr0074486	FBtr0074486_15	1.85583	uORF	em02
FBtr0074487	FBtr0074487_355	-0.136049	uORF	em02
FBtr0074492	FBtr0074492_23	-1.39902	uORF	em02
FBtr0074492	FBtr0074492_29	-1.39902	uORF	em02
FBtr0074492	FBtr0074492_92	3.34034	uORF	em02
FBtr0074527	FBtr0074527_103	0.235904	uORF	em02
FBtr0074530	FBtr0074530_93	-0.399084	uORF	em02
FBtr0074540	FBtr0074540_52	-0.369335	uORF	em02
FBtr0074555	FBtr0074555_104	-0.407703	uORF	em02
FBtr0074555	FBtr0074555_334	-1.66078	uORF	em02
FBtr0074581	FBtr0074581_113	0.185839	uORF	em02
FBtr0074581	FBtr0074581_653	0.408216	uORF	em02
FBtr0074612	FBtr0074612_87	-1.52336	uORF	em02
FBtr0074617	FBtr0074617_143	3.50775	uORF	em02
FBtr0074617	FBtr0074617_159	0.600953	uORF	em02
FBtr0074617	FBtr0074617_363	4	uORF	em02
FBtr0074622	FBtr0074622_160	-0.45741	uORF	em02
FBtr0074623	FBtr0074623_147	1.09789	uORF	em02
FBtr0074623	FBtr0074623_308	0.972665	uORF	em02
FBtr0074623	FBtr0074623_425	2.65525	uORF	em02
FBtr0074623	FBtr0074623_60	1.04288	uORF	em02
FBtr0074623	FBtr0074623_63	1.10283	uORF	em02
FBtr0074623	FBtr0074623_96	0.560251	uORF	em02
FBtr0074635	FBtr0074635_11	-1.41116	uORF	em02
FBtr0074635	FBtr0074635_22	1.45331	uORF	em02
FBtr0074643	FBtr0074643_64	1.13879	uORF	em02
FBtr0074647	FBtr0074647_140	0.480192	uORF	em02
FBtr0074655	FBtr0074655_113	2.76235	uORF	em02
FBtr0074666	FBtr0074666_52	1.97012	uORF	em02
FBtr0074671	FBtr0074671_261	-0.399105	uORF	em02
FBtr0074684	FBtr0074684_456	-0.511548	uORF	em02
FBtr0074684	FBtr0074684_600	-0.879667	uORF	em02
FBtr0074684	FBtr0074684_623	-0.96715	uORF	em02
FBtr0074684	FBtr0074684_728	1.21559	uORF	em02
FBtr0074684	FBtr0074684_844	1.01591	uORF	em02
FBtr0074687	FBtr0074687_180	1.60079	uORF	em02
FBtr0074687	FBtr0074687_193	1.18577	uORF	em02
FBtr0074687	FBtr0074687_826	2.00588	uORF	em02
FBtr0074687	FBtr0074687_83	-0.472379	uORF	em02
FBtr0074687	FBtr0074687_958	0.0483625	uORF	em02
FBtr0074689	FBtr0074689_20	4	uORF	em02
FBtr0074707	FBtr0074707_132	-0.0361021	uORF	em02
FBtr0074707	FBtr0074707_503	2.31897	uORF	em02
FBtr0074707	FBtr0074707_555	-3.27865	uORF	em02
FBtr0074707	FBtr0074707_677	0.224482	uORF	em02
FBtr0074707	FBtr0074707_84	-1.53088	uORF	em02
FBtr0074711	FBtr0074711_28	0.575817	uORF	em02
FBtr0074721	FBtr0074721_272	-0.309347	uORF	em02
FBtr0074721	FBtr0074721_320	-1.67472	uORF	em02
FBtr0074721	FBtr0074721_361	-3.46944	uORF	em02
FBtr0074721	FBtr0074721_414	3.34905	uORF	em02
FBtr0074721	FBtr0074721_650	-0.200803	uORF	em02
FBtr0074746	FBtr0074746_141	-1.52471	uORF	em02
FBtr0074750	FBtr0074750_59	-1.36191	uORF	em02
FBtr0074753	FBtr0074753_23	2.35576	uORF	em02
FBtr0074754	FBtr0074754_119	-1.06313	uORF	em02
FBtr0074754	FBtr0074754_9	1.06033	uORF	em02
FBtr0074758	FBtr0074758_220	0.448897	uORF	em02
FBtr0074758	FBtr0074758_407	1.99326	uORF	em02
FBtr0074759	FBtr0074759_101	-0.270012	uORF	em02
FBtr0074759	FBtr0074759_112	0.769482	uORF	em02
FBtr0074760	FBtr0074760_43	-1.22918	uORF	em02
FBtr0074768	FBtr0074768_41	0.308114	uORF	em02
FBtr0074771	FBtr0074771_104	-0.877013	uORF	em02
FBtr0074771	FBtr0074771_157	-0.627023	uORF	em02
FBtr0074771	FBtr0074771_321	0.161817	uORF	em02
FBtr0074771	FBtr0074771_334	0.171792	uORF	em02
FBtr0074771	FBtr0074771_344	-2.36305	uORF	em02
FBtr0074771	FBtr0074771_491	-0.738947	uORF	em02
FBtr0074771	FBtr0074771_95	-0.04746	uORF	em02
FBtr0074775	FBtr0074775_149	2.52366	uORF	em02
FBtr0074795	FBtr0074795_141	1.30316	uORF	em02
FBtr0074800	FBtr0074800_103	-1.92454	uORF	em02
FBtr0074800	FBtr0074800_114	-1.72103	uORF	em02
FBtr0074800	FBtr0074800_296	-0.936525	uORF	em02
FBtr0074800	FBtr0074800_43	-1.26534	uORF	em02
FBtr0074804	FBtr0074804_223	-0.350804	uORF	em02
FBtr0074804	FBtr0074804_258	-0.176708	uORF	em02
FBtr0074804	FBtr0074804_277	-0.20199	uORF	em02
FBtr0074804	FBtr0074804_287	-0.662134	uORF	em02
FBtr0074804	FBtr0074804_299	-0.195234	uORF	em02
FBtr0074804	FBtr0074804_313	1.45332	uORF	em02
FBtr0074804	FBtr0074804_319	1.24133	uORF	em02
FBtr0074804	FBtr0074804_348	0.409369	uORF	em02
FBtr0074804	FBtr0074804_725	0.661884	uORF	em02
FBtr0074804	FBtr0074804_877	0.263026	uORF	em02
FBtr0074807	FBtr0074807_223	0.983189	uORF	em02
FBtr0074807	FBtr0074807_836	-0.122242	uORF	em02
FBtr0074807	FBtr0074807_866	-0.713361	uORF	em02
FBtr0074807	FBtr0074807_906	-1.86726	uORF	em02
FBtr0074810	FBtr0074810_258	-1.13815	uORF	em02
FBtr0074812	FBtr0074812_165	1.75284	uORF	em02
FBtr0074825	FBtr0074825_110	-0.35019	uORF	em02
FBtr0074825	FBtr0074825_124	0.300231	uORF	em02
FBtr0074825	FBtr0074825_277	1.8494	uORF	em02
FBtr0074825	FBtr0074825_353	2.54918	uORF	em02
FBtr0074825	FBtr0074825_77	0.125395	uORF	em02
FBtr0074837	FBtr0074837_70	1.18135	uORF	em02
FBtr0074839	FBtr0074839_470	0.864433	uORF	em02
FBtr0074840	FBtr0074840_126	0.316555	uORF	em02
FBtr0074846	FBtr0074846_74	0.073386	uORF	em02
FBtr0074847	FBtr0074847_1	1.77081	uORF	em02
FBtr0074847	FBtr0074847_13	1.70369	uORF	em02
FBtr0074848	FBtr0074848_206	4	uORF	em02
FBtr0074850	FBtr0074850_142	-0.229173	uORF	em02
FBtr0074850	FBtr0074850_153	-0.700754	uORF	em02
FBtr0074850	FBtr0074850_229	-1.72105	uORF	em02
FBtr0074850	FBtr0074850_51	-1.18635	uORF	em02
FBtr0074864	FBtr0074864_159	-2.09949	uORF	em02
FBtr0074864	FBtr0074864_195	3.04343	uORF	em02
FBtr0074864	FBtr0074864_277	-0.206437	uORF	em02
FBtr0074873	FBtr0074873_100	-0.219776	uORF	em02
FBtr0074873	FBtr0074873_173	-1.11458	uORF	em02
FBtr0074881	FBtr0074881_55	0.100799	uORF	em02
FBtr0074882	FBtr0074882_119	0.405173	uORF	em02
FBtr0074882	FBtr0074882_20	0.510736	uORF	em02
FBtr0074882	FBtr0074882_292	-0.799029	uORF	em02
FBtr0074882	FBtr0074882_81	0.71052	uORF	em02
FBtr0074882	FBtr0074882_93	-0.159579	uORF	em02
FBtr0074891	FBtr0074891_115	-0.53157	uORF	em02
FBtr0074891	FBtr0074891_6	-0.644232	uORF	em02
FBtr0074894	FBtr0074894_51	1.88075	uORF	em02
FBtr0074900	FBtr0074900_153	-1.29954	uORF	em02
FBtr0074900	FBtr0074900_216	-1.13604	uORF	em02
FBtr0074900	FBtr0074900_87	0.638354	uORF	em02
FBtr0074902	FBtr0074902_123	-0.69368	uORF	em02
FBtr0074902	FBtr0074902_138	-0.652533	uORF	em02
FBtr0074902	FBtr0074902_181	0.371267	uORF	em02
FBtr0074902	FBtr0074902_226	1.62326	uORF	em02
FBtr0074903	FBtr0074903_12	-2.41852	uORF	em02
FBtr0074903	FBtr0074903_22	0.860485	uORF	em02
FBtr0074903	FBtr0074903_29	0.817743	uORF	em02
FBtr0074903	FBtr0074903_36	0.727221	uORF	em02
FBtr0074908	FBtr0074908_77	-1.67175	uORF	em02
FBtr0074917	FBtr0074917_136	-0.0612296	uORF	em02
FBtr0074917	FBtr0074917_144	-0.662157	uORF	em02
FBtr0074917	FBtr0074917_202	-0.798193	uORF	em02
FBtr0074917	FBtr0074917_22	2.26583	uORF	em02
FBtr0074917	FBtr0074917_329	1.18285	uORF	em02
FBtr0074917	FBtr0074917_339	1.11969	uORF	em02
FBtr0074917	FBtr0074917_350	1.14863	uORF	em02
FBtr0074917	FBtr0074917_45	1.82967	uORF	em02
FBtr0074917	FBtr0074917_54	1.87031	uORF	em02
FBtr0074917	FBtr0074917_71	1.2238	uORF	em02
FBtr0074917	FBtr0074917_86	1.18583	uORF	em02
FBtr0074918	FBtr0074918_34	-0.0365347	uORF	em02
FBtr0074920	FBtr0074920_164	-1.01263	uORF	em02
FBtr0074920	FBtr0074920_185	-1.96555	uORF	em02
FBtr0074921	FBtr0074921_373	-0.378368	uORF	em02
FBtr0074921	FBtr0074921_401	-0.619559	uORF	em02
FBtr0074924	FBtr0074924_58	1.19275	uORF	em02
FBtr0074924	FBtr0074924_78	1.49781	uORF	em02
FBtr0074938	FBtr0074938_12	-0.662097	uORF	em02
FBtr0074947	FBtr0074947_102	-0.846663	uORF	em02
FBtr0074953	FBtr0074953_380	2.23313	uORF	em02
FBtr0074963	FBtr0074963_154	-0.662176	uORF	em02
FBtr0074963	FBtr0074963_246	0.463377	uORF	em02
FBtr0074989	FBtr0074989_151	1.4802	uORF	em02
FBtr0074989	FBtr0074989_223	2.60022	uORF	em02
FBtr0074989	FBtr0074989_69	4	uORF	em02
FBtr0074991	FBtr0074991_19	2.79882	uORF	em02
FBtr0075018	FBtr0075018_50	0.878203	uORF	em02
FBtr0075019	FBtr0075019_57	-1.02314	uORF	em02
FBtr0075022	FBtr0075022_51	4	uORF	em02
FBtr0075025	FBtr0075025_169	-3.06408	uORF	em02
FBtr0075033	FBtr0075033_5	-1.13604	uORF	em02
FBtr0075037	FBtr0075037_1	0.814578	uORF	em02
FBtr0075037	FBtr0075037_147	1.02457	uORF	em02
FBtr0075037	FBtr0075037_150	1.5375	uORF	em02
FBtr0075037	FBtr0075037_232	-0.740465	uORF	em02
FBtr0075037	FBtr0075037_307	-0.897756	uORF	em02
FBtr0075037	FBtr0075037_313	0.125056	uORF	em02
FBtr0075037	FBtr0075037_319	-0.336813	uORF	em02
FBtr0075037	FBtr0075037_331	-1.97836	uORF	em02
FBtr0075039	FBtr0075039_168	4	uORF	em02
FBtr0075039	FBtr0075039_176	4	uORF	em02
FBtr0075039	FBtr0075039_492	2.88638	uORF	em02
FBtr0075039	FBtr0075039_611	4	uORF	em02
FBtr0075039	FBtr0075039_630	4	uORF	em02
FBtr0075049	FBtr0075049_248	0.668117	uORF	em02
FBtr0075049	FBtr0075049_32	-0.860014	uORF	em02
FBtr0075049	FBtr0075049_417	-0.178438	uORF	em02
FBtr0075049	FBtr0075049_638	-0.601755	uORF	em02
FBtr0075049	FBtr0075049_662	-0.51288	uORF	em02
FBtr0075049	FBtr0075049_666	-0.525618	uORF	em02
FBtr0075049	FBtr0075049_737	1.14872	uORF	em02
FBtr0075051	FBtr0075051_39	2.23441	uORF	em02
FBtr0075054	FBtr0075054_29	0.252955	uORF	em02
FBtr0075056	FBtr0075056_39	0.549641	uORF	em02
FBtr0075056	FBtr0075056_70	0.826621	uORF	em02
FBtr0075056	FBtr0075056_8	0.434422	uORF	em02
FBtr0075062	FBtr0075062_41	-3.61402	uORF	em02
FBtr0075064	FBtr0075064_165	-1.24223	uORF	em02
FBtr0075075	FBtr0075075_56	-0.41642	uORF	em02
FBtr0075075	FBtr0075075_59	-0.256065	uORF	em02
FBtr0075084	FBtr0075084_429	1.12915	uORF	em02
FBtr0075084	FBtr0075084_707	3.32891	uORF	em02
FBtr0075084	FBtr0075084_72	4	uORF	em02
FBtr0075086	FBtr0075086_1134	-1.88604	uORF	em02
FBtr0075086	FBtr0075086_1148	-1.96717	uORF	em02
FBtr0075086	FBtr0075086_1196	-1.01965	uORF	em02
FBtr0075086	FBtr0075086_733	-1.10018	uORF	em02
FBtr0075086	FBtr0075086_786	-2.41	uORF	em02
FBtr0075088	FBtr0075088_16	2.12451	uORF	em02
FBtr0075122	FBtr0075122_60	0.645855	uORF	em02
FBtr0075123	FBtr0075123_152	2.00142	uORF	em02
FBtr0075123	FBtr0075123_181	0.6288	uORF	em02
FBtr0075123	FBtr0075123_187	0.716372	uORF	em02
FBtr0075125	FBtr0075125_152	1.97939	uORF	em02
FBtr0075125	FBtr0075125_181	1.56024	uORF	em02
FBtr0075125	FBtr0075125_187	1.92281	uORF	em02
FBtr0075126	FBtr0075126_127	0.600859	uORF	em02
FBtr0075126	FBtr0075126_139	2.24086	uORF	em02
FBtr0075126	FBtr0075126_166	1.18582	uORF	em02
FBtr0075133	FBtr0075133_199	3.63869	uORF	em02
FBtr0075133	FBtr0075133_315	1.85569	uORF	em02
FBtr0075136	FBtr0075136_173	0.266038	uORF	em02
FBtr0075136	FBtr0075136_28	1.02123	uORF	em02
FBtr0075140	FBtr0075140_139	0.110056	uORF	em02
FBtr0075140	FBtr0075140_153	0.0582459	uORF	em02
FBtr0075142	FBtr0075142_158	-0.399084	uORF	em02
FBtr0075144	FBtr0075144_13	4	uORF	em02
FBtr0075152	FBtr0075152_72	4	uORF	em02
FBtr0075153	FBtr0075153_383	-1.16898	uORF	em02
FBtr0075153	FBtr0075153_387	-0.258791	uORF	em02
FBtr0075153	FBtr0075153_566	0.378527	uORF	em02
FBtr0075153	FBtr0075153_889	-2.01576	uORF	em02
FBtr0075160	FBtr0075160_37	3.96873	uORF	em02
FBtr0075161	FBtr0075161_94	0.258577	uORF	em02
FBtr0075173	FBtr0075173_481	2.8936	uORF	em02
FBtr0075187	FBtr0075187_179	0.43094	uORF	em02
FBtr0075197	FBtr0075197_368	-0.299581	uORF	em02
FBtr0075208	FBtr0075208_44	-0.533907	uORF	em02
FBtr0075215	FBtr0075215_98	0.763162	uORF	em02
FBtr0075220	FBtr0075220_56	1.63809	uORF	em02
FBtr0075222	FBtr0075222_238	-0.904811	uORF	em02
FBtr0075228	FBtr0075228_130	1.86846	uORF	em02
FBtr0075228	FBtr0075228_15	2.78599	uORF	em02
FBtr0075228	FBtr0075228_29	3.05783	uORF	em02
FBtr0075228	FBtr0075228_72	1.59579	uORF	em02
FBtr0075229	FBtr0075229_29	3.40823	uORF	em02
FBtr0075229	FBtr0075229_64	4	uORF	em02
FBtr0075232	FBtr0075232_127	0.278524	uORF	em02
FBtr0075232	FBtr0075232_153	-0.417717	uORF	em02
FBtr0075232	FBtr0075232_159	-0.348477	uORF	em02
FBtr0075275	FBtr0075275_107	0.674097	uORF	em02
FBtr0075275	FBtr0075275_196	-0.2018	uORF	em02
FBtr0075275	FBtr0075275_57	3.71632	uORF	em02
FBtr0075279	FBtr0075279_145	-0.711812	uORF	em02
FBtr0075279	FBtr0075279_164	-0.97286	uORF	em02
FBtr0075293	FBtr0075293_95	0.4384	uORF	em02
FBtr0075309	FBtr0075309_9	-0.399084	uORF	em02
FBtr0075311	FBtr0075311_193	1.07348	uORF	em02
FBtr0075326	FBtr0075326_45	-2.65401	uORF	em02
FBtr0075326	FBtr0075326_80	-1.33909	uORF	em02
FBtr0075330	FBtr0075330_67	1.55598	uORF	em02
FBtr0075332	FBtr0075332_109	-0.347848	uORF	em02
FBtr0075332	FBtr0075332_116	-1.1822	uORF	em02
FBtr0075332	FBtr0075332_245	-0.0626375	uORF	em02
FBtr0075332	FBtr0075332_251	-0.0896392	uORF	em02
FBtr0075332	FBtr0075332_346	0.246236	uORF	em02
FBtr0075332	FBtr0075332_354	0.307273	uORF	em02
FBtr0075332	FBtr0075332_360	0.255405	uORF	em02
FBtr0075332	FBtr0075332_402	1.37226	uORF	em02
FBtr0075332	FBtr0075332_543	-0.162064	uORF	em02
FBtr0075332	FBtr0075332_611	-0.86601	uORF	em02
FBtr0075332	FBtr0075332_622	-0.936402	uORF	em02
FBtr0075332	FBtr0075332_640	-1.2328	uORF	em02
FBtr0075337	FBtr0075337_52	1.8739	uORF	em02
FBtr0075346	FBtr0075346_88	1.41307	uORF	em02
FBtr0075347	FBtr0075347_1	-1.39902	uORF	em02
FBtr0075354	FBtr0075354_112	-2.68854	uORF	em02
FBtr0075408	FBtr0075408_233	3.5077	uORF	em02
FBtr0075412	FBtr0075412_255	1.6212	uORF	em02
FBtr0075428	FBtr0075428_90	1.73013	uORF	em02
FBtr0075435	FBtr0075435_136	4	uORF	em02
FBtr0075435	FBtr0075435_236	1.35575	uORF	em02
FBtr0075435	FBtr0075435_347	2.85079	uORF	em02
FBtr0075452	FBtr0075452_42	0.507792	uORF	em02
FBtr0075457	FBtr0075457_138	-1.17259	uORF	em02
FBtr0075459	FBtr0075459_2	1.30135	uORF	em02
FBtr0075459	FBtr0075459_260	4	uORF	em02
FBtr0075459	FBtr0075459_31	4	uORF	em02
FBtr0075459	FBtr0075459_38	-3.13599	uORF	em02
FBtr0075459	FBtr0075459_97	-3.86848	uORF	em02
FBtr0075497	FBtr0075497_28	-0.709279	uORF	em02
FBtr0075497	FBtr0075497_37	-0.808693	uORF	em02
FBtr0075499	FBtr0075499_206	2.46148	uORF	em02
FBtr0075505	FBtr0075505_111	1.3837	uORF	em02
FBtr0075510	FBtr0075510_170	0.390667	uORF	em02
FBtr0075510	FBtr0075510_176	0.228506	uORF	em02
FBtr0075512	FBtr0075512_27	1.21886	uORF	em02
FBtr0075512	FBtr0075512_39	0.770816	uORF	em02
FBtr0075522	FBtr0075522_61	-0.0995408	uORF	em02
FBtr0075536	FBtr0075536_14	4	uORF	em02
FBtr0075547	FBtr0075547_30	-0.448008	uORF	em02
FBtr0075547	FBtr0075547_39	-0.998554	uORF	em02
FBtr0075547	FBtr0075547_8	-1.98406	uORF	em02
FBtr0075547	FBtr0075547_91	-0.52465	uORF	em02
FBtr0075562	FBtr0075562_135	-0.208503	uORF	em02
FBtr0075562	FBtr0075562_153	-0.11003	uORF	em02
FBtr0075562	FBtr0075562_198	4	uORF	em02
FBtr0075579	FBtr0075579_98	3.07891	uORF	em02
FBtr0075604	FBtr0075604_12	-0.854747	uORF	em02
FBtr0075604	FBtr0075604_211	4	uORF	em02
FBtr0075604	FBtr0075604_23	1.3923	uORF	em02
FBtr0075604	FBtr0075604_258	0.734771	uORF	em02
FBtr0075604	FBtr0075604_266	2.98695	uORF	em02
FBtr0075607	FBtr0075607_398	4	uORF	em02
FBtr0075607	FBtr0075607_53	4	uORF	em02
FBtr0075626	FBtr0075626_159	-0.183595	uORF	em02
FBtr0075626	FBtr0075626_171	-0.41099	uORF	em02
FBtr0075626	FBtr0075626_219	0.213878	uORF	em02
FBtr0075626	FBtr0075626_291	-1.23609	uORF	em02
FBtr0075626	FBtr0075626_30	4	uORF	em02
FBtr0075626	FBtr0075626_72	1.93989	uORF	em02
FBtr0075641	FBtr0075641_168	0.18584	uORF	em02
FBtr0075645	FBtr0075645_74	-3.94121	uORF	em02
FBtr0075651	FBtr0075651_116	-0.147558	uORF	em02
FBtr0075651	FBtr0075651_212	0.159814	uORF	em02
FBtr0075651	FBtr0075651_232	-1.5246	uORF	em02
FBtr0075651	FBtr0075651_261	-1.27355	uORF	em02
FBtr0075651	FBtr0075651_359	0.0882849	uORF	em02
FBtr0075651	FBtr0075651_61	-0.150649	uORF	em02
FBtr0075657	FBtr0075657_149	-0.04585	uORF	em02
FBtr0075657	FBtr0075657_17	0.145217	uORF	em02
FBtr0075657	FBtr0075657_219	0.352455	uORF	em02
FBtr0075657	FBtr0075657_274	-1.44091	uORF	em02
FBtr0075679	FBtr0075679_125	-0.637339	uORF	em02
FBtr0075679	FBtr0075679_191	-0.21343	uORF	em02
FBtr0075679	FBtr0075679_222	0.810883	uORF	em02
FBtr0075691	FBtr0075691_49	-0.0771744	uORF	em02
FBtr0075693	FBtr0075693_147	4	uORF	em02
FBtr0075693	FBtr0075693_173	-3.45462	uORF	em02
FBtr0075693	FBtr0075693_53	0.105185	uORF	em02
FBtr0075693	FBtr0075693_87	0.67264	uORF	em02
FBtr0075715	FBtr0075715_53	1.18584	uORF	em02
FBtr0075724	FBtr0075724_281	2.59299	uORF	em02
FBtr0075724	FBtr0075724_289	2.88391	uORF	em02
FBtr0075756	FBtr0075756_99	0.450419	uORF	em02
FBtr0075759	FBtr0075759_83	0.427719	uORF	em02
FBtr0075768	FBtr0075768_129	1.37348	uORF	em02
FBtr0075768	FBtr0075768_154	-0.121571	uORF	em02
FBtr0075768	FBtr0075768_418	1.74194	uORF	em02
FBtr0075769	FBtr0075769_353	-0.292171	uORF	em02
FBtr0075769	FBtr0075769_396	0.408253	uORF	em02
FBtr0075769	FBtr0075769_516	-0.136061	uORF	em02
FBtr0075769	FBtr0075769_98	-0.0510306	uORF	em02
FBtr0075774	FBtr0075774_118	0.700468	uORF	em02
FBtr0075775	FBtr0075775_121	-0.895796	uORF	em02
FBtr0075775	FBtr0075775_670	-2.4937	uORF	em02
FBtr0075777	FBtr0075777_25	0.770776	uORF	em02
FBtr0075778	FBtr0075778_251	3.08625	uORF	em02
FBtr0075778	FBtr0075778_302	2.40817	uORF	em02
FBtr0075781	FBtr0075781_118	-0.333576	uORF	em02
FBtr0075781	FBtr0075781_19	-0.984057	uORF	em02
FBtr0075781	FBtr0075781_26	-0.737727	uORF	em02
FBtr0075784	FBtr0075784_177	2.54599	uORF	em02
FBtr0075784	FBtr0075784_183	0.800201	uORF	em02
FBtr0075784	FBtr0075784_55	-0.366675	uORF	em02
FBtr0075784	FBtr0075784_87	0.256944	uORF	em02
FBtr0075812	FBtr0075812_223	-1.74527	uORF	em02
FBtr0075812	FBtr0075812_366	-0.498084	uORF	em02
FBtr0075812	FBtr0075812_406	-0.889686	uORF	em02
FBtr0075812	FBtr0075812_528	-0.644513	uORF	em02
FBtr0075812	FBtr0075812_534	-0.695816	uORF	em02
FBtr0075812	FBtr0075812_578	-1.12692	uORF	em02
FBtr0075813	FBtr0075813_151	-2.57714	uORF	em02
FBtr0075813	FBtr0075813_184	-2.31663	uORF	em02
FBtr0075897	FBtr0075897_27	-3.18959	uORF	em02
FBtr0075898	FBtr0075898_105	-0.689542	uORF	em02
FBtr0075898	FBtr0075898_51	-0.413597	uORF	em02
FBtr0075913	FBtr0075913_171	-0.0795521	uORF	em02
FBtr0075929	FBtr0075929_127	-1.39638	uORF	em02
FBtr0075942	FBtr0075942_241	4	uORF	em02
FBtr0075942	FBtr0075942_247	4	uORF	em02
FBtr0075948	FBtr0075948_100	-0.289281	uORF	em02
FBtr0075948	FBtr0075948_130	-0.128398	uORF	em02
FBtr0075948	FBtr0075948_172	0.588919	uORF	em02
FBtr0075948	FBtr0075948_195	0.419727	uORF	em02
FBtr0075948	FBtr0075948_217	0.484454	uORF	em02
FBtr0075948	FBtr0075948_44	-0.901177	uORF	em02
FBtr0075957	FBtr0075957_98	0.564359	uORF	em02
FBtr0075961	FBtr0075961_59	-0.229194	uORF	em02
FBtr0075968	FBtr0075968_57	0.990557	uORF	em02
FBtr0075981	FBtr0075981_139	0.059394	uORF	em02
FBtr0075982	FBtr0075982_176	-1.8598	uORF	em02
FBtr0075997	FBtr0075997_100	-1.39909	uORF	em02
FBtr0075998	FBtr0075998_287	3.75869	uORF	em02
FBtr0076006	FBtr0076006_47	2.48894	uORF	em02
FBtr0076049	FBtr0076049_93	0.922873	uORF	em02
FBtr0076061	FBtr0076061_35	0.278932	uORF	em02
FBtr0076061	FBtr0076061_46	0.863883	uORF	em02
FBtr0076075	FBtr0076075_207	0.475111	uORF	em02
FBtr0076075	FBtr0076075_261	0.409886	uORF	em02
FBtr0076075	FBtr0076075_284	0.107268	uORF	em02
FBtr0076075	FBtr0076075_292	-0.273882	uORF	em02
FBtr0076075	FBtr0076075_315	-0.320833	uORF	em02
FBtr0076077	FBtr0076077_48	-0.506779	uORF	em02
FBtr0076077	FBtr0076077_88	-1.42839	uORF	em02
FBtr0076077	FBtr0076077_9	-0.559788	uORF	em02
FBtr0076093	FBtr0076093_396	-1.4359	uORF	em02
FBtr0076093	FBtr0076093_478	0.653364	uORF	em02
FBtr0076093	FBtr0076093_604	1.89133	uORF	em02
FBtr0076093	FBtr0076093_619	2.27896	uORF	em02
FBtr0076107	FBtr0076107_39	3.07827	uORF	em02
FBtr0076108	FBtr0076108_107	1.02389	uORF	em02
FBtr0076108	FBtr0076108_89	0.780409	uORF	em02
FBtr0076114	FBtr0076114_66	-0.814159	uORF	em02
FBtr0076134	FBtr0076134_24	-0.0929796	uORF	em02
FBtr0076134	FBtr0076134_4	0.133261	uORF	em02
FBtr0076146	FBtr0076146_152	1.99395	uORF	em02
FBtr0076146	FBtr0076146_158	1.92457	uORF	em02
FBtr0076146	FBtr0076146_315	-0.833857	uORF	em02
FBtr0076146	FBtr0076146_362	1.50233	uORF	em02
FBtr0076146	FBtr0076146_375	1.88217	uORF	em02
FBtr0076161	FBtr0076161_180	-1.51975	uORF	em02
FBtr0076161	FBtr0076161_186	-1.51975	uORF	em02
FBtr0076165	FBtr0076165_103	-2.88238	uORF	em02
FBtr0076165	FBtr0076165_108	-3.86444	uORF	em02
FBtr0076168	FBtr0076168_177	1.03076	uORF	em02
FBtr0076168	FBtr0076168_235	-0.482436	uORF	em02
FBtr0076168	FBtr0076168_365	-0.126286	uORF	em02
FBtr0076168	FBtr0076168_72	-0.377412	uORF	em02
FBtr0076181	FBtr0076181_6	1.68095	uORF	em02
FBtr0076186	FBtr0076186_39	0.929079	uORF	em02
FBtr0076189	FBtr0076189_1	0.135231	uORF	em02
FBtr0076189	FBtr0076189_384	-0.950729	uORF	em02
FBtr0076189	FBtr0076189_420	-1.36528	uORF	em02
FBtr0076189	FBtr0076189_454	-2.86474	uORF	em02
FBtr0076189	FBtr0076189_471	-0.890101	uORF	em02
FBtr0076189	FBtr0076189_621	-0.0110297	uORF	em02
FBtr0076189	FBtr0076189_626	-0.585515	uORF	em02
FBtr0076189	FBtr0076189_713	-1.72198	uORF	em02
FBtr0076203	FBtr0076203_19	0.0603859	uORF	em02
FBtr0076203	FBtr0076203_95	1.04146	uORF	em02
FBtr0076205	FBtr0076205_131	-0.0205896	uORF	em02
FBtr0076205	FBtr0076205_19	1.82339	uORF	em02
FBtr0076208	FBtr0076208_101	-2.51975	uORF	em02
FBtr0076208	FBtr0076208_71	1.60092	uORF	em02
FBtr0076208	FBtr0076208_81	1.50781	uORF	em02
FBtr0076208	FBtr0076208_96	-3.84161	uORF	em02
FBtr0076210	FBtr0076210_70	0.0420816	uORF	em02
FBtr0076210	FBtr0076210_73	0.0945964	uORF	em02
FBtr0076236	FBtr0076236_247	0.0369228	uORF	em02
FBtr0076236	FBtr0076236_262	0.132374	uORF	em02
FBtr0076236	FBtr0076236_287	-0.250079	uORF	em02
FBtr0076236	FBtr0076236_547	-0.471611	uORF	em02
FBtr0076236	FBtr0076236_632	1.34632	uORF	em02
FBtr0076236	FBtr0076236_691	1.21887	uORF	em02
FBtr0076236	FBtr0076236_930	1.90353	uORF	em02
FBtr0076241	FBtr0076241_44	2.45855	uORF	em02
FBtr0076242	FBtr0076242_39	-0.197437	uORF	em02
FBtr0076255	FBtr0076255_59	0.759723	uORF	em02
FBtr0076269	FBtr0076269_7	0.53308	uORF	em02
FBtr0076277	FBtr0076277_154	0.738642	uORF	em02
FBtr0076319	FBtr0076319_537	1.08332	uORF	em02
FBtr0076319	FBtr0076319_702	-0.486016	uORF	em02
FBtr0076319	FBtr0076319_868	-0.798308	uORF	em02
FBtr0076319	FBtr0076319_931	-1.21019	uORF	em02
FBtr0076343	FBtr0076343_307	-0.340685	uORF	em02
FBtr0076354	FBtr0076354_54	1.73308	uORF	em02
FBtr0076372	FBtr0076372_107	2.45131	uORF	em02
FBtr0076372	FBtr0076372_24	2.41095	uORF	em02
FBtr0076382	FBtr0076382_63	1.77077	uORF	em02
FBtr0076383	FBtr0076383_61	1.5451	uORF	em02
FBtr0076392	FBtr0076392_146	0.47536	uORF	em02
FBtr0076392	FBtr0076392_188	3.36539	uORF	em02
FBtr0076403	FBtr0076403_60	2.71743	uORF	em02
FBtr0076403	FBtr0076403_96	1.65977	uORF	em02
FBtr0076413	FBtr0076413_83	0.378882	uORF	em02
FBtr0076429	FBtr0076429_103	-2.68405	uORF	em02
FBtr0076429	FBtr0076429_109	4	uORF	em02
FBtr0076429	FBtr0076429_268	4	uORF	em02
FBtr0076461	FBtr0076461_12	0.306464	uORF	em02
FBtr0076468	FBtr0076468_102	0.670059	uORF	em02
FBtr0076468	FBtr0076468_197	1.01062	uORF	em02
FBtr0076468	FBtr0076468_301	2.06386	uORF	em02
FBtr0076468	FBtr0076468_317	1.69399	uORF	em02
FBtr0076468	FBtr0076468_361	2.3044	uORF	em02
FBtr0076468	FBtr0076468_45	1.15833	uORF	em02
FBtr0076468	FBtr0076468_72	0.950332	uORF	em02
FBtr0076475	FBtr0076475_131	0.544298	uORF	em02
FBtr0076475	FBtr0076475_79	2.30513	uORF	em02
FBtr0076486	FBtr0076486_102	1.36641	uORF	em02
FBtr0076486	FBtr0076486_181	0.373899	uORF	em02
FBtr0076486	FBtr0076486_191	-3.09172	uORF	em02
FBtr0076486	FBtr0076486_249	1.7078	uORF	em02
FBtr0076486	FBtr0076486_289	-0.877854	uORF	em02
FBtr0076486	FBtr0076486_297	-0.136068	uORF	em02
FBtr0076486	FBtr0076486_318	0.528746	uORF	em02
FBtr0076486	FBtr0076486_333	0.57052	uORF	em02
FBtr0076486	FBtr0076486_476	-0.749598	uORF	em02
FBtr0076486	FBtr0076486_54	1.99583	uORF	em02
FBtr0076486	FBtr0076486_549	-0.0816086	uORF	em02
FBtr0076486	FBtr0076486_671	-2.68793	uORF	em02
FBtr0076486	FBtr0076486_702	1.65674	uORF	em02
FBtr0076494	FBtr0076494_300	0.600896	uORF	em02
FBtr0076494	FBtr0076494_430	-1.09097	uORF	em02
FBtr0076494	FBtr0076494_575	1.66247	uORF	em02
FBtr0076494	FBtr0076494_97	0.528805	uORF	em02
FBtr0076498	FBtr0076498_2	4	uORF	em02
FBtr0076499	FBtr0076499_51	0.762291	uORF	em02
FBtr0076503	FBtr0076503_206	4	uORF	em02
FBtr0076504	FBtr0076504_3	-0.103646	uORF	em02
FBtr0076515	FBtr0076515_328	-0.46183	uORF	em02
FBtr0076515	FBtr0076515_80	-1.77552	uORF	em02
FBtr0076520	FBtr0076520_97	-1.22784	uORF	em02
FBtr0076524	FBtr0076524_10	-3.42661	uORF	em02
FBtr0076524	FBtr0076524_33	1.73011	uORF	em02
FBtr0076537	FBtr0076537_62	0.802579	uORF	em02
FBtr0076547	FBtr0076547_14	-0.00676393	uORF	em02
FBtr0076547	FBtr0076547_141	0.448882	uORF	em02
FBtr0076570	FBtr0076570_72	1.60079	uORF	em02
FBtr0076583	FBtr0076583_273	2.68831	uORF	em02
FBtr0076583	FBtr0076583_278	4	uORF	em02
FBtr0076598	FBtr0076598_30	2.09686	uORF	em02
FBtr0076602	FBtr0076602_67	-1.25366	uORF	em02
FBtr0076620	FBtr0076620_21	0.54844	uORF	em02
FBtr0076620	FBtr0076620_8	1.54841	uORF	em02
FBtr0076621	FBtr0076621_255	0.408216	uORF	em02
FBtr0076621	FBtr0076621_99	-0.216898	uORF	em02
FBtr0076624	FBtr0076624_102	-0.129399	uORF	em02
FBtr0076624	FBtr0076624_118	0.98966	uORF	em02
FBtr0076624	FBtr0076624_138	0.666781	uORF	em02
FBtr0076624	FBtr0076624_233	2.23112	uORF	em02
FBtr0076624	FBtr0076624_433	0.980001	uORF	em02
FBtr0076624	FBtr0076624_516	-0.670405	uORF	em02
FBtr0076688	FBtr0076688_28	-1.15808	uORF	em02
FBtr0076690	FBtr0076690_52	-0.916705	uORF	em02
FBtr0076690	FBtr0076690_57	-1.31713	uORF	em02
FBtr0076710	FBtr0076710_82	-1.75901	uORF	em02
FBtr0076729	FBtr0076729_78	-2.32869	uORF	em02
FBtr0076737	FBtr0076737_7	-0.484018	uORF	em02
FBtr0076745	FBtr0076745_38	0.60085	uORF	em02
FBtr0076756	FBtr0076756_310	0.722032	uORF	em02
FBtr0076756	FBtr0076756_412	1.09736	uORF	em02
FBtr0076756	FBtr0076756_427	0.360546	uORF	em02
FBtr0076768	FBtr0076768_135	-1.35331	uORF	em02
FBtr0076768	FBtr0076768_80	0.91317	uORF	em02
FBtr0076770	FBtr0076770_57	4	uORF	em02
FBtr0076772	FBtr0076772_222	4	uORF	em02
FBtr0076772	FBtr0076772_313	-0.177276	uORF	em02
FBtr0076772	FBtr0076772_319	-0.168285	uORF	em02
FBtr0076772	FBtr0076772_322	-0.0136041	uORF	em02
FBtr0076772	FBtr0076772_333	0.907278	uORF	em02
FBtr0076772	FBtr0076772_337	0.345059	uORF	em02
FBtr0076772	FBtr0076772_357	0.382674	uORF	em02
FBtr0076772	FBtr0076772_451	0.709757	uORF	em02
FBtr0076805	FBtr0076805_219	-1.55106	uORF	em02
FBtr0076814	FBtr0076814_48	2.1213	uORF	em02
FBtr0076814	FBtr0076814_57	2.71237	uORF	em02
FBtr0076821	FBtr0076821_172	4	uORF	em02
FBtr0076821	FBtr0076821_261	0.100002	uORF	em02
FBtr0076821	FBtr0076821_352	3.79841	uORF	em02
FBtr0076821	FBtr0076821_363	-0.133754	uORF	em02
FBtr0076821	FBtr0076821_59	-0.832386	uORF	em02
FBtr0076821	FBtr0076821_94	2.00483	uORF	em02
FBtr0076835	FBtr0076835_135	-1.67174	uORF	em02
FBtr0076848	FBtr0076848_225	-0.30288	uORF	em02
FBtr0076848	FBtr0076848_237	0.190083	uORF	em02
FBtr0076851	FBtr0076851_77	0.43538	uORF	em02
FBtr0076867	FBtr0076867_498	1.51843	uORF	em02
FBtr0076867	FBtr0076867_81	3.09271	uORF	em02
FBtr0076870	FBtr0076870_128	1.05156	uORF	em02
FBtr0076870	FBtr0076870_39	-1.39241	uORF	em02
FBtr0076870	FBtr0076870_91	-1.30352	uORF	em02
FBtr0076878	FBtr0076878_1	4	uORF	em02
FBtr0076878	FBtr0076878_30	0.740556	uORF	em02
FBtr0076878	FBtr0076878_45	1.02824	uORF	em02
FBtr0076878	FBtr0076878_8	0.408839	uORF	em02
FBtr0076882	FBtr0076882_112	0.957492	uORF	em02
FBtr0076882	FBtr0076882_239	-0.446403	uORF	em02
FBtr0076882	FBtr0076882_98	4	uORF	em02
FBtr0076884	FBtr0076884_29	0.507781	uORF	em02
FBtr0076890	FBtr0076890_124	0.140402	uORF	em02
FBtr0076890	FBtr0076890_545	1.19328	uORF	em02
FBtr0076890	FBtr0076890_83	-0.428012	uORF	em02
FBtr0076890	FBtr0076890_88	-0.362256	uORF	em02
FBtr0076890	FBtr0076890_99	-0.706529	uORF	em02
FBtr0076896	FBtr0076896_23	0.176927	uORF	em02
FBtr0076897	FBtr0076897_39	-0.176718	uORF	em02
FBtr0076934	FBtr0076934_135	1.85072	uORF	em02
FBtr0076934	FBtr0076934_228	1.16632	uORF	em02
FBtr0076943	FBtr0076943_101	2.92278	uORF	em02
FBtr0076949	FBtr0076949_28	2.11185	uORF	em02
FBtr0076950	FBtr0076950_138	0.868372	uORF	em02
FBtr0076950	FBtr0076950_153	0.932097	uORF	em02
FBtr0076950	FBtr0076950_251	2.6232	uORF	em02
FBtr0076950	FBtr0076950_341	0.185839	uORF	em02
FBtr0076950	FBtr0076950_358	4	uORF	em02
FBtr0076950	FBtr0076950_414	3.34426	uORF	em02
FBtr0076950	FBtr0076950_426	3.22744	uORF	em02
FBtr0076950	FBtr0076950_524	0.811765	uORF	em02
FBtr0076968	FBtr0076968_1033	0.693543	uORF	em02
FBtr0076968	FBtr0076968_1082	-0.721004	uORF	em02
FBtr0076968	FBtr0076968_1103	0.363857	uORF	em02
FBtr0076968	FBtr0076968_112	-0.510133	uORF	em02
FBtr0076968	FBtr0076968_230	-0.362237	uORF	em02
FBtr0076968	FBtr0076968_252	-0.356424	uORF	em02
FBtr0076968	FBtr0076968_423	0.263857	uORF	em02
FBtr0076968	FBtr0076968_472	2.42528	uORF	em02
FBtr0076968	FBtr0076968_486	2.77077	uORF	em02
FBtr0076968	FBtr0076968_507	-0.223527	uORF	em02
FBtr0076968	FBtr0076968_61	1.8963	uORF	em02
FBtr0076968	FBtr0076968_871	1.95572	uORF	em02
FBtr0076968	FBtr0076968_921	-0.213114	uORF	em02
FBtr0076968	FBtr0076968_931	-0.136067	uORF	em02
FBtr0076968	FBtr0076968_981	-0.653672	uORF	em02
FBtr0076968	FBtr0076968_994	-0.0197233	uORF	em02
FBtr0076983	FBtr0076983_26	0.306158	uORF	em02
FBtr0076999	FBtr0076999_61	1.60079	uORF	em02
FBtr0077007	FBtr0077007_161	1.40815	uORF	em02
FBtr0077007	FBtr0077007_171	-0.0343778	uORF	em02
FBtr0077007	FBtr0077007_365	2.77076	uORF	em02
FBtr0077007	FBtr0077007_764	2.04349	uORF	em02
FBtr0077007	FBtr0077007_839	4	uORF	em02
FBtr0077007	FBtr0077007_957	3.76811	uORF	em02
FBtr0077017	FBtr0077017_12	0.54477	uORF	em02
FBtr0077043	FBtr0077043_267	1.61604	uORF	em02
FBtr0077043	FBtr0077043_287	2.56783	uORF	em02
FBtr0077049	FBtr0077049_126	-1.39902	uORF	em02
FBtr0077049	FBtr0077049_130	1.04356	uORF	em02
FBtr0077063	FBtr0077063_189	1.16382	uORF	em02
FBtr0077064	FBtr0077064_116	-1.66216	uORF	em02
FBtr0077064	FBtr0077064_163	-0.662103	uORF	em02
FBtr0077064	FBtr0077064_53	1.84887	uORF	em02
FBtr0077065	FBtr0077065_74	1.60868	uORF	em02
FBtr0077074	FBtr0077074_166	0.88102	uORF	em02
FBtr0077082	FBtr0077082_1637	-1.02048	uORF	em02
FBtr0077082	FBtr0077082_1731	2.6306	uORF	em02
FBtr0077082	FBtr0077082_1832	1.31138	uORF	em02
FBtr0077082	FBtr0077082_848	-3.8416	uORF	em02
FBtr0077082	FBtr0077082_905	1.04356	uORF	em02
FBtr0077085	FBtr0077085_101	-1.67172	uORF	em02
FBtr0077085	FBtr0077085_73	-0.174478	uORF	em02
FBtr0077090	FBtr0077090_166	3.8582	uORF	em02
FBtr0077095	FBtr0077095_83	1.04641	uORF	em02
FBtr0077100	FBtr0077100_125	0.665275	uORF	em02
FBtr0077100	FBtr0077100_210	0.0360335	uORF	em02
FBtr0077100	FBtr0077100_271	-0.326587	uORF	em02
FBtr0077100	FBtr0077100_498	-0.132963	uORF	em02
FBtr0077112	FBtr0077112_73	-0.0258263	uORF	em02
FBtr0077116	FBtr0077116_103	-0.504862	uORF	em02
FBtr0077116	FBtr0077116_58	-0.842333	uORF	em02
FBtr0077118	FBtr0077118_5	1.92274	uORF	em02
FBtr0077123	FBtr0077123_28	-0.458507	uORF	em02
FBtr0077127	FBtr0077127_9	-2.61925	uORF	em02
FBtr0077145	FBtr0077145_120	-0.250716	uORF	em02
FBtr0077145	FBtr0077145_35	2.06497	uORF	em02
FBtr0077157	FBtr0077157_34	4	uORF	em02
FBtr0077159	FBtr0077159_239	1.63067	uORF	em02
FBtr0077159	FBtr0077159_431	0.761441	uORF	em02
FBtr0077190	FBtr0077190_107	0.0974885	uORF	em02
FBtr0077190	FBtr0077190_97	0.185843	uORF	em02
FBtr0077224	FBtr0077224_175	2.04349	uORF	em02
FBtr0077224	FBtr0077224_222	1.40819	uORF	em02
FBtr0077226	FBtr0077226_129	-0.383902	uORF	em02
FBtr0077226	FBtr0077226_31	-0.114647	uORF	em02
FBtr0077226	FBtr0077226_94	-0.95853	uORF	em02
FBtr0077227	FBtr0077227_3	-1.07985	uORF	em02
FBtr0077246	FBtr0077246_110	-1.1361	uORF	em02
FBtr0077246	FBtr0077246_338	-0.257095	uORF	em02
FBtr0077246	FBtr0077246_375	0.616686	uORF	em02
FBtr0077246	FBtr0077246_382	0.270716	uORF	em02
FBtr0077246	FBtr0077246_508	-0.498664	uORF	em02
FBtr0077246	FBtr0077246_542	-0.834893	uORF	em02
FBtr0077250	FBtr0077250_207	0.659783	uORF	em02
FBtr0077250	FBtr0077250_269	-0.70764	uORF	em02
FBtr0077259	FBtr0077259_80	2.04345	uORF	em02
FBtr0077262	FBtr0077262_314	-1.1975	uORF	em02
FBtr0077268	FBtr0077268_16	1.58639	uORF	em02
FBtr0077276	FBtr0077276_420	1.46964	uORF	em02
FBtr0077276	FBtr0077276_692	0.844816	uORF	em02
FBtr0077276	FBtr0077276_851	2.50151	uORF	em02
FBtr0077276	FBtr0077276_895	1.31061	uORF	em02
FBtr0077306	FBtr0077306_44	-2.13604	uORF	em02
FBtr0077306	FBtr0077306_56	-0.16208	uORF	em02
FBtr0077306	FBtr0077306_6	-2.17669	uORF	em02
FBtr0077319	FBtr0077319_144	0.873479	uORF	em02
FBtr0077319	FBtr0077319_201	1.50965	uORF	em02
FBtr0077319	FBtr0077319_206	1.30133	uORF	em02
FBtr0077319	FBtr0077319_41	2.42259	uORF	em02
FBtr0077319	FBtr0077319_549	-1.27399	uORF	em02
FBtr0077319	FBtr0077319_600	0.0679724	uORF	em02
FBtr0077319	FBtr0077319_603	0.0612265	uORF	em02
FBtr0077319	FBtr0077319_681	-1.26595	uORF	em02
FBtr0077319	FBtr0077319_850	-1.3459	uORF	em02
FBtr0077324	FBtr0077324_68	0.35645	uORF	em02
FBtr0077342	FBtr0077342_1021	1.58385	uORF	em02
FBtr0077342	FBtr0077342_1046	1.60818	uORF	em02
FBtr0077342	FBtr0077342_1245	0.682949	uORF	em02
FBtr0077342	FBtr0077342_144	0.600882	uORF	em02
FBtr0077342	FBtr0077342_1515	0.829715	uORF	em02
FBtr0077342	FBtr0077342_211	-1.50599	uORF	em02
FBtr0077342	FBtr0077342_500	-2.17866	uORF	em02
FBtr0077342	FBtr0077342_614	0.600893	uORF	em02
FBtr0077342	FBtr0077342_736	-2.03433	uORF	em02
FBtr0077342	FBtr0077342_792	4	uORF	em02
FBtr0077342	FBtr0077342_944	0.847332	uORF	em02
FBtr0077342	FBtr0077342_954	0.00588469	uORF	em02
FBtr0077342	FBtr0077342_98	2.59659	uORF	em02
FBtr0077344	FBtr0077344_83	-2.36256	uORF	em02
FBtr0077352	FBtr0077352_32	0.689885	uORF	em02
FBtr0077352	FBtr0077352_75	0.863932	uORF	em02
FBtr0077360	FBtr0077360_31	-1.12158	uORF	em02
FBtr0077365	FBtr0077365_14	4	uORF	em02
FBtr0077365	FBtr0077365_149	0.713375	uORF	em02
FBtr0077367	FBtr0077367_28	4	uORF	em02
FBtr0077368	FBtr0077368_288	1.55973	uORF	em02
FBtr0077368	FBtr0077368_453	0.942548	uORF	em02
FBtr0077368	FBtr0077368_456	0.213479	uORF	em02
FBtr0077368	FBtr0077368_524	0.595184	uORF	em02
FBtr0077368	FBtr0077368_561	1.49634	uORF	em02
FBtr0077369	FBtr0077369_65	0.18584	uORF	em02
FBtr0077384	FBtr0077384_211	2.95441	uORF	em02
FBtr0077384	FBtr0077384_618	-0.010056	uORF	em02
FBtr0077387	FBtr0077387_27	0.550845	uORF	em02
FBtr0077387	FBtr0077387_75	0.22367	uORF	em02
FBtr0077391	FBtr0077391_377	1.26526	uORF	em02
FBtr0077408	FBtr0077408_34	-0.399101	uORF	em02
FBtr0077412	FBtr0077412_154	-0.860927	uORF	em02
FBtr0077412	FBtr0077412_92	-1.06467	uORF	em02
FBtr0077426	FBtr0077426_196	1.18579	uORF	em02
FBtr0077426	FBtr0077426_378	0.92276	uORF	em02
FBtr0077426	FBtr0077426_40	-0.382307	uORF	em02
FBtr0077429	FBtr0077429_155	4	uORF	em02
FBtr0077429	FBtr0077429_95	4	uORF	em02
FBtr0077432	FBtr0077432_87	-2.13603	uORF	em02
FBtr0077435	FBtr0077435_41	2.71238	uORF	em02
FBtr0077439	FBtr0077439_60	3.18582	uORF	em02
FBtr0077451	FBtr0077451_56	-0.399118	uORF	em02
FBtr0077456	FBtr0077456_125	-1.26339	uORF	em02
FBtr0077456	FBtr0077456_163	-0.826308	uORF	em02
FBtr0077456	FBtr0077456_6	-0.890942	uORF	em02
FBtr0077456	FBtr0077456_98	1.39336	uORF	em02
FBtr0077460	FBtr0077460_48	2.64525	uORF	em02
FBtr0077465	FBtr0077465_276	0.501677	uORF	em02
FBtr0077477	FBtr0077477_138	-0.0927838	uORF	em02
FBtr0077479	FBtr0077479_49	0.408274	uORF	em02
FBtr0077490	FBtr0077490_279	2.1858	uORF	em02
[truncated: 137,822 more rows]
[truncated: 5,000 more columns]

## Sheet: Fig3C
Transcript_id	abs_log2Beta_CDS	Gene_class
FBtr0070026	-0.0882279	class1
FBtr0070045	0.669636	class1
FBtr0070080	0.243165	class1
FBtr0070091	-0.392343	class1
FBtr0070101	0.431184	class1
FBtr0070123	-0.156885	class1
FBtr0070139	0.670527	class1
FBtr0070182	1.08402	class1
FBtr0070200	-1.52326	class1
FBtr0070209	-0.10343	class1
FBtr0070238	-1.33681	class1
FBtr0070253	0.0233316	class1
FBtr0070277	0.18602	class1
FBtr0070308	0.540049	class1
FBtr0070317	0.362894	class1
FBtr0070318	0.0230294	class1
FBtr0070345	-0.505322	class1
FBtr0070346	0.133805	class1
FBtr0070363	0.233297	class1
FBtr0070379	0.140322	class1
FBtr0070389	-0.286228	class1
FBtr0070393	-0.767586	class1
FBtr0070401	-0.365244	class1
FBtr0070405	-0.521826	class1
FBtr0070414	0.20563	class1
FBtr0070419	0.225366	class1
FBtr0070439	-0.0921297	class1
FBtr0070479	0.209483	class1
FBtr0070494	0.103045	class1
FBtr0070507	-0.179626	class1
FBtr0070508	-0.483482	class1
FBtr0070525	-0.776506	class1
FBtr0070562	-0.576782	class1
FBtr0070569	0.657214	class1
FBtr0070586	-0.761011	class1
FBtr0070611	0.207868	class1
FBtr0070616	-0.267404	class1
FBtr0070652	-0.0696265	class1
FBtr0070671	0.0103779	class1
FBtr0070680	-0.486512	class1
FBtr0070685	0.357071	class1
FBtr0070686	0.463431	class1
FBtr0070688	0.147316	class1
FBtr0070701	-0.0194668	class1
FBtr0070713	-0.733771	class1
FBtr0070723	0.0854624	class1
FBtr0070724	-0.200628	class1
FBtr0070738	-0.138323	class1
FBtr0070742	-0.327175	class1
FBtr0070763	-0.124134	class1
FBtr0070764	0.252808	class1
FBtr0070778	-0.166182	class1
FBtr0070798	-0.138233	class1
FBtr0070804	0.294456	class1
FBtr0070807	-0.0551731	class1
FBtr0070828	0.352623	class1
FBtr0070847	-0.472589	class1
FBtr0070874	0.309373	class1
FBtr0070889	0.248388	class1
FBtr0070891	0.286199	class1
FBtr0070894	0.29692	class1
FBtr0070912	0.619563	class1
FBtr0070921	0.125805	class1
FBtr0070924	0.266042	class1
FBtr0070925	-0.278488	class1
FBtr0070930	-0.0660993	class1
FBtr0070950	-0.416751	class1
FBtr0070956	0.0907707	class1
FBtr0070959	0.0412734	class1
FBtr0070972	-0.391964	class1
FBtr0070974	0.050675	class1
FBtr0070984	0.47667	class1
FBtr0070987	0.150573	class1
FBtr0070990	-0.324456	class1
FBtr0070994	-0.0624746	class1
FBtr0071005	-0.06277	class1
FBtr0071007	-0.520265	class1
FBtr0071017	0.0728224	class1
FBtr0071020	0.482512	class1
FBtr0071036	-0.222412	class1
FBtr0071048	-0.714095	class1
FBtr0071071	0.416644	class1
FBtr0071076	-0.268424	class1
FBtr0071079	0.00456051	class1
FBtr0071112	-0.0108364	class1
FBtr0071134	-1.41265	class1
FBtr0071153	1.78362	class1
FBtr0071170	-0.387225	class1
FBtr0071183	-0.334891	class1
FBtr0071188	0.108289	class1
FBtr0071192	0.462743	class1
FBtr0071219	0.0367374	class1
FBtr0071222	-0.513165	class1
FBtr0071235	-0.458094	class1
FBtr0071253	0.0819308	class1
FBtr0071299	-0.609231	class1
FBtr0071332	-0.0848891	class1
FBtr0071349	-0.0361332	class1
FBtr0071363	0.336517	class1
FBtr0071367	-0.459674	class1
FBtr0071368	0.517758	class1
FBtr0071371	-0.0109675	class1
FBtr0071430	0.132062	class1
FBtr0071441	0.996562	class1
FBtr0071444	-0.416479	class1
FBtr0071460	-0.287451	class1
FBtr0071487	0.537526	class1
FBtr0071522	-0.151336	class1
FBtr0071526	-0.295645	class1
FBtr0071553	-0.151671	class1
FBtr0071562	-0.578109	class1
FBtr0071567	-0.385876	class1
FBtr0071573	0.134186	class1
FBtr0071583	0.208327	class1
FBtr0071590	-0.182612	class1
FBtr0071613	-0.150609	class1
FBtr0071637	-0.0784267	class1
FBtr0071641	0.11865	class1
FBtr0071671	-0.30723	class1
FBtr0071672	-0.301598	class1
FBtr0071679	-0.0609079	class1
FBtr0071686	-0.258019	class1
FBtr0071688	0.107962	class1
FBtr0071700	0.336571	class1
FBtr0071745	0.103974	class1
FBtr0071755	0.341385	class1
FBtr0071756	0.250419	class1
FBtr0071777	-0.961391	class1
FBtr0071797	-0.292574	class1
FBtr0071800	-0.363347	class1
FBtr0071811	-0.586066	class1
FBtr0071832	0.079613	class1
FBtr0071833	-0.0697401	class1
FBtr0071868	0.330456	class1
FBtr0071898	0.162509	class1
FBtr0071907	0.0547413	class1
FBtr0071922	0.0947371	class1
FBtr0071934	-0.5217	class1
FBtr0071979	-1.26495	class1
FBtr0072010	-0.423528	class1
FBtr0072012	-0.0383658	class1
FBtr0072036	0.237487	class1
FBtr0072057	0.036061	class1
FBtr0072084	-0.0308316	class1
FBtr0072085	0.0966393	class1
FBtr0072099	-0.578535	class1
FBtr0072117	-0.341206	class1
FBtr0072120	0.245371	class1
FBtr0072127	0.000979314	class1
FBtr0072129	0.0175561	class1
FBtr0072131	0.46269	class1
FBtr0072154	-0.0144845	class1
FBtr0072156	-0.560153	class1
FBtr0072160	-0.181001	class1
FBtr0072162	0.00522847	class1
FBtr0072163	0.120659	class1
FBtr0072166	0.191028	class1
FBtr0072168	-0.501456	class1
FBtr0072197	0.442278	class1
FBtr0072207	-0.0497455	class1
FBtr0072210	-0.702488	class1
FBtr0072220	-0.268092	class1
FBtr0072225	-0.0755431	class1
FBtr0072227	-0.21968	class1
FBtr0072234	-0.0470373	class1
FBtr0072239	0.0262459	class1
FBtr0072250	-0.387993	class1
FBtr0072252	0.0960648	class1
FBtr0072260	-0.171105	class1
FBtr0072262	-0.255067	class1
FBtr0072268	-0.249184	class1
FBtr0072280	-0.412599	class1
FBtr0072281	-0.186196	class1
FBtr0072287	0.0643453	class1
FBtr0072302	-0.457917	class1
FBtr0072312	-0.369237	class1
FBtr0072342	0.419379	class1
FBtr0072362	-0.580563	class1
FBtr0072364	-0.306671	class1
FBtr0072369	0.173042	class1
FBtr0072423	-0.0969822	class1
FBtr0072427	-0.157843	class1
FBtr0072429	-0.322848	class1
FBtr0072435	0.0830468	class1
FBtr0072449	-0.899219	class1
FBtr0072464	0.252608	class1
FBtr0072520	0.408763	class1
FBtr0072529	-0.836161	class1
FBtr0072557	-0.78506	class1
FBtr0072559	-0.644053	class1
FBtr0072562	0.200291	class1
FBtr0072587	-0.181082	class1
FBtr0072596	-0.331664	class1
FBtr0072602	1.80215	class1
FBtr0072619	-0.15887	class1
FBtr0072627	-0.089532	class1
FBtr0072639	0.0990862	class1
FBtr0072642	0.512646	class1
FBtr0072679	0.104324	class1
FBtr0072681	0.51531	class1
FBtr0072703	0.526077	class1
FBtr0072711	-0.363775	class1
FBtr0072712	-1.0773	class1
FBtr0072735	-0.120014	class1
FBtr0072743	-0.338263	class1
FBtr0072759	-0.394241	class1
FBtr0072767	-0.890475	class1
FBtr0072784	-0.114729	class1
FBtr0072792	-0.212628	class1
FBtr0072797	-0.0585043	class1
FBtr0072831	-0.237669	class1
FBtr0072834	0.211623	class1
FBtr0072836	-0.779282	class1
FBtr0072853	0.598603	class1
FBtr0072858	-0.559937	class1
FBtr0072866	0.204431	class1
FBtr0072901	-0.364493	class1
FBtr0072904	0.170452	class1
FBtr0072905	0.185465	class1
FBtr0072921	-0.513791	class1
FBtr0072931	1.09971	class1
FBtr0072951	-0.397074	class1
FBtr0072956	0.0432599	class1
FBtr0073011	-0.251467	class1
FBtr0073023	-0.910537	class1
FBtr0073043	0.422308	class1
FBtr0073063	-0.114258	class1
FBtr0073093	0.055444	class1
FBtr0073095	-1.1007	class1
FBtr0073108	0.609787	class1
FBtr0073114	-0.325646	class1
FBtr0073118	-0.184248	class1
FBtr0073124	0.321332	class1
FBtr0073143	0.0753785	class1
FBtr0073166	-0.195379	class1
FBtr0073173	0.280825	class1
FBtr0073176	0.32016	class1
FBtr0073185	-0.328074	class1
FBtr0073203	-0.0926354	class1
FBtr0073209	-0.256568	class1
FBtr0073211	0.129246	class1
FBtr0073215	0.0616188	class1
FBtr0073217	-0.0648485	class1
FBtr0073283	-0.506099	class1
FBtr0073287	-0.35847	class1
FBtr0073299	-0.121858	class1
FBtr0073348	0.25982	class1
FBtr0073377	-0.46439	class1
FBtr0073387	1.24317	class1
FBtr0073393	-0.241522	class1
FBtr0073394	0.365772	class1
FBtr0073409	0.202197	class1
FBtr0073448	-0.160361	class1
FBtr0073451	-0.885958	class1
FBtr0073453	0.173025	class1
FBtr0073454	0.118987	class1
FBtr0073460	-0.131503	class1
FBtr0073473	-0.0475838	class1
FBtr0073475	0.119728	class1
FBtr0073481	-0.338199	class1
FBtr0073482	-0.122983	class1
FBtr0073497	0.295367	class1
FBtr0073503	0.249835	class1
FBtr0073540	0.411714	class1
FBtr0073542	-0.472214	class1
FBtr0073579	0.169212	class1
FBtr0073590	0.188514	class1
FBtr0073607	-0.102872	class1
FBtr0073660	0.475389	class1
FBtr0073669	0.00360959	class1
FBtr0073678	-0.132965	class1
FBtr0073683	-0.0668878	class1
FBtr0073691	0.30845	class1
FBtr0073695	-0.00570116	class1
FBtr0073704	0.207756	class1
FBtr0073720	0.154456	class1
FBtr0073724	0.236151	class1
FBtr0073725	-0.377505	class1
FBtr0073754	0.0427298	class1
FBtr0073776	0.298243	class1
FBtr0073779	-0.00866767	class1
FBtr0073834	-0.390851	class1
FBtr0073841	0.0968301	class1
FBtr0073844	-0.672942	class1
FBtr0073846	-0.448147	class1
FBtr0073900	-0.489603	class1
FBtr0073908	0.353207	class1
FBtr0073923	-0.0718752	class1
FBtr0073939	0.375263	class1
FBtr0073940	0.0582147	class1
FBtr0073946	-0.858139	class1
FBtr0073970	0.193605	class1
FBtr0073992	0.19841	class1
FBtr0074011	-0.397564	class1
FBtr0074054	-0.138556	class1
FBtr0074085	0.341964	class1
FBtr0074097	0.00257339	class1
FBtr0074104	0.215531	class1
FBtr0074106	-0.271134	class1
FBtr0074125	0.270157	class1
FBtr0074129	0.298297	class1
FBtr0074134	-0.15717	class1
FBtr0074135	0.350912	class1
FBtr0074140	0.0111395	class1
FBtr0074144	0.450162	class1
FBtr0074159	0.0807278	class1
FBtr0074166	0.172743	class1
FBtr0074178	-0.20417	class1
FBtr0074179	-0.24658	class1
FBtr0074202	-0.224707	class1
FBtr0074203	-0.374185	class1
FBtr0074206	0.360939	class1
FBtr0074209	-0.742332	class1
FBtr0074237	0.0373619	class1
FBtr0074241	-0.0740623	class1
FBtr0074250	-0.413128	class1
FBtr0074251	-0.43838	class1
FBtr0074255	-0.544342	class1
FBtr0074261	-0.0350315	class1
FBtr0074294	-0.165255	class1
FBtr0074334	0.0837224	class1
FBtr0074344	-0.727142	class1
FBtr0074348	-0.335978	class1
FBtr0074350	-0.617309	class1
FBtr0074357	-0.446149	class1
FBtr0074359	-0.449984	class1
FBtr0074383	0.331072	class1
FBtr0074386	-0.681903	class1
FBtr0074417	0.0647295	class1
FBtr0074480	-0.197204	class1
FBtr0074486	-0.155707	class1
FBtr0074487	0.40383	class1
FBtr0074492	-0.0111574	class1
FBtr0074527	0.275486	class1
FBtr0074540	1.05576	class1
FBtr0074546	0.337112	class1
FBtr0074555	-0.362632	class1
FBtr0074612	-0.645588	class1
FBtr0074617	-0.185756	class1
FBtr0074623	-0.203289	class1
FBtr0074647	0.304592	class1
FBtr0074655	-0.02645	class1
FBtr0074666	0.435775	class1
FBtr0074683	-0.463473	class1
FBtr0074684	-0.691396	class1
FBtr0074691	-0.740557	class1
FBtr0074750	-0.227631	class1
FBtr0074754	-0.688043	class1
FBtr0074759	-0.391099	class1
FBtr0074760	-1.24264	class1
FBtr0074771	0.118421	class1
FBtr0074790	0.524413	class1
FBtr0074795	-0.14987	class1
FBtr0074810	0.699961	class1
FBtr0074837	-0.26049	class1
FBtr0074846	0.035175	class1
FBtr0074847	0.317735	class1
FBtr0074848	0.164301	class1
FBtr0074864	-0.760289	class1
FBtr0074870	0.00904717	class1
FBtr0074873	0.439808	class1
FBtr0074881	0.110582	class1
FBtr0074891	-0.33111	class1
FBtr0074902	0.22577	class1
FBtr0074903	0.26708	class1
FBtr0074911	0.389857	class1
FBtr0074917	0.0978321	class1
FBtr0074918	-0.131712	class1
FBtr0074947	0.158291	class1
FBtr0074953	0.105736	class1
FBtr0074963	0.1981	class1
FBtr0074991	0.0543939	class1
FBtr0075018	0.633592	class1
FBtr0075019	-0.0316657	class1
FBtr0075022	-0.400192	class1
FBtr0075037	-0.327824	class1
FBtr0075039	-0.280185	class1
FBtr0075062	-0.12673	class1
FBtr0075077	-0.697628	class1
FBtr0075122	-1.48921	class1
FBtr0075133	0.00432385	class1
FBtr0075136	-0.110569	class1
FBtr0075144	-0.0298933	class1
FBtr0075152	-0.022281	class1
FBtr0075161	0.643597	class1
FBtr0075186	0.113008	class1
FBtr0075215	0.126021	class1
FBtr0075219	-0.303325	class1
FBtr0075220	0.156777	class1
FBtr0075228	-0.544784	class1
FBtr0075229	-0.168762	class1
FBtr0075241	-0.349757	class1
FBtr0075275	-0.286089	class1
FBtr0075279	-0.0274327	class1
FBtr0075293	-0.378758	class1
FBtr0075311	-0.0983868	class1
FBtr0075330	0.0362727	class1
FBtr0075337	0.00520495	class1
FBtr0075354	-1.4292	class1
FBtr0075408	0.0529601	class1
FBtr0075428	-0.389102	class1
FBtr0075457	0.0280964	class1
FBtr0075497	1.0439	class1
FBtr0075499	0.0831956	class1
FBtr0075505	-0.312246	class1
FBtr0075510	0.255316	class1
FBtr0075579	0.0833322	class1
FBtr0075604	0.202676	class1
FBtr0075641	0.0350389	class1
FBtr0075655	0.921347	class1
FBtr0075712	0.378789	class1
FBtr0075715	-0.664714	class1
FBtr0075724	-0.635779	class1
FBtr0075753	0.0516427	class1
FBtr0075756	-0.289254	class1
FBtr0075759	0.0856114	class1
FBtr0075775	0.131165	class1
FBtr0075777	-0.789132	class1
FBtr0075778	0.577639	class1
FBtr0075781	-0.210605	class1
FBtr0075813	0.124405	class1
FBtr0075818	0.452006	class1
FBtr0075855	0.0358298	class1
FBtr0075908	0.220038	class1
FBtr0075913	-0.104298	class1
FBtr0075929	0.120513	class1
FBtr0075948	-0.0778169	class1
FBtr0075976	0.350077	class1
FBtr0075980	-0.687845	class1
FBtr0075982	-0.276203	class1
FBtr0075997	-0.304848	class1
FBtr0075998	0.0200259	class1
FBtr0076000	-0.0261724	class1
FBtr0076080	0.290258	class1
FBtr0076093	-0.261144	class1
FBtr0076108	0.477766	class1
FBtr0076114	0.639782	class1
FBtr0076133	-0.37347	class1
FBtr0076146	-0.105949	class1
FBtr0076165	-0.317666	class1
FBtr0076186	-0.194382	class1
FBtr0076203	-0.109325	class1
FBtr0076236	0.308051	class1
FBtr0076242	-1.4756	class1
FBtr0076255	0.0969356	class1
FBtr0076277	0.220706	class1
FBtr0076316	-4.6572	class1
FBtr0076354	-0.348059	class1
FBtr0076382	0.305663	class1
FBtr0076383	-0.352704	class1
FBtr0076403	-0.283512	class1
FBtr0076413	0.113294	class1
FBtr0076416	-0.0450019	class1
FBtr0076429	0.565313	class1
FBtr0076461	0.00137649	class1
FBtr0076468	0.10852	class1
FBtr0076515	-0.212134	class1
FBtr0076520	-0.0196582	class1
FBtr0076524	0.376135	class1
FBtr0076530	-0.112646	class1
FBtr0076553	-0.0154451	class1
FBtr0076556	-1.0389	class1
FBtr0076583	0.31167	class1
FBtr0076602	-0.185772	class1
FBtr0076621	-0.450046	class1
FBtr0076624	0.017398	class1
FBtr0076656	-0.351391	class1
FBtr0076688	0.232919	class1
FBtr0076690	-0.149041	class1
FBtr0076710	0.172988	class1
FBtr0076732	-0.173438	class1
FBtr0076783	-0.143373	class1
FBtr0076795	0.148031	class1
FBtr0076811	-0.0218009	class1
FBtr0076851	-0.117786	class1
FBtr0076888	-0.0235267	class1
FBtr0076890	-0.411958	class1
FBtr0076896	-0.242984	class1
FBtr0076934	0.359085	class1
FBtr0076943	0.310849	class1
FBtr0076945	0.12631	class1
FBtr0076949	-0.605268	class1
FBtr0076950	-0.277273	class1
FBtr0076958	0.342954	class1
FBtr0077007	-0.35495	class1
FBtr0077010	-0.0180064	class1
FBtr0077012	-0.295334	class1
FBtr0077014	0.496012	class1
FBtr0077037	0.482879	class1
FBtr0077043	0.62406	class1
FBtr0077049	0.770673	class1
FBtr0077085	0.43837	class1
FBtr0077095	0.292337	class1
FBtr0077100	0.00270701	class1
FBtr0077112	0.319825	class1
FBtr0077157	-0.0649817	class1
FBtr0077167	-0.503303	class1
FBtr0077168	-0.467984	class1
FBtr0077227	0.308095	class1
FBtr0077268	-0.0486251	class1
FBtr0077303	0.481244	class1
FBtr0077319	-0.359619	class1
FBtr0077360	-0.511455	class1
FBtr0077384	0.0295625	class1
FBtr0077387	-0.1688	class1
FBtr0077391	-0.39455	class1
FBtr0077394	-0.107156	class1
FBtr0077396	0.28956	class1
FBtr0077408	-0.0841932	class1
FBtr0077412	-0.137355	class1
FBtr0077418	0.297175	class1
FBtr0077426	-0.352755	class1
FBtr0077429	0.190995	class1
FBtr0077431	-0.129386	class1
FBtr0077432	-0.150355	class1
FBtr0077460	-0.111181	class1
FBtr0077465	-0.256215	class1
FBtr0077504	-0.158663	class1
FBtr0077537	-0.0794653	class1
FBtr0077543	-0.637444	class1
FBtr0077568	0.409772	class1
FBtr0077580	-2.63005	class1
FBtr0077583	-1.55843	class1
FBtr0077625	0.0191165	class1
FBtr0077629	-0.176425	class1
FBtr0077646	-0.698587	class1
FBtr0077666	0.51657	class1
FBtr0077670	-0.605323	class1
FBtr0077671	0.838554	class1
FBtr0077685	-0.0587973	class1
FBtr0077686	-0.44753	class1
FBtr0077720	-0.097848	class1
FBtr0077726	0.0784764	class1
FBtr0077731	0.202513	class1
FBtr0077736	-3.32976	class1
FBtr0077747	-0.760914	class1
FBtr0077762	-0.106952	class1
FBtr0077767	0.168948	class1
FBtr0077768	-0.00141884	class1
FBtr0077782	0.417144	class1
FBtr0077813	0.244387	class1
FBtr0077822	-0.140532	class1
FBtr0077831	0.401907	class1
FBtr0077840	0.00169826	class1
FBtr0077850	-0.0953804	class1
FBtr0077885	-0.0581584	class1
FBtr0077905	0.160168	class1
FBtr0077911	-0.153843	class1
FBtr0077921	0.955708	class1
FBtr0077949	-0.0865091	class1
FBtr0077953	-0.179338	class1
FBtr0077956	-0.221975	class1
FBtr0077961	-0.292208	class1
FBtr0077972	-0.202826	class1
FBtr0077980	0.298413	class1
FBtr0077989	-0.41003	class1
FBtr0078039	-0.238671	class1
FBtr0078045	-0.335051	class1
FBtr0078050	0.148524	class1
FBtr0078060	0.141093	class1
FBtr0078062	0.315411	class1
FBtr0078066	-0.035649	class1
FBtr0078068	-0.249171	class1
FBtr0078069	0.724057	class1
FBtr0078087	-0.14027	class1
FBtr0078100	-0.666727	class1
FBtr0078117	0.00427725	class1
FBtr0078129	0.274897	class1
FBtr0078140	0.0394762	class1
FBtr0078153	0.162433	class1
FBtr0078156	-0.188891	class1
FBtr0078192	-0.594305	class1
FBtr0078195	0.0104162	class1
FBtr0078198	-0.291382	class1
FBtr0078203	-0.351656	class1
FBtr0078213	-0.0820937	class1
FBtr0078235	-0.119744	class1
FBtr0078245	-0.0492961	class1
FBtr0078256	-0.0902168	class1
FBtr0078263	-0.0576672	class1
FBtr0078267	0.268285	class1
FBtr0078277	-0.108203	class1
FBtr0078280	-0.328395	class1
FBtr0078287	0.153363	class1
FBtr0078289	0.110615	class1
FBtr0078305	-0.308165	class1
FBtr0078309	0.254432	class1
FBtr0078311	-0.121728	class1
FBtr0078323	0.252979	class1
FBtr0078324	0.261133	class1
FBtr0078327	-0.0157294	class1
FBtr0078351	-0.457852	class1
FBtr0078382	-0.102216	class1
FBtr0078389	0.0902016	class1
FBtr0078397	0.633111	class1
FBtr0078399	-0.50149	class1
FBtr0078404	-0.0417668	class1
FBtr0078407	0.572774	class1
FBtr0078450	0.218191	class1
FBtr0078462	0.112169	class1
FBtr0078471	0.265772	class1
FBtr0078480	0.851989	class1
FBtr0078486	0.552378	class1
FBtr0078508	-0.60566	class1
FBtr0078510	-0.0657879	class1
FBtr0078511	0.289929	class1
FBtr0078512	0.324569	class1
FBtr0078530	-0.381897	class1
FBtr0078571	0.18804	class1
FBtr0078631	-0.244356	class1
FBtr0078642	0.137679	class1
FBtr0078647	0.563973	class1
FBtr0078652	-0.77267	class1
FBtr0078665	-0.238479	class1
FBtr0078666	-0.0874234	class1
FBtr0078669	0.392811	class1
FBtr0078677	0.0163011	class1
FBtr0078678	-0.204511	class1
FBtr0078713	-0.254972	class1
FBtr0078727	-0.0957714	class1
FBtr0078736	0.0332605	class1
FBtr0078739	-0.738962	class1
FBtr0078741	0.0297052	class1
FBtr0078752	-0.379973	class1
FBtr0078754	0.322511	class1
FBtr0078756	1.13776	class1
FBtr0078764	-0.611008	class1
FBtr0078766	-0.248823	class1
FBtr0078768	-0.544859	class1
FBtr0078770	0.225685	class1
FBtr0078777	0.29703	class1
FBtr0078794	-0.584504	class1
FBtr0078803	-0.176512	class1
FBtr0078821	-1.15162	class1
FBtr0078844	0.278005	class1
FBtr0078855	-0.990559	class1
FBtr0078856	-0.229015	class1
FBtr0078868	1.23024	class1
FBtr0078875	-0.882979	class1
FBtr0078894	0.58142	class1
FBtr0078925	-0.732176	class1
FBtr0078958	0.0377339	class1
FBtr0078961	-0.24736	class1
FBtr0078985	0.445011	class1
FBtr0078991	0.252388	class1
FBtr0079004	-0.344553	class1
FBtr0079036	0.25713	class1
FBtr0079037	0.39441	class1
FBtr0079069	-0.017608	class1
FBtr0079071	0.0563869	class1
FBtr0079077	-0.0344174	class1
FBtr0079078	0.289843	class1
FBtr0079082	-0.369197	class1
FBtr0079098	0.468523	class1
FBtr0079114	-0.370425	class1
FBtr0079126	0.0662387	class1
FBtr0079135	0.00457143	class1
FBtr0079160	0.579283	class1
FBtr0079179	1.69284	class1
FBtr0079183	-0.288065	class1
FBtr0079187	0.285718	class1
FBtr0079211	0.0793657	class1
FBtr0079231	-0.155806	class1
FBtr0079238	-0.352104	class1
FBtr0079249	0.192149	class1
FBtr0079253	-0.0591027	class1
FBtr0079256	-0.470275	class1
FBtr0079257	0.510726	class1
FBtr0079262	-0.0447923	class1
FBtr0079267	0.138496	class1
FBtr0079284	-0.665223	class1
FBtr0079291	-0.195755	class1
FBtr0079303	-0.0393123	class1
FBtr0079310	-0.165631	class1
FBtr0079312	-0.080346	class1
FBtr0079324	0.917997	class1
FBtr0079342	0.413806	class1
FBtr0079355	-0.571598	class1
FBtr0079401	-0.279718	class1
FBtr0079423	-0.534145	class1
FBtr0079429	-0.273033	class1
FBtr0079468	1.08928	class1
FBtr0079477	-0.114044	class1
FBtr0079488	0.369395	class1
FBtr0079493	0.118279	class1
FBtr0079533	-0.0721366	class1
FBtr0079543	-0.00929991	class1
FBtr0079561	0.314949	class1
FBtr0079564	0.0309773	class1
FBtr0079574	-0.556961	class1
FBtr0079576	0.171463	class1
FBtr0079608	-0.483964	class1
FBtr0079613	-0.317369	class1
FBtr0079614	-0.428313	class1
FBtr0079634	0.333463	class1
FBtr0079637	0.038797	class1
FBtr0079703	-0.470858	class1
FBtr0079707	0.568427	class1
FBtr0079710	0.230625	class1
FBtr0079758	-1.90519	class1
FBtr0079788	-0.265941	class1
FBtr0079806	0.261642	class1
FBtr0079809	0.0425537	class1
FBtr0079822	0.165638	class1
FBtr0079851	-0.741623	class1
FBtr0079860	-0.355033	class1
FBtr0079865	-0.186216	class1
FBtr0079879	-0.784909	class1
FBtr0079885	-0.307135	class1
FBtr0079901	-0.00573987	class1
FBtr0079924	0.097525	class1
FBtr0079932	0.132064	class1
FBtr0079953	-0.353397	class1
FBtr0079977	-0.421774	class1
FBtr0079978	-0.79118	class1
FBtr0079985	-0.227598	class1
FBtr0079987	-0.234297	class1
FBtr0079992	-0.289753	class1
FBtr0079993	0.12223	class1
FBtr0079999	0.408341	class1
FBtr0080002	-0.274678	class1
FBtr0080027	-0.0376243	class1
FBtr0080030	-0.53059	class1
FBtr0080032	-0.158043	class1
FBtr0080042	0.541756	class1
FBtr0080043	-0.374374	class1
FBtr0080061	0.291409	class1
FBtr0080074	0.0368271	class1
FBtr0080114	-0.531024	class1
FBtr0080117	-0.103772	class1
FBtr0080121	-0.0531069	class1
FBtr0080135	-0.773014	class1
FBtr0080162	-0.364186	class1
FBtr0080189	0.0122343	class1
FBtr0080196	-0.24222	class1
FBtr0080228	-0.522652	class1
FBtr0080231	-0.0201086	class1
FBtr0080235	-0.325635	class1
FBtr0080259	-0.0352986	class1
FBtr0080261	-0.0731193	class1
FBtr0080274	0.0402992	class1
FBtr0080291	-0.677242	class1
FBtr0080294	0.065214	class1
FBtr0080308	0.399163	class1
FBtr0080312	-0.0778193	class1
FBtr0080316	-1.92271	class1
FBtr0080344	-0.334867	class1
FBtr0080388	0.328593	class1
FBtr0080389	0.491941	class1
FBtr0080427	0.0179524	class1
FBtr0080428	-0.632434	class1
FBtr0080430	-0.275663	class1
FBtr0080435	-0.344156	class1
FBtr0080436	0.287434	class1
FBtr0080439	0.350412	class1
FBtr0080445	-0.0288893	class1
FBtr0080460	-0.00411187	class1
FBtr0080468	0.0332954	class1
FBtr0080470	-0.310328	class1
FBtr0080471	0.701268	class1
FBtr0080484	-0.239723	class1
FBtr0080488	-0.690235	class1
FBtr0080489	0.186629	class1
FBtr0080498	0.645479	class1
FBtr0080511	-0.00760579	class1
FBtr0080519	-0.349053	class1
FBtr0080527	-0.864402	class1
FBtr0080534	0.0727008	class1
FBtr0080537	-0.151492	class1
FBtr0080540	-0.429051	class1
FBtr0080541	-0.198573	class1
FBtr0080546	-0.20426	class1
FBtr0080566	-0.217753	class1
FBtr0080580	-0.0103396	class1
FBtr0080602	0.681558	class1
FBtr0080624	0.286742	class1
FBtr0080676	0.570568	class1
FBtr0080700	-0.0768416	class1
FBtr0080705	-0.700768	class1
FBtr0080709	-0.370782	class1
FBtr0080722	-0.163448	class1
FBtr0080723	-0.307872	class1
FBtr0080734	-0.88728	class1
FBtr0080801	0.065475	class1
FBtr0080808	-0.194237	class1
FBtr0080831	-0.375142	class1
FBtr0080838	-0.301111	class1
FBtr0080852	-0.0154455	class1
FBtr0080854	-0.396856	class1
FBtr0080866	-0.118107	class1
FBtr0080873	-0.227622	class1
FBtr0080880	0.316671	class1
FBtr0080908	0.185454	class1
FBtr0080911	0.532427	class1
FBtr0080947	-0.601491	class1
FBtr0080956	-0.429515	class1
FBtr0080971	0.527902	class1
FBtr0080983	-0.436276	class1
FBtr0080989	-0.200128	class1
FBtr0080994	-0.311814	class1
FBtr0081021	-0.467074	class1
FBtr0081035	0.401581	class1
FBtr0081061	-0.220747	class1
FBtr0081092	0.107341	class1
FBtr0081098	-0.60505	class1
FBtr0081102	-0.00464394	class1
FBtr0081111	0.0360899	class1
FBtr0081122	-0.140032	class1
FBtr0081128	-0.111422	class1
FBtr0081148	0.108468	class1
FBtr0081155	-0.0865802	class1
FBtr0081162	-0.154305	class1
FBtr0081174	-0.275855	class1
FBtr0081177	0.807132	class1
FBtr0081179	0.942981	class1
FBtr0081186	-0.317723	class1
FBtr0081193	-1.01439	class1
FBtr0081194	0.309808	class1
FBtr0081208	0.0947529	class1
FBtr0081247	0.164532	class1
FBtr0081248	-0.105588	class1
FBtr0081249	-0.229383	class1
FBtr0081257	-0.0415259	class1
FBtr0081266	0.456904	class1
FBtr0081287	0.183969	class1
FBtr0081318	-0.110109	class1
FBtr0081324	-0.146271	class1
FBtr0081327	-0.534218	class1
FBtr0081341	0.997825	class1
FBtr0081358	-0.0124617	class1
FBtr0081371	-0.430361	class1
FBtr0081397	-0.233488	class1
FBtr0081399	-0.104202	class1
FBtr0081403	0.0657156	class1
FBtr0081459	-0.331566	class1
FBtr0081460	-0.778812	class1
FBtr0081465	-0.497154	class1
FBtr0081485	4.31781	class1
FBtr0081512	0.29596	class1
FBtr0081538	-0.108184	class1
FBtr0081545	-0.184209	class1
FBtr0081647	1.0272	class1
FBtr0081719	-0.169569	class1
FBtr0081745	-1.40191	class1
FBtr0081765	0.267106	class1
FBtr0081780	0.609406	class1
FBtr0081789	-0.33045	class1
FBtr0081792	-0.317522	class1
FBtr0081806	-0.288285	class1
FBtr0081816	-0.511098	class1
FBtr0081820	-0.170131	class1
FBtr0081837	-2.13097	class1
FBtr0081841	-0.0673507	class1
FBtr0081843	-0.517011	class1
FBtr0081858	0.2653	class1
FBtr0081867	0.121234	class1
FBtr0081879	0.471623	class1
FBtr0081880	0.301049	class1
FBtr0081892	-0.00795651	class1
FBtr0081897	-0.0367012	class1
FBtr0081901	0.500784	class1
FBtr0081915	-0.0393849	class1
FBtr0081931	-0.5735	class1
FBtr0081943	0.341135	class1
FBtr0081944	0.184835	class1
FBtr0081958	-0.0804159	class1
FBtr0081959	-0.420412	class1
FBtr0081965	-0.273572	class1
FBtr0081968	-0.158028	class1
FBtr0081978	-0.162181	class1
FBtr0081981	-0.235507	class1
FBtr0082003	-0.269731	class1
FBtr0082005	0.00507283	class1
FBtr0082011	-0.429744	class1
FBtr0082052	0.543112	class1
FBtr0082055	-0.421142	class1
FBtr0082073	0.225516	class1
FBtr0082075	0.39487	class1
FBtr0082077	0.794799	class1
FBtr0082102	-0.103587	class1
FBtr0082113	0.0300268	class1
FBtr0082114	-0.481955	class1
FBtr0082125	-0.673476	class1
FBtr0082179	0.285155	class1
FBtr0082231	-0.690092	class1
FBtr0082237	0.387419	class1
FBtr0082240	0.32773	class1
FBtr0082246	-0.779456	class1
FBtr0082280	0.182426	class1
FBtr0082289	-0.378238	class1
FBtr0082312	-0.825612	class1
FBtr0082323	0.470589	class1
FBtr0082329	-0.248164	class1
FBtr0082340	-1.00336	class1
FBtr0082353	-0.0626402	class1
FBtr0082365	-0.0140172	class1
FBtr0082366	0.270758	class1
FBtr0082392	-0.0589784	class1
FBtr0082413	0.0386182	class1
FBtr0082418	0.218097	class1
FBtr0082443	0.237968	class1
FBtr0082470	-0.4787	class1
FBtr0082508	0.0597461	class1
FBtr0082513	0.341167	class1
FBtr0082517	0.234709	class1
FBtr0082531	-0.0980922	class1
FBtr0082542	-0.165828	class1
FBtr0082548	0.151466	class1
FBtr0082555	0.516384	class1
FBtr0082563	-0.15314	class1
FBtr0082570	3.12531	class1
FBtr0082615	0.0204338	class1
FBtr0082681	-0.254698	class1
FBtr0082688	-0.0943581	class1
FBtr0082693	-0.570423	class1
FBtr0082763	-0.277563	class1
FBtr0082778	-0.612055	class1
FBtr0082780	0.45499	class1
FBtr0082797	-0.794415	class1
FBtr0082808	-0.132587	class1
FBtr0082817	0.134552	class1
FBtr0082863	-0.206638	class1
FBtr0082926	-0.0806652	class1
FBtr0082975	-0.291993	class1
FBtr0082978	-0.0781055	class1
FBtr0082991	0.000677948	class1
FBtr0083005	-0.134493	class1
FBtr0083051	-0.0566771	class1
FBtr0083089	-0.310165	class1
FBtr0083094	0.433759	class1
FBtr0083099	-0.397636	class1
FBtr0083109	0.000669354	class1
FBtr0083117	0.0563574	class1
FBtr0083123	-0.267832	class1
FBtr0083126	-0.0980876	class1
FBtr0083179	0.0421291	class1
FBtr0083190	0.295056	class1
FBtr0083200	0.985909	class1
FBtr0083201	0.46448	class1
FBtr0083228	0.338868	class1
FBtr0083251	0.733556	class1
FBtr0083255	0.0615323	class1
FBtr0083257	-0.318718	class1
FBtr0083266	-0.462271	class1
FBtr0083291	0.445627	class1
FBtr0083308	0.15185	class1
FBtr0083316	0.156588	class1
FBtr0083324	0.000674477	class1
FBtr0083325	-0.0195727	class1
FBtr0083353	-0.350356	class1
FBtr0083375	0.768247	class1
FBtr0083376	0.198793	class1
FBtr0083379	-0.121429	class1
FBtr0083391	0.0350157	class1
FBtr0083393	-0.594577	class1
FBtr0083414	-0.155643	class1
FBtr0083462	-0.623392	class1
FBtr0083505	0.0235831	class1
FBtr0083509	-1.28956	class1
FBtr0083595	0.201816	class1
FBtr0083606	-0.354044	class1
FBtr0083623	-0.323866	class1
FBtr0083637	0.120725	class1
FBtr0083668	0.0546979	class1
FBtr0083671	0.565784	class1
FBtr0083697	-0.152873	class1
FBtr0083700	0.0124557	class1
FBtr0083718	-0.720993	class1
FBtr0083729	0.17224	class1
FBtr0083777	-0.844003	class1
FBtr0083852	0.233949	class1
FBtr0083857	0.130504	class1
FBtr0083882	-0.478469	class1
FBtr0083913	-0.450053	class1
FBtr0083949	-0.348937	class1
FBtr0083986	0.1479	class1
FBtr0083987	0.0808353	class1
FBtr0083992	-0.194097	class1
FBtr0084002	0.260903	class1
FBtr0084009	-0.18872	class1
FBtr0084010	-0.034226	class1
FBtr0084016	0.0913456	class1
FBtr0084017	0.0856505	class1
FBtr0084020	0.034741	class1
FBtr0084035	-0.0837539	class1
FBtr0084036	-0.0438413	class1
FBtr0084039	0.270205	class1
FBtr0084044	-0.0589846	class1
FBtr0084107	-0.299826	class1
FBtr0084151	-0.929255	class1
FBtr0084157	0.120791	class1
FBtr0084183	0.367151	class1
FBtr0084185	-0.207069	class1
FBtr0084201	-0.966505	class1
FBtr0084216	0.303008	class1
FBtr0084224	-0.242905	class1
FBtr0084260	-0.185391	class1
FBtr0084264	0.655103	class1
FBtr0084281	-0.0972605	class1
FBtr0084282	-0.211556	class1
FBtr0084289	-0.709415	class1
FBtr0084294	-0.218201	class1
FBtr0084302	0.114083	class1
FBtr0084311	-0.198344	class1
FBtr0084356	-0.418227	class1
FBtr0084368	-0.0994983	class1
FBtr0084374	-0.38017	class1
FBtr0084406	-0.374835	class1
FBtr0084407	0.0480033	class1
FBtr0084450	-0.336673	class1
FBtr0084460	-0.28663	class1
FBtr0084463	0.727112	class1
FBtr0084467	-0.168942	class1
FBtr0084491	0.202872	class1
FBtr0084496	0.314235	class1
FBtr0084501	0.264472	class1
FBtr0084506	-0.0663627	class1
FBtr0084520	-0.069952	class1
FBtr0084527	0.215827	class1
FBtr0084529	-1.578	class1
FBtr0084533	0.137895	class1
FBtr0084536	0.200787	class1
FBtr0084601	0.0613098	class1
FBtr0084633	-0.0920776	class1
FBtr0084639	0.0748873	class1
FBtr0084645	0.221014	class1
FBtr0084665	-0.0603418	class1
FBtr0084670	-0.271863	class1
FBtr0084681	0.324013	class1
FBtr0084689	0.0190187	class1
FBtr0084715	-0.617095	class1
FBtr0084736	0.759835	class1
FBtr0084743	-0.00882533	class1
FBtr0084755	-0.0458884	class1
FBtr0084783	0.138117	class1
FBtr0084786	-0.293945	class1
FBtr0084791	-0.868963	class1
FBtr0084794	0.262174	class1
FBtr0084796	-0.0926344	class1
FBtr0084837	-0.227688	class1
FBtr0084878	-0.282721	class1
FBtr0084893	-1.38696	class1
FBtr0084898	-0.486436	class1
FBtr0084908	0.357683	class1
FBtr0084949	-0.501503	class1
FBtr0084952	0.078002	class1
FBtr0084958	0.233265	class1
FBtr0084967	0.0502442	class1
FBtr0084985	0.358384	class1
FBtr0084990	-0.473208	class1
FBtr0085015	-0.169128	class1
FBtr0085039	-0.0155666	class1
FBtr0085046	-0.277542	class1
FBtr0085064	-0.344419	class1
FBtr0085070	0.334707	class1
FBtr0085093	0.139054	class1
FBtr0085105	-1.17618	class1
FBtr0085106	0.0382082	class1
FBtr0085108	-0.684463	class1
FBtr0085132	-0.628231	class1
FBtr0085159	0.0731	class1
FBtr0085179	-0.429364	class1
FBtr0085200	-0.270543	class1
FBtr0085217	-0.0109136	class1
FBtr0085224	0.666572	class1
FBtr0085249	-0.168954	class1
FBtr0085266	-0.18769	class1
FBtr0085304	-0.541399	class1
FBtr0085308	0.178405	class1
FBtr0085310	-0.0331879	class1
FBtr0085351	-0.365479	class1
FBtr0085352	0.130723	class1
FBtr0085359	-0.00980399	class1
FBtr0085360	-0.0054951	class1
FBtr0085371	-0.477254	class1
FBtr0085397	0.20942	class1
FBtr0085416	-0.078417	class1
FBtr0085417	-0.174761	class1
FBtr0085419	0.181879	class1
FBtr0085432	-0.356627	class1
FBtr0085477	0.0284562	class1
FBtr0085484	-0.0396828	class1
FBtr0085488	-0.191053	class1
FBtr0085503	0.309492	class1
FBtr0085513	-0.993032	class1
FBtr0085621	0.759292	class1
FBtr0085650	-0.348581	class1
FBtr0085673	-0.604992	class1
FBtr0085708	0.233274	class1
FBtr0085733	-0.246864	class1
FBtr0085742	-0.282363	class1
FBtr0085753	0.126161	class1
FBtr0085758	0.32143	class1
FBtr0085788	0.0141843	class1
FBtr0085798	-0.11829	class1
FBtr0085806	-0.128932	class1
FBtr0085808	-0.498602	class1
FBtr0085815	0.145441	class1
FBtr0085836	-0.426658	class1
FBtr0085842	0.197562	class1
FBtr0085845	0.249559	class1
FBtr0085858	-0.124098	class1
FBtr0085877	0.0662964	class1
FBtr0085915	1.18966	class1
FBtr0085955	0.36992	class1
FBtr0085974	0.200857	class1
FBtr0085992	0.305443	class1
FBtr0086000	-0.205348	class1
FBtr0086003	0.141873	class1
FBtr0086033	-1.67412	class1
FBtr0086036	-0.00133804	class1
FBtr0086072	-0.279613	class1
FBtr0086082	0.521133	class1
FBtr0086084	0.19652	class1
FBtr0086091	0.309582	class1
FBtr0086094	0.359444	class1
FBtr0086182	-0.149381	class1
FBtr0086185	-0.161329	class1
FBtr0086186	0.372098	class1
FBtr0086231	-0.483367	class1
FBtr0086236	0.00952922	class1
FBtr0086252	-0.313958	class1
FBtr0086259	0.270926	class1
FBtr0086270	0.0382378	class1
FBtr0086292	-0.331447	class1
FBtr0086298	-0.299268	class1
FBtr0086315	-0.511108	class1
FBtr0086461	0.470157	class1
FBtr0086499	-0.314585	class1
FBtr0086500	0.385369	class1
FBtr0086504	-0.282322	class1
FBtr0086516	0.17412	class1
FBtr0086551	0.186008	class1
FBtr0086563	-0.487575	class1
FBtr0086579	-0.333205	class1
FBtr0086580	0.0980113	class1
FBtr0086609	-0.0127352	class1
FBtr0086617	0.0953004	class1
FBtr0086632	-0.496921	class1
FBtr0086636	0.103522	class1
FBtr0086652	-0.628954	class1
FBtr0086657	0.0849473	class1
FBtr0086694	-0.0232358	class1
FBtr0086734	-0.108035	class1
FBtr0086746	-0.0161955	class1
FBtr0086754	0.590649	class1
FBtr0086810	-0.460116	class1
FBtr0086833	0.0624896	class1
FBtr0086840	0.132168	class1
FBtr0086895	0.34361	class1
FBtr0086921	-0.500103	class1
FBtr0086938	-0.397385	class1
FBtr0086946	-0.132729	class1
FBtr0086961	-0.14269	class1
FBtr0086962	-0.32506	class1
FBtr0086982	-0.215842	class1
FBtr0087048	-0.394393	class1
FBtr0087074	0.183114	class1
FBtr0087079	0.133809	class1
FBtr0087109	0.272471	class1
FBtr0087115	-0.366396	class1
FBtr0087121	-0.878805	class1
FBtr0087130	0.28979	class1
FBtr0087144	0.506878	class1
FBtr0087184	-0.116495	class1
FBtr0087209	-0.152056	class1
FBtr0087236	0.150419	class1
FBtr0087242	-0.244295	class1
FBtr0087298	-0.362539	class1
FBtr0087343	0.164595	class1
FBtr0087353	0.40001	class1
FBtr0087373	0.45468	class1
FBtr0087387	-0.231126	class1
FBtr0087391	0.198595	class1
FBtr0087392	-0.00101143	class1
FBtr0087404	-0.0314965	class1
FBtr0087405	-0.337217	class1
FBtr0087407	-0.371872	class1
FBtr0087409	-0.296888	class1
FBtr0087414	0.119837	class1
FBtr0087421	-0.376963	class1
FBtr0087450	0.181121	class1
FBtr0087477	-0.289883	class1
FBtr0087487	-0.486519	class1
FBtr0087501	1.9629	class1
FBtr0087523	-0.210071	class1
FBtr0087532	-0.548572	class1
FBtr0087538	0.336284	class1
FBtr0087539	1.09372	class1
FBtr0087564	0.148068	class1
FBtr0087569	-0.0555138	class1
FBtr0087574	0.0626711	class1
FBtr0087577	0.109623	class1
FBtr0087578	-0.115637	class1
FBtr0087612	-0.151526	class1
FBtr0087621	0.465083	class1
FBtr0087633	-0.25308	class1
FBtr0087645	-0.338017	class1
FBtr0087647	-0.566203	class1
FBtr0087666	0.178727	class1
FBtr0087683	-0.31134	class1
FBtr0087686	-0.187537	class1
FBtr0087699	-0.360879	class1
FBtr0087702	-0.0966379	class1
FBtr0087740	0.248719	class1
FBtr0087760	0.214426	class1
FBtr0087772	0.557798	class1
FBtr0087788	-0.434538	class1
FBtr0087844	0.136523	class1
FBtr0087855	0.0293311	class1
FBtr0087881	0.155299	class1
FBtr0087895	0.344149	class1
FBtr0087926	0.227955	class1
FBtr0087950	0.0590376	class1
FBtr0087974	-0.287465	class1
FBtr0087976	-0.169142	class1
FBtr0087989	-0.265111	class1
FBtr0088014	1.75276	class1
FBtr0088021	-1.29393	class1
FBtr0088032	0.326704	class1
FBtr0088045	-0.389945	class1
FBtr0088048	0.671135	class1
FBtr0088051	-0.173002	class1
FBtr0088068	0.359029	class1
FBtr0088089	-0.504111	class1
FBtr0088102	-1.3009	class1
FBtr0088114	0.341478	class1
FBtr0088196	-0.211373	class1
FBtr0088212	0.12448	class1
FBtr0088245	-0.406954	class1
FBtr0088246	-0.025126	class1
FBtr0088249	-0.2539	class1
FBtr0088251	-0.778535	class1
FBtr0088253	-0.293085	class1
FBtr0088257	-0.0880801	class1
FBtr0088258	0.32468	class1
FBtr0088333	-0.189653	class1
FBtr0088349	-0.276503	class1
FBtr0088360	-0.415712	class1
FBtr0088369	-0.30959	class1
FBtr0088375	0.298676	class1
FBtr0088385	-0.66561	class1
FBtr0088405	0.276988	class1
FBtr0088409	-0.302453	class1
FBtr0088423	0.019871	class1
FBtr0088434	-0.200777	class1
FBtr0088440	-0.374107	class1
FBtr0088474	0.715008	class1
FBtr0088502	0.602293	class1
FBtr0088506	0.343998	class1
FBtr0088524	0.255347	class1
FBtr0088560	-1.07124	class1
FBtr0088583	0.0655985	class1
FBtr0088633	0.580698	class1
FBtr0088658	-0.707206	class1
FBtr0088671	-0.368737	class1
FBtr0088678	0.180876	class1
FBtr0088694	0.193693	class1
FBtr0088710	0.127072	class1
FBtr0088730	-0.386581	class1
FBtr0088781	0.0288362	class1
FBtr0088784	0.612611	class1
FBtr0088806	-0.020732	class1
FBtr0088807	0.0169171	class1
FBtr0088815	-0.514912	class1
FBtr0088821	0.235654	class1
FBtr0088844	0.0364238	class1
FBtr0088868	-0.657033	class1
FBtr0088874	-0.334027	class1
FBtr0088910	0.156366	class1
FBtr0088922	4.37025	class1
FBtr0088930	0.188485	class1
FBtr0088942	-0.100895	class1
FBtr0088954	-0.441415	class1
FBtr0088966	-0.0529123	class1
FBtr0088970	-0.0555702	class1
FBtr0089015	0.3405	class1
FBtr0089023	-0.0147459	class1
FBtr0089024	-0.170629	class1
FBtr0089026	0.189646	class1
FBtr0089028	0.225578	class1
FBtr0089030	-0.00384057	class1
FBtr0089096	0.426503	class1
FBtr0089104	0.0650465	class1
FBtr0089106	-0.0831308	class1
FBtr0089112	-0.273553	class1
FBtr0089125	-0.644051	class1
FBtr0089146	0.148758	class1
FBtr0089154	0.394248	class1
FBtr0089179	-0.689491	class1
FBtr0089185	-0.0386656	class1
FBtr0089188	0.221036	class1
FBtr0089209	-0.449331	class1
FBtr0089222	-0.505368	class1
FBtr0089229	0.0647091	class1
FBtr0089376	-0.961177	class1
FBtr0089377	-0.9297	class1
FBtr0089394	0.285636	class1
FBtr0089414	-0.354991	class1
FBtr0089480	0.363316	class1
FBtr0089491	0.0412032	class1
FBtr0089500	-0.0215382	class1
FBtr0089581	-0.107886	class1
FBtr0089595	-0.283023	class1
FBtr0089617	-0.170704	class1
FBtr0089623	-0.457622	class1
FBtr0089624	-0.414323	class1
FBtr0089649	-0.0211072	class1
FBtr0089717	0.45658	class1
FBtr0089734	-0.139172	class1
FBtr0089771	-0.423965	class1
FBtr0089786	-0.0339268	class1
FBtr0089798	0.444574	class1
FBtr0089850	-0.29189	class1
FBtr0089868	-0.329912	class1
FBtr0089873	-0.044186	class1
FBtr0089913	-0.506535	class1
FBtr0089920	0.0648113	class1
FBtr0089956	-0.27469	class1
FBtr0089995	-0.299214	class1
FBtr0091474	-0.777565	class1
FBtr0091489	-0.090886	class1
FBtr0091492	-0.0830289	class1
FBtr0091512	0.337214	class1
FBtr0091650	-0.904909	class1
FBtr0091716	1.11433	class1
FBtr0091935	-0.76831	class1
FBtr0100009	-0.156464	class1
FBtr0100132	0.0735446	class1
FBtr0100218	0.162856	class1
FBtr0100360	0.0040522	class1
FBtr0100361	0.262816	class1
FBtr0100461	-0.255354	class1
FBtr0100513	-0.444561	class1
FBtr0100543	0.223436	class1
FBtr0100556	-0.674908	class1
FBtr0100598	0.00466623	class1
FBtr0100619	-0.0263542	class1
FBtr0100833	-1.147	class1
FBtr0110791	0.175129	class1
FBtr0110806	-0.0931544	class1
FBtr0110850	0.326843	class1
FBtr0110983	0.0843343	class1
FBtr0111000	-1.3171	class1
FBtr0111047	-0.465325	class1
FBtr0111285	0.178544	class1
FBtr0111291	0.332139	class1
FBtr0112422	-0.193652	class1
FBtr0112523	0.319705	class1
FBtr0112557	0.476092	class1
FBtr0112614	1.36665	class1
FBtr0112619	-0.185321	class1
FBtr0112653	-0.423127	class1
FBtr0112744	0.230055	class1
FBtr0112775	-0.25688	class1
FBtr0112777	-0.268602	class1
FBtr0112789	-0.254508	class1
FBtr0112830	0.102302	class1
FBtr0112892	0.0971591	class1
FBtr0112904	0.120394	class1
FBtr0112926	0.0703896	class1
FBtr0112980	0.225438	class1
FBtr0112992	0.332122	class1
FBtr0113028	-0.350768	class1
FBtr0113033	0.0311053	class1
FBtr0113084	-0.32327	class1
FBtr0113104	0.196412	class1
FBtr0113153	-0.0871185	class1
FBtr0113167	-0.44199	class1
FBtr0113171	0.349922	class1
FBtr0113179	0.0317582	class1
FBtr0113183	0.075019	class1
FBtr0113197	-0.23679	class1
FBtr0113203	-0.335907	class1
FBtr0113207	0.00590135	class1
FBtr0113210	0.478314	class1
FBtr0113217	0.480932	class1
FBtr0113224	-0.259918	class1
FBtr0113228	-0.110449	class1
FBtr0113248	0.0462354	class1
FBtr0113285	-0.296452	class1
FBtr0113297	-0.0790824	class1
FBtr0113304	-0.00743821	class1
FBtr0113316	-0.301597	class1
FBtr0113377	-0.487345	class1
FBtr0113425	-0.558739	class1
FBtr0113451	-0.272428	class1
FBtr0113469	-0.107104	class1
FBtr0113746	0.341841	class1
FBtr0113829	0.239103	class1
FBtr0114452	0.00301955	class1
FBtr0114453	0.161665	class1
FBtr0114558	0.288798	class1
FBtr0114564	0.198292	class1
FBtr0114575	0.474445	class1
FBtr0114589	-0.0110144	class1
FBtr0114613	-0.447538	class1
FBtr0114615	0.208525	class1
FBtr0114622	0.0999352	class1
FBtr0273183	0.631686	class1
FBtr0273208	0.795389	class1
FBtr0273230	-0.237027	class1
FBtr0273273	-0.138464	class1
FBtr0273277	0.458218	class1
FBtr0273305	0.283282	class1
FBtr0273308	0.577549	class1
FBtr0273323	0.140765	class1
FBtr0273339	0.00635394	class1
FBtr0273382	-0.37375	class1
FBtr0273390	0.180842	class1
FBtr0273391	0.192136	class1
FBtr0289977	0.395814	class1
FBtr0289981	-0.254535	class1
FBtr0290018	0.213973	class1
FBtr0290031	-0.0769504	class1
FBtr0290059	-0.386108	class1
FBtr0290069	-0.382537	class1
FBtr0290115	-0.376379	class1
FBtr0290134	3.28257	class1
FBtr0290223	-0.882339	class1
FBtr0290234	-0.0586663	class1
FBtr0290239	-0.573456	class1
FBtr0290258	0.144301	class1
FBtr0290341	0.224373	class1
FBtr0299507	0.449113	class1
FBtr0299508	0.747535	class1
FBtr0299516	0.0996185	class1
FBtr0299600	-0.247298	class1
FBtr0299658	0.112789	class1
FBtr0299694	-0.500376	class1
FBtr0299796	0.0901209	class1
FBtr0299806	1.39717	class1
FBtr0299851	0.0459307	class1
FBtr0299903	-0.110854	class1
FBtr0299905	-0.177191	class1
FBtr0299912	0.103414	class1
FBtr0299918	0.485698	class1
FBtr0299938	0.710328	class1
FBtr0299952	-0.66398	class1
FBtr0299967	0.38447	class1
FBtr0299975	0.0801515	class1
FBtr0299977	-0.500104	class1
FBtr0300076	-0.792889	class1
FBtr0300080	0.606971	class1
FBtr0300174	-1.00129	class1
FBtr0300177	0.597024	class1
FBtr0300179	0.205307	class1
FBtr0300199	-0.390953	class1
FBtr0300237	0.349896	class1
FBtr0300240	0.0797573	class1
FBtr0300248	0.131845	class1
FBtr0300256	-0.690334	class1
FBtr0300273	-0.47111	class1
FBtr0300329	-0.0688876	class1
FBtr0300379	-0.170826	class1
FBtr0300391	0.0415213	class1
FBtr0300398	0.0458983	class1
FBtr0300437	-0.771108	class1
FBtr0300441	0.915013	class1
FBtr0300501	-0.229407	class1
FBtr0300519	0.0136047	class1
FBtr0300553	-0.60072	class1
FBtr0300611	-0.0732012	class1
FBtr0300625	-0.332641	class1
FBtr0300635	0.305218	class1
FBtr0300643	-0.164983	class1
FBtr0300671	0.418407	class1
FBtr0300713	0.822375	class1
FBtr0300735	-0.529076	class1
FBtr0300756	-1.00144	class1
FBtr0300763	-0.118303	class1
FBtr0300789	1.54055	class1
FBtr0300888	-0.262414	class1
FBtr0300923	0.152185	class1
FBtr0300994	-0.42662	class1
FBtr0300997	-0.167664	class1
FBtr0300998	-1.01153	class1
FBtr0301007	-0.0010766	class1
FBtr0301008	0.21691	class1
FBtr0301013	0.00378629	class1
FBtr0301040	-0.334722	class1
FBtr0301073	-0.0910069	class1
FBtr0301076	-0.622448	class1
FBtr0301081	-0.5678	class1
FBtr0301083	-0.0678763	class1
FBtr0301085	-0.736389	class1
FBtr0301134	0.466523	class1
FBtr0301142	-0.670767	class1
FBtr0301153	0.226653	class1
FBtr0301161	0.0889921	class1
FBtr0301205	0.0117567	class1
FBtr0301229	-0.0165422	class1
FBtr0301232	0.537894	class1
FBtr0301234	-0.411676	class1
FBtr0301271	-0.478452	class1
FBtr0301273	-1.17511	class1
FBtr0301284	-0.279833	class1
FBtr0301316	-0.10708	class1
FBtr0301368	-0.276122	class1
FBtr0301423	-0.381025	class1
FBtr0301438	-0.413938	class1
FBtr0301452	0.702999	class1
FBtr0301496	-0.373237	class1
FBtr0301500	-0.0844811	class1
FBtr0301507	0.248753	class1
FBtr0301514	-0.141764	class1
FBtr0301618	0.521407	class1
FBtr0301645	0.767595	class1
FBtr0301654	0.808894	class1
FBtr0301670	0.245776	class1
FBtr0301693	0.173388	class1
FBtr0301715	-0.241427	class1
FBtr0301779	-0.530148	class1
FBtr0301837	-0.160142	class1
FBtr0301852	-0.187781	class1
FBtr0302020	0.123929	class1
FBtr0302027	-0.460835	class1
FBtr0302082	-0.380751	class1
FBtr0302091	0.0350019	class1
FBtr0302107	0.0874288	class1
FBtr0302209	0.251779	class1
FBtr0302294	-0.256117	class1
FBtr0302302	0.194052	class1
FBtr0302338	-0.848242	class1
FBtr0302355	0.231198	class1
FBtr0302438	0.0178271	class1
FBtr0302616	-0.803589	class1
FBtr0302650	-0.068411	class1
FBtr0302731	0.554753	class1
FBtr0302921	0.514566	class1
FBtr0302933	0.759844	class1
FBtr0303025	-0.388405	class1
FBtr0303219	1.34988	class1
FBtr0303251	-0.572494	class1
FBtr0303259	-0.332284	class1
FBtr0303264	-0.520965	class1
FBtr0303280	0.173669	class1
FBtr0303381	-0.0965103	class1
FBtr0303404	0.820769	class1
FBtr0303406	2.03024	class1
FBtr0303408	-0.182491	class1
FBtr0303409	0.541882	class1
FBtr0303486	-0.174438	class1
FBtr0303708	0.378796	class1
FBtr0303789	-0.163346	class1
FBtr0303842	0.00274785	class1
FBtr0303874	-0.0975588	class1
FBtr0304108	-0.0537285	class1
FBtr0304114	-0.231696	class1
FBtr0304118	-0.0839288	class1
FBtr0304604	0.210516	class1
FBtr0304692	-0.471829	class1
FBtr0304694	-0.0819689	class1
FBtr0304729	-0.0445941	class1
FBtr0304796	1.30114	class1
FBtr0304813	0.125355	class1
FBtr0304826	0.0302465	class1
FBtr0304901	0.0101506	class1
FBtr0304903	0.427603	class1
FBtr0304920	0.826846	class1
FBtr0304984	-0.00998337	class1
FBtr0305043	1.17031	class1
FBtr0305132	-0.416542	class1
FBtr0305150	-0.375158	class1
FBtr0305214	0.309652	class1
FBtr0305317	0.0969583	class1
FBtr0305343	-0.244736	class1
FBtr0305358	3.12721	class1
FBtr0305559	0.227839	class1
FBtr0305667	0.263079	class1
FBtr0305913	0.517931	class1
FBtr0305916	-0.812554	class1
FBtr0305979	1.29853	class1
FBtr0306000	0.0507812	class1
FBtr0306017	0.253236	class1
FBtr0306023	-0.380928	class1
FBtr0306024	-0.486664	class1
FBtr0306026	-0.107535	class1
FBtr0306091	0.645183	class1
FBtr0306559	-0.0538975	class1
FBtr0306622	0.00431114	class1
FBtr0306633	0.0161019	class1
FBtr0306637	-8.20269	class1
FBtr0306679	-0.118946	class1
FBtr0306686	-0.494217	class1
FBtr0306735	0.549602	class1
FBtr0306944	-0.57886	class1
FBtr0306948	-0.658939	class1
FBtr0307018	-0.483544	class1
FBtr0307022	0.154057	class1
FBtr0307051	0.0249185	class1
FBtr0307077	0.0402869	class1
FBtr0307289	0.26673	class1
FBtr0307333	0.651183	class1
FBtr0307368	-0.128625	class1
FBtr0307539	-0.485256	class1
FBtr0308076	-0.15213	class1
FBtr0308127	-1.44429	class1
FBtr0308198	0.280595	class1
FBtr0308309	0.37505	class1
FBtr0308583	-0.347128	class1
FBtr0308589	0.0563092	class1
FBtr0308642	0.0196087	class1
FBtr0308682	-0.471225	class1
FBtr0308790	1.52037	class1
FBtr0308806	-0.0487324	class1
FBtr0309064	-0.0158385	class1
FBtr0309101	-0.362517	class1
FBtr0309179	0.363989	class1
FBtr0309251	-0.383008	class1
FBtr0309285	0.0623765	class1
FBtr0309846	0.440136	class1
FBtr0309957	0.201696	class1
FBtr0310045	0.0755996	class1
FBtr0310162	-0.447199	class1
FBtr0310310	0.226348	class1
FBtr0310334	-0.00406008	class1
FBtr0310425	-0.174281	class1
FBtr0310439	-0.150713	class1
FBtr0310440	0.183841	class1
FBtr0310495	0.897864	class1
FBtr0310525	-0.010267	class1
FBtr0310555	-0.402426	class1
FBtr0321285	0.16823	class1
FBtr0329849	-0.183552	class1
FBtr0329880	0.78664	class1
FBtr0329894	0.906182	class1
FBtr0329935	-0.365434	class1
FBtr0329943	-0.107641	class1
FBtr0329949	-0.0259414	class1
FBtr0329957	0.201021	class1
FBtr0329963	0.318647	class1
FBtr0329978	0.0818182	class1
FBtr0329983	0.424548	class1
FBtr0329984	0.0786633	class1
FBtr0329986	0.525852	class1
FBtr0329988	-0.24341	class1
FBtr0329989	0.0773135	class1
FBtr0329992	-0.0812051	class1
FBtr0329994	0.13167	class1
FBtr0329997	-0.423671	class1
FBtr0330004	-0.150241	class1
FBtr0330024	1.02146	class1
FBtr0330037	0.119171	class1
FBtr0330041	1.22657	class1
FBtr0330042	-0.118161	class1
FBtr0330047	0.1748	class1
FBtr0330072	-0.484224	class1
FBtr0330082	-0.0254195	class1
FBtr0330089	0.495536	class1
FBtr0330090	0.0744916	class1
FBtr0330133	0.0896443	class1
FBtr0330140	0.470999	class1
FBtr0330144	0.0229376	class1
FBtr0330156	0.47402	class1
FBtr0330159	-0.193156	class1
FBtr0330161	-0.117289	class1
FBtr0330162	0.123215	class1
FBtr0330163	0.0220404	class1
FBtr0330167	0.0885456	class1
FBtr0330168	-0.706941	class1
FBtr0330169	-0.121281	class1
FBtr0330177	-0.0819783	class1
FBtr0330186	0.204743	class1
FBtr0330192	-0.0552906	class1
FBtr0330203	0.621209	class1
FBtr0330209	-0.0375879	class1
FBtr0330210	0.146777	class1
FBtr0330220	-0.497046	class1
FBtr0330227	-0.151034	class1
FBtr0330228	-0.273759	class1
FBtr0330230	-0.395575	class1
FBtr0330234	-0.275415	class1
FBtr0330240	0.330231	class1
FBtr0330245	0.168179	class1
FBtr0330247	0.945823	class1
FBtr0330249	0.087186	class1
FBtr0330255	0.549547	class1
FBtr0330258	-0.23549	class1
FBtr0330274	3.58234	class1
FBtr0330288	-0.405076	class1
FBtr0330298	-0.570363	class1
FBtr0330310	-1.53286	class1
FBtr0330313	-0.327716	class1
FBtr0330315	-0.0202407	class1
FBtr0330332	0.0222426	class1
FBtr0330368	0.367314	class1
FBtr0330371	-0.141641	class1
FBtr0330375	0.164169	class1
FBtr0330381	0.234876	class1
FBtr0330382	-0.186221	class1
FBtr0330383	0.460287	class1
FBtr0330391	1.09982	class1
FBtr0330392	-0.000560418	class1
FBtr0330401	-0.130027	class1
FBtr0330405	-0.3365	class1
FBtr0330418	0.15045	class1
FBtr0330612	0.415802	class1
FBtr0330618	-1.28158	class1
FBtr0330620	-0.0766255	class1
FBtr0330628	0.468809	class1
FBtr0330629	-0.156981	class1
FBtr0330734	0.666083	class1
FBtr0331160	0.414639	class1
FBtr0331161	-0.0402203	class1
FBtr0331182	-0.327964	class1
FBtr0331184	-0.114156	class1
FBtr0331303	0.465205	class1
FBtr0331346	-0.717103	class1
FBtr0331423	-0.0274306	class1
FBtr0331507	0.362022	class1
FBtr0331509	0.819579	class1
FBtr0331545	0.514019	class1
FBtr0331587	-0.25061	class1
FBtr0331677	0.935771	class1
FBtr0331692	1.40867	class1
FBtr0331737	-0.743373	class1
FBtr0331791	-0.0379772	class1
FBtr0331806	-0.401191	class1
FBtr0331858	-1.34947	class1
FBtr0331863	0.148823	class1
FBtr0331996	0.127854	class1
FBtr0332061	-0.598095	class1
FBtr0332119	-0.602005	class1
FBtr0332148	0.280965	class1
FBtr0332210	0.346781	class1
FBtr0332422	0.226643	class1
FBtr0332510	0.0213741	class1
FBtr0332558	0.0931018	class1
FBtr0332581	0.403414	class1
FBtr0332722	0.140845	class1
FBtr0332755	-0.321873	class1
FBtr0332818	0.196031	class1
FBtr0332836	-0.377762	class1
FBtr0332878	0.310503	class1
FBtr0332911	0.542196	class1
FBtr0332929	0.0546959	class1
FBtr0332964	0.213528	class1
FBtr0333026	0.43665	class1
FBtr0333049	0.175275	class1
FBtr0333101	0.487499	class1
FBtr0333121	-0.0644674	class1
FBtr0333208	-0.341551	class1
FBtr0333231	-0.23111	class1
FBtr0333307	0.0468762	class1
FBtr0333331	-0.192437	class1
FBtr0333355	0.297164	class1
FBtr0333466	0.430848	class1
FBtr0333579	-0.083004	class1
FBtr0333672	0.109711	class1
FBtr0333685	0.154218	class1
FBtr0333700	0.562846	class1
FBtr0333836	-0.236798	class1
FBtr0334005	1.12651	class1
FBtr0334408	0.680923	class1
FBtr0334515	-0.0858869	class1
FBtr0334552	-0.0593939	class1
FBtr0334574	0.255499	class1
FBtr0334584	-0.0981964	class1
FBtr0334636	-0.143925	class1
FBtr0334670	-0.39572	class1
FBtr0334677	0.469746	class1
FBtr0334820	0.254471	class1
FBtr0334898	0.192215	class1
FBtr0334984	0.0201003	class1
FBtr0335013	-0.51226	class1
FBtr0335015	0.164433	class1
FBtr0336477	-0.3175	class1
FBtr0336615	-0.0790627	class1
FBtr0336634	-0.00465003	class1
FBtr0336684	0.0690365	class1
FBtr0336725	-0.530871	class1
FBtr0336747	-0.210763	class1
FBtr0336806	-0.047988	class1
FBtr0336812	0.157664	class1
FBtr0336853	-0.278363	class1
FBtr0336969	-1.08295	class1
FBtr0339097	0.536108	class1
FBtr0339129	-0.223546	class1
FBtr0339144	0.249843	class1
FBtr0339154	0.065784	class1
FBtr0339160	-0.0868127	class1
FBtr0339420	-0.222709	class1
FBtr0339443	0.111269	class1
FBtr0339507	-0.332712	class1
FBtr0339679	0.163542	class1
FBtr0339697	0.272349	class1
FBtr0339703	0.0244589	class1
FBtr0339836	-0.248902	class1
FBtr0339907	-1.22455	class1
FBtr0339961	-0.346158	class1
FBtr0340054	-0.195344	class1
FBtr0340086	0.405243	class1
FBtr0340190	0.054148	class1
FBtr0340271	-0.216267	class1
FBtr0340335	-0.159034	class1
FBtr0340386	-0.255497	class1
FBtr0340626	-0.560506	class1
FBtr0340635	-0.460794	class1
FBtr0340652	0.558352	class1
FBtr0342900	0.251374	class1
FBtr0342991	-0.169739	class1
FBtr0343018	0.777053	class1
FBtr0343159	1.8612	class1
FBtr0343288	0.134048	class1
FBtr0343336	-0.163111	class1
FBtr0343552	0.353379	class1
FBtr0343752	3.44549	class1
FBtr0343753	-0.423205	class1
FBtr0343754	-2.45695	class1
FBtr0343755	-1.05544	class1
FBtr0343756	0.643891	class1
FBtr0343757	0.682585	class1
FBtr0343791	1.27322	class1
FBtr0343932	0.0496708	class1
FBtr0343994	2.48562	class1
FBtr0344239	-0.316924	class1
FBtr0344296	0.30713	class1
FBtr0344358	0.0437968	class1
FBtr0344431	0.330391	class1
FBtr0344528	0.282779	class1
FBtr0344625	-0.196428	class1
FBtr0344632	-0.604783	class1
FBtr0344636	0.512642	class1
FBtr0344652	-0.772577	class1
FBtr0344662	0.289447	class1
FBtr0344822	0.221083	class1
FBtr0344912	0.0938987	class1
FBtr0345112	-0.280823	class1
FBtr0346129	-3.62464	class1
FBtr0346282	2.26205	class1
FBtr0346409	-4.25187	class1
FBtr0346609	-0.288525	class1
FBtr0346668	0.0889583	class1
FBtr0346818	0.111933	class1
FBtr0346864	0.186756	class1
FBtr0347110	0.25022	class1
FBtr0347111	0.683757	class1
FBtr0347158	0.0282957	class1
FBtr0347287	-0.778249	class1
FBtr0347395	0.662791	class1
FBtr0347411	0.685188	class1
FBtr0347565	-0.0030676	class1
FBtr0347603	0.813821	class1
FBtr0070028	-0.670228	class2
FBtr0070103	0.167261	class2
FBtr0070140	1.03649	class2
FBtr0070146	0.0635838	class2
FBtr0070151	0.234635	class2
FBtr0070176	-0.178299	class2
FBtr0070260	0.0672642	class2
FBtr0070270	0.866207	class2
FBtr0070279	0.0780584	class2
FBtr0070284	3.27201	class2
FBtr0070313	0.294678	class2
FBtr0070316	-0.0403196	class2
FBtr0070330	0.899836	class2
FBtr0070340	0.150632	class2
FBtr0070381	-0.171303	class2
FBtr0070406	-0.795924	class2
FBtr0070412	-0.0668946	class2
FBtr0070429	0.450886	class2
FBtr0070432	-0.221316	class2
FBtr0070442	-0.620414	class2
FBtr0070447	-0.643534	class2
FBtr0070509	0.266756	class2
FBtr0070559	-0.559215	class2
FBtr0070575	0.242991	class2
FBtr0070625	-0.641858	class2
FBtr0070626	0.0107029	class2
FBtr0070627	0.50212	class2
FBtr0070643	0.607479	class2
FBtr0070650	-0.00135663	class2
FBtr0070772	-0.502759	class2
FBtr0070827	-0.0349943	class2
FBtr0070841	-0.0905546	class2
FBtr0070843	0.0172164	class2
FBtr0070872	-2.57688	class2
FBtr0070914	-0.232442	class2
FBtr0070918	0.585005	class2
FBtr0070948	-0.459684	class2
FBtr0070988	-0.0597189	class2
FBtr0071013	-0.554903	class2
FBtr0071015	-1.58715	class2
FBtr0071042	0.00350162	class2
FBtr0071049	0.152692	class2
FBtr0071066	0.938957	class2
FBtr0071092	0.264843	class2
FBtr0071093	0.00776968	class2
FBtr0071109	0.281553	class2
FBtr0071117	0.252365	class2
FBtr0071125	-0.246828	class2
FBtr0071174	-0.427156	class2
FBtr0071175	-0.288121	class2
FBtr0071212	0.0322707	class2
FBtr0071223	0.179286	class2
FBtr0071233	0.0976095	class2
FBtr0071246	0.374398	class2
FBtr0071397	-1.31515	class2
FBtr0071450	-0.123312	class2
FBtr0071493	-0.416482	class2
FBtr0071546	-0.209217	class2
FBtr0071548	-0.0692496	class2
FBtr0071563	-0.109269	class2
FBtr0071606	0.0123184	class2
FBtr0071609	0.363666	class2
FBtr0071610	-0.806261	class2
FBtr0071615	-0.410392	class2
FBtr0071636	0.0582705	class2
FBtr0071654	-0.196197	class2
FBtr0071758	0.207444	class2
FBtr0071763	0.24336	class2
FBtr0071774	-0.214044	class2
FBtr0071775	-0.975311	class2
FBtr0071838	-0.425257	class2
FBtr0071849	-0.494244	class2
FBtr0071899	-0.0870048	class2
FBtr0071936	-0.0294741	class2
FBtr0071994	-0.31213	class2
FBtr0072027	0.956796	class2
FBtr0072058	0.102245	class2
FBtr0072073	-0.0491698	class2
FBtr0072087	0.013708	class2
FBtr0072112	-0.487294	class2
FBtr0072145	-0.0948054	class2
FBtr0072157	-0.112282	class2
FBtr0072177	-0.107443	class2
FBtr0072195	0.0319214	class2
FBtr0072204	0.378491	class2
FBtr0072205	0.389798	class2
FBtr0072247	-0.176508	class2
FBtr0072251	-0.318227	class2
FBtr0072257	-0.443525	class2
FBtr0072263	-0.344864	class2
FBtr0072285	0.193541	class2
FBtr0072368	-0.445159	class2
FBtr0072396	-0.482709	class2
FBtr0072397	0.318537	class2
FBtr0072515	-0.337464	class2
FBtr0072532	0.449547	class2
FBtr0072548	-0.00695735	class2
FBtr0072551	0.272356	class2
FBtr0072556	-0.158959	class2
FBtr0072573	-0.124005	class2
FBtr0072589	0.331562	class2
FBtr0072593	-0.258165	class2
FBtr0072594	-0.116629	class2
FBtr0072597	-0.532164	class2
FBtr0072607	0.238908	class2
FBtr0072611	-0.848836	class2
FBtr0072644	-0.233266	class2
FBtr0072694	0.76862	class2
FBtr0072729	-0.414224	class2
FBtr0072747	0.174838	class2
FBtr0072788	0.249386	class2
FBtr0072826	-0.517189	class2
FBtr0072828	-0.366695	class2
FBtr0072955	0.0432978	class2
FBtr0072970	-0.263452	class2
FBtr0072972	-0.18082	class2
FBtr0072980	-0.166984	class2
FBtr0072984	0.509179	class2
FBtr0072991	1.13716	class2
FBtr0073035	0.0271134	class2
FBtr0073050	-0.0556361	class2
FBtr0073082	0.437687	class2
FBtr0073145	-0.66803	class2
FBtr0073163	-0.117419	class2
FBtr0073165	-1.14948	class2
FBtr0073187	0.078156	class2
FBtr0073219	-0.360325	class2
FBtr0073271	0.0277018	class2
FBtr0073291	0.740728	class2
FBtr0073310	-0.474113	class2
FBtr0073323	-0.711366	class2
FBtr0073337	0.144886	class2
FBtr0073345	0.151434	class2
FBtr0073457	0.0257187	class2
FBtr0073480	0.401853	class2
FBtr0073499	-0.0552294	class2
FBtr0073509	0.953048	class2
FBtr0073521	0.103034	class2
FBtr0073552	0.600111	class2
FBtr0073574	0.0644227	class2
FBtr0073580	-0.0339381	class2
FBtr0073600	-0.568513	class2
FBtr0073620	-0.518851	class2
FBtr0073641	-0.233422	class2
FBtr0073656	-0.317427	class2
FBtr0073658	0.133906	class2
FBtr0073712	-0.841503	class2
FBtr0073747	0.381149	class2
FBtr0073753	0.371153	class2
FBtr0073756	-0.103896	class2
FBtr0073757	0.0419038	class2
FBtr0073767	-0.525484	class2
FBtr0073787	0.22302	class2
FBtr0073843	-0.0541906	class2
FBtr0073847	-0.778188	class2
[truncated: 8,546 more rows]

## Sheet: Fig3D
Transcript_id	abs_log2Beta_CDS	Gene_class
FBtr0006151	-0.918987	No
FBtr0070000	-0.872387	No
FBtr0070002	-1.92995	No
FBtr0070006	-0.414936	No
FBtr0070007	-0.207519	No
FBtr0070008	-0.261735	No
FBtr0070027	-1.76416	No
FBtr0070036	0.56206	No
FBtr0070038	0.0569099	No
FBtr0070040	-0.180769	No
FBtr0070042	0.334868	No
FBtr0070045	0.669636	No
FBtr0070046	1.26876	No
FBtr0070058	0.0995489	No
FBtr0070064	0.458453	No
FBtr0070069	-1.27876	No
FBtr0070070	-0.946775	No
FBtr0070071	2.79273	No
FBtr0070077	-1.45665	No
FBtr0070078	-1.17104	No
FBtr0070079	-0.659411	No
FBtr0070087	-0.565365	No
FBtr0070088	0.0408946	No
FBtr0070089	-0.367329	No
FBtr0070092	0.128274	No
FBtr0070094	-0.264328	No
FBtr0070099	-2.56119	No
FBtr0070100	-2.19399	No
FBtr0070101	0.431184	No
FBtr0070106	-0.099971	No
FBtr0070108	-0.483051	No
FBtr0070110	-1.20981	No
FBtr0070115	-0.281673	No
FBtr0070116	-0.275441	No
FBtr0070119	-0.41058	No
FBtr0070121	0.132372	No
FBtr0070134	-0.0729667	No
FBtr0070135	-0.185993	No
FBtr0070139	0.670527	No
FBtr0070147	0.0353609	No
FBtr0070148	-0.614249	No
FBtr0070155	-0.279372	No
FBtr0070159	-1.32482	No
FBtr0070160	0.494875	No
FBtr0070165	0.354718	No
FBtr0070167	-0.212227	No
FBtr0070170	0.845461	No
FBtr0070173	-0.346667	No
FBtr0070174	0.311734	No
FBtr0070175	-0.890732	No
FBtr0070179	-0.409535	No
FBtr0070180	-0.93	No
FBtr0070183	0.0300958	No
FBtr0070185	-3.47222	No
FBtr0070186	-0.0939407	No
FBtr0070187	0.0132316	No
FBtr0070188	0.0461831	No
FBtr0070189	-8.46911	No
FBtr0070195	-0.00929693	No
FBtr0070197	-0.660455	No
FBtr0070200	-1.52326	No
FBtr0070201	0.537736	No
FBtr0070203	7.67364	No
FBtr0070205	0.861653	No
FBtr0070207	-2.22339	No
FBtr0070211	-1.10833	No
FBtr0070212	0.126897	No
FBtr0070213	1.51263	No
FBtr0070216	0.145738	No
FBtr0070230	-0.204762	No
FBtr0070231	2.06238	No
FBtr0070233	-0.0884623	No
FBtr0070234	-0.627474	No
FBtr0070236	0.634681	No
FBtr0070245	-0.908801	No
FBtr0070250	0.433605	No
FBtr0070254	0.939558	No
FBtr0070255	0.403619	No
FBtr0070257	-5.51488	No
FBtr0070269	-0.167532	No
FBtr0070272	0.514123	No
FBtr0070285	0.246671	No
FBtr0070289	-0.912117	No
FBtr0070295	-0.415005	No
FBtr0070296	-0.910155	No
FBtr0070297	-0.00554017	No
FBtr0070298	1.00154	No
FBtr0070310	-0.0771972	No
FBtr0070311	-0.0156329	No
FBtr0070312	0.253715	No
FBtr0070314	0.236541	No
FBtr0070315	0.00688179	No
FBtr0070321	-0.808054	No
FBtr0070328	-5.32217	No
FBtr0070331	-0.0674218	No
FBtr0070334	-0.00614984	No
FBtr0070338	0.21823	No
FBtr0070341	-0.188897	No
FBtr0070342	0.244443	No
FBtr0070347	-0.124129	No
FBtr0070349	0.326989	No
FBtr0070350	-0.510591	No
FBtr0070355	2.95516	No
FBtr0070364	-0.068862	No
FBtr0070365	-0.388927	No
FBtr0070366	0.321973	No
FBtr0070367	-0.279227	No
FBtr0070369	-0.12373	No
FBtr0070371	0.028701	No
FBtr0070372	-0.80556	No
FBtr0070375	-0.551089	No
FBtr0070376	0.402005	No
FBtr0070384	0.0185252	No
FBtr0070385	-0.306727	No
FBtr0070386	-0.520645	No
FBtr0070387	-0.395433	No
FBtr0070388	-1.6885	No
FBtr0070390	0.384453	No
FBtr0070392	0.0127257	No
FBtr0070396	0.0191837	No
FBtr0070398	-0.392532	No
FBtr0070407	2.39305	No
FBtr0070408	-0.287874	No
FBtr0070411	-0.466264	No
FBtr0070416	0.0414688	No
FBtr0070417	-0.821935	No
FBtr0070418	-0.250925	No
FBtr0070420	-1.2515	No
FBtr0070422	-0.768822	No
FBtr0070423	-2.33865	No
FBtr0070424	-2.4874	No
FBtr0070425	0.150948	No
FBtr0070428	-1.7741	No
FBtr0070431	-0.0859418	No
FBtr0070433	-0.509134	No
FBtr0070434	0.666492	No
FBtr0070437	0.065686	No
FBtr0070438	0.0817566	No
FBtr0070441	-0.670308	No
FBtr0070446	-0.231032	No
FBtr0070448	-0.698852	No
FBtr0070460	-1.2665	No
FBtr0070461	0.844304	No
FBtr0070477	-0.847643	No
FBtr0070478	0.601915	No
FBtr0070480	-0.942999	No
FBtr0070481	0.31814	No
FBtr0070484	-1.69379	No
FBtr0070485	-0.133353	No
FBtr0070486	-5.58202	No
FBtr0070487	1.09547	No
FBtr0070488	0.549763	No
FBtr0070490	-1.21218	No
FBtr0070491	0.0628126	No
FBtr0070495	-0.283377	No
FBtr0070497	-0.534849	No
FBtr0070498	0.0725156	No
FBtr0070499	-0.209615	No
FBtr0070502	-0.169397	No
FBtr0070504	1.0214	No
FBtr0070506	0.895972	No
FBtr0070509	0.266756	No
FBtr0070536	2.10722	No
FBtr0070543	0.540341	No
FBtr0070553	2.54013	No
FBtr0070558	0.212649	No
FBtr0070564	-0.656598	No
FBtr0070568	-0.110273	No
FBtr0070577	1.0976	No
FBtr0070586	-0.761011	No
FBtr0070588	0.788347	No
FBtr0070589	2.2182	No
FBtr0070590	-0.32565	No
FBtr0070612	1.2611	No
FBtr0070613	0.112369	No
FBtr0070616	-0.267404	No
FBtr0070624	0.927699	No
FBtr0070625	-0.641858	No
FBtr0070638	0.330122	No
FBtr0070639	-0.116364	No
FBtr0070642	0.814763	No
FBtr0070644	-0.172924	No
FBtr0070648	-0.460407	No
FBtr0070655	-0.450755	No
FBtr0070656	-0.499702	No
FBtr0070657	1.32001	No
FBtr0070659	0.512618	No
FBtr0070668	-0.190063	No
FBtr0070669	-0.365694	No
FBtr0070670	-0.0595587	No
FBtr0070674	-0.200643	No
FBtr0070675	-0.109386	No
FBtr0070676	-0.0508178	No
FBtr0070677	-0.239058	No
FBtr0070678	0.164511	No
FBtr0070681	-0.897215	No
FBtr0070682	0.618415	No
FBtr0070683	-0.00564295	No
FBtr0070689	2.09758	No
FBtr0070690	0.141866	No
FBtr0070698	-0.569987	No
FBtr0070699	0.278776	No
FBtr0070702	-0.441039	No
FBtr0070704	-1.61621	No
FBtr0070711	-0.0860676	No
FBtr0070712	-0.902376	No
FBtr0070717	-1.41541	No
FBtr0070721	0.971417	No
FBtr0070731	-1.64039	No
FBtr0070741	0.235106	No
FBtr0070748	-0.191929	No
FBtr0070749	2.80623	No
FBtr0070751	-0.289576	No
FBtr0070752	-0.568779	No
FBtr0070755	-2.94671	No
FBtr0070756	0.0661858	No
FBtr0070762	0.0116024	No
FBtr0070772	-0.502759	No
FBtr0070776	-0.287476	No
FBtr0070777	-0.444201	No
FBtr0070780	0.0545082	No
FBtr0070781	0.387254	No
FBtr0070782	-0.601645	No
FBtr0070785	0.816159	No
FBtr0070795	0.149425	No
FBtr0070797	-0.610245	No
FBtr0070799	-0.355973	No
FBtr0070800	-0.953484	No
FBtr0070802	-0.0723047	No
FBtr0070806	-3.71613	No
FBtr0070808	0.168505	No
FBtr0070809	0.112902	No
FBtr0070814	-0.199809	No
FBtr0070817	0.0699516	No
FBtr0070821	0.483877	No
FBtr0070822	0.0305887	No
FBtr0070824	-2.46482	No
FBtr0070825	-0.0773589	No
FBtr0070829	0.0291947	No
FBtr0070830	0.116867	No
FBtr0070832	-0.29143	No
FBtr0070836	0.235972	No
FBtr0070837	0.235893	No
FBtr0070840	0.465906	No
FBtr0070844	-0.373525	No
FBtr0070846	-0.933423	No
FBtr0070849	0.0272444	No
FBtr0070852	0.545745	No
FBtr0070859	-0.493699	No
FBtr0070860	0.407677	No
FBtr0070861	-0.793297	No
FBtr0070863	-6.00066	No
FBtr0070864	-0.157666	No
FBtr0070865	-0.389725	No
FBtr0070866	0.313627	No
FBtr0070867	-0.0469035	No
FBtr0070877	-0.254329	No
FBtr0070878	-4.3942	No
FBtr0070879	-6.24316	No
FBtr0070881	-0.508463	No
FBtr0070884	-0.500726	No
FBtr0070886	-0.635139	No
FBtr0070887	-0.295594	No
FBtr0070892	-1.43192	No
FBtr0070894	0.29692	No
FBtr0070895	1.09982	No
FBtr0070896	-0.176994	No
FBtr0070897	-0.0227946	No
FBtr0070898	0.120647	No
FBtr0070899	-0.183373	No
FBtr0070900	-0.166993	No
FBtr0070903	0.0793346	No
FBtr0070905	0.0330179	No
FBtr0070906	-0.456001	No
FBtr0070913	-0.186065	No
FBtr0070915	-1.03164	No
FBtr0070918	0.585005	No
FBtr0070922	-1.55895	No
FBtr0070925	-0.278488	No
FBtr0070926	3.33593	No
FBtr0070930	-0.0660993	No
FBtr0070933	-0.262067	No
FBtr0070946	0.184466	No
FBtr0070952	-0.0562519	No
FBtr0070953	-0.449446	No
FBtr0070960	0.150919	No
FBtr0070961	0.223653	No
FBtr0070963	-0.234507	No
FBtr0070969	0.842809	No
FBtr0070970	0.302721	No
FBtr0070980	-1.05794	No
FBtr0070989	0.47792	No
FBtr0070991	-0.251953	No
FBtr0070992	0.322675	No
FBtr0070993	-0.0400647	No
FBtr0071003	-0.342952	No
FBtr0071004	0.218639	No
FBtr0071009	-0.042559	No
FBtr0071019	0.0132015	No
FBtr0071032	-0.0381072	No
FBtr0071033	-0.32132	No
FBtr0071035	-2.52494	No
FBtr0071038	-0.15762	No
FBtr0071039	-0.0535776	No
FBtr0071046	3.09758	No
FBtr0071047	-0.684107	No
FBtr0071049	0.152692	No
FBtr0071051	-4.89345	No
FBtr0071054	1.51257	No
FBtr0071058	-1.1797	No
FBtr0071059	-0.617119	No
FBtr0071060	0.936399	No
FBtr0071065	-0.231874	No
FBtr0071070	0.0489122	No
FBtr0071072	0.225958	No
FBtr0071073	0.161447	No
FBtr0071077	0.127792	No
FBtr0071078	-0.229875	No
FBtr0071090	0.346046	No
FBtr0071091	-0.245407	No
FBtr0071094	-1.47222	No
FBtr0071096	0.267754	No
FBtr0071101	-0.160288	No
FBtr0071105	-0.158151	No
FBtr0071107	-0.268219	No
FBtr0071116	0.0456409	No
FBtr0071123	-0.0366843	No
FBtr0071129	0.0841461	No
FBtr0071131	-0.289732	No
FBtr0071133	0.705279	No
FBtr0071135	-0.951314	No
FBtr0071140	-0.0195382	No
FBtr0071142	-1.78849	No
FBtr0071143	-0.0393566	No
FBtr0071151	-0.264133	No
FBtr0071152	0.729202	No
FBtr0071155	-0.269179	No
FBtr0071157	0.27164	No
FBtr0071158	-0.18381	No
FBtr0071160	-5.01715	No
FBtr0071166	-0.14517	No
FBtr0071168	-0.136439	No
FBtr0071171	0.212306	No
FBtr0071178	-0.438441	No
FBtr0071179	-1.95859	No
FBtr0071180	-0.152959	No
FBtr0071183	-0.334891	No
FBtr0071186	0.190661	No
FBtr0071189	0.200693	No
FBtr0071190	-0.0664604	No
FBtr0071191	-0.405676	No
FBtr0071194	-0.0776784	No
FBtr0071198	-0.66981	No
FBtr0071201	-0.600327	No
FBtr0071202	2.70838	No
FBtr0071203	1.01273	No
FBtr0071204	2.78489	No
FBtr0071214	-0.00233006	No
FBtr0071218	-0.335055	No
FBtr0071221	0.327172	No
FBtr0071225	0.428579	No
FBtr0071228	-0.0347054	No
FBtr0071230	-0.717431	No
FBtr0071233	0.0976095	No
FBtr0071234	-0.242812	No
FBtr0071237	-1.52736	No
FBtr0071239	3.95515	No
FBtr0071240	-0.3712	No
FBtr0071241	-0.527241	No
FBtr0071244	-2.12256	No
FBtr0071245	-0.673664	No
FBtr0071248	5.34858	No
FBtr0071249	0.244157	No
FBtr0071250	-0.288195	No
FBtr0071251	0.0161853	No
FBtr0071255	0.153502	No
FBtr0071263	0.318852	No
FBtr0071266	-0.837131	No
FBtr0071268	-1.4776	No
FBtr0071270	0.34225	No
FBtr0071279	-0.682724	No
FBtr0071280	-0.0651499	No
FBtr0071281	-0.195218	No
FBtr0071284	-0.379203	No
FBtr0071285	-0.191829	No
FBtr0071286	-0.648947	No
FBtr0071287	0.476119	No
FBtr0071288	-0.0879818	No
FBtr0071289	-0.105111	No
FBtr0071293	0.483703	No
FBtr0071296	0.029005	No
FBtr0071300	-0.175924	No
FBtr0071304	-3.3041	No
FBtr0071305	-0.080455	No
FBtr0071306	0.270573	No
FBtr0071307	1.36849	No
FBtr0071308	3.92206	No
FBtr0071309	0.0147328	No
FBtr0071311	3.41946	No
FBtr0071313	-0.177075	No
FBtr0071314	0.00111195	No
FBtr0071317	0.3186	No
FBtr0071320	0.636226	No
FBtr0071324	0.182392	No
FBtr0071326	-0.199197	No
FBtr0071327	0.228396	No
FBtr0071331	0.318063	No
FBtr0071334	-0.119833	No
FBtr0071335	-0.227405	No
FBtr0071336	-0.293953	No
FBtr0071338	0.0529535	No
FBtr0071339	-0.0523639	No
FBtr0071342	0.69218	No
FBtr0071343	-0.365998	No
FBtr0071344	0.0227061	No
FBtr0071345	-0.481238	No
FBtr0071348	-0.224497	No
FBtr0071350	0.149189	No
FBtr0071353	0.268308	No
FBtr0071356	2.51253	No
FBtr0071358	0.886946	No
FBtr0071360	-1.02276	No
FBtr0071361	0.161079	No
FBtr0071367	-0.459674	No
FBtr0071372	-0.341502	No
FBtr0071373	0.0738222	No
FBtr0071379	0.134135	No
FBtr0071387	-0.406621	No
FBtr0071388	-0.502421	No
FBtr0071389	0.328384	No
FBtr0071390	-0.156485	No
FBtr0071391	-0.867446	No
FBtr0071393	0.183524	No
FBtr0071398	-0.455646	No
FBtr0071403	-6.33336	No
FBtr0071405	0.17098	No
FBtr0071410	0.61463	No
FBtr0071415	-0.0437452	No
FBtr0071419	-0.953426	No
FBtr0071424	-0.870338	No
FBtr0071429	0.333412	No
FBtr0071438	0.0765065	No
FBtr0071445	2.92357	No
FBtr0071446	0.0267156	No
FBtr0071448	0.512618	No
FBtr0071449	-0.441667	No
FBtr0071451	0.233339	No
FBtr0071458	-0.451497	No
FBtr0071462	3.95512	No
FBtr0071463	-0.13116	No
FBtr0071464	-0.65727	No
FBtr0071465	0.369485	No
FBtr0071470	0.236116	No
FBtr0071472	-0.218937	No
FBtr0071481	-1.07514	No
FBtr0071484	1.34272	No
FBtr0071486	4.04508	No
FBtr0071491	0.250842	No
FBtr0071492	-1.46137	No
FBtr0071494	0.0311105	No
FBtr0071497	0.0178257	No
FBtr0071498	-0.020849	No
FBtr0071500	-0.309965	No
FBtr0071502	-0.157686	No
FBtr0071503	-0.149349	No
FBtr0071510	-0.401043	No
FBtr0071511	0.075706	No
FBtr0071512	-2.92989	No
FBtr0071519	0.482574	No
FBtr0071520	0.582253	No
FBtr0071528	-0.0789894	No
FBtr0071530	0.201017	No
FBtr0071532	0.0757792	No
FBtr0071533	0.321786	No
FBtr0071541	0.532569	No
FBtr0071542	-6.0453	No
FBtr0071545	-0.42595	No
FBtr0071547	0.141776	No
FBtr0071549	-0.0860319	No
FBtr0071554	0.955234	No
FBtr0071555	-0.657282	No
FBtr0071556	-0.510915	No
FBtr0071559	-0.643267	No
FBtr0071560	-3.52877	No
FBtr0071561	-2.07229	No
FBtr0071569	-0.23948	No
FBtr0071576	0.0954433	No
FBtr0071580	0.34983	No
FBtr0071582	-0.0361938	No
FBtr0071592	-1.15488	No
FBtr0071600	-0.0665191	No
FBtr0071607	-0.633299	No
FBtr0071608	0.56524	No
FBtr0071611	1.65014	No
FBtr0071616	-1.64601	No
FBtr0071617	0.259236	No
FBtr0071618	0.616211	No
FBtr0071619	-2.0273	No
FBtr0071623	-0.56891	No
FBtr0071624	-0.850507	No
FBtr0071625	-0.430464	No
FBtr0071628	0.171303	No
FBtr0071639	-7.32172	No
FBtr0071658	-3.03	No
FBtr0071659	-4.41191	No
FBtr0071661	0.331757	No
FBtr0071663	0.0266217	No
FBtr0071666	-0.0182864	No
FBtr0071668	0.512618	No
FBtr0071670	-0.375313	No
FBtr0071673	-0.126456	No
FBtr0071675	-0.633211	No
FBtr0071676	0.187487	No
FBtr0071678	-0.586196	No
FBtr0071679	-0.0609079	No
FBtr0071680	0.500541	No
FBtr0071682	-1.40112	No
FBtr0071683	-0.169408	No
FBtr0071687	0.0163437	No
FBtr0071690	-0.0907549	No
FBtr0071695	1.91679	No
FBtr0071697	0.926098	No
FBtr0071701	-0.575624	No
FBtr0071708	-0.349552	No
FBtr0071716	-0.944212	No
FBtr0071726	0.298578	No
FBtr0071739	-2.36079	No
FBtr0071740	-4.18763	No
FBtr0071745	0.103974	No
FBtr0071746	-0.0575683	No
FBtr0071749	0.512618	No
FBtr0071760	0.306192	No
FBtr0071761	-0.674976	No
FBtr0071762	0.365809	No
FBtr0071766	1.51261	No
FBtr0071767	-0.137887	No
FBtr0071769	-0.0159177	No
FBtr0071770	-0.438441	No
FBtr0071771	-0.430968	No
FBtr0071779	-3.24578	No
FBtr0071781	-0.750407	No
FBtr0071782	-0.337971	No
FBtr0071784	0.169315	No
FBtr0071786	0.0127242	No
FBtr0071787	-0.0682662	No
FBtr0071790	-0.3559	No
FBtr0071799	-0.380427	No
FBtr0071802	-0.153023	No
FBtr0071803	3.77573	No
FBtr0071816	0.318412	No
FBtr0071820	-0.153153	No
FBtr0071821	0.358199	No
FBtr0071822	-0.110707	No
FBtr0071823	-0.0820829	No
FBtr0071826	0.690646	No
FBtr0071827	-0.534494	No
FBtr0071828	-1.1253	No
FBtr0071834	-0.154187	No
FBtr0071835	-1.10772	No
FBtr0071841	-0.683746	No
FBtr0071842	-0.0460023	No
FBtr0071843	-0.501391	No
FBtr0071848	-0.269375	No
FBtr0071853	2.1907	No
FBtr0071855	-0.824157	No
FBtr0071856	-0.430944	No
FBtr0071860	-0.00900131	No
FBtr0071861	1.62154	No
FBtr0071862	-2.10405	No
FBtr0071863	-3.58206	No
FBtr0071867	0.318145	No
FBtr0071870	1.73501	No
FBtr0071883	0.00104927	No
FBtr0071890	-2.6282	No
FBtr0071893	-4.46589	No
FBtr0071897	-0.541478	No
FBtr0071903	-0.558945	No
FBtr0071904	-0.410158	No
FBtr0071905	0.135609	No
FBtr0071910	-0.194635	No
FBtr0071911	0.862967	No
FBtr0071927	-1.68899	No
FBtr0071928	-1.80528	No
FBtr0071929	-1.42666	No
FBtr0071931	-0.788935	No
FBtr0071933	0.539814	No
FBtr0071935	-0.250716	No
FBtr0071937	-0.244542	No
FBtr0071938	-0.0264975	No
FBtr0071940	-3.73729	No
FBtr0071951	-0.375084	No
FBtr0071953	-0.84724	No
FBtr0071958	-0.148402	No
FBtr0071963	1.2496	No
FBtr0071967	0.512618	No
FBtr0071982	0.0996493	No
FBtr0071984	-0.0261726	No
FBtr0071985	0.0458462	No
FBtr0071988	-0.640223	No
FBtr0071989	-1.7891	No
FBtr0071995	1.66322	No
FBtr0071996	-0.494027	No
FBtr0072011	-1.09869	No
FBtr0072012	-0.0383658	No
FBtr0072014	0.473449	No
FBtr0072016	-5.94655	No
FBtr0072027	0.956796	No
FBtr0072029	-0.0342088	No
FBtr0072030	-0.452004	No
FBtr0072033	-0.206548	No
FBtr0072037	0.317712	No
FBtr0072038	0.162546	No
FBtr0072049	-2.90233	No
FBtr0072060	0.00857509	No
FBtr0072061	-0.441277	No
FBtr0072062	-0.412438	No
FBtr0072064	-0.229063	No
FBtr0072083	-0.099192	No
FBtr0072085	0.0966393	No
FBtr0072091	-0.141106	No
FBtr0072095	-0.988268	No
FBtr0072099	-0.578535	No
FBtr0072100	-0.0484605	No
FBtr0072109	9.37199	No
FBtr0072111	0.238327	No
FBtr0072112	-0.487294	No
FBtr0072114	0.11232	No
FBtr0072121	-4.49843	No
FBtr0072124	-0.0234416	No
FBtr0072128	-0.0185292	No
FBtr0072132	-0.666116	No
FBtr0072134	0.328996	No
FBtr0072141	-0.05245	No
FBtr0072143	0.243989	No
FBtr0072146	2.51469	No
FBtr0072147	-0.53106	No
FBtr0072150	-0.159924	No
FBtr0072151	-0.424893	No
FBtr0072152	0.489211	No
FBtr0072164	0.46631	No
FBtr0072165	0.0807091	No
FBtr0072169	-0.260148	No
FBtr0072172	-0.0796479	No
FBtr0072174	-0.846202	No
FBtr0072185	-1.03495	No
FBtr0072187	0.175902	No
FBtr0072188	-0.229751	No
FBtr0072190	0.609854	No
FBtr0072192	0.392561	No
FBtr0072193	0.0883154	No
FBtr0072194	-0.0779233	No
FBtr0072197	0.442278	No
FBtr0072202	-0.153011	No
FBtr0072208	0.202959	No
FBtr0072209	-0.291836	No
FBtr0072211	-0.459722	No
FBtr0072219	-0.951592	No
FBtr0072223	-0.282416	No
FBtr0072224	0.539111	No
FBtr0072226	0.0286943	No
FBtr0072233	0.155044	No
FBtr0072236	0.0782144	No
FBtr0072241	0.289909	No
FBtr0072242	-0.117097	No
FBtr0072253	-0.698558	No
FBtr0072255	0.593505	No
FBtr0072256	0.151192	No
FBtr0072258	-0.406209	No
FBtr0072261	-0.654552	No
FBtr0072264	0.331609	No
FBtr0072270	0.119348	No
FBtr0072271	-0.657196	No
FBtr0072272	0.583033	No
FBtr0072275	0.661078	No
FBtr0072277	-0.488588	No
FBtr0072280	-0.412599	No
FBtr0072288	-0.116101	No
FBtr0072300	0.512618	No
FBtr0072303	-0.375753	No
FBtr0072305	-0.0605982	No
FBtr0072307	-0.182935	No
FBtr0072308	-0.231984	No
FBtr0072309	0.002825	No
FBtr0072315	0.335725	No
FBtr0072317	-0.50512	No
FBtr0072320	-0.551769	No
FBtr0072321	-1.08849	No
FBtr0072323	0.238607	No
FBtr0072324	-0.497701	No
FBtr0072327	0.0423897	No
FBtr0072332	-0.119241	No
FBtr0072334	1.23052	No
FBtr0072335	-3.09203	No
FBtr0072336	-0.253631	No
FBtr0072337	-2.12293	No
FBtr0072339	0.0248264	No
FBtr0072343	0.22741	No
FBtr0072344	-0.227451	No
FBtr0072347	-0.499592	No
FBtr0072355	-4.82578	No
FBtr0072370	0.618438	No
FBtr0072374	-0.571567	No
FBtr0072375	0.00655335	No
FBtr0072392	0.100267	No
FBtr0072393	0.152744	No
FBtr0072395	0.181973	No
FBtr0072399	0.72129	No
FBtr0072401	-0.183586	No
FBtr0072403	-0.154872	No
FBtr0072404	0.216249	No
FBtr0072405	-0.686383	No
FBtr0072409	-0.0807266	No
FBtr0072410	-3.85885	No
FBtr0072411	-0.191605	No
FBtr0072412	-0.0516552	No
FBtr0072413	-0.276679	No
FBtr0072417	0.200412	No
FBtr0072420	1.07319	No
FBtr0072425	0.380545	No
FBtr0072426	0.391939	No
FBtr0072436	-0.360296	No
FBtr0072437	-0.0566649	No
FBtr0072449	-0.899219	No
FBtr0072454	2.21524	No
FBtr0072455	1.64162	No
FBtr0072463	-3.96353	No
FBtr0072476	-0.286839	No
FBtr0072477	0.255766	No
FBtr0072480	0.0777097	No
FBtr0072483	-0.294759	No
FBtr0072484	-0.121747	No
FBtr0072486	0.11601	No
FBtr0072499	1.13574	No
FBtr0072501	-1.7027	No
FBtr0072503	-0.366474	No
FBtr0072504	0.547234	No
FBtr0072519	-0.593042	No
FBtr0072524	-0.610721	No
FBtr0072526	0.0928487	No
FBtr0072534	0.0120268	No
FBtr0072537	-0.148963	No
FBtr0072539	-0.0628672	No
FBtr0072540	-0.912368	No
FBtr0072546	0.29767	No
FBtr0072548	-0.00695735	No
FBtr0072550	-0.311442	No
FBtr0072557	-0.78506	No
FBtr0072558	0.377684	No
FBtr0072561	-0.0267081	No
FBtr0072563	0.210207	No
FBtr0072564	-0.116695	No
FBtr0072569	-0.122912	No
FBtr0072571	-1.32415	No
FBtr0072576	-0.1404	No
FBtr0072578	-0.048354	No
FBtr0072583	-0.292773	No
FBtr0072585	-1.2519	No
FBtr0072586	0.567088	No
FBtr0072599	-0.165405	No
FBtr0072601	-0.553155	No
FBtr0072606	0.149784	No
FBtr0072608	-4.45545	No
FBtr0072609	-4.10616	No
FBtr0072621	-0.330051	No
FBtr0072625	-0.256234	No
FBtr0072627	-0.089532	No
FBtr0072628	-1.91329	No
FBtr0072630	-4.89869	No
FBtr0072631	-4.1878	No
FBtr0072633	0.235963	No
FBtr0072634	-3.83962	No
FBtr0072635	0.131261	No
FBtr0072637	-1.54174	No
FBtr0072638	0.137432	No
FBtr0072651	-0.441033	No
FBtr0072655	-1.07229	No
FBtr0072659	0.120089	No
FBtr0072663	0.106034	No
FBtr0072667	0.370807	No
FBtr0072668	-0.512481	No
FBtr0072674	-1.37088	No
FBtr0072678	0.114096	No
FBtr0072680	-0.245842	No
FBtr0072681	0.51531	No
FBtr0072694	0.76862	No
FBtr0072699	-0.639823	No
FBtr0072706	-0.436324	No
FBtr0072709	-0.138675	No
FBtr0072712	-1.0773	No
FBtr0072718	0.146996	No
FBtr0072720	1.24966	No
FBtr0072721	-0.347324	No
FBtr0072723	-0.188658	No
FBtr0072724	-0.0304919	No
FBtr0072725	1.99804	No
FBtr0072727	-0.785725	No
FBtr0072730	-0.252753	No
FBtr0072731	-1.44153	No
FBtr0072733	-1.44141	No
FBtr0072734	-1.27161	No
FBtr0072738	0.152129	No
FBtr0072754	-0.171944	No
FBtr0072757	-0.92626	No
FBtr0072759	-0.394241	No
FBtr0072761	-0.269312	No
FBtr0072763	0.320127	No
FBtr0072773	0.091108	No
FBtr0072774	-0.163623	No
FBtr0072775	-0.263728	No
FBtr0072776	-0.344699	No
FBtr0072777	-0.0591871	No
FBtr0072784	-0.114729	No
FBtr0072786	0.271087	No
FBtr0072790	-0.533719	No
FBtr0072791	0.229341	No
FBtr0072795	-0.0788132	No
FBtr0072796	-2.65723	No
FBtr0072797	-0.0585043	No
FBtr0072800	-0.511922	No
FBtr0072802	-3.11426	No
FBtr0072805	-0.799124	No
FBtr0072809	-0.52293	No
FBtr0072810	-0.795576	No
FBtr0072811	-0.215762	No
FBtr0072814	0.186328	No
FBtr0072821	-1.15637	No
FBtr0072822	-0.883192	No
FBtr0072823	-0.0211446	No
FBtr0072825	0.0863976	No
FBtr0072832	0.0373237	No
FBtr0072836	-0.779282	No
FBtr0072841	0.235696	No
FBtr0072842	-0.349569	No
FBtr0072844	0.159278	No
FBtr0072845	-2.15976	No
FBtr0072856	0.101818	No
FBtr0072866	0.204431	No
FBtr0072867	0.0181081	No
FBtr0072869	0.56125	No
FBtr0072874	-2.21262	No
FBtr0072877	-0.0567221	No
FBtr0072878	0.475072	No
FBtr0072881	-0.0723018	No
FBtr0072883	1.89118	No
FBtr0072889	0.1941	No
FBtr0072890	-0.218642	No
FBtr0072899	-0.206598	No
FBtr0072900	-0.311539	No
FBtr0072902	-3.87551	No
FBtr0072903	-0.318002	No
FBtr0072910	0.234312	No
FBtr0072913	-2.11956	No
FBtr0072916	-1.54857	No
FBtr0072924	-0.661469	No
FBtr0072926	0.406183	No
FBtr0072929	-1.16696	No
FBtr0072937	0.318392	No
FBtr0072938	-3.03805	No
FBtr0072948	-0.400578	No
FBtr0072949	-1.79986	No
FBtr0072962	-2.73736	No
FBtr0072967	-0.225409	No
FBtr0072968	-4.26152	No
FBtr0072969	-0.0943739	No
FBtr0072977	-2.51709	No
FBtr0072978	-0.0709546	No
FBtr0072982	-0.871577	No
FBtr0072985	-0.556968	No
FBtr0072987	-0.161185	No
FBtr0072990	-0.425924	No
FBtr0073005	0.137369	No
FBtr0073015	0.0774788	No
FBtr0073016	-0.146447	No
FBtr0073027	-0.146151	No
FBtr0073029	0.179749	No
FBtr0073033	0.00825217	No
FBtr0073034	-0.0441271	No
FBtr0073037	-2.44444	No
FBtr0073040	-0.125473	No
FBtr0073042	0.0978233	No
FBtr0073044	-0.373752	No
FBtr0073046	0.089628	No
FBtr0073059	7.33704	No
FBtr0073061	0.188983	No
FBtr0073062	-0.0820113	No
FBtr0073068	0.0734238	No
FBtr0073069	1.04314	No
FBtr0073073	1.02087	No
FBtr0073075	-0.199205	No
FBtr0073076	0.369341	No
FBtr0073077	-0.00211226	No
FBtr0073078	0.0351837	No
FBtr0073084	-0.151505	No
FBtr0073086	-1.09759	No
FBtr0073095	-1.1007	No
FBtr0073103	-1.05437	No
FBtr0073105	-0.772046	No
FBtr0073106	-0.159466	No
FBtr0073109	0.275055	No
FBtr0073111	-1.81339	No
FBtr0073112	-1.5539	No
FBtr0073113	-0.246131	No
FBtr0073127	-2.67862	No
FBtr0073141	-0.709743	No
FBtr0073142	-0.410149	No
FBtr0073144	-0.391967	No
FBtr0073147	-0.93	No
FBtr0073148	-0.645384	No
FBtr0073149	-0.348693	No
FBtr0073151	-0.0948991	No
FBtr0073154	0.40911	No
FBtr0073157	-0.0854602	No
FBtr0073159	-0.829364	No
FBtr0073160	0.0953723	No
FBtr0073171	0.0385535	No
FBtr0073172	2.12801	No
FBtr0073174	-0.268117	No
FBtr0073177	0.818484	No
FBtr0073180	-0.262949	No
FBtr0073182	0.586637	No
FBtr0073184	0.305169	No
FBtr0073193	0.180589	No
FBtr0073194	0.63817	No
FBtr0073195	-1.48733	No
FBtr0073196	-1.79216	No
FBtr0073200	1.77567	No
FBtr0073201	-0.487351	No
FBtr0073202	0.452278	No
FBtr0073204	-2.33088	No
FBtr0073208	-2.38779	No
FBtr0073212	0.259258	No
FBtr0073213	-2.90236	No
FBtr0073214	-0.634905	No
FBtr0073218	-0.767642	No
FBtr0073223	2.41951	No
FBtr0073225	0.378415	No
FBtr0073227	-1.84889	No
FBtr0073228	-0.354147	No
FBtr0073229	-0.0432915	No
FBtr0073231	-0.0723125	No
FBtr0073232	-0.0122906	No
FBtr0073233	-0.40373	No
FBtr0073234	-0.0581776	No
FBtr0073235	-0.356994	No
FBtr0073243	-0.353019	No
FBtr0073244	-0.204798	No
FBtr0073245	-0.471661	No
FBtr0073250	0.0970232	No
FBtr0073252	-0.127456	No
FBtr0073254	1.22837	No
FBtr0073256	0.380663	No
FBtr0073263	0.25468	No
FBtr0073264	0.30963	No
FBtr0073270	-0.286478	No
FBtr0073278	0.109049	No
FBtr0073286	0.155714	No
FBtr0073288	0.00963375	No
FBtr0073301	0.0485797	No
FBtr0073302	3.37022	No
FBtr0073308	-0.498486	No
FBtr0073317	0.0448373	No
FBtr0073322	-0.14494	No
FBtr0073335	0.0284923	No
FBtr0073338	-0.23127	No
FBtr0073340	-0.302149	No
FBtr0073341	0.360654	No
FBtr0073346	-1.92996	No
FBtr0073352	0.0468598	No
FBtr0073353	-2.50882	No
FBtr0073358	1.73503	No
FBtr0073361	0.512618	No
FBtr0073362	1.1279	No
FBtr0073365	2.09752	No
FBtr0073373	-1.66694	No
FBtr0073374	0.512618	No
FBtr0073375	0.155709	No
FBtr0073376	0.209865	No
FBtr0073378	-0.483183	No
FBtr0073379	-0.280466	No
FBtr0073380	-0.372019	No
FBtr0073381	0.333402	No
FBtr0073386	-0.287573	No
FBtr0073390	-0.554477	No
FBtr0073392	-0.443254	No
FBtr0073396	0.329767	No
FBtr0073403	0.241347	No
FBtr0073410	-0.299834	No
FBtr0073411	-0.620921	No
FBtr0073412	-0.334748	No
FBtr0073422	-0.741978	No
FBtr0073425	-3.59899	No
FBtr0073427	0.0420622	No
FBtr0073428	-0.0875772	No
FBtr0073429	-0.0408186	No
FBtr0073434	0.192657	No
FBtr0073436	-0.0970653	No
FBtr0073438	-0.749492	No
FBtr0073439	0.116057	No
FBtr0073440	-0.110665	No
FBtr0073441	-0.0658718	No
FBtr0073446	1.51255	No
FBtr0073450	3.09751	No
FBtr0073452	0.0165027	No
FBtr0073468	0.893053	No
FBtr0073469	0.520865	No
FBtr0073470	0.715214	No
FBtr0073471	-0.054019	No
FBtr0073473	-0.0475838	No
FBtr0073474	-0.0619744	No
FBtr0073505	0.258523	No
FBtr0073506	-0.280719	No
FBtr0073510	0.236478	No
FBtr0073512	-0.159017	No
FBtr0073513	0.399685	No
FBtr0073516	0.922703	No
FBtr0073518	-0.231293	No
FBtr0073520	-0.121042	No
FBtr0073531	3.83771	No
FBtr0073535	0.412556	No
FBtr0073536	-0.140425	No
FBtr0073537	-0.946819	No
FBtr0073539	-0.425295	No
FBtr0073541	-0.203558	No
FBtr0073543	-0.274334	No
FBtr0073547	-2.51528	No
FBtr0073551	-0.582934	No
FBtr0073555	1.82073	No
FBtr0073556	1.32142	No
FBtr0073562	-0.204808	No
FBtr0073569	0.411339	No
FBtr0073570	0.219944	No
FBtr0073571	1.0595	No
FBtr0073572	0.205852	No
FBtr0073573	-0.906133	No
FBtr0073578	0.66662	No
FBtr0073581	-0.0543976	No
FBtr0073594	-0.348303	No
FBtr0073596	0.296696	No
FBtr0073600	-0.568513	No
FBtr0073601	-0.293149	No
FBtr0073602	-0.299942	No
FBtr0073604	0.29143	No
FBtr0073608	-0.437511	No
FBtr0073612	-0.0723202	No
FBtr0073613	0.305196	No
FBtr0073621	-0.0470054	No
FBtr0073622	0.226473	No
FBtr0073623	-2.00492	No
FBtr0073635	1.09758	No
FBtr0073640	-0.916486	No
FBtr0073642	-0.146569	No
FBtr0073650	1.0362	No
FBtr0073652	-1.59958	No
FBtr0073653	0.468525	No
FBtr0073675	0.0530163	No
FBtr0073680	-0.330141	No
FBtr0073685	0.597462	No
FBtr0073687	-0.94895	No
FBtr0073688	-0.445857	No
FBtr0073690	0.181503	No
FBtr0073693	0.262175	No
FBtr0073694	-0.114451	No
FBtr0073697	-0.483688	No
FBtr0073698	2.74116	No
FBtr0073699	2.59267	No
FBtr0073702	-0.052883	No
FBtr0073709	-0.223562	No
FBtr0073712	-0.841503	No
FBtr0073721	-0.359531	No
FBtr0073722	0.785415	No
FBtr0073723	-1.46423	No
FBtr0073725	-0.377505	No
FBtr0073726	-0.336868	No
FBtr0073727	2.1024	No
FBtr0073734	1.24962	No
FBtr0073737	-0.440954	No
FBtr0073738	-1.92995	No
FBtr0073741	-0.0129986	No
FBtr0073745	2.09752	No
FBtr0073752	-3.21664	No
FBtr0073753	0.371153	No
FBtr0073755	-0.0520258	No
FBtr0073757	0.0419038	No
FBtr0073763	-0.128749	No
FBtr0073766	-0.180362	No
FBtr0073769	0.102119	No
FBtr0073775	-0.108784	No
FBtr0073777	-0.586541	No
FBtr0073778	-0.0487186	No
FBtr0073789	0.120069	No
FBtr0073792	-0.810716	No
FBtr0073796	0.481206	No
FBtr0073800	-8.5465	No
FBtr0073805	-0.0458633	No
FBtr0073806	-1.75992	No
FBtr0073809	-0.731274	No
FBtr0073811	-8.05919	No
FBtr0073812	-0.340238	No
FBtr0073817	-0.546482	No
FBtr0073818	-0.0367078	No
FBtr0073819	-0.143415	No
FBtr0073820	-0.236671	No
FBtr0073821	-1.58568	No
FBtr0073827	-0.0501071	No
FBtr0073828	-1.08583	No
FBtr0073835	-0.272932	No
FBtr0073838	0.347303	No
FBtr0073839	-2.45696	No
FBtr0073840	-0.0855194	No
FBtr0073842	-0.460544	No
FBtr0073848	0.236901	No
FBtr0073850	0.127986	No
FBtr0073851	-0.343116	No
FBtr0073854	-1.92994	No
FBtr0073855	-0.000693121	No
FBtr0073891	-1.87644	No
FBtr0073894	0.484632	No
FBtr0073898	-0.869632	No
FBtr0073899	0.0122126	No
FBtr0073902	-0.379888	No
FBtr0073903	0.695252	No
FBtr0073904	-0.624855	No
FBtr0073920	0.174928	No
FBtr0073922	-0.369466	No
FBtr0073926	0.156941	No
FBtr0073928	-2.87962	No
FBtr0073933	-0.0664736	No
FBtr0073937	-1.08647	No
FBtr0073938	-4.50065	No
FBtr0073941	1.19068	No
FBtr0073942	-0.379385	No
FBtr0073944	2.39341	No
FBtr0073945	-0.227445	No
FBtr0073948	-4.51483	No
FBtr0073957	-0.46476	No
FBtr0073960	-0.468771	No
FBtr0073961	-0.183843	No
FBtr0073962	0.682563	No
FBtr0073964	0.00592294	No
FBtr0073965	-0.0548861	No
FBtr0073966	-0.0261435	No
FBtr0073967	-0.130838	No
FBtr0073968	-0.299971	No
FBtr0073972	-0.029347	No
FBtr0073976	-1.42503	No
FBtr0073977	-0.269171	No
FBtr0073978	-2.02117	No
FBtr0073979	0.0125682	No
FBtr0073980	0.412244	No
FBtr0073983	0.403021	No
FBtr0073984	-0.508563	No
FBtr0073985	-0.101683	No
FBtr0073986	-0.321572	No
FBtr0073988	-0.183709	No
FBtr0073989	-0.0271851	No
FBtr0074001	0.299058	No
FBtr0074005	0.391543	No
FBtr0074007	1.90496	No
FBtr0074011	-0.397564	No
FBtr0074015	0.927676	No
FBtr0074017	2.51255	No
FBtr0074018	-0.00516448	No
FBtr0074019	1.28046	No
FBtr0074020	0.200703	No
FBtr0074027	-1.41189	No
FBtr0074028	-0.359728	No
FBtr0074030	-0.209284	No
FBtr0074031	-0.291721	No
FBtr0074032	-1.50907	No
FBtr0074034	0.275798	No
FBtr0074036	1.33477	No
FBtr0074039	0.0898692	No
FBtr0074042	-0.320783	No
FBtr0074045	-0.574065	No
FBtr0074046	0.0498379	No
FBtr0074047	-0.203573	No
FBtr0074055	-0.334234	No
FBtr0074056	-0.516672	No
FBtr0074058	0.1189	No
FBtr0074060	-0.196407	No
FBtr0074066	-0.0357313	No
FBtr0074071	-0.505562	No
FBtr0074074	-0.549468	No
FBtr0074075	0.868502	No
FBtr0074076	-0.904104	No
FBtr0074077	-0.447848	No
FBtr0074079	-0.467785	No
FBtr0074083	-0.0163391	No
FBtr0074086	-0.00368148	No
FBtr0074087	-0.147501	No
FBtr0074090	0.476387	No
FBtr0074094	0.244243	No
FBtr0074095	1.57144	No
FBtr0074097	0.00257339	No
FBtr0074098	-2.66695	No
FBtr0074105	-0.980287	No
FBtr0074112	0.122167	No
FBtr0074132	-0.246081	No
FBtr0074133	2.83454	No
FBtr0074135	0.350912	No
FBtr0074138	-0.20255	No
FBtr0074151	-0.128344	No
FBtr0074168	0.677378	No
FBtr0074176	-0.265888	No
FBtr0074178	-0.20417	No
FBtr0074184	1.44047	No
FBtr0074185	0.535194	No
FBtr0074192	6.09273	No
FBtr0074193	-3.13032	No
FBtr0074203	-0.374185	No
FBtr0074210	0.0907136	No
FBtr0074211	0.197172	No
FBtr0074216	0.150046	No
FBtr0074217	-0.193772	No
FBtr0074222	-0.19784	No
FBtr0074233	-0.00990037	No
FBtr0074236	-0.447028	No
FBtr0074238	-0.263181	No
FBtr0074241	-0.0740623	No
FBtr0074246	0.0413028	No
FBtr0074257	-0.312542	No
FBtr0074268	-0.42629	No
FBtr0074271	0.290464	No
FBtr0074275	-2.75411	No
FBtr0074278	-0.728993	No
FBtr0074282	0.366128	No
FBtr0074283	-0.513286	No
FBtr0074287	-2.48732	No
FBtr0074288	0.240483	No
FBtr0074292	0.0916894	No
FBtr0074296	0.777707	No
FBtr0074297	-3.95826	No
FBtr0074300	-0.849999	No
FBtr0074301	2.16992	No
FBtr0074303	0.538235	No
FBtr0074304	-1.26496	No
FBtr0074311	-0.512697	No
FBtr0074315	-0.316555	No
FBtr0074318	-2.51488	No
FBtr0074321	-3.42594	No
FBtr0074322	3.73501	No
FBtr0074324	-3.34505	No
FBtr0074326	1.51262	No
FBtr0074330	-0.324138	No
FBtr0074331	-0.325814	No
FBtr0074332	0.0235674	No
FBtr0074333	0.369995	No
FBtr0074334	0.0837224	No
FBtr0074335	-0.517724	No
FBtr0074336	0.451881	No
FBtr0074339	0.232582	No
FBtr0074341	-0.106352	No
FBtr0074342	0.759198	No
FBtr0074346	-3.3449	No
FBtr0074347	0.300976	No
FBtr0074352	0.29275	No
FBtr0074354	-0.0533868	No
FBtr0074355	0.593575	No
FBtr0074356	0.268435	No
FBtr0074361	-3.60282	No
FBtr0074362	-2.94409	No
FBtr0074363	-3.05992	No
FBtr0074364	-2.28144	No
FBtr0074373	5.54005	No
FBtr0074375	-4.88819	No
FBtr0074376	-0.930729	No
FBtr0074377	0.0481163	No
FBtr0074381	0.0626149	No
FBtr0074387	0.0218508	No
FBtr0074391	-4.51483	No
FBtr0074392	0.397173	No
FBtr0074393	-0.0150476	No
FBtr0074394	-0.503653	No
FBtr0074402	2.19068	No
FBtr0074404	-0.221141	No
FBtr0074405	-1.0723	No
FBtr0074406	-0.574185	No
FBtr0074410	-0.79607	No
FBtr0074415	-0.38213	No
FBtr0074417	0.0647295	No
FBtr0074418	0.896875	No
FBtr0074425	-0.0224094	No
FBtr0074429	0.899928	No
FBtr0074430	-0.221625	No
FBtr0074431	0.177693	No
FBtr0074436	1.04698	No
FBtr0074437	0.5126	No
FBtr0074438	-0.600701	No
FBtr0074440	-0.39061	No
FBtr0074443	0.142336	No
FBtr0074444	-2.39786	No
FBtr0074446	-0.0467918	No
FBtr0074447	-2.03919	No
FBtr0074452	-0.169866	No
FBtr0074453	-0.187126	No
FBtr0074455	0.182978	No
FBtr0074461	0.802182	No
FBtr0074462	-0.119953	No
FBtr0074463	-0.350459	No
FBtr0074465	-0.362189	No
FBtr0074466	-4.65237	No
FBtr0074467	-0.714639	No
FBtr0074468	-0.0283598	No
FBtr0074472	-0.533893	No
FBtr0074475	-0.49912	No
FBtr0074476	0.328666	No
FBtr0074484	0.371487	No
FBtr0074485	-1.87965	No
FBtr0074493	-0.344249	No
FBtr0074494	4.04274	No
FBtr0074504	0.168327	No
FBtr0074511	0.260427	No
FBtr0074514	-0.309642	No
FBtr0074515	0.219609	No
FBtr0074524	-0.347659	No
FBtr0074530	-0.355667	No
FBtr0074540	1.05576	No
FBtr0074544	-1.12097	No
FBtr0074545	-0.00777642	No
FBtr0074546	0.337112	No
FBtr0074549	-1.92996	No
FBtr0074553	-0.0492565	No
FBtr0074558	0.14747	No
FBtr0074559	0.835069	No
FBtr0074563	-1.06741	No
FBtr0074568	-0.224317	No
FBtr0074576	-0.662754	No
FBtr0074577	-0.274524	No
FBtr0074578	0.244379	No
FBtr0074592	-0.224317	No
FBtr0074596	-0.0722969	No
FBtr0074601	0.011577	No
FBtr0074602	0.393618	No
FBtr0074603	-0.115531	No
FBtr0074604	-1.70034	No
FBtr0074614	-0.891616	No
FBtr0074615	-0.0502977	No
FBtr0074616	0.104175	No
FBtr0074621	1.9281	No
FBtr0074622	-0.27011	No
FBtr0074624	-0.0230612	No
FBtr0074626	-2.83084	No
FBtr0074628	0.379599	No
FBtr0074629	-0.354809	No
FBtr0074631	0.859086	No
FBtr0074634	0.499695	No
FBtr0074639	-0.219192	No
FBtr0074640	0.181339	No
FBtr0074643	0.00804848	No
FBtr0074644	0.0198858	No
FBtr0074647	0.304592	No
FBtr0074652	0.0680615	No
FBtr0074653	0.770767	No
FBtr0074654	-0.101992	No
FBtr0074656	1.18647	No
FBtr0074660	0.0976103	No
FBtr0074661	0.226874	No
FBtr0074664	2.95519	No
FBtr0074665	-0.64486	No
FBtr0074669	-1.5491	No
FBtr0074671	-0.952987	No
FBtr0074672	-2.41713	No
FBtr0074675	0.095076	No
FBtr0074676	-0.296528	No
FBtr0074682	-0.301832	No
FBtr0074686	0.00607954	No
FBtr0074687	0.908336	No
FBtr0074688	-1.14836	No
FBtr0074690	-2.52376	No
FBtr0074692	-2.72922	No
FBtr0074693	0.553718	No
FBtr0074696	1.12361	No
FBtr0074697	-0.729728	No
FBtr0074701	0.421532	No
FBtr0074710	-2.73727	No
FBtr0074711	-0.16771	No
FBtr0074712	-0.00350523	No
FBtr0074716	0.339951	No
FBtr0074731	-0.60795	No
FBtr0074734	-0.192	No
FBtr0074736	1.9276	No
FBtr0074737	-0.166066	No
FBtr0074740	0.193101	No
FBtr0074741	-0.63099	No
FBtr0074742	2.63327	No
FBtr0074743	0.930948	No
FBtr0074745	-0.447685	No
FBtr0074746	0.183756	No
FBtr0074747	0.191078	No
FBtr0074748	-0.106449	No
FBtr0074751	0.438061	No
FBtr0074753	-0.0523085	No
FBtr0074754	-0.688043	No
FBtr0074756	-0.158465	No
FBtr0074759	-0.391099	No
FBtr0074761	-0.950301	No
FBtr0074767	0.00987939	No
FBtr0074768	-0.265341	No
FBtr0074769	0.635497	No
FBtr0074783	-0.68682	No
FBtr0074785	0.198567	No
FBtr0074786	-0.054973	No
FBtr0074787	0.0099513	No
FBtr0074789	-0.024015	No
FBtr0074793	-0.248406	No
FBtr0074798	-0.522156	No
FBtr0074807	0.0425297	No
FBtr0074809	-0.976386	No
FBtr0074813	-0.0274207	No
FBtr0074814	-0.633723	No
FBtr0074815	-0.560942	No
FBtr0074818	3.5402	No
FBtr0074819	-0.0863522	No
FBtr0074820	-0.399564	No
FBtr0074827	1.28131	No
FBtr0074828	-0.162545	No
FBtr0074830	-0.158745	No
FBtr0074839	-0.270496	No
FBtr0074845	-0.330416	No
FBtr0074849	-0.187805	No
FBtr0074859	-1.48732	No
FBtr0074867	-0.0641784	No
FBtr0074868	-3.11048	No
FBtr0074869	-0.865507	No
FBtr0074872	-0.124259	No
FBtr0074880	-0.0410116	No
FBtr0074884	-0.0502886	No
FBtr0074888	-0.696629	No
FBtr0074893	-0.381158	No
FBtr0074894	0.327492	No
FBtr0074895	-0.446797	No
FBtr0074896	0.158633	No
FBtr0074904	-0.617401	No
FBtr0074907	1.98213	No
FBtr0074908	0.27688	No
FBtr0074910	-6.08056	No
FBtr0074913	0.682311	No
FBtr0074915	-0.354381	No
FBtr0074918	-0.131712	No
FBtr0074925	-0.708185	No
FBtr0074927	-0.104601	No
FBtr0074928	0.183525	No
FBtr0074933	0.987178	No
FBtr0074936	-4.21525	No
FBtr0074938	-0.194869	No
FBtr0074940	-0.92938	No
FBtr0074944	0.349337	No
FBtr0074945	0.612204	No
FBtr0074946	0.508676	No
FBtr0074949	0.215402	No
FBtr0074953	0.105736	No
FBtr0074961	-0.100048	No
FBtr0074966	-0.275194	No
FBtr0074969	0.27164	No
FBtr0074971	-0.160708	No
FBtr0074972	-0.157728	No
FBtr0074974	-0.199068	No
FBtr0074978	-0.473529	No
FBtr0074979	-0.145731	No
FBtr0074987	-1.34493	No
FBtr0074988	-0.0199735	No
FBtr0074998	-0.285305	No
FBtr0075014	-0.53189	No
FBtr0075017	0.00324007	No
FBtr0075024	-1.46438	No
FBtr0075032	-0.708565	No
FBtr0075034	0.13376	No
FBtr0075038	0.512635	No
FBtr0075040	-1.2349	No
FBtr0075041	-0.0647024	No
FBtr0075048	-4.09783	No
FBtr0075050	0.472223	No
FBtr0075054	-0.0608672	No
FBtr0075055	0.238994	No
FBtr0075056	-0.125301	No
FBtr0075058	0.33643	No
FBtr0075063	-0.0818164	No
FBtr0075065	0.904947	No
FBtr0075066	-0.582925	No
FBtr0075067	0.313966	No
FBtr0075068	-0.360115	No
FBtr0075069	-3.42223	No
FBtr0075074	-0.161286	No
FBtr0075075	0.344639	No
FBtr0075076	0.071883	No
FBtr0075080	0.786568	No
FBtr0075081	-0.286985	No
FBtr0075086	0.0175146	No
FBtr0075088	0.344981	No
FBtr0075091	-0.201887	No
FBtr0075092	0.184845	No
FBtr0075094	0.440227	No
FBtr0075098	-0.533146	No
FBtr0075099	2.09752	No
FBtr0075108	-3.18775	No
FBtr0075117	-0.374276	No
FBtr0075119	-1.03166	No
FBtr0075120	1.30619	No
FBtr0075121	0.464292	No
FBtr0075129	-1.35891	No
FBtr0075130	1.19713	No
FBtr0075135	-0.874848	No
FBtr0075141	0.353625	No
FBtr0075143	0.785248	No
FBtr0075147	-0.487317	No
FBtr0075148	-0.361796	No
FBtr0075152	-0.022281	No
FBtr0075154	-0.0234216	No
FBtr0075157	-3.41692	No
FBtr0075162	-0.807665	No
FBtr0075167	-0.206465	No
FBtr0075169	-0.507111	No
FBtr0075170	0.0806119	No
FBtr0075171	-1.20592	No
FBtr0075174	5.31017	No
FBtr0075175	-1.38258	No
FBtr0075181	-2.53306	No
FBtr0075184	-0.0706366	No
FBtr0075187	0.0619858	No
FBtr0075190	-1.27182	No
FBtr0075192	-3.46339	No
FBtr0075194	0.398965	No
FBtr0075197	0.195345	No
FBtr0075199	-0.324492	No
FBtr0075201	0.192617	No
FBtr0075205	-0.196665	No
FBtr0075207	-0.853559	No
FBtr0075208	0.284124	No
FBtr0075209	0.184269	No
FBtr0075210	0.0573182	No
FBtr0075216	-4.5148	No
FBtr0075217	-0.336405	No
FBtr0075218	0.0812658	No
FBtr0075221	0.319155	No
FBtr0075222	-0.196803	No
FBtr0075223	0.628118	No
FBtr0075227	-0.338129	No
FBtr0075230	-0.203558	No
FBtr0075231	-0.179015	No
FBtr0075245	0.0155054	No
FBtr0075249	-1.345	No
FBtr0075251	-0.222376	No
FBtr0075258	-0.976405	No
FBtr0075274	-0.208241	No
FBtr0075278	0.150545	No
FBtr0075282	0.07703	No
FBtr0075284	-0.372104	No
FBtr0075286	1.11457	No
FBtr0075290	0.577752	No
FBtr0075291	-0.70972	No
FBtr0075307	1.41308	No
FBtr0075308	0.0685643	No
FBtr0075309	-0.186065	No
FBtr0075310	0.22184	No
FBtr0075314	0.568061	No
FBtr0075321	0.350073	No
FBtr0075322	-0.145828	No
FBtr0075324	0.0942441	No
FBtr0075328	0.114777	No
FBtr0075329	-0.306783	No
FBtr0075331	-1.92995	No
FBtr0075338	-0.20593	No
FBtr0075339	-0.89497	No
FBtr0075345	-1.13397	No
FBtr0075346	0.0326498	No
FBtr0075347	0.166865	No
FBtr0075348	1.27707	No
FBtr0075352	0.199137	No
FBtr0075354	-1.4292	No
FBtr0075355	-0.033123	No
FBtr0075358	-0.318061	No
FBtr0075359	-0.377306	No
FBtr0075360	0.0229136	No
FBtr0075361	-0.0888592	No
FBtr0075363	0.207638	No
FBtr0075364	0.394697	No
FBtr0075365	-0.00365966	No
FBtr0075370	1.41308	No
FBtr0075371	1.12562	No
FBtr0075375	0.655156	No
FBtr0075376	0.875844	No
FBtr0075379	0.00085056	No
FBtr0075381	0.282035	No
FBtr0075384	-1.68011	No
FBtr0075386	0.0166932	No
FBtr0075388	-0.420379	No
FBtr0075390	-0.292778	No
FBtr0075391	-1.58455	No
FBtr0075395	-0.0698037	No
FBtr0075398	-0.129444	No
FBtr0075409	1.06517	No
FBtr0075410	-0.494859	No
FBtr0075411	0.0540544	No
FBtr0075412	0.0155486	No
FBtr0075421	-0.320544	No
FBtr0075423	-0.339554	No
FBtr0075424	-0.091525	No
FBtr0075426	0.329766	No
FBtr0075429	0.275603	No
FBtr0075432	0.210756	No
FBtr0075433	-0.809263	No
FBtr0075434	1.04316	No
FBtr0075435	-0.378559	No
FBtr0075453	-0.14689	No
FBtr0075460	-0.242238	No
FBtr0075464	0.0569636	No
FBtr0075465	1.80612	No
FBtr0075468	2.46056	No
FBtr0075470	0.0583609	No
FBtr0075471	-0.0549913	No
FBtr0075475	0.512618	No
FBtr0075477	-0.224402	No
FBtr0075480	-0.294717	No
FBtr0075481	-0.587752	No
FBtr0075482	0.557306	No
FBtr0075483	-0.349583	No
FBtr0075485	-0.0723182	No
FBtr0075491	0.383951	No
FBtr0075492	-0.147418	No
FBtr0075494	-0.351837	No
FBtr0075495	0.367679	No
FBtr0075498	0.108392	No
FBtr0075502	0.512618	No
FBtr0075504	-0.167223	No
FBtr0075506	-0.709087	No
FBtr0075509	-0.094183	No
FBtr0075511	0.238819	No
FBtr0075513	0.769532	No
FBtr0075514	0.00390276	No
FBtr0075515	-1.2947	No
FBtr0075516	-0.126967	No
FBtr0075517	-0.0230628	No
FBtr0075519	-0.173072	No
FBtr0075520	0.0831148	No
FBtr0075522	-0.339306	No
FBtr0075527	-0.180945	No
FBtr0075528	-0.107636	No
FBtr0075535	-2.59586	No
FBtr0075536	0.699611	No
FBtr0075537	0.322217	No
FBtr0075542	-0.392465	No
FBtr0075548	0.428963	No
FBtr0075557	-6.18956	No
FBtr0075563	-0.0786315	No
FBtr0075564	0.409291	No
FBtr0075565	0.0670772	No
FBtr0075570	-0.26696	No
FBtr0075578	-0.532995	No
FBtr0075580	-0.169801	No
FBtr0075590	0.927667	No
FBtr0075591	-0.0974046	No
FBtr0075595	-0.100702	No
FBtr0075596	-0.749446	No
FBtr0075605	0.152915	No
FBtr0075620	-2.35242	No
FBtr0075629	-0.0492962	No
FBtr0075633	-0.455618	No
FBtr0075637	-1.47549	No
FBtr0075640	-0.130442	No
FBtr0075642	-0.177687	No
FBtr0075643	0.604591	No
FBtr0075645	0.350607	No
FBtr0075646	-0.0200096	No
FBtr0075647	-0.154486	No
FBtr0075648	-0.339575	No
FBtr0075655	0.921347	No
FBtr0075659	1.11835	No
FBtr0075672	0.506139	No
FBtr0075678	-0.00653821	No
FBtr0075689	3.31998	No
FBtr0075691	-0.288239	No
FBtr0075700	-0.201916	No
FBtr0075710	1.73501	No
FBtr0075712	0.378789	No
FBtr0075718	-0.0597704	No
FBtr0075720	0.169804	No
FBtr0075722	-0.49787	No
FBtr0075728	-1.01593	No
FBtr0075729	-4.17358	No
FBtr0075736	-1.97277	No
FBtr0075740	-0.835272	No
FBtr0075744	-3.32222	No
FBtr0075746	0.247207	No
FBtr0075749	-0.152768	No
FBtr0075754	-0.282406	No
FBtr0075758	0.044407	No
FBtr0075759	0.0856114	No
FBtr0075762	-0.351391	No
FBtr0075766	-0.0241994	No
FBtr0075769	0.358442	No
FBtr0075774	0.698776	No
FBtr0075777	-0.789132	No
FBtr0075780	0.685373	No
FBtr0075782	-0.451688	No
FBtr0075785	0.189622	No
FBtr0075787	-0.542725	No
FBtr0075791	-0.173571	No
FBtr0075792	-0.577186	No
FBtr0075801	0.0479815	No
FBtr0075811	-0.515543	No
FBtr0075817	-1.43606	No
FBtr0075819	-0.0139108	No
FBtr0075824	-3.6379	No
FBtr0075825	-0.599444	No
FBtr0075838	-0.693797	No
FBtr0075844	1.51265	No
FBtr0075845	-0.0955822	No
FBtr0075850	0.157321	No
FBtr0075851	-0.506892	No
FBtr0075857	0.410397	No
FBtr0075861	0.611666	No
FBtr0075862	0.317783	No
FBtr0075865	0.328277	No
FBtr0075868	-2.65797	No
FBtr0075870	1.44552	No
FBtr0075873	1.99882	No
FBtr0075875	0.260484	No
FBtr0075876	-3.0019	No
FBtr0075878	-0.605163	No
FBtr0075884	-1.3134	No
FBtr0075886	-0.163274	No
FBtr0075895	-0.936317	No
FBtr0075899	-0.791844	No
FBtr0075915	0.158304	No
FBtr0075918	0.0721385	No
FBtr0075921	0.242271	No
FBtr0075931	1.78527	No
FBtr0075936	-7.01728	No
FBtr0075939	-1.5709	No
FBtr0075944	-0.291864	No
FBtr0075951	0.149459	No
FBtr0075952	-0.161253	No
FBtr0075953	-0.0328535	No
FBtr0075954	0.570835	No
FBtr0075955	0.0814136	No
FBtr0075960	0.625539	No
FBtr0075961	-0.12901	No
FBtr0075965	-0.0638123	No
FBtr0075966	-0.0491284	No
FBtr0075967	-0.911538	No
FBtr0075968	-0.186998	No
FBtr0075969	0.0589054	No
FBtr0075972	-0.0922055	No
FBtr0075975	-0.334733	No
FBtr0075981	-0.0439121	No
FBtr0075985	-0.268709	No
FBtr0075986	-0.439706	No
FBtr0075991	-0.310726	No
FBtr0075992	0.260722	No
FBtr0075995	0.0971654	No
FBtr0076001	0.499374	No
FBtr0076003	0.444895	No
FBtr0076005	0.954966	No
FBtr0076006	0.0931656	No
FBtr0076011	-0.962966	No
FBtr0076016	0.0255103	No
FBtr0076018	0.246183	No
FBtr0076019	0.138624	No
FBtr0076022	-0.68604	No
FBtr0076023	-0.269454	No
FBtr0076024	-0.212917	No
FBtr0076027	-0.0366011	No
FBtr0076029	-0.418839	No
FBtr0076030	-0.0356434	No
FBtr0076031	0.475496	No
FBtr0076032	1.63885	No
FBtr0076049	-0.00504292	No
FBtr0076053	-0.0191003	No
FBtr0076062	-0.228563	No
FBtr0076063	-1.79299	No
FBtr0076064	0.221421	No
FBtr0076067	-0.852781	No
FBtr0076075	-0.0723128	No
FBtr0076084	0.283124	No
FBtr0076087	0.179722	No
FBtr0076094	7.24049	No
FBtr0076102	-0.399424	No
FBtr0076119	-1.83054	No
FBtr0076123	0.21182	No
FBtr0076124	-0.0269668	No
FBtr0076130	0.0926811	No
FBtr0076133	-0.37347	No
FBtr0076134	-0.219693	No
FBtr0076136	0.174824	No
FBtr0076137	-0.236821	No
FBtr0076138	0.259065	No
FBtr0076144	2.68249	No
FBtr0076150	-0.487317	No
FBtr0076156	-2.92997	No
FBtr0076161	-0.339824	No
FBtr0076163	0.822838	No
FBtr0076164	0.605343	No
FBtr0076171	0.75363	No
FBtr0076173	-0.393557	No
FBtr0076177	1.51259	No
FBtr0076185	0.623061	No
FBtr0076187	-0.35952	No
FBtr0076193	-0.115369	No
FBtr0076201	1.1827	No
FBtr0076202	0.314223	No
FBtr0076205	-0.220522	No
FBtr0076208	-0.826601	No
FBtr0076214	3.21827	No
FBtr0076216	-0.752269	No
FBtr0076217	-0.659797	No
FBtr0076218	0.309044	No
FBtr0076221	-1.07235	No
FBtr0076223	-0.204614	No
FBtr0076234	-0.0110759	No
FBtr0076235	-1.78784	No
FBtr0076238	0.205316	No
FBtr0076239	-0.0257816	No
FBtr0076240	-0.0807214	No
FBtr0076250	-0.399942	No
FBtr0076253	-0.157781	No
FBtr0076256	-2.83159	No
FBtr0076259	0.200153	No
FBtr0076260	0.120824	No
FBtr0076265	-0.156824	No
FBtr0076270	0.0830403	No
FBtr0076271	0.462263	No
FBtr0076273	-0.0587134	No
FBtr0076274	-0.0953359	No
FBtr0076276	-0.0400124	No
FBtr0076286	1.24958	No
FBtr0076288	0.583024	No
FBtr0076292	-0.165423	No
FBtr0076301	-0.560395	No
FBtr0076304	-1.48732	No
FBtr0076308	-0.351847	No
FBtr0076314	-2.08198	No
FBtr0076315	-2.65723	No
FBtr0076316	-4.6572	No
FBtr0076328	-4.03691	No
FBtr0076329	-0.474961	No
FBtr0076339	-0.458744	No
FBtr0076343	0.270668	No
FBtr0076347	0.331208	No
FBtr0076348	-0.330735	No
FBtr0076354	-0.348059	No
FBtr0076355	0.291452	No
FBtr0076356	0.458696	No
FBtr0076359	-1.02167	No
FBtr0076361	-0.513169	No
FBtr0076363	0.106509	No
FBtr0076366	0.284424	No
FBtr0076369	0.553223	No
FBtr0076371	-0.048976	No
FBtr0076372	-3.92993	No
FBtr0076373	0.260287	No
FBtr0076379	-0.344967	No
FBtr0076380	-1.1343	No
FBtr0076384	0.691958	No
FBtr0076387	-0.995079	No
FBtr0076388	-1.34587	No
FBtr0076389	-1.80847	No
FBtr0076393	-1.66915	No
FBtr0076395	0.102222	No
FBtr0076402	-0.809277	No
FBtr0076405	0.0583366	No
FBtr0076410	0.82111	No
FBtr0076412	-0.42075	No
FBtr0076414	-3.05547	No
FBtr0076421	-1.88806	No
FBtr0076423	2.22129	No
FBtr0076426	0.0604509	No
FBtr0076427	-0.199719	No
FBtr0076435	0.160439	No
FBtr0076439	-0.0325243	No
FBtr0076440	-0.394243	No
FBtr0076441	-0.542227	No
FBtr0076444	0.0320979	No
FBtr0076452	-0.440529	No
FBtr0076453	-1.36366	No
FBtr0076454	-1.55581	No
FBtr0076455	0.241124	No
FBtr0076457	0.474466	No
FBtr0076458	-0.0671026	No
FBtr0076462	-0.628522	No
FBtr0076463	-0.51055	No
FBtr0076471	-0.0495138	No
FBtr0076472	-0.0824241	No
FBtr0076473	-0.573701	No
FBtr0076476	-0.236792	No
FBtr0076479	-1.07993	No
FBtr0076481	-0.29116	No
FBtr0076485	0.628125	No
FBtr0076486	0.0973039	No
FBtr0076487	0.405982	No
FBtr0076495	-0.474866	No
FBtr0076496	-1.22194	No
FBtr0076497	-0.215253	No
FBtr0076498	-0.270305	No
FBtr0076499	0.444275	No
FBtr0076501	-0.276716	No
FBtr0076504	0.0698195	No
FBtr0076506	0.168649	No
FBtr0076510	-0.493928	No
FBtr0076511	-0.538215	No
FBtr0076512	0.871094	No
FBtr0076515	-0.212134	No
FBtr0076517	0.0405332	No
FBtr0076518	-1.25288	No
FBtr0076519	-0.185904	No
FBtr0076522	-1.37959	No
FBtr0076523	-0.44553	No
FBtr0076529	0.00160798	No
FBtr0076531	0.139498	No
FBtr0076537	-0.761554	No
FBtr0076542	-0.495917	No
FBtr0076543	-0.209961	No
FBtr0076547	0.235802	No
FBtr0076548	-0.894157	No
FBtr0076552	-0.487356	No
FBtr0076557	-0.925827	No
FBtr0076559	2.15802	No
FBtr0076560	-0.717812	No
FBtr0076568	0.150064	No
FBtr0076569	-0.245937	No
FBtr0076570	-0.246897	No
FBtr0076571	3.23251	No
FBtr0076572	6.39321	No
FBtr0076573	4.10957	No
FBtr0076574	2.56705	No
FBtr0076580	-2.84347	No
FBtr0076582	-1.19897	No
FBtr0076584	1.96331	No
FBtr0076585	-0.170608	No
FBtr0076588	-2.99914	No
FBtr0076589	-4.73517	No
FBtr0076591	-4.9041	No
FBtr0076592	-0.386948	No
FBtr0076593	0.0219916	No
FBtr0076597	-0.470891	No
FBtr0076599	-0.41283	No
FBtr0076603	0.674204	No
FBtr0076604	0.385945	No
FBtr0076610	-0.6198	No
FBtr0076612	-1.07691	No
FBtr0076620	-0.735887	No
FBtr0076622	-0.122953	No
FBtr0076623	0.159648	No
FBtr0076626	0.0330083	No
FBtr0076633	-0.945217	No
FBtr0076638	1.17733	No
FBtr0076639	0.249591	No
FBtr0076647	1.40489	No
FBtr0076648	0.176128	No
FBtr0076649	-0.0878922	No
FBtr0076650	0.64219	No
FBtr0076651	-0.736299	No
FBtr0076652	1.06724	No
FBtr0076654	-0.564626	No
FBtr0076655	0.595215	No
FBtr0076659	0.811584	No
FBtr0076663	-2.34912	No
FBtr0076664	-0.423795	No
FBtr0076674	-0.992022	No
FBtr0076677	-0.131114	No
FBtr0076683	-0.072343	No
FBtr0076684	-0.232613	No
FBtr0076685	-0.345027	No
FBtr0076687	0.00773879	No
FBtr0076688	0.232919	No
FBtr0076689	-1.12604	No
FBtr0076694	0.174542	No
FBtr0076695	0.115015	No
FBtr0076697	2.32005	No
FBtr0076699	-0.359114	No
FBtr0076700	0.391939	No
FBtr0076701	-2.08143	No
FBtr0076705	0.423192	No
FBtr0076706	0.183828	No
FBtr0076707	0.353703	No
FBtr0076708	0.500851	No
FBtr0076711	0.0822395	No
FBtr0076715	0.134315	No
FBtr0076718	-1.345	No
FBtr0076720	0.826663	No
FBtr0076722	-0.0214906	No
FBtr0076725	-0.484167	No
FBtr0076728	0.230567	No
FBtr0076729	0.145928	No
FBtr0076732	-0.173438	No
FBtr0076734	0.00799129	No
FBtr0076735	0.0466884	No
FBtr0076736	0.11651	No
FBtr0076737	-0.0196834	No
FBtr0076738	-0.139436	No
FBtr0076746	-0.252885	No
FBtr0076748	0.11471	No
FBtr0076749	-0.259447	No
FBtr0076750	-0.538871	No
FBtr0076751	-1.37632	No
FBtr0076752	0.249581	No
FBtr0076753	-0.22969	No
FBtr0076763	-0.344444	No
FBtr0076764	0.247905	No
FBtr0076766	0.0168029	No
[truncated: 8,546 more rows]
