# Supplementary material for: Upstream open reading frames buffer translational variability during Drosophila evolution and development
Source: eLife. 2025 Jun 6;14:RP104074. doi: 10.7554/eLife.104074 (PMC12143884; doi:10.7554/eLife.104074)
Supplement: Figure 4—source data 1. [file elife-104074-fig4-data1.xlsx]

## Sheet: fig4
Transcript_id	dmel_em02_TE	dsim_em02_TE	dmel_em26_TE	dsim_em26_TE	dmel_em612_TE	dsim_em612_TE	dmel_em1224_TE	dsim_em1224_TE	dmel_larva_TE	dsim_larva_TE	dmel_pupa_TE	dsim_pupa_TE	dmel_fem_TE	dsim_fem_TE	dmel_mal_TE	dsim_mal_TE	dmel_FH_TE	dsim_FH_TE	dmel_MH_TE	dsim_MH_TE	dmel_TE_cv10	dsim_TE_cv10	dmel_TE_cv6	dsim_TE_cv6	dmel_TE_cv4	dsim_TE_cv4	translated_uorf_num_dm6_em02	translated_uorf_num_dsim_em02	translated_uorf_num_both_em02	translated_uorf_num_dm6_or_dsim_em02	translated_uorf_num_dm6_em26	translated_uorf_num_dsim_em26	translated_uorf_num_both_em26	translated_uorf_num_dm6_or_dsim_em26	translated_uorf_num_dm6_em612	translated_uorf_num_dsim_em612	translated_uorf_num_both_em612	translated_uorf_num_dm6_or_dsim_em612	translated_uorf_num_dm6_em1224	translated_uorf_num_dsim_em1224	translated_uorf_num_both_em1224	translated_uorf_num_dm6_or_dsim_em1224	translated_uorf_num_dm6_larva	translated_uorf_num_dsim_larva	translated_uorf_num_both_larva	translated_uorf_num_dm6_or_dsim_larva	translated_uorf_num_dm6_pupa	translated_uorf_num_dsim_pupa	translated_uorf_num_both_pupa
FBtr0006151	1.23359	2.61943	1.68027	1.39186	0.870306	2.37814	1.4142	1.91715	2.68575	1.97764	0.359674	0.317978	1.74525	0.381103	1.20535	0.228067	1.06446	0.569442	1.64034	0.736974	0.445376	0.731057	0.574782	0.46718	0.261581	0.260789	0	0	0	1	1	0	0	1	1	0	0	1	0	3	0	4	4	0	0	4	1	0	0
FBtr0070000	0.434872	2.3487	0.531712	0.253579	1.0167	1.05756	1.53966	1.1465	1.03504	0.851759	0.893633	0.726631	1.10014	0.809676	0.89932	0.458296	1.44779	0.796201	1.39673	0.709813	0.356442	0.617887	0.438195	0.660892	0.576451	0.718868	0	0	0	0	0	0	0	0	0	0	0	0	2	0	0	2	1	0	0	1	0	0	0
FBtr0070002	1	0.0982066	0.235134	1	1	1	0.227537	1	0.028076	0.00507893	0.00922096	0.00193371	0.700551	1.21709	0.390638	0.467627	0.444309	0.0814049	1	8.29364	0.786917	1.89761	1.10833	1.02339	0.720843	0.582139	0	0	0	0	0	0	0	0	0	0	0	0	0	0	0	0	0	0	0	0	0	0	0
FBtr0070003	1	1	1	0.0368755	0.195104	1	0.213111	1	0.104827	1	1	1	1	1	0.200436	0.149675	0.154455	0.0729234	1	1	0.743971	0.609	0.778018	0.468378	0.763333	0.634286	0	0	0	0	0	0	0	0	0	0	0	0	0	0	0	0	0	0	0	0	0	0	0
FBtr0070006	2.12712	6.10858	0.248077	0.0449037	0.342117	1.01906	1.07811	0.868778	0.964465	4.88206	0.612897	4.40157	3.4448	1.6499	0.831435	0.945727	0.532217	0.401814	0.528894	0.420367	0.924395	1.05679	0.767264	0.880129	0.915587	1.37566	0	0	0	0	0	0	0	0	0	0	0	0	0	0	0	0	0	0	0	0	0	0	0
FBtr0070007	1.13232	0.491256	0.883863	0.531919	1.58491	1.68528	1.62942	1.87969	1.17972	0.587363	1.01973	0.850625	2.49936	1.62062	1.51988	1.39157	1.65177	1.43982	1.85275	1.60295	0.316687	0.44287	0.245251	0.616002	0.275995	0.64359	0	0	0	0	0	0	0	0	0	0	0	0	0	0	0	0	0	0	0	0	0	0	0
FBtr0070008	0.39679	0.148129	0.903547	0.487815	1.1272	1.39467	1.11766	0.867052	0.749502	0.660765	0.724043	0.545348	0.855042	0.65987	0.611461	1.10001	1.22447	1.02807	1.03425	0.960391	0.297217	0.455233	0.330281	0.614755	0.386197	0.738096	0	0	0	0	0	0	0	0	0	0	0	0	0	0	0	0	0	0	0	0	0	0	0
FBtr0070026	0.804405	0.555558	0.739971	0.488272	0.558436	0.674925	0.766859	0.581249	0.586096	0.50209	0.416899	0.381711	0.991491	1.08161	0.443091	0.605728	0.563947	0.533955	0.652271	0.537987	0.269986	0.316049	0.232161	0.18616	0.152257	0.134427	1	1	1	2	2	1	1	2	1	0	0	1	2	1	1	2	1	1	1	2	2	1	1
FBtr0070027	0.150028	0.0485411	0.379404	0.246541	0.831227	0.545039	0.800092	0.392095	0.689456	0.774554	0.628901	0.552602	0.18554	0.254974	0.85454	1.65807	0.292937	0.0997559	0.759221	0.951458	0.497456	0.874013	0.456959	0.599997	0.614283	0.686974	0	0	0	0	0	0	0	0	0	0	0	0	0	0	0	0	0	0	0	0	0	0	0
FBtr0070028	1.93571	0.566734	1.65123	0.679207	0.94401	0.321949	0.904947	0.237067	1.02255	0.621088	1.09413	0.778577	0.538753	0.321606	0.670535	0.543974	1.02435	0.647994	1.02845	0.692244	0.387127	0.340496	0.340669	0.395133	0.379128	0.45757	3	4	3	4	4	3	3	4	1	2	1	2	3	3	2	4	4	3	3	4	4	3	3
FBtr0070029	1	1	1	0.0368755	0.195104	1	1	1	1	1	0.307424	1	1	1	1	0.149675	1	0.0729234	1	1	0.372598	0.609	0.517407	0.468378	0.503831	0.634286	0	0	0	0	0	0	0	0	0	0	0	0	0	0	0	0	0	0	0	0	0	0	0
FBtr0070032	3.92957	1.65889	5.77639	2.2931	0.245916	0.137117	1.88291	0.018897	0.239595	1	1.13823	0.118588	0.92212	12.8638	1	0.0562326	1	0.0962538	1	1	1.03411	2.03864	1.00873	1.08792	0.813944	1.09738	0	0	0	0	0	0	0	0	0	0	0	0	0	0	0	0	0	0	0	0	0	0	0
FBtr0070035	0.297937	1	0.295578	1	1	1	0.0628006	1	0.0495849	0.126361	0.0867232	0.0664079	0.101476	1.20004	0.217211	0.339937	0.0634903	1	1	61.4337	1.17087	2.81589	1.21094	0.668308	0.980215	0	0	0	0	0	0	0	0	0	0	0	0	0	0	0	0	0	0	0	0	0	0	0	0
FBtr0070036	1.88826	36.4729	0.581579	0.528009	1.4974	2.6577	1.79235	2.16981	2.2427	1.52082	1.21204	4.76906	2.92463	2.54983	1.5724	1.86994	1.1864	1.76218	0.917382	1.42877	0.427835	1.95833	0.380423	1.74702	0.413845	1.66086	0	0	0	0	0	0	0	0	0	0	0	0	0	0	0	0	0	0	0	0	0	0	0
FBtr0070038	3.45867	6.23458	2.34683	4.39704	2.65431	2.70625	1.53275	1.57836	2.826	1.72311	2.26911	1.9097	1.5807	2.03552	2.86877	1.95986	2.65054	2.77522	1.72463	2.04665	0.262577	0.539508	0.255269	0.601519	0.318723	0.545095	0	0	0	0	0	0	0	0	0	0	0	0	0	0	0	0	0	0	0	0	0	0	0
FBtr0070040	6.84654	11.5744	10.1294	7.93532	6.72665	7.59341	4.29731	7.966	9.86558	4.29743	4.73257	3.46399	6.31012	2.62331	6.23092	3.65022	8.49576	7.54416	7.23107	6.11398	0.273593	0.441526	0.347816	0.409752	0.342025	0.214322	1	1	0	2	1	1	0	2	1	1	0	2	1	1	0	2	1	1	0	2	1	1	0
FBtr0070042	2.1271	2.17808	2.97823	4.37918	5.06208	5.61893	3.20884	4.48277	4.77529	2.19963	3.69233	2.2746	2.29954	1.87837	3.5741	2.10303	3.62474	4.60159	2.62491	2.9258	0.285545	0.417774	0.306523	0.424272	0.369675	0.345421	0	0	0	0	0	0	0	1	0	0	0	1	0	0	0	1	0	0	0	1	0	0	0
FBtr0070045	4.34975	7.37132	6.27542	5.75709	3.35022	3.38556	2.45222	2.8163	4.49744	2.15726	3.57566	2.26725	1.4496	1.99499	2.23839	2.00026	3.04798	4.88316	2.9833	2.4699	0.39869	0.53187	0.319363	0.537231	0.399406	0.438299	2	1	1	2	2	1	1	2	2	1	1	2	2	1	1	2	2	1	1	2	2	1	1
FBtr0070046	3.23143	4.04263	4.10221	3.22718	1.58472	1.13771	1.03572	1.52818	3.66941	1.16091	2.70548	1.21365	0.39835	1.28399	2.76672	2.17058	2.19824	5.32369	1.71891	2.46946	0.501994	0.608758	0.440913	0.614619	0.572231	0.555306	0	2	0	2	1	2	0	3	1	2	0	3	1	2	0	3	0	2	0	2	1	2	0
FBtr0070050	0.470075	1	0.149239	1	1	1	1	1	0.420879	1	0.407832	1	1	1	1	1	0.220831	1	1	1	0.544824	0	0.605419	0	0.640687	0	0	0	0	0	0	0	0	0	0	0	0	0	0	0	0	0	0	0	0	0	0	0	0
FBtr0070052	1	1	1	1	1	1	1	1	0.255318	1	0.245229	1	1	1	1	1	1	1	1	1	0.371883	0	0.516164	0	0	0	0	0	0	0	0	0	0	0	0	0	0	0	0	0	0	0	0	0	0	0	0	0	0
FBtr0070053	0.470075	1	0.149239	1	1	1	1	1	0.420879	1	0.407832	1	1	1	1	1	0.220831	1	1	1	0.544824	0	0.605419	0	0.640687	0	0	0	0	0	0	0	0	0	0	0	0	0	0	0	0	0	0	0	0	0	0	0	0
FBtr0070055	1	0.153854	1	0.241893	1	1.50718	1	1.11243	0.255318	0.656672	0.245229	0.266302	1	1.15262	1	1.19301	1	1.14786	1	0.911622	0.371883	0.569579	0.516164	0.836764	0	0.879322	0	0	0	0	0	0	0	0	0	0	0	0	0	0	0	0	0	0	0	0	0	0	0
FBtr0070057	0.307253	1	0.111347	1	0.376185	1	0.360623	1	0.232403	1	0.0523575	1	1	1	0.0627134	1	0.124121	1	0.0722215	1	1.05591	0	0.557205	0	0.422233	0	0	0	0	0	0	0	0	0	0	0	0	0	0	0	0	0	0	0	0	0	0	0	0
FBtr0070058	1.28632	1.35818	0.818465	0.899432	0.81649	0.831314	0.988677	1.01475	0.678968	1.00627	0.844326	0.922163	0.65063	1.07597	0.69201	0.709941	0.981633	1.05862	0.910064	1.053	0.218852	0.174056	0.232956	0.185025	0.226237	0.228176	0	1	0	2	0	1	0	2	0	1	0	1	0	1	0	2	0	1	0	2	0	1	0
FBtr0070064	1.84814	2.0686	1.47271	2.31054	1.20114	1.09326	0.621125	1.15004	1.11524	0.828195	1.26994	0.802401	0.835317	1.07608	1.46889	0.926103	1.33189	1.83694	1.06854	1.56236	0.282675	0.397519	0.323477	0.472628	0.401652	0.377416	0	0	0	0	0	0	0	1	0	0	0	0	0	0	0	0	0	0	0	0	0	0	0
FBtr0070066	0.560029	3.64436	1.00473	1.4861	2.19515	2.66476	2.44544	2.28174	2.78348	2.46619	1.47729	8.20918	4.58563	1.88673	2.43533	2.10966	3.16078	3.12466	5.58996	3.13803	0.587796	0.614845	0.499478	0.702201	0.587899	0.355841	1	0	0	1	1	1	1	1	0	1	0	1	1	1	1	1	1	1	1	1	1	1	1
FBtr0070069	0.22409	0.0322298	0.222131	0.896979	0.702489	0.749372	1.57482	0.377046	0.0454505	0.0221164	0.0221103	0.020982	0.701923	0.8157	0.483128	0.402525	1.03993	0.43472	0.44574	1.84965	0.884146	0.997629	1.28166	1.12638	0.936085	0.756086	0	0	0	0	0	1	0	1	0	1	0	1	0	2	0	2	1	1	0	2	0	0	0
FBtr0070070	0.224534	1.42822	1	23.7628	0.0517374	1.08442	0.528648	0.255429	0.477006	0.123039	0.0169986	0.2743	0.400584	0.442564	1.42	0.637276	0.391367	0.210111	0.0107723	0.308563	1.00161	2.57972	0.962166	2.10719	0.921001	1.72338	0	0	0	0	0	0	0	0	0	0	0	0	0	0	0	0	0	0	0	0	0	0	0
FBtr0070071	0.981742	1.22884	0.76012	0.631472	1.08844	2.56753	0.536269	3.77284	1.70073	0.473142	1.21592	5.59837	0.8413	2.02643	0.437372	2.31148	0.342741	2.22963	0.325586	10.5165	0.533285	0.956732	0.383167	0.848156	0.29139	0.685336	0	0	0	0	0	0	0	0	0	0	0	0	0	0	0	0	0	0	0	0	0	0	0
FBtr0070072	2.3824	14.5041	4.76767	4.24734	7.44717	3.91626	10.538	0.219082	2.09547	1.38112	1.72195	2.21283	3.48602	1	1	1	18.527	1	1	1	1.05146	1.39058	0.733054	1.17178	0.55866	1.07189	0	0	0	0	0	0	0	0	0	0	0	0	0	0	0	0	0	0	0	0	0	0	0
FBtr0070073	5.16215	6.91477	4.19906	2.85512	5.81283	2.69066	1.70118	0.381058	1.62816	1.9585	2.97435	3.7217	1.63061	5.47542	2.01913	0.580713	3.55814	0.127661	0.629943	0.135235	0.583269	0.945834	0.493104	0.707666	0.427749	0.845883	0	0	0	0	0	0	0	0	0	0	0	0	0	0	0	0	0	0	0	0	0	0	0
FBtr0070074	2.14799	6.52987	2.06325	2.38827	4.96118	2.7351	2.4971	0.74675	1.19859	3.48283	2.25594	2.52682	2.99514	4.68834	0.336194	0.0586571	5.68193	0.100221	1	1	0.668642	0.858736	0.50565	0.625396	0.471454	0.788874	0	0	0	0	0	0	0	0	0	0	0	0	0	0	0	0	0	0	0	0	0	0	0
FBtr0070075	0.434523	5.14766	0.738586	1.80828	2.72349	2.33612	1.75599	0.52857	1.13815	1.85625	1.10761	1.89096	3.3162	1.2112	0.239337	0.103563	2.22043	0.171161	1	0.18078	0.689316	0.999255	0.622738	0.680662	0.736227	0.793774	0	1	0	1	0	1	0	1	0	1	0	1	0	1	0	1	0	1	0	1	0	1	0
FBtr0070077	0.654995	1.98708	1.23665	0.846748	0.564038	0.956228	0.305161	1.92163	1.00788	0.745629	0.629413	0.888654	0.734339	0.479691	0.315076	0.441798	2.14206	0.789706	1.09557	0.896684	0.626604	0.536145	0.455588	0.465533	0.569806	0.427264	0	0	0	0	0	0	0	0	0	0	0	0	0	0	0	0	0	0	0	0	0	0	0
FBtr0070078	1.79365	2.05652	2.02153	1.0223	0.714325	0.968074	0.883822	1.60611	0.489358	0.639155	0.950921	0.785565	0.358671	0.47967	0.727586	0.48371	1.64164	0.734915	4.33233	0.77423	0.847058	0.529288	0.541115	0.459299	0.480605	0.365856	0	0	0	0	0	0	0	0	0	0	0	0	0	0	0	0	0	0	0	0	0	0	0
FBtr0070079	0.571621	0.331455	0.641825	0.762183	1.17695	0.758859	1.15002	0.975439	0.69759	0.526082	0.442264	0.351312	0.76616	0.681592	0.534297	0.47435	1.05626	0.67371	1.29243	0.536379	0.368802	0.330938	0.396318	0.416047	0.364827	0.382016	0	0	0	0	1	0	0	1	0	0	0	0	1	0	0	1	0	0	0	0	0	0	0
FBtr0070080	0.121197	0.110205	0.035957	0.231124	0.243558	0.854457	0.278186	0.335893	0.140164	0.157112	0.132756	0.17671	0.0103129	0.0908151	0.127503	0.00370515	0.132248	0.157606	0.132487	0.111753	0.59239	1.07088	0.556492	0.891765	0.658418	0.855543	0	1	0	1	0	0	0	0	1	1	1	1	1	2	1	2	0	1	0	1	1	2	1
FBtr0070087	2.0556	2.58941	1.12449	1.3546	1.39711	1.08773	1.24785	1.33508	2.05222	1.97908	1.84688	1.86926	1.0061	1.22769	2.43937	0.953865	1.90199	1.29397	1.95602	1.07377	0.279184	0.346977	0.256153	0.324371	0.284846	0.424789	0	0	0	0	0	0	0	0	0	0	0	0	0	0	0	0	0	0	0	0	0	0	0
FBtr0070088	0.377265	9.41649	0.312585	0.602949	0.718215	1.08208	0.931434	1.12841	2.50541	2.05867	0.54904	0.604681	1.12748	0.733523	0.880598	0.676174	0.935366	0.968502	1.82225	0.833315	0.666147	1.49496	0.910891	1.38522	0.498602	1.38872	0	0	0	0	0	0	0	0	0	0	0	0	0	0	0	0	0	0	0	0	0	0	0
FBtr0070089	0.537617	0.433672	0.866638	0.557726	1.0689	0.587614	0.877111	0.375039	0.529172	0.452304	0.7684	0.508891	0.857449	0.48008	0.634066	0.484904	1.03361	0.806692	0.90791	0.531437	0.234175	0.22519	0.272032	0.165114	0.263294	0.206386	0	0	0	0	0	0	0	0	0	0	0	0	0	0	0	0	0	0	0	0	0	0	0
FBtr0070091	0.955667	16.8812	2.222	3.21767	5.81652	4.76771	5.81522	2.0673	2.43066	5.5685	4.89203	6.40275	3.82171	9.96809	2.35689	1.27346	1.67655	1.28586	1.21112	1.21565	0.589514	0.941795	0.564786	0.82207	0.673797	1.01806	1	1	1	1	1	1	1	1	1	1	1	1	1	1	1	1	1	1	1	1	1	1	1
FBtr0070092	0.562203	0.338286	0.517763	0.261268	1.13508	1.86222	1.38091	1.6695	0.804799	1.4503	0.509404	0.511999	0.70909	0.781051	0.926809	0.921682	0.983335	1.08178	1.25799	1.02519	0.355061	0.550672	0.446772	0.712041	0.474874	0.823643	0	0	0	0	0	0	0	0	0	0	0	0	0	0	0	0	0	0	0	0	0	0	0
FBtr0070094	0.767332	0.318532	0.587849	0.692601	1.19552	1.06967	0.969047	0.939906	0.627995	0.654743	0.55622	0.474188	0.46302	0.475985	0.473956	0.487788	0.667044	0.559074	0.458575	0.594388	0.35594	0.362825	0.32196	0.405061	0.297457	0.437589	0	0	0	0	0	0	0	0	0	0	0	0	0	0	0	0	0	0	0	0	0	0	0
FBtr0070099	0.476699	1.00206	0.979566	0.40977	1.50696	1.60543	2.50633	2.09847	3.21052	3.35999	2.06029	2.65491	2.64643	6.17685	2.57455	2.34682	3.2421	0.55294	5.13133	69.8179	0.540104	2.38083	0.562301	0.582707	0.634805	0.572864	0	0	0	0	0	0	0	0	0	0	0	0	0	0	0	0	0	0	0	0	0	0	0
FBtr0070100	0.607455	23.2972	1.09486	0.650516	1.6798	1.76792	1.55223	3.46603	3.19257	279.266	0.0721792	0.973379	1.09601	1.43998	1.07074	1.59258	2.81043	0.625947	63.3267	3.66157	2.56007	2.75505	0.787642	2.16958	0.394899	1.47085	0	0	0	0	0	0	0	0	0	0	0	0	0	0	0	0	0	0	0	0	0	0	0
FBtr0070101	2.4992	0.746131	3.51355	1.77494	1.18466	0.455572	2.55846	1.47209	2.42153	2.10323	3.76371	5.3865	1.82196	0.623943	2.27048	1.08968	2.49718	3.38832	2.41755	3.28014	0.295242	0.770173	0.345633	0.892417	0.392264	0.552781	0	0	0	0	1	0	0	1	0	0	0	0	1	1	1	1	0	1	0	1	1	1	1
FBtr0070103	2.73351	0.717764	1.34509	0.629015	1.24732	0.513655	1.84385	4.17418	0.796956	0.994025	0.529261	0.831489	0.427371	0.546245	0.490664	0.599964	1.66959	1.88699	2.92574	1.38367	0.642732	0.914273	0.558036	1.07851	0.379144	1.17919	3	2	2	3	1	2	1	2	3	1	1	3	3	3	3	3	1	2	1	2	0	1	0
FBtr0070106	0.173642	1.54536	0.943071	0.629113	0.899802	1.06793	0.982841	1.36827	0.573933	1.42791	0.600885	0.392165	1.82643	1.39515	0.790192	0.621835	1.07459	1.0092	0.868453	0.655041	0.486792	0.409707	0.446135	0.436999	0.514277	0.347737	0	0	0	0	0	1	0	1	0	1	0	1	0	1	0	1	0	1	0	1	0	1	0
FBtr0070108	0.464636	0.751939	0.922373	0.88504	0.977888	0.894187	0.615971	1.01524	0.415346	0.374892	0.578121	0.337047	0.266477	0.258443	0.391835	0.340297	0.873209	0.629816	0.774955	0.452011	0.394239	0.466107	0.355032	0.403912	0.329562	0.121379	0	1	0	1	0	1	0	1	0	1	0	1	0	1	0	1	0	0	0	0	0	0	0
FBtr0070110	0.399999	1.79064	0.813427	0.981418	1.29673	0.812188	1.8282	0.923515	1.61058	3.47056	1.75713	1.67189	8.15509	4.25311	2.64524	2.33382	0.603758	0.26954	0.34288	2.16802	1.18308	0.666822	0.444518	0.62181	0.568403	0.397541	0	1	0	1	1	2	1	2	1	2	1	2	0	1	0	1	0	0	0	0	1	0	0
FBtr0070115	0.240933	0.165603	0.380224	0.127353	0.277517	0.161334	0.381177	0.300361	0.0949237	0.186776	0.151428	0.151761	0.380826	0.20177	0.264304	0.208218	0.233111	0.193009	0.366362	0.209494	0.366047	0.246439	0.460673	0.335012	0.224112	0.404991	0	0	0	0	0	0	0	0	0	0	0	0	0	0	0	0	0	0	0	0	0	0	0
FBtr0070116	1.86251	1.76751	1.57224	1.06686	0.795415	0.302919	0.362367	0.199236	0.505447	0.502674	0.755324	0.404289	0.427389	0.425435	0.834595	0.634346	0.792229	0.659031	0.907306	0.606378	0.546791	0.695888	0.61856	0.850398	0.601762	0.878423	0	1	0	1	0	1	0	1	0	1	0	1	0	1	0	1	0	1	0	1	0	0	0
FBtr0070119	1.68959	2.10745	0.953157	1.52855	1.55211	0.823782	0.957815	0.827744	1.65789	1.64813	1.4305	1.21748	1.00971	1.1256	1.11653	1.49747	1.81203	1.3732	1.52619	1.86755	0.240684	0.298492	0.244832	0.369608	0.301382	0.468806	0	0	0	0	0	0	0	0	0	0	0	0	0	0	0	0	0	0	0	0	0	0	0
FBtr0070120	2.42468	4.97051	0.989646	3.39614	0.720234	0.693839	0.604768	1.45878	0.788106	0.563838	0.620767	0.250316	0.751613	1.14509	1.01973	8.72924	0.58129	6.47622	0.506816	0.318426	0.623098	1.06716	0.683036	0.999502	0.710775	0.734244	4	4	4	4	4	0	0	4	4	1	1	4	4	0	0	4	4	0	0	4	4	0	0
FBtr0070121	0.0476795	0.168407	0.602106	0.788353	1.12369	1.10626	0.856622	0.913472	0.673357	0.648263	0.748943	0.579486	1.19919	0.666548	0.668981	0.528534	0.792901	0.87467	0.728915	0.779048	0.420702	0.361541	0.529147	0.459443	0.698012	0.544901	0	1	0	1	0	1	0	1	0	1	0	1	0	1	0	1	0	1	0	1	0	1	0
FBtr0070123	3.96613	3.11329	3.01389	2.10339	2.3325	1.51431	1.56988	1.03798	1.8602	1.40003	1.97728	1.57024	2.25177	1.38467	3.08636	1.54327	2.82985	2.55482	2.61674	1.99615	0.276993	0.343947	0.363497	0.40989	0.374372	0.460335	1	1	1	1	1	1	1	1	1	1	1	1	1	1	1	1	1	1	1	1	1	1	1
FBtr0070134	0.179599	0.749763	0.702416	0.699865	1.46749	1.86645	1.05482	1.4248	0.701699	1.27817	0.227147	0.511711	1.14073	0.800577	0.460744	0.681878	0.941285	0.900708	0.992859	1.07623	0.52387	0.416254	0.680152	0.477872	0.641577	0.473958	0	0	0	0	0	0	0	0	0	0	0	0	0	0	0	0	0	0	0	0	0	0	0
FBtr0070135	0.215338	0.109962	0.666346	0.404592	0.715652	0.783066	1.09973	0.850736	1.14414	1.78321	1.04006	2.18306	2.37	2.5491	1.20235	0.924391	1.22567	1.08445	0.866522	1.05011	0.528622	0.65754	0.436874	0.788293	0.537069	0.643967	0	0	0	0	0	0	0	0	0	0	0	0	0	0	0	0	0	0	0	0	0	0	0
FBtr0070139	0.180267	2.91733	0.518243	0.703412	0.676685	1.48398	1.01945	0.725811	0.426516	0.601773	0.936198	1.28271	0.835182	0.5513	0.464816	0.611993	0.568627	0.909009	0.500634	0.968981	0.418139	0.665805	0.506827	0.679931	0.582384	0.712497	1	0	0	1	1	0	0	1	1	1	1	1	1	1	1	1	1	1	1	1	1	1	1
FBtr0070140	0.26521	0.142715	0.218448	0.515178	0.493388	0.56955	0.476883	0.451645	0.223885	0.691012	0.32783	0.495976	0.220255	0.583889	0.295975	0.413738	0.198657	0.410015	0.194581	0.492109	0.379511	0.303839	0.368988	0.384388	0.390458	0.454737	1	2	0	3	1	3	1	3	1	3	1	3	1	3	1	3	0	3	0	3	0	3	0
FBtr0070142	1	1	1	1	0.130387	8.00716	1	1	1	1	1	1	0.0889965	0.615889	1.77442	0.810077	1	1	13.4653	49.2351	1.86685	2.34915	0.415195	1.31958	0.555595	1.2732	0	0	0	0	0	0	0	0	0	0	0	0	0	0	0	0	0	0	0	0	0	0	0
FBtr0070145	0.240482	0.0398118	0.244419	0.0161576	0.0581355	0.506073	0.121209	0.0575084	0.00673137	0.00513665	0.0266874	0.00916639	0.0352705	0.0612506	0.119428	0.0621416	0.526769	0.0133164	0.160816	0.204896	1.01091	1.58815	0.90427	1.86654	0.553424	1.51552	0	0	0	0	0	0	0	0	0	0	0	0	0	0	0	0	0	0	0	0	0	0	0
FBtr0070146	0.364885	0.175552	0.298268	0.71693	1.00471	0.83856	0.735429	0.525962	0.493065	0.508045	0.457142	0.467258	0.265166	0.395604	0.393668	0.433161	0.521016	0.548016	0.438479	0.52388	0.445528	0.346825	0.473485	0.423101	0.550715	0.512742	3	2	1	4	4	5	4	5	4	5	4	5	4	5	4	5	2	5	2	5	3	5	3
FBtr0070147	0.110609	1.99255	0.639592	2.71407	0.812555	1.33638	0.296304	0.625839	1.32417	3.71574	0.772991	0.107173	2.11587	0.814812	1.06435	0.703068	1.28235	1.32275	2.80768	1.82164	0.730571	0.715948	0.6476	0.766661	0.686419	0.535997	0	0	0	0	0	0	0	0	0	0	0	0	0	0	0	0	0	0	0	0	0	0	0
FBtr0070148	0.0653023	0.0967234	0.210745	0.199929	0.469893	0.645877	0.527041	0.249327	0.413027	0.312709	0.388933	0.444619	0.336466	0.26917	0.332605	0.323049	0.247166	0.162522	0.231428	0.201784	0.425316	0.542635	0.503422	0.601475	0.683941	0.807136	0	0	0	0	0	0	0	0	0	0	0	0	0	0	0	0	0	0	0	0	0	0	0
FBtr0070149	0.149988	1	0.411031	5.73829	1.78849	3.68606	0.773408	0.839259	2.32482	0.0516958	0.993564	0.969572	0.280549	1	0.0582873	0.178584	0.0699149	0.162697	1	0.0493487	0.978014	1.36847	0.775454	1.07024	0.920715	0.832898	0	0	0	0	0	0	0	0	0	0	0	0	0	0	0	0	0	0	0	0	0	0	0
FBtr0070150	0.285962	5.37414	2.71199	1.56695	1.98684	2.67757	2.43314	0.56834	0.115028	0.750262	2.85433	0.19222	1.14899	0.767426	0.603146	0.254671	0.4937	0.019139	1	0.587461	0.76566	1.28398	0.706607	1.04495	0.586415	0.813769	0	0	0	0	0	0	0	0	0	0	0	0	0	0	0	0	0	0	0	0	0	0	0
FBtr0070151	0.621536	0.290605	0.536292	0.740045	0.84283	0.90477	0.608178	0.375113	0.394929	0.406404	0.39319	0.414043	0.208912	0.53063	0.330397	0.505791	0.241467	0.285906	0.251343	0.285711	0.462311	0.435283	0.297145	0.464838	0.203125	0.506501	4	2	2	4	4	4	4	4	4	4	4	4	4	4	4	5	4	4	4	4	4	4	4
FBtr0070155	0.126891	0.283547	0.396939	0.388221	0.597498	0.999936	0.530321	0.400723	0.209769	0.212074	0.25024	0.3227	0.301663	0.260197	0.241361	0.348044	0.361851	0.300093	0.396938	0.284176	0.426889	0.592748	0.532096	0.657195	0.503987	0.628226	0	0	0	0	0	0	0	0	0	0	0	0	0	0	0	0	0	0	0	0	0	0	0
FBtr0070159	1.78338	1.2202	1.70391	0.822417	1.09364	0.877622	1.05995	0.899566	0.682096	0.448741	0.720846	0.359595	2.19714	0.424657	1.80227	0.513802	1.66065	0.667318	1.55278	0.648066	0.35516	0.39015	0.402959	0.412181	0.274153	0.188267	0	0	0	0	0	0	0	0	0	0	0	0	0	0	0	0	0	0	0	0	0	0	0
FBtr0070160	0.890423	1.07351	1.5645	0.963841	1.13514	2.1192	1.04919	1.50755	0.612795	0.985098	0.62495	0.650907	2.58816	1.36729	1.10198	1.44117	1.20767	1.71286	1.11072	1.20268	0.475486	0.324067	0.365092	0.428229	0.248493	0.37025	0	0	0	0	0	0	0	0	0	0	0	0	0	0	0	0	0	0	0	0	0	0	0
FBtr0070163	0.15816	0.113777	0.270884	1	1	1	0.262528	1	0.0930652	1	0.0886248	0.0619028	1	1	0.194343	0.187395	0.107185	1	1	2.10595	0.97469	0.716561	1.10859	0.67724	0.917822	0.569227	0	0	0	0	0	0	0	0	0	0	0	0	0	0	0	0	0	0	0	0	0	0	0
FBtr0070164	24.2031	1	0.182281	1	1.03242	0.0390877	0.175999	1	0.00182544	0.265729	0.0633798	0.00637105	0.11076	0.622948	0.329849	0.695298	0.0176894	1	0.157568	4.23012	2.88747	1.22442	2.28441	0.904152	1.85617	0.632369	0	0	0	0	0	0	0	0	0	0	0	0	0	0	0	0	0	0	0	0	0	0	0
FBtr0070165	1.49602	0.967474	2.10183	0.935673	1.3201	1.34404	0.949335	1.07222	1.02222	0.739663	0.753679	0.545844	0.937787	0.343731	1.34798	0.858426	1.5063	1.93837	1.5242	0.960082	0.305045	0.451342	0.380752	0.293867	0.327761	0.171817	0	0	0	0	0	0	0	0	0	0	0	0	0	0	0	0	0	0	0	0	0	0	0
FBtr0070167	0.481989	0.588756	0.505239	0.719131	1.0534	1.23701	1.23305	1.04926	0.536872	1.1826	1.08096	1.5709	1.05892	1.14129	0.551139	0.909611	1.18343	1.02824	1.19486	1.11553	0.364414	0.260493	0.420118	0.339688	0.467089	0.33104	1	1	0	2	2	1	1	2	2	0	0	2	1	0	0	1	1	0	0	1	1	1	0
FBtr0070170	0.15407	0.129856	0.632144	0.343793	0.243997	0.978127	0.158668	0.605405	0.135473	0.346899	0.262468	0.29276	0.118849	0.326742	0.378303	0.422485	0.354328	0.636566	0.542865	0.527155	0.595924	0.51523	0.70866	0.669073	0.764012	0.710269	0	0	0	0	1	0	0	1	0	0	0	0	1	0	0	1	0	0	0	0	0	0	0
FBtr0070171	1.37524	2.80708	3.07144	1.7699	0.117927	0.326788	1	0.433953	0.227903	1.19991	0.185952	0.635927	11.396	0.0191479	0.459097	1.06813	1	10.8793	0.0398536	0.584263	1.83447	1.63924	1.1415	0.800058	0.889891	0.885048	0	0	0	0	0	0	0	0	0	0	0	0	0	0	0	0	0	0	0	0	0	0	0
FBtr0070172	1	1	0.162322	0.0280775	1	1	0.156595	0.0509326	0.0031384	0.217852	0.116018	0.132529	0.480889	1	0.198994	0.321093	1	0.0560252	12.2469	9.78803	2.2913	2.19993	1.14038	1.15036	0.837102	1.06709	0	0	0	0	0	0	0	0	0	0	0	0	0	0	0	0	0	0	0	0	0	0	0
FBtr0070173	0.925253	0.360787	1.08726	0.532929	0.493105	0.385008	0.657381	0.841975	0.359241	0.313752	0.39667	0.200803	0.166159	0.205644	0.273452	0.318847	0.687686	0.544715	0.512047	0.699373	0.518672	0.479022	0.454329	0.511823	0.336487	0.417511	0	0	0	0	0	0	0	0	0	0	0	0	0	0	0	0	0	0	0	0	0	0	0
FBtr0070174	0.21982	5.15831	1.28065	2.82696	2.22586	3.98081	0.659398	2.47096	1.31191	0.932057	0.954546	0.726452	0.963692	2.43833	0.313039	1.25818	1.73101	2.16376	0.977387	1.75269	0.575516	0.580065	0.616329	0.640717	0.793184	0.337267	0	1	0	1	1	1	1	1	0	1	0	1	0	1	0	1	0	1	0	1	1	1	1
FBtr0070175	0.0353209	0.262293	0.0425512	0.0288231	0.00927312	0.113499	0.591822	0.781393	0.424188	0.39397	0.122741	0.145128	0.391697	0.140715	0.38162	0.343519	0.572308	0.3113	0.550667	0.391367	0.757506	0.732298	1.19473	0.950419	1.65987	1.13779	0	0	0	0	0	0	0	0	0	0	0	0	0	0	0	0	0	0	0	0	0	0	0
FBtr0070176	0.54603	0.573496	0.390343	0.359386	0.230612	0.247059	0.0796517	0.136304	0.0604319	0.0695012	0.0441147	0.0329754	0.114437	0.101884	0.0881446	0.0622949	0.0359481	0.0319727	0.0325095	0.0270963	1.0789	1.09324	0.91298	0.86285	0.64577	0.567309	2	4	2	4	3	4	3	4	1	3	1	3	2	3	2	3	3	3	2	4	2	3	2
FBtr0070179	0.206919	3.49035	0.856327	0.761131	1.10978	1.2912	1.27846	0.510339	0.626653	1.08201	0.656517	0.69245	1.22583	0.676045	0.994771	0.581992	0.800119	0.606318	1.10705	0.725929	0.37036	0.857193	0.484126	0.848612	0.545224	0.89718	0	0	0	0	0	0	0	0	0	0	0	0	0	0	0	0	0	0	0	0	0	0	0
FBtr0070180	1.69521	17.8243	1.75426	0.681673	7.61958	13.426	2.00532	0.230442	0.910852	0.747099	0.298731	0.485438	2.6685	0.0556756	1.18429	0.866476	0.23396	0.0574719	1.15216	43.7684	1.08981	1.81233	1.11047	1.42245	0.888386	1.1121	0	0	0	0	0	0	0	0	0	0	0	0	0	0	0	0	0	0	0	0	0	0	0
FBtr0070182	0.233372	0.295049	0.233825	0.252048	0.509999	0.380038	0.282323	0.319248	0.102785	0.176506	0.183157	0.164771	0.111303	0.197124	0.110503	0.182526	0.24186	0.514604	0.255599	0.320392	0.527777	0.393765	0.535081	0.316744	0.419499	0.171456	2	2	2	2	2	2	2	2	2	2	2	2	2	2	2	2	0	2	0	2	1	1	1
FBtr0070183	1.13516	1.14838	1.58307	0.70363	0.687073	1.58399	0.900719	1.20024	0.576916	0.383085	0.38123	0.426448	0.669098	0.990638	0.861716	0.432623	0.81662	0.839256	0.8471	0.617881	0.389307	0.476095	0.493582	0.528241	0.356807	0.310994	0	0	0	0	1	0	0	1	1	0	0	1	1	0	0	1	1	0	0	1	1	0	0
FBtr0070184	2.85254	15.2579	5.6368	0.241778	3.06022	40.4895	2.07812	0.976726	3.34639	0.525664	0.724821	0.103294	2.34268	1	0.964357	0.512404	9.19551	13.4746	1	1.63929	0.82711	1.7441	0.54892	1.69307	0.453632	1.3211	0	0	0	0	2	0	0	2	0	1	0	1	0	0	0	0	0	0	0	0	1	0	0
FBtr0070185	2.27015	2.17685	1.54833	1.50945	0.628767	1.88634	2.27436	2.85875	2.06105	1.51863	1.37054	3.53406	1.66329	1.71225	1.46098	1.35712	2.06204	0.199006	1.14484	13.0866	0.321992	1.22667	0.379684	0.358207	0.464018	0.270566	0	0	0	0	0	0	0	0	0	0	0	0	0	0	0	0	0	0	0	0	0	0	0
FBtr0070186	0.455988	9.00461	0.724405	0.830887	1.02811	1.615	1.48186	1.63614	3.37823	1.90236	0.725853	2.62313	2.48425	1.16158	1.51186	1.70958	1.46908	1.38553	1.50133	1.63751	0.59771	1.01445	0.82903	1.03175	0.476965	1.17381	0	0	0	0	0	0	0	0	0	0	0	0	0	0	0	0	0	0	0	0	0	0	0
FBtr0070187	0.570209	0.846609	0.511418	0.251669	0.470349	0.706506	0.76961	0.394897	0.499898	0.491107	0.408156	0.318903	0.815295	0.996706	0.579501	0.311419	0.649858	0.660092	0.584808	0.580431	0.219338	0.445386	0.232446	0.46185	0.22852	0.498587	0	0	0	0	0	0	0	0	0	0	0	0	0	0	0	0	0	0	0	0	0	0	0
FBtr0070188	0.592475	0.351779	0.615418	0.523647	0.579869	0.352284	0.370233	0.466218	0.353472	0.750228	0.473914	0.540883	0.236761	0.324615	0.399018	0.429586	0.691109	0.718208	0.600626	0.620528	0.297781	0.298677	0.233009	0.29778	0.210935	0.202537	0	0	0	0	0	0	0	0	0	0	0	0	0	0	0	0	0	0	0	0	0	0	0
FBtr0070189	0.0785906	0.124208	0.200357	0.0409016	1.17738	0.55617	1.21851	1.07874	1.20587	1.33668	0.69094	0.442043	1.57837	0.557263	0.405964	0.592836	1.2474	0.00598294	0.0826483	0.456353	0.713427	0.824231	0.685868	0.867177	0.917225	1.05805	0	0	0	0	0	0	0	0	0	0	0	0	0	0	0	0	0	1	0	1	0	0	0
FBtr0070195	1	1	1	1	0.0498611	1	0.0553853	1	1	0.0340406	1.52823	0.245915	0.907677	0.0133152	0.264562	0.439674	0.673393	0.674884	0.620718	0.836944	0.669406	0.656212	0.768896	0.629641	1.03926	0	0	0	0	0	0	0	0	0	0	0	0	0	0	0	0	0	0	0	0	0	0	0	0
FBtr0070197	0.623581	14.7265	0.785048	0.830015	1.79842	1.81821	1.56605	1.81358	1.7933	2.58086	0.819393	1.32982	1.54923	0.912321	1.16969	1.05599	1.34932	0.859359	1.2114	0.831985	0.332325	1.59702	0.44312	1.39231	0.482956	1.38332	0	0	0	0	0	0	0	0	0	0	0	0	0	0	0	0	0	0	0	0	0	0	0
FBtr0070198	0.229377	1	0.227385	1	1	0.0993457	1	0.0751309	0.00250773	0.0314888	0.0147816	0.0117376	0.0394881	0.0799225	0.240396	0.171492	14.1453	1	1	30.0283	2.43677	2.80143	1.12941	1.32373	0.725337	0.969568	0	0	0	0	0	0	0	0	0	0	0	0	0	0	0	0	0	0	0	0	0	0	0
FBtr0070199	0.285369	1	0.28307	12.3245	0.411587	0.534805	1.73585	19.9736	4.12515	1	2.78747	2.18908	5.10471	0.105479	0.403657	0.948485	4.26611	25.5335	6.51971	2.58077	0.889578	1.40587	0.992344	1.31559	1.04149	1.11318	0	0	0	0	0	0	0	0	0	0	0	0	0	0	0	0	0	0	0	0	0	0	0
FBtr0070200	0.364046	0.512111	1.09591	34.0423	2.19676	1.09421	2.50297	1.29259	1.02835	9.66927	3.37408	1.42418	2.06351	1.19312	0.569684	0.953025	1.80636	0.639239	7.13537	0.774561	0.885982	2.03758	0.636289	1.65049	0.642719	1.7911	0	0	0	0	1	0	0	1	0	0	0	0	1	1	1	1	0	0	0	0	0	0	0
FBtr0070201	0.412879	5.25572	1.39098	0.53894	2.53428	1.13277	2.39156	2.00926	3.7088	0.683477	1.68508	5.20747	2.13816	1.58713	1.24166	0.597393	0.989853	1.44313	3.31128	3.93145	0.523609	0.830582	0.557519	0.889772	0.586925	0.941268	0	0	0	0	2	0	0	2	1	2	1	2	2	2	2	2	0	0	0	0	2	2	2
FBtr0070202	0.00777258	0.0147907	0.0324932	0.00950577	0.0169693	0.0180743	0.0613366	0.065771	0.00561749	0.0298579	2.29885	2.56568	0.190822	0.0368986	0.152053	0.0159157	0.0932097	0.562527	0.187099	1.0613	2.31226	1.88168	2.2994	2.2999	0.791523	0.964062	0	0	0	0	0	0	0	0	0	0	0	0	0	0	0	0	0	0	0	0	2	2	2
FBtr0070203	2.30094	2.9162	0.137316	0.201967	0.739109	2.66005	3.72489	2.06615	8.43907	1	0.790068	9.58518	2.5321	5.40862	8.49191	15.1979	0.00259751	0.244409	0.236564	0.628248	1.18666	1.22236	1.1549	1.09108	0.935885	0.624961	0	0	0	0	0	0	0	0	0	0	0	0	0	1	0	1	0	0	0	0	0	0	0
FBtr0070204	0.253945	1	1	1	1	1	1	0.0751309	1.02773	0.0702972	115.106	180.065	2.13356	1.20402	0.0473909	1	0.249181	1	7.4755	1	2.78178	3.02457	2.34412	2.39907	0.458555	0.601515	0	0	0	0	0	0	0	0	0	0	0	0	0	0	0	0	0	0	0	0	0	0	0
FBtr0070205	1.48769	0.542581	0.93846	1.05074	1.70218	0.875742	2.10539	1.93501	1.61631	3.34379	1.98205	9.70918	1.81257	2.5624	1.48051	0.947157	1.43483	2.60908	39.4307	1.95547	2.21555	1.04667	0.252108	1.19623	0.311986	0.54005	0	0	0	0	0	0	0	0	0	0	0	0	0	0	0	0	0	0	0	0	0	0	0
FBtr0070206	0.0624441	1	0.1241	0.0460561	0.0250284	1	0.114357	0.164463	0.069682	0.141098	0.0458591	0.0853987	0.133133	0.0457584	0.299831	0.353323	0.0346283	1	0.017232	2.61554	0.905236	1.25092	0.52567	1.13709	0.568902	0.938848	1	0	0	1	0	0	0	0	4	0	0	4	3	0	0	3	0	0	0	0	8	0	0
FBtr0070207	0.166778	0.125986	0.430363	0.116101	0.274711	0.106682	0.373431	0.254044	0.150408	0.21141	0.0262822	0.0642617	0.335724	0.493326	0.0685569	0.281126	0.373346	0.0872899	0.0745023	0.372981	0.649676	0.663002	0.637845	0.487493	0.372116	0.460131	0	0	0	0	0	0	0	0	0	0	0	0	0	0	0	0	0	0	0	0	0	0	0
FBtr0070209	0.106747	0.079185	0.655698	0.522948	0.852178	0.9348	0.674901	0.479653	0.456977	0.396339	0.378047	0.532698	0.360414	0.326806	0.585189	0.548526	0.45271	0.424156	0.391869	0.413501	0.423652	0.459731	0.506348	0.560356	0.563919	0.693778	1	1	1	1	2	4	2	4	2	3	2	3	2	4	2	4	2	3	2	3	2	3	2
FBtr0070211	0.300723	3.18816	0.841581	0.327464	0.984119	1.2915	1.19615	1.55091	0.61824	0.669629	0.420173	0.931599	1.40836	0.817594	0.770105	0.767114	0.927135	0.433277	1.89447	1.13023	0.505956	0.737879	0.471421	0.761554	0.460049	0.747817	0	0	0	0	0	0	0	0	0	0	0	0	0	0	0	0	0	0	0	0	0	0	0
FBtr0070212	0.961796	0.833198	0.641781	0.71608	0.656825	0.571852	0.629956	0.340884	1.37372	0.715478	0.788145	1.17817	0.229553	0.560341	0.508667	0.740302	0.414914	0.456031	0.444241	0.589177	0.484123	0.343277	0.34392	0.383849	0.221218	0.344428	0	0	0	0	0	0	0	0	0	0	0	0	0	0	0	0	0	0	0	0	0	0	0
FBtr0070213	1.29146	1	1.8458	0.199412	2.4791	0.578454	2.34079	2.17521	1.52153	0.69475	1.12494	2.64556	8.31826	0.361828	0.0468043	0.300935	0.834894	2.34726	4.53788	1.6052	0.982877	0.777416	0.31415	0.799466	0.270868	0.866359	0	0	0	0	0	0	0	0	0	0	0	0	0	0	0	0	0	0	0	0	0	0	0
FBtr0070216	1.37214	0.592744	0.487562	0.569142	0.857207	0.845516	1.0512	0.938522	0.611845	1.07909	0.529326	0.852443	1.02198	1.7089	0.658758	0.847962	0.62276	0.69344	0.512109	0.583607	0.380106	0.389118	0.422673	0.244272	0.392747	0.249595	0	0	0	0	0	1	0	1	0	1	0	1	0	1	0	1	0	1	0	1	0	0	0
FBtr0070230	0.0703742	0.146045	0.201137	0.257236	0.633261	0.312639	0.713632	0.408527	0.441941	0.46331	0.373023	0.315574	0.446575	0.6154	0.529749	0.344754	0.317392	0.277149	0.254961	0.31823	0.495438	0.367804	0.607264	0.352733	0.782738	0.38991	0	0	0	0	0	0	0	0	0	0	0	0	0	0	0	0	0	0	0	0	0	0	0
FBtr0070231	0.019402	0.00625723	0.00867686	0.00267393	0.0146288	0.00788609	0.00659784	0.00962127	0.0194219	0.044962	0.0470436	0.0060158	0.154082	0.158321	0.20305	0.177573	0.0234538	0.0673608	0.0407677	0.0939396	1.26624	1.14856	0.756649	1.2303	0.471889	0.448073	0	0	0	0	0	0	0	0	0	0	0	0	0	0	0	0	0	0	0	0	0	0	0
FBtr0070233	1.12216	1.1469	2.47356	1.13695	1.84193	1.48979	1.66637	1.17478	1.34766	1.469	0.798101	1.00157	3.655	1.23033	2.7468	1.29736	1.5683	1.48462	1.39131	1.19955	0.462281	0.133201	0.382727	0.159774	0.313577	0.136784	0	0	0	0	0	0	0	0	0	0	0	0	0	0	0	0	0	0	0	0	0	0	0
FBtr0070234	0.225309	0.20077	0.224529	0.0402331	0.171818	0.0615082	0.232968	0.110517	0.105149	0.139715	0.361571	0.171561	0.133274	0.124945	0.00604889	0.0450204	0.320435	0.209795	1	0.0649711	0.983837	0.541659	0.384076	0.516553	0.131756	0.691086	0	0	0	0	0	0	0	0	0	0	0	0	0	0	0	0	0	0	0	0	0	0	0
FBtr0070235	1.15023	0.585244	0.739311	0.536791	0.545662	0.48455	0.582488	0.389231	0.407629	0.568801	0.59108	0.741804	0.330541	0.415296	0.414056	0.362142	0.472873	0.412323	0.558632	0.446404	0.400038	0.234343	0.385875	0.212682	0.367046	0.168178	3	1	0	4	3	3	2	4	1	1	0	2	3	1	0	4	3	3	2	4	2	2	0
FBtr0070236	0.257594	0.110618	0.206565	0.281605	0.662233	0.672005	0.54963	0.467369	0.223385	0.299597	0.19651	0.160448	0.214993	0.324802	0.191791	0.219534	0.339842	0.530245	0.389184	0.595035	0.509225	0.519427	0.581125	0.626094	0.529028	0.63098	0	0	0	0	0	0	0	0	0	0	0	0	0	0	0	0	0	0	0	0	0	0	0
FBtr0070238	0.541694	1.62294	0.571855	2.10495	0.770835	0.936225	1.29335	1.0249	1.07073	0.824322	1.21382	2.99474	0.890187	1.07106	1.41202	0.682263	0.907966	0.368498	0.883372	1.74336	0.30546	0.586832	0.359128	0.533401	0.437797	0.38521	2	2	2	2	2	2	2	2	2	2	2	2	2	2	2	2	2	2	2	2	2	2	2
FBtr0070245	0.0223368	0.0309156	0.125912	0.262663	0.403213	0.230079	0.28419	0.204936	0.153785	0.305446	0.159755	0.264512	0.0884093	0.237128	0.154163	0.0913181	0.191887	0.112864	0.171129	0.132408	0.596574	0.479201	0.695643	0.448488	0.806281	0.568517	0	1	0	1	1	1	1	1	1	0	0	1	0	1	0	1	1	0	0	1	1	0	0
FBtr0070250	0.114958	0.0757976	0.673747	1.00513	1.05131	1.39498	0.594511	1.25432	0.37321	0.70994	0.619622	0.73647	0.863388	0.601588	0.633351	1.13346	0.901052	1.22389	1.28069	0.979394	0.468722	0.429165	0.548738	0.547451	0.63217	0.636405	0	1	0	1	0	1	0	1	0	1	0	1	0	0	0	0	0	0	0	0	2	0	0
FBtr0070251	0.608135	0.228236	0.306861	0.181348	0.732066	1.51618	1.64427	2.27179	16.0165	1.78427	0.0878096	0.131946	2.09358	0.956582	1.06935	2.03638	0.897026	0.193973	0.658338	0.204558	1.99772	0.917972	1.94442	0.932698	0.70002	0.974909	0	0	0	0	0	0	0	0	0	0	0	0	0	0	0	0	0	0	0	0	0	0	0
FBtr0070252	0.588321	0.239727	0.172754	0.1987	0.444634	0.0615751	0.130489	0.142743	0.11313	0.210227	0.120881	0.100909	0.317779	0.237561	0.322574	0.445003	0.514911	0.0578329	0.179293	3.38786	0.60358	2.00322	0.77782	0.434405	0.656622	0.479874	0	0	0	0	0	0	0	0	0	0	0	0	0	0	0	0	0	0	0	0	0	0	0
FBtr0070253	0.0483406	0.0379216	0.0695922	0.0887835	0.133188	0.806937	0.341658	0.542524	0.131224	0.0958703	0.110635	0.105068	0.462222	0.154017	0.295203	0.195071	0.228101	0.233358	0.273276	0.164306	0.637633	1.00188	0.754	1.13838	0.903665	1.00178	0	0	0	0	0	1	0	1	0	1	0	1	1	1	1	1	0	1	0	1	0	0	0
FBtr0070254	0.121091	1	0.0265225	1	0.065987	0.180809	0.00784867	0.0285846	0.142801	0.0210999	0.0585844	0.0119865	0.762447	0.303933	0.457569	0.528588	0.413716	0.797982	0.462509	0.445589	1.01191	0.90548	0.745707	1.30858	0.90449	0.942568	0	0	0	0	0	0	0	0	0	0	0	0	0	0	0	0	0	0	0	0	0	0	0
FBtr0070255	1.46599	1.7343	0.933505	0.874387	1.13249	1.08411	1.1248	0.861683	0.405766	0.634721	0.855442	0.710614	0.723801	0.634559	0.729231	0.782421	0.804284	1.07077	0.87311	0.877283	0.317364	0.349798	0.359195	0.405949	0.190047	0.360093	0	2	0	2	0	3	0	3	0	3	0	3	0	0	0	0	0	0	0	0	0	0	0
FBtr0070257	0.274066	0.138566	0.258052	0.125959	0.0693919	0.470469	0.735178	0.730744	0.335301	0.473178	0.705526	0.0763635	1.6596	1.0848	0.550719	0.945634	0.844508	0.0213502	0.776615	0.259226	0.723459	0.87412	0.672543	0.780053	0.846965	0.792973	0	0	0	0	0	0	0	0	0	0	0	0	0	0	0	0	0	0	0	0	0	0	0
FBtr0070259	0.201897	0.129816	0.450924	0.470695	0.793759	0.964342	0.904887	0.810047	0.447587	0.712619	0.465084	0.916146	1.00046	0.962522	0.543693	1.03158	0.751033	0.717342	0.688228	0.770218	0.392307	0.363716	0.474971	0.47397	0.547362	0.626061	1	0	0	1	1	0	0	1	1	1	1	1	1	1	1	1	1	1	1	1	1	1	1
FBtr0070260	3.67734	3.57825	2.16868	1.99539	1.7746	1.94358	1.60354	1.51713	1.04949	1.80053	1.20317	2.10895	1.14001	1.5986	1.59455	1.36653	1.3187	1.39064	1.17741	1.78931	0.469977	0.334709	0.498312	0.336215	0.409501	0.400913	3	3	3	3	3	3	3	3	3	3	3	3	3	3	3	3	2	3	2	3	3	3	3
FBtr0070269	1.1112	0.930732	0.446337	0.697469	0.870854	0.554771	0.697939	0.329668	0.587846	0.628534	0.623285	0.574272	0.662848	0.75217	0.845162	0.641107	0.93917	0.841759	0.9667	0.817763	0.263489	0.254568	0.326143	0.31749	0.35886	0.401514	0	0	0	0	0	0	0	0	0	0	0	0	0	0	0	0	0	0	0	0	0	0	0
FBtr0070270	1.85065	2.14267	0.836198	1.28314	0.822878	1.31204	0.676543	0.548592	0.589913	1.14316	0.69546	1.01259	0.523265	1.50145	0.525044	0.74352	0.581317	1.06607	0.616017	1.1759	0.511407	0.363046	0.514525	0.420625	0.516843	0.492942	3	3	3	3	3	5	3	5	2	5	2	5	3	5	3	5	3	5	3	5	4	5	4
FBtr0070272	0.686197	5.45873	0.619506	0.972036	0.657565	1.01855	1.37834	1.53899	6.63361	0.374398	0.781932	10.379	2.33027	0.549404	0.811452	0.74869	1.38927	1.99412	2.24947	1.10319	1.04321	1.30873	1.33205	1.19312	0.434505	0.959678	0	0	0	0	0	0	0	0	0	0	0	0	0	0	0	0	0	0	0	0	0	0	0
FBtr0070277	0.172421	4.84116	0.201029	0.119667	0.25723	0.318031	0.264183	0.192615	0.33983	0.204346	0.158768	0.282249	0.295865	0.173072	0.14621	0.230332	0.152265	0.174056	0.181251	0.170362	0.312174	2.18692	0.293119	1.89978	0.19834	1.69386	0	2	0	2	0	2	0	2	1	3	1	3	3	3	3	3	2	2	1	3	3	3	3
FBtr0070278	0.310771	1	0.182281	1	0.0872452	1	1	0.1073	0.0063289	0.0316229	0.0101303	0.00172816	0.199431	1	0.0979141	0.123527	0.125923	0.117332	1	0.12438	1.25396	1.05316	1.41859	0.999493	1.04678	0.574583	0	0	0	0	0	0	0	0	0	0	0	0	0	0	0	0	0	0	0	0	0	0	0
FBtr0070279	0.25512	0.170254	0.303504	0.160197	0.204518	0.169261	0.170665	0.0874016	0.127773	0.109761	0.148607	0.167446	0.248597	0.35256	0.1168	0.247024	0.155092	0.164653	0.168734	0.0948983	0.322433	0.455353	0.332387	0.250584	0.249235	0.271446	2	4	2	4	2	3	1	4	1	3	1	3	0	3	0	3	1	3	0	4	1	4	1
FBtr0070283	1.34819	0.882277	1.36605	0.784372	1.50134	1.08201	1.44694	1.12188	0.804167	1.26493	0.546923	0.746499	2.85351	1.13639	0.913504	1.16488	1.07955	1.91845	1.35135	1.27585	0.471434	0.291809	0.33761	0.211064	0.0505009	0.166365	1	1	1	1	1	1	1	1	0	1	0	1	0	1	0	1	1	1	1	1	1	1	1
FBtr0070284	0.0626451	0.307647	0.0594062	0.100394	0.0645307	0.0661835	0.061523	0.15886	0.290655	0.015826	0.0584064	0.0150806	2.44395	13.6205	0.116502	0.0488714	0.0217433	0.1972	0.0125658	0.0315006	2.35178	2.93579	0.941033	1.00086	0.0345447	0.674049	3	0	0	3	3	0	0	3	5	2	2	5	3	7	3	7	5	6	3	9	4	3	0
FBtr0070285	1.70328	14.2475	0.429162	0.378663	0.240393	0.988489	0.604269	1.11584	0.25794	1.20931	0.0809263	0.541765	0.906316	0.246934	0.334223	0.102564	0.310396	0.369908	0.436802	0.206466	0.886303	2.23743	1.07009	1.77926	0.881899	1.60608	0	0	0	0	0	0	0	0	0	0	0	0	0	0	0	0	0	0	0	0	0	0	0
FBtr0070288	0.367171	1	0.426868	2.0267	0.404652	0.355056	0.878264	0.288477	0.123849	1	0.124791	1	0.581376	1	0.265782	2.88361	0.249235	1	0.364529	0.323931	0.592434	0.744602	0.712781	0.662208	0.463398	0.878472	0	0	0	0	0	0	0	0	0	2	0	2	3	1	1	3	1	0	0	1	1	0	0
FBtr0070289	0.0385875	0.043748	0.110861	0.0624507	0.287834	0.298371	0.331275	0.166412	0.0814984	0.098933	0.13228	0.124369	0.149155	0.122284	0.0954801	0.144597	0.155019	0.0829168	0.151539	0.121385	0.590085	0.559504	0.721041	0.697586	0.72802	0.819243	0	0	0	0	3	0	0	3	3	0	0	3	0	0	0	0	0	0	0	0	0	0	0
FBtr0070293	0.0539123	0.0511858	0.0590721	0.0785811	0.126684	0.15213	0.189229	0.206157	0.0032779	0.00963813	0.0947189	0.0906047	0.170464	0.130919	0.00947942	0.00960986	0.0950733	0.0997146	0.119176	0.0821597	0.674949	0.672213	0.737384	0.722026	0.596303	0.577404	0	1	0	1	1	2	1	2	0	1	0	1	1	2	1	2	1	2	1	2	2	1	1
FBtr0070295	0.00816712	0.0200704	0.0339146	0.00684084	0.0117619	0.0195729	0.0318286	0.106426	0.00551877	0.0983765	0.0258368	0.181443	0.00957474	0.0391215	0.142377	0.0445704	0.0480711	0.0352653	0.0116871	0.0127315	1.24475	0.985126	0.641885	0.95157	0.62255	1.20008	0	0	0	0	0	0	0	0	0	0	0	0	0	0	0	0	0	0	0	0	0	0	0
FBtr0070296	0.0610134	0.0305442	0.062947	0.0468109	0.199553	0.175323	0.205796	0.147349	0.0980298	0.0731863	0.164432	0.107134	0.151602	0.178222	0.159137	0.129037	0.177452	0.0960566	0.190368	0.152475	0.368047	0.456563	0.502921	0.589831	0.614187	0.720337	0	0	0	0	0	0	0	0	0	0	0	0	0	0	0	0	0	0	0	0	0	0	0
FBtr0070297	0.635104	0.444034	0.485518	0.626586	1.02634	1.01274	0.898236	1.1098	0.657957	0.754286	0.660715	0.50915	0.948709	1.00333	0.885492	0.788302	0.982547	0.985167	0.913821	0.959768	0.226064	0.282534	0.271417	0.36378	0.322624	0.394814	0	0	0	0	0	0	0	0	0	0	0	0	0	0	0	0	0	0	0	0	0	0	0
FBtr0070298	0.0054641	0.068352	0.0368882	0.00840735	0.0383924	0.457473	0.635732	0.226931	0.364707	0.609947	0.29202	0.174758	0.091103	0.312325	0.354487	0.321709	0.241856	0.467535	0.489497	0.365051	0.833939	0.619528	1.08976	0.901623	1.70159	1.05399	0	0	0	0	0	0	0	0	0	0	0	0	0	0	0	0	0	0	0	0	0	0	0
FBtr0070301	0.232861	1	1	1	0.0604574	1	4.83304	1	0.250836	0.0233813	0.093031	0.0545448	0.149738	30.0497	0.358873	0.305499	5.29667	0.0800308	1	2.12485	1.50799	2.53665	1.73538	0.730335	1.46158	0	0	0	0	0	0	0	0	0	0	0	0	0	0	0	0	0	0	0	0	0	0	0	0
FBtr0070308	0.605145	0.82258	0.830236	0.996586	0.939385	1.2595	0.718171	1.32118	0.257231	0.660828	0.470774	0.498521	0.722502	0.676692	0.358062	0.565538	0.789551	1.15523	0.897546	0.93857	0.350416	0.328315	0.389886	0.353415	0.186131	0.211272	1	1	1	1	1	1	1	1	1	1	1	1	1	1	1	1	1	1	1	1	1	1	1
FBtr0070310	0.441368	0.0882739	0.52325	0.590937	0.34923	0.760673	0.353529	0.699076	0.378397	0.644494	0.323389	0.381987	0.457456	0.631452	0.470361	0.593916	0.61372	0.585493	0.515066	0.656606	0.209016	0.344063	0.188896	0.476222	0.198329	0.571868	0	0	0	0	0	0	0	0	0	0	0	0	0	0	0	0	0	0	0	0	0	0	0
FBtr0070311	1.87531	0.844602	1.19803	0.907314	1.08828	0.508255	0.887076	0.826076	0.946382	1.14289	1.23097	0.962947	0.995351	1.09698	1.05824	1.27519	1.32549	1.31976	1.44141	1.34044	0.242416	0.257705	0.295116	0.241189	0.33954	0.231928	0	1	0	1	0	1	0	1	0	1	0	1	0	0	0	0	0	1	0	1	0	1	0
FBtr0070312	1.63659	1.63429	0.917254	1.11171	0.818015	0.702181	0.720095	0.597942	0.727053	0.810579	0.678425	0.576098	0.815004	1.12009	0.822446	1.10711	0.961078	1.15322	0.920347	1.22512	0.304486	0.328827	0.396345	0.449181	0.407544	0.465313	1	0	0	1	1	0	0	1	1	0	0	1	1	0	0	1	1	0	0	1	1	0	0
FBtr0070313	0.55909	0.630818	1.69325	0.810161	1.08657	1.01821	0.93372	1.2709	0.784819	0.725736	0.617016	0.478164	0.720711	0.596387	0.793396	0.817758	0.951137	1.17422	0.943614	0.89337	0.352389	0.301761	0.439084	0.345748	0.441868	0.295525	0	4	0	6	4	4	2	6	5	4	3	6	5	4	3	6	2	0	0	2	5	2	2
FBtr0070314	0.57648	0.383489	1.65446	1.23146	1.74176	1.52745	1.43476	1.77779	1.21242	1.27223	1.17211	0.872878	1.4815	1.35979	1.09192	1.49628	1.4272	1.69228	1.53058	1.23542	0.252878	0.318338	0.324225	0.419131	0.394134	0.493429	0	1	0	1	1	1	1	1	0	0	0	0	1	1	1	1	0	0	0	0	1	0	0
FBtr0070315	1.33135	1.02557	0.562808	0.873594	0.966184	0.691564	0.820096	0.620378	0.997265	1.20271	0.659328	1.10374	0.493944	1.32767	0.728575	0.789806	0.556058	0.562245	0.508402	0.698211	0.353709	0.295054	0.308802	0.2522	0.34875	0.227756	0	0	0	0	0	0	0	0	0	0	0	0	0	0	0	0	0	0	0	0	0	0	0
FBtr0070316	0.10972	0.12148	0.315873	0.935815	1.01502	1.28846	1.71681	1.39285	1.066	1.56834	0.982442	1.03801	0.986076	2.05781	1.31414	1.23773	0.916241	0.896818	0.899848	0.852314	0.486258	0.448907	0.66693	0.485522	0.924367	0.616597	3	1	1	3	3	3	3	3	3	3	3	3	3	3	3	3	3	3	3	3	3	3	3
FBtr0070317	1.30589	0.947462	0.283305	0.497565	1.02863	0.850815	0.927117	0.708441	0.479733	0.622444	0.39912	0.554701	0.335719	0.521584	0.423484	0.646651	0.567818	0.734895	0.505016	0.784008	0.545638	0.213415	0.552936	0.250271	0.488198	0.260227	3	3	3	3	3	3	3	3	3	3	3	3	3	3	3	3	3	3	3	3	3	3	3
FBtr0070318	1.17925	0.844402	1.00513	0.570126	0.383335	0.407334	0.211979	0.260908	0.313774	0.304902	0.36442	0.324007	0.15064	0.254734	0.401504	0.394673	0.475352	0.486158	0.506661	0.538327	0.667251	0.411755	0.707481	0.489255	0.675529	0.480219	1	1	1	1	1	1	1	1	1	1	1	1	1	1	1	1	1	1	1	1	1	1	1
FBtr0070321	0.851894	0.691774	1.25691	0.613922	0.976231	0.996401	0.879001	0.64717	0.497641	0.289567	0.48095	0.389421	0.378171	0.326882	0.328734	0.417928	1.23835	0.712451	0.847125	0.723285	0.437219	0.380911	0.359527	0.410803	0.186809	0.238219	0	0	0	0	0	0	0	0	0	0	0	0	0	0	0	0	0	0	0	0	0	0	0
FBtr0070328	0.380011	6.47375	0.842953	2.31845	2.29488	3.89151	2.37332	1.12413	0.105533	0.204735	1.67654	0.429256	0.673404	1.21843	0.890973	0.789628	1.43156	0.0352945	0.449356	0.752804	0.716543	1.17432	0.763176	1.00327	0.687714	0.669598	0	0	0	0	0	0	0	0	0	0	0	0	0	0	0	0	0	0	0	0	0	0	0
FBtr0070330	0.0846142	0.228079	0.155149	0.376735	0.339039	0.510349	0.135112	0.305011	0.066027	0.208533	0.148494	0.165348	0.170118	0.252718	0.230427	0.278172	0.168073	0.314518	0.182544	0.289089	0.454064	0.330597	0.627749	0.427831	0.622363	0.338041	4	2	1	5	3	3	2	4	4	3	2	5	3	4	3	4	2	3	1	4	3	4	1
FBtr0070331	1.3883	0.82526	1.21303	0.514773	0.925459	0.720451	0.676949	0.901083	0.421319	0.534061	0.669374	0.533138	0.627416	0.371745	0.826811	0.622058	1.15197	1.10658	1.71781	1.08334	0.416281	0.34825	0.414004	0.250399	0.298737	0.226442	0	0	0	0	0	0	0	0	0	0	0	0	0	0	0	0	0	0	0	0	0	0	0
FBtr0070334	0.223155	0.17875	0.413051	0.567954	0.95214	0.78426	1.11909	0.88372	0.582872	1.24265	0.450625	1.02058	0.903773	0.865481	0.689167	0.784357	0.830886	0.832734	0.828872	0.921198	0.398833	0.347853	0.550816	0.476185	0.63074	0.517582	0	0	0	0	0	0	0	0	0	0	0	0	0	0	0	0	0	0	0	0	0	0	0
FBtr0070338	0.131773	1	0.0697963	0.045876	0.0790175	0.0132969	0.0347001	0.0315596	0.0511827	0.0853045	0.0830733	0.0159644	0.032452	0.372515	0.144839	0.16051	0.0884097	0.0942314	0.611332	0.191475	1.29789	1.49804	0.443586	1.98043	0.509166	1.77885	0	0	0	0	0	0	0	0	0	0	0	0	0	0	0	0	0	0	0	0	0	0	0
FBtr0070339	1.09639	9.5901	0.619113	13.8871	0.167885	0.0977174	0.0856444	0.721417	0.19653	0.193888	0.221301	0.152903	0.107184	1.17373	0.218331	1	0.224378	1	0.271395	1.08787	0.964905	1.65688	0.979381	1.47779	0.946769	1.11568	1	0	0	1	1	0	0	1	0	0	0	0	0	0	0	0	1	0	0	1	1	0	0
FBtr0070340	0.0631431	0.187752	0.0788283	0.103042	0.117895	0.118838	0.205859	0.0891872	0.0810362	0.0806366	0.137812	0.0524368	0.222387	0.240587	0.109901	0.106099	0.0826049	0.092129	0.0746901	0.0711029	0.475967	0.501467	0.462622	0.438208	0.548899	0.350766	0	2	0	2	0	1	0	1	0	3	0	3	3	3	3	3	2	2	2	2	3	2	2
FBtr0070341	0.446674	0.664616	0.332553	0.583498	0.827673	0.785989	0.965233	0.489898	0.564734	0.582781	0.893131	0.490774	0.890375	0.659089	0.519245	0.472967	0.499332	0.440964	0.64454	0.495393	0.334456	0.193423	0.386306	0.187786	0.469002	0.199032	0	0	0	0	0	0	0	0	0	0	0	0	0	0	0	0	0	0	0	0	0	0	0
FBtr0070342	0.00582313	11.7848	0.0596561	0.247309	0.844329	3.3501	0.379899	59.3802	0.269385	1.3603	0.265646	1.74823	0.418783	0.370382	0.832135	1.10206	0.912561	1.08747	1.44969	1.20542	0.833532	2.24336	0.985345	1.78066	1.19447	1.47459	0	0	0	0	0	0	0	0	0	0	0	0	0	0	0	0	0	0	0	0	0	0	0
FBtr0070345	0.665185	0.406861	0.538523	0.756786	0.673429	0.716457	1.13965	0.816175	1.21522	2.73841	0.632237	1.48305	1.6302	0.846161	1.94032	0.950508	0.506496	0.359172	0.462668	0.39446	0.550372	0.751444	0.356558	0.740054	0.350418	0.271169	3	5	3	5	3	5	3	5	3	5	3	5	3	5	3	5	3	5	3	5	3	5	3
FBtr0070346	0.0668782	0.055294	0.355106	0.284561	0.891526	0.901153	0.853845	0.427809	0.397119	0.621331	0.590174	0.890594	0.430729	0.592924	0.644136	0.467461	0.470817	0.519913	0.55134	0.484702	0.461441	0.484719	0.602543	0.638108	0.738293	0.856306	0	1	0	1	2	1	1	2	1	2	1	2	2	2	2	2	3	2	2	3	3	2	2
FBtr0070347	1.05176	0.846651	1.47543	0.987665	2.09914	1.5919	1.56255	1.7472	0.973818	0.84708	1.21014	0.525164	0.748175	0.658594	0.776551	0.614785	1.52773	1.41089	1.33141	1.10221	0.324251	0.409911	0.29715	0.436062	0.278115	0.34233	0	1	0	1	0	1	0	1	0	1	0	1	0	0	0	0	0	1	0	1	0	0	0
FBtr0070349	0.668088	0.196259	0.647881	0.967327	1.40418	1.42825	0.885259	1.39801	0.665531	0.707369	0.617297	0.601613	0.971501	0.618797	0.589987	0.759861	0.677437	0.854369	0.665527	1.13218	0.321989	0.438055	0.373515	0.543347	0.390547	0.575584	0	0	0	0	0	0	0	1	0	0	0	0	0	0	0	0	0	0	0	0	0	0	0
FBtr0070350	1.09806	0.32556	0.388039	0.37636	1.08149	0.818071	1.30363	0.620503	0.578939	0.729853	0.591656	0.551634	0.530727	0.617845	0.588056	0.756824	0.708934	0.501027	0.722622	0.507055	0.392399	0.276618	0.436914	0.339291	0.412788	0.426779	0	0	0	0	0	0	0	0	0	0	0	0	0	0	0	0	0	0	0	0	0	0	0
FBtr0070355	0.0164595	0.074868	0.343241	0.0310589	0.00548821	0.485932	0.790679	0.63043	0.0816796	7.72493	0.00694761	0.0768014	0.0853306	0.159408	0.160827	0.0239722	0.0183704	0.154238	0.00341496	0.103408	1.64154	2.52541	1.51218	2.03306	1.27821	0.975644	0	0	0	0	3	0	0	3	0	0	0	0	0	0	0	0	0	0	0	0	0	0	0
FBtr0070363	1.36263	1.03962	0.52091	0.902639	0.643474	0.508316	0.472931	0.433315	0.579482	0.522923	0.447362	0.403011	0.368571	0.807297	0.545436	0.527644	0.327797	0.387567	0.286635	0.351803	0.549505	0.408264	0.515841	0.421675	0.552937	0.410291	1	1	1	1	1	1	1	1	1	1	1	1	1	1	1	1	1	1	1	1	1	1	1
FBtr0070364	2.02021	1.82157	1.57379	0.672379	0.959227	1.34252	0.956606	1.45405	0.52906	0.926573	0.410405	0.760361	1.1066	0.822552	0.86007	1.01035	1.1575	1.11076	1.07595	1.06368	0.438473	0.321077	0.574909	0.386364	0.375761	0.36245	0	0	0	0	0	0	0	0	0	0	0	0	0	0	0	0	0	0	0	0	0	0	0
FBtr0070365	2.10887	0.7481	3.18486	1.09235	2.27712	1.80614	1.84414	2.19872	1.29747	0.913621	1.09682	0.81621	1.87231	0.758264	1.63152	1.27453	2.15655	1.65774	2.44262	1.38783	0.299356	0.391863	0.381569	0.473455	0.247279	0.451764	0	0	0	0	0	0	0	0	0	0	0	0	0	0	0	0	0	0	0	0	0	0	0
FBtr0070366	0.361091	0.336151	0.808305	0.508231	0.611691	0.38465	0.711101	0.654845	0.393106	0.549671	0.421931	0.543381	0.548875	0.47503	0.401054	0.672276	0.784627	0.987063	0.983462	0.83498	0.354551	0.335759	0.337635	0.235835	0.308487	0.302336	0	0	0	0	0	0	0	0	0	0	0	0	0	0	0	0	0	0	0	0	0	0	0
FBtr0070367	0.0622381	0.0710055	0.690978	0.668128	0.998617	1.10293	1.01918	0.905659	0.713435	0.722217	0.512552	0.584351	1.04758	0.75534	0.557072	0.573536	0.630614	0.523082	0.605864	0.476608	0.432026	0.4298	0.531288	0.517601	0.644299	0.651365	0	0	0	0	0	0	0	0	0	0	0	0	0	0	0	0	0	0	0	0	0	0	0
FBtr0070369	2.11522	1.99413	0.685491	0.587629	1.06268	0.766178	0.596722	0.823905	0.520481	0.405986	0.477119	0.311778	0.222773	0.223328	0.31873	0.469006	0.304844	0.28399	0.480762	0.582174	0.82207	0.797735	0.688929	0.749437	0.624849	0.615593	0	1	0	1	0	0	0	0	0	1	0	1	0	0	0	0	0	0	0	0	0	1	0
FBtr0070371	0.419886	0.550658	0.525582	0.996113	1.40703	1.40675	1.20006	1.15841	0.691202	0.876187	0.812552	1.02246	0.907131	1.03426	0.709733	0.937897	0.969172	0.995094	0.985473	0.98715	0.346324	0.215072	0.459388	0.285252	0.550545	0.350439	0	0	0	0	0	0	0	0	0	0	0	0	0	0	0	0	0	0	0	0	0	0	0
FBtr0070372	0.766839	0.63229	1.94659	0.943579	1.16955	1.21377	1.04194	0.728926	0.82836	0.651783	0.66723	0.686051	1.15626	0.597706	1.43672	0.586873	2.00922	1.15723	1.62011	0.82204	0.376653	0.286248	0.436651	0.281419	0.410684	0.293253	0	0	0	0	0	0	0	0	0	0	0	0	0	0	0	0	0	0	0	0	0	0	0
FBtr0070374	1.04021	1	0.738418	0.0364164	1.03275	1	0.670714	0.456603	2.12218	0.934002	0.833774	1.89168	0.474497	2.34268	1.53547	0.398095	1	1	0.610913	0.591267	0.489321	0.719815	0.499183	0.703747	0.222437	0.750299	0	0	0	0	0	0	0	0	0	0	0	0	0	0	0	0	0	0	0	0	0	0	0
FBtr0070375	0.370356	0.235753	0.874761	0.677444	1.85996	1.57316	1.38805	0.882709	0.997754	0.938229	0.947097	0.816588	1.17021	1.07509	1.04288	0.601964	1.59013	1.09248	1.26806	0.955119	0.35803	0.396869	0.470267	0.507703	0.572685	0.661352	0	0	0	0	0	0	0	0	0	0	0	0	0	0	0	0	0	0	0	0	0	0	0
FBtr0070376	0.245526	0.220078	0.597741	0.950607	1.24093	1.78446	1.536	1.58899	1.06618	1.40735	0.829827	1.61489	1.23858	1.36162	1.2735	0.91856	1.13938	1.51529	1.23234	1.30545	0.365279	0.362893	0.503341	0.463485	0.650655	0.622224	0	0	0	0	0	0	0	0	0	0	0	0	0	0	0	0	0	0	0	0	0	0	0
FBtr0070379	0.639581	0.44168	0.811408	0.501519	0.581693	0.298843	0.858217	0.495652	1.37186	1.02625	0.631222	0.943369	0.509277	1.19871	0.602812	0.705936	0.270139	0.299665	0.395973	0.322264	0.45336	0.525947	0.359928	0.476829	0.183954	0.217102	3	2	2	3	2	2	2	3	3	2	2	3	3	2	2	3	4	3	3	4	4	3	3
FBtr0070381	0.645772	0.945096	0.548202	0.507591	0.311168	0.632163	0.782689	0.870317	1.81543	2.37162	0.41977	0.937755	1.02949	0.787543	0.742699	0.694483	0.742592	0.663787	0.825448	0.605291	0.52949	0.595393	0.72399	0.645507	0.347384	0.275945	2	2	2	2	0	2	0	2	0	0	0	0	2	2	2	2	2	2	2	2	0	0	0
FBtr0070384	0.0908839	0.0450834	0.268977	0.198094	0.819995	1.56778	2.29374	1.94115	1.41577	1.28305	1.01921	1.56415	2.22765	1.91441	1.82723	1.82578	1.4986	1.52788	2.61013	1.8296	0.609212	0.503451	0.817302	0.716076	1.15112	1.02025	0	0	0	0	0	0	0	0	0	0	0	0	0	0	0	0	0	0	0	0	0	0	0
FBtr0070385	0.731112	0.716616	0.13971	0.195287	0.722391	1.43252	1.13842	1.12759	0.934596	0.883001	0.569248	0.660253	2.95146	1.38417	1.98373	1.1993	0.668713	0.544179	0.447337	0.578344	0.812134	0.463354	0.482282	0.507207	0.601645	0.617381	0	0	0	0	0	0	0	0	0	0	0	0	0	0	0	0	0	0	0	0	0	0	0
FBtr0070386	1.0019	0.699139	0.916327	0.804328	1.04928	1.21442	1.15397	1.53736	0.574967	1.00042	0.754657	0.662973	2.30155	1.02058	1.19964	1.29719	1.46118	1.02519	1.18769	0.844748	0.406283	0.27387	0.232855	0.344083	0.096162	0.362953	0	0	0	0	0	0	0	0	0	0	0	0	0	0	0	0	0	0	0	0	0	0	0
FBtr0070387	0.0617203	1.29873	0.0282107	0.364401	0.405878	1.27893	0.304478	0.724729	0.745545	1.72993	0.162525	0.288902	0.726028	0.475845	0.452984	0.334098	0.855514	0.654698	0.702635	0.62567	0.681448	0.631204	0.939638	0.609662	0.921327	0.495535	0	0	0	0	0	0	0	0	0	0	0	0	0	0	0	0	0	0	0	0	0	0	0
FBtr0070388	0.302944	0.311051	0.575053	0.104748	0.790062	0.536791	0.856332	0.141248	0.867051	0.129241	0.307244	0.145721	1.08048	0.293468	0.570419	0.237191	1.12434	0.351787	1.37814	0.296418	0.448639	0.521224	0.426791	0.737374	0.395423	0.721242	0	0	0	0	0	0	0	0	0	0	0	0	0	0	0	0	0	0	0	0	0	0	0
FBtr0070389	0.819462	0.257256	1.2447	0.663746	0.932075	1.05663	1.05975	0.638562	0.593825	0.813651	0.38998	0.41622	0.679665	0.837736	0.99324	0.759831	1.06861	0.882137	0.863801	0.711464	0.293671	0.3273	0.37044	0.441723	0.179939	0.499233	1	1	1	1	1	1	1	1	0	1	0	1	1	1	1	1	1	1	1	1	0	0	0
FBtr0070390	0.477819	0.487644	1.40263	0.771914	1.10371	2.45706	0.995302	1.70776	0.302838	0.923937	0.260003	0.663444	0.57936	0.423393	0.490025	0.59522	0.884942	1.16265	0.897733	1.18658	0.50621	0.609385	0.626579	0.650214	0.387328	0.663843	0	0	0	0	1	0	0	1	0	0	0	1	0	0	0	1	0	0	0	0	0	0	0
FBtr0070392	1.67141	1.88102	1.93852	1.57438	0.132182	0.157929	0.0164173	0.0205812	0.636207	2.73786	3.56135	2.14873	0.497622	0.604331	0.153627	0.081083	0.54172	0.551467	1	1	1.08541	0.890503	1.0178	0.774946	1.07089	1.05215	0	0	0	0	0	0	0	0	0	0	0	0	0	0	0	0	0	0	0	0	0	0	0
FBtr0070393	0.121295	0.0706753	0.328289	0.532661	1.03802	1.10014	1.11364	0.497562	0.813317	2.06341	0.645947	0.929222	0.986202	1.23332	0.8941	1.02744	0.802755	0.474828	0.889951	0.634277	0.414327	0.644175	0.580227	0.795701	0.768119	0.767773	1	0	0	1	1	1	1	1	1	1	1	1	1	1	1	1	1	1	1	1	1	1	1
FBtr0070396	2.77503	0.817621	2.35814	1.37053	1.71156	0.626219	1.16606	0.526401	1.38101	1.21446	1.95131	1.11454	0.657354	0.732328	1.04538	1.00592	0.969287	0.988648	0.989891	0.848978	0.454986	0.286478	0.319235	0.359025	0.353965	0.451144	0	0	0	0	0	0	0	0	0	0	0	0	0	0	0	0	0	0	0	0	0	0	0
FBtr0070397	0.0773036	1	0.0825622	1	0.0360684	0.167805	0.108633	0.263883	0.0162982	0.0440452	0.0140293	1.80923	0.909248	0.137034	0.0209789	1	0.0592974	0.141063	0.0299538	0.149296	2.02132	1.0391	0.701454	0.952352	0.394304	0.747511	0	0	0	0	0	0	0	0	0	0	0	0	0	0	0	0	0	0	0	0	0	0	0
FBtr0070398	0.72067	0.426263	0.829433	0.826182	1.31459	1.03898	1.18008	1.2761	0.825574	0.678312	1.21215	0.496175	0.79534	1.02277	1.08384	0.671451	1.23609	0.947935	1.0856	0.757388	0.209546	0.322149	0.246733	0.412221	0.278552	0.40446	0	1	0	1	0	1	0	1	0	1	0	1	0	1	0	1	0	1	0	1	0	1	0
FBtr0070399	0.203003	1	0.148328	0.153892	0.453684	0.110936	0.102715	1	0.0767275	0.0298645	0.00438071	0.0216948	0.0974666	2.20639	0.258574	0.24414	0.103795	0.168921	0.0598142	0.76048	0.851975	1.21727	0.949867	1.23849	0.690198	0.885203	0	0	0	0	0	0	0	0	0	0	0	0	0	0	0	0	0	0	0	0	0	0	0
FBtr0070401	0.988655	0.732601	0.591776	0.450547	0.560104	0.258888	0.324104	0.161743	0.257714	0.204873	0.396234	0.268105	0.119224	0.233547	0.295195	0.293046	0.500695	0.391372	0.3588	0.3991	0.547858	0.488927	0.508217	0.616831	0.447208	0.627429	4	4	4	4	4	4	4	4	3	4	3	4	3	3	2	4	2	4	2	4	4	4	4
FBtr0070405	0.717025	0.376534	1.61318	1.0281	1.64775	1.1768	1.06892	1.73486	0.601905	0.560705	0.844269	0.560129	0.724792	0.459423	1.11874	0.876578	1.38491	0.971024	1.22609	0.720168	0.342111	0.481996	0.4179	0.561483	0.356336	0.517573	1	2	1	2	1	2	1	2	1	2	1	2	1	2	1	2	1	2	1	2	1	2	1
FBtr0070406	0.289125	2.1859	0.294333	0.488658	1.19173	0.776377	0.746064	0.191008	0.505336	0.262901	0.384773	0.387899	0.824326	0.595081	0.824422	0.510188	0.993224	0.575915	0.789695	0.526233	0.445667	0.869293	0.614791	1.04679	0.684154	0.970057	1	1	1	1	2	2	2	2	1	2	1	2	1	1	1	1	1	2	1	2	1	2	1
FBtr0070407	0.843541	3.37117	3.31112	2.28991	1.71486	2.03632	1.23874	0.86432	0.745843	0.425943	0.296953	1.11512	0.315816	1.41824	0.728743	1.7424	0.25969	1.33745	0.624427	0.929587	0.919005	0.547534	0.78742	0.64601	0.609414	0.480732	0	1	0	1	0	1	0	1	0	1	0	1	0	1	0	1	0	1	0	1	0	0	0
FBtr0070408	0.389893	0.251716	0.631107	0.936699	1.61108	1.37475	2.05963	0.617343	0.879295	1.09854	0.591975	1.65442	0.526266	0.931487	0.459345	1.77531	0.642171	0.52948	0.366408	0.47875	0.694951	0.532451	0.643015	0.513241	0.675797	0.600044	0	0	0	0	0	0	0	1	0	0	0	1	0	0	0	1	1	0	0	2	1	0	0
FBtr0070411	0.766983	0.820791	0.774779	1.33774	1.75518	2.2335	1.71521	2.76964	1.88088	0.983781	1.58031	1.6062	1.02941	1.49728	1.28752	1.13198	1.53607	1.11919	1.3236	1.40596	0.293343	0.400267	0.358273	0.462177	0.444516	0.489075	0	0	0	0	0	0	0	0	0	0	0	0	0	0	0	0	0	0	0	0	0	0	0
FBtr0070412	2.78436	2.50153	2.12265	1.77175	0.796168	0.47136	0.523456	0.490748	0.727309	0.580064	1.06985	1.17369	0.42962	0.482916	1.29108	0.921084	0.974557	0.936485	0.8864	0.894961	0.639546	0.642096	0.677928	0.711285	0.691237	0.764979	3	6	3	6	3	5	3	5	2	4	2	4	2	4	2	4	3	5	3	5	3	5	3
FBtr0070414	1.68988	1.26388	0.817591	0.388154	0.706514	0.383285	0.841691	0.791111	0.368286	0.392603	0.462693	0.286339	0.322507	0.47779	0.668129	0.513294	1.17067	1.35876	1.14547	0.983055	0.5148	0.57369	0.576316	0.644551	0.44823	0.591259	5	5	5	5	5	5	5	5	5	4	4	5	5	5	5	5	3	4	2	5	2	5	2
FBtr0070416	0.0359858	1	0.0813747	0.0577939	0.663191	0.649058	0.576314	0.69962	0.421929	0.664767	0.180324	0.34743	0.936157	0.520103	0.567701	0.593644	0.965407	1.00004	1.06188	1.0295	0.674548	0.469338	0.811129	0.570775	0.96221	0.655322	0	0	0	0	0	0	0	0	0	0	0	0	0	0	0	0	0	0	0	0	0	0	0
FBtr0070417	0.239011	0.0819478	0.19891	0.0431116	0.270243	0.0820188	0.404849	0.167737	0.307222	0.121323	0.0537652	0.0742954	0.552379	0.142881	0.263668	0.184997	0.250416	0.142587	0.217691	0.0888414	0.475649	0.40571	0.477449	0.457118	0.320947	0.561849	0	0	0	0	0	0	0	0	0	0	0	0	0	0	0	0	0	0	0	0	0	0	0
FBtr0070418	1.15393	1.17526	0.562023	0.810008	0.808785	0.569223	0.479596	0.349875	0.663815	0.839735	0.515882	0.803645	0.489896	0.659736	0.683363	0.602776	0.765032	0.647192	0.556041	0.607859	0.307575	0.309323	0.363161	0.36742	0.40315	0.486891	0	1	0	1	0	1	0	1	0	1	0	1	0	1	0	1	0	1	0	1	0	1	0
FBtr0070419	0.916225	1.15201	0.671371	1.03151	0.829408	0.757823	0.754348	0.836142	0.757031	0.93813	0.692241	0.76039	0.553003	0.937552	0.698474	0.912263	0.750647	0.882902	0.847421	0.734616	0.137091	0.146704	0.117727	0.173299	0.131879	0.190625	1	1	1	1	1	1	1	1	1	1	1	1	1	1	1	1	0	1	0	1	1	1	1
FBtr0070420	0.648578	0.760812	0.72961	0.886451	1.1359	1.17599	1.52355	1.19586	1.88423	1.61078	1.24642	1.80563	1.86279	2.04524	1.36297	1.13518	0.816826	0.345368	0.723598	0.348532	0.38939	0.506532	0.39336	0.326401	0.3999	0.214494	0	0	0	0	0	0	0	0	0	0	0	0	0	0	0	0	0	0	0	0	0	0	0
FBtr0070422	0.0753893	1.42067	0.423509	0.0448887	0.584275	0.509316	0.671069	0.252329	0.187272	0.38903	0.398882	0.144723	0.521599	0.143897	0.282941	0.0625425	0.329567	0.194685	0.239323	0.228468	0.499485	1.19635	0.582379	1.08449	0.599553	1.08914	2	0	0	2	0	0	0	0	0	2	0	2	0	0	0	0	0	2	0	2	0	0	0
FBtr0070423	0.0376885	4.30536	0.348196	0.702216	0.371691	0.861407	0.376429	0.591375	0.899369	0.645749	0.831459	0.942295	2.06716	1.01725	1.41855	0.910661	0.364564	0.0755169	0.0581058	0.579035	0.951335	1.10099	0.684972	1.08697	0.579678	1.11259	0	0	0	0	0	0	0	0	0	0	0	0	0	0	0	0	0	0	0	0	0	0	0
FBtr0070424	0.00704138	0.00347193	0.0325599	0.0393964	0.0765906	0.0186991	0.0387481	0.0196041	0.0357427	0.055759	0.0285259	0.080373	0.0262403	0.0161819	0.191203	0.364982	0.249181	0.0440056	0.0822408	1.63457	1.04226	2.22039	0.619315	0.780655	0.741621	0.725862	0	0	0	0	0	0	0	0	0	0	0	0	0	0	0	0	0	0	0	0	0	0	0
FBtr0070425	0.500654	0.586563	0.824464	1.4561	1.82411	2.01815	1.31136	1.8845	1.36227	1.25955	1.07515	0.926499	1.05019	1.02538	1.63629	1.18058	1.68174	1.87924	1.43023	1.75599	0.324034	0.343267	0.400257	0.405981	0.51857	0.434614	0	0	0	0	0	0	0	0	0	0	0	0	0	0	0	0	0	0	0	0	0	0	0
FBtr0070428	0.556625	2.53818	0.504674	0.298507	0.407111	1.07176	0.95108	1.30714	0.437532	0.884422	0.0423345	0.113311	0.876915	0.778462	0.417104	0.738942	0.482334	0.144126	0.605541	0.456278	0.481163	0.860369	0.604755	0.836243	0.395094	0.712346	0	0	0	0	0	0	0	0	0	0	0	0	0	0	0	0	0	0	0	0	0	0	0
FBtr0070429	0.921476	0.650012	0.621265	0.83154	0.465343	0.244149	0.383296	0.176895	0.483945	0.648313	0.506432	0.49916	0.293285	0.733219	0.496928	0.654356	0.259428	0.356684	0.3021	0.3342	0.410704	0.435458	0.339594	0.50065	0.396855	0.664731	7	8	6	9	6	9	6	9	8	8	6	10	7	10	7	10	4	10	4	10	6	9	5
FBtr0070431	1.21253	1.44353	2.72558	1.39975	1.62068	1.85062	1.26394	1.999	0.989504	0.810048	0.837709	0.919085	0.910694	0.58003	1.03777	0.935342	1.74072	1.65083	1.52135	1.32107	0.405548	0.363475	0.473896	0.34062	0.412586	0.177673	0	1	0	1	0	1	0	1	0	1	0	1	0	1	0	1	0	2	0	2	0	1	0
FBtr0070432	0.342839	1.21071	0.788166	0.861347	0.976615	0.912899	0.895778	0.389965	0.64964	0.60388	0.688213	0.523098	0.771385	0.607631	0.654496	0.561519	0.336477	0.290636	0.320292	0.364123	0.368073	0.450678	0.308755	0.401449	0.376571	0.402316	6	6	5	7	7	6	6	7	7	5	5	7	6	4	4	6	7	4	4	7	7	5	5
FBtr0070433	1.37039	0.793878	0.80931	1.13272	1.53396	1.30791	1.47611	0.946715	1.01715	0.977548	1.25103	0.931073	0.698549	1.16444	0.909885	0.708405	0.629	0.44487	0.537724	0.564247	0.355871	0.303524	0.225947	0.177158	0.256191	0.213587	1	2	1	2	0	1	0	1	0	0	0	0	0	0	0	0	0	0	0	0	0	0	0
FBtr0070434	0.524778	0.471856	0.287535	0.384034	0.327735	0.269066	0.254841	0.375182	0.123867	0.272474	0.16349	0.196259	0.181691	0.332795	0.124323	0.278616	0.222152	0.354858	0.211869	0.392788	0.493212	0.239393	0.506505	0.304658	0.34726	0.221408	0	0	0	0	0	0	0	0	0	0	0	0	0	0	0	0	0	0	0	0	0	0	0
FBtr0070437	0.319003	10.7063	0.164658	18.4223	1.28423	0.972905	1.57379	1.16673	0.699289	0.722274	0.246051	0.201076	2.64027	3.01994	0.606515	0.692007	0.982276	1.03463	1.04147	0.732507	0.784388	1.59809	0.825959	1.40509	0.835969	1.0751	0	0	0	0	0	0	0	0	0	0	0	0	0	0	0	0	0	0	0	0	0	0	0
FBtr0070438	1.91377	1.77404	0.967207	0.974022	0.968281	0.638067	0.647411	0.507532	0.652865	0.612576	0.916635	0.625331	0.557371	0.612839	0.671735	0.657588	0.837648	0.892237	1.00849	0.881997	0.422924	0.451017	0.461409	0.557838	0.487145	0.584305	0	0	0	0	0	0	0	0	0	0	0	0	0	0	0	0	0	0	0	0	0	0	0
FBtr0070439	0.500417	0.676206	0.740438	0.63938	0.614793	0.48157	0.874541	0.492655	0.55059	0.686333	0.639506	0.773156	0.492494	0.555291	0.538517	0.475469	0.344537	0.32534	0.323298	0.343386	0.297725	0.272734	0.207761	0.184733	0.236202	0.174312	5	8	5	8	5	8	5	8	5	8	5	8	7	8	7	8	6	8	6	8	7	8	7
FBtr0070441	0.0282935	0.125432	0.310005	0.423578	0.999039	0.633423	0.987501	0.411402	0.554329	0.520034	0.502849	0.635862	0.35964	0.442129	0.540892	0.447152	0.761863	0.482133	0.628192	0.539425	0.528662	0.309407	0.675059	0.414256	0.842263	0.523533	0	0	0	0	0	0	0	0	0	0	0	0	0	0	0	0	0	0	0	0	0	0	0
FBtr0070442	0.565885	0.0425404	0.30371	0.204973	0.404878	0.371718	0.672032	0.291623	0.571931	0.467241	0.180823	0.285774	0.562718	0.279448	0.382511	0.200833	0.465147	0.304716	0.599456	0.242166	0.32356	0.415981	0.414053	0.524089	0.337245	0.61912	3	0	0	3	2	3	2	3	2	3	2	3	2	3	2	3	3	3	2	4	2	3	2
FBtr0070445	3.03061	2.12034	1.42174	1.23642	1.80663	1.09312	1.4297	0.861048	0.804937	0.898175	0.987889	1.0271	0.714554	0.87286	0.811856	0.459485	1.09326	0.945326	1.43114	0.618943	0.507119	0.441951	0.502642	0.388105	0.395629	0.414674	2	3	1	4	2	3	1	4	1	3	0	4	1	3	0	4	2	3	1	4	2	2	1
FBtr0070446	0.74039	0.44451	0.716791	0.546894	0.699365	0.699212	0.636418	0.361688	0.385546	0.458174	0.324598	0.42534	0.488872	0.398674	0.564729	0.63673	0.496328	0.425656	0.621477	0.466358	0.249633	0.222277	0.31097	0.243076	0.0637491	0.283359	0	0	0	0	0	0	0	0	0	0	0	0	0	0	0	0	0	0	0	0	0	0	0
FBtr0070447	0.0470152	0.0512591	0.40931	0.289321	0.66987	0.541425	0.624396	0.362258	0.251704	0.354277	0.396405	0.209425	0.346952	0.333249	0.604351	0.382803	0.515727	0.332438	0.647446	0.319304	0.444826	0.394963	0.581125	0.54589	0.649233	0.652678	0	0	0	0	2	2	2	2	2	2	2	2	2	2	2	2	2	2	2	2	2	2	2
FBtr0070448	0.564098	0.411101	0.347915	0.906693	1.61967	0.967019	1.04899	0.466541	0.483171	0.587188	0.324873	0.350693	0.557287	1.03108	0.122827	0.115366	0.725817	0.454768	0.656177	0.597613	0.658437	0.50162	0.694912	0.426122	0.631161	0.420854	1	2	1	2	2	2	2	2	1	2	1	2	1	0	0	1	0	2	0	2	2	2	2
FBtr0070460	1.38977	2.49206	2.14178	2.38283	2.19501	0.987233	0.533431	0.0879151	0.0347512	0.0109589	0.0630042	0.0054596	0.355945	0.267684	0.0723817	0.0434796	0.0389489	0.0163428	0.0122814	0.00541385	1.29769	1.58537	0.933259	1.18456	0.498298	0.778189	0	0	0	0	0	0	0	0	0	0	0	0	0	0	0	0	0	0	0	0	0	0	0
FBtr0070461	0.101755	1.02426	0.189686	0.836986	0.142031	0.543107	0.517013	0.329614	0.0517275	2.73468	0.418541	3.11842	0.558933	2.23101	1.39106	1.73439	0.295467	0.531573	0.141199	0.411397	1.04205	0.764533	0.790611	0.830671	0.798316	0.450648	0	0	0	0	0	0	0	0	0	0	0	0	0	0	0	0	0	0	0	0	1	0	0
FBtr0070462	0.240353	2.89137	0.383498	0.887564	0.880078	0.991316	0.760439	0.169677	0.283107	0.235049	0.441951	0.223219	1.62968	9.3557	0.102622	1	3.50032	0.131357	1	0.139115	1.09915	1.77914	0.526199	1.1559	0.535616	0.941815	0	0	0	0	0	0	0	0	0	0	0	0	0	0	0	0	0	0	0	0	0	0	0
FBtr0070477	0.117747	0.0327494	0.194839	0.207671	0.435898	0.645424	0.985666	0.306108	1.36948	0.709548	0.911418	0.626867	3.08936	1.89681	1.13362	0.419554	0.621588	0.347755	0.435309	0.433017	0.927226	0.911936	0.742018	0.658889	0.904739	0.864927	0	0	0	0	0	0	0	0	0	0	0	0	0	0	0	0	0	0	0	0	0	0	0
FBtr0070478	0.149197	0.0939951	1.16039	1.26779	1.90497	1.32749	1.15111	1.2984	0.551104	0.963004	0.758027	0.73378	0.647245	0.563307	0.619794	1.41596	0.979337	1.49412	0.967221	1.09217	0.530145	0.432803	0.640318	0.504992	0.66028	0.604305	0	0	0	0	0	0	0	0	0	0	0	0	0	0	0	0	0	0	0	0	0	0	0
FBtr0070479	0.351399	0.405967	0.924931	0.747532	1.20182	0.785421	0.994383	0.774878	0.677788	0.585621	0.683867	0.49891	0.969585	0.6023	0.832818	0.682891	0.888901	1.03447	0.931026	0.851225	0.272688	0.261806	0.369991	0.252988	0.41931	0.268783	1	1	1	1	1	1	1	1	1	1	1	1	1	1	1	1	1	1	1	1	1	1	1
FBtr0070480	0.88895	0.157692	0.134986	0.0610411	0.39799	0.214402	1.16478	0.739595	3.41535	0.68529	0.309838	0.0381387	1.96193	1.38369	0.993424	1.1147	0.726195	0.380378	0.4729	0.392979	0.940291	0.883961	1.15988	0.994014	0.720237	1.03781	0	0	0	0	0	0	0	0	0	0	0	0	0	0	0	0	0	0	0	0	0	0	0
FBtr0070481	0.538409	0.674705	0.266564	0.213998	0.400882	0.278675	0.537682	0.668269	0.293274	0.404299	0.26132	0.321941	0.139584	0.382619	0.438534	0.435541	0.414973	0.520057	0.558946	0.650613	0.366379	0.367205	0.340033	0.466634	0.298446	0.537991	0	0	0	0	0	0	0	0	0	0	0	0	0	0	0	0	0	0	0	0	0	0	0
FBtr0070484	0.916587	0.607572	1.0772	0.6062	0.842206	0.416943	1.2978	0.216046	1.97825	0.50493	0.856685	0.404384	1.25582	0.89471	0.917499	0.346009	0.407051	0.144011	0.847517	0.465224	0.397278	0.464217	0.374825	0.322357	0.195152	0.404262	0	0	0	0	0	0	0	0	0	0	0	0	0	0	0	0	0	0	0	0	0	0	0
FBtr0070485	0.0310582	0.0176076	0.291104	0.0346289	0.131365	0.0202456	0.259542	0.0247696	0.647817	0.0336756	0.605637	0.181078	0.23772	0.490028	0.198525	0.364554	0.0813456	0.0761112	0.211198	0.227506	0.759812	1.13563	0.762465	1.22325	0.673209	0.307913	0	0	0	0	0	0	0	0	0	0	0	0	0	0	0	0	0	0	0	0	0	0	0
FBtr0070486	0.0530125	0.0465025	20.5778	0.0345759	0.425595	0.258035	0.640539	0.167534	0.139095	0.0449303	0.554727	0.174241	0.641803	0.127471	0.267659	0.124962	0.48449	0.0100605	1.08267	2.5961	2.55888	2.20406	2.21235	0.76289	1.86299	0.838446	0	0	0	0	0	0	0	0	0	0	0	0	0	0	0	0	0	0	0	0	0	0	0
FBtr0070487	0.371404	0.232452	0.4408	0.50246	0.650137	0.817039	0.625743	0.680071	0.481494	0.544819	0.226326	0.367791	0.515014	0.494021	0.403196	0.501678	0.261592	0.561706	0.258067	0.632425	0.352003	0.302407	0.3416	0.400709	0.262785	0.452268	0	0	0	0	0	0	0	0	0	0	0	0	0	0	0	0	0	0	0	0	0	0	0
FBtr0070488	0.0455974	0.086609	0.466386	0.965556	0.725407	1.25319	0.552265	1.17343	0.240292	0.760533	0.195284	0.550388	0.235142	0.756641	0.278423	0.864415	0.434679	0.638596	0.509067	0.489989	0.551693	0.453474	0.683627	0.544598	0.645325	0.616253	0	0	0	0	0	0	0	0	0	0	0	0	0	0	0	0	0	0	0	0	0	0	0
FBtr0070489	1.03335	1	0.276266	1	0.246626	1	1	5.34509	0.120896	0.0583468	0.0618176	0.0298093	0.025969	4.52405	0.286747	0.239789	0.109804	0.0962538	0.0922592	0.581187	1.15369	1.38421	0.966398	1.41298	0.682896	1.04135	0	0	0	0	0	0	0	0	0	0	0	0	0	0	0	0	0	0	0	0	1	0	0
FBtr0070490	0.187969	0.566572	0.419798	0.731323	1.11184	0.89561	1.26933	0.845536	0.982231	0.779984	0.820762	1.81652	1.76955	1.72609	1.24412	1.07471	1.22148	0.531042	1.27489	0.620651	0.443743	0.477893	0.522379	0.473218	0.702013	0.192158	0	0	0	0	0	0	0	0	0	0	0	0	0	0	0	0	0	0	0	0	0	0	0
FBtr0070491	0.0635564	0.307175	0.588249	0.878584	1.47091	1.77922	1.39848	1.98159	1.01764	0.993385	0.793388	0.749395	1.42649	1.23251	1.26036	0.996736	1.37752	1.44814	1.15967	1.23602	0.430276	0.424373	0.594501	0.574201	0.767576	0.633542	0	1	0	1	0	1	0	1	0	1	0	1	0	1	0	1	0	1	0	1	0	1	0
FBtr0070494	0.263877	0.144615	0.530989	1.3971	2.04051	2.30358	0.948962	2.21474	0.699843	0.71354	0.426553	1.32083	1.52467	0.961577	0.814553	0.935076	0.828168	0.895223	0.863606	0.714435	0.59082	0.581195	0.785828	0.621785	0.826772	0.66043	0	0	0	0	3	0	0	3	1	3	1	3	4	5	2	7	5	5	3	7	6	3	3
FBtr0070495	0.529242	0.153832	0.500395	0.274439	0.282019	0.145151	0.160844	0.139944	0.215279	0.340402	0.27123	0.223657	0.128799	0.328796	0.392943	0.283176	0.291108	0.240956	0.350449	0.213137	0.426339	0.312012	0.466887	0.384812	0.480422	0.36066	1	1	1	1	0	1	0	1	0	1	0	1	0	1	0	1	1	1	1	1	0	1	0
FBtr0070497	0.0445616	0.0868817	0.427883	0.405511	1.04875	0.724211	1.00331	1.01767	0.448535	0.501214	0.475498	0.277728	0.567963	0.574086	0.430457	0.414434	0.705646	0.490373	0.79442	0.51444	0.50727	0.498396	0.667888	0.658747	0.76444	0.719188	0	0	0	0	0	0	0	0	0	0	0	0	0	0	0	0	0	0	0	0	0	0	0
FBtr0070498	0.47745	0.578278	0.394974	0.567336	0.54497	0.460499	0.544374	0.480001	0.425209	0.583095	0.284678	0.614497	0.402515	0.55448	0.318714	0.350957	0.36696	0.388364	0.358498	0.465485	0.213908	0.17648	0.223498	0.113291	0.144968	0.114876	1	0	0	2	2	0	0	2	0	0	0	2	2	0	0	2	2	0	0	2	2	0	0
FBtr0070499	2.45757	1.39956	1.09708	0.952501	1.08904	0.601504	0.824323	0.568145	1.69387	1.15169	1.01964	1.09833	0.665294	1.11498	1.08128	1.09156	1.05297	0.916649	0.876539	1.17497	0.43967	0.256099	0.447458	0.338835	0.539873	0.439904	0	0	0	0	0	0	0	0	0	0	0	0	0	0	0	0	0	0	0	0	0	0	0
FBtr0070502	0.248803	0.150719	0.46744	0.589296	0.971581	0.733482	1.02185	0.779825	0.828057	1.04104	0.289574	0.524573	0.691067	0.978717	0.571338	0.60503	0.531508	0.475767	0.462696	0.436236	0.437379	0.418361	0.541569	0.468361	0.560803	0.509096	0	0	0	0	0	0	0	0	0	0	0	0	0	0	0	0	0	0	0	0	0	0	0
FBtr0070504	0.113629	0.45711	0.0129429	0.0993248	0.0946513	0.325364	1.1759	1.09813	0.196707	0.0764476	0.626901	0.235491	2.25175	0.296722	0.503924	0.615942	1.32942	2.72302	1.27475	0.832163	0.964044	1.16664	1.21704	0.990973	1.5827	0.865452	0	0	0	0	0	0	0	0	0	0	0	0	0	0	0	0	0	0	0	0	0	0	0
FBtr0070505	0.148121	1	1	0.050001	1	0.0321248	0.0618186	0.470249	0.0805473	0.0246831	0.0316689	0.00721122	1.68042	0.630201	0.246539	0.492329	0.850075	0.0347898	0.0179808	1.38595	1.13244	1.16563	1.23078	1.52152	0.937484	1.17346	0	0	0	0	0	0	0	0	0	0	0	0	0	0	0	0	0	0	0	0	0	0	0
FBtr0070506	0.0524205	7.3408	0.98307	0.145677	0.564377	0.64453	0.560258	0.41218	0.0154516	0.256924	0.281785	0.183531	0.13304	1	0.421464	0.0399557	0.323479	0.60119	0.352896	0.247906	0.780297	2.03815	0.896976	1.91584	0.705163	1.62749	0	0	0	0	0	0	0	0	0	0	0	0	0	0	0	0	0	0	0	0	0	0	0
FBtr0070507	2.77868	0.83359	1.3269	1.75584	3.33795	1.69286	3.54587	0.809238	1.99443	2.32215	3.15331	1.96821	1.37812	4.6106	1.50192	1.15383	1.58729	1.41088	2.56259	1.64156	0.372097	0.599686	0.320567	0.393687	0.364296	0.410124	6	5	5	6	7	6	6	7	6	6	5	7	7	6	6	7	7	6	6	7	7	6	6
FBtr0070508	0.586814	0.453783	1.37462	0.392672	1.28342	1.3951	1.1826	1.54103	0.6407	0.421057	0.701187	0.648454	1.29214	0.613549	0.403414	0.336964	1.13816	0.819505	0.975631	0.646276	0.362702	0.575595	0.3704	0.643772	0.321141	0.641555	1	1	1	1	1	1	1	1	1	1	1	1	1	1	1	1	2	3	1	4	2	1	1
FBtr0070509	0.225939	0.295262	0.0849071	0.311922	0.371565	0.347588	0.594724	0.521722	0.528058	1.76892	0.503667	0.779638	0.646508	1.31928	0.625035	0.711407	0.207596	0.251117	0.149215	0.288105	0.539703	0.776091	0.511971	0.846989	0.681998	0.281877	0	2	0	3	1	2	1	2	0	3	0	4	3	3	2	4	2	2	2	2	2	2	1
FBtr0070523	1	1	0.0729374	1	0.118898	1	0.131016	4.05214	11.4724	28.6976	1	1	1	1	1	1	1	1	1	1	1.9284	2.13609	1.9638	1.81642	1.3513	0.865593	0	0	0	0	0	0	0	0	0	0	0	0	0	0	0	0	0	0	0	0	0	0	0
FBtr0070525	0.638087	0.763637	1.67484	2.40873	6.2363	3.47441	7.31224	3.57932	2.77541	4.81834	4.13332	3.28569	1.32235	5.02592	2.62089	3.83107	2.10328	1.23611	0.921056	1.47399	0.758716	0.492763	0.686585	0.445972	0.832282	0.511249	1	1	1	1	1	1	1	1	1	1	1	1	1	1	1	1	1	1	1	1	1	1	1
FBtr0070526	0.141439	1	0.284944	0.103426	0.462737	0.127012	0.788146	1	0.0472641	0.092975	0.0106514	0.0923612	0.0365374	0.102797	0.0926246	0.193534	0.0617322	0.191589	1	0.0595435	1.19282	1.25978	1.0223	1.14967	0.664897	0.916267	0	0	0	0	0	0	0	0	0	0	0	0	0	0	0	0	0	0	0	0	0	0	0
FBtr0070527	0.367717	3.78615	1.17092	0.464126	1.4457	1.00674	1.19634	0.412308	0.819875	0.716574	0.798377	0.875779	1.26986	1.06862	0.27314	0.125339	0.692808	0.448374	1.87824	0.525353	0.49936	1.10426	0.396039	1.05978	0.448102	1.13025	0	1	0	1	3	3	2	4	1	3	1	4	3	3	2	4	3	3	2	4	3	3	2
FBtr0070531	0.304071	1	1.82939	6.57857	1.31149	3.14727	2.61427	1.58144	0.0506087	0.0256267	0.0621756	0.0250298	0.478412	2.40608	0.403143	0.551208	1.34611	1	3.30213	4.59183	0.962386	1.02279	1.03348	1.21345	0.639471	0.813968	0	0	0	0	0	0	0	0	0	0	0	0	0	0	0	0	0	0	0	0	0	0	0
FBtr0070532	1.03607	1	0.0161057	1	1.02868	0.0493463	0.756511	1	0.114181	0.00272963	0.00820209	0.0126587	0.25747	0.0392723	0.189216	0.129485	1	0.0779619	0.0357233	0.567132	1.01991	1.16713	1.01654	1.04961	0.676845	0.623513	0	0	0	0	0	0	0	0	0	0	0	0	0	0	0	0	0	0	0	0	0	0	0
FBtr0070534	0.364807	4.91262	2.52497	1.33039	1.12669	1	1.88095	0.0732405	0.0879588	0.0177995	0.074965	0.00599594	1.7682	2.331	0.174007	0.17905	1	0.04187	0.611332	1.10959	0.891901	1.40505	1.01043	1.54796	0.633983	1.16095	0	0	0	0	4	0	0	4	4	0	0	4	5	0	0	5	0	0	0	0	0	0	0
FBtr0070536	0.137992	0.240771	0.665671	0.109089	1.3379	0.931278	1.22846	0.89925	0.00360864	0.0969309	0.073238	0.0362754	0.0889965	0.0636471	0.131964	0.173777	0.043242	0.0864986	0.646159	1.10378	1.16342	1.1329	1.04049	1.07829	0.658004	0.790681	0	0	0	0	0	0	0	0	0	0	0	0	0	0	0	0	0	0	0	0	0	0	0
FBtr0070537	0.399745	60.7311	34.6671	0.563834	0.296876	14.2035	2.37469	4.34182	2.19584	2.25545	2.13611	28.8764	0.123451	37.7849	6.02571	1	0.0753136	1	1	0.587628	2.15051	1.37327	1.93677	1.2554	1.78585	1.39189	0	0	0	0	0	0	0	0	0	0	0	0	0	0	0	0	0	2	0	2	0	0	0
FBtr0070538	1	1	1	1	1	0.0365463	1	105.854	1	1	1.42413	9.35113	1	1	0.0361194	1	1	1	1	1	0.366144	2.70015	0.161718	2.14872	0	1.94974	0	0	0	0	0	0	0	0	0	0	0	0	0	0	0	0	0	0	0	0	0	0	0
FBtr0070539	0.0977202	1	0.176394	1	6.63787	0.067053	0.0640252	1	2.29914	109.157	2.72331	20.6297	1	1	1	1	1	1	1	0.0588706	1.23639	2.51308	1.28108	1.95842	1.87094	0.608367	0	0	0	0	0	0	0	0	0	0	0	0	0	0	0	0	0	0	0	0	0	0	0
FBtr0070540	1	1	0.0760573	1	0.123722	1	0.0731085	68.533	4.97021	1	0.0607136	1	1	1	1	1	1	1	1	1	1.41443	2.75442	1.86078	2.24962	1.43017	1.88816	0	0	0	0	0	0	0	0	0	0	0	0	0	0	0	0	0	0	0	0	0	0	0
FBtr0070541	1.04365	11.8544	0.815936	1.3342	0.274863	19.9322	1.38982	2.07244	1.06734	1	1.34803	1	1	1	1	14.404	1	1	1	1	0.307152	1.307	0.413703	1.28112	0.531139	1.00435	0	0	0	0	0	0	0	0	0	0	0	0	0	0	0	0	0	0	0	0	0	0	0
FBtr0070542	0.0944092	1	0.618203	1	0.0429355	1	0.0828054	1	0.116986	1	0.129403	0.00688482	3.33154	0.204327	0.660533	1	1.40865	1	0.0526367	1	1.58607	0.462746	1.19687	0.485856	1.30399	0	0	0	0	0	0	0	0	0	0	0	0	0	0	0	0	0	0	0	0	0	1	0	0
FBtr0070543	1.09949	6.3429	2.23973	4.1148	1.76006	2.68881	1.62099	3.66291	1.45331	1.53292	0.837118	1.64993	2.71612	1.68477	2.33739	2.15958	2.94764	4.31421	2.97039	2.98954	0.379923	0.49009	0.330458	0.541333	0.279219	0.367917	0	0	0	0	0	0	0	0	0	0	0	0	0	0	0	0	0	0	0	0	0	0	0
FBtr0070546	0.144901	0.44264	6.0647	0.682344	0.223227	0.262218	0.138334	1	2.33208	0.933673	1.23218	1.17303	0.210673	0.0595155	1.10124	0.757162	0.0977034	1	0.21672	0.586289	1.58573	0.516468	1.36814	0.46717	1.79462	0.534793	0	0	0	0	0	0	0	0	0	0	0	0	0	0	0	0	0	0	0	0	0	0	0
FBtr0070550	0.303964	0.598995	0.815622	0.490771	0.578041	0.781403	1.41555	62.1113	3.60476	0.875718	2.10806	22.1611	0.149005	0.0293424	1.81271	1	0.0609371	0.102846	0.138233	1	1.0419	2.23029	0.835404	1.71376	0.608369	1.92203	0	0	0	0	0	0	0	0	0	0	0	0	0	0	0	0	0	0	0	0	0	0	0
FBtr0070551	0.155541	0.0888511	1	1	1	0.0582829	0.258712	1	0.0245337	0.0645869	0.00526855	0.0604092	0.0635308	0.0464736	0.213299	0.172252	0.105305	1	0.0884072	1	1.30934	1.05863	1.14947	1.2712	0.761642	0.996718	0	0	0	0	0	0	0	0	0	0	0	0	0	0	0	0	0	0	0	0	0	0	0
FBtr0070552	1	0.179807	5.14147	0.0109979	0.145703	0.595616	0.622993	38.6457	0.0353259	0.0877084	0.136185	0.0458925	0.0425576	1	0.285072	0.113324	0.0410824	1	1	1	1.84207	2.83195	1.67343	2.38136	1.3329	1.94698	0	0	0	0	0	0	0	0	0	0	0	0	0	0	0	0	0	0	0	0	0	0	0
FBtr0070553	0.302268	0.268067	16.8487	0.0590219	0.268655	0.939821	0.170272	14.4629	0.105793	0.167161	0.795503	0.157828	0.923809	1.19717	0.0867367	1	0.0441032	0.176138	1	0.221518	2.53615	2.38408	2.18983	2.1613	1.88768	1.78778	0	0	0	0	0	0	0	0	0	0	0	0	0	0	0	0	0	0	0	0	0	0	0
FBtr0070554	0.307503	0.0597907	0.699066	0.352199	0.0359847	0.715542	0.304579	257.444	0.788019	1	0.214716	0.148405	0.152913	1	1	1	0.0273604	0.0925868	0.0443032	0.0983141	0.974865	3.10239	0.743611	2.42375	0.810676	1.98838	0	0	0	0	0	0	0	0	0	0	0	0	0	0	0	0	0	0	0	0	0	0	0
FBtr0070555	5.81366	0.0701789	0.875375	0.0291977	0.840196	1	0.0933457	1.98248	19.6872	1.10708	0.144381	0.135031	0.04583	11.2247	0.8563	0.121473	7.00078	1	1.15186	1	1.68518	1.91419	1.68511	1.0862	1.38021	1.19933	0	0	0	0	0	0	0	0	0	0	0	0	0	0	0	0	0	0	0	0	0	0	0
FBtr0070556	0.248397	0.0750817	1.24552	0.0209858	0.263428	1.52226	2.51601	158.597	17.1145	21.1127	0.148963	0.0770202	0.320661	1.19662	0.345561	1	1.9471	0.233229	0.410186	0.612116	2.1235	2.69279	1.86318	2.09794	1.00339	1.97314	0	0	0	0	0	0	0	0	0	0	0	0	0	0	0	0	0	0	0	0	0	0	0
FBtr0070557	0.0989182	0.0246856	1	1	0.558827	1.36756	2.90969	45.9374	2.00061	1	1	1.60757	0.108177	1	1	0.0646641	0.0655503	1	1	1	0.92554	2.63917	0.811992	2.1619	1.08125	1.86859	0	0	0	0	0	0	0	0	0	0	0	0	0	0	0	0	0	0	0	0	0	0	0
FBtr0070558	0.154037	0.899927	2.20359	0.915323	1.52602	2.11494	2.17268	2.91617	1.68464	1.59747	1.2555	1.33539	2.02233	2.18301	2.5117	1.68611	1.98815	2.31886	2.28603	2.5536	0.384574	0.367276	0.503848	0.476913	0.633387	0.57508	0	0	0	0	0	0	0	0	0	0	0	0	0	0	0	0	0	0	0	0	0	0	0
FBtr0070559	0.373255	0.26978	0.47953	0.363	1.22757	0.673156	1.65304	0.522967	1.53267	1.42702	1.63904	1.04578	0.445451	1.77193	0.897529	0.74486	0.625703	0.427477	0.544043	0.331685	0.555828	0.66806	0.506295	0.616592	0.655862	0.38912	11	8	3	18	16	5	2	19	4	3	3	5	3	3	3	3	1	1	0	2	3	2	2
FBtr0070561	0.11517	1	1	1	2.58256	0.533793	0.621217	433.211	2.58412	1	1.01375	0.508663	1	1	1	1	0.0587176	1	1	1	0.787961	3.09824	0.782356	2.42232	0.986755	1.98449	0	0	0	0	0	0	0	0	0	0	0	0	0	0	0	0	0	0	0	0	0	0	0
FBtr0070562	0.546742	1.23033	0.723227	1.07766	2.58998	1.87245	2.75293	0.94926	0.940617	1.16969	2.10786	0.864135	1.92005	0.476133	0.987484	0.566558	1.04783	0.708002	1.09016	0.652127	0.543742	0.429571	0.6135	0.3007	0.713661	0.319539	2	4	1	5	3	4	2	5	3	4	2	5	3	4	2	5	2	4	1	5	2	4	1
FBtr0070563	1	0.0251606	0.277789	0.166427	0.163914	0.261154	0.436643	40.2053	7.23082	4.51432	2.01206	4.03943	1	1.19765	1	1	0.11055	0.0403126	1	0.063084	1.48845	2.41282	1.46791	1.92747	0.789792	1.97033	0	0	0	0	0	0	0	0	0	0	0	0	0	0	0	0	0	0	0	0	0	0	0
FBtr0070564	0.968888	124.929	1.64515	0.702026	0.831623	2.08518	1.38851	2.11108	8.49458	4.15553	2.94493	9.00895	2.30844	2.15021	1.42951	0.337953	3.00451	1.91898	1.86217	2.29222	0.899495	2.58616	1.08067	2.08178	0.310527	1.8995	0	0	0	0	0	0	0	0	0	0	0	0	0	0	0	0	0	0	0	0	0	0	0
FBtr0070565	0.469744	6.16082	3.74173	1	1.18888	1.65328	1.64796	47.5193	7.90553	0.100345	0.615502	0.388483	0.210747	10.5347	1.76513	0.0690207	0.0231239	1.17374	0.0403887	4.93575	1.38308	1.97374	1.10119	1.98211	0.797936	1.59113	0	0	0	0	0	0	0	0	0	0	0	0	0	0	0	0	0	0	0	0	0	0	0
FBtr0070566	0.196056	0.0784879	0.325352	1	1.02513	11.932	1.40704	2.95396	0.88943	0.0551192	0.654202	2.95055	1	1	0.0965981	7.09273	0.49535	0.121744	1	0.0470531	0.599042	1.43785	0.603536	1.42038	0.779567	1.36002	0	0	0	0	0	0	0	0	0	0	0	0	0	0	0	0	0	0	0	0	0	0	0
FBtr0070567	1	1	0.872625	0.0256416	0.326977	8.00716	0.348591	0.83952	0.0943872	5.21614	0.478984	0.00590393	1	0.0946559	1	0.00446096	0.0574646	6.53387	0.0478332	0.103581	0.781532	1.433	0.668172	1.31901	0.548722	1.50614	0	0	0	0	0	0	0	0	0	0	0	0	0	0	0	0	0	0	0	0	0	0	0
FBtr0070568	0.696092	0.594753	1.40849	1.12927	0.589983	1.08122	0.925045	0.921694	0.659817	0.773875	0.726703	0.593928	1.49528	0.67732	1.97157	0.843208	1.30343	1.21546	1.0307	0.891608	0.418443	0.251567	0.363035	0.275239	0.401896	0.259235	1	1	1	1	1	1	1	1	0	1	0	1	1	1	1	1	1	1	1	1	1	1	1
FBtr0070569	0.107796	0.414705	0.34127	0.595521	0.570624	0.89701	0.460597	0.586501	0.388872	0.812239	0.441181	0.745198	0.264615	0.95865	0.230035	0.550891	0.529714	0.839899	0.480023	0.697159	0.381335	0.242396	0.405829	0.260726	0.535991	0.321544	0	1	0	1	1	1	1	1	1	1	1	1	1	1	1	1	1	1	1	1	1	1	1
FBtr0070570	0.0517014	1	0.139209	1	1	1	0.03006	1	0.0840608	0.158738	0.0922476	0.203231	0.0177519	1	0.497659	0.497064	8.97401	0.318986	1	0.583243	2.32415	0.536454	1.62169	0.582084	1.52524	0	0	0	0	0	0	0	0	0	0	0	0	0	0	0	0	0	0	0	0	0	0	0	0
FBtr0070575	0.0143423	0.181535	0.0639799	0.318718	0.10731	0.658771	1.25207	1.82539	0.157597	1.46729	0.210127	1.00484	0.761047	0.364902	0.970948	0.151967	1.0047	1.1965	1.396	1.01362	0.906276	0.70332	1.56529	0.712772	1.65906	1.00116	0	0	0	0	3	0	0	3	4	2	1	5	6	10	6	10	0	4	0	4	3	7	3
FBtr0070577	0.190783	1	0.104389	0.0321723	0.561583	1.36486	1.71322	2.22335	0.783197	0.994082	0.283374	1.79725	1.69925	0.688513	0.936953	0.490121	0.28676	0.624059	0.0202699	0.783457	0.949136	0.6454	0.986484	0.61331	1.15309	0.785573	0	0	0	0	0	0	0	0	0	0	0	0	0	0	0	0	0	0	0	0	0	0	0
FBtr0070583	0.422993	0.762003	2.37108	3.24442	3.53368	3.6852	2.67497	3.20326	2.52141	2.08619	3.06905	2.58795	1.63712	1.73209	2.10538	1.88118	2.30203	3.18008	2.20417	2.51882	0.366725	0.35665	0.440004	0.407815	0.583894	0.486789	1	0	0	1	3	1	1	3	3	1	1	3	3	1	1	3	3	1	1	3	3	1	1
FBtr0070586	1.68543	1.1607	1.98191	1.54813	2.52957	0.757667	1.3322	0.662742	1.37161	1.08521	1.50803	1.033	0.942002	0.761675	1.11044	1.01599	2.15306	1.27971	1.63501	1.22204	0.298903	0.258012	0.262969	0.302756	0.269196	0.393316	1	1	1	1	1	1	1	1	1	1	1	1	1	1	1	1	1	1	1	1	1	1	1
FBtr0070588	0.145856	0.14745	0.446649	0.473765	0.773358	1.57599	8.48575	11.4581	1.66748	1.76032	2.99754	2.06107	0.288874	0.774212	2.44166	0.331659	3.00896	5.2277	11.3819	9.04382	1.19731	1.21435	1.30009	1.46027	1.6336	1.58109	0	0	0	1	0	0	0	0	0	0	0	0	1	0	0	1	0	0	0	0	1	0	0
FBtr0070589	0.0386482	0.257323	0.0432024	0.249278	0.12147	0.958284	0.259809	0.406628	0.246163	0.128843	0.106322	0.101903	0.153008	3.22089	0.284523	0.259158	0.0700506	0.154659	1	0.933803	1.22343	1.42446	0.710533	0.904711	0.891923	0.715673	0	0	0	0	0	0	0	0	0	0	0	0	0	0	0	0	0	0	0	0	0	0	0
FBtr0070590	1.12271	1.14556	1.44293	0.902552	1.11194	0.797468	0.848797	1.20751	0.278664	0.274945	0.308463	0.283739	0.29017	0.305636	0.23286	0.27898	0.990849	0.795969	0.746245	0.583806	0.591534	0.554818	0.553899	0.53081	0.214875	0.192432	0	0	0	0	0	0	0	0	0	0	0	0	0	0	0	0	0	0	0	0	0	0	0
FBtr0070597	1.07642	0.866132	1.14607	1	0.626811	3.42696	0.721772	0.12369	0.164504	6.67416	0.262649	0.164712	0.534095	1	0.928468	1	0.945977	1	0.548147	1	0.476301	1.22446	0.606888	1.25863	0.287663	1.05937	0	0	0	0	0	0	0	0	0	0	0	0	0	0	0	0	0	0	0	0	0	0	0
FBtr0070599	0.00883983	1	0.168273	1	0.722097	1	0.190933	1	0.299007	1	0.00523501	1	0.0763114	0.0219131	0.206888	1	0.0107123	1	0.0622109	1	1.23684	0.34283	1.14115	0	1.13918	0	0	0	0	0	0	0	0	0	0	0	0	0	0	0	0	0	0	0	0	0	0	0	0
FBtr0070600	1.0066	0.866132	1.86598	1	0.600055	3.42696	0.844751	0.12369	0.259921	6.67416	0.353828	0.164712	0.505701	1	0.535837	1	1.1835	1	0.615641	1	0.613188	1.22446	0.711332	1.25863	0.509942	1.05937	0	0	0	0	0	0	0	0	0	0	0	0	0	0	0	0	0	0	0	0	0	0	0
FBtr0070605	0.193188	2.25554	0.105848	0.0621649	0.103731	0.0271116	0.340202	0.0579979	0.00947885	0.0395273	0.0518137	0.00456651	0.209223	0.208451	0.0364061	0.0263162	0.234313	0.21406	0.664795	0.127036	0.997098	2.28387	0.882656	2.22021	0.598081	1.83674	0	0	0	0	0	0	0	0	0	0	0	0	0	0	0	0	0	0	0	0	0	0	0
FBtr0070611	0.45344	1.30507	0.918176	1.01076	1.8872	1.68034	2.37106	2.15764	1.16023	2.56233	1.38258	2.8878	1.70139	2.17244	1.44927	1.47238	1.71623	1.99514	1.82962	1.64754	0.366208	0.305738	0.504127	0.37762	0.623218	0.322053	0	1	0	1	1	1	1	1	0	1	0	1	1	1	1	1	1	1	1	1	1	1	1
FBtr0070612	0.484523	2.82736	1.20115	1.27228	1.01861	1.09292	1.4984	1.46811	1.99014	1.17538	1.58792	1.47814	0.576624	1.82723	2.4808	1.55412	0.359667	0.844028	2.05996	0.293891	0.546534	0.478613	0.401056	0.414469	0.405539	0.474305	0	0	0	0	0	0	0	0	0	0	0	0	0	0	0	0	0	0	0	0	0	0	0
FBtr0070613	0.845279	1.29181	0.861794	2.04023	1.89008	0.520136	0.93019	0.587917	1.13952	1.32082	1.15244	1.1161	0.873953	1.15842	2.06331	1.17179	1.45166	1.58025	1.91207	1.58325	0.367431	0.36681	0.3455	0.486638	0.447794	0.64102	0	2	0	2	0	2	0	2	0	0	0	0	0	1	0	1	0	1	0	1	0	1	0
FBtr0070616	2.5152	2.17981	2.46615	2.79985	3.16186	3.3491	3.21338	2.72103	2.71303	3.76156	3.93589	3.52552	2.6766	4.00339	3.92953	2.61028	2.98643	2.4974	2.53524	2.24169	0.182874	0.217278	0.185535	0.193563	0.142095	0.173198	1	2	1	2	1	2	1	2	1	2	1	2	1	2	1	2	1	2	1	2	1	2	1
FBtr0070624	0.267512	1.59062	0.298408	0.645212	0.696033	0.930431	0.826115	0.751422	0.491503	0.624568	0.401219	3.72827	0.192059	1.58229	0.11172	0.217746	0.133942	0.260765	8.68412	0.0623207	2.17852	1.03857	0.44941	0.874575	0.539033	0.433036	0	0	0	0	0	0	0	0	0	0	0	0	0	0	0	0	0	0	0	0	0	0	0
FBtr0070625	0.117246	0.0531262	0.427044	0.274538	0.746796	0.724109	0.977202	0.788397	0.682531	0.645538	0.351338	0.212261	0.742436	0.712238	1.08673	0.685643	0.73202	0.472362	0.628451	0.547798	0.443693	0.491526	0.563359	0.683787	0.661749	0.771122	0	0	0	0	2	1	0	3	2	2	1	3	2	3	2	3	3	2	2	3	2	0	0
FBtr0070626	0.524346	0.396441	0.322398	0.848834	0.95576	1.14597	1.04559	0.765013	0.550579	0.59056	0.428805	0.497505	0.588064	0.829021	0.959046	0.521602	0.246361	0.249855	0.27619	0.31254	0.5048	0.453134	0.460262	0.384593	0.484961	0.391086	4	4	4	4	4	4	4	4	4	4	4	4	4	4	4	4	4	4	4	4	4	4	4
FBtr0070627	0.91918	0.317555	0.660687	0.28507	0.0972808	0.157908	0.281438	0.289565	0.274215	0.338726	0.318721	0.465567	0.105982	0.286747	0.232395	0.29623	0.206621	0.29423	0.234534	0.233933	0.775251	0.261711	0.714653	0.321118	0.755974	0.271249	2	2	2	2	2	3	2	3	2	2	2	2	2	2	2	2	2	2	2	2	2	2	2
FBtr0070638	0.437865	0.335781	0.587848	0.377187	0.764065	0.865273	0.735487	0.64106	0.42711	0.610933	0.468895	0.460214	0.42191	0.533522	0.354447	0.585789	0.599786	0.758291	0.546336	0.725971	0.257656	0.28592	0.264186	0.360292	0.238103	0.445579	0	2	0	2	0	0	0	0	0	2	0	2	0	0	0	0	0	2	0	2	0	0	0
FBtr0070639	3.35129	2.28134	3.07793	1.18518	3.26922	3.26221	3.17757	3.43697	3.6562	1.28781	2.83402	3.22456	2.37438	1.68204	3.81605	2.21714	3.00933	2.79416	2.78593	2.42272	0.134993	0.341028	0.0854715	0.417372	0.036599	0.408196	0	0	0	0	0	0	0	0	0	0	0	0	0	0	0	0	0	0	0	0	0	0	0
FBtr0070642	0.740294	0.385392	1.69963	1.27208	1.26205	2.01614	0.403224	0.851716	0.609036	0.745729	0.513081	0.837154	0.760199	0.508014	0.36439	0.527932	0.952777	1.68125	1.54297	1.37231	0.532462	0.533227	0.578978	0.554884	0.556611	0.61182	0	0	0	0	0	0	0	0	0	0	0	0	0	0	0	0	0	0	0	0	0	0	0
FBtr0070643	0.773383	0.362497	0.973745	0.947667	1.6017	2.43001	2.0113	1.58741	0.553527	0.621274	1.15365	1.05226	0.761506	1.45445	0.616008	1.24746	0.690387	1.05677	0.615457	1.47336	0.495589	0.467343	0.460318	0.638831	0.425283	0.665715	6	6	5	7	6	6	5	7	6	6	5	7	6	6	5	7	6	6	5	7	5	6	4
FBtr0070644	0.520737	0.223985	0.9123	0.32723	0.89786	0.603761	0.898724	0.829506	0.636553	0.548313	0.598235	0.473759	0.445317	0.444149	0.673854	0.45897	0.794618	0.709493	0.77384	0.455937	0.232038	0.346592	0.239343	0.426516	0.236841	0.552391	0	1	0	1	0	0	0	0	0	1	0	1	0	1	0	1	0	0	0	0	0	0	0
FBtr0070645	0.333449	0.707492	0.283216	2.12339	0.326829	2.04924	2.11959	4.23413	0.374253	0.32927	0.273667	0.593949	3.0023	5.50335	1.44813	0.950869	0.13074	1.52112	1.58637	0.293772	1.00619	0.957903	1.19044	0.878767	1.17897	0.63947	0	0	0	0	0	0	0	0	0	0	0	0	0	0	0	0	0	0	0	0	0	0	0
FBtr0070646	1	1	1	1	1	6.8247	0.174099	1	0.0757997	0.0883757	0.157587	0.00264343	0.619314	1	0.45036	0.213347	1	1	1	25.0572	0.620102	2.08535	0.835506	1.55917	0.5204	1.18573	0	0	0	0	0	0	0	0	0	0	0	0	0	0	0	0	0	0	0	0	0	0	0
FBtr0070647	0.0737053	0.212757	0.888181	3.09325	1	0.212611	1.06095	1	0.0253896	0.0271517	0.0258095	0.0132851	0.314768	0.0961033	0.137953	0.138826	0.102659	1	1	1.10265	0.994252	1.37961	1.0128	1.57877	0.609049	1.20449	0	0	0	0	0	0	0	0	0	0	0	0	0	0	0	0	0	0	0	0	0	0	0
FBtr0070648	0.327586	0.224946	0.936705	0.962961	2.22948	1.68696	1.58475	1.681	1.74683	1.36801	1.41161	0.886474	0.878521	1.01066	1.43894	0.883583	1.41864	1.03781	1.7583	1.11361	0.3916	0.393311	0.483499	0.494723	0.64613	0.612605	0	0	0	0	0	0	0	0	0	0	0	0	0	0	0	0	0	0	0	0	0	0	0
FBtr0070650	0.30662	0.183369	0.504715	0.390019	0.493706	0.429115	1.82238	1.10621	0.489816	0.964136	0.51979	1.06851	0.368134	1.27565	1.04194	0.0719727	2.19627	2.20852	2.00125	2.05843	0.763179	0.755875	0.812997	0.581825	0.894811	0.760268	3	3	2	4	5	3	3	5	3	3	3	3	4	5	4	5	4	4	4	4	4	4	4
FBtr0070652	0.435264	0.458157	0.14093	0.234751	0.689812	0.598803	0.703703	0.486894	0.633816	0.646742	0.589986	0.51567	0.655394	0.9676	1.02965	0.450758	0.547993	0.525583	0.483704	0.493823	0.38295	0.345735	0.403318	0.293153	0.53782	0.343012	1	1	1	1	1	0	0	1	1	1	1	1	1	1	1	1	1	1	1	1	1	1	1
FBtr0070654	1	0.0990184	0.110425	0.363807	0.210196	0.0989407	0.609248	0.499414	0.0139458	0.0218581	0.0369218	0.00992642	0.0816049	1.18904	0.163387	0.105994	1	0.151726	0.0522093	2.37654	1.19921	1.52833	1.19276	1.10571	0.843167	0.753369	0	0	0	0	0	0	0	0	0	0	0	0	0	0	0	0	0	0	0	0	0	0	0
FBtr0070655	4.4072	4.99085	5.60269	3.11768	4.36244	2.37188	4.40207	3.97764	6.09862	1.46633	2.06195	1.41561	2.98923	1.11747	4.66686	2.5197	4.24731	3.12802	3.32081	2.50783	0.28188	0.452923	0.311098	0.492214	0.129195	0.312075	0	0	0	0	0	0	0	0	0	0	0	0	0	0	0	0	0	0	0	0	0	0	0
FBtr0070656	1.31633	0.165484	0.688471	0.445103	0.9345	1.09584	0.854702	1.08185	0.653311	0.649893	0.559137	0.337223	0.586266	0.655768	0.503339	0.418186	0.66598	0.475263	0.683596	0.452055	0.321002	0.526019	0.327133	0.618475	0.280203	0.669372	0	0	0	0	0	2	0	4	0	0	0	0	0	0	0	0	0	1	0	2	0	0	0
FBtr0070657	0.0338128	1	0.00393903	1	0.00513436	0.0233969	0.0145217	0.222936	0.00176131	0.0646831	0.000674596	0.0483378	0.371944	1	0.25558	0.341902	0.00634881	0.00966195	0.00229801	0.148219	1.8956	1.12832	1.27038	1.20843	0.962234	0.913048	0	0	0	0	0	0	0	0	0	0	0	0	0	0	0	0	0	0	0	0	0	0	0
FBtr0070658	0.289856	0.228533	0.520961	0.0554165	1	0.372052	0.114181	0.178963	0.157829	0.134138	0.0845917	0.0676283	0.119758	0.142168	0.141417	0.225601	1	1	3.70008	0.89707	1.55391	1.0267	0.972896	0.680755	0.797636	0.627415	0	0	0	0	0	0	0	0	0	0	0	0	0	0	0	0	0	0	0	0	0	0	0
FBtr0070659	1	1	1	1	1	1	1	1	0.211006	0.0250053	0.0254613	0.0506678	0.0179875	1	0.2378	0.23697	0.0406493	0.0349161	0.0171571	1.64705	1.04473	0.808869	0.650221	0.731548	0	0	0	0	0	0	0	0	0	0	0	0	0	0	0	0	0	0	0	0	0	0	0	0	0
FBtr0070660	1	1	1	0.122713	0.111069	0.481078	0.1225	1	0.000988559	0.0012362	0.000272965	0.00971938	0.0391124	1.21151	0.127928	0.0787004	1	0.0476196	15.9584	1.10889	2.55511	1.01825	1.31248	1.07977	0.913239	0.658704	0	0	0	0	0	0	0	0	0	0	0	0	0	0	0	0	1	0	0	1	0	0	0
FBtr0070661	1	1	1	1	7.6836	1	0.0796584	1	0.0865557	0.00311229	0.0100744	0.00620402	0.014216	4.676	0.217827	0.576962	0.0551586	1	1	2.68021	2.10762	1.08142	1.82251	0.769198	1.44297	0	0	0	0	0	0	0	0	0	0	0	0	0	0	0	0	0	0	0	0	0	0	0	0
FBtr0070663	0.229377	1	1	0.044794	2.25098	0.829178	0.0448895	5.80343	1	1	0.103579	8.95126	1.24693	1.87333	0.759448	0.256285	1	38.266	1	0.0933423	0.753197	2.02504	1.09395	1.22433	1.13745	1.36639	0	0	0	0	0	0	0	0	0	0	0	0	0	0	0	0	0	0	0	0	0	0	0
FBtr0070664	0.183972	1	0.182281	1	0.160488	1	0.175999	1	0.15591	72.2133	0.148963	1	1.94447	2.98943	2.64598	1	1	0.059993	0.056027	1	1.37445	2.73446	0.0878401	2.25915	0.0608825	0	0	0	0	0	0	0	0	0	0	0	0	0	0	0	0	0	0	0	0	0	0	0	0
FBtr0070668	1.25577	0.667984	1.20231	1.02248	1.05142	0.586019	0.597202	0.403463	0.747897	0.5817	0.706888	0.694	0.583337	0.577088	0.944899	0.729752	1.01377	0.894533	0.67761	0.793959	0.282265	0.254839	0.300789	0.310875	0.291335	0.38763	5	6	4	7	5	5	3	7	3	2	1	4	2	5	0	7	1	3	1	4	2	3	2
FBtr0070669	1.03807	1.02953	0.706669	1.06094	1.37871	0.865479	1.23529	0.846778	1.1896	0.938671	0.908775	0.823039	1.30746	1.07135	1.05642	0.966007	1.34577	1.05145	1.15833	1.03898	0.185521	0.0985883	0.225978	0.107413	0.26708	0.115913	0	0	0	0	0	0	0	0	0	0	0	0	0	0	0	0	0	0	0	0	0	0	0
FBtr0070670	0.103191	0.128998	1.10698	0.187927	1.47515	1.29867	1.30023	0.849654	1.24224	0.884841	0.968296	0.97045	1.83765	1.27071	0.614112	0.738818	1.18577	1.14522	1.03294	0.834077	0.43407	0.482778	0.471399	0.643608	0.616384	0.908752	0	0	0	0	0	0	0	0	0	0	0	0	0	0	0	0	0	0	0	0	0	0	0
FBtr0070671	0.0617635	0.146215	0.238105	0.499356	0.622792	0.624856	0.626763	0.393124	0.339751	0.597414	0.442399	0.534749	0.4533	0.966528	0.709751	0.668861	0.660089	0.669211	0.607325	0.490508	0.441845	0.37842	0.571171	0.378983	0.731757	0.488604	1	2	1	2	2	2	2	2	2	2	2	2	2	2	2	2	2	1	1	2	2	2	2
FBtr0070674	0.23949	5.71073	0.695201	0.388299	1.65017	1.79908	2.04723	2.43639	1.34484	1.31404	1.48544	1.52427	2.88126	2.05418	2.21103	0.856284	1.40739	1.23271	1.39201	1.07042	0.485641	0.806669	0.53198	0.841487	0.720906	0.872243	0	0	0	0	0	0	0	0	0	0	0	0	0	0	0	0	1	0	0	1	1	0	0
FBtr0070675	1.07683	0.919699	1.1993	0.790157	1.25012	1.18755	1.33132	1.20699	0.838168	0.795101	1.11366	0.931575	1.31262	0.698874	0.900193	0.685975	1.41129	1.31678	1.6041	1.03384	0.192582	0.233001	0.151534	0.189962	0.0877937	0.19955	0	0	0	0	0	0	0	0	0	0	0	0	0	0	0	0	0	0	0	0	0	0	0
FBtr0070676	1.08664	0.95499	1.19857	1.40464	1.57486	0.926437	1.01215	1.26727	1.946	0.934865	1.12073	1.48918	1.5284	1.58605	1.19986	1.41298	1.76445	1.71426	1.5601	1.21358	0.22737	0.218035	0.274677	0.219888	0.205165	0.206682	0	0	0	0	0	0	0	0	0	0	0	0	0	0	0	0	0	0	0	0	0	0	0
FBtr0070677	0.531747	0.37598	1.09514	0.464615	0.591521	0.493729	0.800511	1.03362	0.411752	0.321328	0.709916	0.172955	0.629904	0.227286	0.952227	0.318359	0.82461	0.703395	0.793899	0.471126	0.276466	0.550364	0.348329	0.619833	0.337229	0.504491	0	0	0	0	0	0	0	0	0	0	0	0	0	0	0	0	0	0	0	0	0	0	0
FBtr0070678	1.54448	1.83687	2.08407	2.0362	1.59222	1.67683	0.940045	1.81014	0.854897	1.04421	1.16815	0.991718	1.08236	0.992112	1.36751	0.964686	2.28076	2.57255	1.75837	1.87127	0.325194	0.350808	0.340806	0.281032	0.304232	0.0806216	0	0	0	0	0	0	0	0	0	0	0	0	0	0	0	0	0	0	0	0	0	0	0
FBtr0070679	0.343612	0.982654	1.54047	28.6958	0.563138	0.933359	0.792581	130.307	4.08037	1.76711	1.24794	4.48795	0.421648	2.11959	0.28448	0.383754	0.113351	2.2122	0.626042	2.77624	1.16648	2.32128	0.960561	1.84205	0.642468	1.52769	0	0	0	0	0	0	0	0	0	0	0	0	0	0	0	0	0	0	0	0	0	0	0
FBtr0070680	0.222506	1.84787	0.22629	0.982692	1.042	0.856194	1.27273	0.891793	0.931047	0.872025	0.748596	0.82702	1.20244	3.84472	0.648997	1.77449	0.484386	0.348344	0.389564	0.430089	0.539914	0.811578	0.586534	0.378719	0.79149	0.412218	1	1	1	1	1	1	1	1	1	1	1	1	1	1	1	1	1	1	1	1	1	1	1
FBtr0070681	0.134596	3.89904	0.631097	1.44583	1.91779	1.72464	1.52289	0.643692	1.10246	1.38405	1.15259	1.24699	0.467568	6.08672	1.01372	0.509169	1.37978	0.764204	0.973583	1.11172	0.507199	0.935318	0.587154	0.652033	0.774518	0.721587	0	1	0	1	1	1	1	1	1	1	1	1	1	1	1	1	0	1	0	1	1	1	1
FBtr0070682	0.695089	1.9873	1.85174	2.58197	1.8522	3.26909	1.34625	3.05731	1.04726	1.25485	0.953985	1.25272	1.09128	1.58313	1.48801	1.59323	1.61434	2.49392	1.58526	2.13769	0.29082	0.338382	0.373153	0.392958	0.381987	0.208873	0	1	0	1	0	1	0	1	0	1	0	1	0	1	0	1	0	1	0	1	0	1	0
FBtr0070683	1.586	1.32057	0.858804	1.36495	0.968846	0.586896	0.666675	0.599122	0.936478	1.10518	0.866296	0.924004	1.00142	1.28643	1.31672	1.04021	1.31305	1.31648	1.27355	1.29423	0.260065	0.272375	0.320909	0.347065	0.389584	0.447653	1	1	1	1	1	1	1	1	1	1	1	1	1	1	1	1	0	1	0	1	0	1	0
FBtr0070685	0.662416	0.602603	0.552239	0.934594	0.8226	0.562476	0.840206	0.492857	0.597263	0.549511	0.386054	0.472604	0.31338	0.745145	0.198747	0.261003	0.329466	0.424688	0.269574	0.439945	0.464023	0.338056	0.267261	0.281296	0.190661	0.302843	5	5	5	5	5	5	5	5	5	5	5	5	5	5	5	5	5	5	5	5	5	5	5
FBtr0070686	0.193463	0.141505	0.600866	0.957705	1.65603	1.25983	1.36374	0.710349	0.602894	0.930841	0.569194	0.827925	0.907996	1.61177	0.449192	0.449349	0.480688	0.667044	0.558742	0.544947	0.606936	0.513829	0.668788	0.463561	0.707117	0.617563	1	0	0	1	1	1	1	1	1	1	1	1	1	1	1	1	1	1	1	1	1	1	1
FBtr0070688	0.267934	0.429349	0.990424	0.102137	0.391375	0.505834	0.791682	0.86704	0.346774	0.696681	0.268042	1.20929	2.17517	1.41492	1.01867	0.444465	0.750938	0.837054	0.706121	0.586423	0.738593	0.548618	0.600627	0.601833	0.553619	0.659499	0	0	0	0	1	0	0	1	0	0	0	0	1	1	1	1	1	1	1	1	1	1	1
FBtr0070689	0.259911	1	0.302919	1	0.61364	0.48089	0.971461	1.06768	0.446125	0.796287	0.6686	0.244087	1	1	0.700221	0.249009	0.0610643	0.179973	0.064845	0.663816	0.666183	0.531557	0.487595	0.435656	0.614076	0.3074	0	0	0	0	0	0	0	0	0	0	0	0	2	1	1	2	0	0	0	0	0	0	0
FBtr0070690	1.19377	1.01385	1.56939	1.20373	0.827902	0.315457	0.744748	0.866174	0.802337	1.16412	0.722592	0.564351	0.834175	0.896318	1.20904	1.07434	1.60416	1.78127	1.45784	1.41747	0.322419	0.401337	0.345453	0.411413	0.348592	0.449618	1	0	0	1	1	0	0	1	1	0	0	1	1	0	0	1	1	0	0	1	1	0	0
FBtr0070692	1	1	0.155623	1	0.719865	0.496441	0.211556	0.257864	0.00353895	0.00339612	0.00735887	0.00116108	1.75903	0.0891457	0.300835	0.521227	0.106434	0.6353	0.0893733	5.63009	1.30292	1.74405	1.18174	0.993965	0.781066	0.541056	0	0	0	0	0	0	0	0	0	0	0	0	0	0	0	0	0	0	0	0	0	0	0
FBtr0070693	0.392293	0.231495	0.220954	0.106596	0.202208	0.281251	0.603073	0.544706	0.413499	1	0.0308341	0.103769	0.192059	0.1916	0.059165	0.0854149	1	0.196868	0.328186	0.20757	0.83436	0.950703	0.645549	0.912187	0.525639	0.633643	0	0	0	0	0	0	0	0	0	0	0	0	0	0	0	0	0	0	0	0	0	0	0
FBtr0070697	0.254764	1	0.870482	13.772	0.224732	0.498444	0.139369	0.0466089	0.0585954	0.0368179	0.1959	0.212149	1.05478	4.36252	0.72283	1.43284	1	1	1	9.53904	0.74449	1.48613	1.00613	2.11531	0.901536	1.73399	0	0	0	0	0	0	0	0	0	0	0	0	0	0	0	0	0	0	0	0	0	0	0
FBtr0070698	1.69551	0.878373	2.45977	1.1173	1.22984	1.29579	0.94869	1.19247	0.984244	0.772844	1.22322	0.744887	1.38468	1.07998	0.984207	1.20251	1.79253	1.21544	1.43339	1.27969	0.331271	0.1909	0.402787	0.232218	0.417075	0.158363	0	0	0	0	0	0	0	0	0	0	0	0	0	0	0	0	0	0	0	0	0	0	0
FBtr0070699	0.305979	0.388075	0.7194	0.514026	0.922679	0.453959	0.835347	0.454221	0.581004	0.516692	0.665803	0.347608	0.385272	0.362467	0.507809	0.417086	0.846702	1.03352	0.642187	0.690643	0.314136	0.398915	0.322107	0.151461	0.392218	0.113683	0	0	0	0	0	0	0	0	0	0	0	0	0	0	0	0	0	0	0	0	0	0	0
FBtr0070701	0.122409	0.0277013	0.534343	0.436855	0.588849	0.47239	0.53044	0.283671	0.359368	0.357638	0.478445	0.650917	0.297158	0.536507	0.353381	0.475223	0.414922	0.411974	0.329256	0.389575	0.346427	0.410519	0.394881	0.562827	0.486594	0.662886	1	0	0	1	1	1	1	1	1	1	1	1	1	1	1	1	1	1	1	1	1	1	1
FBtr0070702	2.08778	1.33516	0.805157	0.950002	0.745036	0.452885	0.724748	0.458989	0.867955	0.856608	0.680201	0.777415	0.555468	0.662482	0.507403	0.499342	0.568477	0.421595	0.43265	0.453519	0.594052	0.432416	0.552332	0.411624	0.610269	0.533603	1	1	0	2	1	1	0	2	1	1	0	2	1	1	0	2	1	1	0	2	1	1	0
FBtr0070704	4.79334	1.52699	7.49133	1.20349	5.08421	0.760575	3.72269	1.14371	3.44316	0.822198	4.47689	0.807047	2.732	0.789773	3.68263	0.937711	4.88501	1.60389	5.08504	1.2736	0.28783	0.287375	0.298595	0.288735	0.301659	0.271263	0	0	0	0	0	1	0	1	1	1	1	1	1	0	0	1	0	0	0	0	1	1	1
FBtr0070711	0.736783	0.68711	0.673026	0.764364	1.22105	1.42376	1.54133	1.64795	1.14938	1.569	0.844143	1.13869	2.76461	1.70548	2.08078	1.4159	1.25237	1.18754	1.55207	1.02255	0.467803	0.284007	0.325707	0.340779	0.39556	0.422389	0	0	0	0	0	0	0	0	0	0	0	0	0	0	0	0	0	0	0	0	0	0	0
FBtr0070712	0.441693	0.157952	0.0235473	0.205944	0.0475998	0.368674	0.0772874	0.276143	0.0444635	0.041405	0.0168269	0.0158652	0.329781	0.82041	0.366803	0.411255	0.295495	0.17079	0.419627	0.944154	0.86586	0.916151	1.51583	0.763985	1.33758	0.363163	0	0	0	0	0	0	0	0	0	0	0	0	0	0	0	0	0	0	0	1	0	0	0
FBtr0070713	1.2308	0.673587	1.59338	0.299768	0.0568813	0.26025	0.511736	0.18959	0.807987	0.679593	0.373179	0.968078	0.322558	0.300408	0.496449	0.314418	0.738423	0.44724	0.859279	0.496186	0.649977	0.528526	0.747616	0.601945	0.817117	0.609067	10	0	0	10	10	0	0	10	0	7	0	9	9	11	5	16	7	5	2	11	5	7	1
FBtr0070715	0.414276	1	0.148817	1	0.166608	1	0.0873638	1	0.0245753	0.0521059	0.00892193	0.0106471	0.0465706	7.4488	0.101085	0.126104	0.0534745	0.163836	0.156974	0.17313	0.969754	1.87192	1.04282	0.738957	0.705275	0	0	0	0	0	0	0	0	0	0	0	0	0	0	0	0	0	0	0	0	0	0	0	0
FBtr0070716	0.259642	1	0.14776	0.0437095	0.0901851	1	0.14246	1	0.00863158	0.0682596	0.0758991	0.0248767	1	1	0.199446	0.317876	1	1	1	12.1087	1.08236	2.08665	0.702719	1.00021	0.445725	0.628372	0	0	0	0	0	0	0	0	0	0	0	0	0	0	0	0	0	0	0	0	0	0	0
FBtr0070717	0.0867052	1	0.0616574	0.697926	0.21982	0.176696	0.170432	0.0732405	0.139204	0.00240599	0.0451668	0.010257	0.199889	0.144578	0.0936074	0.409909	0.0615959	0.0243629	0.0108163	0.445016	0.643329	1.12842	0.562703	1.28623	0.545072	0.899144	0	0	0	0	0	0	0	0	0	0	0	0	0	0	0	0	0	0	0	0	0	0	0
FBtr0070721	0.016585	0.0148778	0.083321	0.0252959	0.068928	0.060196	0.146127	0.0949401	0.174418	0.252295	0.0476658	0.179921	0.127519	0.234472	0.111604	0.0598646	0.0966256	0.198159	0.244699	0.0463952	0.589576	0.774501	0.669324	0.895826	0.676863	0.744267	0	0	0	0	0	0	0	0	0	0	0	0	0	0	0	0	0	0	0	0	0	0	0
FBtr0070723	0.227422	0.174721	0.257642	0.225301	0.832681	0.634663	0.703854	0.758912	0.340253	0.587776	0.330364	0.565047	0.469583	0.530877	0.242369	0.34313	0.50771	0.542227	0.600776	0.439985	0.463259	0.383574	0.567125	0.480076	0.610018	0.651196	2	3	2	3	4	3	3	4	2	3	2	3	2	4	2	4	3	3	3	3	2	2	1
FBtr0070724	1.20744	1.04896	0.727362	1.17405	1.13056	1.03168	0.806144	0.747595	0.696773	1.04178	0.491204	1.08109	0.395899	0.716113	0.763441	0.581016	0.410528	0.359543	0.620884	0.330316	0.378786	0.381971	0.324934	0.140671	0.244396	0.180082	8	8	8	8	8	8	8	8	8	8	8	8	8	8	8	8	8	8	8	8	8	8	8
FBtr0070727	0.174997	0.129576	0.01546	0.0556813	0.0295399	0.129478	0.0921967	1	0.0571321	0.0320239	0.0386545	0.0461327	0.200614	0.0375763	0.24072	0.331237	0.120494	0.10805	0.0362641	1.63121	0.796563	1.53459	0.863885	1.63058	0.931876	1.36574	0	0	0	0	0	0	0	0	0	0	0	0	0	0	0	0	4	0	0	4	1	0	0
FBtr0070731	0.204199	1	0.155381	1	0.145594	1	0.142901	1	7.15492	1.11487	1.36657	2.82352	0.315921	0.0164303	2.06579	2.07066	0.18011	0.0113866	0.068444	0.573117	1.86633	0.805556	1.83108	0.556665	0.176689	0	0	0	0	0	0	0	0	0	0	0	0	0	0	0	0	0	1	0	0	1	1	3	0
FBtr0070734	1	1	1	1	1	0.302703	0.222084	1	0.316357	0.436064	0.195558	0.221016	0.338563	16.4259	0.313388	0.274146	3.16409	0.140763	1	2.52058	1.03894	2.14493	0.667902	0.573918	0.482865	0.422258	0	0	0	0	0	0	0	0	0	0	0	0	0	0	0	0	0	0	0	0	0	0	0
FBtr0070735	0.0401177	1	0.337057	0.573643	1.53131	5.64536	1.42716	1.11365	2.56514	0.661527	0.359097	0.634988	1.12409	0.615688	1.29116	0.154813	3.83691	0.0608902	0.107965	1	0.950267	1.41153	0.926788	1.2408	0.90675	1.14544	0	0	0	0	0	0	0	0	0	0	0	0	0	0	0	0	0	0	0	0	0	0	0
FBtr0070736	1	1	0.305556	1	0.418335	1	0.174099	1	0.0693736	0.0697205	0.0901509	0.0856083	3.10481	0.0985054	0.372856	0.432588	1	1	1	28.6918	1.2044	2.58404	1.01527	0.68777	0.767706	0	0	0	0	0	0	0	0	0	0	0	0	0	0	0	0	0	0	0	0	0	0	0	0
FBtr0070738	0.0315977	0.0377366	0.51364	0.965395	2.20198	2.09673	2.79615	0.883322	1.58649	1.39571	3.05077	0.953567	0.398762	0.725512	0.484894	1.12598	0.482061	0.440889	0.787957	0.59867	0.88772	0.605477	0.72094	0.640373	0.954543	0.848852	2	3	2	3	3	3	3	3	2	3	2	3	3	3	3	3	2	3	2	3	3	3	3
FBtr0070741	0.233709	0.270431	0.135841	0.27177	0.134852	0.0273008	0.268271	0.0720139	0.539122	0.126992	0.372952	0.101532	0.432609	0.327314	0.452117	0.506872	0.0171845	0.018262	0.037702	0.106681	0.692813	0.855795	0.55152	0.71133	0.35328	0.805268	0	0	0	0	0	0	0	0	0	0	0	0	0	0	0	0	0	0	0	0	0	0	0
FBtr0070742	0.053646	0.872949	0.300281	0.0793364	0.280365	0.143515	1.66862	0.322669	0.875981	1.23558	1.46581	0.571163	0.589136	2.08353	0.247347	0.220083	0.187979	0.150886	0.115174	0.155185	0.995277	1.11035	0.87162	0.837058	1.28035	1.01679	0	0	0	0	1	0	0	1	1	3	1	3	3	3	3	3	1	2	1	2	2	2	2
FBtr0070748	1.45901	1.10685	2.60042	2.01457	2.16329	1.78621	1.55835	1.7675	1.79838	1.05354	1.68861	1.07379	2.42992	0.985517	1.97955	1.30412	2.2702	2.00042	2.1424	1.55073	0.188464	0.27853	0.228807	0.296692	0.275704	0.234362	0	2	0	3	0	2	0	3	0	2	0	3	0	2	0	3	0	2	0	3	0	2	0
FBtr0070749	0.936678	0.470794	1.96765	0.175748	0.465773	0.0812705	0.199215	0.516747	0.152448	0.0756952	0.139464	0.107839	0.321738	0.761881	0.0196686	0.631164	0.109351	0.769437	0.441059	0.660395	1.23469	0.676102	1.11264	0.847846	0.873024	0.691654	0	0	0	0	0	0	0	0	0	0	0	0	0	0	0	0	0	0	0	0	0	0	0
FBtr0070750	0.311562	0.0220267	3.14536	0.0803126	0.453893	0.0815932	1	1	0.0979118	0.0387941	0.0298709	0.0356103	0.335698	1.21669	0.255696	0.46867	0.0532635	1	0.350366	3.00343	1.54985	1.34952	1.40653	1.84975	1.069	1.58849	0	0	0	0	0	0	0	0	0	0	0	0	0	0	0	0	0	0	0	0	0	0	0
FBtr0070751	1.28064	1.02312	1.03026	0.684834	0.835406	0.705986	0.629778	0.613788	0.813593	1.21111	0.740027	1.3709	0.450913	1.00025	0.654888	0.983725	0.655564	0.539984	0.731752	0.444733	0.296238	0.355223	0.262222	0.335585	0.29413	0.240164	0	0	0	0	0	0	0	0	0	0	0	0	0	0	0	0	0	0	0	0	0	0	0
FBtr0070752	0.235736	0.355271	0.30962	0.825442	1.17334	0.892933	0.957959	0.708055	1.70466	1.01816	0.636997	0.680266	0.713847	0.665384	0.874757	1.314	0.620996	0.421517	0.602444	0.522732	0.546713	0.38843	0.667889	0.305628	0.698133	0.34409	1	0	0	1	1	0	0	1	1	0	0	1	1	0	0	1	1	0	0	1	1	0	0
FBtr0070755	2.3654	1.11704	1.69188	1.43096	0.799597	1.71833	0.707335	0.567631	0.305878	0.559171	0.102341	0.337478	0.483163	0.960142	0.271605	0.632678	1.51516	0.218832	0.173033	3.30709	0.907774	0.843249	0.870753	0.577951	0.56561	0.407763	0	0	0	0	0	0	0	0	0	0	0	0	0	0	0	0	0	0	0	0	0	0	0
FBtr0070756	0.949593	0.475288	1.28868	0.810187	1.0653	1.0862	0.738083	0.843462	0.624923	0.494768	0.643844	0.518948	0.432473	0.463074	0.591175	0.569013	0.857782	0.903865	0.818294	0.759373	0.314945	0.313864	0.297655	0.351645	0.227348	0.312505	0	0	0	0	0	0	0	0	0	0	0	0	0	0	0	0	0	0	0	0	0	0	0
FBtr0070757	0.0128102	0.0241309	0.0159435	0.0122661	0.0822104	0.0357696	0.0454728	0.0517596	0.00345722	0.0181733	0.0357167	0.00520962	0.260676	0.0551495	0.470232	0.635358	0.020972	0.107727	0.0340974	1.63134	1.53699	2.01255	0.884216	0.689305	0.825447	0.543898	0	0	0	0	0	0	0	0	0	0	0	0	0	0	0	0	0	0	0	0	0	0	0
FBtr0070758	0.100216	0.047068	0.0277146	0.0136452	0.0224594	0.0133543	0.101464	0.0312948	0.0185089	0.0707477	0.168709	0.0764333	0.410475	0.891601	0.551822	0.395443	1.18485	0.0986889	0.0937704	3.28701	1.37259	2.06989	0.826384	0.652977	0.695507	0.613718	0	0	0	0	0	0	0	0	0	0	0	0	0	0	0	0	0	0	0	0	0	0	0
FBtr0070759	0.222312	1	0.220364	1	0.195104	0.234278	0.680817	0.0311852	0.201731	0.267225	0.676817	0.420509	3.57722	6.64979	1.99361	1.85465	4.04163	8.20396	0.249877	9.29601	1.22756	1.26008	0.66192	0.837953	0.711179	0.896128	0	0	0	0	0	0	0	0	0	0	0	0	0	0	0	0	0	0	0	0	0	0	0
FBtr0070762	0.211967	0.268539	0.41937	0.716847	1.61775	0.831082	1.42313	0.495545	0.655623	0.901425	1.03474	0.897009	0.638458	1.53098	0.442101	1.08991	0.74561	0.756733	1.06953	0.926595	0.548519	0.40043	0.627136	0.371277	0.768146	0.430668	0	0	0	0	0	0	0	0	0	0	0	0	0	0	0	0	0	0	0	0	0	0	0
FBtr0070763	2.14452	0.34585	1.16074	0.932429	0.468892	0.367661	0.149368	0.187843	0.74343	0.452291	0.332891	0.429048	0.389276	0.283282	0.293054	0.34554	0.509781	0.47117	0.359523	0.324663	0.908208	0.484072	0.879484	0.558612	0.900384	0.711073	2	1	1	2	3	1	1	3	2	1	1	2	2	1	1	2	2	1	1	2	2	1	1
FBtr0070764	1.09923	0.726937	1.53599	0.715378	0.792648	1.85376	1.29355	1.79119	0.561398	0.771301	0.684513	0.706072	0.871737	1.08835	0.944527	0.512568	1.35626	1.62654	1.15038	0.991326	0.303675	0.461176	0.381026	0.516387	0.266201	0.500369	1	0	0	1	1	1	1	1	1	1	1	1	1	1	1	1	1	1	1	1	1	1	1
FBtr0070772	1.59846	0.779902	0.879993	0.866438	0.642031	0.366405	0.825531	0.522593	0.84019	0.61872	0.619749	0.721476	0.612394	1.09997	0.452909	0.721645	0.728544	0.517604	0.688156	0.467595	0.395447	0.323872	0.397847	0.282402	0.426234	0.363594	2	2	2	2	2	2	2	2	2	2	2	2	2	2	2	2	1	2	1	2	2	2	2
FBtr0070776	0.101305	0.0714349	0.265835	0.0295705	0.0456123	0.330749	0.505851	0.899004	0.083567	0.758216	0.327361	0.485306	1.07494	0.389948	0.944245	0.552706	1.05591	0.870816	0.722867	0.818017	0.798448	0.610489	0.803333	0.82701	0.899234	1.20339	0	0	0	0	0	0	0	0	0	0	0	0	0	0	0	0	0	0	0	0	0	0	0
FBtr0070777	3.98723	1.3535	0.775697	0.986037	1.30434	1.98282	0.879999	2.00822	3.51068	4.33462	0.91348	1.70904	3.73398	3.342	3.10299	1.97174	1.66414	1.23116	1.18935	1.83888	0.623677	0.490834	0.767643	0.572	0.873779	0.315864	0	0	0	0	0	0	0	0	0	0	0	0	0	0	0	0	0	0	0	0	0	0	0
FBtr0070778	0.179936	4.85878	0.929792	6.19473	0.866053	0.672665	1.40906	0.564507	0.557763	0.394732	0.510129	0.541417	0.922315	0.963583	0.760483	0.555614	0.924443	0.829298	1.25961	0.685165	0.430107	1.28277	0.571452	1.18368	0.597958	0.939274	0	0	0	0	3	1	1	3	3	3	3	4	5	4	4	5	1	1	1	1	0	1	0
FBtr0070779	0.00686673	1	0.00880916	0.253043	0.0624941	0.201679	0.0313897	6.80824	120.163	0.457938	1.08393	8.22835	7.07855	16.8588	0.608076	0.0818505	1.64822	8.51025	85.6722	46.8233	2.01767	1.61484	2.42067	1.3006	0.946148	1.54068	0	0	0	0	0	0	0	0	0	0	0	0	0	0	0	0	0	0	0	0	0	0	0
FBtr0070780	0.193591	0.633362	0.420511	0.29176	0.577978	0.544227	0.604632	0.511877	0.245854	0.380101	0.289952	0.360438	0.905688	0.611149	0.34171	0.534493	0.560627	0.585998	0.803776	0.371755	0.482036	0.250445	0.448041	0.286064	0.420256	0.292941	0	0	0	0	1	1	1	1	0	1	0	1	1	1	1	1	0	0	0	0	1	0	0
FBtr0070781	0.398514	1.56123	0.17578	0.42844	0.824565	0.545719	0.989283	0.499048	0.446888	0.45046	1.13618	0.510703	0.371084	0.64067	0.171181	0.22649	0.290197	0.381348	0.342655	0.251722	0.666569	0.686661	0.569539	0.661677	0.628565	0.708201	0	0	0	0	1	0	0	1	0	1	0	1	1	1	1	1	0	1	0	1	0	0	0
FBtr0070782	0.0581751	0.11079	0.294982	0.308768	0.765077	0.584075	0.513294	0.694181	0.340638	0.313964	0.352996	0.39358	0.209226	0.445583	0.170819	0.287046	0.362969	0.240869	0.48497	0.346952	0.560739	0.452039	0.609328	0.523035	0.740585	0.623332	0	1	0	1	1	1	1	1	1	0	0	1	1	0	0	1	1	1	1	1	1	0	0
FBtr0070785	1.13199	0.582361	0.871961	0.420361	0.176426	0.180319	0.139926	0.132285	0.252679	0.271535	0.36926	0.27091	0.309709	0.413907	0.240761	0.281834	0.173549	0.306636	0.153458	0.225337	0.89044	0.4274	0.840722	0.536101	0.859926	0.641134	0	0	0	0	0	0	0	0	0	0	0	0	0	0	0	0	0	0	0	0	0	0	0
FBtr0070791	0.0898548	1	0.867931	0.0402591	0.0772477	0.0502476	0.0338864	1	451.156	0.320607	1.75873	11.2464	1	1	0.324716	10.8001	0.642001	1	15.683	7.05214	3.01142	1.35179	2.4312	1.93998	1.50127	1.05475	0	0	0	0	0	0	0	0	0	0	0	0	0	0	0	0	0	0	0	0	0	0	0
FBtr0070795	2.81597	2.61676	2.10434	2.83993	2.29342	2.20875	2.33383	4.02397	2.86407	4.80583	2.93036	2.75318	1.16957	2.50886	2.17288	2.28514	2.07416	2.31534	3.21975	2.05212	0.24541	0.311216	0.138262	0.308873	0.126959	0.266744	0	1	0	1	0	0	0	0	0	0	0	0	0	0	0	0	0	0	0	0	0	0	0
FBtr0070797	0.326037	0.856251	0.503512	0.47117	1.38692	2.10578	1.34901	1.27393	1.99103	2.26612	1.27505	7.75775	1.51804	1.11388	1.26415	1.03075	1.35217	0.891721	1.09791	1.04222	0.398099	1.13659	0.543509	1.09539	0.622963	0.59547	0	0	0	0	0	0	0	0	0	0	0	0	1	0	0	1	2	1	1	2	0	0	0
FBtr0070798	0.71507	0.356369	0.835454	0.663356	0.559961	0.544612	0.417153	0.450498	0.626611	0.78726	0.710162	0.69772	0.391799	0.767485	0.559832	0.540933	0.690713	0.631734	0.789901	0.597378	0.234971	0.224827	0.224899	0.278269	0.288409	0.26062	1	1	1	1	1	1	1	1	1	1	1	1	0	1	0	1	1	1	1	1	1	1	1
FBtr0070799	1.36085	0.96971	0.860656	1.28159	0.864527	0.665831	0.541968	0.540752	1.08852	1.1219	1.04647	1.0314	1.07068	1.11751	1.43004	1.41959	0.88179	0.693585	0.964024	0.821236	0.253645	0.293311	0.286418	0.29995	0.372902	0.38326	0	0	0	0	0	0	0	0	0	0	0	0	0	0	0	0	0	0	0	0	0	0	0
FBtr0070800	0.143385	0.307118	0.437201	0.343726	0.656426	0.685891	0.471502	0.309688	0.209443	0.158955	0.316453	0.238631	0.445681	0.196746	0.291387	0.231447	0.390953	0.203201	0.316341	0.22777	0.397073	0.518127	0.50498	0.532766	0.496937	0.446097	0	0	0	0	0	0	0	0	0	0	0	0	0	0	0	0	0	0	0	0	0	0	0
FBtr0070802	0.176262	1	0.229071	0.0427133	0.368578	0.358252	0.179138	3.5242	0.0712756	0.0208083	0.80557	0.3206	3.49972	1	0.616821	0.0640004	0.387862	0.381702	0.0673878	0.337043	1.61255	1.49138	0.864305	1.53107	0.378561	1.28292	0	0	0	0	0	0	0	0	0	0	0	0	0	0	0	0	0	0	0	0	0	0	0
FBtr0070804	0.189027	0.361457	0.6154	0.856916	1.35484	1.37631	1.12576	0.996262	0.481448	0.732523	0.647088	0.433844	1.11198	0.806498	0.887909	0.558423	1.18609	1.46408	1.01628	1.10257	0.425427	0.428627	0.58355	0.473428	0.636417	0.467313	1	1	1	1	1	1	1	1	1	1	1	1	1	1	1	1	1	2	1	2	1	1	1
FBtr0070806	0.260851	1	2.41021	1	0.166318	3.16733	0.543184	0.138999	0.324256	0.828508	0.379667	0.216031	0.536441	0.217546	0.396949	0.214539	0.534021	0.0509518	0.0850097	1.61466	1.18407	1.14007	1.25829	1.04027	1.24901	0.974342	0	0	0	0	0	0	0	0	0	0	0	0	0	0	0	0	0	0	0	0	0	0	0
FBtr0070807	0.370935	0.0780958	0.685921	0.698677	1.03309	0.85775	0.795174	1.42292	0.570723	0.602386	0.533872	0.508126	0.586737	0.866187	0.656225	0.608515	0.77167	0.747665	0.769696	0.838584	0.2661	0.468622	0.346498	0.637462	0.381102	0.723588	1	1	1	1	1	1	1	1	1	1	1	1	1	1	1	1	1	1	1	1	1	1	1
FBtr0070808	0.115426	0.0425672	0.0501705	1	0.28941	0.988632	0.132602	0.702291	0.933303	21.4015	0.267605	1.45016	0.51514	0.380917	0.765859	0.34035	0.546543	0.618211	0.635207	0.588142	0.704202	2.38617	1.08883	1.97184	0.69042	0.656831	0	0	0	0	0	0	0	0	0	0	0	0	0	0	0	0	0	0	0	0	0	0	0
FBtr0070809	0.0265449	0.0288592	0.391991	0.406824	1.1441	1.03416	1.15463	1.06783	0.89571	0.463918	0.421121	0.800533	0.705643	0.807509	1.44072	0.949015	0.83663	0.910622	0.870429	0.955114	0.532226	0.452144	0.686045	0.640158	0.828646	0.796559	0	0	0	0	0	0	0	0	0	0	0	0	0	0	0	0	0	0	0	0	0	0	0
FBtr0070813	0.154137	0.169308	0.15267	1	0.133838	0.169185	0.29363	1	0.00822593	0.0729076	0.0617879	0.0111457	0.363615	1	0.109259	0.292043	1	0.142261	0.125813	0.932889	1.19138	0.919151	0.725346	1.15353	0.402869	0.820418	0	0	0	0	0	0	0	0	0	0	0	0	0	0	0	0	0	0	0	0	0	0	0
FBtr0070814	0.635965	3.41643	0.668122	0.512026	0.603824	1.30914	1.18848	1.75048	1.52348	1.42181	0.460113	1.0281	1.19907	0.597864	1.21237	0.409501	1.12578	0.986586	1.01617	1.06204	0.360927	0.696085	0.489719	0.632211	0.358478	0.701352	0	0	0	0	0	0	0	0	0	0	0	0	0	0	0	0	0	0	0	0	0	0	0
FBtr0070815	0.241864	1	0.863148	1	0.358182	6.936	2.45746	2.70762	2.00175	35.6955	0.613328	2.9395	1	1	1	0.150049	7.06243	0.059993	52.2275	0.063846	2.37273	2.12049	0.844868	1.61779	1.04178	0.962428	0	0	0	0	0	0	0	0	0	0	0	0	0	0	0	0	0	0	0	0	0	0	0
FBtr0070816	0.184952	1	4.78208	1	1	0.135488	0.176946	0.103476	0.0506575	0.056867	0.169746	0.0518185	1.47	20.7982	0.320681	0.402551	0.490577	0.113195	5.85663	2.67269	1.44893	2.44321	1.74926	1.20766	1.43115	0.90852	0	0	0	0	0	0	0	0	0	0	0	0	0	0	0	0	0	0	0	0	0	0	0
FBtr0070817	1.10224	5.57968	3.0763	2.07679	1.51506	3.33526	2.80436	2.63346	2.00263	1.6551	2.04851	0.942528	2.56422	3.02004	2.86714	0.436741	1.97884	2.09071	2.32887	2.34484	0.279962	0.589032	0.357708	0.602511	0.453485	0.451427	0	0	0	0	0	0	0	0	0	0	0	0	0	0	0	0	0	0	0	0	0	0	0
FBtr0070819	0.14705	1	0.254248	1	0.127543	1	0.0755011	1	0.00365533	0.00463529	0.0183455	0.0128459	0.500375	1	0.227694	0.199111	0.099234	1	1	1	1.22915	0.625171	0.890413	0.764495	0.497158	0	0	0	0	0	0	0	0	0	0	0	0	0	0	0	0	0	0	0	0	0	0	0	0
FBtr0070820	0.178042	1	0.299889	1	0.268655	1	1.07253	0.100809	0.00144072	0.0354104	0.0291973	0.0138879	0.0259047	11.1912	0.1151	0.148077	0.0647274	1	0.0539484	0.93193	1.51653	2.0619	1.27681	0.992545	0.912672	0.579972	0	0	0	0	0	0	0	0	0	0	0	0	0	0	0	0	0	0	0	0	0	0	0
FBtr0070821	1.98687	1.81203	1.31166	1.14331	1.14601	0.874728	1.2138	1.16732	0.672432	0.813287	0.685038	1.54422	1.93267	2.09306	0.715548	0.902444	1.30285	1.83388	1.30273	1.35517	0.380694	0.332835	0.414154	0.315678	0.273955	0.31847	0	0	0	0	0	0	0	0	0	0	0	0	0	0	0	0	0	0	0	0	0	0	0
FBtr0070822	1.94461	1.61768	0.809184	1.07632	1.03474	1.25238	1.42496	1.64058	0.915542	1.06004	1.10199	1.7462	1.48098	1.70763	1.17444	1.2409	1.18931	1.22272	1.17659	1.25489	0.265099	0.192426	0.347202	0.218529	0.381658	0.199004	0	0	0	0	0	0	0	0	0	0	0	0	0	0	0	0	0	0	0	0	0	0	0
FBtr0070824	0.801845	0.310735	0.727187	0.434497	0.316088	0.235105	0.541105	1.02171	1.24563	0.76463	1.06226	1.05689	2.0214	1.41579	1.42881	0.886343	1.9281	0.352672	0.660945	6.55042	0.538432	1.44577	0.432325	0.565602	0.36334	0.713374	0	0	0	0	0	0	0	0	0	0	0	0	0	0	0	0	0	0	0	0	0	0	0
FBtr0070825	0.0515433	0.0708256	0.471618	0.599478	0.997335	0.846867	0.876476	0.471023	0.448722	0.420557	0.489897	0.443267	0.257191	0.446517	0.456568	0.568088	0.463303	0.442019	0.508355	0.430782	0.537676	0.406244	0.609974	0.53315	0.715563	0.652138	0	1	0	1	0	1	0	1	0	1	0	1	0	1	0	1	0	1	0	1	0	1	0
FBtr0070827	0.962182	0.847371	0.445518	0.688754	1.1624	1.09945	1.12553	1.44096	1.0672	0.789375	0.767551	1.30126	0.897112	1.10506	1.26878	1.41956	1.34265	1.319	1.35463	1.92972	0.272147	0.310395	0.296246	0.293476	0.357808	0.321987	2	2	2	2	2	0	0	2	2	2	2	2	2	2	2	2	2	2	2	2	2	1	1
FBtr0070828	0.0608164	0.0309478	0.271848	0.215704	0.442666	0.590182	0.692612	0.644415	0.170615	0.281532	0.173551	0.188654	0.309266	0.449946	0.149021	0.202776	0.461241	0.592728	0.475897	0.48058	0.606624	0.572842	0.762557	0.742057	0.728711	0.798868	0	1	0	1	1	1	0	2	1	0	0	1	1	2	0	3	2	1	0	3	0	0	0
FBtr0070829	2.14971	1.71734	1.48624	1.11957	1.15531	0.595795	0.796399	0.545048	1.82117	1.79915	2.23463	1.45524	0.826299	1.39125	1.39614	1.1522	1.23995	1.27347	1.6364	1.22728	0.33714	0.335817	0.35306	0.453207	0.411996	0.550514	0	0	0	1	0	0	0	1	0	0	0	1	0	0	0	1	0	0	0	1	0	0	0
FBtr0070830	0.133706	0.183878	0.347214	0.492807	0.837277	0.84258	1.30674	0.869888	0.513911	0.734036	0.5624	0.434601	0.357229	0.541747	0.366752	0.37894	0.732933	0.799925	0.817973	0.810222	0.564541	0.38607	0.666115	0.453372	0.798853	0.543634	0	0	0	0	0	0	0	0	0	0	0	0	0	0	0	0	0	0	0	0	0	0	0
FBtr0070832	1.4164	0.733896	2.11348	0.753908	0.310284	0.266011	0.970461	1.49349	0.680837	2.32634	1.26543	1.16477	1.34336	1.25318	1.21983	1.76326	1.41778	1.16608	1.53982	1.41975	0.400445	0.46804	0.556907	0.643211	0.630608	0.624867	0	0	0	0	0	0	0	0	0	0	0	0	0	0	0	0	0	0	0	0	0	0	0
FBtr0070833	2.94636	7.64279	1.74433	1.65211	0.948439	1.12349	1.67134	2.83955	3.3437	4.59221	2.51023	5.34004	1.30916	2.8907	0.273404	1	0.0816437	6.27602	7.56116	0.195102	0.961782	0.745312	0.408404	0.638393	0.452956	0.897099	0	0	0	0	0	0	0	0	0	0	0	0	0	0	0	0	0	0	0	0	0	0	0
FBtr0070836	0.369067	6.48585	0.503543	0.647412	1.3747	1.43717	1.15391	0.752572	1.87979	0.489248	1.51872	3.26744	1.86501	1.43844	1.44019	1.20618	1.07345	1.27239	1.05063	1.60887	0.413818	0.967244	0.521303	1.07619	0.575743	1.19794	0	0	0	0	0	0	0	0	0	0	0	0	0	0	0	0	0	0	0	0	0	0	0
FBtr0070837	2.8602	2.88564	1.16837	1.24805	1.84689	1.45715	1.85402	1.5126	1.40903	1.77627	1.33271	1.70514	1.27777	1.50292	1.40755	1.57567	1.601	1.89765	1.74647	1.62005	0.295784	0.260757	0.351478	0.32909	0.360768	0.421527	0	0	0	0	0	0	0	0	0	0	0	0	0	0	0	0	0	0	0	0	0	0	0
FBtr0070840	0.587509	1.22755	1.44332	1.84435	1.89511	2.70054	1.406	1.17556	0.788342	0.876955	0.862634	1.14613	0.667439	0.744095	1.14515	1.37222	1.73912	2.41763	1.17838	1.52261	0.38316	0.425683	0.427101	0.448917	0.408431	0.409073	0	0	0	0	0	0	0	0	0	0	0	0	0	0	0	0	0	0	0	0	0	0	0
FBtr0070841	1.07654	0.6365	0.688022	0.874707	0.536681	0.391828	0.635132	0.382702	0.789561	0.882155	0.665272	0.649894	0.47282	1.00084	0.874001	0.899521	0.473083	0.447202	0.46612	0.451942	0.299398	0.358677	0.256309	0.345426	0.322511	0.409269	3	3	3	3	3	4	3	4	1	2	0	3	3	3	3	3	2	1	1	2	1	1	0
FBtr0070843	0.466402	0.118177	0.954694	0.929948	1.3709	1.31392	1.41238	0.722948	0.545815	0.461941	0.55832	0.466747	0.414971	0.718183	0.598738	0.61073	0.781589	0.796114	0.897216	0.7287	0.448263	0.459581	0.483792	0.62504	0.419748	0.647658	2	1	1	2	2	1	1	2	2	1	1	2	2	1	1	3	3	1	1	3	3	1	1
FBtr0070844	0.556713	0.870528	0.402035	0.217403	0.995357	0.904375	0.7731	0.947426	0.879457	0.803887	0.63828	1.77088	0.951701	0.713219	0.637598	0.617661	0.591706	0.459727	0.886762	0.720865	0.266565	0.505667	0.3081	0.540651	0.379239	0.471406	0	0	0	0	0	0	0	0	0	0	0	0	0	0	0	0	0	0	0	0	0	0	0
FBtr0070846	0.335972	0.107206	0.37926	0.167446	0.468279	0.407586	0.424598	0.190571	0.288777	0.157904	0.218674	0.126449	0.286217	0.187593	0.239774	0.10815	0.359078	0.189392	0.357524	0.194565	0.234784	0.46657	0.258577	0.566707	0.142024	0.600612	0	1	0	1	0	1	0	1	0	1	0	1	0	1	0	1	0	1	0	1	0	1	0
FBtr0070847	0.0562101	0.0850275	0.408602	0.496734	0.912446	0.752921	1.10687	0.860188	0.656607	0.618145	0.63442	0.391743	0.460807	0.353172	0.570515	0.376813	0.800361	0.581048	0.746104	0.59301	0.45758	0.43396	0.588767	0.519254	0.769496	0.628165	1	3	1	3	1	3	1	3	1	3	1	3	1	3	1	3	1	1	0	2	1	3	1
FBtr0070849	1.14645	0.5588	0.661418	0.816198	1.55058	1.39538	1.34541	1.3621	0.805638	0.729238	0.574813	1.06636	1.61434	0.850844	1.36707	0.994641	1.56724	1.60752	1.34176	1.16257	0.321972	0.313261	0.388472	0.348484	0.323689	0.399677	0	0	0	0	0	0	0	0	0	0	0	0	0	1	0	1	0	0	0	0	0	0	0
FBtr0070852	0.0558043	0.0675839	0.33375	0.235381	0.365096	0.611075	0.561373	0.922429	0.351568	0.427619	0.282233	0.252708	1.06448	0.644066	0.740796	0.671296	0.582227	0.855247	0.52361	0.591747	0.573064	0.524913	0.501041	0.735001	0.632613	0.835193	0	0	0	0	0	0	0	0	0	0	0	0	0	0	0	0	0	0	0	0	0	0	0
FBtr0070859	0.196791	0.416782	0.780404	1.10074	0.760281	0.597952	0.47032	0.520211	1.25807	0.482228	0.827464	0.43268	0.358789	0.743279	1.37775	0.769628	0.796368	0.569279	0.602713	0.560686	0.495575	0.332028	0.500891	0.435536	0.4999	0.46098	0	0	0	1	0	0	0	1	0	0	0	0	0	0	0	0	0	0	0	0	0	0	0
FBtr0070860	0.157278	0.196976	0.538031	1.13157	0.624954	0.801504	0.367623	0.374979	0.683962	0.556959	0.51044	0.564645	0.472276	0.294216	0.783401	0.7122	0.404768	0.538961	0.329281	0.41066	0.377016	0.487854	0.398992	0.543304	0.488913	0.673353	0	0	0	0	0	0	0	0	0	0	0	0	0	0	0	0	0	0	0	0	0	0	0
FBtr0070861	0.0594485	1.59037	0.0387441	0.115874	0.0414121	0.479875	0.94512	1.28042	0.485142	0.421789	0.119305	0.116207	0.808023	0.53074	0.488911	0.547776	0.0853271	0.0512641	0.0225264	0.138677	1.12587	0.984824	1.30418	0.931155	1.65715	0.790571	0	0	0	0	0	0	0	0	0	0	0	0	0	0	0	0	0	0	0	0	0	0	0
FBtr0070862	0.10427	1	0.0520396	1	0.0379835	1	0.0285692	1	0.0515334	1	0.136716	1	0.0411126	1	0.0614279	1	0.0244281	1	0.00530148	1	0.719281	0	0.619795	0	0.606217	0	0	0	0	0	0	0	0	0	0	0	0	0	0	0	0	0	0	0	0	0	0	0	0
FBtr0070863	1.04175	14.6413	0.340956	0.230336	0.449158	1.46278	1.17672	1.4257	0.869789	1.22907	2.2527	0.566264	1.38537	0.453879	0.623991	0.593467	2.17104	0.0360564	5.12078	87.6928	0.917623	2.52564	0.671492	1.71758	0.556189	1.53713	0	0	0	0	0	0	0	0	0	0	0	0	0	0	0	0	0	0	0	0	0	0	0
FBtr0070864	1.46403	2.67833	0.393839	1.3243	0.332556	3.7287	2.20874	2.78008	1.46646	0.989421	0.865001	1.2379	2.50828	1.3087	2.22034	1.23881	2.76583	2.49568	3.09941	2.52881	0.565886	0.455071	0.647283	0.517022	0.821606	0.376511	0	0	0	0	0	0	0	0	0	0	0	0	0	0	0	0	0	0	0	0	0	0	0
FBtr0070865	0.613639	0.589678	0.685396	0.528407	0.772143	0.914271	0.839143	0.503271	0.460387	0.23914	0.412879	0.59059	0.736665	0.525159	0.560798	0.390941	0.379254	0.291456	0.388138	0.294717	0.290809	0.406945	0.268361	0.386095	0.135584	0.300359	0	2	0	2	2	2	2	2	2	2	2	2	2	2	2	2	1	2	1	2	2	2	2
FBtr0070866	0.351102	0.340981	1.85065	1.31152	0.617539	0.4875	1.49085	1.07776	2.14856	0.857383	1.68259	2.57867	1.6276	1.51263	1.75474	1.20729	1.77327	2.21844	1.28504	2.21345	0.386606	0.546713	0.526602	0.726035	0.657938	0.577331	0	0	0	0	0	0	0	0	0	0	0	0	0	0	0	0	0	0	0	0	0	0	0
FBtr0070867	1.50387	1.28503	1.63363	0.929042	1.44933	0.539565	1.20295	0.524818	0.936707	0.877775	0.857983	0.873216	1.18628	0.788549	1.0398	1.26712	1.38175	1.34626	1.36523	1.10844	0.202844	0.308915	0.251216	0.336618	0.124632	0.442112	0	0	0	0	0	0	0	0	0	0	0	0	0	0	0	0	0	0	0	0	0	0	0
FBtr0070872	0.167329	1	0.347127	0.289451	0.427714	0.0393206	0.628671	0.0684599	0.390341	0.0324116	0.445726	0.0540665	0.581249	0.13386	0.432291	0.005132	0.416505	0.0720086	0.364153	0.064726	0.300651	1.70693	0.373368	1.54209	0.487105	1.28236	0	0	0	0	1	0	0	1	0	1	0	1	4	4	3	5	3	4	2	5	3	1	1
FBtr0070874	0.241698	0.302575	1.40612	0.610184	1.3795	1.85493	1.70871	1.74451	1.28065	1.92775	0.714677	0.883564	0.977412	1.02459	1.01386	1.07211	1.50331	1.87491	1.3563	1.3925	0.3727	0.455114	0.48121	0.58	0.545358	0.69764	0	1	0	1	3	1	1	3	3	2	2	3	3	3	2	4	4	3	3	4	1	1	1
FBtr0070877	2.27061	2.84427	2.1512	1.86411	2.20509	2.20964	1.86297	1.91211	1.30728	1.05655	1.3447	2.07887	2.71614	1.79454	1.69374	1.60641	1.75579	1.48162	1.48968	1.34771	0.241083	0.274487	0.233923	0.29058	0.0846923	0.204377	0	1	0	1	1	0	0	1	0	0	0	0	0	0	0	0	0	0	0	0	1	0	0
FBtr0070878	0.320228	1	0.428414	1.11407	0.412905	2.96855	1.69291	2.51692	3.2744	1.43194	1.4923	7.16856	2.1085	1.468	1.33614	1.00222	1.99687	0.116462	0.359014	5.59053	0.728506	0.925688	0.903889	0.862044	0.917314	0.52195	0	0	0	0	0	0	0	0	0	0	0	0	0	0	0	0	0	0	0	0	0	0	0
FBtr0070879	0.662223	9.76264	7.93188	1.51036	0.304288	33.3595	1.48689	2.25047	3.29051	0.896756	2.20638	0.368082	0.864345	1.00182	0.746354	0.829563	1.18154	0.0323672	0.883086	3.22752	1.16326	1.92483	1.0593	1.60565	1.38324	1.27123	0	0	0	0	0	0	0	0	0	0	0	0	0	0	0	0	0	0	0	0	0	0	0
FBtr0070881	0.0790129	0.211827	2.90865	5.20985	2.17721	0.841525	1.96333	1.38141	1.71894	9.91407	2.89919	2.75135	1.24155	1.38464	1.78772	0.812103	1.48641	1.05374	1.48741	1.53342	0.462934	1.17864	0.532083	1.08071	0.676381	1.17755	0	0	0	0	0	0	0	0	0	0	0	0	0	0	0	0	0	0	0	0	0	0	0
FBtr0070884	0.715955	0.352403	0.755903	0.61867	0.620844	0.364292	0.563991	0.305305	0.725988	0.73706	0.662887	0.448953	0.424004	0.731199	1.00403	0.612975	0.740641	0.527032	0.60154	0.435401	0.222379	0.304808	0.107403	0.362699	0.13186	0.344532	0	0	0	0	0	0	0	0	0	0	0	0	0	0	0	0	0	0	0	0	0	0	0
FBtr0070886	0.071678	1	0.281629	0.0116554	0.278561	0.524037	0.578447	0.307165	0.00697974	0.086525	0.213763	0.198448	0.928593	0.394459	0.452089	0.419774	0.42743	0.277145	0.415529	0.202225	0.723208	0.812119	0.840785	1.02553	0.689123	0.903729	0	0	0	0	0	0	0	0	0	0	0	0	0	0	0	0	0	0	0	0	0	0	0
FBtr0070887	0.814902	3.91669	1.32386	1.34005	1.68036	1.0321	1.78505	1.73504	0.864545	1.26916	1.34684	1.77869	1.87039	2.33568	1.46547	1.60545	1.2551	1.02935	0.87696	2.74082	0.289757	0.479832	0.308537	0.571244	0.312478	0.651006	0	0	0	0	0	0	0	0	0	0	0	0	0	0	0	0	0	0	0	0	0	0	0
FBtr0070889	0.105095	0.26105	0.526122	1.04839	0.993276	1.18879	0.685212	0.747694	0.331447	0.254162	0.280055	0.270042	0.253007	0.396116	0.246076	0.357454	0.75333	0.900504	0.49351	0.695892	0.593127	0.574178	0.655983	0.678221	0.640445	0.505865	1	2	1	2	2	2	2	2	2	2	2	2	2	2	2	2	1	1	1	1	2	2	2
FBtr0070890	0.329201	1.78321	0.359599	0.680502	0.591462	0.778877	0.718966	0.397596	0.130252	0.290714	0.419967	0.317363	1.35505	0.772504	0.452571	0.368309	0.290313	0.368023	0.363506	0.342083	0.679782	0.744908	0.487434	0.795171	0.37466	0.663845	3	2	2	3	2	2	2	2	2	2	2	2	2	2	2	2	2	2	2	2	3	2	2
FBtr0070891	0.735374	7.76579	0.0290015	0.79194	0.296102	0.719153	0.487997	0.403813	0.28214	0.368917	0.438634	0.314123	1.55041	0.553059	0.808449	0.519425	0.65955	0.809318	0.632745	0.599329	0.695753	1.77796	0.627022	1.71641	0.772067	1.47416	1	2	0	3	3	0	0	3	2	2	1	3	2	2	2	2	3	1	1	3	3	2	2
FBtr0070892	0.0231587	0.0480865	0.138124	0.0962328	0.50122	0.15522	0.429817	0.150196	0.308323	0.0830884	0.450451	0.106352	0.229157	0.589227	0.0810512	0.457483	0.320589	0.124143	0.302316	0.138978	0.576192	0.917482	0.619181	0.383579	0.83849	0.449416	0	0	0	0	0	0	0	0	0	0	0	0	0	1	0	2	0	0	0	0	0	0	0
FBtr0070894	1.54139	0.847284	1.20961	0.686883	0.971339	0.616493	0.709048	0.430632	0.448448	0.613432	0.828372	0.710002	0.483294	1.30299	0.637054	0.744635	0.605892	0.749044	0.80306	0.728657	0.412341	0.304046	0.404915	0.211203	0.319556	0.267563	1	1	1	1	1	1	1	1	1	1	1	1	1	1	1	1	1	1	1	1	1	1	1
FBtr0070895	0.436672	0.193163	0.73204	0.851679	0.823457	1.67826	0.618229	0.993834	0.26753	0.689302	0.214456	0.863329	0.519093	0.818912	0.298649	0.695429	0.671115	1.44693	0.97319	1.30285	0.455219	0.448238	0.483594	0.548275	0.255352	0.655492	0	0	0	0	0	0	0	0	0	0	0	0	0	0	0	0	0	0	0	0	0	0	0
FBtr0070896	1.65561	1.16366	0.502835	0.769302	0.650647	0.387972	0.423276	0.258298	0.806507	0.608063	0.638488	0.521578	0.746577	1.10608	1.03956	0.857254	0.553929	0.493219	0.552234	0.563562	0.477209	0.442016	0.576028	0.517847	0.708845	0.633172	0	1	0	2	0	1	0	2	0	1	0	2	0	1	0	2	0	1	0	2	0	1	0
FBtr0070897	0.672751	0.844472	0.790756	0.73893	1.18211	0.72778	0.919313	0.904586	0.821018	0.709746	0.752206	0.771826	0.614263	0.85497	0.591089	0.794069	0.946658	0.937901	0.945338	0.90606	0.219641	0.100105	0.209015	0.0973522	0.245168	0.106031	0	0	0	0	0	0	0	0	0	0	0	0	0	0	0	0	0	0	0	0	0	0	0
FBtr0070898	0.182954	0.082817	0.655654	0.32117	1.08957	0.777365	0.876001	0.660427	0.480194	0.864658	0.639301	0.485221	0.621539	0.663752	0.485572	0.473926	0.401145	0.438568	0.70621	0.312031	0.410445	0.467613	0.479351	0.554976	0.553709	0.689565	0	0	0	0	0	0	0	0	0	0	0	0	0	0	0	0	0	0	0	0	0	0	0
FBtr0070899	0.0855339	0.0864758	0.366234	0.461501	0.8388	0.748051	0.722066	0.576597	0.439754	0.50521	0.49383	0.403261	0.241539	0.54067	0.327296	0.295896	0.308578	0.273612	0.304278	0.325453	0.543477	0.442219	0.54414	0.473927	0.682454	0.598885	0	0	0	0	0	1	0	1	0	1	0	1	0	1	0	1	1	1	1	1	0	1	0
FBtr0070900	0.678523	0.0716502	0.505445	0.125406	1.22421	0.801283	1.10796	1.13263	0.231154	0.906511	0.614976	1.27718	1.37221	1.01017	0.951604	1.16333	1.37034	1.22851	1.22566	0.939802	0.428935	0.497843	0.515447	0.707982	0.389305	0.975665	0	0	0	0	0	0	0	0	0	0	0	0	0	0	0	0	0	0	0	0	0	0	0
FBtr0070903	0.219198	0.306133	1.04855	0.495805	0.76065	1.26832	0.999653	0.51803	0.480753	0.825836	1.06905	1.46622	0.653496	1.34667	0.621977	0.54031	1.22426	1.30186	1.0866	1.42917	0.393191	0.479809	0.456515	0.571043	0.50193	0.656713	0	0	0	0	0	0	0	0	0	0	0	0	0	0	0	0	0	0	0	0	0	0	0
FBtr0070905	3.15968	1.80855	1.41365	0.985957	0.997991	0.561807	0.779539	0.606259	1.39758	0.937469	0.831828	1.13924	1.02297	0.922311	1.04278	1.34761	1.13575	1.16962	1.25548	1.05963	0.526091	0.339858	0.622371	0.449613	0.680525	0.582992	0	0	0	0	0	0	0	0	0	0	0	0	0	0	0	0	0	0	0	0	0	0	0
FBtr0070906	1.85788	0.622248	0.687553	0.754454	1.22366	1.41998	1.60632	1.22091	1.59389	0.860886	1.39188	1.16193	4.72578	2.514	2.26213	1.56376	1.02746	0.753918	1.18083	0.780768	0.645334	0.48874	0.292075	0.305667	0.379016	0.3761	0	0	0	0	0	0	0	0	0	0	0	0	0	0	0	0	0	0	0	0	0	0	0
FBtr0070912	1.60628	1.28299	1.14349	0.613719	0.528394	0.473367	0.190786	0.262482	0.544654	0.434038	0.336355	0.565823	0.148314	0.297757	0.28312	0.546862	0.417225	0.644918	0.338085	0.709776	0.838139	0.488612	0.74519	0.58407	0.727724	0.669873	1	2	1	2	1	2	1	2	1	2	1	2	1	2	1	2	1	2	1	2	1	2	1
FBtr0070913	0.269827	1.75718	0.764468	0.626634	1.12519	1.33653	0.852517	1.06294	1.59061	2.7922	0.303548	1.94587	1.92446	1.24249	1.0603	0.739433	1.39712	1.2361	2.0572	1.28154	0.542759	0.449921	0.614041	0.477423	0.4739	0.397124	0	0	0	0	0	0	0	0	0	0	0	0	0	0	0	0	0	0	0	0	0	0	0
FBtr0070914	0.0782935	0.034507	0.372031	0.217204	0.602679	0.513569	0.476491	0.109697	0.218533	0.295862	0.492135	0.362888	0.20838	0.639307	0.23558	0.249629	0.30686	0.263319	0.282105	0.23101	0.484266	0.611358	0.519865	0.680568	0.584717	0.961688	6	3	3	6	7	6	6	7	6	6	6	6	7	6	6	7	7	7	7	7	7	7	7
FBtr0070915	0.0823911	0.161897	0.17029	0.202539	0.319978	0.620807	0.344736	0.252674	0.123611	0.132433	0.193153	0.207283	0.179533	0.131102	0.150693	0.155595	0.212104	0.104431	0.171671	0.131097	0.417258	0.719663	0.513335	0.684912	0.543493	0.681293	0	0	0	0	0	1	0	1	0	1	0	1	0	0	0	0	0	0	0	0	0	0	0
FBtr0070918	1.40054	0.869669	0.992701	0.658131	0.660661	0.374034	0.607319	0.384896	0.498476	0.333345	0.429931	0.384239	0.556437	0.398396	0.629473	0.352134	0.548072	0.826775	0.741291	0.475495	0.408623	0.401585	0.480265	0.430147	0.399505	0.416672	2	2	2	2	2	2	2	2	2	2	2	2	2	2	2	2	2	2	2	2	2	2	2
FBtr0070921	0.362496	0.133963	0.779407	0.510869	0.946742	1.10271	1.04121	0.901315	0.530798	1.03895	0.820878	0.970112	0.569309	1.05902	1.23792	0.881177	1.0511	1.15432	0.941747	0.999241	0.328144	0.360843	0.342673	0.48601	0.383631	0.648436	1	0	0	1	1	1	1	1	1	1	1	1	1	1	1	1	1	1	1	1	1	1	1
FBtr0070922	0.254383	0.100902	0.633553	0.238543	0.057336	0.157705	0.0177987	0.0686906	0.00887688	0.151393	0.0393291	0.122762	0.170083	0.209083	0.0577119	0.175037	0.0987101	0.0393292	0.225994	0.232391	1.20556	0.450211	1.45544	0.417292	1.16943	0.526312	0	0	0	0	0	0	0	0	0	0	0	0	0	0	0	0	0	0	0	0	0	0	0
FBtr0070924	0.95861	1.6093	0.878031	1.02686	0.903648	1.3624	1.06187	1.87951	0.509918	1.01361	0.468163	0.618002	1.61094	0.936435	1.01834	1.01249	1.14472	1.3855	1.11113	1.02675	0.33586	0.310974	0.309882	0.364928	0.0857164	0.246942	1	1	1	1	1	1	1	1	0	1	0	1	1	1	1	1	1	1	1	1	1	1	1
FBtr0070925	0.209193	0.125969	0.508559	0.387289	0.404943	0.329523	0.437302	0.27238	0.455268	0.289574	0.317449	0.209678	0.435571	0.520699	0.334705	0.426907	0.443692	0.368262	0.436396	0.305673	0.218568	0.344342	0.278745	0.340896	0.328393	0.402318	0	1	0	1	1	1	1	1	0	1	0	1	1	1	1	1	0	0	0	0	1	0	0
FBtr0070926	0.0465201	11.6821	0.0261728	0.527747	0.034029	0.188715	0.0141424	0.361041	0.0268786	0.00845731	0.0389739	0.00477137	0.658626	1.38939	0.180463	0.309329	0.0289723	0.285347	0.00120273	0.958132	1.89958	2.27706	0.362992	2.20055	0.450169	1.77534	0	0	0	0	0	0	0	0	0	0	0	0	0	0	0	0	0	0	0	0	0	0	0
FBtr0070930	0.268907	0.125154	0.294488	0.532389	0.678966	0.754376	0.613752	0.423919	0.426079	0.654285	0.414326	0.601489	0.265233	0.551225	0.314352	0.44826	0.319885	0.307467	0.300792	0.321041	0.376193	0.39494	0.369743	0.429388	0.457884	0.570003	3	1	1	3	4	1	1	4	2	3	1	4	3	1	1	3	4	2	2	4	2	2	1
FBtr0070933	3.41744	2.5116	1.16229	1.32767	2.00855	1.59913	1.3894	0.68992	0.972847	0.672615	0.829202	1.3429	0.984225	1.01355	1.65329	1.04024	1.74837	1.46743	1.75695	1.44278	0.473764	0.403902	0.594064	0.500359	0.508343	0.493498	0	0	0	0	0	0	0	0	0	0	0	0	0	0	0	0	0	0	0	0	0	0	0
FBtr0070937	0.46174	0.52951	0.735915	0.898786	2.11362	1.77963	1.91314	1.86992	2.26422	1.48583	1.37412	1.42532	0.795148	0.844199	1.32298	1.09461	1.63713	1.5212	2.18517	1.41333	0.440188	0.334856	0.507135	0.390793	0.634238	0.519697	1	1	1	1	1	1	1	1	1	1	1	1	1	1	1	1	1	1	1	1	1	1	1
FBtr0070944	0.282346	1	0.0886323	1	0.256698	1	0.0359343	1	0.105807	1	0.0934145	1	0.375797	1	0.391801	7.6302	0.105822	1	0.0127815	5.42432	0.796946	1.1341	0.699555	0	0.735481	0	0	0	0	0	0	0	0	0	0	0	0	0	0	0	0	0	0	0	0	0	0	0	0
FBtr0070945	1.00431	0.865682	0.591237	31.1184	2.47654	1.0217	1.90147	0.856709	1.33359	24.1795	1.32736	1.52211	0.943338	2.11416	2.16296	0.514039	1.32064	2.4683	1.08833	4.41238	0.416282	1.60855	0.463193	1.40052	0.571624	1.78393	0	0	0	0	0	0	0	0	0	0	0	0	0	0	0	0	0	0	0	0	0	0	0
FBtr0070946	0.143197	0.132591	0.356168	0.102482	0.27714	0.0505945	0.267036	0.145757	0.531446	0.756219	0.352822	0.294723	0.181325	0.408956	0.142594	0.412906	0.161175	0.187772	0.480412	0.888791	0.482297	0.842745	0.400964	1.06226	0.337308	0.391758	0	0	0	0	0	0	0	0	0	0	0	0	0	0	0	0	0	0	0	0	0	0	0
FBtr0070948	3.54514	1.89662	1.59893	1.33291	2.16574	2.49038	2.34445	1.58171	1.32911	1.11514	1.45841	1.0363	1.3312	1.6491	0.781423	0.720861	1.35228	0.989803	2.16673	1.14778	0.430414	0.373081	0.397981	0.347843	0.339164	0.273766	7	8	7	8	8	8	7	9	7	9	7	9	7	9	7	9	8	8	7	9	8	8	7
FBtr0070950	0.128444	0.0359449	0.353923	0.206948	0.80665	0.467752	0.484954	0.209894	0.376524	0.304681	0.166459	0.231518	0.257906	0.39316	0.224244	0.370987	0.290163	0.218631	0.201502	0.238204	0.604193	0.454199	0.636844	0.581661	0.638931	0.773732	0	1	0	1	3	2	2	3	1	3	1	3	3	2	1	4	2	4	2	4	2	2	1
FBtr0070952	0.464386	0.518363	0.605806	0.955546	1.53122	0.802083	0.624037	0.749894	1.07504	1.11438	1.26944	1.01627	0.868136	1.31937	0.824661	0.820576	1.42285	1.3772	2.10057	1.69961	0.470757	0.337177	0.460365	0.249802	0.605779	0.239472	0	0	0	0	0	0	0	0	0	0	0	0	0	0	0	0	0	0	0	0	0	0	0
FBtr0070953	0.392338	0.233436	0.434313	0.265418	1.13651	0.973671	1.27597	0.950467	0.699564	0.881809	0.614025	0.661379	0.937299	0.61402	1.0382	0.774644	0.632573	0.466288	0.713607	0.500498	0.377173	0.421861	0.483933	0.510601	0.570072	0.679755	0	0	0	0	0	0	0	0	0	0	0	0	0	0	0	0	0	0	0	0	0	0	0
FBtr0070955	0.324283	0.112991	0.207212	0.368001	0.23223	0.0598295	0.0657342	0.0447677	0.234729	0.205612	0.258877	0.218749	0.337536	0.316847	0.583723	0.857359	0.0256873	0.66735	0.0160316	5.2015	0.745562	1.94567	0.388592	0.722265	0.516001	1.02875	0	0	0	0	0	0	0	0	0	0	0	0	0	0	0	0	0	0	0	0	0	0	0
FBtr0070956	0.572027	0.384879	0.543914	0.330828	0.282306	0.221991	0.541229	0.527164	0.448178	0.613002	0.277216	0.396638	0.935175	0.967555	0.557557	0.564719	0.436599	0.467993	0.371197	0.398983	0.380762	0.419261	0.301747	0.338295	0.27999	0.346498	2	1	1	2	2	1	1	2	1	1	1	2	2	1	1	2	2	1	1	2	2	1	1
FBtr0070959	0.602967	0.431199	0.573393	0.973586	1.14192	1.42952	1.5135	0.935861	0.919009	1.41139	1.22406	0.350704	0.98587	2.28286	0.556087	1.31694	0.512254	0.530499	0.654464	0.57806	0.395488	0.58613	0.370364	0.501056	0.473176	0.432973	5	6	5	6	7	5	5	7	7	5	5	7	6	5	5	6	4	5	3	6	7	2	2
FBtr0070960	1.20707	0.780416	0.239489	0.172534	1.13308	1.78446	1.71739	1.36952	1.79885	0.808315	1.64411	2.17179	2.62869	1.49896	1.70182	0.888985	1.52368	1.70266	1.76297	1.69584	0.396579	0.470954	0.452286	0.621872	0.571702	0.684547	0	0	0	0	0	0	0	0	0	0	0	0	0	0	0	0	0	0	0	0	0	0	0
FBtr0070961	1.0154	0.766217	0.724161	0.387958	0.346044	0.385363	0.329239	0.525022	0.514944	0.656038	0.432358	0.508309	0.324403	0.730065	0.871341	0.763102	0.270949	0.3186	0.264926	0.359069	0.527233	0.326972	0.473292	0.279198	0.545802	0.346855	0	1	0	1	0	0	0	0	0	0	0	1	0	0	0	0	0	0	0	0	0	2	0
FBtr0070963	0.445516	0.376105	1.05179	0.768687	1.62352	1.02001	1.32436	1.50403	0.966872	0.979667	0.741153	0.647725	1.36116	1.33206	1.32061	1.11305	1.55196	1.32775	1.35165	1.20228	0.315122	0.338151	0.406351	0.435581	0.451295	0.515155	0	0	0	0	0	1	0	1	0	1	0	1	0	1	0	1	0	1	0	1	0	0	0
FBtr0070969	0.173099	1	0.196274	0.0855621	0.472997	0.31354	0.631714	0.609044	0.0980632	0.0878508	0.107104	0.19984	0.122065	0.099622	0.0937127	0.0487191	0.11597	0.22185	0.128383	1.07703	0.865095	1.03267	0.786686	0.93919	0.602801	0.787068	0	0	0	0	0	0	0	0	0	0	0	0	0	0	0	0	0	0	0	0	0	0	0
FBtr0070970	0.172243	0.278376	0.272341	0.464501	0.572528	0.689928	0.661433	0.603937	0.260455	0.675679	0.440375	0.426403	0.30184	0.521926	0.430416	0.490348	0.505527	0.62745	0.413836	0.65412	0.378202	0.241862	0.488078	0.308607	0.558427	0.352988	1	0	0	1	1	0	0	1	1	0	0	1	1	0	0	1	1	0	0	1	1	0	0
FBtr0070972	1.23647	1.09356	0.235106	0.698603	0.719372	0.664983	0.619879	0.693419	0.349225	0.445493	0.319365	0.271513	0.526793	1.1993	0.343141	0.282589	0.436708	0.335184	0.347968	0.32922	0.573803	0.554661	0.641573	0.431111	0.587144	0.259613	2	2	2	2	1	2	1	2	2	2	2	2	2	2	2	2	2	2	2	2	2	2	2
FBtr0070973	1	1	1	1	1.02425	0.207895	0.609162	0.338225	0.183371	3.7168	0.0961639	0.170759	0.927522	0.0193212	1.09955	0.477252	3.37934	1	1	1	0.872947	1.19529	0.654583	1.25832	0.219945	0.664632	0	0	0	0	0	0	0	0	0	0	0	0	0	0	0	0	0	0	0	0	0	0	0
FBtr0070974	0.760522	0.550333	0.782692	0.551664	1.11035	0.752655	0.93282	0.494017	0.491777	0.754613	0.564654	0.57336	0.252171	0.737342	0.364542	0.878951	0.546127	0.569263	0.682703	0.754432	0.39981	0.193416	0.295874	0.183147	0.180407	0.193385	2	3	2	3	2	3	2	3	2	3	2	3	2	2	1	3	2	3	2	3	2	3	2
FBtr0070980	0.110998	0.113902	0.252912	0.143885	0.463838	0.448089	0.433768	0.201572	0.154895	0.115232	0.203176	0.200412	0.329643	0.171887	0.169779	0.197064	0.219625	0.106179	0.246083	0.12747	0.452408	0.55114	0.543665	0.61744	0.523354	0.669596	0	0	0	0	0	0	0	0	0	0	0	0	0	0	0	0	0	0	0	0	0	0	0
FBtr0070984	0.330987	6.04657	0.293274	0.548776	1.34823	0.705786	0.7137	1.46933	1.18677	0.473503	0.517081	1.26975	0.94059	1.21379	1.69842	0.863144	0.525624	0.736154	0.519573	1.26464	0.583059	1.12899	0.607041	1.22219	0.728871	1.18606	0	0	0	0	0	0	0	0	0	0	0	0	3	2	2	3	2	2	2	2	2	1	1
FBtr0070987	0.0197963	0.0110385	0.339223	0.0873859	0.400489	0.728377	0.650335	0.446118	0.354587	0.421743	0.615359	0.620677	0.71525	1.10599	0.925895	0.881199	0.358867	0.400937	0.301633	0.33308	0.551648	0.673363	0.574144	0.739305	0.735989	1.04573	0	0	0	0	1	0	0	1	1	1	1	1	1	1	1	1	1	1	1	1	1	1	1
FBtr0070988	0.194219	0.176378	0.308052	0.270168	0.456897	0.347603	0.447165	0.218459	0.379112	0.463132	0.335865	0.423384	0.217497	0.506449	0.267708	0.420189	0.196163	0.189431	0.191747	0.206502	0.343864	0.387189	0.276745	0.361011	0.355574	0.291249	10	11	9	12	12	12	10	14	11	13	10	14	13	13	12	14	14	11	10	15	11	13	10
FBtr0070989	0.0583097	0.423285	0.457929	1.01947	0.726604	1.11683	0.743806	1.07514	0.458304	0.545635	0.490782	0.421305	0.557245	0.543548	0.513866	0.695099	0.674048	0.944536	0.942427	0.746912	0.419204	0.357588	0.5079	0.439358	0.644727	0.358812	0	0	0	0	0	0	0	0	0	0	0	0	0	0	0	0	0	0	0	0	0	0	0
FBtr0070990	2.01141	1.2865	1.66814	1.12531	1.5728	1.45675	1.58615	1.59719	1.10253	1.18861	0.858658	0.782259	2.93543	1.17308	2.02904	1.36588	1.78106	1.43163	1.85789	1.09457	0.322884	0.184574	0.283626	0.228786	0.120236	0.149942	4	3	3	4	4	2	1	5	1	3	0	4	4	1	0	5	4	3	3	4	5	4	2
FBtr0070991	1.8444	0.471732	0.689694	0.548656	1.01801	0.495436	0.800348	0.627824	0.361505	0.390105	0.483313	0.386277	0.567282	0.62331	0.5431	0.519235	0.39707	0.335609	0.420672	0.330344	0.626402	0.232256	0.614519	0.191591	0.480018	0.129133	0	0	0	0	0	0	0	0	0	0	0	0	0	0	0	0	0	0	0	0	0	0	0
FBtr0070992	0.759215	0.59306	2.0241	1.34899	1.77058	1.61549	1.4829	1.93066	1.35613	1.22639	1.26468	1.07568	2.4342	1.3064	1.99148	1.76528	1.94772	2.45177	1.76827	1.71079	0.283124	0.340622	0.302639	0.353811	0.362239	0.41628	1	1	1	1	1	1	1	1	1	1	1	1	1	1	1	1	1	1	1	1	1	1	1
FBtr0070993	1.06705	0.979094	1.5467	1.09299	1.25922	0.800452	0.970919	0.88672	0.60928	1.15634	0.522043	0.663553	1.25298	0.800742	0.822601	0.917276	1.37271	1.34384	1.3135	1.34056	0.315209	0.231389	0.389532	0.198215	0.209659	0.133531	0	0	0	0	0	0	0	0	0	0	0	0	0	0	0	0	0	0	0	0	0	0	0
FBtr0070994	0.75857	0.187849	0.395704	0.183439	0.343452	0.466276	0.439041	0.344879	0.398264	0.435917	0.280629	0.406195	0.378529	0.685615	0.328797	0.481539	0.299754	0.288933	0.27568	0.310802	0.360308	0.3979	0.383584	0.368188	0.386308	0.461146	1	1	1	1	1	1	1	1	1	1	1	1	1	1	1	1	1	1	1	1	1	1	1
FBtr0071003	0.183604	0.0397605	0.516938	0.300081	0.105561	0.528558	0.780123	0.777646	1.18202	0.632198	0.909772	0.47505	0.469918	0.628808	0.406546	0.540839	0.757726	0.616867	0.140618	0.668026	0.656183	0.406638	0.688596	0.566297	0.786248	0.766363	0	0	0	0	0	0	0	0	0	0	0	0	0	0	0	0	0	0	0	0	0	0	0
FBtr0071004	0.917107	3.17896	0.959089	0.900728	1.21307	1.32634	1.11122	0.928635	0.529778	0.592003	0.546721	0.433735	0.786425	0.557177	0.963665	0.683615	1.31441	1.5394	1.20511	1.11272	0.283703	0.713317	0.323902	0.819076	0.130411	0.682688	0	0	0	0	0	0	0	0	0	0	0	0	0	0	0	0	0	0	0	0	0	0	0
FBtr0071005	1.32062	2.5407	0.906871	1.387	2.18204	1.68177	2.15556	1.09573	0.957579	1.62634	2.12274	1.52531	1.39441	2.30323	2.56884	1.27133	2.24723	2.16558	2.50326	1.83871	0.342139	0.268389	0.382605	0.296531	0.385197	0.372225	2	1	1	2	2	1	1	2	2	1	1	2	2	1	1	2	2	1	1	2	2	1	1
FBtr0071007	0.323588	0.713989	1.36145	1.20014	0.84348	1.37309	0.591883	1.14282	0.324573	0.264505	0.322194	0.158641	0.587118	0.310544	0.528655	0.411564	0.710681	0.498838	0.526025	0.366126	0.513904	0.682277	0.662052	0.633077	0.566459	0.25283	1	1	1	1	1	1	1	1	1	1	1	1	1	1	1	1	1	1	1	1	1	1	1
FBtr0071009	0.236363	0.14215	1.0777	0.625349	1.40264	1.45223	1.26195	1.58262	0.564395	0.825443	0.657086	0.741133	0.75206	0.465146	0.6617	0.757276	1.29925	1.26965	1.41255	1.12155	0.440307	0.504281	0.521297	0.602091	0.525555	0.72132	0	0	0	0	0	0	0	0	0	0	0	0	0	0	0	0	0	0	0	0	0	0	0
FBtr0071010	0.773276	1.16715	2.69604	1.20745	0.720299	0.429413	0.0864187	0.0444322	0.015821	1	0.107338	1	0.588212	0.0473662	0.848785	1	0.0167312	1	1.1462	0.0520889	1.15547	0.709036	1.38811	0.577439	1.05582	0.801845	0	1	0	1	0	1	0	1	0	0	0	0	0	0	0	0	0	0	0	0	0	0	0
FBtr0071013	0.496533	5.75262	2.65332	0.459508	0.847619	1.07398	1.28472	0.82845	0.395632	0.340302	0.402225	0.987524	1.19814	0.561857	0.905112	0.632446	0.62832	0.430521	0.426688	0.508554	0.745668	1.41053	0.861744	1.31382	0.715765	1.23012	0	0	0	0	0	0	0	0	0	1	0	1	2	2	2	2	2	2	2	2	2	2	2
FBtr0071015	2.58958	0.427982	0.769759	0.21626	1.03273	0.265815	0.897569	0.373142	0.493931	0.169644	0.582895	0.247914	0.664452	0.285505	0.464813	0.246326	0.942001	0.315822	1.02933	0.267678	0.64888	0.266313	0.729893	0.345564	0.643958	0.302116	2	2	2	2	2	1	1	2	1	0	0	1	2	0	0	2	1	0	0	1	2	0	0
FBtr0071017	0.0530102	0.0378563	0.340852	0.596819	1.3968	1.19701	0.996726	0.578124	0.709383	0.810289	0.88426	0.683679	0.18426	0.373435	0.487042	0.511511	0.449039	0.475756	0.497814	0.286273	0.67372	0.562368	0.656733	0.578668	0.877259	0.786119	1	1	1	1	3	5	2	6	2	5	1	6	3	4	1	6	3	5	2	6	3	5	2
FBtr0071019	0.381997	0.478228	0.764805	0.637983	0.811328	0.37905	0.566286	0.331231	0.860576	0.715088	0.727041	0.850427	1.30607	0.83529	1.11941	0.763694	0.802326	0.814995	0.741822	0.626367	0.319635	0.294821	0.26169	0.359106	0.3124	0.296792	0	0	0	0	0	0	0	0	0	0	0	0	0	0	0	0	0	0	0	0	0	0	0
FBtr0071020	0.588635	0.75607	0.739853	0.414393	0.252852	0.219186	0.216656	0.112431	0.265461	0.610626	0.164858	0.281303	0.198799	0.249475	0.298679	0.241998	0.403541	0.567359	0.424836	0.368694	0.523228	0.533615	0.631281	0.614752	0.569439	0.75318	1	1	1	1	1	1	1	1	1	1	1	1	1	1	1	1	1	1	1	1	1	1	1
FBtr0071032	0.17812	0.494102	0.783471	0.675009	2.49876	1.89667	1.46364	0.837623	0.811787	0.730465	1.14679	0.79499	0.9059	1.53331	0.417361	0.82132	0.880394	0.863087	0.678482	0.869009	0.656723	0.447976	0.687622	0.553098	0.808302	0.645292	0	0	0	0	0	0	0	0	0	0	0	0	0	0	0	0	0	0	0	0	0	0	0
FBtr0071033	0.919472	0.918249	0.882134	0.672767	0.807693	0.524407	0.938665	0.55479	0.658273	0.515874	0.737564	0.439729	0.811227	0.692337	0.985061	0.728524	1.53343	1.23541	1.30717	0.868213	0.279195	0.334714	0.133881	0.283729	0.0652113	0.268086	0	0	0	0	0	0	0	0	0	0	0	0	0	0	0	0	0	0	0	0	0	0	0
FBtr0071035	0.323976	1.07813	0.578451	0.524097	0.879371	1.28966	1.53987	1.62233	1.63096	0.599285	0.990019	1.3692	1.16309	1.30996	1.13608	1.46364	0.926935	0.165173	0.646974	2.61362	0.417382	0.567496	0.522369	0.405938	0.631759	0.408525	0	0	0	0	0	0	0	0	0	0	0	0	0	0	0	0	0	0	0	0	0	0	0
FBtr0071036	0.430066	3.183	0.552079	0.907575	1.70713	1.34873	2.07139	0.519042	0.611169	1.02833	1.34526	1.23428	1.43289	1.65879	1.01677	0.69205	1.35786	1.17148	1.43198	0.90079	0.446344	0.592525	0.613426	0.681574	0.690943	0.791309	2	3	2	3	3	3	3	3	3	3	3	3	3	3	3	3	3	3	3	3	3	3	3
FBtr0071038	1.27402	0.955253	0.961687	1.26823	1.5328	1.88802	1.35366	1.67577	0.784757	0.856829	0.596637	0.917069	1.31453	0.993379	0.815086	0.797005	1.42384	1.28486	1.30014	1.16929	0.280473	0.305612	0.33322	0.344132	0.186274	0.287926	0	0	0	0	0	0	0	0	0	0	0	0	0	0	0	0	0	0	0	0	0	0	0
FBtr0071039	0.955896	0.630446	0.521418	0.607473	1.22078	1.67193	1.25575	1.44957	0.442182	0.779787	0.619279	0.484389	0.395853	0.890521	1.13107	1.14779	0.682936	0.662352	0.566066	0.608332	0.424477	0.448715	0.427896	0.530253	0.342879	0.505892	0	1	0	1	0	0	0	0	0	0	0	0	1	0	0	1	0	0	0	0	0	0	0
FBtr0071041	0.532643	0.29311	0.936618	0.817525	0.576645	0.661184	0.504795	0.498594	0.989224	0.476159	0.349251	0.668864	0.701691	0.615182	0.804607	0.513727	1.4202	0.952073	1.05317	0.811401	0.406947	0.309241	0.395069	0.323855	0.315957	0.395688	1	1	1	1	0	1	0	1	1	1	1	1	1	1	1	1	1	1	1	1	1	1	1
FBtr0071042	0.448506	0.26157	1.10635	0.404911	0.584236	0.434929	0.980993	0.50033	0.828286	1.71541	0.658075	1.26024	0.585676	1.48551	0.707667	1.72245	0.575404	0.580542	0.471657	0.498325	0.310767	0.66254	0.325064	0.766698	0.402096	0.251686	3	3	3	3	2	3	2	3	3	2	2	3	3	3	3	3	3	3	3	3	2	2	2
FBtr0071046	0.140371	4.59493	0.440068	1	0.73034	0.711737	0.198145	0.041233	0.0157317	0.0405832	0.00697866	0.0158608	0.0771338	2.3219	0.250503	0.471804	0.0178786	0.0868607	0.0825674	9.19896	1.17611	1.59983	1.10152	1.66475	0.71264	1.2887	0	0	0	0	0	0	0	0	0	0	0	0	0	0	0	0	0	0	0	0	0	0	0
FBtr0071047	1.61353	0.838294	1.51625	0.445706	0.968601	0.689764	0.899874	0.932798	0.715182	0.348153	0.550057	0.180952	0.602749	0.339534	0.738875	0.386825	1.02842	0.644418	0.805168	0.498481	0.382122	0.451222	0.412232	0.514476	0.293975	0.292207	0	0	0	0	0	0	0	0	0	0	0	0	0	0	0	0	0	0	0	0	0	0	0
FBtr0071048	0.644473	2.68357	1.33808	1.514	2.07946	1.52921	2.02009	0.658095	1.34306	1.90925	1.9017	1.18106	3.62402	4.22337	2.9668	2.14191	1.30224	0.799749	0.923992	0.973411	0.506332	0.607165	0.35616	0.433408	0.443251	0.520854	1	3	1	3	2	2	1	3	1	2	1	2	1	3	1	3	2	4	2	4	1	4	1
FBtr0071049	0.908454	1.19829	1.37354	1.38433	0.70937	0.362038	0.49	0.241801	0.91631	0.829931	1.1801	1.04622	0.245056	0.451742	0.697375	0.691682	0.55317	0.618732	0.628072	0.722423	0.433488	0.487111	0.340915	0.544012	0.432577	0.725995	5	5	5	5	3	5	3	5	0	3	0	3	1	2	1	2	4	4	3	5	6	6	6
FBtr0071051	0.0411099	0.0703513	0.0392682	0.102393	0.054689	0.276292	0.250119	0.24114	0.3113	0.136511	0.143869	0.133319	0.171921	0.737243	0.326033	0.559094	0.290825	0.0187176	0.0798371	0.490498	0.678865	0.867943	0.836849	0.505642	1.06731	0.587559	0	0	0	0	0	0	0	0	0	0	0	0	0	0	0	0	0	0	0	0	0	0	0
FBtr0071054	0.237173	8.53258	0.235134	1.53657	1.84758	0.219757	0.128373	2.36022	0.0247317	0.00629758	0.00716419	0.00399652	0.838053	1.12661	0.427732	0.450465	0.245814	0.610305	0.214846	2.05531	1.31753	1.50563	1.71646	1.55865	1.34829	1.16597	0	0	0	0	0	0	0	0	0	0	0	0	0	0	0	0	0	0	0	0	0	0	0
FBtr0071055	1	1	1	6.34175	0.181941	1	0.0764943	0.0722924	1	6.13886	0.09241	1	1.56431	1.73657	2.67705	0.0185644	3.98647	2.00364	7.77447	4.87252	1.23653	1.00525	0.86844	1.09921	0.893692	1.35922	0	0	0	0	0	0	0	0	0	0	0	0	0	0	0	0	0	0	0	0	0	0	0
FBtr0071056	1	1	0.151972	1	1	1	0.146547	1	0.00296101	0.0229178	0.0142816	0.00824936	0.914167	0.0446834	0.200559	0.312991	1	1	1	44.1278	0.861905	2.78142	1.24311	0.756662	0.854778	0	0	0	0	0	0	0	0	0	0	0	0	0	0	0	0	0	0	0	0	0	0	0	0
FBtr0071057	0.335263	3.72679	1.45983	8.34165	1.03489	1.08974	1.24055	1.49347	2.37295	2.7657	0.596246	0.501406	1.01582	0.390983	0.777416	0.386202	1.25342	1.55938	1.69661	1.08223	0.493386	1.13908	0.612265	0.962082	0.478444	0.908506	0	0	0	0	1	0	0	1	0	0	0	0	0	1	0	1	0	0	0	0	0	0	0
FBtr0071058	0.0886325	28.4309	1.63603	37.9277	1.37051	2.38313	2.956	2.72993	2.1278	1.99936	0.0185269	4.46145	540.334	1.71852	1.90137	0.017716	4.92967	2.19039	2.83697	2.28642	3.04993	1.579	0.842753	1.22779	0.777145	1.01303	0	0	0	0	0	0	0	0	0	0	0	0	0	0	0	0	0	0	0	0	0	0	0
FBtr0071059	1	14.3526	1	1	1	0.932424	3.74593	3.50341	0.759482	1.72197	1	60.8237	1.34968	2.61231	2.98291	0.00945004	4.49911	2.95253	3.05356	2.94523	0.680263	2.0498	0.807515	1.72229	0.814099	1.29034	0	0	0	0	0	0	0	0	0	0	0	0	0	0	0	0	0	0	0	0	0	0	0
FBtr0071060	0.0510384	1	0.0961334	1	1	1	0.388217	0.428638	36.0729	27.716	56.5048	39.8546	1.76564	33.0446	0.581477	0.00874658	1.71585	3.305	1.85205	2.01653	1.97273	1.45217	1.56656	1.47325	1.13877	0.333288	0	0	0	0	0	0	0	0	0	0	0	0	0	0	0	0	0	0	0	0	0	0	0
FBtr0071063	0.155541	0.168963	1	1	0.319057	1	0.207452	1	0.00385443	0.00691437	0.021482	0.0019495	0.381122	2.24441	0.192566	0.198434	0.081114	1	1	2.99195	1.09864	1.02966	1.29942	0.979441	0.932915	0.524485	0	0	0	0	0	0	0	0	0	0	0	0	0	0	0	0	0	0	0	0	0	0	0
FBtr0071064	0.0490438	1	1	1	1	0.0538357	1.74194	0.63532	0.0284431	0.0587564	0.156245	0.0580239	0.609282	0.0219131	0.390186	0.267543	0.0241206	1	1	147.313	0.960268	3.06737	1.0516	1.00348	0.732	0.664456	0	0	0	0	0	0	0	0	0	0	0	0	0	0	0	0	0	0	0	0	0	0	0
FBtr0071065	2.02194	1.11875	2.53595	1.70577	1.44053	1.16891	1.57202	1.30487	1.64824	1.00191	1.60657	1.22491	1.03022	0.781137	2.17399	1.23998	2.29689	1.96886	1.81326	1.88212	0.247229	0.289355	0.22615	0.1942	0.262021	0.200831	0	0	0	0	0	0	0	0	0	0	0	0	0	0	0	0	0	0	0	0	0	0	0
FBtr0071066	0.850112	0.591576	1.37877	1.10117	0.92935	0.77939	0.879989	0.679016	0.447277	0.634378	0.703676	0.789136	0.206316	0.3975	0.628336	1.09409	0.433091	0.835408	0.371601	0.599769	0.501903	0.295337	0.354147	0.240624	0.245951	0.282522	3	4	2	5	6	5	5	6	3	1	1	3	4	5	3	6	5	1	1	5	3	5	2
FBtr0071067	0.0758077	1	0.0812853	1.10568	1.03402	0.479206	0.117559	0.205343	0.0168129	0.0322532	0.0863259	0.0529012	0.689725	18.686	0.481042	0.494335	0.072892	1	3.23928	2.28445	1.68068	2.25518	1.66875	0.987683	1.44146	0.612694	0	0	0	0	0	0	0	0	0	0	0	0	0	0	0	0	0	0	0	0	0	0	0
FBtr0071070	0.0830311	0.0709047	0.178977	0.32005	0.766823	0.541087	0.647794	0.497674	0.252632	0.307182	0.343606	0.309646	0.207243	0.401053	0.245723	0.3125	0.309647	0.322623	0.388254	0.253293	0.620533	0.389559	0.71567	0.490752	0.807653	0.597639	0	0	0	0	0	0	0	0	0	0	0	0	0	0	0	0	0	0	0	0	0	0	0
FBtr0071071	0.283218	0.194495	0.532512	0.817487	1.13885	1.15468	1.17457	0.698661	0.707065	0.871325	0.717545	0.764584	0.639836	0.943302	0.755496	0.825761	0.640998	0.860949	0.719277	0.942706	0.359345	0.307313	0.456072	0.419186	0.56808	0.55549	1	1	1	1	2	1	1	2	1	1	1	2	1	1	1	2	2	1	1	2	2	1	1
FBtr0071072	0.281157	0.322143	1.23453	1.51315	1.69149	1.62539	1.31674	1.74692	1.5551	1.40382	0.936417	1.40363	1.50483	1.1959	1.50418	1.066	1.76198	2.07407	1.57866	1.55524	0.330361	0.336996	0.43451	0.384788	0.530907	0.507036	0	1	0	1	0	1	0	1	0	1	0	1	0	1	0	1	0	1	0	1	0	1	0
FBtr0071073	1.05518	0.859537	1.21025	0.780641	1.08982	1.2439	1.4039	1.60331	0.677532	0.896681	0.866272	0.659841	0.543106	0.818254	0.56136	0.684415	1.006	1.13242	0.959293	1.05221	0.298363	0.29928	0.242706	0.348839	0.13234	0.338231	0	0	0	0	0	0	0	0	0	0	0	0	0	0	0	0	0	0	0	0	0	0	0
FBtr0071075	0.311819	1	0.472582	0.308131	0.651614	0.092684	1	1	0.270725	1	0.123358	1	1	1	0.0621105	0.218303	0.468049	1	0.106574	1	0.772892	0.507589	0.669596	0.570564	0.484906	0.782983	0	0	0	0	0	0	0	0	0	0	0	0	0	0	0	0	0	0	0	0	0	0	0
FBtr0071076	0.23129	0.151968	0.374959	0.297645	0.683723	0.414341	0.491999	0.299478	0.222168	0.168297	0.214987	0.151626	0.18093	0.210223	0.208812	0.239562	0.303222	0.253374	0.323533	0.196815	0.488924	0.345031	0.510796	0.434305	0.429387	0.369544	1	1	1	1	1	1	1	1	1	1	1	1	1	1	1	1	1	1	1	1	1	1	1
FBtr0071077	0.48242	0.62219	0.788825	1.31656	1.70999	1.07854	0.826052	0.373242	0.851714	1.15533	1.12646	0.976173	0.798204	0.939854	1.30687	1.04361	1.28366	1.41151	1.50582	1.15951	0.357195	0.307905	0.434373	0.38525	0.555121	0.50472	0	0	0	0	0	0	0	0	0	0	0	0	0	0	0	0	0	0	0	0	0	0	0
FBtr0071078	0.777378	11.6291	0.855851	19.3972	0.758156	0.776461	1.12977	0.575038	0.300479	0.441947	0.548563	0.644346	3.43269	12.2214	0.608378	0.259564	0.390299	0.335143	0.485118	0.332325	0.982733	1.50924	0.38642	1.44863	0.194944	1.12854	0	0	0	0	0	0	0	0	0	0	0	0	0	0	0	0	0	0	0	0	0	0	0
FBtr0071079	1.95465	1.20219	0.969272	1.28317	3.4086	1.937	4.81239	2.50278	3.5112	3.22032	2.84587	1.8103	1.68334	4.64032	3.36637	2.47641	1.26622	1.27854	1.29146	1.18637	0.502964	0.515098	0.457686	0.384297	0.603618	0.35265	2	2	2	2	2	1	1	2	2	2	2	2	2	2	2	2	2	2	2	2	2	2	2
FBtr0071081	0.0519664	8.3149	2.67714	10.8474	0.585979	4.89318	2.92072	20.7985	0.0293568	0.0026162	0.0142493	0.00134036	0.175992	28.0289	0.165536	0.211299	0.568215	1	0.160217	1.64009	1.50771	1.28995	1.3152	1.04971	0.931213	0.609975	0	0	0	0	0	0	0	0	0	0	0	0	0	0	0	0	0	0	0	0	0	0	0
FBtr0071083	0.536614	3.52914	0.712921	2.12343	0.287143	0.693913	0.621522	1.28211	0.160899	0.690906	0.196517	0.391986	0.828416	1.29895	0.444078	0.866201	0.490001	0.917633	0.71518	1.70967	0.458254	0.684382	0.559089	0.819103	0.339218	0.645052	0	0	0	0	0	0	0	0	0	0	0	0	0	0	0	0	0	0	0	0	0	0	0
FBtr0071087	0.315636	1	0.23314	1	1	1	0.466355	0.18924	0.274239	1	0.0821652	1	0.087327	0.106735	0.0208431	0.0673423	1.1575	0.114313	1.12918	0.254346	0.939436	0.789675	0.812807	0.382705	0.684055	0.508435	0	0	0	0	0	0	0	0	0	0	0	0	0	0	0	0	0	0	0	0	0	0	0
FBtr0071088	1	0.547139	1	0.503287	0.452643	0.22718	1.66362	0.0643157	0.404218	1	1	1	1	1	1	1	1	1	1	0.195945	0.3625	0.597293	0.499632	0.693953	0.481522	0.684541	0	0	0	0	0	0	0	0	0	0	0	0	0	0	0	0	0	0	0	0	0	0	0
FBtr0071089	0.778728	0.795799	0.521053	0.61707	0.763204	0.775402	0.704796	0.661503	0.478204	0.695648	0.607641	0.672929	0.602676	0.729779	0.624827	0.503982	0.830534	0.658513	0.89715	0.657383	0.200264	0.122079	0.196901	0.0983752	0.170954	0.121835	1	2	1	2	1	2	1	2	0	1	0	1	1	1	1	1	1	1	1	1	1	1	1
FBtr0071090	1.1691	1.12939	1.26202	1.63724	1.4268	1.57995	0.844325	1.99724	1.06896	1.26861	1.06845	0.796153	0.752162	0.89988	1.09734	1.26647	1.50424	1.92421	1.57962	1.39938	0.229991	0.28802	0.173498	0.302815	0.208573	0.224488	0	0	0	0	0	0	0	0	0	0	0	0	0	0	0	0	0	0	0	0	0	0	0
FBtr0071091	0.24648	0.166647	1.26693	0.760088	1.26391	1.55613	1.33218	1.64794	1.07733	1.13567	0.602186	0.750743	1.99918	1.41894	1.20221	1.19667	1.01326	0.86036	0.63833	0.742817	0.455232	0.44364	0.457882	0.557262	0.507651	0.679415	0	0	0	0	0	1	0	1	0	1	0	1	0	1	0	1	0	1	0	1	0	0	0
FBtr0071092	0.0447001	0.0595032	0.261326	0.699249	0.815842	0.877284	0.81912	0.705138	0.522789	0.873298	0.457622	0.59428	0.144277	0.613676	0.292173	0.516535	0.432682	0.523192	0.4614	0.503773	0.601129	0.38985	0.627769	0.47646	0.811328	0.615284	1	2	0	3	5	5	4	6	5	5	4	6	5	5	4	6	5	5	4	6	4	4	4
FBtr0071093	1.55725	1.00471	2.79202	1.75751	1.65894	1.096	1.15881	1.26825	1.15143	1.11435	1.15133	1.20535	1.0645	0.959775	1.09232	1.4605	1.71539	1.73592	1.42201	1.6043	0.354121	0.226094	0.402775	0.216724	0.391183	0.26182	1	2	1	2	1	2	1	2	0	2	0	2	1	2	1	2	0	2	0	2	1	2	1
FBtr0071094	0.0892371	0.0564596	0.177298	0.107328	0.41332	0.346541	0.384995	0.147272	0.094976	0.0597283	0.105188	0.0871887	0.185372	0.0739157	0.0943365	0.0876548	0.196143	0.0711647	0.184191	0.0754421	0.608791	0.779753	0.709324	0.81548	0.593844	0.772426	0	0	0	0	0	0	0	0	0	0	0	0	0	0	0	0	0	0	0	0	0	0	0
FBtr0071096	0.197828	0.164702	0.288431	0.166249	0.421014	0.497159	0.34762	0.179175	0.10023	0.128621	0.155168	0.188131	0.182085	0.21794	0.112246	0.28478	0.191243	0.231722	0.251439	0.263518	0.457305	0.450633	0.484546	0.620658	0.300889	0.650011	0	0	0	0	0	0	0	0	0	0	0	0	0	0	0	0	0	0	0	0	0	0	0
FBtr0071099	0.211469	0.0841793	0.0235386	1	0.0276398	1	0.112718	1	0.378792	0.00780773	0.126038	0.0753623	0.0689725	1	0.33259	0.0905841	1	0.024326	0.0340974	1	1.28605	0.942643	0.909392	0.980966	0.943501	0.593883	0	0	0	0	0	0	0	0	0	0	0	0	0	0	0	0	0	0	0	0	0	0	0
FBtr0071101	1.49843	1.13801	1.50269	1.9603	1.85752	1.66291	1.49341	1.05123	1.69963	1.3454	2.71214	1.46093	1.77382	1.20492	1.28823	0.862469	1.90243	1.71349	1.89531	1.47644	0.222729	0.241372	0.263642	0.235472	0.113166	0.297872	0	0	0	0	0	0	0	0	0	0	0	0	0	0	0	0	0	0	0	0	0	0	0
FBtr0071105	2.49506	2.40256	1.18842	1.70792	1.8388	1.68235	2.29993	1.99323	2.28626	1.98548	1.84231	2.86319	1.72673	2.35424	1.49328	1.37638	0.964927	0.870408	0.954217	0.929488	0.324981	0.352653	0.238263	0.215167	0.296971	0.172152	0	0	0	0	0	0	0	0	0	0	0	0	0	0	0	0	0	0	0	0	0	0	0
FBtr0071106	0.134148	0.564146	0.481067	2.71324	0.377007	0.94759	0.49234	0.108324	0.0517033	0.00576537	0.0497542	0.0435496	0.203102	0.114969	0.168625	0.307693	0.133058	1	0.0273348	2.38818	0.830625	1.19925	0.793288	1.42148	0.448094	1.05183	0	0	0	0	1	0	0	1	0	0	0	0	0	0	0	0	0	0	0	0	0	0	0
FBtr0071107	0.514017	0.388685	0.595211	0.93424	1.46179	1.39136	1.92082	2.29258	2.3701	1.25276	1.01796	0.995446	1.84114	2.55515	1.55556	1.24341	1.54285	1.28954	1.49895	1.2681	0.405476	0.464345	0.564659	0.52348	0.608485	0.64385	0	0	0	0	0	0	0	0	0	0	0	0	0	0	0	0	0	0	0	0	0	0	0
FBtr0071109	3.58713	2.49531	1.64896	1.10555	0.320241	0.206004	0.59912	0.627272	0.623298	0.645031	0.762626	0.33201	0.322512	0.723156	0.357237	0.350551	0.73851	0.903382	0.979957	0.920666	0.999122	0.783754	0.97698	0.931785	0.962077	0.897469	8	7	5	10	7	8	5	10	5	5	3	7	2	5	1	7	7	5	4	8	6	6	5
FBtr0071112	5.78738	2.99552	3.13246	1.45715	1.05128	0.511207	1.65007	0.860027	1.00942	1.09417	1.61975	2.04909	0.915953	0.977102	1.5528	1.33975	1.34264	1.3413	1.55058	1.28642	0.755692	0.499356	0.774786	0.60529	0.726657	0.754251	5	5	5	5	5	5	5	5	1	2	1	2	4	4	4	4	4	3	3	4	4	4	4
FBtr0071116	0.250508	4.42518	1.31427	0.87796	1.7586	1.14887	1.77431	1.51506	2.99616	3.28084	0.856555	0.497389	1.90862	1.2897	1.30464	0.961222	1.68995	1.75564	2.05222	1.55064	0.461735	0.697703	0.628136	0.790986	0.561153	0.824969	0	0	0	0	0	0	0	0	0	0	0	0	0	0	0	0	0	0	0	0	0	0	0
FBtr0071117	0.725531	0.86857	0.79564	1.24446	1.29485	1.25339	0.937487	0.643264	0.829857	1.19443	0.831174	0.916066	0.645371	1.08265	0.754261	0.810351	0.73266	0.878239	0.75016	0.787636	0.218358	0.219375	0.226158	0.244479	0.270122	0.298431	2	3	2	3	3	3	3	3	2	3	2	3	2	3	2	3	3	3	3	3	3	3	3
FBtr0071123	0.186103	0.0856813	1.99793	0.459146	0.972514	0.210912	1.5309	0.0917063	3.70592	1.1302	1.72723	1.42802	2.83889	1.52429	3.01834	1.32155	2.48596	2.43935	2.68839	2.28208	0.495053	0.79072	0.699558	1.01345	0.665161	0.824366	0	0	0	0	0	0	0	0	0	0	0	0	0	0	0	0	0	0	0	0	0	0	0
FBtr0071124	1	0.211827	0.208679	0.0962108	0.145018	0.118369	0.431184	1	1.54168	0.932536	0.516799	0.355699	0.303379	0.174552	0.684688	1.38098	0.535464	0.179455	0.357776	27.2334	0.734852	2.67262	0.835594	0.903806	0.871847	1.21101	0	0	0	0	0	0	0	0	0	0	0	0	0	0	0	0	0	0	0	0	0	0	0
FBtr0071125	0.371335	0.144613	0.370415	0.457396	0.56441	0.53328	0.604561	0.522012	0.436374	0.446311	0.195101	0.288597	0.417319	0.473101	0.299372	0.342817	0.28074	0.238163	0.263635	0.198678	0.343105	0.38632	0.350879	0.381555	0.260452	0.441416	2	1	1	2	2	1	1	2	2	1	1	2	2	1	1	2	2	1	1	2	2	1	1
FBtr0071127	0.144254	1	0.294129	0.306172	1.62462	0.229863	0.16641	0.28753	0.693401	0.791908	0.355668	0.59784	0.426269	1.19842	0.658248	0.977608	0.123839	0.195555	0.0606695	1.10557	1.02299	0.587395	1.03213	0.586255	1.28208	0.798854	0	0	0	0	0	0	0	0	0	0	0	0	0	0	0	0	0	0	0	0	0	0	0
FBtr0071129	2.06861	1.81586	1.64025	1.22168	1.55329	1.6499	1.38082	1.45587	2.00148	0.813957	1.50126	2.0016	0.862375	0.935572	1.74573	0.995042	1.69349	1.80688	1.77534	1.78138	0.209768	0.295167	0.165743	0.287846	0.17613	0.166645	0	0	0	0	0	0	0	0	0	0	0	0	0	0	0	0	0	0	0	0	0	0	0
FBtr0071131	0.322391	0.59972	0.731124	0.655294	1.04698	0.866725	1.06732	0.723736	0.507987	0.540196	0.484924	0.603497	0.740779	0.519228	0.790968	0.655056	1.12882	0.929572	1.01627	0.890541	0.35728	0.212897	0.447617	0.175219	0.440472	0.162115	0	0	0	0	0	0	0	0	0	0	0	0	0	0	0	0	0	0	0	0	0	0	0
FBtr0071132	0.347111	0.299383	1.4741	2.59973	5.18043	7.84494	5.80215	6.2729	5.16901	5.11795	3.2201	3.29572	1.20993	3.23849	1.77917	1.51431	2.51141	2.59512	3.73943	3.48583	0.621408	0.616272	0.633396	0.641899	0.842361	0.806845	0	1	0	1	2	2	2	2	2	2	2	2	2	1	1	2	2	2	2	2	1	1	1
FBtr0071133	0.262567	0.252331	0.0730765	0.515809	1.53301	0.383669	0.314418	1.42649	0.0432681	0.0525156	0.272537	0.368137	1.18322	0.749279	0.433868	0.362	0.129136	0.193723	0.595554	0.123725	1.02504	0.901824	1.3406	0.959976	1.22082	0.825752	0	0	0	0	0	0	0	0	0	0	0	0	0	0	0	0	0	0	0	0	0	0	0
FBtr0071134	0.169335	0.164357	0.162557	0.0333755	0.245151	0.376464	0.497122	0.380051	0.231083	0.580603	0.507433	0.142086	0.312461	0.237692	0.145143	0.215731	0.663746	0.251074	0.698624	0.2203	0.581017	0.586119	0.524572	0.720748	0.584337	0.712374	0	0	0	0	0	1	0	1	1	3	1	3	6	6	6	6	2	3	0	5	4	1	1
FBtr0071135	0.139991	0.149009	0.266373	0.199988	0.461568	0.544908	0.447912	0.192908	0.136102	0.14924	0.228672	0.234296	0.301554	0.187768	0.179594	0.20496	0.255222	0.132854	0.261007	0.16055	0.420858	0.555506	0.515608	0.613955	0.46884	0.675468	0	0	0	0	0	0	0	0	0	0	0	0	0	0	0	0	0	0	0	0	0	0	0
FBtr0071140	1.24876	1.24235	1.93333	0.995533	1.12727	1.26652	1.22467	1.52397	0.557359	0.856951	0.657821	0.620629	2.39741	0.899866	1.2954	1.24011	1.48375	1.47334	1.40678	1.08622	0.406349	0.252863	0.438974	0.299137	0.26765	0.17181	0	0	0	0	0	0	0	0	0	0	0	0	0	0	0	0	0	0	0	0	0	0	0
FBtr0071142	0.398967	0.57831	1.04449	1.3535	0.728119	0.26014	0.0215964	0.0307898	0.681331	0.829009	0.782614	0.509798	0.504298	1.13802	0.433045	1.51674	0.69221	0.237829	0.104494	0.332534	0.58097	0.751171	0.581614	0.778625	0.800731	1.03893	0	1	0	1	1	1	1	1	1	1	1	1	0	0	0	0	1	1	1	1	0	1	0
FBtr0071143	0.636225	0.362404	0.530817	0.193409	1.25512	1.72322	1.44891	2.02773	0.894079	1.45334	1.02955	0.965512	1.04696	1.31506	1.25621	1.11125	1.40642	1.3775	1.51923	1.25918	0.306741	0.476893	0.365828	0.662252	0.467818	0.866777	0	0	0	0	0	0	0	0	0	0	0	0	0	0	0	0	0	0	0	0	0	0	0
FBtr0071145	0.36952	0.444221	0.12424	1.70778	0.801324	0.332685	0.862328	0.633814	1.02612	4.16553	1.77457	1	1.90395	3.60961	0.21894	1.51509	2.31367	0.962317	0.762055	1	0.736098	0.856569	0.693613	1.0516	0.65473	0.809534	0	0	0	0	0	0	0	0	0	0	0	0	0	0	0	0	0	0	0	0	0	0	0
FBtr0071150	0.127868	1	0.367036	1	0.332126	1	0.156264	1	0.0504093	0.194437	0.090217	0.0866902	0.691667	0.331955	0.259923	0.386941	0.508756	4.64358	1	3.94245	0.84038	1.17545	0.699885	0.623831	0.493075	0	0	0	0	0	0	0	0	0	0	0	0	0	0	0	0	0	0	0	0	0	0	1	0
FBtr0071151	0.504185	0.812807	0.618017	1.068	1.57317	0.534291	0.984287	0.562586	0.709968	0.84285	0.745544	0.866928	0.488958	0.727829	0.936404	0.919932	0.943635	0.791114	0.855186	0.946326	0.376094	0.204726	0.450932	0.258015	0.523169	0.335022	0	1	0	1	1	1	1	1	0	0	0	0	1	1	1	1	1	1	1	1	1	0	0
FBtr0071152	1.09982	1.09365	0.75426	1.01328	0.628262	1.29677	0.591874	0.824301	0.590979	0.825205	0.470426	0.762599	0.321479	0.789815	0.589555	0.746239	0.516517	0.86136	0.65976	0.763343	0.327847	0.201297	0.32019	0.211	0.301274	0.185143	0	0	0	0	0	0	0	0	0	0	0	0	0	0	0	0	0	0	0	0	0	0	0
FBtr0071153	0.0757886	0.0364063	0.0607409	0.0685546	0.0665565	0.128668	0.200518	0.0713605	0.0437358	0.0419536	0.0512749	0.0569392	0.0813696	0.0421078	0.217505	0.197808	0.0159481	0.0446891	0.0285874	0.0483831	0.818151	0.695177	0.70529	0.492188	0.661041	0.503319	1	2	1	2	2	2	2	2	2	2	2	2	2	2	2	2	2	2	2	2	2	2	2
FBtr0071155	0.067421	0.0240699	0.188203	0.0350686	0.463823	0.471538	0.582926	0.335281	0.268173	0.358089	0.17124	0.336352	0.271689	0.220815	0.192834	0.218715	0.340452	0.284941	0.499224	0.232976	0.541083	0.555465	0.672394	0.71343	0.73296	1.02977	0	0	0	0	0	0	0	0	0	0	0	0	0	0	0	0	0	0	0	0	0	0	0
FBtr0071157	0.12003	0.12157	0.367122	0.526482	0.597753	0.670659	0.533808	0.640243	0.321541	0.341896	0.259134	0.241414	0.124622	0.28332	0.158069	0.262378	0.418917	0.50861	0.292168	0.359557	0.515355	0.460583	0.481505	0.527361	0.526885	0.516945	0	2	0	2	2	0	0	2	1	1	0	2	0	0	0	0	2	0	0	2	1	1	1
FBtr0071158	0.0373591	0.0346756	0.349744	0.2128	0.427369	0.328175	0.583087	0.216387	0.257253	0.301453	0.131364	0.158483	0.24473	0.0876522	0.144469	0.195817	0.215068	0.190511	0.375288	0.173051	0.581413	0.459895	0.668542	0.506093	0.656959	0.61285	0	0	0	0	0	1	0	1	0	1	0	1	0	1	0	1	0	1	0	1	0	1	0
FBtr0071160	0.230251	0.170685	0.371672	1	1	0.048895	0.0749041	1	0.0852726	0.0216573	0.102624	0.0199389	3.65149	1.19083	0.186292	0.204765	1.41848	0.0477486	0.524126	0.0386394	1.4477	1.28895	1.1467	1.28919	0.967831	0.930559	0	0	0	0	0	0	0	0	0	0	0	0	0	0	0	0	0	0	0	0	0	0	0
FBtr0071166	0.56599	0.325945	2.12732	0.681309	2.00267	1.72011	1.85564	1.64726	1.31642	0.825262	1.67221	0.694998	1.68465	0.802	0.761872	0.589103	1.84401	1.67826	1.49522	1.33544	0.336597	0.50018	0.362353	0.57849	0.44153	0.63751	0	0	0	0	0	0	0	0	0	0	0	0	0	0	0	0	0	0	0	0	0	0	0
FBtr0071168	0.528059	0.347253	0.766826	0.316092	1.19438	1.37692	1.78055	1.6393	0.823646	1.3725	0.831247	1.20248	1.9056	1.819	1.15919	1.32367	1.06207	0.972545	1.10422	1.05101	0.390763	0.433041	0.448979	0.544954	0.514801	0.74762	0	0	0	0	0	0	0	0	0	0	0	0	0	0	0	0	0	0	0	0	0	0	0
FBtr0071170	0.190328	3.03514	0.491919	0.84821	0.505389	0.722231	0.827217	0.411387	0.47037	0.558453	0.83076	1.13067	1.12334	0.876043	0.287273	0.530402	0.27775	0.21378	0.259421	0.205512	0.582964	0.96258	0.440772	0.869055	0.51643	0.957848	1	0	0	1	5	2	2	5	4	6	4	6	5	6	5	6	2	5	2	5	6	6	6
FBtr0071171	0.684974	0.467856	0.550312	0.299024	0.356712	0.215312	0.318563	0.195798	0.250015	0.430519	0.353488	0.229101	0.38171	0.490323	0.731093	0.479918	0.546077	0.636722	0.472365	0.456536	0.345522	0.37591	0.391864	0.380866	0.358978	0.420862	0	1	0	1	0	1	0	1	0	0	0	0	0	1	0	1	0	1	0	1	0	1	0
FBtr0071173	0.336366	0.334241	0.61535	1	0.398503	0.291783	0.409499	0.685727	0.0217584	0.0183026	0.072484	0.0100591	0.33342	1.47979	0.18481	0.359496	0.1837	2.46468	0.350366	1.17484	0.608221	0.984033	0.725335	0.996213	0.275722	0.574765	0	0	0	0	0	0	0	0	0	0	0	0	0	0	0	0	0	0	0	0	0	0	0
FBtr0071174	4.02489	1.30824	1.20188	1.48566	1.07793	0.637497	1.01778	0.462307	2.47426	1.30024	3.13587	1.74038	1.2237	6.68136	1.09756	2.28004	0.705462	0.528227	0.726562	0.511248	0.682833	1.09515	0.58399	0.431628	0.800194	0.513162	4	4	4	4	4	3	3	4	3	3	3	3	3	4	3	4	4	3	3	4	4	4	4
FBtr0071175	0.563039	0.44456	0.836533	0.520035	0.836175	0.369971	0.917358	0.463441	0.601731	0.75041	0.675199	0.480843	0.6785	0.673786	0.58334	0.379545	0.852843	0.703085	0.723859	0.635058	0.174175	0.254496	0.195934	0.257715	0.196553	0.137851	1	2	1	2	1	2	1	2	1	2	1	2	1	0	0	1	1	2	1	2	1	2	1
FBtr0071176	0.158078	1	0.71449	1	0.149166	1	0.147025	1	0.207422	1	0.0404743	1	0.0412751	1	0.0039226	1	0.122835	1	0.196748	1	1.12608	0	1.01917	0	0.963668	0	6	4	4	7	9	3	3	9	6	3	3	7	3	4	2	5	4	3	3	5	6	5	5
FBtr0071178	1.3413	3.8184	1.26939	2.54312	1.03517	3.09341	1.61771	1.89109	1.38022	1.1489	1.28692	0.167908	1.82579	0.906712	1.9537	0.719107	2.49723	1.85441	1.6973	1.54452	0.267705	0.636853	0.142536	0.629199	0.182337	0.288572	0	0	0	0	0	0	0	0	0	0	0	0	0	0	0	0	0	0	0	0	0	0	0
FBtr0071179	0.460055	0.584695	1.88083	1.87048	2.22695	1.39251	0.606442	0.468867	1.36921	0.622139	0.260068	0.429387	1.29004	0.615091	2.10066	0.219149	1.57932	0.412338	0.935183	0.560125	0.54472	0.709669	0.716874	0.664683	0.688983	0.619627	0	0	0	0	0	0	0	0	0	0	0	0	0	0	0	0	0	0	0	0	0	0	0
FBtr0071180	0.661721	0.320739	0.423358	0.417107	0.697721	0.794713	1.16571	0.975085	0.992942	1.1395	0.556198	0.773731	2.42846	2.11566	1.16616	1.3046	0.715743	0.647948	0.704458	0.642861	0.604435	0.568798	0.370953	0.428743	0.421332	0.493494	0	0	0	0	0	0	0	0	0	0	0	0	0	0	0	0	0	0	0	0	0	0	0
FBtr0071183	0.958187	0.284995	1.81515	0.577256	1.54428	1.48258	1.61939	2.09126	0.862394	0.919491	0.542645	0.692471	1.32119	1.00397	1.2624	1.02347	1.35197	1.07898	1.39206	1.08834	0.301254	0.485259	0.412514	0.660197	0.248494	0.748304	0	0	0	0	2	2	2	2	0	0	0	0	2	2	2	2	2	2	2	2	2	2	2
FBtr0071186	0.233727	1	0.638427	1	1.0327	0.0942563	0.423013	0.132907	0.0588009	0.451057	0.0220564	0.970829	0.0531846	0.140822	0.157422	0.518178	0.278653	0.264296	0.0386003	0.176626	1.10983	0.802333	0.961246	0.717943	0.589329	0.919586	0	0	0	0	0	0	0	0	0	0	0	0	0	0	0	0	0	0	0	0	0	0	0
FBtr0071187	0.137291	0.0633798	0.489825	0.0207329	0.867406	0.0506976	0.131016	1	0.00354326	0.0208814	0.0217461	0.0220553	0.285652	0.0593416	0.208899	0.266623	1	0.644742	0.0245211	0.572265	1.12759	1.27647	1.23212	2.00797	0.861536	1.68439	0	0	0	0	0	0	0	0	0	0	0	0	0	0	0	0	0	0	0	0	0	0	0
FBtr0071188	0.995936	0.392156	1.0576	0.414799	0.533043	0.349664	0.609304	0.249121	0.468829	0.465405	0.618182	0.565452	0.317265	0.671488	0.546242	0.630652	0.508565	0.551697	0.649776	0.456183	0.363481	0.276087	0.349134	0.262936	0.333014	0.208741	1	1	1	1	1	1	1	1	1	1	1	1	1	1	1	1	1	1	1	1	1	1	1
FBtr0071189	0.172785	0.292521	0.835805	0.995923	1.14248	1.08527	1.16774	1.30498	0.634845	0.687816	0.54671	0.513594	0.540802	0.542311	1.01473	0.557075	1.07625	1.24492	1.13024	0.888799	0.409524	0.422377	0.507212	0.468446	0.558278	0.476042	0	0	0	0	0	0	0	0	0	0	0	0	0	0	0	0	0	0	0	0	0	0	0
FBtr0071190	0.563532	0.264452	0.616518	0.680025	1.47407	1.62208	1.35106	1.67123	0.830129	0.994799	0.954456	0.934211	0.650811	0.840532	0.852648	0.874889	1.08081	1.0389	1.18445	1.1971	0.327357	0.412174	0.390267	0.529462	0.477412	0.660005	0	0	0	0	0	0	0	0	0	0	0	0	0	0	0	0	0	0	0	0	0	0	0
FBtr0071191	1.13853	2.30855	1.4526	1.39903	1.11541	0.416641	1.1054	0.780373	1.01618	0.839886	0.565153	0.592459	1.03545	0.611051	0.730235	0.50273	1.02378	0.778027	0.821853	0.721047	0.245776	0.630655	0.269411	0.660462	0.138813	0.675081	0	0	0	0	0	0	0	0	0	0	0	0	0	0	0	0	0	0	0	0	0	0	0
FBtr0071192	0.0790061	0.126672	0.417336	0.603207	0.99641	1.16736	1.66804	1.72082	1.10168	1.7313	1.20613	1.08997	1.23383	2.97266	1.35139	1.98931	0.940702	1.30481	1.00042	1.22266	0.455875	0.560202	0.628323	0.586124	0.882215	0.763632	0	0	0	0	1	1	1	1	1	1	1	1	1	1	1	1	1	1	1	1	1	1	1
FBtr0071193	0.194701	1.23071	0.243488	0.372196	0.630421	0.789917	1.04986	0.499857	0.171662	0.61025	0.56772	0.224062	3.16415	0.646949	0.242112	0.149366	0.336583	0.309616	0.33007	0.354423	1.31165	0.616715	0.719595	0.573503	0.751202	0.526619	0	1	0	2	1	1	1	2	1	1	1	2	1	2	1	3	0	1	0	2	1	2	1
FBtr0071194	0.587375	0.684102	0.844608	0.83733	0.772174	0.60338	0.607363	0.736835	0.768107	0.802158	0.653533	0.537322	0.690512	0.653887	0.595073	0.574074	0.798245	0.76138	0.837988	0.567605	0.14098	0.156078	0.1473	0.16496	0.178745	0.137085	0	0	0	0	0	0	0	0	0	0	0	0	0	0	0	0	0	0	0	0	0	0	0
FBtr0071198	1.44908	1.33512	1.70723	1.00033	1.17264	0.484162	0.879635	0.263433	1.10904	0.569695	0.690227	0.469418	0.874734	0.725924	0.448724	0.493035	1.46381	0.92652	1.43372	0.806547	0.354466	0.448634	0.316832	0.582181	0.273669	0.631496	0	1	0	1	0	1	0	1	0	1	0	1	0	1	0	1	0	1	0	1	0	1	0
FBtr0071201	0.155803	1	0.53355	1	0.213609	10.1909	0.228673	0.321139	0.376879	0.0546608	0.301979	2.12608	2.86551	3.46743	5.9213	13.2936	0.0557376	0.0642837	0.0248321	0.0991962	1.78007	1.48826	0.453875	1.57631	0.600972	1.50877	0	0	0	0	0	0	0	0	0	0	0	0	0	0	0	0	0	0	0	0	0	0	0
FBtr0071202	0.10604	1	0.0409046	0.0621649	0.0744733	0.346521	0.243142	0.269072	0.279918	891.973	0.203467	0.404278	1.43333	1.44501	6.96317	7.20185	0.0459081	0.343868	0.180417	8.66002	2.24669	3.08642	0.617365	2.44265	0.764137	0.966112	0	0	0	0	0	0	0	0	0	0	0	0	0	0	0	0	0	0	0	0	0	0	0
FBtr0071203	1	0.0378504	0.0465134	1	0.0305467	0.0192738	0.0256888	0.0547249	9.98358	0.0641618	0.136799	0.587299	1.84124	1.90702	8.36777	7.56425	0.0423514	0.0888172	0.622058	1.59117	1.69108	1.78951	2.13444	1.39105	1.75183	1.73252	0	0	0	0	0	0	0	0	0	0	0	0	0	0	0	0	0	0	0	0	0	0	0
FBtr0071204	0.434076	0.136708	0.0496035	0.269872	0.111417	0.344662	0.0804567	0.0550532	0.270404	0.117603	1	3.97231	1.92163	2.04178	25.9473	145.188	0.0274722	0.190313	0.590038	9.09497	2.65144	2.81471	1.11321	1.89931	1.05741	0.645654	0	0	0	0	0	0	0	0	0	0	0	0	0	0	0	0	0	0	0	0	0	0	0
FBtr0071212	0.971786	0.496329	0.901185	0.576139	0.369481	0.165161	0.675397	0.314628	0.924733	0.774669	0.89924	0.644419	0.58794	0.676359	0.851848	0.733071	0.576124	0.592976	0.599369	0.604171	0.272874	0.338109	0.291557	0.450128	0.37184	0.475556	2	2	1	3	2	2	1	3	1	2	1	2	1	2	1	3	0	1	0	2	2	2	1
FBtr0071214	0.455349	0.153822	0.559616	0.790381	1.14557	1.23024	1.24157	1.01196	1.79426	1.81494	0.734179	1.17519	3.19727	1.80909	2.00901	1.14614	0.988197	0.993041	1.27315	0.873819	0.611322	0.439204	0.510054	0.532552	0.470668	0.583258	0	0	0	0	0	0	0	0	0	0	0	0	0	0	0	0	0	0	0	0	0	0	0
FBtr0071218	1.57384	0.916899	0.60743	0.379912	0.422521	0.240498	0.342715	0.220419	0.232478	0.19657	0.276436	0.287657	0.205833	0.198706	0.190014	0.262608	0.452872	0.361399	0.481129	0.273233	0.852439	0.641306	0.879378	0.733034	0.772504	0.742135	0	0	0	0	0	0	0	0	0	0	0	0	0	0	0	0	0	0	0	0	0	0	0
FBtr0071219	1.5829	0.975704	0.522159	0.727446	0.287611	0.278032	0.423149	0.322993	0.387934	0.356424	0.269749	0.326912	0.374807	0.633103	0.411472	0.38334	0.274706	0.283632	0.324021	0.326777	0.809747	0.512065	0.864506	0.574529	0.843518	0.580535	3	3	2	5	3	3	2	4	3	3	2	4	3	3	2	4	3	2	1	4	3	3	2
FBtr0071221	0.0578358	0.156513	0.319631	0.335449	0.494634	0.319355	0.595876	0.336802	0.238055	0.373517	0.243662	0.308978	0.346387	0.736622	0.428961	0.30462	0.220374	0.278091	0.161147	0.239568	0.519859	0.449242	0.596303	0.249197	0.641932	0.304397	0	0	0	0	0	0	0	0	0	0	0	0	0	0	0	0	0	1	0	1	0	1	0
FBtr0071222	0.115319	0.0713426	0.852112	0.589724	1.45866	0.959875	0.913138	1.16873	0.576901	0.624753	0.383	0.516594	0.258176	0.351175	0.372718	0.504372	0.71567	0.504821	0.665154	0.406081	0.615497	0.538976	0.654604	0.579943	0.660932	0.689936	0	0	0	0	3	2	2	3	2	3	2	3	3	3	3	3	3	3	3	3	3	3	3
FBtr0071223	0.291117	0.392039	1.84017	1.25546	1.19893	1.56385	0.598314	0.918806	0.47867	0.460388	0.606416	0.421175	0.306215	0.306193	0.590855	0.595793	1.09181	1.24328	1.13249	0.65758	0.602618	0.560913	0.69243	0.592057	0.697555	0.485907	3	3	2	4	3	3	2	4	3	3	1	5	3	3	2	4	2	4	2	4	2	4	1
FBtr0071224	0.278532	1	1.58545	1	0.58559	0.134741	0.154604	1	0.184421	0.242007	0.265582	0.300723	0.348199	10.9626	0.275124	0.322476	0.520193	0.408515	0.495849	0.6061	0.890738	2.07015	1.07885	0.697265	0.99647	0.552045	0	0	0	0	0	0	0	0	0	0	0	0	0	0	0	0	0	3	0	3	0	2	0
FBtr0071225	3.11349	8.49274	1.64929	3.26988	2.2457	2.55692	0.835011	2.71427	1.87347	1.58324	1.29901	1.05563	1.15388	0.489418	1.02339	3.45818	1.6552	2.24167	1.14613	1.22583	0.42716	0.831852	0.430694	0.816585	0.490418	0.666762	0	0	0	0	0	0	0	0	0	0	0	0	0	0	0	0	0	0	0	0	0	0	0
FBtr0071228	0.245093	0.163078	0.404156	0.544974	0.594265	0.265143	0.261214	0.140645	1.07963	0.787783	0.880093	0.915862	0.243313	0.538951	0.750656	0.983401	0.462325	0.454767	0.728935	0.749245	0.51464	0.546253	0.592168	0.706321	0.430678	0.667074	0	0	0	0	0	0	0	0	0	0	0	0	0	0	0	0	0	0	0	0	0	0	0
FBtr0071230	0.0461479	3.08221	0.272293	0.019593	0.242317	0.89613	0.393941	0.477811	0.411344	0.225045	0.666384	0.496344	0.780034	0.694972	0.38439	0.343255	0.533406	0.326587	0.537581	0.194017	0.501162	1.30628	0.612156	1.29868	0.603863	1.21269	0	0	0	0	0	0	0	0	0	0	0	0	0	0	0	0	0	0	0	0	0	0	0
FBtr0071232	0.21783	0.0887651	0.0438804	6.80744	2.70413	0.936481	1.43177	18.5141	0.181956	0.443882	0.773934	0.864988	1.49655	4.15517	1.3437	1.29676	5.68315	0.22007	2.23085	264.19	1.04331	2.77517	1.15031	1.57488	1.12349	1.28961	0	0	0	0	0	0	0	0	0	0	0	0	0	0	0	0	0	0	0	0	0	0	0
FBtr0071233	1.62279	1.79406	3.5967	1.97083	0.548539	1.48802	0.498535	1.35391	1.51428	0.692574	1.20508	1.30523	0.670569	0.858007	1.27412	0.892907	1.75743	1.88523	1.24107	1.97413	0.64053	0.340769	0.755817	0.310819	0.925119	0.170376	2	2	2	2	3	2	2	3	0	2	0	2	2	1	1	2	2	2	2	2	2	2	2
FBtr0071234	0.971823	0.816098	0.284667	0.662257	0.804012	0.397698	0.71817	0.475491	0.526104	0.725176	0.404449	0.580676	0.360394	0.643982	0.64498	0.600011	0.636862	0.541841	0.579153	0.564698	0.35446	0.199738	0.418693	0.256777	0.421683	0.320369	0	0	0	0	0	0	0	0	0	0	0	0	0	0	0	0	0	0	0	0	0	0	0
FBtr0071235	0.589743	1	0.416956	1.94607	0.484595	0.106734	0.648864	0.305549	0.126169	0.33876	0.54147	0.975297	0.6426	1.04658	0.438129	0.0630244	0.34448	0.252419	0.278323	0.293198	0.37123	0.942792	0.397098	0.874596	0.194345	0.98992	0	0	0	0	0	0	0	0	0	0	0	0	0	0	0	0	0	0	0	0	2	0	0
FBtr0071237	0.123964	0.318274	0.101252	0.135153	0.505965	0.193066	0.391377	0.250862	0.205776	0.733337	0.136782	0.218894	0.273977	0.505895	0.063057	0.62411	0.319149	0.115709	0.0994472	0.53228	0.660205	0.603736	0.680569	0.703735	0.711949	0.349658	0	0	0	0	0	0	0	0	1	0	0	1	0	0	0	0	0	0	0	0	0	0	0
FBtr0071239	0.0190996	0.0829207	0.212312	1	0.187753	6.14891	1	7.28958	0.167572	0.0197021	0.170159	0.0208455	0.527633	1	0.452117	0.35542	0.0801191	1.18328	1	0.305962	0.944736	1.53528	1.20576	1.38645	1.2363	0.99617	0	4	0	5	0	0	0	0	0	0	0	0	0	0	0	0	0	0	0	0	0	0	0
FBtr0071240	0.534848	2.8361	0.652934	0.614227	0.901187	2.5081	1.10182	1.24832	0.470353	0.289684	0.456052	0.147018	2.03741	0.618865	1.30482	0.306096	0.864413	0.672675	1.97923	0.567735	0.566921	0.961507	0.381429	0.904479	0.318168	0.58083	1	0	0	1	0	0	0	0	0	0	0	0	1	0	0	1	1	0	0	1	1	0	0
FBtr0071241	0.81713	0.318116	2.68627	0.345426	0.145982	0.226007	0.650389	1.95467	0.893922	1.51775	1.2243	0.917242	1.23872	0.761968	1.21454	0.847025	2.06927	1.44539	1.56643	1.39426	0.579565	0.603826	0.810806	0.818338	1.03398	1.16819	0	0	0	0	0	0	0	0	0	0	0	0	0	0	0	0	0	0	0	0	0	0	0
FBtr0071243	0.083298	1	1	1	1.96008	0.936133	0.205254	13.4417	0.157681	0.274855	0.0536375	0.180933	13.0257	1	0.405076	0.441785	0.0801191	1	0.0669605	2.13888	2.36181	1.87165	1.32602	1.86188	1.06694	1.52195	0	0	0	0	0	0	0	0	0	0	0	0	0	0	0	0	0	0	0	0	0	0	0
FBtr0071244	0.283916	6.5555	0.427858	0.651013	1.83019	1.41274	1.71395	0.944052	1.0652	1.69245	1.73817	0.770899	1.78653	1.32132	1.17335	0.513812	0.488284	0.0793422	0.436346	1	0.588048	1.23082	0.589006	1.12969	0.771741	1.16868	1	1	0	2	0	2	0	2	1	2	1	2	2	2	1	3	1	0	0	1	0	2	0
FBtr0071245	0.0312852	0.136059	0.738231	0.0707636	0.944047	0.93098	0.931389	1.33162	0.284532	0.389828	0.368642	0.332539	0.598213	0.484949	0.16498	0.255733	1.05853	0.668166	0.698708	0.542783	0.608904	0.745192	0.684851	0.931634	0.650899	0.998055	0	0	0	0	0	0	0	0	0	0	0	0	0	0	0	0	0	0	0	0	0	0	0
FBtr0071246	0.0951172	0.158253	0.291013	0.387602	0.677479	0.582137	0.753617	0.43842	0.318818	0.583801	0.33404	0.525018	0.177089	0.419797	0.198761	0.357562	0.318652	0.415576	0.25724	0.368212	0.617306	0.294949	0.611617	0.361685	0.690329	0.44952	0	2	0	2	3	3	2	4	2	3	2	3	4	3	3	4	2	2	1	3	2	2	2
FBtr0071248	0.00924568	0.129802	0.0960801	0.15259	0.00834969	0.181705	0.0685295	0.0826903	0.0454138	0.175014	0.102296	0.0824608	0.0596748	0.0791721	0.177999	0.19032	0.00158108	0.143366	0.107832	0.104507	0.818747	0.326049	0.748486	0.327063	0.963882	0.30581	0	0	0	0	0	0	0	0	0	0	0	0	0	0	0	0	0	0	0	0	0	0	0
FBtr0071249	0.0704591	0.294483	0.325313	0.573285	0.890663	0.699544	0.819634	0.339345	1.13129	0.99054	0.930303	1.08887	1.07351	0.733196	0.482492	0.396679	0.918818	1.0953	1.46939	1.27839	0.508191	0.468083	0.585235	0.494022	0.749344	0.403647	0	0	0	0	0	0	0	0	0	0	0	0	0	0	0	0	0	0	0	0	0	0	0
FBtr0071250	0.826325	0.547409	1.44651	1.51691	1.79686	1.9116	1.21828	1.87308	1.35568	1.61072	1.27309	1.21883	0.955554	1.08729	1.43356	1.30606	1.44494	1.19115	1.41462	1.65554	0.207413	0.295087	0.239889	0.351223	0.308024	0.434432	0	0	0	0	0	0	0	0	0	0	0	0	0	0	0	0	0	0	0	0	0	0	0
FBtr0071251	2.80567	1.84522	2.57386	1.66942	1.83718	1.41047	1.26383	1.18453	1.12812	1.33742	1.21376	1.27704	1.31662	0.989299	2.00716	1.83262	2.36879	2.41101	2.79532	2.38191	0.350092	0.297847	0.406957	0.173683	0.332311	0.189907	0	0	0	0	0	0	0	0	0	0	0	0	0	0	0	0	0	0	0	0	0	0	0
FBtr0071253	0.199057	2.48505	0.672069	0.521299	0.708486	1.05999	1.07162	0.824962	1.01404	1.52024	0.612258	2.37029	2.28095	2.61483	1.02048	0.845871	0.514838	0.548447	0.57975	0.614002	0.650721	0.631138	0.441439	0.557352	0.540038	0.711382	0	1	0	1	1	1	1	1	1	1	1	1	1	1	1	1	1	1	1	1	1	1	1
FBtr0071255	1.28421	1.5349	0.919836	0.954029	0.914173	0.712463	0.60906	0.983179	0.924444	1.022	0.846275	0.862834	0.662366	0.619652	0.820772	0.945009	1.10201	1.23366	0.848286	0.999395	0.21829	0.259709	0.236459	0.275982	0.296375	0.332361	0	0	0	0	0	0	0	0	0	0	0	0	0	0	0	0	0	0	0	0	0	0	0
FBtr0071263	0.155608	0.135684	0.347548	0.288386	0.349091	1.24423	0.700079	0.79762	0.616731	0.751733	0.154248	0.721435	0.541992	0.478517	0.383757	0.532211	0.607306	0.762037	0.905409	0.84338	0.506388	0.476625	0.590607	0.603686	0.584858	0.819497	0	0	0	0	0	0	0	0	0	0	0	0	0	0	0	0	0	0	0	0	0	0	0
FBtr0071264	0.900367	0.0278433	1	1	1	1	1.09472	2.02731	0.171942	1	0.0895741	1	0.33299	0.0326974	0.216277	1	1	1	1	8.45961	0.61414	1.48432	0.638798	0.626687	0.0794557	0.805331	0	0	0	0	0	0	0	0	0	0	0	0	0	0	0	0	0	0	0	0	0	0	0
FBtr0071265	0.0886325	0.739879	1	0.244699	0.0395997	1	1	0.0482765	0.070414	0.13396	0.183678	0.0500682	0.480689	0.621144	0.185632	0.186904	1	0.0531184	1	10.2975	0.877095	2.36687	1.18249	1.09001	1.01625	0.86257	0	0	0	0	0	0	0	0	0	0	0	0	0	0	0	0	0	0	0	0	0	0	0
FBtr0071266	3.20612	1.78667	4.54953	1.74335	2.01845	0.722916	1.04271	0.654652	1.41615	0.767368	1.45924	0.751995	0.74448	0.476331	1.35829	0.810312	2.11108	1.18951	2.3326	1.23441	0.5612	0.451115	0.588816	0.50321	0.560332	0.507162	0	0	0	0	0	0	0	0	0	0	0	0	0	0	0	0	0	0	0	0	0	0	0
FBtr0071268	0.178537	0.185615	1.42794	0.244584	1.03544	0.862015	1.58222	1.02599	0.569323	0.552878	1.16723	0.323714	1.60898	0.503361	1.13266	0.623243	1.47869	0.534935	1.4397	0.407549	0.401569	0.500092	0.534796	0.65022	0.595295	0.736436	0	0	0	0	0	0	0	0	0	0	0	0	0	0	0	0	0	0	0	0	0	0	0
FBtr0071270	0.454658	0.346363	0.496268	0.490035	0.620187	0.616392	0.723927	0.341849	0.242336	0.688756	0.581654	0.818497	0.779538	1.76768	0.399775	0.178394	1.69783	2.16508	1.55571	2.27778	0.643586	0.817051	0.318837	0.348722	0.213212	0.292649	0	0	0	0	0	0	0	0	0	0	0	0	0	0	0	0	0	0	0	0	0	0	0
FBtr0071279	0.182758	2.68383	0.74731	1.16633	1.07555	1.06265	1.78088	0.895806	0.483054	1.00448	1.07411	0.740428	2.53937	3.10317	2.47712	2.53554	0.605071	0.379471	0.415062	0.396963	0.745559	0.711899	0.624788	0.566473	0.704913	0.570631	0	0	0	0	1	1	1	1	0	1	0	1	1	0	0	1	0	1	0	1	1	1	1
FBtr0071280	0.814925	1.083	0.364388	0.949004	1.67673	1.36845	1.11025	1.59214	0.855075	0.975238	0.866445	0.931573	0.607898	0.779296	1.14159	0.895555	1.0236	0.984874	0.946943	0.97544	0.369799	0.231016	0.455188	0.235397	0.554856	0.23108	0	0	0	0	0	0	0	0	0	0	0	0	0	0	0	0	0	0	0	0	0	0	0
FBtr0071281	0.920378	1.18519	1.08547	1.20324	0.926342	1.17738	0.63451	0.974486	0.483071	0.717866	0.991488	0.637182	0.860584	0.703895	1.09806	0.967841	1.37916	1.21254	1.80704	1.25439	0.364492	0.238964	0.2749	0.256315	0.210526	0.0948	0	0	0	0	0	0	0	0	0	0	0	0	0	0	0	0	0	0	0	0	0	0	0
FBtr0071284	2.46964	2.80166	2.01883	1.88703	1.28281	1.07985	0.620894	0.614557	0.793225	0.935254	1.12441	0.698272	0.721402	0.923317	0.901595	1.01246	1.65084	1.27773	1.59246	1.18019	0.461854	0.524799	0.519726	0.635532	0.509776	0.601931	4	2	2	4	3	2	2	3	4	2	2	4	2	1	1	2	1	1	0	2	1	1	0
FBtr0071285	0.549588	0.516726	0.404065	0.72141	0.82584	0.409812	0.811115	0.618805	0.46064	0.553366	0.434669	0.358091	0.509175	0.590238	0.417196	0.486677	0.92175	0.812447	0.951105	0.730084	0.353229	0.250476	0.327566	0.252216	0.318215	0.236227	1	0	0	1	1	0	0	1	0	0	0	1	1	0	0	1	1	0	0	1	1	0	0
FBtr0071286	1.41086	2.26808	2.2622	1.31648	1.77651	1.46253	1.1217	0.941548	0.826975	0.600925	0.937084	0.584272	1.49928	0.724725	1.16544	0.927589	1.91241	1.22813	1.71764	1.0438	0.31356	0.452728	0.39488	0.532655	0.299626	0.373258	0	0	0	0	0	0	0	0	0	0	0	0	0	0	0	0	0	0	0	0	0	0	0
FBtr0071287	0.455552	3.96853	0.468291	2.21673	1.34125	2.26233	1.51031	1.45893	1.17671	2.2329	0.945578	0.796242	2.12431	2.5419	1.46871	1.18104	1.11042	1.55279	1.17029	3.24037	0.42014	0.447101	0.452337	0.492671	0.594132	0.428265	0	2	0	2	0	2	0	2	0	2	0	2	0	0	0	0	0	2	0	2	0	2	0
FBtr0071288	4.03425	2.22147	2.64204	1.43279	0.540167	1.51408	1.85889	0.903907	1.65255	0.657495	1.26639	0.63728	5.6641	0.760338	1.04078	0.944999	1.32983	1.2626	1.83287	0.994498	0.712496	0.43185	0.606931	0.500762	0.644383	0.356622	0	0	0	0	0	1	0	1	0	0	0	0	0	1	0	1	0	0	0	0	0	0	0
FBtr0071289	0.250031	0.259597	0.595718	0.591336	1.20613	1.49652	1.49507	1.07599	0.833235	0.983655	0.951121	1.00101	0.714511	1.33987	0.821447	1.11554	0.789898	0.739201	0.923431	0.859856	0.389559	0.37865	0.495483	0.473146	0.638659	0.634397	0	0	0	0	0	0	0	0	0	0	0	0	0	0	0	0	0	0	0	0	0	0	0
FBtr0071293	1.53561	1.6039	1.21371	0.96526	1.26774	1.49621	0.915918	0.889978	0.383954	0.861122	0.343132	0.746908	0.773097	0.634921	0.532654	1.21943	1.12657	1.58511	1.15053	1.49104	0.437777	0.324151	0.519977	0.33079	0.206038	0.293296	0	0	0	0	0	0	0	0	0	0	0	0	0	0	0	0	0	0	0	0	0	0	0
FBtr0071296	1.31036	0.711521	0.594173	0.68456	0.790277	0.760763	0.856037	0.738411	0.695152	0.92372	0.650755	0.747771	0.848038	1.17444	0.845042	0.825494	0.55178	0.566651	0.539033	0.488133	0.295366	0.248474	0.318472	0.110636	0.341244	0.0456151	1	1	0	2	1	2	1	2	2	1	1	2	2	2	2	2	1	0	0	1	0	0	0
FBtr0071299	1.23254	0.465519	0.718359	0.911014	0.904909	0.965865	0.682535	1.13017	0.746963	0.867886	0.672112	0.614743	1.0016	1.22137	1.16132	0.705528	0.583716	0.385352	0.61347	0.388988	0.277776	0.393081	0.261605	0.294434	0.284452	0.327261	2	2	1	3	2	3	1	4	2	3	1	4	0	2	0	3	2	3	1	4	1	2	1
FBtr0071300	2.11332	1.07673	0.887146	0.725223	1.02114	0.342507	0.531312	0.198659	1.25182	0.911466	0.963505	1.03059	0.71857	1.2648	0.265336	0.550123	0.534193	0.475914	0.536524	0.50762	0.591269	0.494365	0.47553	0.514268	0.599291	0.675353	1	1	1	1	1	1	1	1	1	1	1	1	1	1	1	1	1	1	1	1	1	1	1
FBtr0071304	0.547555	1.99121	1.67745	0.564965	0.0179958	12.5869	1.31855	3.72504	0.902932	1.99759	2.33903	4.17377	2.77456	1.39695	1.41992	1.48115	1.85931	0.189641	16.7367	19.4246	1.65864	1.31866	0.729821	1.03624	0.840803	1.1455	0	0	0	0	0	0	0	0	0	0	0	0	0	0	0	0	0	0	0	0	0	0	0
FBtr0071305	0.447642	0.720201	0.597933	0.59244	0.947786	1.05891	0.963666	1.1605	0.657358	0.651848	0.817886	0.642486	0.659959	0.687842	0.593225	0.647941	0.997003	0.949102	0.928883	0.804964	0.25422	0.249276	0.278577	0.300984	0.348267	0.305897	0	0	0	0	0	0	0	0	0	0	0	0	0	0	0	0	0	0	0	0	0	0	0
FBtr0071306	2.66378	1.26307	1.86077	0.985941	1.09369	1.18992	0.904762	1.21292	0.768297	0.673606	0.729359	0.722079	0.850678	0.887153	1.291	0.964733	1.34836	1.63665	1.22139	0.992629	0.467218	0.269755	0.576873	0.256504	0.492554	0.104821	0	0	0	0	0	0	0	0	0	0	0	0	0	0	0	0	0	0	0	0	0	0	0
FBtr0071307	1	1	0.192859	1	0.23832	6.61417	0.323487	0.0575084	0.0471623	1	0.16496	1	0.44256	0.224434	0.128374	0.146462	0.23035	0.599097	0.351168	0.395106	0.85746	1.61117	1.04202	1.34866	0.861974	1.38256	0	0	0	0	0	0	0	0	0	0	0	0	0	0	0	0	0	0	0	0	0	0	0
FBtr0071308	0.0566446	1	0.191909	1	0.0924205	0.0807505	0.0246599	0.0607623	0.192145	0.00852896	0.0190889	0.0341966	0.202285	0.0170004	0.291998	0.273449	0.0106981	0.16454	0.0126021	0.052483	0.929525	1.46097	0.81909	1.35484	0.793055	1.00221	0	0	0	0	0	0	0	0	0	0	0	0	0	0	0	0	0	0	0	0	0	0	0
FBtr0071309	0.543781	111.858	0.734171	0.898881	0.353453	6.0111	2.0049	7.33784	2.47723	1.9852	0.685598	0.7152	1.94628	0.872802	2.00053	2.09615	1.98666	2.021	1.7085	2.00276	0.535754	2.54813	0.777499	2.0667	0.821603	1.70099	0	0	0	0	0	0	0	0	0	0	0	0	0	0	0	0	0	0	0	0	0	0	0
FBtr0071310	1.15198	1.57396	2.47647	16.1803	1.18019	1.24398	1.63972	1.48484	1.92283	1	2.1544	2.19111	0.917962	1.2139	1.30266	0.351655	0.186279	0.651263	17.1277	0.440673	1.66499	1.82005	0.303305	1.52242	0.383417	1.44008	0	0	0	0	0	0	0	0	0	0	0	0	0	0	0	0	0	0	0	0	0	0	0
FBtr0071311	1	1	0.359953	1	1	1	0.350169	0.0667231	1	1	1	1	0.135785	0.132621	0.116286	0.953243	0.11549	0.905082	0.339582	0.0889138	0.74809	0.599209	0.424268	0.451189	0.549609	0.608648	0	0	0	0	0	0	0	0	0	0	0	0	0	0	0	0	0	0	0	0	0	0	0
FBtr0071313	0.140483	0.212332	0.547534	0.862768	0.969336	0.932952	0.699699	0.893409	0.58777	0.711905	0.501041	0.403492	0.432037	0.447356	0.914953	0.733034	0.672278	0.598503	0.67103	0.520531	0.386426	0.374927	0.471249	0.442326	0.587703	0.473178	0	0	0	0	0	0	0	0	0	0	0	0	0	0	0	0	0	0	0	0	0	0	0
FBtr0071314	0.0793361	0.0486972	0.195371	0.283229	0.518404	0.478426	0.509745	0.231962	0.342376	0.178629	0.183569	0.18915	0.576746	0.367775	0.207856	0.222258	0.18506	0.186266	0.193443	0.195063	0.585652	0.49138	0.598781	0.606489	0.683504	0.678159	0	0	0	0	1	1	1	1	1	1	1	1	1	1	1	1	1	0	0	1	1	0	0
FBtr0071317	0.933385	0.507843	0.954832	0.880721	1.10041	1.19478	1.04883	1.04269	0.747954	0.854586	0.627098	0.809617	0.69147	0.999223	0.585783	0.616929	0.886222	1.11218	1.16382	1.02084	0.231766	0.239291	0.200769	0.263379	0.077998	0.32553	0	0	0	0	0	0	0	0	0	0	0	0	0	0	0	0	0	0	0	0	0	0	0
FBtr0071319	0.442703	0.510345	0.794313	0.991909	0.697444	0.428876	0.363947	0.402586	0.560824	0.78611	0.88444	0.75246	0.83758	1.57596	0.626757	0.682242	0.751021	1.19049	0.689513	0.899188	0.25371	0.442784	0.325879	0.363655	0.355437	0.473335	1	1	1	1	1	1	1	1	1	0	0	1	0	0	0	0	1	1	1	1	1	1	1
FBtr0071320	0.747934	1.47612	0.25192	0.629445	0.980101	1.1086	0.96975	0.882903	0.910407	1.79139	0.803485	1.2968	0.92288	4.84689	0.384604	0.504806	0.230105	0.358986	0.366432	0.32888	0.473892	1.00723	0.351613	0.348275	0.462319	0.350725	0	0	0	0	0	0	0	0	1	0	0	1	0	0	0	0	0	1	0	1	0	1	0
FBtr0071324	3.37774	2.93208	2.32922	2.08328	2.7134	1.64227	1.33699	1.16079	1.57542	1.32923	1.4418	1.59143	2.35643	2.11049	1.35999	1.68407	1.78269	2.03611	1.6683	1.49272	0.340124	0.281095	0.384277	0.358605	0.3497	0.385096	0	0	0	0	0	0	0	0	0	0	0	0	0	0	0	0	0	0	0	0	0	0	0
FBtr0071326	0.421298	0.675701	0.543164	0.55301	1.01249	0.748134	1.04539	0.857752	1.02336	1.04551	0.642597	0.814834	0.726036	0.913217	1.06433	0.749585	0.841241	0.737582	0.895777	0.786344	0.278443	0.169707	0.3562	0.214712	0.423277	0.180529	0	0	0	0	0	0	0	0	0	0	0	0	0	0	0	0	0	0	0	0	0	0	0
FBtr0071327	0.720743	1.19315	1.10947	1.06534	1.45782	0.885563	1.0527	0.729683	0.51999	0.4566	0.685066	0.504206	0.40892	0.409973	0.586656	0.405856	0.545588	0.643126	0.585831	0.61194	0.431953	0.401055	0.374018	0.369186	0.278146	0.209727	0	1	0	1	0	1	0	1	0	1	0	1	0	1	0	1	0	1	0	1	0	1	0
FBtr0071328	0.562538	1	0.211861	1	0.264896	0.155172	0.339129	1	0.475364	3.96043	0.239023	3.56039	0.165006	1	0.398634	1	0.185796	1	0.045306	1	0.539638	0.845179	0.404717	0.884671	0.44799	0.535519	0	0	0	0	0	0	0	0	0	0	0	0	0	0	0	0	0	0	0	0	0	0	0
FBtr0071329	0.258764	0.663676	0.422749	0.142065	0.489871	0.667177	0.305873	0.246809	0.0522195	0.0525963	0.075219	0.0432269	0.298772	0.424805	0.171874	0.25043	0.520264	0.104197	0.174766	1.48521	0.589596	1.08578	0.665542	0.960041	0.286709	0.640267	0	0	0	0	0	0	0	0	0	2	0	2	1	0	0	1	0	0	0	0	0	0	0
FBtr0071331	0.713526	0.450535	1.737	1.34837	1.50532	1.64432	1.34112	1.26787	0.882068	1.11026	0.985048	0.895664	0.803615	0.992014	1.11524	1.20252	1.93275	2.42516	2.01648	1.67961	0.365929	0.409535	0.331898	0.367763	0.33101	0.43398	0	0	0	0	0	1	0	1	0	1	0	1	0	0	0	0	0	0	0	0	0	0	0
FBtr0071332	1.13641	0.953335	0.445177	0.951658	0.899271	1.09938	0.389614	0.883619	0.667279	0.795483	0.546174	0.423622	0.381571	0.835221	0.864391	0.782914	0.370554	0.350992	0.300354	0.304291	0.469047	0.3766	0.422718	0.27255	0.502561	0.0935407	2	2	2	2	2	2	2	2	2	2	2	2	2	1	1	2	2	0	0	2	1	2	1
FBtr0071333	0.408404	0.10466	0.199305	0.0201633	0.69582	0.0493463	0.207364	0.146776	0.822831	0.242563	0.34895	0.107274	0.432721	0.0499326	0.377095	0.0451662	1	0.506652	0.153792	0.581654	0.61162	1.08078	0.577228	0.700799	0.617071	0.704546	0	0	0	0	0	0	0	0	0	0	0	0	0	0	0	0	0	0	0	0	0	0	0
FBtr0071334	1.45358	1.53436	1.16529	0.964044	0.90695	0.668402	0.693926	0.732918	0.969626	1.25547	0.848594	1.1386	0.566997	1.10436	0.662389	0.890834	1.30731	1.21098	1.00261	1.21637	0.298853	0.244017	0.266272	0.312775	0.311195	0.40409	0	0	0	0	0	0	0	0	0	0	0	0	0	0	0	0	0	0	0	0	0	0	0
FBtr0071335	0.158598	2.2717	1.53848	0.270871	1.54988	1.44551	2.75103	1.97003	3.06386	4.37821	2.38274	2.56292	4.17852	3.02187	2.47467	1.16096	2.88295	2.47859	2.53318	2.1247	0.45824	0.51105	0.554696	0.631296	0.706652	0.591621	0	0	0	0	0	0	0	0	0	0	0	0	0	0	0	0	0	0	0	0	0	0	0
FBtr0071336	0.675625	5.69952	1.04206	0.635163	0.238868	1.87217	1.1161	1.13621	1.08951	0.428942	1.77936	9.0042	2.27535	1.37511	1.67852	1.14199	0.619058	0.508235	0.418299	0.494883	0.594239	1.27671	0.51781	1.10868	0.523319	0.9844	0	0	0	0	0	0	0	0	0	0	0	0	0	0	0	0	0	0	0	0	0	0	0
FBtr0071338	0.486446	5.67717	0.226007	1.22456	1.89001	1.64662	1.51272	1.89762	3.53462	6.0305	1.06498	1.50674	2.89208	2.56396	1.9123	1.68806	1.30714	1.36472	1.21888	1.43865	0.631715	0.721127	0.821465	0.742762	0.776491	0.789804	0	0	0	0	0	0	0	0	0	0	0	0	0	0	0	0	0	0	0	0	0	0	0
FBtr0071339	2.60401	2.60689	1.59564	1.08654	2.00843	2.03191	1.71282	1.62878	1.13299	1.32228	0.458839	0.692152	2.00096	1.87483	0.758099	0.723395	1.71019	1.66008	1.26518	1.20625	0.417391	0.40404	0.464066	0.43974	0.227586	0.349301	0	0	0	0	0	0	0	0	0	0	0	0	0	0	0	0	0	0	0	0	0	0	0
FBtr0071341	0.162833	7.20822	0.0877238	5.17878	0.0761826	11.3168	0.715313	4.51543	1.16249	0.775289	1.17825	1.67776	0.1769	4.51278	0.625598	0.717435	0.254673	1	0.0928981	48.3451	0.968015	1.68776	0.933209	0.751814	1.17316	0.434251	0	0	0	0	0	0	0	0	0	0	0	0	0	0	0	0	0	0	0	0	0	0	0
FBtr0071342	1.05378	1.03189	1.35512	1.30671	1.36789	1.65605	1.24103	1.98297	0.778125	0.824278	0.788185	0.764683	1.17861	1.02641	0.684905	1.00763	1.10124	1.7905	1.05042	1.45743	0.227779	0.328307	0.244409	0.383411	0.115932	0.276978	0	1	0	1	0	1	0	1	0	1	0	1	0	1	0	1	0	1	0	1	0	1	0
FBtr0071343	2.78001	1.77171	2.90525	1.19038	1.66092	1.2813	2.14232	1.68935	0.858423	0.868323	1.15636	0.672884	4.13844	1.13379	1.58303	1.45527	2.03939	1.59276	2.33072	1.26452	0.441512	0.271095	0.43869	0.349627	0.244508	0.195503	0	0	0	0	0	0	0	0	0	0	0	0	0	0	0	0	0	0	0	0	0	0	0
FBtr0071344	1.30154	1.04444	1.00678	0.89951	1.30947	1.01112	1.34418	0.995941	0.862275	1.04151	1.18981	0.801549	0.939928	1.29623	0.852302	0.986058	1.16076	1.18687	1.32804	1.23197	0.174929	0.143967	0.166233	0.0995969	0.126488	0.0629911	0	0	0	0	0	0	0	0	0	0	0	0	0	0	0	0	0	0	0	0	0	0	0
FBtr0071345	2.40106	2.54154	2.87016	1.75807	2.73375	1.54369	2.56482	1.5385	2.64632	1.88714	2.96058	1.67119	2.1436	1.91262	3.51479	1.78986	2.9788	2.14783	2.96286	1.73794	0.135157	0.162872	0.075727	0.206177	0.0770884	0.2575	0	0	0	0	0	0	0	0	0	0	0	0	0	0	0	0	0	0	0	0	0	0	0
FBtr0071348	0.26879	0.0959519	1.28786	0.345578	1.52403	1.07433	1.45359	1.35144	0.601032	0.771966	0.612747	0.317418	1.42918	0.618142	0.729004	0.565185	1.18707	1.02276	1.04821	0.727825	0.428546	0.558971	0.551642	0.74186	0.516031	0.826831	0	0	0	0	0	0	0	0	0	0	0	0	0	0	0	0	0	0	0	0	0	0	0
FBtr0071349	1.46433	1.06132	1.52829	1.1433	1.43002	0.902267	2.0386	0.97558	2.03303	3.55695	3.30097	2.11423	0.44611	1.18879	2.17742	2.18366	2.24131	2.20018	1.20498	1.53914	0.425885	0.494832	0.361303	0.643161	0.176509	0.102362	3	3	2	4	3	4	3	4	2	3	2	3	3	4	3	4	2	4	2	4	2	3	2
FBtr0071350	1.90893	1.67045	0.999225	1.24409	0.923571	0.973993	0.769121	0.615084	1.21522	1.33222	0.994654	1.59948	0.691918	1.07299	1.10875	1.41316	0.903576	1.00852	0.969802	0.967364	0.321887	0.272337	0.357221	0.319602	0.447567	0.395383	0	0	0	0	0	0	0	0	0	0	0	0	0	0	0	0	0	0	0	0	0	0	0
FBtr0071353	1.0931	1.08118	1.06641	1.47729	1.88743	1.61211	1.21827	1.63545	0.900636	1.30196	1.5137	0.9867	0.630527	1.14151	1.04813	1.20572	1.30788	1.58504	1.28368	1.4756	0.286642	0.175995	0.282105	0.202435	0.293599	0.176738	0	0	0	0	0	0	0	0	0	0	0	0	0	0	0	0	0	0	0	0	0	0	0
FBtr0071356	0.0711697	1	1	1	0.0314641	0.252534	0.0376372	0.0129405	0.00338184	0.115061	0.0479669	0.031592	0.19475	0.0205953	0.200295	0.197682	0.227272	1.18857	0.0387796	24.9823	1.60693	2.70112	1.97995	1.17118	1.67308	0.900789	0	0	0	0	0	0	0	0	0	0	0	0	0	0	0	0	0	0	0	0	0	0	0
FBtr0071358	2.29596	2.01708	1.62054	1.37785	1.34783	0.934962	1.22079	0.823495	0.809609	1.10326	1.82919	1.15447	0.802912	1.50418	0.878926	0.904914	1.02346	1.90379	0.820186	1.38893	0.403325	0.312312	0.339374	0.346382	0.295883	0.420395	0	0	0	0	0	0	0	0	0	0	0	0	0	0	0	0	0	0	0	0	0	0	0
FBtr0071360	0.267836	0.308748	0.668046	0.321277	0.740504	0.667484	0.52688	0.310117	0.215188	0.160875	0.232685	0.221738	0.283057	0.131018	0.223965	0.215207	0.437391	0.216681	0.417758	0.223587	0.47703	0.543127	0.528824	0.531009	0.378468	0.440751	0	0	0	0	0	0	0	0	0	0	0	0	0	0	0	0	0	0	0	0	0	0	0
FBtr0071361	0.328988	0.227209	0.973811	0.733113	1.46708	1.64628	2.19194	1.64699	2.59876	3.73235	1.6876	2.42779	1.9177	2.28617	2.61289	1.98747	1.3266	1.49298	1.20177	1.48555	0.444637	0.541652	0.531856	0.71788	0.634521	0.662426	0	0	0	0	1	1	1	1	0	1	0	1	1	1	1	1	1	1	1	1	1	1	1
FBtr0071363	2.012	1.39699	1.43102	0.846248	0.209888	0.222605	0.373506	0.337877	0.531819	0.739853	0.557803	0.417861	0.671802	0.95078	0.777138	0.792921	0.548315	0.696719	0.532221	0.638155	0.712043	0.478808	0.831136	0.655992	0.855843	0.766618	2	2	2	2	2	2	2	2	2	2	2	2	2	2	2	2	2	2	2	2	2	2	2
FBtr0071367	0.344821	0.354399	0.589673	0.486655	0.860999	0.510291	0.934878	0.642332	0.492561	0.794779	0.842583	0.739879	0.326062	0.553938	0.59806	0.631861	0.650825	0.476379	0.765295	0.549755	0.330898	0.228404	0.349094	0.284201	0.395099	0.236635	2	3	2	3	3	3	3	3	3	3	3	3	2	2	2	2	3	2	2	3	2	2	2
FBtr0071368	0.766753	0.433142	0.616293	0.597171	0.867778	0.672275	0.727507	0.605531	0.424686	0.552617	0.402318	0.543838	0.563717	0.486024	0.609805	0.472905	0.769142	1.10802	0.708365	0.763846	0.234775	0.314922	0.298183	0.14129	0.139611	0.176147	1	1	1	2	1	1	1	2	1	1	1	2	1	1	1	1	1	1	1	2	1	1	1
FBtr0071371	0.156687	0.423567	1.254	1.46737	1.48489	1.73525	0.940399	1.47941	0.645073	0.721911	0.670138	0.572973	0.430578	0.423233	0.791078	0.660755	1.18647	1.18538	0.95753	0.734197	0.468619	0.513421	0.553501	0.522626	0.604332	0.45583	0	1	0	1	1	1	1	1	0	1	0	1	1	1	1	1	1	1	1	1	1	1	1
FBtr0071372	0.349441	0.477025	0.774074	1.02947	1.61781	1.85658	1.74142	1.49598	0.756158	1.1313	1.20139	1.88534	1.15456	1.60781	1.07741	1.30863	1.31367	1.04356	0.988386	1.07527	0.376827	0.334643	0.505727	0.412913	0.598004	0.491542	0	0	0	0	0	0	0	0	0	0	0	0	0	0	0	0	0	0	0	0	0	0	0
FBtr0071373	0.84686	19.6109	1.64568	3.30949	2.72937	1.36878	3.71563	1.93727	1.52034	1.24142	0.710258	1.39807	2.8807	1.82046	0.946565	0.819806	1.30729	1.38494	1.23839	1.311	0.575286	1.6748	0.622313	1.51548	0.560833	1.33314	0	0	0	0	0	0	0	0	0	1	0	1	0	1	0	1	0	0	0	0	0	0	0
FBtr0071379	0.839386	2.80543	1.05686	1.3423	2.5573	1.4361	3.11873	0.539601	1.14331	2.06191	1.71394	1.26295	3.25266	5.59004	0.81358	0.590937	0.857624	0.945584	0.66326	0.838909	0.627684	0.871831	0.527473	0.491397	0.590825	0.614135	2	1	1	2	2	2	1	3	2	1	1	2	1	0	0	2	1	0	0	1	2	1	1
FBtr0071386	0.254162	1	0.150234	1	0.533685	1	5.69653	1	1.19906	7.56288	0.664261	12.3521	1.44323	1	0.997026	1	1.16848	5.43376	2.16841	4.86462	1.1312	1.08061	1.50327	1.22114	1.62589	0	0	0	0	0	0	0	0	0	0	0	0	0	2	0	0	2	4	1	1	4	4	1	1
FBtr0071387	0.226743	1	1.44129	0.282562	0.613789	4.80032	1.6386	1.82088	1.30496	0.271401	0.619933	0.473774	1.93614	0.552152	1.13754	0.659173	1.33082	1.01054	1.4594	0.943427	0.451075	1.14364	0.577581	1.21231	0.683943	1.00461	0	0	0	0	0	0	0	0	0	0	0	0	0	0	0	0	0	0	0	0	0	0	0
FBtr0071388	0.638751	51.7629	2.00627	0.419943	0.967053	2.85299	2.42035	3.13462	1.77223	1.41531	1.33553	1.4627	3.01716	1.38238	3.49586	1.04821	3.16579	2.24931	2.56918	2.40365	0.450419	2.32139	0.4381	2.00483	0.558576	1.70832	0	0	0	0	0	0	0	0	0	0	0	0	0	0	0	0	0	0	0	0	0	0	0
FBtr0071389	0.825032	3.17494	1.34945	0.514532	0.3079	3.54213	1.74905	3.27713	1.46292	0.47366	0.189039	0.906129	1.91952	0.743711	1.52345	0.649069	1.9781	2.49993	1.47841	1.92866	0.494451	0.710671	0.654991	0.752664	0.592716	0.539326	0	0	0	0	0	0	0	0	0	0	0	0	0	0	0	0	0	0	0	0	0	0	0
FBtr0071390	0.394252	4.42463	3.07711	1.0341	1.88772	3.07714	2.18448	1.95032	1.22644	0.55239	2.42665	1.66648	1.79038	0.89309	1.40757	0.787575	2.94091	2.65591	2.45824	1.77585	0.414272	0.644	0.506002	0.671145	0.591508	0.558419	0	0	0	0	0	0	0	0	0	0	0	0	0	0	0	0	0	0	0	0	0	0	0
FBtr0071391	0.463405	14.2294	2.02107	0.390664	1.21614	1.87003	1.83517	1.58935	1.71645	1.07208	1.03949	1.2732	4.40116	0.789639	2.21976	0.895237	2.44395	1.34833	2.26145	1.20259	0.539208	1.68445	0.423703	1.56492	0.508389	1.43914	0	0	0	0	0	0	0	0	0	0	0	0	0	0	0	0	0	0	0	0	0	0	0
FBtr0071393	1.95676	1.63774	1.19429	0.97638	0.738575	0.616491	1.19481	1.2605	1.15231	1.63961	0.48416	1.17974	1.6204	1.42745	1.33285	0.762733	1.18504	1.35458	1.25363	1.17804	0.336653	0.283394	0.448525	0.323625	0.397385	0.385459	0	0	0	0	1	0	0	1	1	0	0	1	1	0	0	1	1	0	0	1	1	0	0
FBtr0071395	0.125907	7.21586	0.569758	17.7357	0.341626	0.410041	0.544468	0.557345	1	1	0.133783	1	0.0761498	2.24483	0.207396	1	1	4.62564	1	1	0.766445	1.46712	0.727797	1.48641	0.522639	1.25741	0	0	0	0	0	0	0	0	0	0	0	0	0	0	0	0	0	0	0	0	0	0	0
FBtr0071397	0.127506	0.0920714	0.228815	0.146327	0.285573	0.0929961	0.277581	0.0751812	0.375672	0.145362	0.0620172	0.147031	0.445888	0.135762	0.393402	0.166676	0.14732	0.0600057	0.0782739	0.0591698	0.562365	0.360422	0.504885	0.284992	0.316295	0.303941	1	1	0	2	3	0	0	3	1	4	1	4	3	3	2	4	3	3	1	5	2	4	2
FBtr0071398	0.0556601	8.3149	0.0373992	0.898607	0.350583	2.75728	0.946801	1.73884	0.450816	0.687967	0.378215	0.599281	1.18959	0.843139	0.726368	0.708785	1.64689	1.20875	1.20825	1.68549	0.768596	1.2015	0.89587	1.18575	1.22108	0.976185	0	0	0	0	0	0	0	0	0	0	0	0	0	0	0	0	0	0	0	0	0	0	0
FBtr0071403	0.950166	6.70591	0.500867	0.392734	0.526616	1.3404	1.73431	1.48068	4.88393	74.0398	0.520087	1.16318	1.35563	1.38039	1.33241	1.29725	3.51286	0.0479656	2.20529	1.65243	0.822116	2.5635	1.12901	2.073	0.620339	1.15264	0	0	0	0	0	0	0	0	0	0	0	0	0	0	0	0	0	0	0	0	0	0	0
FBtr0071405	2.45296	1.73581	1.03696	0.898245	0.615446	0.387007	0.57878	0.392452	1.01871	0.611353	0.558516	0.817376	0.699087	1.07747	0.746888	0.871518	0.693551	0.785882	0.736423	0.767454	0.618727	0.460583	0.693877	0.621439	0.751074	0.744403	1	1	1	1	1	1	1	1	0	0	0	0	0	0	0	0	0	0	0	0	1	1	1
FBtr0071410	1.78266	29.924	1.6661	1.34202	2.48389	1.98028	2.57026	3.12691	12.6082	9.56262	2.38949	18.5068	5.65784	5.23662	3.93431	3.54942	2.87467	4.42707	3.51524	4.23726	0.825594	1.11606	1.09135	1.06382	0.219786	1.52934	0	0	0	0	0	0	0	0	0	0	0	0	0	0	0	0	0	0	0	0	0	0	0
FBtr0071415	0.129407	0.144982	1.05638	1.34371	2.58833	1.97109	1.69074	1.49334	1.09575	1.07411	1.13243	1.69563	0.88868	1.23729	0.410171	0.726252	1.45681	1.39955	4.36537	2.21681	0.822596	0.448638	0.634575	0.495068	0.758852	0.627013	0	0	0	0	0	0	0	0	0	0	0	0	0	0	0	0	0	0	0	0	0	0	0
FBtr0071419	0.284068	0.0113932	0.0203962	0.185818	0.332069	0.352606	0.14101	0.008741	0.406081	0.0378787	0.193893	0.599004	1.44186	0.615756	0.409463	0.141938	0.659905	0.343002	23.0715	11.0458	2.65954	2.56307	0.60824	1.19012	0.728262	1.17722	0	0	0	0	0	0	0	0	0	0	0	0	0	0	0	0	0	0	0	0	0	0	0
FBtr0071420	1	1	1	7.64194	0.299386	0.145443	1.08259	0.111382	1	1	0.163621	1	0.926137	1	1	1	0.460168	5.31674	0.0622084	0.129018	0.577837	1.38462	0.542522	1.58863	0.433058	1.63385	0	0	0	0	0	0	0	0	0	0	0	0	0	0	0	0	0	0	0	0	0	0	0
FBtr0071424	0.235584	0.0491004	0.0159747	0.734123	0.0208453	0.770062	0.0178096	0.00142671	0.131678	0.142084	0.125497	0.300813	1.85347	0.902634	0.466338	0.285116	0.911302	0.501753	15.0504	4.97688	2.47615	1.70571	0.976173	1.02294	1.49828	1.08147	0	0	0	0	0	0	0	0	0	0	0	0	0	0	0	0	0	0	0	0	0	0	0
FBtr0071429	0.33049	0.149545	1	1	0.295066	0.042074	0.0552296	1.11108	0.1682	1	0.0309492	0.390436	1.33397	0.559617	0.766002	0.678012	1.03364	1.31066	0.904973	0.998172	0.792363	0.592679	1.14147	0.775027	0.964817	0.968745	0	0	0	0	0	0	0	0	0	0	0	0	0	0	0	0	0	0	0	0	0	0	0
FBtr0071430	0.703402	0.355437	0.82745	1.36217	1.23715	1.75902	0.989552	1.73516	0.848152	1.21316	0.859642	0.643868	0.821098	1.1012	0.807736	1.10596	1.19917	1.32264	1.18889	1.19222	0.203272	0.36613	0.201957	0.486869	0.245377	0.504464	1	1	1	1	1	1	1	1	1	1	1	1	1	1	1	1	1	1	1	1	1	1	1
FBtr0071438	2.02049	1.68309	1.9952	1.53142	1.08883	1.33589	1.57027	2.29022	0.826941	1.44195	1.01392	1.00585	2.29434	1.57877	1.85698	1.7344	1.67464	1.77736	1.91545	1.57322	0.302938	0.207513	0.364798	0.277024	0.262654	0.240913	0	0	0	0	0	0	0	0	0	0	0	0	0	0	0	0	0	0	0	0	0	0	0
FBtr0071441	0.54914	1.20313	0.216887	0.394463	0.331729	0.612038	0.376273	0.813871	0.74351	0.929749	0.348584	0.487208	0.939228	1.51947	0.72482	0.810815	0.487445	0.977295	0.442305	1.01598	0.434704	0.383115	0.439972	0.407887	0.374149	0.454907	1	2	1	2	1	2	1	2	1	2	1	2	1	0	0	1	1	1	1	1	1	1	1
FBtr0071444	0.800206	0.285459	0.539735	0.273848	0.809026	0.608459	0.741469	0.250486	0.467661	0.343027	0.381405	0.612954	0.558817	0.563597	0.437292	0.385551	0.63824	0.48133	0.853538	0.467964	0.2737	0.325624	0.295395	0.427867	0.173744	0.479147	2	2	2	2	2	2	2	2	2	2	2	2	2	2	2	2	2	2	2	2	2	2	2
FBtr0071445	0.0689854	0.506089	0.232321	0.0644219	0.235696	3.67802	0.00992896	0.040895	0.0707174	0.00395311	0.022399	0.001732	0.1494	0.50231	0.0911031	0.107021	0.0467897	0.334945	0.0977716	0.387014	0.777478	1.97826	0.952395	2.04499	0.840258	1.63214	0	0	0	0	0	0	0	0	0	0	0	0	0	0	0	0	0	0	0	0	0	0	0
FBtr0071446	2.60996	1.64376	1.98729	1.45352	1.27244	1.58737	2.03804	2.06895	1.28204	2.11023	1.32886	2.90434	1.80393	2.76748	1.91957	1.23328	2.62328	2.68977	2.4813	2.32819	0.271945	0.283656	0.312757	0.27186	0.277191	0.157516	0	0	0	0	0	0	0	0	0	0	0	0	0	0	0	0	0	0	0	0	0	0	0
FBtr0071448	1	1	1	1	0.19672	1	0.214836	0.0700727	0.0752212	0.08735	0.138231	0.0167817	0.0505011	1	0.21262	0.108546	0.0844805	0.0769239	1	1.10533	1.05682	0.918088	1.00216	0.976197	0.760677	0.605801	0	0	0	0	0	0	0	0	0	0	0	0	0	0	0	0	0	0	0	0	0	0	0
FBtr0071449	1.33499	1.36875	2.31396	0.889839	1.00136	1.24824	1.23694	1.35372	0.530302	0.615673	0.639723	0.411899	3.36448	0.616942	2.07765	0.826266	1.4231	1.05465	1.5774	0.810441	0.547647	0.358759	0.545574	0.414255	0.39314	0.183844	0	0	0	0	0	0	0	0	0	0	0	0	0	0	0	0	0	0	0	0	0	0	0
FBtr0071450	0.151533	0.161947	0.218623	0.355163	0.524634	0.498253	0.495478	0.368177	0.172377	0.294365	0.221441	0.177217	0.575521	0.681654	0.301589	0.322771	0.282052	0.260864	0.203108	0.184905	0.500604	0.48658	0.562254	0.410781	0.546623	0.400719	2	1	1	2	2	2	2	2	3	3	3	3	3	2	2	3	2	2	2	2	3	2	2
FBtr0071451	2.58961	3.8665	1.18858	2.16484	1.32562	1.54453	0.640634	0.535029	1.23208	1.54348	1.31378	1.19925	0.891117	1.96776	1.84317	1.70141	1.24417	1.47186	0.998344	1.44089	0.410153	0.49627	0.46631	0.630068	0.573758	0.689343	0	0	0	0	0	0	0	0	0	0	0	0	0	0	0	0	0	0	0	0	0	0	0
FBtr0071458	0.842813	2.67801	0.596044	1.29448	0.898092	2.15543	1.23319	1.68381	1.10797	1.23732	0.590825	0.727828	1.95188	0.914784	1.05851	0.694731	0.753551	0.554686	0.807183	0.66272	0.406019	0.565372	0.298107	0.430283	0.293919	0.306193	0	0	0	0	0	0	0	0	0	0	0	0	0	0	0	0	0	0	0	0	0	0	0
FBtr0071459	0.0439286	0.810796	0.583318	4.57574	1.16066	0.50767	0.126706	0.198	0.628614	0.978606	0.214637	0.523562	0.519826	0.919217	0.341299	0.837658	0.856577	2.01838	0.117433	0.782034	0.78543	1.04776	0.912176	1.29873	1.07137	1.34627	0	0	0	0	0	0	0	0	0	0	0	0	0	0	0	0	0	0	0	0	0	0	0
FBtr0071460	1.42272	0.425467	0.503411	0.918914	1.11889	1.11718	1.52254	0.873432	2.14272	0.968253	1.3597	1.28231	3.65909	7.14141	1.06384	1.33729	0.397105	0.327481	0.440168	0.33845	0.716409	1.37519	0.398105	0.310773	0.401934	0.35027	3	3	3	3	3	3	3	3	3	3	3	3	3	3	3	3	3	3	3	3	3	3	3
FBtr0071462	0.161799	1	0.292277	0.0719809	0.23518	0.163636	0.647774	1	0.321778	1	1.90902	0.214023	0.0963684	1	0.650484	0.353417	0.0846778	0.613771	0.635797	10.8193	1.07625	2.00395	1.11877	0.81374	0.645389	0.913763	0	0	0	0	0	0	0	0	0	0	0	0	0	0	0	0	0	0	0	0	0	0	0
FBtr0071463	0.533279	2.0502	0.41287	0.291353	1.03042	2.4673	1.85521	1.53412	0.426797	1.31568	0.825019	0.77782	1.62341	6.74381	0.421962	0.451511	0.641247	0.589381	0.881968	0.516432	0.589055	1.15005	0.649486	0.569223	0.683945	0.595034	0	0	0	0	0	0	0	0	0	0	0	0	0	0	0	0	0	0	0	0	0	0	0
FBtr0071464	7.12081	1	1	1	0.126591	1	2.14292	0.442431	0.122837	1	0.11716	1	0.477459	27.5669	0.0361194	0.0505267	0.635029	0.408304	0.14985	1.10916	1.82744	2.45205	1.54592	0.250946	1.20361	0.323939	0	0	0	0	0	0	0	0	0	0	0	0	0	0	0	0	0	0	0	0	0	0	0
FBtr0071465	0.338888	0.496947	0.926501	1.09021	1.37484	0.979125	1.45947	1.05274	0.788637	1.21096	0.573401	0.958992	1.3393	0.751965	1.07829	1.19802	1.28813	1.67149	1.35661	2.54093	0.364552	0.471338	0.484476	0.255221	0.501189	0.304791	1	1	1	1	1	1	1	1	1	0	0	1	0	0	0	0	0	1	0	1	1	0	0
FBtr0071466	0.397394	0.434966	0.267903	0.233666	0.328547	0.18234	0.352172	1.73875	0.045689	0.0944632	0.0407911	0.0203998	0.231109	0.167983	0.0724777	0.110945	0.191263	0.23851	1	0.118073	0.955225	1.51527	0.658023	1.43447	0.160239	1.13629	0	0	0	0	0	0	0	0	0	0	0	0	0	0	0	0	0	0	0	0	0	0	0
FBtr0071468	0.734753	0.389443	0.612085	0.360171	0.310848	0.34919	0.274296	1	0.0235284	0.0199078	0.00790568	0.00511706	0.478338	2.62224	0.458834	0.527893	0.613682	2.36931	0.122838	2.14064	0.707036	1.03237	0.91114	1.02014	0.467926	0.604765	0	0	0	0	0	0	0	0	0	0	0	0	0	0	0	0	0	0	0	0	0	0	0
FBtr0071469	0.0989143	4.21074	0.872821	2.81869	0.796064	0.369475	0.229436	0.0311031	0.669603	0.149654	0.716328	4.68106	1	12.8638	1.63306	8.92985	4.47104	6.61835	12.7321	0.84486	1.66347	1.03166	0.567415	1.04256	0.784856	1.07723	0	0	0	0	0	0	0	0	0	0	0	0	0	0	0	0	0	0	0	0	0	0	0
FBtr0071470	3.30645	1.92623	1.4828	1.04568	1.07778	0.80396	1.9261	1.19058	1.45534	2.67335	1.34895	2.41987	0.802001	2.05941	1.32143	1.4644	1.41868	1.68184	1.72919	1.60306	0.427967	0.353493	0.454558	0.462312	0.497595	0.389389	0	0	0	0	0	0	0	0	0	0	0	0	0	0	0	0	0	0	0	0	0	0	0
FBtr0071471	0.248868	1	0.694793	1	0.229992	1	0.640889	1	0.0300773	1	0.0445946	1	0.0831344	1	0.0757348	1	1	1	0.607526	1	0.937286	0	0.916458	0	0.547664	0	0	0	0	0	0	0	0	0	0	0	0	0	0	0	0	0	0	0	0	0	0	0	0
FBtr0071472	0.895152	0.723693	1.23273	0.329781	0.386623	1.30301	1.4177	1.64092	0.816333	0.855581	0.504138	0.880061	0.993005	0.701279	1.03804	1.05452	1.57806	1.36475	1.91964	1.34488	0.438962	0.38723	0.457593	0.479938	0.460468	0.585795	0	0	0	0	0	0	0	0	0	0	0	0	0	0	0	0	0	0	0	0	0	0	0
FBtr0071481	0.312916	22.5118	1.62447	1.77734	3.04411	2.63679	2.62782	1.15822	3.22172	1.41258	1.98719	1.6337	3.37565	2.44132	3.16185	1.33379	3.78693	1.81112	3.73787	2.41855	0.405363	1.67474	0.506429	1.63857	0.639033	1.47342	0	0	0	0	0	0	0	0	0	0	0	0	0	0	0	0	0	0	0	0	0	0	0
FBtr0071484	0.326048	0.272779	0.746164	1.65177	1.42989	0.497842	1.29094	1.05977	2.60103	0.0116661	0.6716	0.0587731	0.43044	1.32234	0.23235	0.0304787	0.0617513	0.146278	0.0237607	0.0412377	1.021	1.19903	0.686727	1.08769	0.536822	0.708842	0	0	0	0	0	0	0	0	0	0	0	0	0	0	0	0	0	0	0	0	0	0	0
FBtr0071486	0.198695	5.04195	0.247545	0.286523	0.646677	0.230049	0.761652	0.435447	0.375121	0.946378	0.519654	2.57678	0.525588	1.18441	0.108565	0.552118	0.0647452	0.774805	1	0.172743	0.67996	1.24394	0.487989	1.20232	0.609035	1.57752	0	0	0	0	0	0	0	0	0	0	0	0	0	0	0	0	0	0	0	0	0	0	0
FBtr0071487	0.0901165	0.169356	0.483269	1.60344	0.745301	1.61894	1.00408	0.791426	0.424616	0.501903	0.474742	0.695827	0.91098	0.674924	0.556145	0.654421	0.567564	0.829094	0.624276	0.777425	0.44024	0.543941	0.577348	0.661078	0.671765	0.669877	0	0	0	0	2	2	2	2	2	2	2	2	2	2	2	2	2	2	2	2	2	2	2
FBtr0071490	1	1	1	1	1	1	0.216554	0.0703905	0.106757	0.160923	0.788542	0.0163309	1	1	1.11965	0.124016	1	0.0772702	1	1.10529	0.435756	0.887969	0.605945	0.932299	0.487134	0.605532	0	0	0	0	0	0	0	0	0	0	0	0	0	0	0	0	0	0	0	0	0	0	0
FBtr0071491	0.621605	1.57893	1.09989	1.22334	1.41234	0.956881	1.61713	1.08629	0.783032	0.831672	0.801639	0.424776	1.08472	1.00511	1.40928	0.64794	0.786329	0.94109	0.731109	0.675087	0.333401	0.346152	0.372044	0.381296	0.364745	0.221332	1	1	1	1	1	1	1	1	1	1	1	1	1	1	1	1	0	0	0	0	0	0	0
FBtr0071492	0.314022	2.80712	0.570201	0.0578524	0.145077	0.0471339	0.0978182	0.0584287	0.157912	0.0183925	0.240574	0.0203632	0.131753	2.05677	0.344928	0.238761	0.11697	0.0392502	0.16259	0.0672901	0.641652	1.87394	0.6795	2.25229	0.757709	1.85331	0	0	0	0	0	0	0	0	0	0	0	0	0	0	0	0	0	0	0	0	0	0	0
FBtr0071493	0.159241	0.866346	0.328023	1.05908	0.544768	1.0385	1.03257	0.751198	0.404643	0.5016	0.364303	0.380928	0.52817	1.13287	0.460023	0.352159	0.335219	0.25278	0.360806	0.305724	0.513572	0.518201	0.638215	0.363829	0.733737	0.15781	0	2	0	2	1	2	1	2	3	5	3	5	4	6	4	6	0	5	0	5	0	5	0
FBtr0071494	0.0774733	0.189107	0.406702	0.427483	1.45069	1.34572	1.09416	1.57365	1.01037	0.609463	0.968292	0.808986	1.11288	1.04817	1.19464	1.01195	1.22908	1.26407	1.47061	1.09913	0.439133	0.458825	0.599568	0.650074	0.827975	0.767264	0	0	0	0	0	0	0	0	0	0	0	0	0	0	0	0	0	0	0	0	0	0	0
FBtr0071497	0.52238	0.106218	0.435931	0.185506	0.155031	0.0646605	0.251639	0.225718	0.301759	0.226553	0.148616	0.135675	0.200033	0.284582	0.204485	0.26717	0.407606	0.415477	0.531178	0.34794	0.466995	0.480477	0.499428	0.420802	0.491757	0.503611	0	0	0	0	0	0	0	0	0	0	0	0	1	0	0	1	0	0	0	0	0	0	0
FBtr0071498	3.89887	5.41346	3.161	3.17399	3.47498	3.10879	2.90548	3.00879	2.37597	2.45359	1.86204	3.22386	4.65088	3.31369	3.32894	2.46203	3.66843	3.6394	3.93713	2.91495	0.242296	0.255431	0.251043	0.302203	0.127406	0.315573	0	0	0	0	0	0	0	0	0	0	0	0	0	0	0	0	0	0	0	0	0	0	0
FBtr0071500	0.220858	0.506648	0.635744	0.76019	1.28889	1.32601	1.2856	0.958996	0.841761	0.485857	0.589477	0.747137	0.9406	0.773298	0.727177	0.544854	0.924249	0.750461	0.955866	0.767155	0.382476	0.323221	0.518453	0.39297	0.610932	0.389389	0	0	0	0	0	0	0	0	0	0	0	0	0	0	0	0	0	0	0	0	0	0	0
FBtr0071502	0.0654935	0.568842	0.138867	0.186409	0.30597	0.121927	0.19391	0.25272	0.194094	0.0760432	0.0852239	0.140599	0.330865	0.111848	0.134052	0.170005	0.118699	0.106476	0.124131	0.105147	0.52373	0.785173	0.535275	0.798131	0.575544	0.701793	0	0	0	0	1	0	0	1	1	0	0	1	1	0	0	1	0	0	0	0	1	0	0
FBtr0071503	0.107803	0.116715	0.399773	0.708524	1.53167	1.4771	2.07507	0.897212	0.550369	1.06645	0.784473	1.01162	0.524247	1.21869	0.421228	0.703982	0.480949	0.436553	0.652892	0.550804	0.790023	0.487545	0.822916	0.513717	0.903597	0.700977	0	0	0	0	0	0	0	0	0	0	0	0	0	0	0	0	0	0	0	0	0	0	0
FBtr0071504	0.0176713	1	0.00551345	0.0300361	0.0148529	0.135114	0.0756204	1	0.002939	0.0144932	0.0227992	0.00540937	0.511095	10.9307	0.155946	0.176505	1	1	1	9.19842	1.45698	1.74924	1.1504	1.35842	1.12255	0.981751	0	0	0	0	0	0	0	0	0	0	0	0	0	0	0	0	0	0	0	0	0	0	0
FBtr0071505	1	1	0.126057	1	0.0471463	1	0.121424	0.0703905	0.192919	0.168121	0.50467	0.0616568	1	1	0.309271	0.271211	1	0.0772702	1	1.10529	0.79776	0.824872	1.09693	0.898745	1.3976	0.605532	0	0	0	0	0	0	0	0	0	0	0	0	0	0	0	0	0	0	0	0	0	0	0
FBtr0071506	0.118465	0.194867	0.142436	1	0.0529835	0.107868	0.0833598	0.106127	1.28055	0.142195	0.0742956	0.325798	0.198386	2.9301	0.263951	0.328567	0.34827	0.0616067	0.64336	3.21862	1.18806	1.43694	1.66203	1.10754	0.395463	1.23174	0	0	0	0	0	0	0	0	0	0	0	0	0	0	0	0	0	0	0	0	0	0	0
FBtr0071507	1	1	0.22389	1	0.0471463	1	0.216554	0.0703905	0.635603	0.160923	0.0363797	0.0163309	1	1	0.138992	0.124016	1	0.0772702	1	1.10529	0.824194	0.887969	1.05961	0.932299	1.14714	0.605532	0	0	0	0	0	0	0	0	0	0	0	0	0	0	0	0	0	0	0	0	0	0	0
FBtr0071510	0.0899696	0.478271	0.193227	0.45653	0.575309	0.728641	0.537432	0.760838	0.293172	0.32122	0.0916489	0.162498	0.331664	0.288555	0.146373	0.173895	0.457847	0.349128	0.394318	0.405424	0.57534	0.494677	0.724336	0.476911	0.698146	0.26549	0	0	0	0	0	0	0	0	0	0	0	0	0	0	0	0	0	0	0	0	0	0	0
FBtr0071511	1.98234	1.8492	1.02218	0.924548	0.709206	0.201696	0.177822	0.171366	0.75371	0.687048	0.697759	0.412019	0.350662	0.624336	0.429532	0.674303	0.480776	0.509096	0.543674	0.401679	0.70562	0.745455	0.674917	0.889623	0.778987	1.00324	1	0	0	1	1	0	0	1	1	0	0	1	0	0	0	0	1	0	0	1	1	0	0
FBtr0071512	0.111308	1	0.0267833	1	0.0504248	0.0857839	0.0560077	0.0646374	0.30443	0.302676	0.120457	0.1534	0.0136506	1.20648	0.258876	0.563993	0.459933	0.0368054	0.0108717	1.37795	1.06895	0.900128	0.907788	1.02656	0.585129	0.993289	0	0	0	0	0	0	0	0	0	0	0	0	0	0	0	0	0	0	0	0	0	0	0
FBtr0071517	0.197007	1	0.139209	1	0.094218	0.147262	0.188599	0.112831	0.0666955	0.0400413	0.040591	0.0357169	0.0958891	1	0.0843779	0.131261	1	1	0.0606707	0.588294	1.45927	0.89559	0.532937	1.22001	0.308475	0.889281	0	0	0	0	0	0	0	0	0	0	0	0	0	0	0	0	0	0	0	0	0	0	0
FBtr0071519	0.425944	7.88125	0.584148	0.561152	1.11078	1.21162	1.59918	1.41252	1.50524	9.317	0.867454	1.16166	1.20021	0.885426	0.892399	0.767854	0.598998	0.842402	0.63602	0.585046	0.42725	1.32506	0.47129	1.09059	0.573751	1.23943	0	0	0	0	0	0	0	0	0	0	0	0	0	0	0	0	0	0	0	0	0	0	0
FBtr0071520	1.3007	1.30865	1.57501	2.07453	2.36123	2.8459	1.86162	3.71499	0.783828	1.42922	0.872881	1.0715	1.19712	1.25719	0.896508	1.13213	1.588	2.39234	2.41909	1.68992	0.396985	0.458353	0.412781	0.496157	0.255368	0.415143	0	0	0	0	0	0	0	0	0	0	0	0	0	0	0	0	0	0	0	0	0	0	0
FBtr0071522	1.87527	1.26738	1.51669	0.940852	1.167	0.882545	1.20981	1.39609	0.580628	0.766948	0.515814	0.947687	1.05731	0.961046	0.753995	0.835652	1.41875	1.28582	1.5621	1.28654	0.383175	0.214454	0.460894	0.235387	0.227464	0.222226	1	1	1	1	1	1	1	1	1	1	1	1	1	1	1	1	1	1	1	1	1	1	1
FBtr0071526	1.7787	2.24489	0.913697	1.2858	1.00036	0.890107	0.725211	0.45122	0.991475	0.939266	0.849782	0.657636	0.901305	0.757905	1.66858	0.915001	0.90782	0.744638	0.720054	0.900339	0.354202	0.505413	0.358867	0.590836	0.420027	0.627878	1	1	1	1	1	1	1	1	0	1	0	1	1	1	1	1	1	1	1	1	1	1	1
FBtr0071528	0.47838	2.62711	1.993	0.177432	1.185	1.68588	1.04934	1.44718	0.321848	0.877023	0.321968	1.26912	0.715138	0.420776	0.685945	0.38642	0.405675	0.386649	0.316694	0.29845	0.715872	0.826995	0.734433	0.608301	0.530908	0.679922	0	0	0	0	0	0	0	0	0	0	0	0	0	0	0	0	0	0	0	0	0	0	0
FBtr0071530	1.09304	1.12727	1.68096	1.13649	1.09062	1.36208	1.06069	1.71045	0.590623	0.85837	0.439111	0.752279	1.18826	0.988096	0.939083	1.06421	1.29174	1.49455	1.28003	1.27577	0.332043	0.247528	0.442888	0.299851	0.243734	0.204941	0	0	0	0	0	0	0	0	0	0	0	0	0	0	0	0	0	0	0	0	0	0	0
FBtr0071532	2.36125	1.62581	1.72196	1.57013	2.44692	1.71464	1.89347	1.85928	1.54579	1.40108	1.42196	1.85908	1.46141	1.87441	1.4604	1.43386	1.62586	1.72471	1.50659	1.52021	0.215454	0.106255	0.223166	0.106273	0.16767	0.0745258	0	0	0	0	0	0	0	0	0	0	0	0	0	0	0	0	0	0	0	0	0	0	0
FBtr0071533	0.77065	2.43592	3.72817	2.27942	3.11278	2.1178	2.32352	3.62772	1.40358	1.12909	1.93103	0.942269	1.63579	0.812039	1.96565	1.53004	2.29689	2.88875	2.26658	2.00704	0.389975	0.453214	0.492523	0.467209	0.51479	0.262841	0	1	0	1	0	1	0	1	0	1	0	1	0	1	0	1	0	1	0	1	0	1	0
FBtr0071534	0.0478049	2.74888	0.011642	0.0869033	0.0215972	0.361218	0.0259449	1.92816	0.603195	3.34783	1.34305	1.08777	1.17452	2.28223	1.15143	1.22701	1.14364	1	0.93099	6.33494	0.87742	0.894946	1.5837	0.821544	0.570589	0.99187	0	0	0	0	0	0	0	0	0	0	0	0	0	0	0	0	0	0	0	0	0	0	0
FBtr0071539	0.81971	2.26689	1.89139	2.7055	1.45917	2.40354	1.55323	7.85792	1.50506	4.28144	0.851732	5.25704	1.6857	1.19614	1.49164	7.25789	1.76573	23.1688	2.08736	1.10945	0.269241	1.14093	0.314999	0.527003	0.312902	0.710484	0	0	0	0	0	0	0	0	0	0	0	0	2	0	0	2	2	0	0	2	1	0	0
FBtr0071541	0.980936	1.58833	1.14261	4.59508	0.701927	1.74368	1.03417	0.840596	1.30289	2.12805	1.20211	7.09067	3.76903	0.43074	1.53512	27.3825	1.06858	1.54192	1.1718	1.24564	0.620469	1.68053	0.198258	0.793236	0.194617	0.752718	0	0	0	0	0	0	0	0	0	0	0	0	0	0	0	0	0	0	0	0	0	0	0
FBtr0071542	6.77248	0.51293	5.86852	3.97231	0.391901	6.02221	0.534221	0.811165	5.41994	0.901566	1.97685	0.568313	0.662396	0.273794	0.535948	0.27851	1.22481	0.0234261	0.174606	17.838	1.10285	1.77187	0.817378	1.08713	1.00312	0.933663	0	0	0	0	0	0	0	0	0	0	0	0	0	0	0	0	0	0	0	0	0	0	0
FBtr0071543	0.161807	4.64162	1.10732	0.289065	0.825297	0.494302	0.428209	1.24168	2.43145	0.735027	0.236287	0.685438	0.922507	0.419847	0.827534	0.27272	0.811324	0.158112	6.0553	3.77717	1.27479	1.25179	0.980153	1.22019	0.663892	1.21506	0	0	0	0	0	0	0	0	0	0	0	0	0	0	0	0	0	0	0	0	0	0	0
FBtr0071544	0.409691	0.193082	0.18616	1	1	1	0.24742	3.37665	0.0150865	19.1952	0.0427159	30.506	0.124141	1	0.165891	1	0.287366	1	0.154486	1	1.07566	1.74722	1.14964	1.37602	0.806439	0.988497	0	0	0	0	0	0	0	0	0	0	0	0	0	0	0	0	1	0	0	1	1	0	0
FBtr0071545	0.361347	0.864816	2.99678	1.75601	3.0068	2.61184	2.13939	3.71967	1.81095	0.923951	1.55582	0.372514	1.50903	0.703212	1.42857	1.25156	3.42969	2.57055	2.17805	1.68881	0.449232	0.637056	0.502494	0.739377	0.58547	0.544367	0	0	0	0	0	0	0	0	0	0	0	0	0	2	0	2	0	2	0	2	0	2	0
FBtr0071546	2.49627	1.92617	1.41304	1.6738	2.05734	1.54697	1.41959	0.536696	1.61634	1.37125	2.15688	1.89096	1.19396	2.00227	1.501	1.0764	1.20708	1.05101	1.4699	1.07146	0.263526	0.337819	0.238643	0.343426	0.286014	0.42943	4	4	4	4	4	4	4	4	4	4	4	4	4	4	4	4	3	4	3	4	4	4	4
FBtr0071547	2.27427	1.80352	0.865818	0.990506	1.48835	1.40561	1.1541	0.875642	0.599493	0.64911	0.594489	0.998635	1.03649	1.00203	0.88797	0.829742	1.20544	1.33858	1.30405	1.10103	0.43117	0.30376	0.553356	0.370498	0.420701	0.333343	0	1	0	1	0	1	0	1	0	1	0	1	0	0	0	0	0	1	0	1	0	1	0
FBtr0071548	0.989992	0.56513	0.460959	0.378392	0.353477	0.284261	0.423149	0.30599	0.216116	0.26464	0.171963	0.209632	0.336031	0.396189	0.401655	0.336258	0.377465	0.362123	0.324841	0.357823	0.551508	0.277028	0.674705	0.375407	0.524595	0.332864	2	3	2	3	2	3	2	3	2	2	1	3	2	3	2	3	2	1	0	3	2	3	2
FBtr0071549	2.1	1.35467	0.961862	1.04245	1.45564	1.29388	1.31273	1.40165	1.07381	1.00139	0.921818	1.18443	1.18765	0.988693	1.11991	0.966554	1.26197	1.19669	1.25756	1.11378	0.264647	0.136576	0.338177	0.136396	0.326501	0.125677	0	0	0	0	0	0	0	0	0	0	0	0	0	0	0	0	0	0	0	0	0	0	0
FBtr0071553	0.0575608	0.216526	0.212634	0.266594	0.366589	0.34294	0.52943	0.307694	0.104131	0.27725	0.219571	0.0872341	0.389194	0.146668	0.223424	0.130437	0.27798	0.251767	0.241952	0.173251	0.526744	0.378682	0.702814	0.360855	0.695057	0.192055	0	1	0	1	1	0	0	1	3	4	2	5	5	4	3	6	0	3	0	4	4	4	3
FBtr0071554	0.09712	1	1.40948	0.346076	2.04384	0.726474	1.45875	1.6561	18.5364	0.050052	0.596469	4.69004	0.106231	1.21522	0.0861975	0.0338371	0.0643154	0.1627	1	1	2.23018	1.26519	1.77525	1.20384	0.656595	0.592296	0	0	0	0	0	0	0	0	0	0	0	0	0	0	0	0	0	0	0	0	0	0	0
FBtr0071555	1	1	1.55911	57.1546	1.61409	0.427827	1.08844	1.64228	0.0675418	1	0.40181	3.97424	2.38364	1.21913	1.1293	1.2622	1.85115	1.18754	0.598942	3.01256	0.601599	2.44692	0.647544	2.08996	0.240243	1.86435	0	0	0	0	0	0	0	0	0	0	0	0	0	1	0	1	0	0	0	0	0	1	0
FBtr0071556	0.63363	1.46629	1.29344	1.11174	1.15979	0.682295	1.16669	0.522033	0.385581	0.349474	0.315258	0.576353	0.929203	0.640866	0.513637	0.48895	0.617312	0.436087	0.438533	0.386935	0.484719	0.532213	0.524488	0.535794	0.275553	0.451766	0	1	0	1	0	1	0	1	0	0	0	0	0	0	0	0	0	0	0	0	0	0	0
FBtr0071559	23.6727	3.29197	0.821579	0.0759309	2.4099	2.42085	3.07867	3.94926	3.16163	1.58717	0.815733	1.17475	5.28928	1.13912	4.07163	0.940178	4.26887	2.75103	5.06754	2.23012	1.26318	0.606377	1.56995	0.68416	1.44431	0.695178	0	0	0	0	0	0	0	0	0	0	0	0	0	0	0	0	0	0	0	0	0	0	0
FBtr0071560	0.116687	17.5534	0.442701	0.292302	0.463391	2.21398	1.11978	0.784846	0.844523	7.19517	0.188197	2.68555	1.34778	1.02089	0.73998	0.630127	2.15177	0.192547	0.174257	0.689586	0.843963	1.62861	0.730115	1.28162	0.785142	1.58669	0	0	0	0	0	1	0	1	0	0	0	0	1	1	1	1	0	1	0	1	0	0	0
FBtr0071561	0.103086	2.52948	0.460088	0.906478	0.373123	1.50959	1.04701	0.805694	4.92876	3.10359	0.58286	0.453634	0.838059	0.743025	0.667796	0.624775	1.10665	0.283742	1	0.245845	1.2419	0.867874	1.46426	0.678781	0.801998	0.550396	0	0	0	0	0	0	0	0	0	0	0	0	0	0	0	0	0	0	0	0	0	0	0
FBtr0071562	0.1065	0.27469	0.187589	0.54982	0.815702	0.707322	0.917556	0.57626	0.780154	0.346498	0.413876	0.791457	0.691714	1.2764	0.523333	0.545964	0.481727	0.325211	0.400188	0.372064	0.505245	0.518312	0.647463	0.37011	0.826377	0.344904	1	1	1	1	1	1	1	1	1	1	1	1	1	1	1	1	1	1	1	1	1	1	1
FBtr0071563	0.0874353	0.109811	0.512012	0.518884	0.869234	0.710945	0.829525	0.411192	0.432341	0.291951	0.452497	0.598035	0.326696	0.516811	0.481204	0.465454	0.430586	0.401802	0.401737	0.374247	0.470679	0.377886	0.544056	0.49401	0.629985	0.574147	2	2	1	3	4	5	4	5	4	5	4	5	4	5	4	5	4	5	4	5	4	5	4
FBtr0071567	0.428145	1.81615	0.281295	0.0417636	0.222523	0.833968	0.942555	0.458782	0.50111	1.36544	0.371402	1.15045	0.633212	0.329294	0.4365	0.232766	0.712667	0.548983	0.847884	0.578225	0.445362	0.755781	0.562583	0.676742	0.698997	0.96255	0	0	0	0	0	0	0	0	1	0	0	1	1	1	1	1	1	1	1	1	0	0	0
FBtr0071569	1.62058	1.12399	2.492	1.6248	2.22761	1.64554	1.28718	1.30637	1.01823	1.09055	1.31662	1.13828	1.32221	1.00447	1.4171	1.33985	2.69869	2.30117	2.57742	2.22915	0.351243	0.314825	0.349603	0.192358	0.289027	0.17808	0	0	0	0	0	0	0	0	0	0	0	0	0	0	0	0	0	0	0	0	0	0	0
FBtr0071570	4.79687	0.0866864	2.04997	1	0.933521	5.90501	0.745924	0.0652801	0.00408782	0.00259351	0.0178146	0.00101531	0.760715	0.0694907	0.807287	0.304072	0.463906	1	0.594964	2.44833	1.26382	1.70899	1.2736	1.99555	0.876246	1.58407	0	0	0	0	0	0	0	0	0	0	0	0	0	0	0	0	0	0	0	0	0	0	0
FBtr0071573	1.86576	1.64902	1.928	0.945417	0.699648	0.422985	0.411068	0.204343	0.987501	0.712957	0.825303	0.620951	1.1173	0.65293	1.18649	0.669558	1.07861	1.19131	1.2053	0.9243	0.417512	0.50828	0.56389	0.663404	0.639293	0.797824	1	1	1	1	1	1	1	1	1	1	1	1	1	1	1	1	1	1	1	1	1	1	1
FBtr0071575	0.522585	0.371828	1.1226	0.693225	0.940867	1.21688	0.854555	0.587287	0.432335	0.622426	0.462596	0.596599	1.0551	0.520432	0.485887	0.509917	1.09755	0.972405	0.785529	0.749864	0.3593	0.360335	0.39962	0.416269	0.292098	0.500339	1	1	1	1	1	1	1	1	1	1	1	1	1	1	1	1	1	1	1	1	1	1	1
FBtr0071576	0.146748	0.0737925	0.367056	0.632306	0.657286	0.840938	0.68114	0.970922	0.549668	0.702981	0.503147	0.531127	0.294982	0.526608	0.448798	0.680172	0.64366	0.692043	0.706314	0.687381	0.371481	0.373874	0.414091	0.498077	0.54995	0.628844	0	0	0	0	0	0	0	0	0	0	0	0	0	0	0	0	0	0	0	0	0	0	0
FBtr0071580	1.65064	4.98456	1.34009	0.896778	1.56495	2.11198	1.45757	1.99046	2.10793	1.32236	1.51112	0.578001	4.81674	2.26898	2.2367	1.14085	2.06681	2.65118	2.71096	2.07329	0.480621	0.619877	0.166526	0.801984	0.0894439	0.699838	0	0	0	0	0	0	0	0	0	0	0	0	0	0	0	0	0	0	0	0	0	0	0
FBtr0071582	1.51556	0.785169	0.353554	0.795024	1.09082	0.972871	0.725159	0.341414	0.50108	0.871901	0.349549	0.510935	0.526803	0.967648	0.382816	0.49265	0.301066	0.295572	0.297113	0.288909	0.666788	0.43665	0.615404	0.334093	0.540074	0.371752	0	0	0	0	0	0	0	0	0	0	0	0	0	0	0	0	0	0	0	0	0	0	0
FBtr0071583	0.313446	2.00835	1.28576	1.16146	0.695433	0.665895	0.795008	0.567791	0.560302	0.286852	0.341189	1.17524	0.956034	0.569991	0.652009	0.362617	0.926273	1.077	0.913753	0.757949	0.399594	0.591819	0.53893	0.62683	0.518189	0.598092	2	2	2	2	2	2	2	2	2	2	2	2	2	2	2	2	2	1	1	2	2	2	2
FBtr0071590	0.207319	0.366276	0.674125	0.77169	1.10325	0.855989	0.750087	0.508398	0.50126	0.50558	0.678273	0.65235	0.569468	0.824529	0.43659	0.523668	0.942027	0.835519	1.00828	0.745658	0.402081	0.261789	0.452066	0.301434	0.539039	0.363819	2	3	2	3	3	3	2	4	3	3	2	4	2	3	2	3	2	3	2	3	2	3	2
FBtr0071592	0.401556	0.975278	1.43434	0.886807	1.45997	1.89406	1.07585	0.810483	0.546991	0.328218	0.627604	0.432645	0.669933	0.389945	0.385505	0.411713	0.903938	0.408615	0.716618	0.520385	0.474176	0.676915	0.501308	0.62635	0.451213	0.443305	0	0	0	0	0	0	0	0	0	0	0	0	0	0	0	0	0	0	0	0	0	0	0
FBtr0071600	0.256466	0.12014	0.444871	0.473291	0.831327	0.918917	1.6004	1.29241	0.934485	1.69658	0.585782	0.960972	1.63721	1.26801	1.83309	1.2055	0.845125	0.812319	1.07067	1.3339	0.53069	0.454589	0.611224	0.617907	0.759631	0.73022	0	0	0	0	1	0	0	1	1	1	1	1	1	0	0	1	0	1	0	1	1	1	1
FBtr0071606	0.106726	0.0176254	0.601717	0.111368	1.00842	0.894094	1.10783	1.67678	1.44878	0.781238	0.597013	1.15946	0.760433	0.702742	0.945579	1.09865	1.34084	1.36108	1.59897	1.60014	0.475648	0.598478	0.582898	0.81553	0.645278	1.14805	0	0	0	0	2	1	0	3	3	0	0	4	3	1	1	3	3	2	2	3	1	1	0
FBtr0071607	0.234541	0.170296	0.73024	0.352739	0.622772	0.700435	1.57756	1.27664	3.87591	2.56543	1.05289	1.2581	1.53208	1.14304	1.54042	0.970927	1.68717	1.09513	3.3669	1.78121	0.717444	0.608006	0.976574	0.824257	0.715017	0.779003	0	0	0	0	0	0	0	0	0	0	0	0	0	0	0	0	0	0	0	0	0	0	0
FBtr0071608	0.17703	0.156102	0.910199	1.08773	1.35635	2.61286	0.881127	1.02961	0.794633	0.692254	0.420442	0.642285	0.541993	0.796507	0.437857	0.586501	1.1135	1.65296	0.697329	0.878511	0.481695	0.673721	0.544658	0.811167	0.586308	0.835586	0	0	0	0	0	1	0	1	0	0	0	0	0	0	0	0	0	0	0	0	0	0	0
FBtr0071609	0.875606	0.716416	1.04041	0.782807	1.56846	1.39519	1.27197	1.41544	0.495157	0.725134	0.691196	0.641457	0.457303	0.482103	0.839901	0.664674	1.22682	1.5885	1.21464	1.06604	0.372731	0.410834	0.394634	0.379053	0.252834	0.352336	2	2	2	2	2	2	2	2	2	1	1	2	0	2	0	2	2	2	2	2	2	0	0
FBtr0071610	0.287508	1.4979	0.47502	0.722235	0.744579	0.692577	0.628012	0.33026	0.301854	0.393169	0.369997	0.335404	0.757548	0.63797	0.403304	0.425803	0.381912	0.220091	0.383612	0.266276	0.368765	0.68296	0.396379	0.673014	0.370634	0.606289	4	12	4	12	12	14	12	14	10	11	9	12	11	13	11	13	9	11	9	11	10	13	10
FBtr0071611	1	1	0.274737	5.37239	1.80842	22.5896	25.2956	8.43365	8.58863	1.22067	1.27842	0.0321805	5.57394	2.56156	2.36563	1.56752	2.07726	6.48597	2.1711	2.72416	1.49399	1.28397	1.5304	1.32427	1.71256	0.998978	0	0	0	0	0	0	0	0	0	0	0	0	0	0	0	0	0	0	0	0	0	0	0
FBtr0071612	0.0886325	1	0.161298	1	0.141579	7.63311	0.0500164	0.0936188	1.2644	0.387557	4.20443	2.32375	0.1769	12.0616	0.118677	0.0600656	4.35271	0.639558	6.66607	32.9622	1.41006	1.77569	1.66873	1.36507	0.45846	1.4368	0	0	0	0	0	0	0	0	0	0	0	0	0	0	0	0	0	0	0	0	0	0	0
FBtr0071613	0.543301	0.508128	0.612639	0.667711	0.730194	0.620417	0.575447	0.596431	0.499107	0.700597	0.56306	0.684651	0.318586	0.657932	0.468632	0.39621	0.473447	0.429382	0.30508	0.295045	0.252824	0.253144	0.135156	0.113337	0.132611	0.111902	3	3	3	3	3	3	3	3	3	3	3	3	3	3	3	3	3	3	3	3	3	3	3
FBtr0071615	0.970932	1.24407	2.16719	1.01824	1.1567	0.33486	0.541462	0.289797	0.89393	0.558383	1.2555	0.489868	0.82959	0.380028	0.768095	0.483466	1.23233	0.933907	1.04215	0.854006	0.404899	0.499378	0.472406	0.591065	0.569656	0.667838	2	3	2	4	2	3	2	4	1	3	1	4	1	3	1	4	2	2	1	4	2	3	2
FBtr0071616	1.8923	0.789804	1.32506	1.21533	2.84324	2.26823	1.71439	1.68649	1.75478	1.47213	1.82464	1.30581	0.964743	0.671929	1.38172	0.659076	2.34155	0.756768	2.64133	1.09273	0.317115	0.43421	0.267491	0.341602	0.331706	0.426238	0	0	0	0	0	0	0	0	0	0	0	0	0	0	0	0	0	0	0	0	0	0	0
FBtr0071617	2.75838	2.229	2.28066	1.54956	1.20426	0.76496	0.690126	0.68801	0.904569	0.80674	0.538911	0.55975	0.764936	0.721344	0.959519	0.76539	1.38625	1.66938	1.16039	0.995865	0.566597	0.511462	0.652526	0.594448	0.549181	0.55591	0	0	0	0	1	0	0	1	1	0	0	1	0	0	0	0	0	0	0	0	0	0	0
FBtr0071618	0.102401	0.16231	1.10224	1.08703	1.86713	2.13394	1.65432	1.86403	1.34814	0.768205	0.619362	1.32813	0.757578	0.939816	0.770005	1.05028	1.59315	2.45721	1.523	1.6229	0.493773	0.51261	0.592166	0.589417	0.667213	0.675069	0	0	0	0	0	0	0	0	0	0	0	0	0	0	0	0	0	0	0	0	0	0	0
FBtr0071619	0.162109	3.54528	0.381468	1.09542	0.248215	1.54356	1.03207	1.42372	1.50035	2.48951	0.104912	0.065193	1.21607	1.16825	0.457724	0.452653	0.382883	0.128102	0.0927727	4.88216	0.904638	0.922448	0.990043	0.706852	0.865257	0.584534	0	0	0	0	0	0	0	0	0	0	0	0	0	0	0	0	0	0	0	0	0	0	0
FBtr0071620	1	1	1	1	0.307269	1	0.198585	1	0.0329333	0.0526585	0.0509205	0.0389781	0.0202255	0.123959	0.076953	0.0885366	0.0771215	5.08891	0.121044	8.12807	1.3335	1.53725	1.04632	0.722581	0.692138	0	0	0	0	0	0	0	0	0	0	0	0	0	0	0	0	0	0	0	0	0	0	0	0
FBtr0071621	1	1	1	1	0.095753	1	0.321228	1	0.00360864	0.0101297	0.00654484	0.0168455	0.203107	0.125465	0.143221	0.174523	0.0739025	0.650275	0.116222	0.659251	1.28974	0.777183	1.1755	0.759037	0.771469	0	0	0	0	0	0	0	0	0	0	0	0	0	0	0	0	0	0	0	0	0	0	0	0
FBtr0071623	0.311865	1.29851	0.436654	0.659884	0.642898	0.550802	0.667418	0.37103	0.312333	0.407086	0.342154	0.27401	0.622921	0.554141	0.300078	0.394237	0.242492	0.164578	0.236425	0.169401	0.413472	0.679726	0.362402	0.625676	0.330837	0.560522	0	0	0	0	0	0	0	0	0	0	0	0	0	0	0	0	0	0	0	0	0	0	0
FBtr0071624	0.2845	1.53186	0.587028	0.238169	2.19706	1.55052	1.74988	1.66643	1.85971	0.644007	0.401439	0.121755	2.48859	0.663901	1.57578	0.528019	2.13482	1.19234	1.48135	1.24507	0.533281	0.605357	0.717218	0.737251	0.759368	0.541421	0	0	0	0	0	0	0	0	0	0	0	0	0	0	0	0	0	0	0	0	0	0	0
FBtr0071625	0.420872	10.4407	0.925865	1.6818	2.57599	3.28826	1.75099	3.18008	4.35448	1.68898	0.94339	0.53039	1.94919	1.22071	1.96	0.933581	2.40094	1.79351	2.76662	1.75878	0.562693	1.08322	0.793426	1.02925	0.667374	0.845783	0	0	0	0	0	0	0	0	0	0	0	0	0	0	0	0	0	0	0	0	0	0	0
FBtr0071627	0.0749679	1	1	5.73829	0.120834	0.0382421	0.0420307	0.0144305	0.0137977	0.0236354	0.0053927	0.0158054	0.164001	27.0111	0.31823	0.277052	13.0697	0.0885523	0.319188	4.55307	2.69125	2.16558	1.85953	2.00907	1.4913	1.60952	0	0	0	0	0	0	0	0	0	0	0	0	0	0	0	0	0	0	0	0	0	0	0
FBtr0071628	0.760376	0.959371	0.999779	0.818985	1.49419	2.0059	1.33557	1.41873	0.85205	0.710543	0.644457	0.732189	0.812076	0.63233	1.27482	1.05469	1.52757	1.7313	1.4132	1.28229	0.299671	0.410084	0.330297	0.461702	0.28783	0.411569	0	0	0	0	0	0	0	0	0	0	0	0	0	0	0	0	0	0	0	0	0	0	0
FBtr0071635	1	1	0.142436	1	0.0453277	0.0542823	0.154606	0.84352	0.263289	0.272385	0.171728	0.34807	0.308983	1	0.350888	0.690497	24.2925	0.0446607	0.0423505	3.30573	2.83871	1.10087	1.18732	0.701824	1.32789	0.625063	0	0	0	0	0	0	0	0	0	0	0	0	0	0	0	0	0	0	0	0	0	0	0
FBtr0071636	0.908711	0.842321	0.571953	0.968324	0.751086	0.564632	0.543431	0.285545	0.439916	0.43948	0.54051	0.546234	0.219367	0.611579	0.485616	0.526887	0.445683	0.467145	0.399366	0.447459	0.358221	0.351168	0.274163	0.418081	0.245348	0.457216	12	9	9	12	12	10	10	12	10	10	8	12	9	9	8	11	10	9	8	11	12	10	10
FBtr0071637	0.125891	0.339457	0.23997	0.320056	0.517151	0.396332	0.539968	0.46181	0.162467	0.188727	0.302941	0.268928	0.0944585	0.189931	0.157248	0.117621	0.265414	0.253037	0.255537	0.191186	0.57661	0.391793	0.561726	0.290224	0.576602	0.168045	3	4	3	4	4	5	4	5	4	3	3	4	4	5	4	5	4	3	3	4	4	3	3
FBtr0071639	0.518517	0.0527073	1.1486	0.0253842	1.2057	0.0460697	0.821886	0.0106646	4.56829	0.0871684	1.59092	0.97138	0.96182	13.4333	1.48733	17.621	1.02912	0.00594255	1.01547	0.00828458	0.796701	2.03473	0.900442	1.90721	0.344996	0.571719	0	0	0	0	0	0	0	0	0	0	0	0	0	0	0	0	0	0	0	0	0	0	0
FBtr0071640	0.0653097	0.0761488	0.26532	2.71583	0.586828	0.540786	0.556944	1	0.822096	1	0.369164	0.351776	0.593005	1	0.537822	0.0909614	0.533654	3.23032	0.499266	0.0542308	0.427699	1.10509	0.601482	0.991498	0.675066	1.06345	2	0	0	2	1	0	0	1	1	0	0	1	1	0	0	1	3	0	0	3	3	0	0
FBtr0071641	0.327356	0.355518	0.645248	0.902282	0.871439	1.09828	0.848517	0.795477	0.902305	0.78985	0.414745	0.848758	0.591892	1.08096	0.940035	0.875316	0.789405	0.862615	0.640852	0.81194	0.300995	0.240924	0.372341	0.30655	0.374279	0.398967	1	2	1	2	1	2	1	2	1	2	1	2	1	2	1	2	1	2	1	2	1	2	1
FBtr0071654	0.514198	2.53135	0.66837	1.25388	1.6514	1.45149	1.35892	1.09279	0.720959	0.999469	1.109	0.840797	1.70563	1.98769	1.59423	0.835442	1.51621	1.3321	1.85628	1.40329	0.381686	0.386423	0.443011	0.448249	0.519562	0.410415	5	9	5	9	6	8	6	8	6	8	6	8	6	8	6	8	6	8	5	9	6	8	6
FBtr0071658	1.38746	0.221264	0.492576	0.149151	1.05448	0.131541	0.8202	0.215979	0.903739	0.119049	0.655699	0.122136	0.664682	0.24739	1.12126	0.23055	0.915571	0.117497	0.873862	0.157369	0.289865	0.302275	0.354283	0.292418	0.40232	0.255239	0	0	0	0	0	0	0	0	0	0	0	0	0	0	0	0	0	0	0	0	0	0	0
FBtr0071659	0.253159	1.04548	0.201046	0.900701	0.299481	0.596031	1.00852	1.72555	1.30715	1.598	0.394663	0.0767079	1.36138	0.588628	0.66488	0.458146	1.87786	0.0979714	0.257792	3.42881	0.775595	0.954126	0.803438	0.624219	0.864313	0.447412	2	0	0	2	0	0	0	0	1	2	1	2	2	2	2	2	0	0	0	0	0	1	0
FBtr0071661	0.802781	0.925304	0.305845	0.437538	0.354383	0.303601	0.417487	0.545247	0.270846	0.337329	0.158508	0.225305	0.755823	0.774717	0.519173	0.41441	0.203948	0.258325	0.199763	0.222996	0.57161	0.537889	0.57749	0.546126	0.481644	0.483267	4	4	4	4	4	4	4	4	1	4	1	4	4	4	4	4	4	3	3	4	4	2	2
FBtr0071663	1.04705	1.37765	1.2377	0.926961	0.980402	1.4215	1.04046	1.34788	0.685299	0.920426	0.465695	0.644777	2.3788	0.959017	1.11405	1.05179	1.07476	1.10192	1.14409	0.872139	0.447615	0.237149	0.309466	0.288925	0.103707	0.181072	0	1	0	2	2	1	1	2	0	1	0	2	2	1	1	2	2	0	0	2	2	0	0
FBtr0071666	0.78922	0.433946	0.818981	0.724601	1.08144	1.05227	0.887175	0.612102	0.595329	0.428002	0.494838	0.459909	0.499845	0.425154	0.473432	0.708978	0.65742	0.653339	0.605058	0.615114	0.288518	0.31851	0.269276	0.392711	0.14693	0.368666	0	0	0	0	0	0	0	0	0	0	0	0	0	0	0	0	0	0	0	0	0	0	0
FBtr0071668	0.212384	0.023655	0.11763	0.0369672	0.567236	0.0461783	1	1	0.312886	0.345298	0.171693	0.096696	0.254171	0.07085	0.377634	0.354006	0.0412988	0.0379355	0.0662845	0.842661	0.923144	1.25772	0.844967	1.48313	0.844038	1.743	0	0	0	0	0	0	0	0	0	0	0	0	0	0	0	0	0	0	0	0	0	0	0
FBtr0071670	1.02769	0.967574	1.02517	0.995313	1.03701	1.17234	0.805605	0.690268	0.432676	0.40067	0.420189	0.518129	0.565568	0.430703	0.39905	0.479433	0.749127	0.581307	0.679331	0.531952	0.360672	0.400981	0.373772	0.381633	0.115304	0.208333	0	0	0	0	0	0	0	0	0	0	0	0	0	0	0	0	0	0	0	0	0	0	0
FBtr0071671	0.025838	1	0.390819	0.0654599	0.283448	0.19227	0.62091	0.479613	0.0732545	0.1682	0.081448	0.0106521	1.84281	0.973143	0.468244	0.577612	0.679348	0.552681	0.463974	0.414582	1.06747	0.785347	0.941871	1.16127	0.747873	0.955497	0	0	0	0	1	0	0	1	1	2	1	2	1	2	1	2	0	1	0	1	1	0	0
FBtr0071672	0.396783	0.403079	0.550223	0.284108	0.244448	0.225042	0.251554	0.305127	0.262139	0.201327	0.19249	0.122019	0.198775	0.118443	0.281049	0.16373	0.344371	0.281318	0.221529	0.194676	0.373576	0.388404	0.4214	0.376485	0.400575	0.243294	1	1	1	1	1	1	1	1	0	1	0	1	1	1	1	1	1	1	1	1	1	1	1
FBtr0071673	0.609597	8.12399	1.66566	1.8073	2.51495	2.48033	1.66525	2.46775	1.21289	1.74292	1.6239	1.21927	5.86644	2.2838	2.94657	1.84755	2.97482	2.74297	2.86079	2.00825	0.609555	0.735808	0.404399	0.863669	0.483395	0.793818	0	0	0	0	0	0	0	0	0	0	0	0	0	0	0	0	0	0	0	0	0	0	0
FBtr0071675	0.0818215	1.80192	0.24093	0.422118	0.378518	0.875887	0.624591	0.783721	0.670464	0.587355	0.382582	1.13132	0.803884	0.543743	0.755115	0.424115	0.834155	0.541763	0.645301	0.521619	0.471783	0.560122	0.564902	0.524753	0.693791	0.605204	0	0	0	0	0	0	0	0	0	0	0	0	0	0	0	0	0	0	0	0	0	0	0
FBtr0071676	0.485246	0.34049	1.28727	0.740608	1.17397	1.46542	0.971596	1.3568	0.38547	0.434234	0.343256	0.336322	0.441076	0.268706	0.521639	0.498865	0.859418	0.985062	1.14144	0.761396	0.479303	0.597313	0.542413	0.657998	0.361855	0.54349	0	0	0	0	0	0	0	0	0	0	0	0	0	0	0	0	0	0	0	0	0	0	0
FBtr0071678	0.1485	0.437644	0.297676	0.0918582	0.22032	1.02813	2.96589	3.70113	4.30474	4.99727	2.31067	0.4165	1.81063	1.08051	2.06869	1.29253	4.02551	2.699	2.75402	2.28872	0.721258	0.88537	1.02495	1.15537	1.51219	1.24535	0	0	0	0	0	0	0	0	0	0	0	0	0	0	0	0	0	0	0	0	0	0	0
FBtr0071679	3.10416	2.29484	1.75688	1.6335	1.96799	1.65333	1.46013	1.59811	1.4637	1.16291	1.35481	0.975449	1.10764	0.918082	1.67531	1.21097	1.32578	1.27931	1.1507	0.951389	0.354653	0.314797	0.353546	0.295726	0.346844	0.186103	1	1	1	1	1	1	1	1	1	1	1	1	1	1	1	1	1	1	1	1	1	1	1
FBtr0071680	0.0660271	0.0892549	0.167958	0.260372	0.18211	0.192458	0.151524	0.117368	0.0807156	0.173886	0.090096	0.169645	0.0982418	0.198481	0.0989176	0.107815	0.152133	0.216502	0.114977	0.185274	0.333472	0.30826	0.405378	0.358214	0.367192	0.467957	0	0	0	0	0	0	0	0	0	0	0	0	0	0	0	0	0	0	0	0	0	0	0
FBtr0071682	1.32299	0.0928943	1.29889	56.2415	1.18007	0.835714	0.981906	0.300173	0.809796	0.32163	0.420093	2.2328	1.05081	0.852665	0.666742	0.694458	0.76819	0.293851	0.189038	0.465595	0.429261	2.82066	0.345287	2.26556	0.130255	1.94311	1	0	0	1	0	0	0	0	0	1	0	1	1	1	1	1	1	1	1	1	1	1	1
FBtr0071683	0.666239	0.768125	1.29772	1.16256	1.23723	1.02604	1.13539	1.0841	0.821399	0.93878	0.949277	0.691953	1.05649	0.698445	0.562005	0.748728	1.25341	1.12189	1.33496	1.07614	0.264672	0.200684	0.243517	0.194266	0.264304	0.169081	1	0	0	1	1	0	0	1	1	0	0	1	1	0	0	1	1	0	0	1	1	0	0
FBtr0071684	0.342808	3.28591	0.205013	0.067873	0.306669	1	1	4.09352	0.0368686	0.0460304	0.0388892	0.0292657	0.144032	0.126366	0.111511	0.0619238	0.142854	1	1	4.48656	1.09793	1.27637	1.10817	1.27719	0.781481	0.895093	0	0	0	0	0	0	0	0	0	0	0	0	0	0	0	0	0	0	0	0	0	0	0
FBtr0071686	0.542079	0.334742	0.274942	0.161003	0.223073	0.262069	0.256078	0.182174	0.101873	0.156573	0.208741	0.135528	0.107736	0.294076	0.236654	0.150178	0.148754	0.125109	0.147024	0.129863	0.565299	0.390832	0.549918	0.375432	0.453426	0.338183	3	4	3	4	3	3	3	3	2	2	2	2	3	3	3	3	2	2	2	2	3	3	3
FBtr0071687	0.640176	0.143856	1.11592	0.7181	0.24967	1.28825	0.653833	1.63897	0.852309	1.06896	0.569141	0.759081	0.92629	1.09397	1.12172	0.940378	1.36195	1.38665	1.24629	1.25558	0.397511	0.407702	0.425832	0.553417	0.532849	0.692954	0	0	0	0	0	0	0	0	0	0	0	0	0	0	0	0	0	0	0	0	0	0	0
FBtr0071688	0.02791	0.0388367	0.682805	0.413222	0.930844	0.74813	1.12601	0.449277	0.178644	0.439596	0.353373	0.618562	0.136881	0.325856	0.0963147	0.25858	0.732828	0.794841	0.998233	0.724105	0.788104	0.501659	0.789957	0.531648	0.691393	0.705102	0	0	0	0	1	2	1	2	3	1	1	3	1	3	1	3	2	2	2	2	2	3	2
FBtr0071690	0.61985	7.87559	1.30705	0.35982	1.37144	1.65692	1.59402	1.29521	2.11634	3.36663	0.397555	3.43053	3.37128	1.50345	1.52485	0.988051	1.8485	1.74713	1.93647	1.44278	0.512947	0.913261	0.513544	0.892346	0.343829	1.22623	0	0	0	0	0	0	0	0	0	0	0	0	0	0	0	0	0	0	0	0	0	0	0
FBtr0071695	0.22	1	0.375312	1	0.557181	1	0.121002	0.852321	1.20866	0.435573	0.295494	0.986141	1.08284	0.671477	3.58618	1.18038	0.732234	2.76077	1.86206	6.53325	1.05069	1.11333	0.851328	0.255777	0.598444	0.0766699	0	0	0	0	0	0	0	0	0	0	0	0	0	0	0	0	0	0	0	0	0	0	0
FBtr0071697	0.659538	11.4322	2.17245	1.61351	2.52966	3.14636	1.96284	2.93366	5.38094	2.54116	1.4957	0.529253	1.59291	1.25625	1.56137	1.28445	1.78618	3.45094	8.37718	2.55299	0.849744	1.0038	0.680898	1.05687	0.445277	0.938084	0	0	0	0	0	0	0	0	0	0	0	0	0	0	0	0	0	0	0	0	0	0	0
FBtr0071700	0.210693	0.417699	0.68898	0.966692	1.19416	1.17534	0.827446	1.40516	0.543973	0.78408	0.516868	0.341815	0.239332	0.638118	0.8371	0.386471	0.653556	0.830272	0.747233	0.651736	0.451073	0.459142	0.499706	0.493644	0.55693	0.425945	0	2	0	2	1	2	1	2	0	1	0	1	0	0	0	0	0	0	0	0	0	0	0
FBtr0071701	1.78239	1.72881	1.05794	1.015	1.26919	0.673309	0.741359	0.484034	0.924897	0.581228	0.919989	0.458129	0.721215	0.652235	0.690298	0.431338	1.1351	0.767637	1.18316	0.74406	0.315579	0.510108	0.331966	0.591537	0.360643	0.562192	0	2	0	2	0	2	0	2	0	2	0	2	0	1	0	1	0	0	0	0	0	2	0
FBtr0071708	1.72246	1.72557	1.47918	1.64963	1.83948	2.41758	1.19882	1.35857	0.945639	1.2852	1.24655	1.12626	2.25362	1.48054	0.797752	0.560244	1.85767	1.46749	1.20318	1.6016	0.314558	0.3217	0.241027	0.290012	0.181872	0.250938	0	0	0	0	0	0	0	0	0	0	0	0	0	0	0	0	0	0	0	0	0	0	0
FBtr0071710	0.116322	0.128059	1.01698	1	0.143417	1	0.764268	1	0.0585433	0.00906155	0.00148614	0.00155403	0.266406	0.0546229	0.199531	0.267199	1	1	0.0941731	1.59595	1.09072	0.948482	1.2251	1.00233	0.884498	0.557496	0	0	0	0	0	0	0	0	0	0	0	0	0	0	0	0	0	0	0	0	0	0	0
FBtr0071713	1.09587	1	1.1864	206.9	1.63416	0.46807	0.58347	1	1.25918	1	1.81544	1	0.987232	1	0.878226	1	1.0792	1	1.18417	1	0.300988	3.02413	0.343191	2.38736	0.383064	1.96857	1	0	0	1	1	1	1	1	1	1	1	1	0	0	0	0	0	0	0	0	1	0	0
FBtr0071714	0.14705	1	0.0537663	1	0.028407	1	0.0516335	1	0.0929035	0.13182	0.0441411	0.0349535	0.307355	26.478	0.221416	0.274081	0.0522074	1	0.598496	43.0673	1.11952	1.98733	0.62451	0.683014	0.747649	0	0	0	0	0	0	0	0	0	0	0	0	0	0	0	0	0	0	0	0	0	0	0	0
FBtr0071716	2.76314	1.14003	1.64692	1.04559	1.03427	0.988464	1.77916	1.05161	4.20698	0.916076	1.09679	0.516088	2.20496	0.781388	1.39035	1.22793	1.1059	0.582978	1.65901	0.66966	0.516968	0.272517	0.57986	0.235314	0.396451	0.0592401	0	0	0	0	0	0	0	0	0	0	0	0	0	0	0	0	0	0	0	0	0	0	0
FBtr0071720	3.01137	0.153501	0.629283	0.0670126	0.730036	1	0.141089	0.847105	0.17565	16.006	0.689071	0.276186	1	1	0.185713	0.0396399	1	4.82154	1	2.13957	0.971416	1.8652	1.19206	2.07777	1.1363	0.918934	0	0	0	0	0	0	0	0	0	0	0	0	0	0	0	0	0	0	0	0	0	0	0
FBtr0071726	0.477179	0.612752	0.640497	0.614251	0.800007	0.522954	0.860693	0.420636	0.563691	0.436857	0.429905	1.00164	0.367907	0.686942	0.575349	0.76917	0.71793	0.888621	0.701001	0.729343	0.261582	0.280349	0.275523	0.35375	0.247828	0.169287	0	0	0	0	0	0	0	0	0	0	0	0	0	0	0	0	0	0	0	0	0	0	0
FBtr0071727	0.233294	0.170685	1	0.0753766	0.114267	3.26202	0.22377	3.76314	0.332705	1	1.12851	1	1	1	0.861133	0.157818	0.0608679	1	0.0741652	0.151803	0.870278	1.13221	0.871031	1.0237	1.03954	1.08263	0	0	0	0	0	0	0	0	0	0	0	0	0	0	0	0	0	0	0	0	0	0	0
FBtr0071728	0.162833	1	0.22389	1	1.02376	1	0.0843641	0.0676826	0.32344	1	0.101737	1	0.138814	0.134391	0.651023	1	0.859594	0.65395	1.13917	1	0.869735	0.479778	1.11136	0.45064	1.16965	0.607832	0	0	0	0	0	0	0	0	0	0	0	0	0	0	0	0	0	0	0	0	0	0	0
FBtr0071731	0.284201	0.13708	0.48299	1	0.54397	0.136977	0.120111	0.171755	0.775401	0.821961	0.19162	0.387255	0.100661	0.111104	0.651523	0.800331	0.0610063	0.644358	0.178359	0.437443	0.751067	0.714034	0.616585	0.856233	0.540581	1.17861	0	0	0	0	0	0	0	0	0	0	0	0	0	0	0	0	0	1	0	1	1	0	0
FBtr0071732	0.231558	0.175467	0.373393	0.0777388	1	0.175341	0.15829	0.460678	0.197998	1	0.0855739	1	1	0.143426	0.116705	0.16231	3.16409	0.147611	0.342311	0.626476	1.40982	0.906725	0.986605	0.87543	0.86962	0.744241	0	0	0	0	0	0	0	0	0	0	0	0	0	0	0	0	0	0	0	0	0	0	0
FBtr0071733	1	1	1	1	1	1	1	1	0.036723	1	0.0962908	0.0171601	0.478473	1	0.373091	0.318503	1	1	0.0448343	1	0.730381	0.429468	0.700344	0.479844	0	0	0	0	0	0	0	0	0	0	0	0	0	0	0	0	0	0	0	0	0	0	0	0	0
FBtr0071734	0.323819	1	0.321349	1	3.55005	0.291293	0.312103	1	0.10331	0.0307079	0.0943898	0.0598232	0.285732	1	0.225117	0.202228	1	1	0.0592995	0.84706	1.69034	0.678151	1.73342	0.863085	1.43366	0.430656	0	0	0	0	0	0	0	0	0	0	0	0	0	0	0	0	1	0	0	1	0	1	0
FBtr0071735	0.0692761	1	1.33802	0.10833	0.649398	0.092684	0.628975	2.85409	2.261	0.39128	0.453869	0.299776	0.196551	1	0.719767	0.518551	0.34005	1	1	2.41055	0.841908	0.982201	0.870499	1.34441	0.773534	1.28046	0	0	0	0	0	0	0	0	0	0	0	0	0	0	0	0	0	0	0	0	0	0	0
FBtr0071738	0.226743	1	0.882624	1	0.142193	1	0.0442523	1	0.0741426	1	0.185444	0.0636319	3.79491	1	2.43553	0.49527	1	1	1	0.622463	1.25845	0.395717	1.20672	0.45296	1.17251	0	0	0	0	0	0	0	0	0	0	0	0	0	0	0	0	0	0	0	0	0	0	0	0
FBtr0071739	0.259849	4.57963	1.12445	0.351197	0.444876	5.67722	2.51205	3.33728	2.71391	3.03877	0.830964	1.27905	1.98823	0.735851	1.46146	1.10059	2.32128	0.456422	2.05145	3.88187	0.557643	0.779319	0.800209	0.652847	0.94095	0.659232	0	0	0	0	0	0	0	0	0	0	0	0	0	0	0	0	0	0	0	0	0	0	0
FBtr0071740	0.72454	2.38191	0.971026	0.287216	0.162874	3.20318	2.52852	5.50498	2.21526	2.45315	0.0541067	1.63199	2.1454	0.992618	1.58279	1.48075	1.85035	0.10309	173.022	49.4868	2.9306	2.23568	0.937943	0.675558	0.923336	0.758422	0	0	0	0	0	0	0	0	0	0	0	0	0	0	0	0	0	0	0	0	0	0	0
FBtr0071743	0.499577	12.0106	1.47173	0.534568	1.39973	1.44748	1.44919	1.59013	0.932109	0.755348	1.34535	1.00462	0.927567	0.638043	0.187897	0.148027	1	1	1.14025	7.71756	0.411086	1.46734	0.329048	1.55196	0.391085	1.39388	0	0	0	0	0	0	0	0	0	0	0	0	0	0	0	0	0	0	0	0	0	0	0
FBtr0071744	0.0466149	1	0.0557912	1	0.535416	2.00168	0.231167	1.22508	0.492719	0.482135	1.57553	0.110425	0.229075	1	1	0.142712	0.0791221	1	13.2946	1	2.32838	0.615755	1.16725	0.669485	1.0517	0.36376	0	0	0	0	0	0	0	0	0	0	0	0	0	0	0	0	0	0	0	0	0	0	0
FBtr0071745	2.38675	1	0.157178	3.19467	0.297044	0.934516	0.508853	0.407521	0.11002	0.150052	0.226529	0.175577	0.827399	0.207458	0.329059	0.121883	0.887976	0.960535	1.23614	0.826365	1.00217	1.15147	1.43137	1.17329	1.24535	0.892798	0	0	0	0	0	0	0	0	0	0	0	0	0	0	0	0	0	0	0	0	0	0	0
FBtr0071746	2.72357	2.58628	2.4559	1.47011	1.50493	0.992244	1.23068	1.19554	1.02318	0.918719	0.89862	0.998248	1.32676	1.07484	0.760809	0.763165	1.84124	1.78081	1.58482	1.41248	0.421078	0.407772	0.468965	0.465413	0.365188	0.455455	0	0	0	0	0	0	0	0	0	0	0	0	0	0	0	0	0	0	0	0	0	0	0
FBtr0071749	0.231123	1	1	1	0.203119	1	1.07963	0.070708	0.17996	0.0834039	0.0648548	0.130477	0.909337	1	0.187468	0.198612	0.0876265	0.0776162	1.14877	13.3966	0.900815	2.28323	0.986418	0.906349	0.757765	0.605262	0	0	0	0	0	0	0	0	0	0	0	0	0	0	0	0	0	0	0	0	0	0	0
FBtr0071755	0.133263	0.106844	0.452294	0.271742	0.92417	0.855322	0.787869	0.334992	0.330704	0.555386	0.398373	0.695977	0.230884	0.407587	0.281533	0.370474	0.480428	0.612508	0.398467	0.561957	0.552131	0.462362	0.587018	0.598906	0.617502	0.824435	0	0	0	0	1	2	1	2	0	2	0	2	0	1	0	1	2	2	1	3	1	1	0
FBtr0071756	0.159121	0.0701171	0.299578	0.544461	0.750967	0.691966	0.858902	0.880125	0.656343	0.5439	0.46317	0.415118	0.939233	1.08748	0.519853	0.498172	0.685039	0.820168	0.64253	0.751633	0.404943	0.448233	0.510623	0.521461	0.657637	0.633157	1	0	0	1	1	1	1	1	1	0	0	1	1	1	1	1	1	1	1	1	1	1	1
FBtr0071758	0.0282569	0.0275116	0.197094	0.33873	0.691093	0.697343	0.533643	0.694582	0.345111	0.36075	0.240181	0.329015	0.360064	0.41565	0.563756	0.532919	0.598973	0.69602	0.455672	0.524257	0.513003	0.460733	0.707922	0.623828	0.837198	0.733037	0	0	0	0	0	2	0	2	2	2	2	2	2	2	2	2	2	2	2	2	2	0	0
FBtr0071760	0.30083	1	0.175405	1	0.267316	0.0709465	0.789404	4.72031	0.105149	1	0.05274	0.553945	2.79287	0.566061	2.36019	0.996064	3.08941	3.80235	1.40272	1.65466	1.05456	0.982181	0.943171	1.20248	0.719968	1.21453	0	0	0	0	0	0	0	0	0	0	0	0	0	0	0	0	0	0	0	0	0	0	0
FBtr0071761	1.16955	0.721905	1.33147	0.967218	0.953847	0.439897	0.222669	0.114653	0.357393	0.206971	0.128779	0.124061	0.257021	0.385156	0.122553	0.185464	0.505255	0.320125	0.351535	0.677713	0.825451	0.696508	0.750153	0.818412	0.532482	0.654873	2	2	2	2	2	2	2	2	0	2	0	2	2	0	0	2	2	2	2	2	2	0	0
FBtr0071762	0.326327	2.69524	0.469385	0.794764	1.37023	1.46464	1.36946	1.9698	2.56197	0.67827	2.63557	1.31308	2.89382	1.08308	1.14882	1.08096	2.27604	2.95204	5.67884	9.50839	0.749687	1.11638	0.678686	0.508692	0.638355	0.463845	0	0	0	0	0	0	0	0	0	0	0	0	0	0	0	0	0	0	0	0	0	0	0
FBtr0071763	0.519117	0.28412	0.802968	0.531308	0.549958	0.712794	0.618096	0.442419	0.474098	0.175768	0.348903	0.270754	0.508831	0.586334	0.316812	0.427726	0.358873	0.427516	0.331165	0.510197	0.317257	0.367549	0.275548	0.493019	0.204324	0.363036	4	3	3	4	4	3	3	4	4	3	3	4	4	3	3	4	4	2	2	4	4	2	2
FBtr0071765	0.137291	1	1	1	0.54824	0.052045	1	1	0.00498965	0.0974306	0.167389	0.0234355	0.0808161	0.0414441	0.144359	0.0900137	1	14.3819	0.204533	0.0456045	0.976691	2.51101	0.932388	0.97707	0.61796	0.621193	0	0	0	0	0	0	0	0	0	0	0	0	0	0	0	0	0	0	0	0	0	0	0
FBtr0071766	0.0827197	0.0731546	0.876191	0.0588466	0.492848	0.32777	0.47788	0.0751257	0.41233	0.520845	0.268907	0.338219	0.57909	1.99503	0.331138	0.593504	0.235875	0.614875	0.056027	9.92233	0.641226	2.08632	0.609781	0.82505	0.671647	0.968913	0	0	0	0	0	0	0	0	0	0	0	0	0	0	0	0	0	0	0	0	0	0	0
FBtr0071767	0.125457	0.135094	0.46228	0.696235	0.956103	0.918325	0.703878	0.461099	0.362224	0.375131	0.295211	0.341107	0.417019	0.517699	0.226009	0.318143	0.550923	0.504031	0.554272	0.411963	0.520362	0.461624	0.620086	0.571124	0.629983	0.606484	0	1	0	1	0	1	0	1	0	0	0	0	0	0	0	0	0	0	0	0	0	0	0
FBtr0071769	0.296994	1.25004	0.521383	0.639937	0.851124	1.19041	0.808106	0.944229	0.289042	0.30386	0.491656	0.183602	0.66078	0.743889	0.537349	0.61062	0.683022	0.679985	0.585257	0.604206	0.329356	0.477004	0.446025	0.598737	0.419821	0.276018	0	0	0	0	0	0	0	0	0	0	0	0	0	0	0	0	0	0	0	0	0	0	0
FBtr0071770	0.843245	0.580349	0.648175	0.905357	1.29542	1.16836	1.0389	1.19722	0.584047	0.655922	1.10813	0.613128	0.537508	1.32539	0.913301	0.661761	1.07397	0.798304	0.884475	0.917567	0.276154	0.304505	0.30099	0.327851	0.289213	0.297883	0	0	0	0	0	0	0	0	0	0	0	0	0	0	0	0	0	0	0	0	0	0	0
FBtr0071771	1.47538	1.25522	1.13143	1.30172	1.23703	0.966554	1.10227	1.08455	1.12322	1.06308	1.14293	1.11994	1.0414	1.29878	1.12969	0.684941	1.46912	1.09693	1.31987	1.22959	0.126839	0.167761	0.117994	0.110709	0.137021	0.134486	0	2	0	2	0	2	0	2	0	2	0	2	0	2	0	2	0	2	0	2	0	2	0
FBtr0071773	0.185441	3.53378	1	0.0616426	0.161807	0.0765134	0.0580471	1	0.00244818	0.0365395	0.00498036	0.0146899	0.424778	0.822225	0.208344	0.23909	0.490787	1	0.0565453	2.56156	1.19165	1.28885	1.62431	1.77672	1.24095	1.40166	0	0	0	0	0	0	0	0	0	0	0	0	0	0	0	0	0	0	0	0	0	0	0
FBtr0071774	1.40397	0.798202	0.47638	0.363284	0.677301	0.678004	0.64306	0.174816	0.223529	0.260378	0.279509	0.33139	0.333242	0.438903	0.214655	0.247116	0.332813	0.288795	0.310357	0.242593	0.735569	0.531031	0.691914	0.568658	0.514865	0.567481	4	3	3	4	4	3	3	4	3	4	3	4	3	2	2	3	3	2	2	3	4	3	3
FBtr0071775	0.25294	1.1763	0.190736	0.480958	0.668361	0.987654	1.11329	0.692583	0.622376	0.828423	0.541944	0.482864	2.685	1.96525	0.853865	1.05388	0.696916	0.357496	0.529496	0.4847	0.869174	0.56531	0.588453	0.359405	0.768562	0.369674	3	4	2	5	4	4	4	4	5	5	5	5	5	4	4	5	4	4	3	5	5	5	5
FBtr0071777	0.230801	4.46842	0.216399	1.04904	1.53818	1.62599	0.876842	0.503507	2.03931	1.62298	1.34758	4.13873	0.94381	1.06674	1.11218	0.920642	0.870282	0.450125	0.796698	0.669042	0.557864	0.881815	0.705702	0.742381	0.879017	0.92324	2	5	2	5	2	5	2	5	3	6	3	6	3	5	3	5	2	4	2	4	2	4	2
FBtr0071779	0.179054	4.63821	0.318752	1.72805	1.75738	2.01946	1.5033	1.68675	2.09055	6.6678	2.19208	1.32631	1.69404	1.33286	1.82896	1.28282	1.98755	0.221451	3.18371	13.9746	0.52515	1.18889	0.657386	0.716007	0.858122	0.564362	0	0	0	0	0	0	0	0	0	0	0	0	0	0	0	0	0	0	0	0	0	0	0
FBtr0071780	1	1	0.0744376	0.0510713	0.256425	0.0635646	0.113816	0.0476102	0.0164357	0.0130115	0.0133833	0.0178417	0.371641	0.311568	0.398447	0.383482	0.114997	0.0995618	0.0967123	9.07792	1.21441	2.54586	1.54665	1.97625	1.19889	1.62791	0	0	0	0	0	0	0	0	0	0	0	0	0	0	0	0	0	0	0	0	0	0	0
FBtr0071781	0.282346	14.4475	4.25573	0.531539	0.142958	13.2268	1.34075	2.45335	2.59192	3.36878	2.53262	0.420585	1.26128	0.781858	1.84621	0.393518	0.206577	0.116579	0.171604	0.418429	0.933835	1.51956	0.848884	1.11177	1.26868	0.937738	0	0	0	0	0	0	0	0	0	0	0	0	0	0	0	0	0	0	0	0	0	0	0
FBtr0071782	1	0.119236	0.43987	1	0.639239	0.119144	0.273375	0.090589	2.48501	0.526267	1.13764	0.596233	1.04591	2.1949	1.0342	1.24017	0.319737	0.255517	2.09263	48.9732	0.700145	2.77329	0.802822	0.894232	0.531654	1.34052	0	0	0	0	0	0	0	0	0	0	0	0	0	0	0	0	0	0	0	0	0	0	0
FBtr0071783	0.0742107	0.305671	0.786809	0.264186	0.718581	6.0487	0.563965	1.8495	1.73836	8.5972	0.95992	11.2602	1.09337	0.619118	1.14476	0.154275	0.203893	0.182997	6.49942	12.6429	1.35072	1.19365	0.677623	0.980596	0.600114	1.28623	0	0	0	0	0	0	0	0	0	0	0	0	0	0	0	0	0	0	0	0	0	0	0
FBtr0071784	0.816325	4.04638	0.326111	0.330766	0.518962	1.18946	1.16259	1.1772	0.736274	0.864065	0.524959	2.03554	1.74369	0.932903	0.83519	0.533516	0.771714	0.873468	1.39663	0.84606	0.491233	0.835788	0.430633	0.819495	0.517172	0.963338	1	0	0	1	1	0	0	1	0	0	0	1	1	0	0	1	1	0	0	1	1	0	0
FBtr0071786	0.878085	0.214544	0.743956	0.314775	0.765586	0.614188	0.490501	0.283421	0.240579	0.143319	0.332462	0.132676	0.241411	0.180832	0.366111	0.283709	0.442888	0.45077	0.369604	0.388911	0.470056	0.500845	0.449696	0.625304	0.227394	0.495243	0	1	0	1	0	2	0	2	0	2	0	2	0	0	0	0	0	2	0	2	0	2	0
FBtr0071787	0.814679	0.586421	1.62525	1.33232	0.694169	0.817747	0.505483	1.06561	1.15578	0.921389	0.72127	0.766834	0.420754	0.747688	0.533461	0.750116	1.69334	1.62747	1.03143	1.10578	0.491108	0.325797	0.442163	0.283401	0.542467	0.337757	1	3	1	3	1	3	1	3	1	3	1	3	0	3	0	3	0	2	0	2	1	0	0
FBtr0071790	0.782664	0.610405	1.04843	0.663626	0.98641	0.720543	0.807742	0.56767	0.896012	0.559295	0.837574	0.611174	0.725826	0.690999	0.755068	0.662519	0.910533	0.716221	0.872174	0.766575	0.118312	0.104707	0.117863	0.0979825	0.14473	0.103363	0	0	0	0	0	0	0	0	0	0	0	0	0	0	0	0	0	0	0	0	0	0	0
FBtr0071797	0.429365	6.11081	0.693831	0.204654	1.61667	0.784521	1.52513	1.20519	1.48401	2.3722	0.725608	6.40048	3.69491	1.44905	2.06477	0.896639	1.38104	1.13493	1.23247	1.24049	0.620139	1.01726	0.481065	0.961348	0.55692	1.3104	0	0	0	0	0	0	0	0	0	1	0	1	1	1	1	1	1	1	1	1	1	1	1
FBtr0071799	1.02879	1	0.0907452	0.0777388	0.31442	0.567378	0.598102	0.585442	0.175012	0.401801	0.116959	0.364531	0.402231	1.18994	0.112643	0.0373061	0.775439	0.60808	0.425806	0.687634	0.77938	0.655455	0.943196	0.612608	0.79628	0.676435	0	0	0	0	0	0	0	0	0	0	0	0	0	0	0	0	0	0	0	0	0	0	0
FBtr0071800	0.353689	0.185159	0.716505	0.365958	0.435062	0.617875	0.481459	0.381176	0.25587	0.157943	0.153008	0.0949785	0.513797	0.335909	0.179982	0.115245	0.659224	0.515968	0.408391	0.439887	0.45227	0.553966	0.490748	0.644194	0.313634	0.458014	1	1	1	1	1	1	1	1	1	1	1	1	1	1	1	1	1	1	1	1	1	1	1
FBtr0071802	2.18458	0.888948	1.35736	0.560803	0.895916	1.2999	1.37826	1.55938	1.07192	0.55678	0.450882	0.563929	1.10636	0.738709	0.883013	0.703753	1.77811	1.60961	1.99284	1.26786	0.414025	0.430812	0.4757	0.479248	0.368287	0.409637	0	0	0	0	0	0	0	0	0	0	0	0	0	0	0	0	0	0	0	0	0	0	0
FBtr0071803	0.0084921	0.0382741	0.0495329	0.0451549	0.0296718	0.0562868	0.0590726	0.149444	0.0248312	0.00469747	0.00988922	0.00801069	0.0326097	1.20867	0.174932	0.192004	0.00454013	0.0374085	0.0164714	0.566359	1.22622	1.65871	0.68078	1.04815	0.611498	0.71889	0	0	0	0	0	0	0	0	0	0	0	0	0	0	0	0	0	0	0	0	0	0	0
FBtr0071804	0.359272	0.0945355	0.37624	1	0.340926	0.942331	2.46197	0.339221	0.0507665	0.106921	0.12787	0.0981273	0.169361	1.20491	0.316706	0.286761	3.13796	0.242374	0.138377	0.907794	1.4692	0.837481	1.47313	0.998575	1.18887	0.753201	0	0	0	0	0	0	0	0	0	0	0	0	0	0	0	0	0	0	0	0	0	0	0
FBtr0071805	0.229814	1	0.371096	1	0.144333	1	0.289585	1	1.43831	1	0.084808	0.0939825	0.0990196	1	0.0613996	1	0.0597593	0.141063	0.0805256	0.0552658	1.46458	0.599112	1.1871	0.435667	0.370089	0	0	0	0	0	0	0	0	0	0	0	0	0	0	0	0	0	0	0	0	0	0	0	0
FBtr0071806	1	1	0.201777	1	1	0.543913	1	1	0.0701066	0.238595	0.0453929	0.151776	0.637819	0.119716	0.144247	0.329232	0.140425	1	0.11864	1	0.970288	0.623143	0.891105	0.60851	0.498613	0.257392	0	0	0	0	0	0	0	0	0	0	0	0	0	0	0	0	0	0	0	0	0	0	0
FBtr0071811	0.199635	2.022	0.907281	0.942179	0.988106	1.09339	1.39502	1.19093	1.33376	1.41176	0.844362	1.67527	1.36556	1.00839	1.10096	0.740475	1.25869	0.844202	1.44137	1.16018	0.347641	0.32621	0.454713	0.289615	0.56936	0.369011	1	0	0	1	0	1	0	1	1	1	1	1	1	1	1	1	1	1	1	1	1	1	1
FBtr0071816	0.612626	7.54874	0.761835	1.95443	2.27222	2.47232	2.39971	2.5321	2.43785	1.59439	2.01741	3.10331	3.02846	3.11652	3.96952	1.93039	2.24773	2.8211	2.67688	3.13268	0.439767	0.556941	0.478669	0.684834	0.631956	0.72442	0	0	0	0	0	0	0	0	0	0	0	0	0	0	0	0	0	0	0	0	0	0	0
FBtr0071819	0.183972	1	0.182281	1	1	1	0.175999	1	0.00252385	0.00132507	0.00669783	0.00723286	0.825227	20.5492	0.479063	0.606633	1	0.0607109	1	7.88479	0.881988	1.96041	1.44382	0.769641	1.06244	0	0	0	0	0	0	0	0	0	0	0	0	0	0	0	0	0	0	0	0	0	0	0	0
FBtr0071820	2.23493	1.87216	1.17783	1.43457	1.39926	0.903912	0.984167	0.576	1.14465	1.1413	0.734944	1.10062	0.64345	0.618424	0.62812	0.703709	1.20203	1.08808	1.28459	1.02281	0.41116	0.375517	0.404585	0.380295	0.380033	0.47855	0	0	0	0	0	0	0	0	0	0	0	0	0	0	0	0	0	0	0	0	0	0	0
FBtr0071821	0.273571	7.57017	1.09704	1.8411	1.8814	2.6556	1.82789	1.34237	1.51992	1.36092	1.51897	0.979401	2.10301	2.30341	1.99771	0.909332	2.31528	2.98674	1.90578	2.4726	0.36004	0.794559	0.442283	0.948914	0.59411	0.854195	0	0	0	0	0	0	0	0	0	0	0	0	0	0	0	0	0	0	0	0	0	0	0
FBtr0071822	0.473033	6.07765	1.15215	0.788335	1.7564	2.12581	2.30394	1.5968	1.34021	1.58443	0.860243	2.51266	2.38305	1.6745	1.84208	1.26222	1.27063	1.18447	1.37627	1.26796	0.409148	0.7529	0.494923	0.764503	0.554415	0.888578	0	0	0	0	0	0	0	0	0	0	0	0	0	0	0	0	0	0	0	0	0	0	0
FBtr0071823	0.281838	0.268236	0.540004	2.1673	1.4241	0.639546	1.58255	2.26168	0.860923	0.487109	0.971592	0.636908	2.25144	0.937674	1.42234	0.545992	1.45299	1.3816	1.13575	0.942435	0.473177	0.678324	0.529426	0.828489	0.671501	0.770838	0	0	0	0	0	0	0	0	0	0	0	0	0	0	0	0	0	0	0	0	0	0	0
FBtr0071826	0.901317	8.20566	3.73937	2.4064	4.21323	2.7181	0.905849	0.270881	0.77316	0.574541	0.927286	1.26927	0.908623	0.00383715	0.166802	0.00632737	0.573268	0.930973	0.297485	0.704358	1.05845	1.44227	0.842098	1.13618	0.731391	0.99498	0	0	0	0	0	0	0	0	0	0	0	0	0	0	0	0	0	0	0	0	0	0	0
FBtr0071827	1.08947	2.80792	1.9742	1.57224	2.6747	1.93358	1.88925	2.71389	1.47598	1.55199	1.4225	0.92648	1.12433	0.6937	1.85742	1.60377	2.52417	1.75408	1.72967	1.28765	0.299054	0.402578	0.316678	0.380507	0.340201	0.266557	0	1	0	1	0	0	0	0	0	1	0	1	0	0	0	0	0	0	0	0	0	1	0
FBtr0071828	1.89327	0.367451	1.19272	0.233104	1.14184	0.249015	1.0264	0.276393	1.38474	0.576356	1.06428	0.426572	0.92764	0.227705	0.978353	0.403803	0.926381	0.44282	0.994864	0.515788	0.256125	0.330345	0.252277	0.370798	0.29895	0.213261	1	0	0	1	1	0	0	1	1	0	0	1	0	0	0	0	1	1	1	1	1	0	0
FBtr0071830	0.0565978	0.0390216	0.0590153	0.0184188	0.0560248	0.00828361	0.137657	0.205316	0.0257839	0.0609378	0.0219917	0.0464375	0.0356074	0.0199265	0.0355188	0.0907903	0.118303	0.0442153	0.014527	0.606042	0.732127	1.59708	0.699834	1.14531	0.52045	1.36646	0	0	0	0	0	0	0	0	0	0	0	0	0	0	0	0	0	0	0	0	0	0	0
FBtr0071832	0.813833	0.155918	0.645661	0.345914	0.587459	1.09525	1.56868	1.84396	3.4354	12.7184	0.83776	0.985743	1.50965	2.04629	1.7312	1.20706	1.14567	1.21856	1.24602	1.50201	0.616184	1.6017	0.834324	1.70352	0.501662	0.896293	1	1	1	1	1	0	0	1	0	1	0	1	1	1	1	1	1	1	1	1	1	0	0
FBtr0071833	0.692894	1.08011	0.504755	1.43288	1.72129	1.96576	1.27034	2.15833	0.969724	1.15295	1.07273	1.00063	0.545965	1.51296	1.01806	0.936548	1.46572	1.40564	1.33793	1.32504	0.37748	0.287522	0.41528	0.333492	0.529893	0.297227	1	3	1	3	1	3	1	3	1	3	1	3	1	3	1	3	0	1	0	1	1	2	1
FBtr0071834	0.191125	0.820612	0.408588	0.44088	0.661977	0.751848	0.729938	0.795711	0.394011	0.468084	0.472061	0.452985	0.248823	0.315368	0.41578	0.431707	0.540727	0.489448	0.453255	0.526927	0.365707	0.318549	0.410906	0.29794	0.495837	0.251413	0	0	0	0	0	0	0	0	0	0	0	0	0	0	0	0	0	0	0	0	0	0	0
FBtr0071835	0.275319	3.11956	0.531042	0.754889	2.08073	1.66679	2.01949	1.2211	1.92026	1.59039	1.61746	0.83065	1.86589	1.12377	1.22613	0.81178	1.77603	0.835287	1.96491	1.03704	0.421382	0.550777	0.567078	0.564641	0.780092	0.60501	0	0	0	0	0	0	0	0	0	0	0	0	0	0	0	0	0	0	0	0	0	0	0
FBtr0071836	4.63174	1	6.49012	1	60.1976	16.6193	0.0253972	1	1.49659	1	0.589362	1	0.39597	1	0.985278	1	16.8056	0.0678295	0.59775	0.0721471	2.02019	2.11266	1.93057	1.76968	1.59066	1.59224	0	0	0	0	0	0	0	0	0	0	0	0	0	0	0	0	0	0	0	0	0	0	0
FBtr0071838	0.243992	0.229196	0.344454	0.703433	0.72396	0.689404	0.810558	0.480769	0.601878	0.575356	0.612365	0.504514	0.753699	0.935289	0.730513	0.638254	0.477212	0.35776	0.443847	0.39103	0.331116	0.36924	0.394225	0.327724	0.524594	0.422964	4	3	3	4	5	4	4	5	5	4	4	5	5	4	4	5	5	4	4	5	5	4	4
FBtr0071841	0.104567	0.632195	1.16268	0.331114	0.724634	0.994923	1.51295	1.00428	0.627984	0.927246	0.384642	1.25883	0.243801	0.361766	0.230536	0.255327	1.75916	1.1038	1.14001	1.2867	0.731576	0.478341	0.681902	0.380918	0.692935	0.436569	0	0	0	0	0	0	0	0	0	0	0	0	0	0	0	0	0	0	0	0	0	0	0
FBtr0071842	0.38594	0.651846	0.532845	0.713274	1.28618	1.10081	1.27276	1.03359	0.578438	0.650703	0.861756	0.550046	0.534777	0.600692	0.679291	0.591746	0.73032	0.712057	0.850072	0.753262	0.396027	0.252673	0.473545	0.289763	0.548964	0.257364	0	0	0	0	0	0	0	0	0	0	0	0	0	0	0	0	0	0	0	0	0	0	0
FBtr0071843	2.5664	2.77345	1.77835	1.73105	1.81008	1.12435	1.07904	0.903895	1.44462	1.08913	1.22194	0.87045	1.37859	1.17746	1.08272	0.831372	0.833508	0.592757	0.787993	0.520878	0.384751	0.56847	0.324474	0.518579	0.33596	0.512356	1	1	1	1	1	1	1	1	1	1	1	1	1	1	1	1	0	0	0	0	1	0	0
FBtr0071845	0.411591	8.70943	0.794808	1.65121	1.74329	2.0755	1.50383	1.74874	1.39361	0.708956	1.20505	2.43171	2.71107	1.36028	1.82627	1.11779	2.36738	3.08012	2.74781	2.31939	0.465044	0.904877	0.41804	1.00767	0.554452	0.971999	0	1	0	1	1	1	1	1	0	1	0	1	0	2	0	2	1	0	0	1	1	2	1
FBtr0071848	0.227305	5.89844	0.660892	1.20128	1.11213	1.40633	1.34447	2.78547	1.74097	1.48214	0.711845	1.06737	1.35801	1.56095	1.04147	1.24731	1.6512	1.37919	1.29694	1.45058	0.421517	0.752995	0.560866	0.808166	0.592321	0.7679	0	0	0	0	0	0	0	0	0	0	0	0	0	0	0	0	0	0	0	0	0	0	0
FBtr0071849	0.543661	5.09663	0.80319	0.455872	1.20016	1.19474	1.61608	1.04512	2.07001	1.68874	0.955347	2.92768	2.00881	1.50589	1.55932	1.00239	1.35649	0.96937	1.45035	1.13268	0.364863	0.799341	0.468921	0.822377	0.450649	1.08985	0	0	0	0	2	0	0	2	0	2	0	2	2	2	2	2	2	2	2	2	2	2	2
FBtr0071853	1.51765	3.27269	0.97024	1.5399	1.9358	1.90696	2.06971	0.640872	3.80049	1.08122	1.31776	0.632303	1.56906	2.6139	1.7207	1.54585	1.03927	4.63252	0.30236	2.25698	0.568212	0.619346	0.515902	0.659585	0.304824	0.594079	0	0	0	0	0	0	0	0	0	0	0	0	0	0	0	0	0	0	0	0	0	0	0
FBtr0071854	0.638699	1	0.571092	1	0.692232	1	0.777503	613.992	0.489848	0.559189	0.4525	1.29866	2.65577	1.22117	1.11489	1.88732	0.885908	1	1.31744	0.00561545	0.683445	3.11168	0.204451	2.42642	0.130178	1.98703	0	0	0	0	0	0	0	0	0	0	0	0	0	0	0	0	0	0	0	0	0	0	0
FBtr0071855	0.0829862	0.137234	0.276922	0.217212	0.497394	0.65772	0.41806	0.304532	0.14818	0.11872	0.24907	0.204901	0.2402	0.159795	0.153814	0.202363	0.264678	0.150472	0.246719	0.200718	0.479275	0.668587	0.563702	0.729711	0.570066	0.697012	0	0	0	0	0	0	0	0	0	0	0	0	0	0	0	0	0	0	0	0	0	0	0
FBtr0071856	0.9904	0.94702	0.644891	0.530179	0.792679	0.819762	0.66455	0.672504	0.444896	0.429715	0.245495	0.469399	0.566185	0.332697	0.629963	0.536454	0.889682	0.664307	0.689741	0.52215	0.32475	0.313286	0.413522	0.320025	0.205631	0.243187	0	0	0	0	0	0	0	0	0	0	0	0	0	0	0	0	0	0	0	0	0	0	0
FBtr0071860	0.645351	1.00021	1.97667	1.43865	1.60456	2.22124	1.40015	2.05486	0.742825	0.952318	0.996801	0.658507	1.27363	1.06794	1.83453	1.31498	1.78403	1.78447	1.85388	1.59927	0.341905	0.360199	0.424841	0.457363	0.398715	0.335882	0	0	0	0	0	0	0	0	0	0	0	0	0	0	0	0	0	0	0	0	0	0	0
FBtr0071861	0.0443556	1.14874	0.243903	0.333226	0.209646	0.549523	0.117234	0.858825	2.99887	1.26709	0.94247	0.674956	0.357125	1.82698	1.20376	1.96892	0.273356	0.776231	0.345705	1.90265	1.33083	0.52597	1.50604	0.443987	0.588266	0.493659	0	0	0	0	0	0	0	0	0	0	0	0	0	0	0	0	0	0	0	0	0	0	0
FBtr0071862	0.544906	117.835	1.87601	2.8861	1.55047	1.15402	1.85084	1.23326	1.75942	1.58367	0.929031	2.22084	2.55595	1.69834	1.203	1.61158	2.05873	0.482732	1.54656	3.68355	0.364509	2.73031	0.390318	2.23945	0.429287	1.88595	0	0	0	0	0	0	0	0	0	0	0	0	0	0	0	0	0	0	0	0	0	0	0
FBtr0071863	0.0433466	1	0.0563681	16.0993	0.032893	0.0978149	0.385135	0.160282	0.0488472	0.0721316	0.010729	0.0372127	0.139598	0.0630586	0.0787433	0.0662687	0.126287	0.00551275	0.0078897	0.0160288	1.20083	2.86444	1.48016	2.22292	1.31908	1.8092	0	0	0	0	0	0	0	0	0	0	0	0	0	0	0	0	0	0	0	0	0	0	0
FBtr0071867	0.578846	1.25042	0.428072	0.56721	0.555754	0.948989	0.874347	1.37422	0.548259	0.573356	0.111711	0.604475	1.27665	0.902456	0.715788	0.786279	0.146363	0.183779	0.185841	0.29566	0.663168	0.51095	0.479406	0.407917	0.309817	0.347264	0	0	0	0	0	0	0	0	0	0	0	0	0	0	0	0	0	0	0	0	0	0	0
FBtr0071868	0.243159	0.128634	0.608807	0.398988	0.69514	0.669753	0.651075	0.333898	0.20968	0.185011	0.358884	0.310959	0.231758	0.197738	0.165124	0.28018	0.292857	0.370553	0.458633	0.333007	0.506513	0.467978	0.468983	0.564311	0.377178	0.58332	3	3	3	3	3	3	3	3	3	3	3	3	3	3	3	3	3	3	3	3	3	3	3
FBtr0071870	0.119066	1	0.02876	1	0.041325	0.0484433	0.20255	0.0361377	1	1	0.299342	1	6.47968	1	1	1	0.307109	0.997322	1	0.255048	1.8618	0.588915	1.29954	0.7265	0.820784	1.06104	0	0	0	0	0	0	0	0	0	0	0	0	0	0	0	0	0	0	0	0	0	0	0
FBtr0071871	0.585421	0.856316	0.0171831	0.0662269	0.800466	1.498	2.75764	1.37935	1.31906	1.20748	0.487469	0.250433	1	19.9467	0.369286	0.617134	1	0.601369	8.33256	9.98873	1.47421	1.76617	0.967699	0.684236	1.14567	0.686111	0	0	0	0	0	0	0	0	0	0	0	0	0	0	0	0	0	0	0	0	0	0	0
FBtr0071872	0.09712	23.5325	0.607476	0.230893	0.0640284	2.27055	2.0851	2.55906	0.675666	30.1814	0.200348	1	1	1	0.616062	1	1	1	1	1	0.813045	1.7135	1.22691	1.33314	1.32834	1.5349	0	0	0	0	0	0	0	0	0	0	0	0	0	0	0	0	0	0	0	0	0	0	0
FBtr0071878	1	1	1	1	0.162246	0.0760876	0.17789	7.89948	0.0064111	0.039082	0.0165041	0.000694035	0.0593475	1	0.348923	0.21014	1	1	0.0567179	1.10704	1.14246	1.76616	1.20579	1.8502	0.819104	1.45554	0	0	0	0	0	0	0	0	0	0	0	0	0	0	0	0	0	0	0	0	0	0	0
FBtr0071883	1.26532	0.934832	0.774212	0.765013	1.14705	1.25194	1.66581	1.40437	0.958321	1.57848	0.975673	0.997955	2.74063	1.91442	2.32795	1.71918	0.95578	0.962718	1.20075	1.02643	0.464662	0.305441	0.275519	0.267078	0.302754	0.267576	0	0	0	0	0	0	0	0	0	0	0	0	0	0	0	0	0	0	0	0	0	0	0
FBtr0071888	0.147318	1	0.0639608	1	0.348011	0.529081	0.500001	9.37069	0.074832	1	0.050923	1	0.1129	1	0.375487	1	0.145998	1	0.305921	0.641963	0.739011	1.52884	0.93645	1.49394	0.74375	1.43519	0	0	0	0	0	0	0	0	0	0	0	0	0	0	0	0	0	0	0	0	0	0	0
FBtr0071890	0.360318	2.32303	0.417279	0.853072	2.18944	2.06608	1.64296	0.947618	5.70299	7.18598	0.670934	7.62316	2.38045	0.510869	1.0617	0.619932	2.72557	0.458114	4.0037	0.852326	0.807561	1.16989	1.11048	0.881131	0.789524	0.488239	0	0	0	0	0	0	0	0	0	0	0	0	0	0	0	0	0	0	0	0	0	0	0
FBtr0071891	0.851987	4.49051	0.624225	17.4464	0.630983	1.14539	2.04018	2.0686	4.36559	3.02131	0.122037	1	2.1571	13.8976	0.202998	1.37622	13.7486	1	1	1	1.60261	1.28698	1.0908	1.29567	0.653144	1.2042	0	0	0	0	0	0	0	0	0	0	0	0	0	0	0	0	0	0	0	0	0	0	0
FBtr0071893	0.8574	3.91249	0.554357	0.799477	0.425129	3.01227	1.67574	1.82089	2.80578	1.6968	0.084808	1	0.671204	0.742906	0.594549	0.433947	1.20379	0.0902377	4.07786	3.62921	0.963783	0.79632	0.94425	0.589685	0.639679	0.570437	0	0	0	0	0	0	0	0	0	0	0	0	0	0	0	0	0	0	0	0	0	0	0
FBtr0071894	0.323371	9.18301	0.471992	0.905873	0.459883	1.99558	1.10673	1.10102	1.12082	0.613167	0.482954	0.968879	1.72199	0.751515	1.09718	0.908053	3.56753	0.0557625	1	20.9697	0.843963	1.76328	0.537886	1.35134	0.593895	1.1992	0	0	0	0	0	0	0	0	0	0	0	0	0	0	0	0	0	0	0	0	0	0	0
FBtr0071897	0.102331	0.151359	0.199393	0.183562	0.349499	0.576464	0.366608	0.286851	0.131256	0.119904	0.211712	0.180503	0.441293	0.17266	0.18008	0.213521	0.250286	0.173088	0.331696	0.174253	0.43345	0.589109	0.48381	0.679049	0.495986	0.645747	0	0	0	0	0	0	0	0	0	0	0	0	0	0	0	0	0	0	0	0	0	0	0
FBtr0071898	0.291379	15.535	0.549133	2.18641	0.741189	1.36024	0.769165	0.342311	0.223134	0.28271	0.320442	0.46466	3.43408	0.643324	0.161843	0.255832	0.393868	0.443383	0.359892	0.388379	1.34437	2.15895	0.493688	1.78752	0.37508	1.4743	0	2	0	2	0	2	0	2	2	3	2	3	3	3	3	3	0	0	0	0	2	3	2
FBtr0071899	0.0721856	0.489356	1.64738	0.263564	0.287829	0.601896	0.475881	0.328854	0.185823	0.123722	0.277956	0.175694	0.763129	0.339596	0.36728	0.15469	0.262064	0.248415	0.260784	0.21868	0.992934	0.515471	1.18457	0.558048	1.13394	0.364644	0	2	0	2	1	0	0	1	0	4	0	4	6	7	6	7	2	4	1	5	6	4	3
FBtr0071903	1.52183	1.61641	0.650896	1.25878	1.70982	1.36637	0.725526	1.49095	0.982628	0.896269	1.05775	0.500611	0.603191	0.994568	0.784626	0.774198	1.28564	0.879436	1.37412	0.918271	0.362625	0.32777	0.384351	0.351003	0.47038	0.10794	1	2	1	2	2	2	2	2	1	2	1	2	1	1	1	1	1	1	1	1	1	2	1
FBtr0071904	0.0635406	0.124546	0.00822848	0.0266551	0.0195573	0.160693	0.29456	0.434054	0.259473	0.227747	0.237658	0.279831	0.464663	0.375907	0.4534	0.311434	0.777197	0.588757	0.957963	0.647011	0.898102	0.625276	0.886504	0.672613	1.39105	0.935656	0	0	0	0	0	0	0	0	0	0	0	0	0	0	0	0	0	0	0	0	0	0	0
FBtr0071905	2.69339	1.38053	1.79186	1.62489	1.47004	1.53917	1.49738	2.34081	1.05008	1.10915	0.689669	0.916245	0.684248	0.802599	0.96188	1.03277	1.46485	1.61993	1.42519	1.90765	0.432266	0.335534	0.448729	0.334044	0.307185	0.247015	0	1	0	1	0	1	0	1	0	1	0	1	0	1	0	1	0	0	0	0	0	1	0
FBtr0071907	2.49624	2.49184	1.82189	1.5296	1.53141	1.32392	1.45065	1.35169	1.14484	0.793872	0.969264	0.774544	1.312	1.13139	0.793159	0.756021	1.81	1.8922	1.3113	1.25399	0.3347	0.410088	0.346598	0.455952	0.260275	0.330065	1	1	1	1	1	1	1	1	1	1	1	1	1	1	1	1	1	1	1	1	1	1	1
FBtr0071910	0.280689	0.755494	0.165733	0.485263	0.485511	0.316632	0.325641	0.177144	0.360551	0.305107	0.321221	0.374514	0.201485	0.343373	0.259862	0.228439	0.488138	0.429566	0.495189	0.451049	0.351934	0.41725	0.322569	0.496922	0.421346	0.573806	0	0	0	0	0	0	0	0	0	0	0	0	0	0	0	0	0	0	0	0	0	0	0
FBtr0071911	5.12871	5.00914	1.61135	2.26855	1.38409	0.887998	0.108487	0.334995	0.927695	1.2727	1.34541	1.22644	0.125235	0.370679	0.204276	0.374675	0.105585	0.194329	2.00479	0.859995	1.17509	1.13323	0.992601	0.915874	1.04523	0.982281	0	0	0	0	0	0	0	0	0	0	0	0	0	0	0	0	0	0	0	0	0	0	0
FBtr0071920	0.555834	0.547143	0.127168	0.110377	0.281329	0.177187	2.0322	0.158129	1.24625	11.2777	0.527074	0.00830481	1	0.0769181	0.260282	0.0879446	1	1	0.0719988	1	0.864654	2.40618	0.902385	2.21164	1.16609	0.810853	0	0	0	0	0	0	0	0	0	0	0	0	0	0	0	0	0	0	0	0	0	0	0
FBtr0071921	0.209544	0.111465	0.972875	0.0499902	0.975101	0.162818	1.36413	0.431456	2.26483	1	0.494813	0.106777	0.128014	6.55057	0.656747	0.197379	2.63607	0.185432	0.173463	7.8735	0.883427	1.7709	0.688895	1.17116	0.549271	0.889909	0	0	0	0	0	0	0	0	0	0	0	0	0	0	0	0	0	0	0	0	0	0	0
FBtr0071922	0.451886	6.3922	0.809456	1.56237	1.72599	2.54813	1.77261	1.62369	1.38106	1.31245	1.52029	1.62963	1.27103	1.51684	0.452262	0.503024	0.678792	0.729478	1.0966	0.764224	0.44584	0.913799	0.416865	0.775499	0.556651	0.753838	1	1	1	1	1	1	1	1	1	1	1	1	1	1	1	1	1	1	1	1	1	1	1
FBtr0071927	0.281151	17.0741	0.492723	0.682101	0.485254	0.499076	0.832973	0.94314	0.333811	0.431026	0.233626	0.637981	0.228716	0.127825	0.174361	0.182473	0.506922	0.158436	0.874026	0.142992	0.554413	2.5254	0.492508	1.98706	0.43727	1.70536	0	0	0	0	0	0	0	0	0	0	0	0	0	0	0	0	0	0	0	0	0	0	0
FBtr0071928	0.205944	0.207144	1.14616	3.1653	0.333903	0.526898	1.55227	0.38102	1.43991	0.149245	1.57395	0.114382	1.10706	0.163465	1.19097	0.0179695	1.72998	0.515811	1.16028	0.602507	0.444034	1.58912	0.59359	1.57113	0.799093	1.31102	0	0	0	0	0	0	0	0	0	0	0	0	0	0	0	0	0	0	0	0	0	0	0
FBtr0071929	0.540271	15.5037	1.68208	0.343645	0.314992	1.06688	0.624299	0.956809	0.69592	2.90717	0.129949	1.67343	0.563012	0.120828	0.222264	0.168969	0.710769	0.266717	0.502089	0.262374	0.715839	2.02485	0.813485	1.55724	0.770007	1.64829	0	0	0	0	0	0	0	0	0	0	0	0	0	0	0	0	0	0	0	0	0	0	0
FBtr0071931	0.530716	5.50094	2.23973	2.77115	1.42513	2.78915	1.41943	3.07337	0.335821	2.86165	1.03671	0.448485	0.710288	0.581026	1.29407	0.945107	2.39666	1.40631	0.488652	2.31422	0.601039	0.667198	0.594132	0.551058	0.497264	0.373214	0	0	0	0	0	0	0	0	0	0	0	0	0	0	0	0	0	0	0	0	0	0	0
FBtr0071933	1.72931	1.20969	1.10631	0.764139	1.16911	1.28184	0.987703	1.2216	0.42707	0.624558	0.718322	0.576086	1.06979	1.30277	0.616105	1.07725	1.26166	1.84615	1.42796	1.43338	0.369349	0.344299	0.431977	0.344536	0.264003	0.213418	0	0	0	0	0	0	0	0	0	0	0	0	0	0	0	0	0	0	0	0	0	0	0
FBtr0071934	0.290316	7.54994	1.03265	1.02145	1.37518	1.66408	1.41146	1.20469	1.07007	0.829116	1.43295	0.538315	0.760462	0.680107	1.04013	0.618673	1.58713	1.1133	1.34953	1.3035	0.341336	1.2715	0.394377	1.25536	0.50631	1.09728	1	1	1	1	1	1	1	1	1	1	1	1	1	1	1	1	1	1	1	1	1	1	1
FBtr0071935	0.331396	0.352371	0.414704	0.336452	0.651688	0.729953	0.591058	0.366509	0.222921	0.256562	0.359112	0.314817	0.426672	0.295916	0.24956	0.331206	0.423024	0.357864	0.400578	0.342137	0.328744	0.356037	0.380543	0.431788	0.300501	0.42455	0	0	0	0	0	0	0	0	0	0	0	0	0	0	0	0	0	0	0	0	0	0	0
FBtr0071936	0.558417	0.377735	0.38587	0.274928	0.398949	0.248575	0.286513	0.245305	0.193277	0.246546	0.250958	0.323482	0.356007	0.285732	0.357896	0.288477	0.41946	0.41366	0.318473	0.285848	0.285777	0.190359	0.378106	0.188593	0.276065	0.216874	1	1	1	1	1	2	1	2	1	1	1	1	1	1	1	1	1	1	1	1	1	1	1
FBtr0071937	1.0558	0.842424	1.6144	1.35232	1.22424	0.874422	0.733417	0.598433	0.889668	0.605455	0.887967	0.929973	0.941517	0.694726	1.01975	0.98013	1.41941	1.20603	1.35972	0.940312	0.251014	0.269147	0.295994	0.318197	0.316948	0.343944	0	0	0	0	0	0	0	0	0	0	0	0	0	0	0	0	0	0	0	0	0	0	0
FBtr0071938	0.543317	0.702046	0.786625	0.577939	0.628547	0.572379	0.606484	0.514795	0.302785	0.336466	0.420568	0.282226	0.129866	0.242571	0.407238	0.333056	0.423065	0.418104	0.482428	0.446956	0.387001	0.334485	0.308834	0.319615	0.1613	0.133245	0	0	0	0	0	0	0	0	0	0	0	0	0	0	0	0	0	0	0	0	0	0	0
FBtr0071940	0.236479	0.374593	0.1961	0.37286	0.449798	0.522893	0.62523	0.658801	0.120289	0.106904	0.146503	0.0652807	0.122548	0.694729	0.284615	0.325348	0.249751	0.0650966	0.0715977	2.73714	0.679874	1.32903	0.67424	0.659251	0.529288	0.284244	0	0	0	0	0	0	0	0	0	0	0	0	0	0	0	0	0	0	0	0	0	0	0
FBtr0071942	0.467359	0.938528	0.549701	0.360438	1.3216	0.496223	1.4239	0.387193	1.25008	1.44396	0.966846	1.56568	2.09947	0.769409	1.51677	0.727425	1.16399	0.47105	1.07712	0.555621	0.398707	0.553619	0.409606	0.622413	0.533497	0.492045	1	0	0	1	4	0	0	4	3	0	0	3	4	1	1	4	4	1	1	4	4	2	2
FBtr0071951	1.67735	1.15817	0.976019	0.519067	0.649691	0.639291	0.605228	0.55824	0.405655	0.323056	0.312684	0.188633	0.513839	0.3122	0.468041	0.383046	0.771136	0.598587	0.537651	0.469914	0.569919	0.518557	0.64822	0.592795	0.506877	0.413576	0	0	0	0	1	0	0	1	0	0	0	0	1	0	0	1	0	0	0	0	0	0	0
FBtr0071953	0.77757	2.12055	1.59529	1.83188	1.29548	1.23283	1.10596	0.751096	0.710255	0.782746	0.673105	1.05381	2.23917	1.54524	0.0632841	0.460407	0.772722	0.443511	0.120729	0.416154	0.702796	0.570252	0.361724	0.435299	0.28719	0.412891	1	2	1	2	2	4	2	4	0	2	0	2	0	1	0	1	0	2	0	2	1	2	1
FBtr0071958	2.36305	1.41723	1.30075	0.864361	0.894529	0.325528	0.972741	0.581018	1.03252	0.823655	1.06682	0.501496	1.92213	1.33693	0.989387	0.697916	1.35862	1.23382	1.24339	1.02627	0.360044	0.418105	0.433937	0.509409	0.489455	0.587661	0	0	0	0	0	0	0	0	0	0	0	0	0	0	0	0	0	0	0	0	0	0	0
FBtr0071963	0.797843	0.927816	0.288824	0.4642	0.673977	1.07916	0.696958	0.837959	0.0907351	0.0274404	0.052591	0.0238094	0.1769	0.65052	0.165113	0.214778	0.329614	0.759236	0.233692	2.48687	0.774328	0.955986	0.760564	0.82303	0.363963	0.31636	2	0	0	2	2	1	1	2	1	1	0	2	0	0	0	0	0	0	0	0	0	0	0
FBtr0071964	1	1	4.16544	1	0.314977	0.154816	1.0814	0.118865	0.181757	1	2.08858	1	1	1	1	1	8.21561	1	0.0454238	7.99211	1.31874	1.5066	1.00824	0.625988	1.04731	0.8771	0	0	0	0	0	0	0	0	0	0	0	0	0	0	0	0	0	0	0	0	0	0	0
FBtr0071965	0.0976002	1	0.348409	1	1	1	1.06765	1	0.307026	1	1	1	1	1	1	0.142712	8.23527	5.02188	1.14988	0.848106	1.5714	1.02547	0.678047	0	0.76381	0	0	0	0	0	0	0	0	0	0	0	0	0	0	0	0	0	0	0	0	0	0	0	0
FBtr0071966	0.219629	1	4.20083	1	9.67819	0.081172	1.76884	2.02554	0.00358991	0.0149138	0.00997661	0.0286073	0.205812	0.0650453	0.300025	0.233381	1	1	0.0689823	0.588959	1.76218	1.0862	1.43822	1.16371	1.04494	0.773741	0	0	0	0	0	0	0	0	0	0	0	0	0	0	0	0	0	0	0	0	0	0	0
FBtr0071967	1	1	1	1	1	1	0.0901789	1	0.000785747	0.00108226	0.0311129	0.000478052	0.727607	1	0.319108	0.367718	0.0323453	0.0371824	1	230.599	0.891777	3.08185	1.01129	0.773691	0.588847	0	0	0	0	0	0	0	0	0	0	0	0	0	0	0	0	0	0	0	0	0	0	0	0
FBtr0071968	0.263925	1	0.54522	1	2.64325	0.0842169	0.203043	1.53018	0.374777	0.326305	0.246136	0.24046	0.522615	3.05914	0.517457	0.56463	9.4874	0.230531	0.198228	8.48994	1.93295	1.54954	1.33816	0.811549	1.2721	0.664803	0	0	0	0	0	0	0	0	0	0	0	0	0	0	0	0	0	0	0	0	0	0	0
FBtr0071969	0.145304	1.89873	0.609491	4.62965	1.77364	0.104578	1.35863	0.332964	5.75921	2.56751	2.09555	0.738998	0.64732	0.153059	1.92895	0.848326	2.91791	0.159838	1.11822	1.48357	0.874017	1.11242	1.02111	1.0019	0.753144	1.1967	0	0	0	0	0	0	0	0	0	0	0	0	0	0	0	0	0	0	0	0	0	0	0
FBtr0071973	0.11938	1	0.492343	6.9918	1	0.550041	0.0931736	4.01168	0.0246833	0.00576231	0.0167553	0.00508004	0.297054	0.129355	0.110491	0.18528	1	0.0713485	0.124923	1.11019	1.16235	1.63905	1.33769	1.3502	0.994171	0.953846	0	0	0	0	0	0	0	0	0	0	0	0	0	0	0	0	0	0	0	0	0	0	0
FBtr0071974	0.345975	1	0.207308	1	1	0.0832741	0.143144	0.0627038	0.184696	0.167893	0.188142	0.126285	0.912002	3.33163	0.523688	0.549331	1	5.04398	1	9.76169	0.697847	1.4931	0.952046	1.13354	0.927006	0.997729	0	0	0	0	0	0	0	0	0	0	0	0	0	0	0	0	0	0	0	0	0	0	0
FBtr0071975	0.235454	0.140968	0.154479	1	0.207066	1	1.05455	1	0.0310115	0.0116528	0.0113047	0.00624855	0.268404	1.99347	0.228527	0.218159	0.0687255	0.683038	0.0573215	16.2654	1.31142	2.22656	1.37841	0.989509	1.03924	0.546985	0	0	0	0	0	0	0	0	0	0	0	0	0	0	0	0	0	0	0	0	1	0	0
FBtr0071976	0.365541	1	0.22169	1	1	0.162938	0.214405	1.58933	0.190948	1	0.0821171	0.166857	0.241452	1	0.048094	1	12.3186	0.653343	0.609861	2.05131	2.48585	0.595241	0.963115	0.678545	0.828013	0.625432	0	0	0	0	0	0	0	0	0	0	0	0	0	0	0	0	0	0	0	0	0	0	0
FBtr0071977	1	1	0.224767	0.0728321	0.332126	0.165378	2.98394	1	0.324543	0.119586	1	1	0.244717	1	1	1	5.44781	4.70783	0.636409	0.230046	1.26076	1.32162	1.06665	0.863576	1.12694	0.911418	0	0	0	0	0	0	0	0	0	0	0	0	0	0	0	0	0	0	0	0	0	0	0
FBtr0071978	0.951691	2.79117	1.57327	0.816363	0.721722	1.5905	0.492276	0.535675	0.307639	0.433508	0.172793	0.330666	0.522468	0.460906	0.403608	0.724586	10.8346	1	17.6205	0.929978	1.77373	0.770016	0.725476	0.879287	0.497651	0.703979	0	1	0	1	0	1	0	1	0	1	0	1	0	1	0	1	0	1	0	1	0	0	0
FBtr0071979	0.268725	1.96644	0.858103	2.17584	1.16408	2.52693	1.25267	0.588646	1.02949	0.401313	2.07613	0.292602	13.091	0.0988247	1.62912	0.0207117	0.719563	0.307051	0.457774	0.377853	1.70515	1.08743	0.531455	0.757657	0.502108	0.468072	1	0	0	1	0	2	0	2	2	2	2	2	2	2	2	2	0	0	0	0	0	0	0
FBtr0071980	2.06907	10.0534	0.184401	0.280805	0.0765259	1.55561	0.697892	1.32446	0.523257	1.21087	0.521301	1.07905	1	1	0.0543749	0.0435046	0.0402158	59.8803	0.59428	2.57814	1.06557	2.34038	1.06025	1.42601	1.20979	1.37243	0	0	0	0	0	0	0	0	0	0	0	0	0	0	0	0	0	0	0	0	0	0	0
FBtr0071982	0.44489	0.396615	0.611876	0.619436	0.965615	0.817546	0.611921	0.725031	1.31878	1.09235	0.941943	1.69504	0.941226	2.01876	0.364736	0.867753	0.640544	0.690824	0.66514	0.814028	0.382567	0.517809	0.392263	0.511399	0.333009	0.283149	0	0	0	0	0	0	0	0	0	0	0	0	0	0	0	0	0	0	0	0	0	0	0
FBtr0071984	0.23083	0.116137	0.630624	0.446329	0.609927	0.852413	0.679885	0.696821	0.282493	0.33119	0.358606	0.367552	0.349271	0.231081	0.868081	0.561818	0.65947	0.651886	0.769869	0.697743	0.405801	0.474591	0.423329	0.567429	0.384426	0.608948	0	0	0	0	0	0	0	0	0	0	0	0	0	0	0	0	0	0	0	0	0	0	0
FBtr0071985	1.3616	1.60946	0.979551	1.05142	0.770913	0.962057	0.88563	0.949648	0.597425	1.10519	0.519336	0.755476	1.29742	0.790813	1.04685	0.944998	0.930738	0.967046	0.630551	0.852226	0.314821	0.240329	0.3555	0.269546	0.256229	0.274823	0	0	0	0	0	0	0	0	0	0	0	0	0	0	0	0	0	0	0	0	0	0	0
FBtr0071988	0.146353	0.110398	1.45805	0.257932	1.80306	1.30636	1.71792	1.77998	2.50815	1.54735	1.86076	1.07307	2.00248	1.16514	2.07293	1.49514	2.11321	1.36485	1.81626	1.29951	0.359011	0.475869	0.495937	0.676842	0.601524	0.93825	0	0	0	0	0	0	0	0	0	0	0	0	0	0	0	0	0	0	0	0	0	0	0
FBtr0071989	1	0.112598	1	1	1	1	0.147562	1	1	1	1	0.115384	0.714722	1.78641	0.0684631	17.3592	1.23164	0.359975	0.087762	1	0.617768	2.12455	0.405636	0.649294	0.54165	0.5702	0	0	0	0	0	0	0	0	0	0	0	0	0	0	0	0	0	0	0	0	0	0	0
FBtr0071990	1	1	1	1	0.251557	1	0.11125	1	1	1	0.0930378	4.48972	4.63698	104.611	0.650156	0.867805	0.112408	0.0520237	0.0944912	23.0519	1.53654	2.36472	0.81206	0.900767	0.805948	0	0	0	0	0	0	0	0	0	0	0	0	0	0	0	0	0	0	0	0	0	0	0	0
FBtr0071994	1.19815	0.930721	1.01957	0.535403	1.59222	1.15598	1.84333	1.06993	1.35515	1.77725	1.31657	2.01083	1.84496	2.34334	1.11576	1.97293	1.24648	1.01054	1.25276	1.15277	0.209041	0.419229	0.210618	0.440899	0.264192	0.297468	3	4	3	4	4	5	4	5	4	4	3	5	4	0	0	4	2	1	1	2	3	4	2
FBtr0071995	0.222497	0.13855	0.0442323	0.078193	0.0440077	0.035112	0.0278732	0.036959	0.0562674	0.0362164	0.0276655	0.0104097	0.0629902	0.0851985	0.149339	0.167551	0.116883	0.378436	0.0690508	4.27664	0.764446	2.52287	1.06922	0.822634	1.08934	0.671663	0	0	0	0	0	0	0	0	0	0	0	0	0	0	0	0	0	0	0	0	0	0	0
FBtr0071996	1.60413	1.6983	1.04445	1.69311	0.96544	0.674967	0.445191	0.64287	1.32301	1.23538	1.01657	0.677647	0.873397	1.10622	1.39453	0.93257	0.817395	0.584472	0.653999	0.667363	0.345373	0.433102	0.364143	0.461275	0.46745	0.508562	0	0	0	0	0	0	0	0	0	0	0	0	0	0	0	0	0	0	0	0	0	0	0
FBtr0071998	0.161281	1	1	1	1	1	1	1	0.13447	0.0165087	0.0755737	0.0102121	0.246408	1	0.319377	0.229107	4.39124	1	0.0919395	2.6017	1.5542	0.839483	0.855561	0.759182	0.53062	0	0	0	0	0	0	0	0	0	0	0	0	0	0	0	0	0	0	0	0	0	0	0	0
FBtr0071999	0.239376	3.41035	0.202241	7.48969	0.0249395	0.598904	0.638873	1.96807	0.0132282	0.00981309	0.00442163	0.00321539	0.0828392	1.21204	0.100281	0.0909178	0.268294	1	0.0430615	1.46289	1.19501	1.32273	1.30198	1.28499	0.937766	0.884736	0	0	0	0	0	0	0	0	0	0	0	0	0	0	0	0	0	0	0	0	0	0	0
FBtr0072001	0.203136	0.0820796	7.73342	1	1	0.082014	0.19453	1	0.0885027	0.0685976	0.0472984	0.0112587	0.488785	2.34859	0.233055	0.364933	1	1	1	4.72643	1.9426	1.38098	1.97626	1.29845	1.6004	0.979589	0	0	0	0	0	0	0	0	0	0	0	0	0	0	0	0	0	0	0	0	0	0	0
FBtr0072002	0.209448	0.354561	0.244276	0.293926	0.348902	1.51326	0.111508	0.224609	0.0684448	0.0213064	0.0177042	0.0120399	0.182156	1.76523	0.13554	0.105197	0.488826	1	0.184123	1.24226	0.691793	1.01495	0.739243	1.3927	0.4287	1.0282	0	0	0	0	0	0	0	0	0	0	0	0	0	0	0	0	0	0	0	0	0	0	0
FBtr0072004	0.127307	1	0.849579	1	2.87467	1	0.121424	1	0.0131056	1	0.00275482	1	0.141713	1	0.109122	1	0.011518	1	1	1	1.71404	0	1.69712	0	1.30888	0	0	0	0	0	1	1	0	2	0	0	0	0	0	0	0	0	0	0	0	0	0	1	0
FBtr0072006	5.49376	0.0752953	1.62522	7.94755	6.24536	0.0264025	0.180711	1	0.281881	0.163802	0.191076	0.118989	0.510098	2.99058	0.407803	0.52438	0.457093	1	1	1.27121	1.39013	1.60802	1.19884	2.02699	0.869251	1.687	0	0	0	0	0	0	0	0	0	0	0	0	0	0	0	0	0	0	0	0	0	0	0
FBtr0072010	0.218011	0.177153	0.662346	0.532295	0.679029	0.606383	0.429459	0.47943	0.306937	0.305598	0.273703	0.181756	0.137987	0.43414	0.191384	0.358998	0.18583	0.139976	0.115305	0.197485	0.642443	0.487954	0.467597	0.485127	0.438904	0.419872	1	2	1	2	3	3	3	3	3	3	3	3	2	2	1	3	2	1	1	2	2	2	1
FBtr0072011	0.21188	14.5993	0.794895	0.281207	0.972649	1.34328	0.935631	1.15133	0.871769	0.567888	0.403511	1.78713	0.813494	1.15159	0.450788	0.621345	1.26501	0.594717	0.927974	0.764128	0.413222	1.90242	0.450308	1.6931	0.484375	1.57757	0	0	0	0	0	0	0	0	0	0	0	0	0	0	0	0	0	0	0	0	0	0	0
FBtr0072012	0.106018	0.868394	0.126452	0.255384	0.542084	0.726119	0.714218	0.546765	0.290944	2.31551	0.590218	0.87563	0.990569	0.216399	0.276581	0.0991525	0.833592	0.817343	1.8306	0.727006	0.81905	0.834955	0.648536	0.769814	0.816537	0.441081	0	0	0	0	0	0	0	0	0	0	0	0	1	1	1	1	1	1	1	1	1	0	0
FBtr0072014	0.55449	0.554538	0.53184	1.20301	0.886966	1.26526	0.790189	1.10373	0.594912	1.11814	0.601069	1.17321	0.780245	1.20382	0.612451	0.991416	0.568591	0.794457	0.555158	0.701173	0.191391	0.241574	0.218263	0.242215	0.253762	0.314981	0	0	0	0	0	0	0	0	0	0	0	0	0	0	0	0	0	0	0	0	0	0	0
FBtr0072016	0.102829	1	0.290969	0.0950021	0.198066	0.35528	0.381034	0.273228	0.134488	0.378058	0.0776586	0.215463	0.683628	0.371216	0.27466	0.479083	0.356567	0.00319902	0.351735	0.187745	0.623192	0.814899	0.59786	0.822541	0.49235	0.915956	0	0	0	0	0	0	0	0	0	0	0	0	0	0	0	0	0	0	0	0	0	0	0
FBtr0072019	1	1	1	1	1	1	0.0676798	1	1	11.7865	0.0561495	1	0.685829	1	0.456314	0.679427	18.0214	1	1	39.1105	2.2613	2.07756	0.704838	1.57397	0.607834	0	0	0	0	0	0	0	0	0	0	0	0	0	0	0	0	0	0	0	0	0	0	0	0
FBtr0072020	1	3.02702	1	3.7288	1	1	1	1	0.332167	1	0.320349	0.175674	1	8.48993	0.145553	0.00330057	1.69809	11.641	26.4148	10.2751	2.38936	1.09785	0.448711	0.839668	0	0.640699	0	0	0	0	0	0	0	0	0	0	0	0	0	0	0	0	0	0	0	0	0	0	0
FBtr0072021	2.77948	1	1.44089	12.3245	11.3855	24.2988	0.357744	1	1	1	1	5.71112	0.928724	1	0.0504082	0.0833817	0.189644	1.16925	1	1	1.67978	1.60197	1.39947	1.23505	1.25993	1.15229	0	0	0	0	0	0	0	0	0	0	0	0	0	0	0	0	0	0	0	0	0	0	0
FBtr0072022	1	1	0.200382	0.035681	0.176893	0.510808	1	1	0.095561	0.100868	0.12996	0.0720944	0.609786	0.624663	0.327951	0.387347	6.14602	0.0706468	1	69.6125	1.70646	2.98073	1.01449	1.00866	0.788362	0.72611	0	0	0	0	0	0	0	0	0	0	0	0	0	0	0	0	0	0	0	0	0	0	0
FBtr0072023	0.157289	1	0.216806	1	0.321941	0.55023	0.286984	0.856848	0.186578	1	0.178555	1	0.236264	1	0.0468043	0.0154293	1	0.652	1	1	0.94683	0.400781	0.292007	0.201086	0.298726	0.248953	0	0	0	0	0	0	0	0	0	0	0	0	0	0	0	0	0	0	0	0	0	0	0
FBtr0072027	0.443856	0.346149	0.255743	0.821462	0.313863	0.476145	0.456913	0.791004	0.18619	0.891494	0.160517	0.358281	0.494257	1.2526	0.250594	0.77286	0.284162	0.551855	0.290377	0.464174	0.365895	0.424163	0.417221	0.403846	0.268348	0.385295	2	2	2	2	2	2	2	2	2	1	1	2	0	1	0	1	0	2	0	2	1	2	1
FBtr0072029	1.54772	1.12645	0.610959	0.558927	0.726333	0.527541	0.807057	0.793002	0.412075	0.459321	0.442104	0.467143	0.491274	0.749816	0.434633	0.334479	0.713863	0.70169	0.632222	0.666272	0.489761	0.350872	0.54993	0.398091	0.459548	0.368097	0	0	0	0	0	0	0	0	0	0	0	0	0	0	0	0	0	0	0	0	0	0	0
FBtr0072030	2.53526	1.38192	3.63903	1.37728	2.30277	1.94176	1.76314	2.16347	1.72441	1.38626	1.39102	0.896413	3.07043	1.19247	2.12857	1.47492	2.39041	1.75886	2.49323	1.56008	0.282414	0.241852	0.36282	0.298868	0.308074	0.232486	0	0	0	0	0	0	0	0	0	0	0	0	0	0	0	0	0	0	0	0	0	0	0
FBtr0072033	3.48357	1.92158	3.71864	1.3335	1.02864	0.811457	1.30363	1.73101	1.09188	0.904194	0.83925	1.57574	2.60877	1.36974	1.52756	1.43104	1.68191	1.46708	1.69957	1.31192	0.539415	0.243088	0.690587	0.325239	0.593034	0.338628	0	0	0	0	0	0	0	0	0	0	0	0	0	0	0	0	0	0	0	0	0	0	0
FBtr0072036	0.914373	0.500148	0.667432	1.04932	0.736196	1.34088	0.793989	1.05803	0.792837	1.03021	0.510557	0.830597	0.672631	1.02683	0.602772	0.704184	0.502661	0.596391	0.571504	0.661646	0.198199	0.298954	0.186258	0.290446	0.134453	0.35635	1	1	1	2	1	1	1	2	1	1	1	2	1	1	1	2	1	1	1	2	1	1	1
FBtr0072037	0.703214	1.02628	0.280825	0.84501	0.414268	0.591303	0.695417	0.682427	0.509608	0.922382	0.541354	0.516782	0.877259	2.10626	0.740668	0.723066	0.453904	0.568976	0.459511	0.564044	0.318957	0.551189	0.311398	0.26048	0.401768	0.243376	0	0	0	0	0	0	0	0	0	0	0	0	0	0	0	0	0	0	0	0	0	0	0
FBtr0072038	0.120271	0.0719123	0.448341	0.37182	0.673282	0.614371	0.516999	0.561371	0.272847	0.492177	0.315862	0.343052	0.435254	0.337609	0.27201	0.541202	0.611716	0.689109	0.586516	0.50553	0.416959	0.391488	0.500502	0.478571	0.529519	0.605574	0	0	0	0	1	4	1	4	0	0	0	0	1	0	0	1	1	4	1	4	1	4	1
FBtr0072040	1.72424	471.609	3.62242	0.849239	2.88206	2.05615	3.09096	2.45521	10.0784	31.4738	0.0197062	0.338754	5.65325	0.924673	1	0.0610691	0.0189371	1	1	0.0202862	1.05561	2.89889	0.962935	2.23924	0.282801	1.97004	0	0	0	0	0	0	0	0	0	0	0	0	0	0	0	0	0	0	0	0	0	0	0
FBtr0072041	0.283861	1	1.24854	1	0.251557	0.281692	0.622107	0.0915001	1.3852	0.56204	0.501856	0.209352	0.50679	12.3442	0.603243	0.278989	0.112408	1	1	1.10251	0.656855	2.08701	0.6814	0.762917	0.769321	0.802286	0	0	0	0	0	0	0	0	0	0	0	0	0	0	0	0	0	0	0	0	0	0	0
FBtr0072043	1	1	1	1	1	1	1	1	0.00975125	0.0132036	0.0122525	0.00308476	0.0940259	0.633622	0.0834494	0.0811445	1	0.113834	10.9062	1.51505	2.04909	0.856681	0.761885	0.765187	0	0	0	0	0	0	0	0	0	0	0	0	0	0	0	0	0	0	0	0	0	0	0	0	0
FBtr0072045	0.188849	29.3089	1	385.106	1	8.70929	0.0684881	77.56	0.0122968	1.75761	0.0405825	0.369239	0.0715265	20.6693	0.168467	0.42377	0.492248	30.5922	0.0392572	14.9167	1.26595	2.06491	1.24698	1.79489	0.89567	1.40349	0	0	0	0	0	0	0	0	0	0	0	0	0	0	0	0	0	0	0	0	0	0	0
FBtr0072046	0.173034	1	0.874547	1	1	1	0.0421934	1	0.0228765	0.0313729	0.0245074	0.0103098	0.295167	1	0.149581	2.00266	0.45326	1	0.167984	19.0712	1.09876	2.12992	1.27821	0.750696	0.927731	0	0	0	0	0	0	0	0	0	0	0	0	0	0	0	0	0	0	0	0	0	0	0	0
FBtr0072047	3.99781	1.84102	2.75984	2.59532	0.510527	3.0649	0.497397	1.30108	0.40511	0.663256	0.397322	0.287582	1.04101	4.27434	0.195852	0.610162	0.475924	1	1	14.4774	1.10767	1.40131	1.09361	0.667132	0.893714	0.356007	1	0	0	1	1	0	0	1	0	0	0	0	0	0	0	0	0	0	0	0	1	0	0
FBtr0072048	0.900296	1	1.64445	1	0.0952419	1	2.56884	1	0.111381	0.0121671	0.0946568	0.00409137	0.134283	1	0.130242	0.473204	1	1	1	0.570779	1.08791	0.590664	1.13622	0.765199	0.81025	0	0	0	0	0	0	1	0	1	0	0	0	0	0	0	0	0	1	0	0	1	0	0	0
FBtr0072049	2.80512	3.63209	2.25384	1.57399	1.268	1.29024	1.18269	0.734409	1.18862	0.888365	0.529308	0.60178	0.756123	0.573918	0.775863	1.00672	1.10602	0.177837	1.14316	103.492	0.539263	2.84044	0.540641	0.775299	0.418998	0.699941	0	0	0	0	0	0	0	0	0	0	0	0	0	0	0	0	0	0	0	0	0	0	0
FBtr0072050	0.125057	42.4391	1	4.7779	1.03168	2.39152	0.218971	0.591924	1.07907	0.701577	0.501372	0.410784	0.918452	3.46827	0.826403	0.994338	0.242928	1	8.71052	0.975901	1.75496	2.24442	0.655911	1.95087	0.823099	1.59358	0	0	0	0	0	1	0	1	0	1	0	1	0	0	0	0	0	0	0	0	1	0	0
FBtr0072052	1.02779	1	0.0679015	0.246489	0.577192	0.563423	0.307471	0.462966	0.37648	0.16205	0.148807	0.177129	2.25644	1.18835	0.265986	0.329575	2.96692	1	1	1.35829	1.08209	0.690442	0.83376	0.735796	0.831332	0.557493	0	0	0	0	0	0	0	0	0	0	0	0	0	0	0	0	0	0	0	0	0	0	0
FBtr0072056	1	1	0.222131	0.0384331	1	0.091587	1	1	0.0129749	0.0898201	0.335362	0.030522	0.137605	1	0.208398	0.084368	0.0844805	1	1	0.0420301	0.87683	1.10685	0.765398	1.29242	0.482829	1.01455	0	0	0	0	0	0	0	0	0	0	0	0	0	0	0	0	0	0	0	0	0	0	0
FBtr0072057	0.276872	1	10.2563	1	1.03537	0.706727	0.865052	0.719161	0.844933	5.28251	0.253221	1.02925	1.89334	1.06861	0.536877	1.26853	1.22333	1.26253	1.38242	1.72966	1.61242	0.901821	1.74397	1.10832	1.53659	0.193596	0	0	0	0	3	0	0	3	3	0	0	3	4	0	0	4	3	2	1	4	3	2	2
FBtr0072058	1.42955	1.08999	0.843941	0.807125	0.874519	0.882761	0.660533	0.425767	0.519169	0.646363	0.510824	0.447572	0.291222	0.410464	0.50778	0.52126	0.474488	0.512645	0.426269	0.458501	0.500031	0.374027	0.424345	0.362353	0.348697	0.346279	4	3	3	4	4	3	3	4	3	3	3	3	3	3	3	3	2	3	2	3	3	3	3
FBtr0072059	0.0624729	0.0578875	0.552086	1	0.139372	0.05784	0.118984	10.2554	0.0695701	0.0206079	0.0158022	1	0.0155327	1	0.050854	1	1	1	0.136356	1	1.46477	1.86723	1.23433	1.9559	1.03073	1.74535	0	0	0	0	0	0	0	0	0	0	0	0	0	0	0	0	0	0	0	0	0	0	0
FBtr0072060	0.400193	0.192355	1.05167	0.769721	1.92351	1.94077	1.54419	1.60705	0.801141	0.770448	0.811351	0.878627	0.968127	0.825994	0.792636	0.9294	1.56839	1.58807	1.27653	1.09249	0.412608	0.485423	0.509674	0.619525	0.535246	0.704708	0	0	0	0	0	0	0	0	0	0	0	0	0	0	0	0	0	0	0	0	0	0	0
FBtr0072061	1.59689	1.14925	1.7935	0.896617	1.38646	1.40876	1.28584	1.38287	0.829333	1.01831	0.878173	0.749933	4.02729	1.19511	1.24582	1.30658	1.40679	1.04284	1.49701	0.869513	0.567128	0.204359	0.296799	0.239748	0.149145	0.197579	0	0	0	0	0	0	0	0	0	0	0	0	0	0	0	0	0	0	0	0	0	0	0
FBtr0072062	1.13298	1.57577	1.26741	1.42657	1.37423	0.936995	0.652461	0.327699	0.660705	0.92917	0.769945	0.865287	0.956331	0.847777	1.0614	1.12548	1.36314	1.03133	1.01798	1.08473	0.261889	0.334466	0.328633	0.440895	0.28782	0.527961	0	0	0	0	0	0	0	0	0	0	0	0	0	0	0	0	0	1	0	1	0	0	0
FBtr0072063	0.121033	0.143602	0.54593	0.192165	0.347683	0.311728	0.361596	0.229595	1.14554	0.0752517	0.0585493	0.0194051	0.242818	0.192661	0.170879	0.082506	0.190698	0.0883257	6.97739	0.0798535	2.08391	0.629121	0.912702	0.653994	0.505685	0.323717	0	0	0	0	1	0	0	1	0	1	0	1	1	1	1	1	1	1	1	1	0	0	0
FBtr0072064	0.0924214	0.153992	0.315224	0.552614	0.654372	0.73299	0.512612	0.485654	0.490341	0.615303	0.36083	0.516607	0.515458	0.857127	0.541623	0.557069	0.594783	0.510799	0.64246	0.556831	0.364995	0.327214	0.480584	0.382588	0.620538	0.502635	0	0	0	0	0	0	0	0	0	0	0	0	0	1	0	1	0	0	0	0	0	1	0
FBtr0072065	0.076227	0.0362678	0.140287	0.131457	0.218678	1	0.135213	1	0.026205	0.0914207	0.0542097	0.0365576	0.154231	1	0.0689007	0.134495	1	0.0439181	0.0799479	0.159956	1.47583	1.21453	0.646978	1.25338	0.409962	0.978644	0	0	0	0	0	0	0	0	0	0	0	0	0	0	0	0	0	0	0	0	0	0	0
FBtr0072071	0.149722	41.0578	0.258278	1.34302	0.229954	1.88339	0.142973	1.55722	0.000876221	0.8336	0.0625266	3.30426	0.710591	7.51425	0.122082	2.94554	1	2.73197	0.0443032	2.76761	1.19239	1.85782	0.692915	1.92739	0.295468	1.72184	0	0	0	0	0	0	0	0	0	0	0	0	0	0	0	0	0	0	0	0	0	0	0
FBtr0072073	0.941255	0.571775	1.23309	1.30255	0.339791	0.214876	0.237731	0.139491	0.673867	0.668363	0.50672	0.743293	0.30328	0.922278	0.976886	1.13192	0.668183	0.650021	0.569389	0.753775	0.502572	0.508439	0.575738	0.691338	0.6947	0.953895	4	5	3	6	5	6	5	6	0	1	0	1	2	2	2	2	0	3	0	3	5	3	3
FBtr0072083	0.370808	0.316685	0.713232	0.604343	0.890748	0.915001	0.509805	0.425471	0.208068	0.268117	0.203387	0.372961	0.177125	0.151243	0.182917	0.237245	0.40427	0.379841	0.465853	0.415781	0.586403	0.529216	0.575898	0.498344	0.36739	0.462558	0	0	0	0	0	0	0	0	0	0	0	0	0	0	0	0	0	0	0	0	0	0	0
FBtr0072084	0.264904	0.504736	1.2512	1.86492	1.79945	1.98038	1.39683	2.76667	1.07405	1.02736	0.773759	0.817686	1.39955	0.863396	1.16901	1.22836	2.36992	2.33479	1.51031	1.48242	0.434588	0.492243	0.484729	0.571844	0.552975	0.527973	0	1	0	1	1	1	1	1	1	1	1	1	1	1	1	1	1	1	1	1	1	1	1
FBtr0072085	0.551677	0.228103	0.520701	0.429296	0.925141	0.450972	0.744954	0.366273	0.470751	0.433544	0.46181	0.251045	0.338017	0.47263	0.370886	0.498374	0.365028	0.392539	0.346949	0.457765	0.375644	0.230496	0.301234	0.271677	0.274202	0.272217	1	1	1	1	1	1	1	1	1	1	1	1	1	1	1	1	1	1	1	1	1	1	1
FBtr0072087	0.19067	0.117326	0.185152	0.510768	0.656157	0.781669	0.49823	0.25836	0.412806	0.459034	0.288389	0.529738	0.774501	0.808409	0.567151	0.484088	0.45985	0.467272	0.46764	0.42363	0.424929	0.428173	0.500348	0.522071	0.611232	0.701493	1	1	1	2	2	3	1	4	3	5	2	6	3	4	2	5	3	5	2	6	5	5	4
FBtr0072088	1	4.29046	13.8009	0.338755	0.543701	2.80068	1.66759	1.79474	1.14902	22.0014	0.396755	0.0493083	1	0.0381827	1	0.0841453	10.7265	0.166703	1	0.0214661	1.49568	2.14707	1.70235	1.60652	1.50056	0.721873	0	0	0	0	0	0	0	0	0	0	0	0	0	0	0	0	0	0	0	0	0	0	0
FBtr0072089	1	91.4531	8.37267	4.1418	1	1323.77	0.66869	2.21638	1	2.86333	13.8223	1	1	1	1	1	1	1	1	0.156379	1.49511	2.91116	1.28377	2.24483	1.35665	1.82029	0	0	0	0	0	0	0	0	0	0	0	0	0	0	0	0	0	0	0	0	0	0	0
FBtr0072090	1	11.1351	1.56673	0.229139	1	551.189	1.4798	3.99932	1.75613	13.1606	0.638055	1.4331	1	38.4497	1.57542	1.6019	6.60199	1	1	70.5631	0.986088	2.46569	0.343667	2.2986	0.241103	1.92795	0	0	0	0	0	0	0	0	0	0	0	0	0	0	0	0	0	0	0	0	0	0	0
FBtr0072091	1.14354	1.08362	0.849862	0.817788	0.709931	0.893739	0.845511	0.877018	0.501069	0.865901	0.791776	0.514658	2.47589	1.3041	0.970418	0.949238	1.56228	1.42599	1.47638	1.21466	0.508848	0.268611	0.259844	0.219342	0.20606	0.12537	0	0	0	0	0	0	0	0	0	0	0	0	0	0	0	0	0	0	0	0	0	0	0
FBtr0072094	1	1	1	1	1	1	0.321871	0.0601133	0.00690889	0.0277817	0.0569308	0.0212637	0.637189	0.635779	0.221228	0.226099	1	1	1	3.52046	0.688404	1.21901	0.866865	1.01884	0.408281	0.614282	0	0	0	0	0	0	0	0	0	0	0	0	0	0	0	0	0	0	0	0	0	0	0
FBtr0072095	0.562796	0.370982	0.306229	0.307773	0.725431	0.563482	0.889826	0.46364	0.32028	0.382329	0.409645	0.354579	0.327418	0.315335	0.366401	0.264666	0.583137	0.295966	0.556934	0.202986	0.386323	0.291343	0.439444	0.225636	0.400531	0.261536	0	0	0	0	0	0	0	0	0	0	0	0	0	0	0	0	0	0	0	0	0	0	0
FBtr0072097	2.08797	1.65892	1.34741	1.33796	0.845929	0.878501	0.784131	0.619584	0.862334	0.864799	0.29874	1.13664	0.394284	0.543972	0.709295	0.880769	0.724039	1.05804	0.795313	0.55533	0.574037	0.374329	0.590389	0.346499	0.476188	0.413141	2	2	2	2	2	2	2	2	1	2	1	2	1	2	1	2	2	2	2	2	1	1	1
FBtr0072099	0.0287661	0.0634867	0.367382	0.442249	0.555776	0.661251	0.437612	0.262585	0.297685	0.345189	0.177242	0.203899	0.182945	0.474689	0.12855	0.158626	0.318695	0.216411	0.287059	0.287867	0.557424	0.561586	0.60522	0.627387	0.651123	0.71318	0	0	0	0	2	2	2	2	1	2	1	2	1	1	1	1	0	1	0	1	2	2	2
FBtr0072100	1.04602	11.5621	0.886012	0.449286	0.644588	0.741697	1.21223	0.863613	0.644853	1.35024	0.535375	2.32403	1.58641	0.90303	0.877143	0.674625	0.649505	0.632149	0.543918	0.571712	0.392089	1.69444	0.320077	1.49311	0.255217	1.59845	0	0	0	0	0	0	0	0	0	0	0	0	0	0	0	0	0	0	0	0	0	0	0
FBtr0072109	0.141656	1	1	1	0.122761	2.03702	0.135213	2.25157	0.216818	0.431003	0.00109395	2.37155	0.460977	18.1362	0.836157	1.22905	0.0500881	50.9497	0.0416384	3.00647	1.16944	1.92843	1.35211	0.53244	1.2388	0.423904	0	0	0	0	0	0	0	0	0	0	0	0	0	0	0	0	0	0	0	0	0	0	0
FBtr0072111	0.124632	0.351167	0.408245	0.469115	0.694341	0.715572	0.46374	0.55298	0.2131	0.426042	0.245987	0.334948	0.255191	0.322896	0.197091	0.338462	0.337409	0.400441	0.376322	0.389366	0.497643	0.285649	0.578455	0.29973	0.553967	0.293369	0	0	0	0	0	0	0	0	0	0	0	0	0	0	0	0	0	0	0	0	0	0	0
FBtr0072112	1.43833	1.14498	0.755157	0.801965	0.673214	0.446412	0.341277	0.284119	0.54344	0.70689	0.356657	0.379738	0.48743	0.775414	0.539702	0.676558	0.523834	0.37629	0.475855	0.330944	0.514678	0.463912	0.590951	0.512375	0.574092	0.57338	3	3	2	4	3	3	2	4	2	3	2	4	3	3	2	4	0	3	0	3	2	3	2
FBtr0072114	0.913159	0.7126	0.879086	0.951765	1.1508	0.650832	1.02285	0.784064	0.819355	0.394646	0.396532	1.41186	1.15954	0.720887	0.491097	1.05626	0.833471	0.906799	0.799457	0.667855	0.294428	0.334347	0.297764	0.420131	0.123712	0.167681	0	0	0	0	0	0	0	0	0	0	0	0	0	0	0	0	0	0	0	0	0	0	0
FBtr0072115	0.248221	11.5415	0.212967	0.137767	1.03365	0.166073	0.466701	3.85317	2.41002	1	0.061362	0.0929274	1	1	0.363159	1	1	1	1	0.147721	0.882399	1.77216	1.19998	1.61483	0.773203	1.36811	0	0	0	0	0	0	0	0	0	0	0	0	0	0	0	0	0	0	0	0	0	0	0
FBtr0072116	0.44128	1	0.206544	0.0954019	0.196689	0.389467	0.237145	0.259832	0.0555572	0.0573033	0.0348149	0.120379	0.430107	1	0.638079	4.89797	0.201499	1	0.0941731	1	0.760966	1.46358	0.75123	1.10802	0.426033	0.904853	0	0	0	0	0	0	0	0	0	0	0	0	0	0	0	0	0	0	0	0	0	0	0
FBtr0072117	0.327147	1.11421	0.441103	0.234257	0.565305	0.781218	0.509469	0.203511	0.343723	0.252558	0.272722	0.967798	0.506117	0.43224	0.155965	0.197173	0.342299	0.27196	0.355396	0.335531	0.324852	0.718385	0.27833	0.693647	0.222539	0.758417	1	0	0	1	1	1	1	1	1	1	1	1	1	1	1	1	1	1	1	1	1	1	1
FBtr0072120	1.91462	1.37	0.784383	0.83993	0.478399	0.356368	0.46791	0.393944	0.326285	0.529332	0.240439	0.499178	0.486895	0.749991	0.427445	0.634267	0.537981	0.641821	0.495112	0.462839	0.775507	0.457045	0.886446	0.579569	0.751404	0.640386	1	1	1	1	1	1	1	1	1	1	1	1	1	1	1	1	0	1	0	1	1	1	1
FBtr0072121	0.262057	0.109836	1	1	0.130859	0.0394716	1.07655	1	0.225373	0.236547	0.121154	0.499717	1.56156	1.85778	1.01861	1.154	1.79135	0.0828542	0.448104	161.168	0.800893	3.03677	0.947422	0.897502	0.793635	0.995708	0	0	0	0	0	0	0	0	0	0	0	0	0	0	0	0	0	0	0	0	0	0	0
FBtr0072122	1	1	1	1	0.205492	1	0.126247	1	0.00233005	0.0339416	0.108068	0.0288611	0.474908	15.7314	0.34323	0.249559	5.27592	1	0.0386003	61.8082	1.86015	2.34122	1.13965	0.738679	0.828002	0	0	0	0	0	0	0	0	0	0	0	0	0	0	0	0	0	0	0	0	0	0	0	0
FBtr0072123	0.127307	1	0.302025	4.86502	0.270655	0.127582	0.121424	0.0510981	0.021846	0.0283617	0.0449406	0.0264026	0.352436	1.21553	0.183063	0.17653	0.853852	0.0381863	0.169004	3.78339	0.977473	1.55133	0.778693	1.89198	0.459791	1.5071	0	0	0	0	0	0	0	0	0	0	0	0	0	0	0	0	0	0	0	0	0	0	0
FBtr0072124	1.06855	1.13666	0.894262	0.970671	0.965627	0.617345	0.764964	0.703127	0.706146	0.840589	0.592415	0.651188	0.714856	0.849664	0.695014	0.79804	0.81515	0.807154	0.673289	0.920917	0.186513	0.187371	0.211909	0.247932	0.138131	0.279612	0	0	0	0	0	0	0	0	0	0	0	0	0	0	0	0	0	0	0	0	0	0	0
FBtr0072127	0.466065	3.11133	0.46316	0.602275	1.04963	0.871108	1.04191	0.72456	0.458001	0.668465	0.590455	0.504298	1.60896	1.19056	0.664233	0.643264	0.871384	0.87766	0.911301	0.774896	0.448554	0.769324	0.42616	0.927974	0.444321	0.899866	1	2	1	2	1	2	1	2	1	2	1	2	1	2	1	2	1	2	1	2	1	2	1
FBtr0072128	0.679585	0.496169	1.59744	0.822884	1.33087	1.63161	1.25013	1.74503	0.597326	0.641062	0.38179	0.450344	1.37795	0.79752	0.953465	0.752295	1.3682	1.35957	1.1695	1.32932	0.373017	0.47139	0.497562	0.597864	0.318039	0.520072	0	0	0	0	0	0	0	0	0	0	0	0	0	0	0	0	0	0	0	0	0	0	0
FBtr0072129	0.0736703	0.0780712	0.818186	0.911829	0.798515	0.582331	1.16338	0.61795	0.575651	0.903118	0.567437	1.31449	0.452599	0.747156	0.383727	0.44518	0.594007	0.605161	0.585243	0.553094	0.480716	0.484002	0.544101	0.565819	0.642303	0.632023	1	1	1	1	4	3	3	4	4	4	4	4	4	3	3	4	3	4	3	4	4	4	4
FBtr0072131	0.510705	72.6589	0.374127	0.313254	0.421685	0.806932	0.880984	0.96779	0.667282	1.57815	0.261666	0.405115	1.10538	0.739632	0.798781	0.483783	0.482279	0.668932	0.46035	0.429632	0.439033	2.87849	0.430302	2.2938	0.420242	1.92557	0	0	0	0	0	1	0	1	0	1	0	1	1	1	1	1	1	1	1	1	0	0	0
FBtr0072132	0.343001	0.186976	0.450509	0.970671	1.5157	1.14738	1.18359	0.945391	0.923494	0.874817	1.04144	0.696937	0.560022	0.870374	0.524318	0.551842	1.3028	0.827967	0.998077	0.640111	0.448945	0.3478	0.489629	0.417475	0.650836	0.525046	0	1	0	1	0	1	0	1	0	1	0	1	0	0	0	0	0	1	0	1	0	0	0
FBtr0072133	0.23445	0.131845	0.30165	0.429251	0.770251	0.937728	0.59616	8.14486	0.917591	0.755474	0.40368	0.210631	0.0645683	0.0081025	0.467455	0.579177	0.663055	1	0.156699	1	0.60641	1.83802	0.504548	1.77528	0.528787	1.59154	1	0	0	1	0	0	0	0	0	0	0	0	0	0	0	0	0	0	0	0	0	0	0
FBtr0072134	0.500247	0.349073	0.530323	0.986317	0.877207	1.08749	0.862921	0.643031	0.519695	0.600913	0.391496	0.345328	0.425164	0.727688	0.712376	0.501047	0.473981	0.598951	0.444461	0.550777	0.311274	0.379665	0.333636	0.467314	0.296362	0.439761	1	3	1	3	2	3	2	3	2	3	2	3	1	1	0	2	0	0	0	0	0	3	0
FBtr0072140	0.154377	2.20509	0.26519	0.400657	0.742444	0.641108	0.570708	0.311793	0.342813	0.29686	0.495592	0.497759	0.761133	0.847682	0.438369	0.486518	0.448452	0.486631	0.493773	0.450404	0.40602	0.85298	0.503153	1.01443	0.625872	0.998037	0	0	0	0	1	1	1	1	1	1	1	1	1	1	1	1	1	0	0	1	1	1	1
FBtr0072141	0.801474	1.05338	0.949796	0.806387	1.11822	1.68679	1.27295	1.53053	0.829596	1.06245	0.87013	0.85336	1.14313	1.02103	1.11698	1.19683	1.11919	1.08628	1.4526	1.28566	0.193541	0.240197	0.190572	0.310448	0.197371	0.322747	0	0	0	0	0	0	0	0	0	0	0	0	0	0	0	0	0	0	0	0	0	0	0
FBtr0072143	0.840974	6.37759	2.03795	2.49014	2.79389	2.82073	1.68015	2.28758	1.37027	0.737912	1.15435	0.840062	1.46893	0.889575	1.27814	0.917051	1.68038	2.00298	1.19196	1.28176	0.354713	0.822926	0.424184	0.790426	0.441129	0.553778	1	3	0	4	3	1	0	4	1	2	0	3	2	2	0	4	1	1	0	2	1	1	0
FBtr0072145	0.351386	0.402652	0.808957	0.833016	0.998015	0.948229	1.04891	1.29169	0.862699	0.738358	0.528493	0.527449	1.06891	1.02779	0.539563	0.446351	1.03677	0.977185	0.957463	0.755528	0.31407	0.353586	0.356557	0.400256	0.396022	0.422192	2	3	2	3	2	3	2	3	3	3	3	3	3	3	3	3	3	3	3	3	2	2	2
FBtr0072146	0.146772	0.0442129	0.00848001	0.0196181	0.00874719	0.00574405	0.015157	0.0105248	0.0194692	0.0562196	0.0366543	0.0133977	0.101358	0.388746	0.148948	0.113318	0.0149724	0.0409938	0.0108401	0.0999464	1.13442	1.44821	1.36935	0.818894	1.51954	0.855	0	0	0	0	0	0	0	0	0	0	0	0	0	0	0	0	0	0	0	0	0	0	0
FBtr0072147	1.86129	1.98711	1.40368	1.89495	1.3541	0.911622	0.797455	0.503718	1.21671	1.10738	1.40306	0.828057	1.15284	1.42428	1.22389	0.816625	1.82557	1.27196	1.9398	1.6284	0.254624	0.398589	0.256366	0.500104	0.32177	0.552921	0	0	0	0	0	0	0	0	0	0	0	0	0	0	0	0	0	0	0	0	0	0	0
FBtr0072150	0.405398	88.9178	1.12205	0.472515	1.14408	2.99536	1.57191	1.54997	1.81267	1.0842	0.910881	1.29599	2.18192	0.749214	1.61236	1.10519	2.42108	2.18117	3.99997	1.8336	0.582553	2.70703	0.426939	2.22433	0.455814	1.85807	0	0	0	0	0	0	0	0	0	0	0	0	0	0	0	0	0	0	0	0	0	0	0
FBtr0072151	0.100557	0.127591	0.348281	0.62941	0.905616	0.784796	1.00181	0.653691	0.563409	0.729103	0.474337	0.906142	1.16572	1.07807	0.807585	0.691842	0.390325	0.292665	0.288072	0.282091	0.57536	0.483058	0.600912	0.421784	0.738136	0.526586	0	0	0	0	0	0	0	0	0	0	0	0	0	0	0	0	0	0	0	0	0	0	0
FBtr0072152	1.56321	2.68918	2.54989	2.35229	1.62366	2.07672	1.18494	1.62766	0.980306	0.971447	0.852146	1.15554	1.12867	1.24222	1.27675	1.51431	2.42	3.41812	1.85643	2.25238	0.377304	0.399505	0.422562	0.374507	0.33505	0.205307	0	0	0	0	0	0	0	0	0	0	0	0	0	0	0	0	0	0	0	0	0	0	0
FBtr0072154	0.427409	0.138925	0.607681	0.670698	1.05911	0.913859	0.80846	0.454042	0.463586	0.522076	0.497456	0.488324	0.366491	0.343004	0.380664	0.369614	0.520844	0.519008	0.46767	0.518699	0.387439	0.413632	0.381411	0.48179	0.373956	0.604637	2	3	2	3	3	4	3	4	2	4	2	4	3	4	3	4	2	4	2	4	3	4	3
FBtr0072156	0.853962	0.296624	0.90521	0.798036	0.950436	0.764631	0.610025	0.533943	0.563797	0.572312	0.466971	0.484271	0.536612	0.582631	0.411302	0.440575	1.07898	0.737034	0.685987	0.733288	0.321097	0.274086	0.279748	0.323629	0.182905	0.389245	1	1	1	1	1	1	1	1	1	1	1	1	1	1	1	1	1	1	1	1	1	1	1
FBtr0072157	0.225433	2.37971	0.392846	0.707357	0.767391	0.975873	0.841837	0.193046	0.650289	0.453536	0.516526	1.72428	1.47298	1.02283	0.890093	0.598222	0.507988	0.473033	0.460634	0.398971	0.519929	0.760677	0.41241	0.772726	0.530961	0.879088	6	7	5	9	9	8	8	9	9	8	8	9	9	8	8	9	9	8	8	9	9	8	8
FBtr0072159	0.12166	1	1	1	1	1	0.080446	1	0.0376061	0.0368063	0.0227409	0.00845135	0.0485399	0.0711892	0.136282	0.229429	0.12357	1	0.035182	14.1595	1.5034	2.21176	1.28291	0.748717	0.943243	0	0	0	0	0	0	0	0	0	0	0	0	0	0	0	0	0	0	0	0	0	0	0	0
FBtr0072160	0.219486	5.23146	0.455904	0.762488	0.664337	0.8816	0.898767	0.596843	0.520162	0.277113	0.3189	0.188826	0.61654	0.558409	0.455855	0.0221046	0.915716	0.813118	0.724259	0.75625	0.397242	1.49835	0.47664	1.46141	0.518343	1.20191	1	0	0	1	0	1	0	1	1	0	0	1	1	1	1	1	0	0	0	0	0	1	0
FBtr0072161	0.148299	0.572179	0.104873	0.0880914	0.21623	0.383076	0.355335	0.0603656	0.173261	0.264396	0.152233	0.194945	0.584561	1.44141	0.360573	0.452844	1	1	0.0378057	3.09255	0.921769	1.22832	0.45891	0.740887	0.53101	0.890178	0	0	0	0	0	0	0	0	0	0	0	0	0	0	0	0	0	0	0	0	1	0	0
FBtr0072162	0.0944898	0.209106	0.143137	0.205834	0.255821	0.236626	0.253513	0.223062	0.124507	0.140003	0.196057	0.144992	0.198068	0.166234	0.254149	0.137928	0.293467	0.296426	0.28062	0.206325	0.331465	0.256138	0.382317	0.211367	0.433307	0.0645659	3	1	1	3	3	3	3	3	3	3	3	3	3	2	2	3	1	1	1	1	1	1	1
FBtr0072163	0.781048	0.656852	0.900947	1.27036	1.21153	1.9546	1.27712	2.08663	0.548736	0.940861	0.579292	0.960664	0.657195	0.525841	1.09459	0.956395	1.06764	1.16833	1.10205	1.19881	0.289348	0.430129	0.350098	0.445216	0.229653	0.443573	1	1	1	1	1	1	1	1	1	1	1	1	1	1	1	1	1	1	1	1	1	1	1
FBtr0072164	0.684881	0.572198	1.15837	0.597976	1.20137	1.15246	1.57071	2.2819	1.80878	6.43897	0.817641	1.85132	3.12008	1.35535	1.86771	1.52102	1.98348	2.7582	2.34634	2.54045	0.445725	0.805538	0.355598	1.02779	0.314871	0.694928	0	0	0	0	0	0	0	0	0	0	0	0	0	0	0	0	0	0	0	0	0	0	0
FBtr0072165	1.39508	2.20688	1.96231	2.25337	2.41598	1.90237	1.83618	0.991826	1.68698	1.25894	1.18498	1.60737	1.76572	1.16678	1.77474	1.14	1.67752	1.7856	1.33907	1.53594	0.205082	0.282829	0.248884	0.300327	0.220758	0.318497	0	0	0	0	0	0	0	0	0	0	0	0	0	0	0	0	0	0	0	0	0	0	0
FBtr0072166	1.46729	1.74384	1.03658	1.18769	0.628583	0.324356	0.30846	0.247968	0.539937	0.647497	0.469266	0.575246	0.218906	0.360891	0.27729	0.402716	0.643413	0.73918	0.627419	0.629364	0.610509	0.669743	0.581126	0.728113	0.584231	0.820321	3	4	3	4	4	3	3	4	2	2	2	2	2	3	2	3	3	3	3	3	3	2	2
FBtr0072168	0.260482	0.28602	0.283358	0.566675	1.00543	0.673653	1.04787	0.543593	0.616394	0.613061	0.572668	0.449867	0.482508	0.81796	0.576111	0.39891	0.6089	0.433129	0.619559	0.560362	0.423651	0.28262	0.53774	0.263491	0.671797	0.317658	2	2	2	2	2	2	2	2	2	2	2	2	2	2	2	2	2	2	2	2	2	2	2
FBtr0072169	0.231259	0.574497	0.313008	0.495155	0.72455	0.487917	0.928658	0.805014	0.403892	0.263132	0.411452	0.345714	0.457001	0.503518	0.762416	0.292598	1.11017	0.933159	0.848703	0.750324	0.475866	0.410956	0.533191	0.381552	0.605186	0.250905	0	0	0	0	0	0	0	0	0	0	0	0	0	0	0	0	0	0	0	0	0	0	0
FBtr0072172	1.10699	1.72845	1.09032	1.05025	0.960436	1.15749	0.722487	0.671646	0.483985	0.378854	0.407009	0.45083	0.415065	0.319251	0.532013	0.64804	0.817985	0.779103	0.810001	0.83879	0.363637	0.529531	0.383269	0.562749	0.183055	0.379523	0	0	0	0	0	0	0	0	0	0	0	0	0	0	0	0	0	0	0	0	0	0	0
FBtr0072174	0.124521	0.196879	0.220682	0.24252	0.478656	0.721206	0.432408	0.320512	0.157442	0.117327	0.17104	0.177499	0.233957	0.126981	0.168835	0.164271	0.284595	0.159341	0.21634	0.171137	0.475711	0.74688	0.576096	0.740271	0.538289	0.646689	0	0	0	0	0	0	0	0	0	0	0	0	0	0	0	0	0	0	0	0	0	0	0
FBtr0072177	2.38521	3.27499	2.70036	3.1846	2.34334	2.19339	1.31276	1.52228	1.47168	0.80514	0.915614	1.15108	1.0364	0.614832	0.653222	0.698511	1.46009	1.36417	0.930244	1.07131	0.46837	0.616451	0.385594	0.515882	0.27601	0.329803	2	2	2	2	2	2	2	2	2	2	2	2	2	2	2	2	2	2	2	2	2	2	2
FBtr0072185	0.314238	0.354887	1.07489	0.42547	1.46968	1.18499	0.976353	0.439191	0.359834	0.278316	0.522518	0.411576	0.574482	0.259433	0.448975	0.323045	0.787904	0.387034	1.0224	0.458709	0.49656	0.588404	0.585804	0.646	0.500285	0.650414	0	0	0	0	0	0	0	0	0	0	0	0	0	0	0	0	0	0	0	0	0	0	0
FBtr0072187	0.729623	1.48471	1.56459	2.74844	2.35364	3.14182	1.94937	3.29533	1.66143	1.25427	1.21886	1.61858	1.89766	1.2694	2.25956	1.32387	2.47322	2.81212	2.14794	1.79372	0.298652	0.398427	0.357605	0.401767	0.419939	0.307965	0	0	0	0	0	0	0	0	0	0	0	0	0	0	0	0	0	0	0	0	0	0	0
FBtr0072188	2.12345	2.54999	3.56626	2.39959	2.34122	1.75913	1.67338	2.75168	1.9946	1.14562	1.52445	1.48109	1.94354	0.936019	2.22377	1.53537	2.82742	2.42691	2.53963	2.17691	0.261453	0.328938	0.331467	0.320411	0.333623	0.181372	0	0	0	0	0	0	0	0	0	0	0	0	0	0	0	0	0	0	0	0	0	0	0
FBtr0072190	1.20284	1.54535	1.52333	2.7296	1.79688	3.45754	1.4557	1.71816	1.00969	1.42849	0.71199	1.42038	1.10073	1.4929	1.44066	1.61099	1.76929	2.71594	1.4845	1.93693	0.253056	0.353741	0.303545	0.413386	0.163347	0.379888	0	0	0	0	0	0	0	0	0	0	0	0	0	0	0	0	0	0	0	0	0	0	0
FBtr0072192	1.1451	0.79627	0.699786	0.600623	0.480342	0.392575	0.436648	0.238349	0.505273	0.604343	0.541364	0.584811	0.551144	0.657838	0.471053	0.58534	0.552184	0.729517	0.539475	0.595376	0.349172	0.275326	0.418753	0.361789	0.469565	0.480093	0	0	0	0	0	0	0	0	0	0	0	0	0	0	0	0	0	0	0	0	0	0	0
FBtr0072193	0.81711	93.7322	4.18803	0.300719	3.10074	2.55353	2.19367	4.28207	1.4614	0.695286	1.55688	0.733999	4.00875	0.836356	2.19508	0.457749	1.81589	1.94312	1.58389	1.40039	0.489909	2.73081	0.556642	2.20513	0.55442	1.81249	0	0	0	0	0	0	0	0	0	0	0	0	0	0	0	0	0	0	0	0	0	0	0
FBtr0072194	2.25968	2.48661	2.96967	1.96268	2.60028	3.02949	2.02884	2.2571	2.66215	1.13169	1.06627	1.40462	2.34854	1.33709	1.34721	1.46448	2.71451	2.58863	2.14348	2.76221	0.273479	0.33079	0.296858	0.34295	0.166533	0.185387	0	0	0	0	0	0	0	0	0	0	0	0	0	0	0	0	0	0	0	0	0	0	0
FBtr0072195	0.583904	1.39389	0.668865	1.18306	0.724883	1.07145	0.711812	0.914776	0.719631	0.507275	0.384289	0.688252	1.01503	0.756402	0.735384	0.580462	1.11068	1.14293	0.968865	0.816424	0.282647	0.31692	0.209489	0.339631	0.0946577	0.176581	4	3	3	4	3	4	3	4	3	3	3	3	4	4	4	4	4	4	4	4	4	2	2
FBtr0072197	0.137122	43.0607	0.409272	1	0.605227	0.93053	0.558717	0.630396	0.272208	0.499269	0.526265	1.01862	0.355302	78.708	0.274605	52.9405	0.443815	0.604811	0.325417	33.0763	0.374848	1.35282	0.436815	2.19532	0.493274	1.85036	2	0	0	2	2	0	0	2	2	3	2	3	2	3	2	3	2	3	2	3	2	3	2
FBtr0072202	0.215328	0.265908	1.16244	1.05737	1.57687	1.58713	1.39966	1.57946	1.18073	0.966872	1.05651	0.951572	1.73834	0.951466	1.49614	0.936244	2.24862	2.03553	1.87556	1.72031	0.394586	0.428721	0.429298	0.458366	0.557074	0.554622	0	0	0	0	0	0	0	0	0	0	0	0	0	0	0	0	0	0	0	0	0	0	0
FBtr0072204	0.543127	0.337398	0.544983	0.31616	0.315001	0.247116	0.340294	0.221188	0.135734	0.152336	0.121078	0.193719	0.357443	0.261728	0.195717	0.161022	0.214573	0.280718	0.225518	0.183586	0.506613	0.271771	0.558441	0.291261	0.287647	0.196819	6	6	6	6	6	6	6	6	6	6	6	6	6	6	6	6	6	6	6	6	6	6	6
FBtr0072205	0.471841	1.22087	1.23472	1.62078	1.08927	1.15383	0.727024	1.02227	0.433471	0.717843	0.635778	0.601842	0.394544	0.583563	1.1055	1.06012	1.17809	1.5529	0.941038	1.06508	0.398383	0.336893	0.429303	0.348498	0.393118	0.205497	2	2	2	2	2	2	2	2	2	2	2	2	2	2	2	2	2	2	2	2	1	0	0
FBtr0072207	0.373056	0.220978	1.04662	0.538093	1.01783	0.742024	1.18644	1.3153	0.64661	0.585536	0.537647	0.441633	1.64825	0.682995	1.18911	0.786982	1.19596	1.163	1.21243	1.02419	0.379208	0.448415	0.407132	0.581885	0.400491	0.65392	2	2	2	2	3	3	3	3	2	2	2	2	2	3	2	3	3	2	2	3	3	2	2
FBtr0072208	0.960855	1.3257	0.828911	0.809946	1.52974	1.3912	1.39456	1.60359	0.667461	0.784143	0.768079	0.631317	0.949828	0.839176	0.903831	0.982781	1.37285	1.59044	1.32301	1.30804	0.285154	0.317473	0.34571	0.3649	0.285503	0.262507	0	2	0	2	0	2	0	2	0	2	0	2	1	2	1	2	0	2	0	2	1	2	1
FBtr0072209	0.0193628	19.8331	0.467402	1.00823	0.536962	1.49514	1.35095	2.63143	0.968299	0.606664	0.828074	1.66688	2.08134	1.24306	1.85667	1.10693	4.16623	3.42576	3.02454	2.92231	0.839046	1.60794	0.661057	1.657	0.934047	1.45567	0	0	0	0	0	0	0	0	0	0	0	0	0	0	0	0	0	0	0	0	0	0	0
FBtr0072210	1.10896	0.866759	1.46273	1.25813	1.12808	0.823776	0.599502	0.496279	1.03026	0.923469	0.972918	0.676043	0.80838	0.995619	0.678887	0.747063	1.84898	1.1448	1.34772	0.934417	0.344422	0.249585	0.26561	0.304549	0.331305	0.362344	1	1	1	1	1	1	1	1	1	1	1	1	1	1	1	1	1	1	1	1	1	1	1
FBtr0072211	0.796521	0.81931	0.544856	0.882763	1.34273	1.27781	1.54468	1.15662	1.66713	2.06799	1.06317	1.56323	1.76484	1.39101	1.64225	0.91169	0.729604	0.533978	0.672553	0.53083	0.398246	0.431214	0.377484	0.359842	0.440162	0.211449	0	0	0	0	0	0	0	0	0	0	0	0	0	0	0	0	0	0	0	0	0	0	0
FBtr0072219	0.0279582	0.0606539	0.234863	0.166446	0.918476	0.539466	0.610238	0.405452	0.463349	0.303147	0.565275	0.326731	0.26461	0.223119	0.402636	0.323336	0.685559	0.356797	0.813485	0.402545	0.552688	0.433509	0.659612	0.5657	0.883296	0.746151	0	0	0	0	0	0	0	0	0	1	0	1	0	1	0	1	0	0	0	0	0	1	0
FBtr0072220	0.121325	0.0660472	0.345354	0.175843	0.374216	0.434738	0.33116	0.492702	0.140205	0.255057	0.183421	0.215663	0.263768	0.41696	0.183326	0.251415	0.401807	0.335971	0.299558	0.253136	0.382815	0.450057	0.454389	0.590597	0.395382	0.698824	3	3	3	3	3	3	3	3	3	3	3	3	3	3	3	3	3	3	3	3	3	3	3
FBtr0072221	0.815073	0.712068	0.977607	0.691804	0.850478	0.557364	0.631822	0.408564	0.86838	0.885859	0.623837	0.726065	0.636803	0.565839	0.565585	0.597258	0.917802	0.690046	0.756279	0.744441	0.186547	0.198591	0.176324	0.245557	0.174445	0.237159	1	1	1	1	1	0	0	1	1	1	1	1	1	1	1	1	0	0	0	0	1	0	0
FBtr0072223	0.917214	0.213234	1.20494	1.09026	1.53665	1.61895	1.62086	1.43691	1.09429	1.00853	1.3854	1.12217	2.12012	1.58061	1.58099	1.58529	1.469	1.21583	1.49364	1.3193	0.228696	0.341972	0.208593	0.448375	0.24469	0.572739	0	0	0	0	0	0	0	0	0	0	0	0	0	0	0	0	0	0	0	0	0	0	0
FBtr0072224	0.589886	4.70579	0.275768	35.9214	1.74576	2.5154	1.56846	0.646045	0.486072	0.319425	0.627625	0.968441	6.03337	14.693	0.491854	0.0332707	0.75517	1.09557	0.584723	0.838028	1.31146	1.8365	0.697163	1.86505	0.690944	1.52843	0	0	0	0	0	0	0	0	1	3	1	3	3	2	2	3	1	0	0	1	0	1	0
FBtr0072225	0.448865	0.342145	0.705231	0.903446	1.17314	1.14748	1.13568	1.60369	0.44543	0.599199	0.544857	0.443155	0.678689	0.662528	0.739755	0.578032	0.956768	0.91391	0.839588	0.837682	0.339093	0.461636	0.448877	0.56982	0.40396	0.525872	1	2	1	2	1	2	1	2	1	2	1	2	1	2	1	2	1	1	0	2	1	2	1
FBtr0072226	1.17448	0.947396	1.46165	0.827076	0.957011	0.931184	1.57604	1.56458	1.85789	1.26534	1.15319	1.04464	2.34241	1.75183	1.54061	1.29292	1.33916	1.37498	1.58826	1.49887	0.263229	0.245107	0.242029	0.248863	0.216802	0.314372	0	1	0	1	0	1	0	1	0	1	0	1	0	1	0	1	0	1	0	1	0	1	0
FBtr0072227	0.172504	0.0714435	0.550017	0.318619	0.810654	0.604562	0.863686	0.584375	0.578348	0.424872	0.520826	0.662424	0.533705	0.536549	0.518608	0.519148	0.76864	0.66442	0.775855	0.531529	0.335209	0.368568	0.423247	0.501247	0.526992	0.638027	2	2	2	2	3	4	3	4	3	4	3	4	3	4	3	4	3	4	3	4	3	4	3
FBtr0072232	0.210614	2.54351	0.159927	0.688994	0.235721	1.26998	0.510739	0.909663	0.426293	0.245578	0.203203	0.0960418	0.441757	0.446751	0.246282	0.191883	0.384529	0.0997266	0.365019	1.54341	0.380977	0.983885	0.488257	0.925258	0.564055	0.612686	0	0	0	0	0	0	0	0	0	0	0	0	0	0	0	0	2	0	0	2	2	0	0
FBtr0072233	0.134856	0.249684	0.913548	0.466375	1.14522	0.626745	1.1933	0.656928	1.27162	0.89906	1.02197	0.953824	0.872078	0.457911	1.04393	0.842721	0.996667	1.11685	0.939547	0.703643	0.329656	0.376766	0.441012	0.411176	0.578751	0.373287	0	0	0	0	0	0	0	0	0	0	0	0	0	0	0	0	0	0	0	0	0	0	0
FBtr0072234	0.326616	0.1849	0.487264	0.157993	0.442415	0.25605	0.318007	0.0734583	0.328639	0.3051	0.445893	0.452349	0.380716	0.316185	0.229135	0.299307	0.120848	0.117785	0.126495	0.0739837	0.399955	0.549998	0.192127	0.553738	0.214379	0.448819	1	1	1	1	1	1	1	1	1	1	1	1	1	1	1	1	1	1	1	1	1	1	1
FBtr0072235	0.912929	0.812872	0.780272	1.24898	1.87087	1.83562	1.21592	2.10866	0.638157	0.959337	0.778951	1.00612	1.2201	1.54119	0.552724	1.11207	1.52737	1.68235	1.2124	1.45244	0.389	0.305313	0.440335	0.395168	0.406756	0.388	2	2	2	2	2	2	2	2	2	2	2	2	2	2	2	2	2	2	2	2	2	2	2
FBtr0072236	1.93268	1.16622	2.48423	1.38075	1.9313	1.98046	1.83481	1.20696	1.40064	0.753842	1.02401	1.22502	2.35129	1.18105	1.25412	1.00305	1.59829	1.6983	1.47387	1.58013	0.270237	0.269687	0.28391	0.31091	0.144634	0.262455	0	0	0	0	0	0	0	0	0	0	0	0	0	0	0	0	0	0	0	0	0	0	0
FBtr0072237	0.180858	0.479509	0.236048	1	0.397444	0.214632	0.775393	3.49652	0.63848	1	0.994997	5.13256	0.709474	4.29617	0.602766	5.55618	1.23093	4.22809	0.802248	3.81371	0.49619	0.696108	0.596709	1.04578	0.674841	1.15728	0	0	0	0	0	0	0	0	0	0	0	0	0	0	0	0	0	0	0	0	0	0	0
FBtr0072238	1	0.145916	1	1	1	0.145808	0.325066	0.111672	0.172355	0.104754	0.116267	0.664762	0.123138	0.118496	0.299866	0.658299	1	1	0.118037	4.75162	0.820714	1.62356	0.732227	1.04854	0.405967	1.23434	0	0	0	0	0	0	0	0	0	0	0	0	0	0	0	0	0	0	0	0	0	0	0
FBtr0072239	0.360614	7.25437	0.302829	0.257752	0.182597	0.905862	0.863208	0.76623	0.874089	0.793081	0.40846	0.83056	1.82851	1.2326	1.22862	0.558562	1.27146	1.30327	1.30801	0.931068	0.630854	1.38184	0.594436	1.48861	0.701849	1.44476	0	0	0	0	0	3	0	3	0	2	0	2	1	4	1	4	4	4	4	4	2	3	1
FBtr0072241	2.02949	2.19208	2.11738	1.96628	1.01119	1.06397	0.568077	1.44062	0.792674	1.21616	0.760761	0.919083	0.572063	0.587942	1.24223	0.91639	1.53121	1.88398	1.32787	1.35405	0.470407	0.384241	0.561732	0.347903	0.533556	0.306145	0	0	0	0	0	0	0	0	0	0	0	0	0	0	0	0	0	0	0	0	0	0	0
FBtr0072242	0.905568	0.726211	0.405666	0.79637	1.09149	0.952062	0.791954	0.886811	0.631457	0.802227	0.579355	0.713587	0.372598	0.604043	0.621232	0.672383	0.775338	0.719577	0.686198	1.02251	0.317549	0.165221	0.335172	0.113544	0.362648	0.1182	0	0	0	0	0	0	0	0	0	0	0	0	0	0	0	0	0	0	0	0	0	0	0
FBtr0072245	1	1	0.187124	1	0.164869	6.68264	0.0684881	0.056855	0.0970608	0.0688507	0.02372	0.0517437	0.906772	0.0605573	0.198431	0.20801	0.0692356	1	1	0.586792	1.12142	1.88137	1.43665	1.75509	1.21928	1.3874	0	0	0	0	0	0	0	0	0	0	0	0	0	0	0	0	0	0	0	0	0	0	0
FBtr0072246	1	1	1	11.295	1	17.9446	1	1	0.003084	0.00288666	0.0358023	0.0217652	0.0322996	0.0414441	0.179401	0.190276	1	1	1	1.10948	0.777851	1.83146	0.75238	1.45822	0	1.06516	0	0	0	0	0	0	0	0	0	0	0	0	0	0	0	0	0	0	0	0	0	0	0
FBtr0072247	0.198684	6.47545	0.974387	0.290588	0.911424	1.12078	1.38812	1.06725	0.733652	0.535962	1.11832	1.4834	1.99107	0.839767	0.919616	0.622732	1.19817	1.06729	1.20781	1.11768	0.433617	1.2278	0.453592	1.26657	0.568871	1.27316	2	3	2	3	5	0	0	5	0	5	0	5	7	6	6	7	7	5	5	7	7	7	7
FBtr0072249	1.60992	1.50167	1.29549	1.37576	0.948365	0.599435	0.663648	0.36705	1.81794	1.04977	1.03122	0.804332	1.1405	1.03793	1.23769	0.9933	0.937487	0.831937	0.802977	0.931758	0.310352	0.351732	0.351998	0.466066	0.364435	0.584921	1	1	1	1	1	1	1	1	1	1	1	1	1	1	1	1	1	0	0	1	0	1	0
FBtr0072250	1.49589	1.16284	0.894975	1.3578	0.863678	0.794071	0.602818	0.412445	0.844108	0.962854	0.626004	0.551687	0.582551	1.19462	0.993533	0.967185	0.666095	0.512469	0.685426	0.691642	0.332419	0.371921	0.363922	0.412301	0.391765	0.448336	2	2	2	2	2	2	2	2	2	2	2	2	2	2	2	2	2	2	2	2	2	2	2
FBtr0072251	0.105929	0.472577	0.175571	0.0587273	0.264179	0.304542	0.871245	0.392867	0.207168	0.183296	0.501283	0.223936	1.56243	0.227544	0.241265	0.163708	0.888343	0.717389	1.03273	0.588752	0.825261	0.621571	0.810596	0.547838	0.990052	0.583666	2	4	2	4	4	5	3	6	4	6	4	6	3	5	3	5	3	4	2	5	3	2	2
FBtr0072252	0.124915	0.191126	0.230467	0.132339	0.304007	0.368138	0.495449	0.246062	0.401047	0.223304	0.269335	0.419455	0.380728	0.550557	0.416393	0.300392	0.284538	0.306083	0.272865	0.222624	0.335892	0.415759	0.42798	0.414604	0.541031	0.428798	0	1	0	1	1	0	0	1	1	2	1	2	2	2	2	2	1	2	1	2	2	2	2
FBtr0072253	0.100742	0.481433	0.676728	0.639159	0.985964	1.03871	0.725678	0.706864	0.40656	0.341574	0.394256	0.295848	0.416205	0.290701	0.548329	0.436713	0.69574	0.431827	0.598133	0.456249	0.435256	0.44757	0.567202	0.470382	0.599795	0.327443	0	0	0	0	0	0	0	0	0	0	0	0	0	0	0	0	0	0	0	0	0	0	0
FBtr0072255	0.563051	1.49896	1.00676	0.525019	0.76053	1.25756	1.09706	1.86058	1.03667	0.701651	0.465284	1.58006	2.10608	0.906426	1.21958	1.10279	1.29815	1.97166	1.2611	1.78422	0.425699	0.380662	0.323853	0.422919	0.28249	0.438984	0	0	0	0	0	0	0	0	0	0	0	0	0	0	0	0	0	1	0	1	0	0	0
FBtr0072256	0.713919	1.20942	1.74988	1.78036	2.78314	2.89756	2.16966	2.25834	1.61803	1.93142	1.47781	1.45964	1.15779	1.33016	1.23996	1.31906	1.80455	2.0171	2.2461	2.00107	0.35372	0.285581	0.396123	0.312612	0.469513	0.351864	0	0	0	0	0	0	0	0	0	0	0	0	0	0	0	0	0	0	0	0	0	0	0
FBtr0072257	0.195091	0.634301	0.233823	0.137987	0.219151	0.400031	0.434422	0.301495	0.363092	0.493265	0.328759	0.240399	1.00687	0.544853	0.483867	0.414139	0.298096	0.220633	0.252168	0.296458	0.626415	0.425875	0.319691	0.488104	0.407806	0.563386	0	0	0	0	0	1	0	1	1	2	1	2	2	2	2	2	2	2	2	2	2	2	2
FBtr0072258	0.0644206	0.109874	0.426384	0.518297	1.28481	0.903033	0.958162	0.745483	0.874366	0.690848	0.800956	0.701816	0.271201	0.335014	0.389855	0.703171	0.694602	0.527593	0.777777	0.800226	0.55655	0.392322	0.583976	0.449425	0.795328	0.605309	0	0	0	0	0	0	0	0	0	0	0	0	0	0	0	0	0	0	0	0	0	0	0
FBtr0072260	0.797316	0.417328	0.80494	0.976027	0.626196	0.443396	0.326696	0.200134	0.484683	0.585705	0.436776	0.41557	0.281367	0.647497	0.738623	0.641864	0.383118	0.341918	0.445624	0.341347	0.366242	0.437773	0.3397	0.515584	0.350396	0.647572	7	6	5	8	7	5	4	8	4	6	3	7	3	4	3	5	4	6	3	8	7	5	4
FBtr0072261	3.52315	1.59383	1.50823	0.718618	0.74854	0.412067	1.20302	0.407464	1.05235	0.597825	0.913912	0.442386	1.2829	0.548876	1.11438	0.45888	1.18971	0.760899	1.09671	0.671763	0.576426	0.532293	0.689591	0.657268	0.701918	0.714977	0	0	0	0	0	0	0	0	0	0	0	0	0	0	0	0	0	0	0	0	0	0	0
FBtr0072262	0.175218	0.356198	0.182723	0.446864	1.02648	0.850847	0.890078	0.892611	0.61105	0.529825	0.425803	0.397862	0.646307	0.839113	0.49734	0.365081	0.73924	0.62354	0.693109	0.657415	0.470489	0.350771	0.646827	0.404713	0.797322	0.431194	0	0	0	0	0	1	0	1	0	1	0	1	1	1	1	1	0	0	0	0	1	1	1
FBtr0072263	0.288833	5.10348	0.818459	0.242511	0.566096	0.647721	1.25025	0.737827	0.568393	0.443318	0.622989	0.938013	1.57536	1.24113	1.29655	0.750662	0.730324	0.579023	0.699046	0.514816	0.476834	1.27363	0.47285	1.37069	0.558535	1.36109	0	0	0	0	1	0	0	1	0	1	0	1	2	2	2	2	0	1	0	1	1	1	1
FBtr0072264	0.20407	1	0.890306	0.0936173	0.174855	0.526794	0.685029	0.750654	0.273088	0.12743	0.190526	0.250421	0.124076	0.219439	0.40778	0.194458	0.207554	0.251383	0.661378	0.121289	0.703199	0.865453	0.761347	0.798564	0.727837	0.649201	0	0	0	0	0	0	0	0	0	0	0	0	0	0	0	0	0	0	0	0	0	0	0
FBtr0072268	0.128417	0.0964806	0.326709	0.142954	0.873644	0.781888	0.464821	0.25026	0.316157	0.922895	0.274358	0.54057	0.270951	0.31403	0.232089	0.212946	0.714246	0.604822	0.606069	0.594963	0.567018	0.634206	0.646977	0.760523	0.703238	0.993912	1	0	0	1	1	1	1	1	1	1	1	1	1	1	1	1	1	1	1	1	1	1	1
FBtr0072270	0.229498	3.02774	0.49018	0.733446	1.27839	1.11035	1.73556	0.345949	1.03682	0.720847	1.39111	0.571951	1.40792	1.89491	0.658387	1.45108	1.07408	1.17419	2.4162	2.91847	0.541629	0.677575	0.554647	0.9068	0.745952	0.912733	0	0	0	0	0	0	0	0	0	0	0	0	0	0	0	0	0	0	0	0	0	0	0
FBtr0072271	0.45612	0.212157	1.15096	0.763701	1.04833	0.553756	1.79366	0.610267	0.723088	0.941416	1.10578	0.325208	0.845915	0.847473	0.914326	0.4881	0.700264	0.448267	0.564789	0.452613	0.408599	0.408102	0.432898	0.476082	0.49255	0.435112	0	0	0	0	0	0	0	0	0	0	0	0	0	0	0	0	0	0	0	0	0	0	0
FBtr0072272	1.19927	6.32457	0.981152	1.30118	1.15624	0.504058	1.4806	0.56099	1.81596	0.450935	0.817281	3.86546	4.24208	3.04188	1.97478	1.41408	0.383244	0.572514	0.623341	0.369334	0.746302	1.07528	0.289009	1.11492	0.171832	1.28487	2	1	0	3	3	1	1	3	2	3	2	3	3	3	3	3	2	3	2	3	3	3	3
FBtr0072274	0.260449	1	0.510916	1	0.309361	1	0.333543	0.116002	0.81316	0.108848	2.19518	5.06162	0.368568	0.123053	0.188062	0.139693	1.61494	3.00761	0.878835	0.935584	0.890186	1.27953	1.00722	1.34299	0.3089	0.567392	0	0	0	0	0	0	0	0	0	0	0	0	0	0	0	0	0	0	0	0	0	0	0
FBtr0072275	0.0583876	14.7904	0.379676	1.11352	0.481445	0.587722	1.10741	0.863595	0.222153	0.420149	0.58092	0.606528	0.908736	2.6483	0.632025	1.86592	0.637345	1.01324	0.719116	0.55771	0.540062	1.79503	0.768957	1.87686	0.866675	1.60667	0	0	0	0	0	0	0	0	0	0	0	0	0	0	0	0	0	0	0	0	0	0	0
FBtr0072277	1.63097	0.995324	2.57358	1.60121	1.95813	1.91762	1.90008	2.82495	1.23201	1.05889	1.04978	0.854756	1.6987	0.738985	1.32334	1.07802	2.64652	1.89861	1.90205	1.84686	0.294849	0.440824	0.319049	0.484836	0.197601	0.415859	0	0	0	0	0	0	0	0	0	0	0	0	0	0	0	0	0	0	0	0	0	0	0
FBtr0072280	0.236701	0.279503	0.376797	0.547344	1.04743	0.849709	0.844931	0.534851	0.471128	0.416088	0.507316	0.291963	0.360027	0.358353	0.218145	0.179614	0.573829	0.434079	0.51067	0.416324	0.504356	0.431409	0.525117	0.43462	0.610756	0.421879	1	1	1	1	1	1	1	1	1	1	1	1	1	1	1	1	1	1	1	1	1	0	0
FBtr0072281	0.601639	0.248055	0.482377	0.373697	0.13823	0.138487	0.355819	0.290606	0.306307	0.17321	0.248031	0.244433	0.311228	0.52765	0.313	0.257149	0.265844	0.235199	0.230443	0.211461	0.404962	0.409772	0.467211	0.342582	0.502281	0.372584	2	3	2	3	3	4	3	4	1	3	1	3	2	3	2	3	3	2	2	3	2	3	2
FBtr0072285	0.893767	1.29299	0.913601	1.68141	1.48054	1.35526	1.06197	1.10441	1.07298	0.899283	1.01883	0.69908	0.434742	1.03368	0.912492	0.843789	0.874735	1.00663	1.11709	1.02004	0.266386	0.259737	0.198319	0.298083	0.250657	0.176833	3	3	3	3	3	3	3	3	3	3	3	3	3	3	3	3	3	3	3	3	3	3	3
FBtr0072287	0.773393	0.542698	0.420377	0.705859	0.715539	0.711278	0.698809	0.71471	0.699163	0.406271	0.472922	0.349771	0.679597	0.816123	0.619711	0.534213	0.523069	0.550442	0.565949	0.57231	0.189044	0.248374	0.231115	0.287803	0.24187	0.125686	1	1	1	1	1	1	1	1	1	1	1	1	1	1	1	1	1	1	1	1	1	1	1
FBtr0072288	0.196017	1.84396	0.365834	0.198606	0.281175	0.396671	0.489791	0.527431	0.654439	0.258805	0.185541	0.0533277	0.12159	0.183852	0.253814	0.0935276	0.463658	0.42534	0.243919	0.472074	0.509446	1.1614	0.504797	1.20087	0.37609	1.00745	0	0	0	0	0	0	0	0	0	0	0	0	1	1	1	1	0	0	0	0	0	0	0
FBtr0072289	0.569425	1	1.5749	1	0.169573	0.484076	0.324374	0.594633	0.00531273	0.206328	0.00474959	0.069198	0.0560949	1	0.68012	0.48955	0.199335	0.243872	0.223151	0.257652	1.25193	0.666862	1.34783	0.697455	0.958256	0.35048	0	0	0	0	0	0	0	0	1	0	0	1	1	2	1	2	0	0	0	0	1	1	0
FBtr0072293	1	0.165846	0.0666339	1	1	1	0.214836	0.0464975	0.122328	0.0217055	0.0389156	0.02442	0.422938	5.41762	0.153114	0.155703	1	0.074841	0.0706606	0.750333	1.0317	1.9051	1.13766	1.29094	0.876229	0.93719	0	0	0	0	0	0	0	0	0	0	0	0	0	0	0	0	0	0	0	0	0	0	0
FBtr0072294	0.229814	1	1	1	0.336005	0.168841	0.467745	0.047499	0.0365267	0.0185529	0.0284987	0.00484496	0.285846	16.2743	0.136071	0.170733	0.160138	0.141962	0.417361	3.56456	0.917372	2.25524	1.03294	1.30968	0.672482	0.933568	0	0	0	0	0	0	0	0	0	0	0	0	0	0	0	0	0	0	0	0	0	0	0
FBtr0072295	1	1	0.149344	1	1	0.0596089	0.0458588	0.0446	0.00873208	0.0272844	0.0282143	0.014759	0.0904363	1.2112	0.169948	0.188719	12.018	0.0935898	0.22664	2.14397	2.52709	1.25863	1.31402	1.39149	0.952459	1.04039	0	0	0	0	0	0	0	0	0	0	0	0	0	0	0	0	0	0	0	0	0	0	0
FBtr0072297	0.161799	1	1	1	1	1	0.0837785	1	0.762074	0.287615	0.536531	0.25053	1.73298	44.473	0.598589	0.579655	1	0.0549372	12.4186	99.6964	1.9258	2.1973	0.680662	0.499276	0.903926	0	0	0	0	0	0	0	0	0	0	0	0	0	0	0	0	0	0	0	0	0	0	0	0
FBtr0072299	0.21557	1	0.352099	0.134888	0.48243	0.28228	0.206574	2.44469	0.0629285	0.0869511	0.107028	0.0937049	0.422256	2.10212	0.431662	0.328837	0.56832	0.113893	0.126405	1.23709	0.592454	1.13026	0.657112	1.38711	0.415212	1.09385	0	0	0	0	0	0	0	0	0	0	0	0	0	0	0	0	0	0	0	0	1	0	0
FBtr0072300	0.235454	1	1	1	0.24646	1	0.221571	1	0.00217039	0.0107202	0.0262699	0.000768015	0.0963029	41.7204	0.208368	0.190268	0.0895818	0.0851627	0.0749958	40.22	1.30953	1.97826	1.26441	0.767956	0.89907	0	0	0	0	0	0	0	0	0	0	0	0	0	0	0	0	0	0	0	0	0	0	0	0
FBtr0072302	0.101921	0.37943	0.512657	0.55017	0.720195	0.629499	0.691956	0.45544	0.757181	0.371017	0.349668	0.315245	0.275453	0.219543	0.732484	0.447064	0.628353	0.461586	0.475537	0.49172	0.425448	0.271052	0.491704	0.265959	0.562606	0.216773	2	2	2	2	2	2	2	2	2	2	2	2	2	0	0	2	2	2	2	2	2	2	2
FBtr0072303	2.15714	1.21463	2.89562	1.06965	2.04914	1.36791	2.06014	1.40736	1.49304	0.937275	1.42406	0.879415	4.98584	0.865053	1.39412	0.778837	1.70872	1.32551	2.05454	1.13338	0.48135	0.207193	0.264762	0.192253	0.17739	0.122097	0	1	0	1	0	1	0	1	0	1	0	1	0	1	0	1	0	1	0	1	0	0	0
FBtr0072305	0.407927	64.3791	0.915228	0.952661	0.428393	2.51547	1.43906	1.87043	1.4324	1.66082	1.40469	1.7348	5.48351	0.795455	1.3451	1.28032	1.36226	1.31488	2.05064	1.61778	0.887271	2.54495	0.493275	2.09875	0.611381	1.79618	0	0	0	0	0	0	0	0	0	0	0	0	0	0	0	0	0	0	0	0	0	0	0
FBtr0072307	0.320605	0.241265	0.718384	0.712229	1.6192	1.3124	1.19741	0.630304	0.703931	0.681034	0.62398	0.520737	0.857704	0.667519	0.72723	0.672766	0.571024	0.506371	0.559846	0.668847	0.466745	0.405823	0.538266	0.516093	0.586276	0.611536	0	0	0	0	0	0	0	0	0	0	0	0	0	0	0	0	0	0	0	0	0	0	0
FBtr0072308	0.710928	1.68222	1.07343	0.977248	0.370195	0.283703	0.228288	0.274146	0.973359	0.841296	0.700293	0.411302	0.401466	0.353997	0.74961	0.49259	0.788507	0.676135	0.860859	0.934433	0.397561	0.6306	0.487049	0.732128	0.633569	0.834857	0	0	0	0	0	0	0	0	0	0	0	0	0	0	0	0	0	0	0	0	0	0	0
FBtr0072309	1.71358	0.488353	1.18018	1.03929	0.929327	1.30081	0.651695	0.925506	0.802941	0.714602	0.66606	0.542241	0.604721	0.886442	1.02586	0.791121	0.779967	0.78657	0.617922	0.723182	0.383221	0.288765	0.408249	0.373804	0.403615	0.360938	1	0	0	1	0	1	0	1	0	1	0	1	0	1	0	1	0	0	0	0	0	0	0
FBtr0072312	0.369989	5.96848	0.482443	0.689415	1.21682	1.30081	1.08959	0.831323	0.529378	0.865311	0.77	0.667164	1.39714	0.763647	0.64922	0.459096	0.829646	0.646514	0.848707	0.596992	0.40668	1.30031	0.465439	1.21692	0.538695	1.15018	2	1	1	2	1	1	1	1	1	2	1	2	2	2	2	2	1	2	1	2	2	1	1
FBtr0072314	1	1	0.136321	0.46529	0.119222	1	1	0.0562006	0.0893261	0.0997906	0.0692153	0.0768014	1	1	0.637793	0.128438	0.458161	0.116381	0.627265	0.0448125	0.772248	1.0826	1.15205	1.00551	0.893142	0.727064	0	0	0	0	0	0	0	0	0	0	0	0	0	0	0	0	0	0	0	0	0	0	0
FBtr0072315	0.131648	0.0696514	0.557587	0.293226	0.813037	0.880529	1.00057	0.397856	1.3254	0.702965	0.852903	1.08345	0.560568	0.606883	0.434421	0.533108	0.629638	0.799535	0.691458	0.568285	0.465762	0.497316	0.519805	0.670821	0.601073	0.833654	0	0	0	0	0	0	0	0	0	0	0	0	0	0	0	0	0	0	0	0	0	0	0
FBtr0072316	0.0827817	1	0.0666339	1	0.092592	4.49046	0.0539298	1	0.0877324	0.00130331	0.0270439	0.0049292	0.355654	24.2833	0.177591	0.0965854	1	1	0.0453649	0.845019	1.49454	2.2122	0.363087	1.32953	0.231475	0.931975	0	0	0	0	0	0	0	0	0	0	0	0	0	0	0	0	0	0	0	0	0	0	0
FBtr0072317	0.132235	0.117179	0.627107	0.271193	0.885308	1.13556	0.776311	0.680291	0.185033	0.300919	0.220259	0.412811	0.246776	0.259615	0.203265	0.21602	0.528927	0.37543	0.545644	0.449209	0.625528	0.697008	0.703236	0.759118	0.549573	0.828241	0	0	0	0	0	0	0	0	0	0	0	0	0	0	0	0	0	0	0	0	0	0	0
FBtr0072320	0.262176	0.129895	0.380266	0.465473	0.533866	0.632616	0.573862	0.508278	0.313772	0.243832	0.330602	0.577122	0.290235	0.456241	0.233395	0.257298	0.573266	0.394476	0.647266	0.569875	0.368051	0.390157	0.316511	0.463024	0.328282	0.49489	0	0	0	0	0	0	0	0	0	0	0	0	0	0	0	0	0	0	0	0	0	0	0
FBtr0072321	0.0920954	2.52603	0.641223	0.360469	0.972989	1.10165	1.05947	0.971468	0.51201	0.917444	0.135467	0.264493	0.364831	0.386164	0.332913	0.309933	0.842962	0.401352	0.800796	0.323581	0.594497	0.92156	0.715177	0.792879	0.633962	0.738991	0	0	0	0	0	0	0	0	0	0	0	0	0	0	0	0	0	0	0	0	0	0	0
FBtr0072322	0.179533	1	0.302025	4.46315	1	0.198646	0.628225	0.306744	0.0487255	0.155731	0.0363797	0.523832	0.572444	2.55699	0.55612	1.21903	0.442684	0.117332	0.623635	14.5521	0.68621	1.77318	1.03654	1.50942	0.696886	1.34857	0	0	0	0	0	0	0	0	0	0	0	0	0	0	0	0	0	0	0	0	0	0	0
FBtr0072323	0.84579	0.637984	2.20252	1.72568	2.23684	3.06956	2.11172	5.02944	2.69472	2.3397	1.72393	1.78861	2.70809	1.67633	3.17915	2.26811	2.93102	3.4803	3.88045	3.08469	0.340142	0.48531	0.320761	0.617998	0.362873	0.723221	0	0	0	0	0	0	0	0	0	0	0	0	0	0	0	0	0	0	0	0	0	0	0
FBtr0072324	0.722934	0.681872	1.86553	0.987291	1.66256	2.35532	1.42998	2.26266	0.949716	0.86589	0.835176	0.660683	1.44874	0.604692	1.60076	0.939392	1.64996	1.17621	1.46651	1.1633	0.285455	0.540329	0.380585	0.606327	0.350482	0.547889	0	0	0	0	0	0	0	0	0	0	0	0	0	0	0	0	0	0	0	0	0	0	0
FBtr0072327	0.63003	0.800074	0.895293	0.900972	0.871793	0.796178	0.675546	0.984086	0.121058	0.114503	0.0894909	0.0707236	0.41172	0.460021	0.136642	0.124255	0.620273	0.642866	0.593456	0.587672	0.597228	0.624172	0.654308	0.667421	0.175558	0.103439	0	1	0	2	0	0	0	1	0	0	0	1	0	1	0	2	0	0	0	0	0	0	0
FBtr0072332	1.02503	1.64822	1.52999	1.96977	1.41439	1.3996	1.04354	1.5635	2.01113	1.46237	1.16658	1.26036	0.89115	0.792273	1.71171	1.31271	1.52119	1.40979	1.28797	1.43333	0.254696	0.210262	0.275153	0.158025	0.20531	0.145682	0	0	0	0	0	0	0	0	0	0	0	0	0	0	0	0	0	0	0	0	0	0	0
FBtr0072333	0.0326547	11.3113	1.64348	3.95585	0.792939	9.97634	0.155489	3.90186	0.100865	0.360632	0.167371	0.167504	0.479482	2.37202	0.220404	0.292464	0.449372	1.71783	6.93588	25.2085	1.91867	1.32076	1.31129	0.955927	1.12442	0.537317	0	0	0	0	0	0	0	0	0	0	0	0	0	0	0	0	0	0	0	0	0	0	0
FBtr0072334	0.183791	23.1372	0.545589	0.138332	0.598463	2.0307	1.45622	2.53898	1.46091	58.4369	0.374911	1.67376	1.62763	1.35339	0.670021	0.849004	1.76296	4.16005	1.57163	3.64089	0.586196	1.87527	0.717902	1.57761	0.774793	1.55622	0	0	0	0	1	1	1	1	0	1	0	1	0	0	0	0	1	0	0	1	0	0	0
FBtr0072335	0.142478	2.927	0.776299	0.29817	0.527975	0.992426	1.01219	1.36346	0.837601	0.808359	0.602364	0.794104	1.08398	1.15456	0.632134	0.667586	1.0797	0.130318	3.58974	4.5516	0.919033	0.991077	0.465278	0.76403	0.604756	0.797356	0	0	0	0	0	0	0	0	0	0	0	0	0	0	0	0	0	0	0	0	0	0	0
FBtr0072336	0.0762347	49.1167	0.182644	6.55562	0.491643	0.674929	0.549313	0.600137	0.194153	0.898107	0.2687	0.359473	0.281017	0.328552	0.274385	0.332034	0.188868	0.15939	0.19277	0.147096	0.539264	2.58599	0.636225	2.00553	0.711198	1.64503	0	0	0	0	0	0	0	0	2	1	1	2	1	0	0	1	0	0	0	0	0	1	0
FBtr0072337	1.49368	7.92357	0.506284	0.67992	0.206938	3.69604	1.25587	2.67093	0.778226	0.656017	0.364283	0.310054	2.04584	1.46416	0.683827	1.55205	1.07104	0.250162	0.264493	0.684907	0.687526	1.18632	0.667132	1.09426	0.702563	0.81645	0	0	0	0	0	0	0	0	0	0	0	0	0	0	0	0	0	0	0	0	0	0	0
FBtr0072338	0.503938	0.429468	0.528222	0.683168	0.551943	0.3783	0.567278	0.295842	0.24201	0.268032	0.241342	0.144684	0.299608	0.36726	0.163976	0.338559	0.406073	0.352018	0.306386	0.369512	0.390647	0.37797	0.351708	0.500439	0.0515627	0.373821	2	1	1	2	2	1	1	2	2	1	1	2	2	1	1	2	1	1	0	2	2	0	0
FBtr0072339	2.10983	1.39433	1.88809	0.93737	1.31364	1.59746	1.24802	1.7511	0.966677	0.857685	1.61354	0.832592	3.80827	1.0711	1.48131	1.51603	1.38254	1.41571	1.73269	1.1168	0.452283	0.26237	0.280797	0.32881	0.259301	0.248874	0	1	0	1	0	0	0	0	0	0	0	0	0	0	0	0	0	1	0	1	0	0	0
FBtr0072342	0.634446	0.549822	0.515643	0.903175	1.27068	1.12208	1.18342	1.14408	0.986269	1.19916	0.547932	0.820492	0.616706	1.00237	0.712637	0.83226	0.63008	0.847964	0.617758	0.693776	0.353702	0.227295	0.389371	0.25958	0.42308	0.296485	1	1	1	1	1	1	1	1	1	1	1	1	1	1	1	1	1	1	1	1	1	1	1
FBtr0072343	1.38565	1.42922	1.54787	1.25101	1.82605	2.32803	1.61807	2.72161	0.813568	1.04922	1.19245	1.07821	1.13799	1.29898	1.34161	1.66411	2.07483	2.44489	2.77715	2.43735	0.352885	0.363876	0.255664	0.430715	0.114487	0.365525	0	0	0	0	0	0	0	0	0	0	0	0	0	0	0	0	0	0	0	0	0	0	0
FBtr0072344	2.02847	2.04692	1.12483	1.1422	0.718843	0.618064	0.697648	0.374809	0.680221	0.699188	0.568185	0.403722	0.876278	0.624637	0.67657	0.606448	0.760187	0.653663	0.629103	0.65666	0.495213	0.625985	0.5699	0.720508	0.544909	0.708211	0	2	0	2	0	2	0	2	0	2	0	2	0	2	0	2	0	2	0	2	0	2	0
FBtr0072346	0.490416	1.22533	1.26925	19.0326	2.54163	3.52346	3.10531	2.35439	1.66788	39.165	3.60481	1.31778	1.7989	0.0581228	2.49039	0.0344735	1.68016	57.2551	1.60118	41.8616	0.452292	1.30239	0.557376	1.38223	0.642033	1.28331	0	0	0	0	2	0	0	2	1	0	0	1	2	0	0	2	2	0	0	2	2	0	0
FBtr0072347	0.261888	0.423603	0.770602	0.868069	1.32079	0.945092	1.58153	1.17926	2.36891	0.903104	0.567828	0.675069	2.1849	1.57598	1.22655	0.944016	0.939586	0.66897	0.803976	0.671003	0.567063	0.361327	0.673256	0.309181	0.597806	0.369998	0	2	0	2	1	2	1	2	0	1	0	1	1	2	1	2	1	2	1	2	0	1	0
FBtr0072350	0.271562	1	1	1	0.136485	0.0633458	1	0.0474434	0.039244	0.0464519	0.0745141	0.061341	0.213512	1	0.192439	0.310582	0.0562082	6.43176	0.0467769	2.59858	1.23892	1.58031	1.08487	1.32038	0.768845	1.03356	0	0	0	0	0	0	0	0	0	0	0	0	0	0	0	0	0	0	0	0	0	0	0
FBtr0072351	0.244812	0.477635	1	0.47117	1	1.77545	1	0.849107	0.750317	0.631499	0.3159	0.36574	0.913334	0.0795896	0.502757	0.827614	0.0938542	1	1	3.50319	0.527667	0.993941	0.492149	0.688197	0.465474	0.687346	0	0	0	0	0	0	0	0	0	0	0	0	0	0	0	0	0	0	0	0	0	0	0
FBtr0072353	1	1	0.220364	1	1	1	5.07014	0.456976	1	1	0.0998868	0.0472151	1	1	1	1	1	1	1	1	1.1226	0.387812	1.31982	0.54266	1.20485	0.314161	0	0	0	0	0	0	0	0	0	0	0	0	0	0	0	0	0	0	0	0	0	0	0
FBtr0072354	1	1	1	1	5.73581	1	5.51204	1	1	1	1.14441	1	1	1	0.10158	1	1	1	1	1	1.08743	0	0.924175	0	0.806527	0	0	0	0	0	0	0	0	0	0	0	0	0	0	0	0	0	0	0	0	0	0	0	0
FBtr0072355	1.7128	84.5247	0.56146	0.762913	0.0741941	3.09677	1.15722	1.52437	5.29152	2.03054	0.150672	1.35015	2.27475	1.32129	0.729308	1.4765	2.67531	0.099869	0.619933	1.55645	1.03969	2.68826	1.31648	2.17391	0.81248	1.84082	0	0	0	0	0	0	0	0	0	0	0	0	0	0	0	0	0	0	0	0	0	0	0
FBtr0072356	1	0.166888	1	0.073512	0.259863	0.554345	1	0.49316	0.222264	0.01951	0.0215759	0.0142767	1	1	0.0970784	0.0858823	1	4.67084	1	0.623021	0.671806	1.82942	0.792713	1.09931	0.454091	0.737342	0	0	0	0	0	0	0	0	0	0	0	0	0	0	0	0	0	0	0	0	0	0	0
FBtr0072357	0.305125	0.496009	0.302734	0.902129	1	1	0.293792	0.170091	0.0919588	0.0312303	0.0393111	0.0130416	0.924008	0.105793	0.111477	0.136711	0.123036	1	1	5.26263	0.942858	1.73423	1.01579	1.00236	0.735695	0.596368	0	0	0	0	0	0	0	0	0	0	0	0	0	0	0	0	0	0	0	0	1	0	0
FBtr0072362	0.123396	1.74839	0.105165	0.591057	0.161943	0.583453	0.706962	0.493518	0.424409	0.593315	0.238557	0.0825082	0.471917	0.396956	0.607814	0.17099	0.724745	0.488161	0.756707	0.407552	0.60326	0.816795	0.796131	0.818431	1.05467	0.699955	0	0	0	0	0	0	0	0	0	1	0	1	3	3	3	3	1	2	1	2	1	0	0
FBtr0072364	0.915677	0.542712	0.989418	1.2717	0.862451	0.648931	0.778558	0.604334	0.991676	0.951128	0.650472	0.731493	0.834153	1.34168	0.817943	1.03547	0.490819	0.399438	0.500788	0.464746	0.231752	0.416903	0.153068	0.346797	0.100202	0.442456	2	2	2	2	2	2	2	2	1	2	1	2	2	2	2	2	2	2	2	2	2	2	2
FBtr0072368	0.248725	0.242276	0.108329	0.204751	0.373074	0.46944	0.473662	0.224137	0.282713	0.429217	0.209389	0.110723	0.22845	0.169248	0.145123	0.114795	0.210388	0.155599	0.254852	0.144451	0.417731	0.554189	0.451886	0.497318	0.524903	0.434194	3	0	0	3	4	3	1	6	4	6	3	7	9	8	8	9	1	5	0	6	5	5	4
FBtr0072369	0.201959	0.161086	0.708658	0.958097	1.10426	1.216	1.05285	0.793098	0.903456	1.18699	0.564439	0.778462	0.693174	1.33049	0.952798	0.927745	0.634311	0.719761	0.716044	0.676341	0.352952	0.384835	0.449401	0.453813	0.541878	0.574222	0	0	0	0	1	1	1	1	1	1	1	1	1	2	1	2	1	1	1	1	1	0	0
FBtr0072370	0.139579	3.32778	1.29147	1.56363	0.903135	1.58806	1.51637	0.387574	0.798701	0.62826	2.78176	1.00332	2.26548	1.59477	0.534634	0.158985	0.873604	1.33157	2.27882	0.595887	0.641836	0.747214	0.719941	0.744136	0.627806	0.705605	0	0	0	0	0	0	0	0	0	0	0	0	0	0	0	0	0	0	0	0	0	0	0
FBtr0072371	0.115386	3.13805	0.43349	1.00817	0.721335	1.00875	0.647023	0.219195	0.207009	0.324967	0.360165	0.266982	1.69732	0.268444	1.11739	0.16007	0.442998	2.19073	1.13893	0.142679	0.718638	1.17128	0.575625	1.11751	0.566578	0.932507	0	0	0	0	0	0	0	0	0	0	0	0	0	0	0	0	0	0	0	0	0	0	0
FBtr0072374	1.43107	1.31068	1.46077	0.748981	1.04373	0.82945	0.610677	0.878159	0.836064	0.658727	0.755454	0.484244	0.775671	0.318589	0.94359	0.671923	1.20785	0.81839	1.78399	0.90319	0.347287	0.348457	0.348409	0.340396	0.350845	0.267155	0	0	0	0	0	0	0	0	0	0	0	0	0	0	0	0	0	0	0	0	0	0	0
FBtr0072375	0.144502	0.526313	0.470769	0.651225	0.806854	0.813021	0.666997	0.787292	0.736964	0.40036	0.401115	0.439932	0.540516	0.524079	0.614526	0.732439	0.840463	0.849815	1.04579	0.671232	0.405973	0.249469	0.460396	0.290969	0.549722	0.191064	0	2	0	2	1	2	1	2	1	1	1	1	1	2	1	2	1	1	0	2	1	1	0
FBtr0072376	1	1	1	1	1	0.0790603	1	34.0934	0.0945522	0.0555771	0.165218	1	1	1	1	0.492342	1	1	1	1	0.444626	2.59223	0.633669	2.20322	0	1.84735	0	0	0	0	0	0	0	0	0	0	0	0	0	0	0	0	0	0	0	0	0	0	0
FBtr0072377	1	1	1	1	1	1	0.145529	1	0.0409135	0.0482882	0.0641361	0.0332911	0.91004	25.8666	0.216281	0.31356	1	1	0.306546	11.2644	0.779344	1.95207	0.928772	0.728184	0.543293	0	0	0	0	0	0	0	0	0	0	0	0	0	0	0	0	0	0	0	0	0	0	0	0
FBtr0072380	0.109364	1	0.266991	1	0.238018	0.116035	0.104211	0.0461075	0.131118	0.0825539	0.161853	0.0632565	1	1	1	1	1	6.59699	1	1	0.862767	1.64159	0.407547	1.2406	0.473059	0.982935	0	0	0	0	0	0	0	0	0	0	0	0	0	0	0	0	0	0	0	0	0	0	0
FBtr0072392	0.296076	0.222378	0.762681	0.749545	0.983612	1.2583	0.853058	1.47326	0.796608	0.918878	0.840528	0.800292	0.968353	0.853915	0.603867	0.916282	1.04068	1.12284	1.06092	1.03061	0.282022	0.357756	0.314148	0.482052	0.413424	0.603336	0	0	0	0	0	0	0	0	0	0	0	0	0	0	0	0	0	0	0	0	0	0	0
FBtr0072393	0.735375	0.264896	0.600165	0.475836	0.835361	0.911839	0.852005	0.498007	0.44204	0.158252	0.534105	0.311473	0.28309	0.11286	0.392494	0.647579	0.387271	0.430087	0.589041	0.429739	0.345567	0.556724	0.25104	0.609089	0.153222	0.503457	2	1	1	2	1	0	0	1	0	1	0	1	0	1	0	1	2	1	1	2	1	2	1
FBtr0072395	1.66264	1.41599	1.60132	0.762766	1.12934	0.579214	1.07558	0.796886	0.696389	0.463347	0.651795	0.414433	0.827477	0.731492	0.799384	0.760442	1.36086	1.553	1.24287	1.16728	0.328587	0.449363	0.378621	0.49516	0.224927	0.409897	0	0	0	0	0	0	0	0	0	0	0	0	0	0	0	0	0	0	0	0	0	0	0
FBtr0072396	0.216	3.11988	0.32681	0.881013	1.39316	1.34995	1.20678	0.783755	0.86227	0.540955	0.442554	0.836693	1.92666	0.895857	1.66078	0.688579	1.75013	1.26072	1.8845	1.30252	0.568167	0.633237	0.659027	0.760525	0.764177	0.70811	0	2	0	2	3	2	2	3	3	2	2	3	2	2	1	3	4	2	2	4	3	2	2
FBtr0072397	1.83129	1.22395	1.97338	1.63715	2.55498	1.49868	2.21452	1.90705	2.38651	1.87346	2.20799	1.07364	2.27245	1.17747	3.19944	0.990019	2.60861	3.27433	2.63314	2.5105	0.162335	0.418553	0.120239	0.220701	0.147716	0.181624	3	2	2	3	3	2	2	3	2	2	1	3	3	2	2	3	3	2	2	3	3	2	2
FBtr0072399	2.31557	4.52565	0.567791	3.53686	1.84964	1.55028	1.12227	6.09037	1.81748	2.29011	1.29782	2.3039	1.23676	5.66001	1.03233	3.9078	0.982326	1.62961	0.916295	1.69667	0.40042	0.509264	0.416694	0.50126	0.528259	0.484192	0	0	0	0	0	0	0	0	0	0	0	0	0	0	0	0	0	0	0	0	0	0	0
FBtr0072401	0.369328	5.14924	0.865668	0.444171	1.42357	1.37784	1.98955	1.43314	1.64493	1.76106	1.03965	1.85732	3.27551	2.19332	1.24728	1.06046	2.87154	2.54496	3.23098	2.66723	0.568427	0.625093	0.476544	0.80853	0.602271	0.990974	0	0	0	0	0	1	0	1	0	1	0	1	0	0	0	0	0	0	0	0	0	0	0
FBtr0072403	0.547314	17.5593	1.43386	0.323109	1.35271	1.58017	2.0217	3.29012	1.94677	3.68022	0.927151	0.0735648	2.24782	1.54463	2.07375	0.87006	2.2508	2.03488	3.15856	2.11099	0.417487	1.55417	0.416877	1.49537	0.452678	1.40765	0	0	0	0	0	0	0	0	0	0	0	0	0	0	0	0	0	0	0	0	0	0	0
FBtr0072404	1.35269	185.948	2.30477	0.64656	3.37416	1.92668	2.70535	3.54606	1.5245	2.01785	0.874581	2.71924	2.22504	1.56359	2.09505	1.97029	2.84179	3.32353	2.93391	2.70645	0.352674	2.8149	0.463114	2.28753	0.347243	1.9152	0	0	0	0	0	0	0	0	0	0	0	0	0	0	0	0	0	0	0	0	0	0	0
FBtr0072405	0.126763	0.135846	0.305568	0.200178	0.760621	0.700563	0.582351	0.352407	0.21079	0.188637	0.271832	0.305726	0.273317	0.224889	0.205633	0.31215	0.311113	0.194592	0.291081	0.216029	0.57261	0.569126	0.646265	0.655044	0.63621	0.726974	0	0	0	0	0	0	0	0	0	0	0	0	0	0	0	0	0	0	0	0	1	0	0
FBtr0072409	1.66279	0.389015	1.263	0.984603	0.851585	1.25067	0.787119	1.16205	0.76835	0.620187	0.547913	0.589939	0.814324	0.66655	0.838269	0.68413	1.06319	1.01193	1.1259	0.954676	0.326449	0.336375	0.416062	0.418473	0.356376	0.409709	0	0	0	0	0	0	0	0	0	0	0	0	0	0	0	0	0	0	0	0	0	0	0
FBtr0072410	0.0740233	0.193353	0.0632677	0.0016032	0.0800486	0.249103	0.250348	0.0987279	0.00253124	0.115016	0.109038	0.443956	0.090247	0.00317964	0.0265882	0.00950575	0.179361	0.00944041	0.271492	0.159013	0.788673	1.1036	0.860867	0.833767	0.763083	0.802021	1	1	1	1	0	0	0	0	0	0	0	0	0	1	0	1	1	1	1	1	0	1	0
FBtr0072411	1.41393	0.208837	2.35957	0.683284	1.57951	2.21672	1.74849	1.27124	1.01986	2.28926	0.830803	1.10745	0.781364	1.01439	1.07472	1.35072	1.68625	1.48621	1.44835	1.32056	0.347731	0.484815	0.366158	0.638812	0.232468	0.789841	0	0	0	0	0	0	0	0	0	0	0	0	0	0	0	0	0	0	0	0	0	0	0
FBtr0072412	0.909695	1.18462	1.29311	0.883159	0.461241	0.918821	0.739414	1.03408	0.56737	0.571389	0.456462	0.434327	0.634272	0.526338	0.986946	0.840838	1.13839	1.10552	0.839265	0.913945	0.353415	0.300588	0.43814	0.338133	0.408971	0.135168	1	1	1	1	1	1	1	1	0	1	0	1	1	1	1	1	1	1	1	1	1	1	1
FBtr0072413	0.354798	0.858949	0.675399	1.11861	1.50588	0.806501	1.43412	1.48226	0.74916	4.71224	1.1286	2.86488	2.71878	2.08399	1.41025	2.03152	2.36431	1.96468	3.13481	1.81561	0.593308	0.58283	0.468295	0.780623	0.571652	0.289611	0	0	0	0	0	0	0	0	0	0	0	0	0	0	0	0	0	0	0	0	0	0	0
FBtr0072417	0.299384	6.65171	0.877392	0.570308	1.15106	1.80205	1.289	1.44065	1.20092	1.07935	1.27952	2.94189	1.01288	1.18347	1.10245	0.883306	1.06845	1.23558	0.958651	1.22004	0.280419	0.940717	0.375787	0.921323	0.484402	1.04717	0	0	0	0	0	0	0	0	0	0	0	0	0	0	0	0	0	0	0	0	0	0	0
FBtr0072420	0.347091	1.1973	0.438209	0.300805	0.789642	1.14685	1.04558	2.21723	1.50797	11.1386	1.36942	0.256423	1.73952	1.37534	0.886339	1.06581	1.20513	2.55078	1.43938	3.3758	0.428776	1.29965	0.521265	1.54692	0.492639	0.645188	0	0	0	0	0	0	0	0	0	0	0	0	0	0	0	0	0	0	0	0	0	0	0
FBtr0072423	0.899328	1.02557	0.657213	0.824711	0.929361	0.666631	0.406069	0.178568	0.447474	0.330573	0.502505	0.246751	0.606708	0.629631	0.555024	0.250508	0.624936	0.590534	0.46141	0.468898	0.29618	0.530937	0.357472	0.631451	0.337337	0.536298	3	3	2	4	3	3	2	4	3	2	1	4	3	2	2	3	3	2	1	4	3	1	1
FBtr0072425	0.181261	0.282099	0.357688	1.02012	0.901923	1.19681	0.56118	0.932528	0.365318	0.636904	0.594527	0.479288	0.351027	0.940387	0.246031	0.477958	0.970505	1.26842	0.699574	1.15234	0.516646	0.411731	0.507617	0.46103	0.618107	0.465429	0	0	0	0	0	1	0	1	0	0	0	0	0	1	0	1	0	0	0	0	0	0	0
FBtr0072426	0.0076829	0.0739111	0.0228773	0.00459569	0.0415536	0.669449	1.66075	6.69107	0.233068	1.20767	0.416439	3.4313	0.187564	1.20483	0.505872	0.0455806	0.100617	0.0786526	0.00979517	1	1.57769	1.46622	1.60955	1.29815	1.8893	1.7393	0	0	0	0	0	0	0	0	0	0	0	0	0	0	0	0	0	0	0	0	0	0	0
FBtr0072427	1.24098	0.505593	1.11421	0.0883327	1.5525	0.840125	1.98099	1.46154	1.75171	1.19889	2.01034	5.16693	3.12494	1.88508	1.25169	0.959376	1.64996	1.48867	1.35918	1.56063	0.344687	0.917407	0.233165	1.19261	0.262183	0.801228	0	1	0	1	1	1	1	1	1	1	1	1	1	1	1	1	1	1	1	1	1	1	1
FBtr0072429	0.523367	0.250654	0.564655	0.657305	1.05198	1.37448	1.0511	1.39172	0.600265	0.590192	0.449067	0.35301	0.48208	0.620306	0.753972	0.723889	0.956688	0.770049	0.772707	0.834901	0.322794	0.495978	0.384555	0.647265	0.367907	0.611377	1	1	1	1	1	0	0	1	0	1	0	1	1	1	1	1	1	0	0	1	1	1	1
FBtr0072430	0.0331245	1	0.0133686	0.231149	0.19997	0.356332	1.09972	25.482	2.67534	50.3758	1.72861	0.624657	1	1	0.0566802	0.0405828	10.5174	1	1	69.9813	1.72992	1.69649	1.13209	1.60211	1.5321	1.84429	0	0	0	0	0	0	0	0	0	0	0	0	0	0	0	0	0	0	0	0	0	0	0
FBtr0072435	0.8084	1.33154	0.444362	1.02826	1.19068	1.29993	1.17143	1.22131	0.836742	0.795292	0.705282	0.656847	0.517236	0.710509	0.389597	0.487179	0.851599	0.907926	0.83272	0.9061	0.352994	0.304867	0.331637	0.264868	0.390755	0.111561	1	1	1	1	1	1	1	1	1	1	1	1	1	1	1	1	1	1	1	1	1	1	1
FBtr0072436	0.485851	2.03455	1.32947	1.25605	1.77101	1.07082	1.70075	1.68979	1.21065	0.911601	1.02686	0.612839	2.35586	0.981073	1.52294	1.09311	1.87023	1.46643	1.99324	1.5106	0.351053	0.330949	0.376735	0.413156	0.446363	0.286821	0	0	0	0	0	0	0	0	0	0	0	0	0	0	0	0	0	0	0	0	0	0	0
FBtr0072437	0.639379	1.13223	0.969007	1.12036	1.14754	1.40159	1.02492	1.64694	0.370081	0.537247	0.392843	0.573101	1.11481	0.434552	0.712802	0.967865	1.20286	1.16408	1.09458	1.02631	0.362223	0.388069	0.444045	0.414294	0.229677	0.189166	0	0	0	0	0	0	0	0	0	0	0	0	0	0	0	0	0	0	0	0	0	0	0
FBtr0072441	0.411738	2.63979	0.717918	0.0198973	0.169804	0.514276	0.535369	0.410564	0.491873	0.302273	0.320526	0.20195	0.0461078	0.0325135	0.198952	0.0827845	0.228933	0.263036	0.161279	0.268798	0.632308	1.64173	0.426557	1.42995	0.501469	1.31874	0	0	0	0	0	0	0	0	0	5	0	5	6	5	4	7	0	3	0	3	0	4	0
FBtr0072444	0.622874	9.0815	0.875079	1.70357	2.12924	1.83952	1.53821	0.346893	0.496001	0.812911	1.18257	0.599033	4.29804	1.20409	1.16253	1.20949	3.12007	2.1821	1.13769	2.33044	0.729018	1.18713	0.539187	1.38878	0.525809	1.21816	0	0	0	0	0	0	0	0	0	0	0	0	0	0	0	0	0	0	0	0	0	0	0
FBtr0072448	0.0368979	14.7904	1.64809	19.5648	0.626169	46.8337	0.288489	1	0.000131314	0.00271415	0.00282308	0.000832232	1.10656	0.613188	0.382918	0.251576	1	0.024197	0.198811	2.22133	1.055	1.77944	1.48118	1.33411	1.08921	0.934966	0	0	0	0	0	0	0	0	0	0	0	0	0	0	0	0	0	0	0	0	0	0	0
FBtr0072449	0.770131	4.56845	1.58223	3.03839	2.44815	2.74206	3.02669	2.35017	2.97492	3.01227	1.12896	0.638025	1.53199	2.77436	0.412093	0.213377	0.770482	0.418909	0.303877	0.256068	0.677393	0.755279	0.48499	0.466385	0.505435	0.305828	1	1	1	1	1	1	1	1	1	1	1	1	1	1	1	1	1	1	1	1	1	0	0
FBtr0072450	1.03772	1	0.182281	1	0.276588	1	0.299318	1	0.0319308	1	0.108527	1	0.320661	1	0.296833	1	0.310897	1	1	1	0.897547	0	1.12923	0	0.881453	0	0	0	0	0	0	0	0	0	0	0	0	0	0	0	0	0	0	0	0	0	0	0	0
FBtr0072451	1.5251	1	1.9764	1	3.05957	1	1.68551	1	2.67522	1	1.8978	1	4.7755	1	1.9488	1	2.75053	1	2.2853	1	0.387563	0	0.280983	0	0.335173	0	0	0	0	0	0	0	0	0	0	0	0	0	0	0	0	0	0	0	0	0	0	0	0
FBtr0072454	1	0.0243687	4.0817	0.361385	0.136019	0.00860553	2.68786	0.00663881	0.132029	0.912469	1.97529	3.24598	1.8679	18.0628	2.37701	2.39607	0.569138	2.64463	0.328455	72.278	0.863821	2.25615	0.932675	1.66825	0.88984	1.73837	0	0	0	0	0	0	0	0	0	0	0	0	0	0	0	0	0	0	0	0	0	0	0
FBtr0072455	0.0898548	0.0511895	70.5452	0.00707284	0.0772477	0.0735839	0.085533	0.956708	0.074832	0.599342	61.4753	5.27496	1.79713	36.4848	3.50759	2.95944	0.809816	2.52638	0.146455	68.9919	1.99049	1.94703	1.54891	1.76715	1.99048	1.68008	0	0	0	0	0	0	0	0	0	0	0	0	0	0	0	0	0	0	0	0	0	0	0
FBtr0072461	0.189893	0.52856	0.302096	0.69957	0.808261	0.399685	0.665556	1	0.198624	1	0.466437	1	0.787335	1	0.436339	10.0331	2.16816	1	1.15172	3.78925	0.827353	1.44994	0.583241	0.347443	0.596108	0.39515	0	0	0	0	0	0	0	0	2	0	0	2	0	0	0	0	1	0	0	1	1	0	0
FBtr0072462	0.0730537	4.35145	0.11102	0.465836	0.130298	1.52563	1.16953	1.99169	0.217932	1.91275	0.0701966	1.24537	0.473941	1.16944	0.244677	0.908011	0.0886141	1.45004	0.0499456	3.61622	1.30431	0.652196	1.46147	0.686368	1.43648	0.787629	0	0	0	0	0	0	0	0	0	0	0	0	0	0	0	0	0	0	0	0	0	0	0
FBtr0072463	0.170258	5.5855	0.52232	1.71074	1.87148	2.6711	0.469258	0.863895	4.28064	7.09296	1.73264	0.303253	0.785532	0.650913	0.960214	0.098293	3.33214	0.227031	8.30177	3.89046	1.11841	1.06745	1.01499	0.895864	0.999712	0.759143	0	0	0	0	0	0	0	0	0	0	0	0	0	0	0	0	0	0	0	0	0	0	0
FBtr0072464	1.20976	1.11245	0.781464	0.905509	1.15729	0.757264	1.31177	0.593529	0.821568	1.12686	0.623571	1.06623	0.970975	1.76406	0.408907	0.791582	1.02519	1.22932	1.11253	1.21544	0.299634	0.309343	0.282204	0.233474	0.207581	0.262028	3	2	2	3	3	2	2	3	3	2	2	3	3	2	2	3	3	2	2	3	3	2	2
FBtr0072476	0.175711	0.670649	0.897752	0.53778	0.464048	0.643855	0.523098	0.529199	0.155071	0.0767762	0.279465	0.311052	0.535917	0.312059	0.332941	0.178889	0.508516	0.418799	0.406043	0.209421	0.504214	0.523425	0.67187	0.492201	0.576148	0.121557	1	2	0	3	1	2	0	3	2	3	0	6	3	3	0	6	1	3	1	4	3	4	2
FBtr0072477	0.355983	0.490973	0.689897	1.26265	1.55757	1.3009	1.36331	1.86603	0.615852	0.953624	0.805503	0.612296	0.817529	0.929161	0.529276	0.598999	1.2253	1.47243	1.14239	1.0768	0.430895	0.409501	0.516769	0.468322	0.568498	0.459084	0	0	0	0	0	0	0	0	0	0	0	0	0	0	0	0	0	0	0	0	0	0	0
FBtr0072480	0.346386	0.301888	0.833871	0.625952	0.747608	0.990805	0.615306	0.42098	0.543867	0.495125	0.418559	0.505148	0.556847	0.410006	0.8011	0.452715	0.676996	0.719134	0.65546	0.471485	0.254946	0.363552	0.320772	0.427423	0.334776	0.516131	0	1	0	1	1	2	1	2	0	1	0	1	0	2	0	2	1	2	1	2	1	2	1
FBtr0072483	0.660897	0.543434	1.093	1.01965	0.985346	0.708486	0.805398	1.05238	0.819756	0.986748	0.513593	0.353013	0.719658	0.75958	0.741704	0.694236	1.13117	0.928285	0.905287	0.99044	0.231539	0.28923	0.258587	0.371856	0.215972	0.296645	0	0	0	0	0	0	0	0	0	1	0	1	0	0	0	0	0	0	0	0	0	0	0
FBtr0072484	2.80385	1.63654	3.04895	1.78641	1.79057	0.505395	1.35199	0.732731	1.68829	0.767435	1.52828	0.914068	0.934326	0.539821	0.978757	0.820631	1.97742	1.82901	2.12089	1.16023	0.384036	0.473832	0.348974	0.497269	0.35966	0.549594	0	0	0	0	0	0	0	0	0	0	0	0	0	0	0	0	0	0	0	0	0	0	0
FBtr0072486	0.646772	0.336961	0.537312	0.586424	0.847424	0.432227	0.640954	0.525631	0.681355	0.820715	0.525075	0.560867	0.439235	1.09251	0.408744	0.577152	0.497218	0.542197	0.506376	0.514748	0.229552	0.355044	0.180764	0.301434	0.194105	0.232191	0	0	0	0	0	0	0	0	0	0	0	0	0	0	0	0	0	0	0	0	0	0	0
FBtr0072499	0.618552	0.565333	2.3378	1.27833	1.95794	1.41255	1.21328	3.60772	0.530307	0.437344	0.658235	0.885247	1.01527	0.653496	0.635712	0.73275	0.29432	0.650828	0.552647	0.475669	0.684657	0.887009	0.629625	0.852812	0.50095	0.766222	0	0	0	0	0	0	0	0	0	0	0	0	0	0	0	0	0	0	0	0	0	0	0
FBtr0072501	0.650872	2.06464	1.17493	3.37838	2.31864	3.37698	2.48983	3.20569	2.81099	4.04163	1.44581	4.60589	2.81622	2.06376	2.3732	1.43388	2.17762	0.682887	1.10044	1.78791	0.400588	0.466571	0.467609	0.248833	0.53658	0.210573	0	0	0	0	0	0	0	0	0	0	0	0	0	0	0	0	0	0	0	0	0	0	0
FBtr0072503	1.07403	1.06787	1.85725	1.42157	2.01812	2.44005	1.65437	2.53466	0.956198	0.935209	0.987419	0.685888	1.20833	0.595796	1.69565	1.14742	1.9844	1.54935	1.78178	1.32624	0.276422	0.482533	0.333073	0.522323	0.249798	0.392726	0	1	0	2	0	1	0	2	0	1	0	2	0	1	0	2	0	1	0	1	0	0	0
FBtr0072504	0.786605	6.6955	1.52254	1.21745	3.1823	2.97074	2.64094	3.83624	1.37156	1.16417	1.85123	1.09882	2.54405	1.49559	2.63681	0.673424	3.00444	4.41894	2.81415	2.78519	0.357397	0.72573	0.464067	0.779605	0.531615	0.621347	0	0	0	0	0	0	0	0	0	0	0	0	0	0	0	0	0	0	0	0	0	0	0
FBtr0072507	0.231993	0.171714	0.0622415	1	0.0929348	0.129108	0.12518	0.132354	0.00124209	0.0146294	0.0309753	0.0289853	0.339323	1.76982	0.14823	0.203005	1	0.656358	0.234033	35.0086	1.28342	2.79707	0.902358	1.52153	0.57682	1.19523	0	0	0	0	0	0	0	0	0	0	0	0	0	0	0	0	0	0	0	0	1	0	0
FBtr0072515	0.768454	0.976524	0.957891	1.38947	0.887982	1.01298	0.772009	0.737508	0.906321	0.971424	0.694052	1.03995	0.471435	0.985037	0.559755	0.546319	0.99347	0.791466	1.16526	0.783972	0.254711	0.245174	0.121717	0.20585	0.109475	0.26189	7	7	7	7	6	7	6	7	7	7	7	7	7	7	7	7	7	7	7	7	7	7	7
FBtr0072518	0.086793	1	0.495422	1	0.234295	0.157659	0.0566293	0.121142	0.0158549	0.138607	0.12218	0.0978544	0.0338219	1	0.327286	0.337884	1	0.0295861	0.13053	0.590692	1.20981	0.922027	1.04758	1.07419	0.918079	0.872548	0	0	0	0	0	0	0	0	0	0	0	0	0	0	0	0	0	0	0	0	0	0	0
FBtr0072519	1.89878	1.53651	1.10128	1.64571	1.83479	1.74079	1.94316	1.57675	1.75724	1.62383	2.08858	2.19963	1.35222	1.43192	2.05197	2.03938	2.26745	1.51307	2.18689	2.09489	0.19869	0.156046	0.195576	0.142234	0.234862	0.0550387	0	0	0	0	0	0	0	0	0	0	0	0	0	0	0	0	0	0	0	0	0	0	0
FBtr0072520	1.42139	1.92036	0.83064	1.7857	1.12805	1.29973	0.963227	1.41828	1.00677	0.944423	0.868017	1.02662	0.555645	0.903185	0.833283	0.899179	0.640365	0.855478	0.723023	0.714266	0.279748	0.351845	0.20854	0.28172	0.234519	0.183359	3	3	3	3	3	3	3	3	3	3	3	3	3	3	3	3	3	3	3	3	3	3	3
FBtr0072524	0.657294	0.19307	0.260721	0.328596	0.252608	0.254179	0.429655	0.234887	0.430218	0.205372	0.3608	0.394804	0.629787	0.115219	0.269101	0.134126	0.39929	0.279656	0.562926	0.248065	0.351227	0.352706	0.37324	0.291254	0.474704	0.224286	2	3	2	3	1	1	0	2	0	2	0	2	2	2	1	3	1	2	0	3	2	2	1
FBtr0072526	2.82573	2.26413	1.80085	1.1157	1.12433	0.984562	0.739707	0.703096	0.94855	0.647056	0.632371	0.502708	0.859812	0.468044	0.939668	0.716187	1.10391	1.18492	1.1492	0.981185	0.536002	0.545447	0.620194	0.620015	0.563373	0.542092	0	0	0	0	0	0	0	0	0	0	0	0	0	0	0	0	0	0	0	0	0	0	0
FBtr0072529	2.32665	1.36058	1.17979	0.872366	1.09449	0.789261	1.75493	1.90458	1.50427	0.944782	0.901801	0.725891	1.33034	0.763826	1.55015	0.83682	1.78826	1.00829	2.18731	1.08516	0.295871	0.350101	0.357626	0.412305	0.360366	0.417749	1	1	1	1	1	1	1	1	1	1	1	1	1	1	1	1	1	1	1	1	1	1	1
FBtr0072532	0.34264	0.272224	0.564627	0.746818	0.621279	1.08537	0.735469	0.738875	0.435588	0.602248	0.343926	0.416715	0.237076	0.76358	0.391211	0.525325	0.329981	0.453078	0.471966	0.424437	0.3419	0.391798	0.314542	0.442678	0.291504	0.469927	5	5	5	5	5	6	5	6	4	6	4	6	6	3	3	6	3	3	2	4	6	4	4
FBtr0072534	0.131976	2.97427	0.374291	0.669501	0.604276	0.716477	0.575046	0.585792	0.32075	0.377109	0.313824	0.365947	0.677705	0.287049	0.296512	0.319234	0.458737	0.465597	0.498012	0.374556	0.394518	1.13247	0.458992	1.05811	0.518168	0.937937	0	1	0	1	1	0	0	1	0	1	0	1	1	1	1	1	1	1	1	1	1	1	1
FBtr0072537	1.33754	0.760105	1.38172	0.728079	1.02394	0.704105	0.832185	0.820887	0.663751	0.56857	0.757831	0.438867	0.726073	0.627846	0.593473	0.479072	1.01093	0.917773	1.02352	0.600414	0.289365	0.226156	0.303498	0.210127	0.228874	0.0671254	0	0	0	0	0	0	0	0	0	0	0	0	0	0	0	0	0	0	0	0	0	0	0
FBtr0072539	0.143679	0.361582	0.0226933	0.459846	0.173893	0.226065	0.0657501	0.166518	0.214445	0.141329	0.132706	0.109894	0.178666	0.481899	0.314658	0.333455	0.116761	0.101842	0.0720075	0.242535	0.58326	0.533724	0.560764	0.565232	0.685119	0.436192	0	0	0	0	0	0	0	0	0	0	0	0	0	0	0	0	0	0	0	0	1	3	1
FBtr0072540	1	1	1	1	1	1	2.60563	0.0466089	1	0.0435238	0.0484433	15.1688	13.4986	0.0496791	1.12115	0.241974	1.34114	0.719578	2.59744	0.377563	1.56008	2.3704	0.744898	1.95807	0.572864	0.62587	0	0	0	0	0	0	0	0	0	0	0	0	0	0	0	0	0	0	0	0	0	0	0
FBtr0072541	0.404597	0.36078	0.325639	35.1442	0.028967	0.0320468	1	0.0238021	0.153157	0.031335	0.0712867	0.00143724	0.352181	0.0376369	0.398845	0.217214	0.0825032	15.7941	1	26.79	0.929073	1.69321	1.08495	2.41249	0.925356	1.96884	0	0	0	0	0	0	0	0	0	0	0	0	0	0	0	0	0	0	0	0	0	0	0
FBtr0072546	0.203136	1	0.335154	1	3.39528	0.54623	0.920715	0.48608	0.700758	0.488191	0.468802	0.446205	0.488785	1.2118	0.781547	0.624212	0.520428	0.643434	0.508769	0.53312	1.11068	0.387235	1.19461	0.399971	1.22574	0.369916	0	0	0	0	0	0	0	0	0	0	0	0	0	0	0	0	0	0	0	0	0	0	0
FBtr0072547	1	1	0.151972	8.60034	1	1	0.146547	1	0.0486392	0.0519264	0.0875577	0.0201222	0.269189	1	0.242995	0.162822	0.0142704	1	0.155146	1.38105	1.19074	1.66473	1.13822	1.69337	0.854778	1.31036	0	0	0	0	0	0	0	0	0	0	0	0	0	0	0	0	0	0	0	0	0	0	0
FBtr0072548	0.0198003	0.0283217	0.214106	0.111344	0.260838	0.207825	0.191797	0.153794	0.151042	0.145127	0.138864	0.101052	0.0959582	0.218343	0.15208	0.168556	0.134047	0.134416	0.142678	0.116056	0.435406	0.396696	0.508527	0.484295	0.613113	0.604581	0	2	0	2	2	2	2	3	2	2	2	3	3	2	2	3	2	2	2	2	1	2	1
FBtr0072550	0.43398	0.657459	0.992808	0.708814	0.772631	1.14055	0.822639	0.8372	0.780901	0.488188	0.302916	0.599761	1.06089	0.64522	0.463176	0.397123	1.11745	0.906501	0.980672	0.823308	0.367871	0.299191	0.380821	0.309151	0.309933	0.259141	0	0	0	1	1	0	0	1	1	0	0	1	0	0	0	1	0	0	0	1	0	0	0
FBtr0072551	0.769707	0.394352	0.72521	1.41867	1.40479	1.40592	2.01204	1.18243	1.86492	1.63145	1.41662	1.91969	1.76303	3.11191	1.0481	1.15323	0.943934	1.14742	1.01664	1.31918	0.358758	0.476039	0.392523	0.39194	0.495098	0.438955	3	3	3	3	3	3	3	3	3	3	3	3	3	3	3	3	3	3	3	3	3	3	3
FBtr0072553	0.054637	0.3444	1.4604	0.565305	0.0993147	0.495136	0.215917	1.22574	0.118909	0.178889	0.127264	0.116003	0.438903	0.190756	0.269312	0.373812	0.499832	0.0676528	0.0881425	2.68445	1.25324	1.27735	1.58477	0.822855	1.46864	0.592692	0	0	0	0	0	0	0	0	0	0	0	0	0	0	0	0	0	0	0	0	0	0	0
FBtr0072556	0.418125	0.368057	0.43592	0.564311	1.32715	1.17395	1.30191	0.839314	0.507696	0.731464	0.568922	1.09856	1.76743	1.04854	0.833076	0.68873	1.10848	0.999321	1.41529	0.98964	0.495733	0.304202	0.569758	0.388155	0.588622	0.475174	4	1	1	4	4	3	3	4	4	4	3	5	4	3	2	5	4	3	2	5	3	3	3
FBtr0072557	0.0851706	0.155069	0.471974	0.630894	1.37394	0.923391	1.22401	0.541148	0.793071	0.576384	0.718753	0.286171	0.81845	0.645159	0.556491	0.702191	1.04392	0.610609	0.863025	0.68695	0.470208	0.375312	0.611585	0.521808	0.777142	0.563345	0	0	0	0	1	2	1	3	1	1	0	3	1	0	0	1	1	0	0	1	1	1	0
FBtr0072558	0.477712	0.620137	1.93689	1.53433	2.15775	1.63554	1.54053	1.99029	1.22896	1.29851	1.15692	1.0339	1.13769	1.32778	0.608178	1.18695	1.44295	1.88651	1.52048	1.32389	0.396679	0.291555	0.425882	0.356341	0.487783	0.403906	0	1	0	1	1	1	1	1	0	1	0	1	0	1	0	1	1	1	1	1	1	1	1
FBtr0072559	1.1413	1.26269	1.85211	1.38277	2.7142	1.84002	1.97788	1.52812	1.07196	0.91974	1.67831	1.19613	0.879211	0.529108	1.04316	0.701466	1.62897	1.04957	1.15075	0.868545	0.375054	0.351228	0.347519	0.230859	0.335293	0.165808	1	1	1	1	1	1	1	1	1	1	1	1	1	1	1	1	1	1	1	1	1	1	1
FBtr0072561	0.425427	4.73592	0.633414	0.833911	1.48193	2.19668	1.01162	1.46418	0.898147	0.76478	0.527128	0.538431	1.17277	0.712272	0.823091	0.697885	1.41807	1.4011	1.33779	1.21695	0.386643	0.862618	0.468923	0.899682	0.522842	0.741845	0	0	0	0	0	0	0	0	0	0	0	0	0	0	0	0	0	0	0	0	0	0	0
FBtr0072562	0.442342	1.25394	0.306362	1.0617	1.22819	1.19727	0.945273	0.93899	1.03817	1.19221	0.616489	2.07605	1.77428	1.3802	1.19383	1.34964	1.31023	1.51519	1.12082	1.4319	0.441209	0.232141	0.475623	0.313313	0.58969	0.126937	0	0	0	0	1	2	1	2	2	1	1	2	2	2	2	2	2	2	2	2	2	2	2
FBtr0072563	0.212457	2.55558	0.412095	0.834676	1.27458	0.804254	1.0485	0.198436	0.725717	0.612624	1.06238	0.631601	1.75262	0.766965	0.81908	0.584601	0.324129	0.376369	0.173059	0.399211	0.658971	0.846813	0.524324	0.876641	0.686038	0.924016	0	1	0	1	1	1	1	1	1	1	1	1	1	0	0	1	1	1	1	1	2	1	1
FBtr0072564	1.81965	0.88816	1.21627	1.11957	0.864886	0.909512	0.556627	0.860286	0.621	0.589923	0.964353	0.452881	1.43035	0.514573	0.875527	1.06684	1.19044	1.10516	1.29793	1.40977	0.355261	0.339289	0.461048	0.299812	0.486331	0.1255	0	0	0	0	0	0	0	0	0	0	0	0	0	0	0	0	0	0	0	0	0	0	0
FBtr0072566	0.0447605	1	0.0175077	1	0.0194796	0.0777886	0.0688917	1	0.00434356	0.00198987	0.021682	0.000810419	0.191579	56.1773	0.134916	0.14025	0.159866	1	0.0869189	1.10686	0.88561	2.859	0.792538	1.03955	0.643609	0.599269	0	0	0	0	0	0	0	0	0	0	0	0	0	0	0	0	0	0	0	0	0	0	0
FBtr0072568	0.194625	1	0.192859	1	0.170065	1	0.102715	1	0.2168	1	0.136932	1	0.0426074	1	0.171142	1	0.0371703	1	1	1	1.23116	0	0.250121	0	0.260779	0	0	0	0	0	0	0	0	0	0	0	0	0	0	0	0	0	0	1	0	1	1	0	0
FBtr0072569	2.44105	1.59889	1.36772	1.76109	1.37834	1.08533	0.83605	0.843655	1.70336	2.24456	1.58844	1.55545	1.29783	2.2646	1.69075	1.60584	1.00959	0.933248	0.864932	0.983581	0.337553	0.348596	0.339784	0.328326	0.446905	0.325087	1	1	0	2	1	1	0	2	1	1	0	2	0	0	0	0	1	1	0	2	0	0	0
FBtr0072571	1.12132	1.20652	1.33662	0.634993	0.414173	0.417405	0.569492	0.224197	0.51375	0.34042	0.478854	0.295701	0.509571	0.186524	0.641793	0.128129	0.744658	0.334689	0.659311	0.449408	0.428793	0.738284	0.526146	0.701562	0.510426	0.684659	0	0	0	0	0	1	0	1	0	1	0	1	0	1	0	1	1	1	0	2	1	1	0
FBtr0072573	0.628823	2.20166	1.02603	0.625777	1.82904	1.45832	1.68093	1.08782	1.9758	0.847482	1.49344	2.82828	1.3783	0.981849	1.00491	0.986365	1.42307	1.31454	1.53846	1.14953	0.293414	0.499256	0.358233	0.564	0.43587	0.495656	0	5	0	5	6	7	3	10	6	10	4	12	11	12	9	14	12	11	9	14	11	10	8
FBtr0072574	0.173557	5.34515	1.26413	3.13498	1.24799	1.54104	1.08632	1.06707	1.09013	1.15149	0.940909	0.571798	0.926078	0.98305	0.970018	0.861929	1.69346	1.2499	0.999366	1.15318	0.366458	0.853123	0.420465	0.84323	0.55059	0.696239	3	0	0	3	2	0	0	2	1	3	1	3	3	3	3	3	3	3	3	3	3	1	1
FBtr0072576	1.28181	1.4246	0.796711	1.27394	1.31047	1.04	0.88749	1.31309	1.15074	1.10946	0.738369	0.672882	0.64763	0.867309	0.87692	0.986225	1.06554	0.973122	0.856682	0.92826	0.237759	0.214183	0.244797	0.234935	0.247871	0.128063	0	0	0	0	0	0	0	0	0	0	0	0	0	0	0	0	0	0	0	0	0	0	0
FBtr0072578	0.667427	1.18438	1.43359	1.52697	2.18617	1.80314	1.99257	1.2458	1.05658	1.41265	1.56692	2.00804	2.62706	3.73364	1.65121	1.88429	1.42687	1.38885	1.10615	1.14169	0.368297	0.441046	0.38248	0.210173	0.433805	0.197424	0	0	0	0	0	0	0	0	0	0	0	0	0	0	0	0	0	0	0	0	0	0	0
FBtr0072583	1.24334	0.812955	2.37092	1.16566	1.80941	1.41906	1.38007	1.71046	1.55174	0.976514	1.36277	1.07586	1.37738	0.886494	1.40916	0.827811	2.04408	1.67956	1.69507	1.34624	0.220881	0.281785	0.257539	0.271427	0.298428	0.298458	0	0	0	0	0	0	0	0	0	0	0	0	0	0	0	0	0	0	0	0	0	0	0
FBtr0072585	0.0429949	0.0217943	0.0693848	0.0810925	0.0723585	0.0527173	0.0801649	0.140848	0.00509586	0.0405402	0.0727135	0.0264595	0.107187	0.00291319	0.0660554	0.0389893	0.075855	0.0349918	0.109295	0.391227	0.426179	1.38087	0.499061	0.738118	0.243721	0.683462	1	0	0	1	1	0	0	1	0	0	0	0	0	0	0	0	0	0	0	0	0	0	0
FBtr0072586	0.0550963	0.787897	0.120004	0.26524	0.177933	0.370721	0.293767	0.226829	0.0646483	0.0730865	0.0364644	0.0696587	0.154448	0.227903	0.0516137	0.084493	0.0631942	0.0747031	0.0914718	0.0894226	0.71705	0.982442	0.783366	0.890376	0.626703	0.62384	0	0	0	0	0	0	0	0	0	0	0	0	0	0	0	0	0	0	0	0	0	0	0
FBtr0072587	0.57509	0.0292945	0.812013	0.211024	1.08807	1.42547	1.18713	2.51763	1.48212	1.42857	0.521565	0.465684	0.719108	0.419166	0.811932	0.870111	1.71742	1.52476	2.03763	1.40954	0.465077	0.7454	0.39662	0.938341	0.302517	1.10966	1	0	0	1	1	0	0	1	1	1	1	1	1	1	1	1	1	1	1	1	1	1	1
FBtr0072589	3.20336	1.7853	1.45491	1.52437	0.968828	0.697724	1.05195	0.806875	2.31814	3.86701	1.71572	2.3739	1.29217	2.80562	0.690297	1.33169	1.41979	1.79778	2.31597	2.32811	0.465645	0.494554	0.476111	0.636111	0.625362	0.443448	3	2	2	3	3	2	2	3	3	2	2	3	3	2	2	3	3	2	2	3	3	2	2
FBtr0072592	0.177235	1.9117	0.313211	0.636477	0.953675	0.787925	0.897418	0.10819	0.229426	0.402909	0.313412	1.21795	1.08349	4.26677	0.663821	0.180116	0.184723	0.16412	0.0572928	0.173426	0.771355	1.30771	0.725754	0.76071	0.678789	0.881	0	0	0	0	0	0	0	0	0	0	0	0	0	0	0	0	0	0	0	0	0	0	0
FBtr0072593	0.0560191	0.0543041	0.255877	0.512931	1.27915	1.365	1.46966	0.642855	0.80855	0.501195	0.587189	0.764595	1.00654	1.05172	1.01479	1.0379	0.790108	0.664995	0.823032	0.739855	0.531055	0.491649	0.75042	0.669944	0.931092	0.84357	3	1	1	3	4	3	3	4	4	3	3	4	4	3	3	4	4	3	3	4	4	3	3
FBtr0072594	0.577666	0.209961	0.175068	0.500708	0.508487	0.339804	0.572526	0.548925	0.271544	0.355707	0.312392	0.224533	0.306571	0.347544	0.303218	0.211448	0.343153	0.31862	0.348435	0.284646	0.362928	0.345138	0.426708	0.382854	0.417758	0.387604	0	0	0	0	0	2	0	2	1	3	0	4	10	11	10	11	2	4	0	6	7	5	1
FBtr0072596	0.745104	0.32228	1.45744	1.02746	1.0207	0.685581	0.82411	0.589185	0.645038	0.804462	0.386926	0.397503	0.672362	0.613568	0.327317	0.47645	1.11544	0.892322	0.982017	0.674708	0.417426	0.338387	0.431174	0.409822	0.315136	0.444075	1	1	1	1	1	1	1	1	1	1	1	1	1	1	1	1	1	1	1	1	1	1	1
FBtr0072597	0.701062	0.948306	0.477147	0.561654	0.509003	0.346402	0.259919	0.243738	0.218866	0.175595	0.3018	0.169984	0.148692	0.178151	0.208106	0.181725	0.2655	0.184841	0.312837	0.254764	0.500015	0.771813	0.448024	0.741677	0.371236	0.593754	2	3	2	3	2	3	2	3	2	3	2	3	2	3	2	3	3	2	2	3	3	3	3
FBtr0072599	0.18299	5.89078	1	1	0.746534	3.50606	1.35884	1.24753	0.079005	0.221504	0.242204	0.263575	0.265229	6.92956	0.682713	0.706639	1.6223	1.47921	0.872292	2.11241	0.741075	1.01195	0.857516	1.10937	0.601647	0.784641	0	0	0	0	0	0	0	0	0	0	0	0	0	0	0	0	0	0	0	0	0	0	0
FBtr0072601	1.69579	1.01675	0.987883	0.516662	0.440949	0.228437	0.360171	0.151279	0.344079	0.230108	0.418561	0.197366	0.15756	0.208626	0.192791	0.4124	0.622134	0.426886	0.464773	0.498137	0.808862	0.664907	0.764012	0.853763	0.707527	0.819406	1	0	0	1	1	0	0	1	1	0	0	1	0	0	0	0	0	0	0	0	0	0	0
FBtr0072602	1.83581	1.45156	1.64153	1.80439	1.37377	1.68308	0.677271	1.65134	0.799594	0.725882	0.593233	0.910093	0.776627	1.05116	0.663033	1.45452	0.833967	2.90624	0.549061	1.33656	0.477392	0.404754	0.46169	0.326005	0.366564	0.0888504	2	2	2	2	2	2	2	2	2	2	2	2	1	1	1	1	2	1	1	2	2	1	1
FBtr0072604	2.74375	0.424348	2.58093	0.337522	1.33862	0.544305	1.06765	106.899	0.941353	1	0.916369	0.967941	1.0312	1	1.8831	49.3167	1.59756	35.2328	1.38293	1	0.427726	1.79605	0.525266	2.36219	0.440981	1.96781	0	0	0	0	0	0	0	0	0	0	0	0	0	0	0	0	0	0	0	0	0	0	0
FBtr0072606	0.294463	2.50301	1.01242	0.98199	1.36135	1.15219	1.00335	1.42888	0.635228	0.681982	0.785471	0.549705	1.07339	1.21496	0.65661	1.66685	0.822302	0.91794	0.707689	0.419879	0.351662	0.531638	0.431402	0.58016	0.487849	0.450347	3	1	0	4	3	1	0	4	0	3	0	3	3	1	0	4	0	1	0	1	1	4	1
FBtr0072607	0.984378	0.803802	1.29262	2.13322	1.24097	2.44501	1.13664	1.22223	0.796605	0.789274	0.515495	0.963709	0.351886	0.480212	1.08705	0.945017	1.59318	1.89215	1.16794	1.58912	0.365631	0.493546	0.297807	0.515692	0.116866	0.464509	2	2	2	2	2	2	2	2	0	2	0	2	1	2	1	2	2	2	2	2	2	2	2
FBtr0072608	3.51558	20.032	0.882805	0.529697	0.355903	1.843	0.930911	1.72011	0.556664	2.59582	0.540787	0.184989	0.790952	0.347833	0.587042	0.492736	0.712904	0.0357891	1.14792	7.17474	0.910152	1.76945	1.05167	1.71011	0.999279	1.55071	0	0	0	0	0	0	0	0	0	0	0	0	0	0	0	0	0	0	0	0	0	0	0
FBtr0072609	0.675492	2.54586	0.403725	0.707942	0.685624	1.08033	0.844245	1.26387	0.324486	0.740922	0.199286	0.58614	0.550055	0.315759	0.312799	0.304569	1.12485	0.0676267	2.43176	2.0394	0.862924	0.822949	0.47789	0.630385	0.280298	0.570538	0	0	0	0	0	0	0	0	0	0	0	0	0	0	0	0	0	0	0	0	0	0	0
FBtr0072610	0.207637	0.17165	0.458092	0.425547	0.929664	0.972315	0.825151	0.530982	0.861069	0.544596	0.471707	0.630935	0.277173	0.285833	0.640339	0.528544	0.540693	0.367337	0.494752	0.353277	0.425223	0.458944	0.460079	0.480278	0.550856	0.636236	1	2	0	3	2	3	1	4	1	3	0	4	2	3	1	4	2	3	1	4	2	2	0
FBtr0072611	0.472251	0.907165	0.705671	1.08356	0.672876	0.724486	0.423352	0.543079	0.2364	0.231988	0.158538	0.228837	0.380814	0.361884	0.475466	0.250381	0.681959	0.381575	0.431031	0.446665	0.396564	0.577708	0.499292	0.567063	0.248833	0.285938	2	5	2	5	6	5	5	6	6	5	5	6	5	3	3	5	1	3	1	3	4	4	3
FBtr0072612	1.24257	1	2.12702	1	0.384141	1	0.109588	1	1.16977	1	0.705094	1	0.232032	1	0.804437	1	0.834749	1	0.840177	1	0.689795	0	0.754808	0	0.944497	0	2	2	1	3	2	2	1	3	2	2	1	3	1	2	1	2	0	2	0	2	1	0	0
FBtr0072619	0.110878	1.42561	0.286079	0.349782	0.377471	0.518451	0.394108	0.459402	0.0821133	0.0904518	0.206937	0.113416	0.420375	0.297909	0.104631	0.052947	0.410262	0.36987	0.286368	0.272816	0.500243	0.99748	0.544278	0.993252	0.444438	0.721296	0	0	0	0	2	0	0	2	0	1	0	1	2	1	1	2	2	1	1	2	2	1	1
FBtr0072621	0.969071	0.431022	0.767561	0.334555	0.736002	0.712672	0.651725	0.637791	0.222361	0.315991	0.383255	0.496178	0.568332	0.470935	0.507059	0.575215	0.648513	0.519355	0.611292	0.460543	0.341783	0.250344	0.438904	0.329583	0.172223	0.332789	0	0	0	0	0	0	0	0	0	0	0	0	0	0	0	0	0	0	0	0	0	0	0
FBtr0072625	0.760566	7.54095	1.05131	2.1565	3.55377	2.88675	1.79828	1.76821	2.5591	2.91126	1.18182	0.519858	3.04949	2.24342	2.05043	1.37547	3.74173	3.15343	2.85006	2.7237	0.46786	0.686801	0.586086	0.812727	0.700085	0.745719	0	0	0	0	0	0	0	0	0	0	0	0	0	0	0	0	0	0	0	0	0	0	0
FBtr0072627	0.149643	3.28081	0.84969	0.332684	0.688116	0.799079	0.93854	0.758486	0.475667	0.52401	0.55777	0.353688	2.07257	0.628873	0.871818	0.266918	0.827918	0.783175	0.766478	0.601735	0.609018	1.0582	0.466174	1.12137	0.538382	1.03812	0	1	0	1	0	0	0	0	0	1	0	1	1	1	1	1	1	0	0	1	1	1	1
FBtr0072628	0.0253134	12.4451	0.025036	47.2225	0.0173125	1.73535	0.116028	0.767407	60.4137	1.36669	18.1308	0.392982	0.468051	1.15659	0.0178936	1.04508	0.233786	0.0557121	10.5053	38.2052	2.12227	1.67834	1.84977	1.73528	1.02093	1.40084	0	0	0	0	0	0	0	0	0	0	0	0	0	0	0	0	0	0	0	0	0	0	0
FBtr0072630	0.0398955	1.25145	0.288951	2.42342	0.0885235	2.20211	0.544783	0.841551	5.4738	0.719081	9.82622	0.0649415	1.11524	0.723668	0.256039	0.662206	1.42469	0.0482802	1.9258	9.24061	1.50635	1.49911	1.5017	0.727401	0.954907	0.449747	0	0	0	0	0	0	0	0	0	0	0	0	0	0	0	0	0	0	0	0	0	0	0
FBtr0072631	1.69553	69.6705	1.6525	0.0503395	0.0720811	1.70211	0.572066	2.84589	1.31389	1.1043	15.8055	0.279079	0.688129	0.382287	0.0294711	0.577101	0.29344	0.0168496	0.929211	1.20542	2.07423	2.796	1.72029	2.21853	0.808565	1.83593	0	0	0	0	0	0	0	0	0	0	0	0	0	0	0	0	0	0	0	0	0	0	0
FBtr0072633	1	18.0516	9.20339	1	0.150689	4.83347	0.0901789	2.3868	1.18635	0.729249	15.3796	0.694476	1.74033	1.25567	0.960496	1.04699	1.97576	2.34031	106.341	30.2709	2.38273	1.58778	1.41222	1.46643	1.69068	1.19033	0	0	0	0	0	0	0	0	0	0	0	0	0	0	0	0	0	0	0	0	0	0	0
FBtr0072634	0.0398955	0.459889	0.0931479	0.157551	0.02455	2.37776	0.0175798	1.00948	14.6784	1.24463	22.6491	0.357248	0.264763	0.520738	0.0806856	0.783303	0.528707	0.0366913	2.86732	23.4682	1.92432	2.37015	1.59032	0.875573	0.780897	0.981999	0	0	0	0	0	0	0	0	0	0	0	0	0	0	0	0	0	0	0	0	0	0	0
FBtr0072635	0.526754	1.53701	0.700857	0.555752	1.33832	1.64367	1.44655	1.74553	2.86054	6.33132	0.621484	1.44627	1.71245	1.25614	1.35109	1.5408	1.17172	1.2917	1.54999	1.37901	0.509452	0.854528	0.703419	0.933837	0.455845	0.401163	0	0	0	0	0	0	0	0	0	0	0	0	0	0	0	0	0	0	0	0	0	0	0
FBtr0072637	0.0656282	6.25758	0.172422	0.0306873	1.52962	0.935454	0.411518	8.11509	2.1075	0.106384	0.761053	0.434589	1.95554	0.460273	0.944632	0.139469	0.866165	0.321265	1.15878	1	0.703302	1.62963	0.968187	1.35243	1.23401	1.03293	0	0	0	0	0	0	0	0	0	0	0	0	0	0	0	0	0	0	0	0	0	0	0
FBtr0072638	0.17	4.02051	0.212298	0.284658	1.03321	0.483595	0.729231	0.482248	0.338271	0.771494	0.26213	0.610388	1.22182	0.456378	0.591768	0.387027	0.9237	1.02253	0.969118	0.842138	0.595768	1.18261	0.757424	1.2946	0.77893	1.3692	0	0	0	0	0	0	0	0	0	0	0	0	0	0	0	0	0	0	0	0	0	0	0
FBtr0072639	0.431183	3.67748	0.619428	1.20509	1.59897	1.4038	1.95255	1.03204	1.81768	0.888742	1.52543	0.882121	2.73321	3.18206	1.47583	1.47863	0.775577	0.836078	0.755381	0.728296	0.525895	0.67679	0.483369	0.711625	0.643388	0.678423	2	2	2	2	2	3	2	3	2	3	2	3	3	3	3	3	3	3	3	3	3	3	3
FBtr0072642	0.386164	1	0.299484	0.313541	0.484011	0.424683	0.272182	0.214244	0.34044	0.310194	0.331653	0.282635	0.543435	0.337496	0.214809	0.567384	0.143145	0.202503	0.121421	0.196833	0.432754	0.632986	0.213421	0.683948	0.265306	0.720963	0	0	0	0	0	1	0	1	0	1	0	1	0	1	0	1	0	3	0	3	2	3	2
FBtr0072644	0.76039	0.736153	0.225903	0.774978	0.368157	0.555086	0.560402	0.500198	0.587918	0.399694	0.391083	0.452704	0.338726	0.546555	0.385993	0.35236	0.563357	0.48241	0.829122	0.51696	0.384944	0.251718	0.395222	0.269013	0.48565	0.209512	5	5	5	5	5	5	5	5	5	5	5	5	5	5	5	5	5	5	5	5	5	5	5
FBtr0072651	0.116438	0.53797	0.525446	0.246271	0.372214	0.49205	0.564039	0.420166	0.432085	1.10913	0.380654	0.107003	0.501384	0.243468	0.251287	0.182834	0.218176	0.163705	0.150535	0.144555	0.454287	0.827904	0.397134	0.711509	0.514694	0.30202	2	0	0	2	2	1	1	2	2	1	1	2	2	1	1	2	0	1	0	1	2	0	0
FBtr0072652	0.359519	0.253768	0.415634	0.646684	0.878749	0.954956	0.861832	0.626849	0.284608	0.506163	0.357887	0.461219	0.320402	0.592232	0.205455	0.175598	0.518522	0.640242	0.546354	0.584494	0.487822	0.400594	0.512342	0.40647	0.444753	0.462457	0	1	0	1	1	1	1	1	0	1	0	1	1	1	1	1	1	1	1	1	1	1	1
FBtr0072653	0.025838	0.123478	0.088784	0.0278321	0.0873482	0.0138796	0.0263482	0.0333981	0.00742702	0.00489804	0.00746292	0.00188654	0.00497876	0.187401	0.0648248	0.0593144	4.51236	0.0368054	0.00968105	1.11241	2.92857	2.12122	0.931385	1.32776	0.62694	1.00511	0	0	0	0	0	0	0	0	0	0	0	0	0	0	0	0	0	0	0	0	0	0	0
FBtr0072655	0.0983196	0.212137	0.0973222	0.0963724	0.392919	0.0429129	0.194228	0.0619498	0.0225635	0.0217679	0.0165981	0.0023687	0.225204	2.0893	0.160528	0.235348	0.46056	0.25395	0.244058	2.40676	0.768764	1.6718	1.0294	1.03622	0.710866	0.733757	0	0	0	0	0	0	0	0	0	0	0	0	0	0	0	0	0	0	0	0	0	0	0
FBtr0072659	0.665713	24.0757	1.05674	1.33557	1.1356	1.09347	1.36624	1.06958	0.567729	0.686649	0.581311	1.50358	2.23708	0.997346	0.795833	0.688802	0.763634	0.83495	1.09851	0.596566	0.488019	2.22301	0.375092	1.88851	0.27602	1.66174	0	0	0	0	0	0	0	0	1	0	0	1	2	0	0	2	0	0	0	0	2	1	1
FBtr0072663	0.16594	0.237186	0.550437	0.955479	0.933005	1.37519	0.931114	0.89931	0.881135	0.502345	0.517577	0.867569	0.723754	1.13312	0.842211	0.756276	1.00727	1.09105	0.938534	1.04908	0.353017	0.36822	0.463893	0.48822	0.568306	0.542679	0	0	0	0	0	0	0	0	0	0	0	0	0	0	0	0	0	0	0	0	0	0	0
FBtr0072667	0.231551	0.440849	1.01829	0.653942	1.4915	1.934	1.50828	1.5958	0.716045	1.0114	1.11077	2.00723	0.797288	0.899225	1.1019	1.10995	0.978512	1.27339	1.305	1.06956	0.373568	0.428527	0.480234	0.52359	0.563497	0.62416	0	0	0	0	0	0	0	0	0	0	0	0	0	0	0	0	0	0	0	0	0	0	0
FBtr0072668	0.318754	0.565812	0.440525	0.744087	0.923309	0.630057	0.726012	0.463061	0.511151	0.721878	0.442024	0.409763	0.295819	0.592194	0.307967	0.348874	0.290868	0.205354	0.190692	0.219451	0.507013	0.393949	0.397753	0.230155	0.454725	0.195976	0	0	0	0	0	0	0	0	0	0	0	0	0	0	0	0	0	0	0	0	0	0	0
FBtr0072674	0.370503	0.18714	0.46596	0.679728	0.959252	1.20821	1.36975	1.2266	0.946754	1.41425	0.651377	1.20855	1.44374	1.09394	0.817699	0.823643	1.53066	0.59611	2.4418	2.71851	0.561777	0.604652	0.46771	0.46897	0.586255	0.600114	0	0	0	0	0	0	0	0	0	0	0	0	0	0	0	0	0	0	0	0	0	0	0
FBtr0072678	1.80416	2.1202	2.03107	1.36774	0.713333	1.10203	0.123898	1.60914	0.635705	0.888166	0.572669	0.84521	0.893368	0.593082	0.394797	0.428433	1.50643	1.63567	2.00389	1.32105	0.65996	0.437365	0.773312	0.368319	0.773077	0.279407	0	0	0	0	0	0	0	0	0	0	0	0	0	0	0	0	0	0	0	0	0	0	0
FBtr0072679	0.0322782	0.0398079	0.400186	0.616385	1.00182	1.13111	0.900291	0.804876	0.243061	0.768417	0.286455	0.679446	0.278394	0.400377	0.229845	0.392758	0.218765	0.236649	0.119001	0.222942	0.867534	0.623394	0.810988	0.531562	0.774373	0.706523	0	0	0	0	1	1	1	1	1	1	1	1	1	1	1	1	1	1	1	1	1	1	1
FBtr0072680	0.38063	0.540499	1.23258	1.36043	1.45598	1.49967	1.29544	1.43366	0.847029	0.682928	0.508588	0.411049	1.48102	0.579735	1.18034	0.912627	1.26013	1.06979	1.31496	0.924359	0.351781	0.41694	0.465497	0.501033	0.442589	0.37151	0	1	0	1	0	1	0	1	0	1	0	1	0	1	0	1	0	1	0	1	0	1	0
FBtr0072681	0.0234349	0.057296	0.0343682	4.1026	0.130691	0.297611	0.244885	0.0652258	0.0403561	0.0506045	0.139426	0.0594812	0.58058	0.0845669	0.0482523	0.156156	0.113323	0.157049	0.106819	0.0961833	1.13924	2.46475	0.843884	2.11673	0.950635	1.75505	1	0	0	1	0	0	0	0	0	0	0	0	1	0	0	1	0	2	0	2	1	2	1
FBtr0072692	1.30494	0.678728	1.93459	32.9265	0.649398	0.946424	0.332473	0.866496	0.126721	0.171025	3.22197	0.236439	0.633594	16.4643	1.06234	0.745574	0.684583	1	15.9335	32.9167	1.84497	1.57428	0.925934	2.21227	0.675072	1.81245	0	1	0	1	2	0	0	2	1	0	0	1	2	0	0	2	0	0	0	0	2	0	0
FBtr0072693	0.248159	1	0.178694	0.085085	0.218678	0.19001	1	0.0795119	0.0656924	0.0463422	0.0532424	0.0355479	0.175973	1.97612	0.184534	0.173164	0.0953978	0.360302	0.148059	2.18896	1.16363	1.34692	1.20666	1.57301	0.956392	1.31055	0	0	0	0	0	0	0	0	0	0	0	0	0	0	0	0	0	0	0	0	0	0	0
FBtr0072694	0.135164	1.06711	0.510448	0.419977	0.591037	0.626808	0.675854	0.236572	0.26983	0.421238	0.379504	0.344287	0.945994	0.864668	0.758537	0.408944	0.443481	0.759368	0.353657	0.52255	0.479201	0.458243	0.477606	0.572313	0.498627	0.607888	2	2	2	2	2	2	2	2	2	2	2	2	2	2	2	2	2	2	2	2	2	2	2
FBtr0072695	1	1	0.859351	1	0.115979	0.0661834	0.0465845	1	0.0412864	0.205138	0.100217	0.179389	0.147805	1.6175	0.300463	0.491074	0.444184	1	0.0391379	5.29936	1.13923	1.28678	1.23145	0.813357	0.977267	0.609107	0	0	0	0	0	0	0	0	0	0	0	0	0	0	0	0	0	0	0	0	0	0	0
FBtr0072699	2.07729	2.21034	0.527169	1.37521	1.88267	1.52768	1.79321	1.58147	1.03856	0.855955	0.776512	1.43188	1.45007	1.79781	0.608331	0.682664	1.42568	0.921097	1.26938	1.0579	0.421675	0.349955	0.481704	0.29069	0.449223	0.220049	0	0	0	0	0	0	0	0	0	0	0	0	0	0	0	0	0	0	0	0	0	0	0
FBtr0072703	0.369039	0.340047	0.232493	0.471214	0.263727	0.315453	0.241466	0.304349	0.19084	0.251992	0.168048	0.177211	0.339718	0.350214	0.220829	0.216954	0.143621	0.208151	0.107489	0.257661	0.360091	0.29836	0.288069	0.31586	0.227541	0.215473	3	3	3	3	3	3	3	3	3	3	3	3	3	3	3	3	3	3	3	3	3	3	3
FBtr0072706	0.280534	0.209943	0.751994	0.406989	0.69086	0.340223	1.47654	0.746777	1.23128	0.46247	0.654903	0.716885	1.07234	1.31487	1.91241	1.07976	1.22349	0.910148	1.0548	0.881692	0.4501	0.497488	0.510184	0.441819	0.621572	0.537537	0	0	0	0	0	0	0	0	0	0	0	0	0	0	0	0	0	0	0	0	0	0	0
FBtr0072709	1.7224	1.2758	0.493044	0.68601	0.604728	0.442332	0.479572	0.541742	0.439694	0.262503	0.281073	0.226859	0.685369	0.536241	0.418838	0.384249	0.129215	0.118132	0.132393	0.0908418	0.84307	0.759429	0.785063	0.672371	0.728461	0.506756	0	0	0	0	0	0	0	0	0	0	0	0	0	0	0	0	0	0	0	0	0	0	0
FBtr0072711	1.97877	1.47755	0.63828	0.787632	1.08596	0.569904	0.96013	0.671394	0.648066	0.710792	0.591496	0.688081	0.579435	0.753724	0.712298	0.597103	0.885539	0.692707	0.93138	0.675248	0.463232	0.340195	0.535364	0.404694	0.492235	0.468136	1	1	1	1	1	1	1	1	1	1	1	1	1	1	1	1	1	1	1	1	1	1	1
FBtr0072712	0.01023	0.00730906	0.197595	0.173165	0.549655	0.890778	0.56049	0.264728	0.151313	0.155973	0.298168	0.302395	0.0899227	0.090331	0.092445	0.11066	0.113856	0.0584722	0.0859797	0.0759659	0.906963	1.19746	0.753859	1.02821	0.824032	1.15623	0	0	0	0	1	0	0	1	0	1	0	1	2	2	2	2	1	0	0	1	0	1	0
FBtr0072714	0.238029	1	1	1	0.0811322	1	1	1	0.098654	0.0990159	0.021372	0.0359262	0.0211178	0.0819146	0.220944	0.209786	1	1	0.0759904	6.65222	1.16243	1.62617	1.14419	0.69936	0.844143	0	0	0	0	0	0	0	0	0	0	0	0	0	0	0	0	0	0	0	0	0	0	0	0
FBtr0072718	2.25482	1.77168	1.16817	1.16497	1.01021	0.494835	0.776032	0.580841	0.739053	1.09714	0.754929	0.899025	0.64631	1.12124	0.493664	0.8528	1.07033	1.19282	1.21742	1.29354	0.48949	0.350382	0.521748	0.462641	0.503047	0.590788	0	0	0	0	0	0	0	0	0	0	0	0	0	0	0	0	0	0	0	0	0	0	0
FBtr0072720	0.174547	0.180194	0.179846	1	0.265107	0.561458	0.202767	1	0.0179527	0.0160945	0.0170781	0.00379702	0.14756	0.741968	0.160286	0.143569	0.128574	0.356722	0.177789	3.02907	0.52588	1.27843	0.715982	1.00836	0.202074	0.576582	0	0	0	0	0	0	0	0	0	0	0	0	0	0	0	0	0	0	0	0	0	0	0
FBtr0072721	1.07853	1.26511	1.13694	1.6287	1.57177	1.01769	0.841959	0.717779	1.30394	1.33871	1.51917	0.954237	0.855657	1.42301	1.33137	1.83807	1.78168	1.40998	0.982578	1.37743	0.25537	0.253319	0.224049	0.279681	0.262962	0.333351	0	0	0	0	0	0	0	0	0	0	0	0	0	0	0	0	0	0	0	0	0	0	0
FBtr0072723	0.524235	1.1457	0.614862	0.737265	0.571207	0.264242	0.360711	0.212889	0.577732	0.42584	0.429273	0.423935	0.474993	0.232425	0.226094	0.304071	1.07088	0.945917	1.2388	0.79061	0.513013	0.605663	0.191554	0.655663	0.214471	0.744461	3	10	3	11	4	9	3	10	2	4	1	5	0	1	0	1	2	1	0	4	2	0	0
FBtr0072724	1.42208	1.18678	1.88814	1.5244	1.38996	0.930361	0.647302	0.406741	1.03028	0.931951	1.25491	0.769993	1.03298	1.04204	0.555293	0.63531	1.21368	1.19391	2.50627	2.06082	0.442993	0.438569	0.326969	0.394254	0.383726	0.465586	0	0	0	0	0	0	0	0	0	0	0	0	0	0	0	0	0	0	0	0	0	0	0
FBtr0072725	0.0873187	5.03654	1.47026	1.05088	0.754134	1.60291	1.12871	0.374523	0.406792	0.853788	1.08247	0.917528	0.868203	5.43584	0.184132	0.946515	0.191798	0.723766	13.3115	0.130655	2.06279	1.11455	0.620351	1.0433	0.688769	1.02929	0	0	0	0	0	0	0	0	0	0	0	0	0	0	0	0	0	0	0	0	0	0	0
FBtr0072727	1.04685	0.826169	1.15774	0.989271	1.56558	1.03497	1.318	1.09045	0.72299	0.555223	0.865044	0.858877	0.627302	0.430464	0.607824	0.502773	1.57783	0.921405	1.3811	1.05006	0.341348	0.295154	0.274608	0.217341	0.176985	0.115523	1	1	0	2	1	0	0	1	0	1	0	2	1	1	0	2	1	1	0	2	1	1	0
FBtr0072729	0.430604	0.43158	0.725529	0.631262	0.61424	0.482334	0.540894	0.522137	0.565416	0.219963	0.159119	0.0863095	0.330911	0.289943	0.166593	0.157961	0.831744	0.628268	0.756085	0.580517	0.462457	0.497818	0.38595	0.514179	0.214722	0.164105	4	4	3	5	4	3	2	5	4	4	3	5	4	4	3	5	3	2	1	4	2	2	0
FBtr0072730	1.33759	1.20851	1.34715	0.97747	1.27156	0.981291	1.20555	0.967037	0.547073	0.878832	0.834518	0.885106	0.869335	0.829932	0.756962	0.910997	1.17885	0.995884	1.27977	1.00418	0.267947	0.107793	0.2996	0.12171	0.0510146	0.112983	0	0	0	0	0	0	0	0	0	0	0	0	0	0	0	0	0	0	0	0	0	0	0
FBtr0072731	0.800265	1.02204	2.00387	1.4611	1.07598	1.42213	0.558207	1.84249	0.870088	1.06479	0.976938	0.851203	1.17405	1.11907	0.901144	0.51863	1.6111	0.604283	3.16311	3.64838	0.588413	0.663579	0.477766	0.28575	0.570131	0.233391	0	0	0	0	0	0	0	0	0	0	0	0	0	0	0	0	0	0	0	0	0	0	0
FBtr0072732	1.98052	2.15423	2.72099	2.24573	2.85243	1.17541	0.556263	0.231852	1.29986	2.15611	1.24002	2.28767	0.820476	1.54264	0.17309	0.89291	27.8217	0.607011	1	2.14859	2.07579	0.497766	0.509864	0.488848	0.519483	0.652046	0	0	0	0	0	0	0	0	0	0	0	0	0	0	0	0	0	0	0	0	0	0	0
FBtr0072733	2.87305	2.78202	1.02313	2.36661	1.6096	0.918358	0.145636	0.123189	1.19024	1.64546	1.06574	1.27303	0.667266	1.26339	0.627252	0.867882	1.35545	0.511582	1.651	1.74845	0.608267	0.603321	0.682446	0.638593	0.809955	0.801848	0	0	0	0	0	0	0	0	0	0	0	0	0	0	0	0	0	0	0	0	0	0	0
FBtr0072734	0.264616	1.58656	0.258506	2.96249	1.50597	2.01983	1.15777	1.19672	1.04321	1.1046	0.549025	2.19063	2.16941	1.13688	1.81385	0.491117	1.42834	0.60863	1.05773	1.11159	0.565187	0.527632	0.647098	0.37848	0.795877	0.391068	0	0	0	0	0	0	0	0	0	0	0	0	0	0	0	0	0	0	0	0	0	0	0
FBtr0072735	0.030332	0.044124	0.239667	0.329301	0.426606	0.455141	0.455074	0.370368	0.154581	0.220302	0.140912	0.231486	0.187475	0.343984	0.187729	0.124646	0.229113	0.212195	0.227755	0.209818	0.559681	0.479937	0.699057	0.520887	0.682533	0.594795	1	0	0	1	3	2	2	3	3	3	3	3	3	2	2	3	3	2	2	3	3	2	2
FBtr0072738	0.973763	0.775312	0.70487	0.865663	1.00696	0.692772	0.963655	0.570739	1.00771	1.40745	0.658862	1.06575	1.72592	1.79978	1.01224	1.39957	0.721309	0.806743	0.655591	0.802405	0.334677	0.385777	0.180295	0.335822	0.152937	0.172647	0	0	0	0	0	0	0	0	0	0	0	0	0	0	0	0	0	0	0	0	0	0	0
FBtr0072742	0.0771206	0.47181	0.059934	0.137575	0.0560078	0.344109	0.731672	1.37138	0.135316	0.139667	0.109009	0.109781	0.56043	0.574857	0.218335	0.234457	1.00532	1.30908	1.01193	1.01157	0.995571	0.854976	1.35872	1.12632	1.44381	0.936786	0	0	0	0	0	0	0	0	0	0	0	0	0	0	0	0	0	0	0	0	0	0	0
FBtr0072743	0.336764	0.241789	0.810811	0.621471	0.832537	0.546294	0.760162	0.735221	0.620628	0.554588	0.240625	0.347575	0.375277	0.330274	0.489591	0.585746	1.02048	0.812708	0.773963	0.832104	0.40756	0.362745	0.423453	0.357446	0.341827	0.393658	7	6	5	9	8	7	6	9	3	5	3	5	4	4	3	5	1	1	1	1	1	2	1
FBtr0072744	0.183318	6.41554	0.117517	1.52053	0.38424	0.353723	0.308672	0.14624	0.05776	1	0.615403	0.223244	0.271158	0.0223829	0.227955	0.0406666	0.177059	0.359827	1	0.851102	0.841112	1.76646	0.736431	1.49898	0.484424	1.3912	0	0	0	0	0	0	0	0	0	0	0	0	0	0	0	0	0	0	0	0	1	0	0
FBtr0072747	0.160669	0.170784	0.301835	0.657732	0.490715	0.677592	0.52843	0.344488	0.266814	0.197961	0.282031	0.262242	0.30869	0.429603	0.295866	0.306819	0.164488	0.186874	0.152282	0.191161	0.436535	0.554332	0.419016	0.589328	0.462737	0.534434	4	6	3	7	6	7	4	9	5	10	4	11	6	9	4	11	6	8	5	9	7	8	6
FBtr0072754	0.176158	0.135524	0.317807	0.463327	0.688364	0.662408	0.803073	1.03702	0.48758	0.68108	0.294731	0.331923	0.650051	0.859606	0.596271	0.523862	0.710098	0.634468	0.636257	0.560507	0.387941	0.431935	0.529861	0.569464	0.599183	0.656395	0	0	0	0	0	2	0	2	0	0	0	0	2	0	0	2	0	0	0	0	0	2	0
FBtr0072757	1.15201	0.479937	0.816164	0.471205	0.872322	0.775536	0.517335	0.465905	0.30605	0.306737	0.266045	0.267606	0.227718	0.242831	0.292426	0.169501	0.671512	0.356336	0.541014	0.271551	0.546144	0.45962	0.534242	0.388657	0.309934	0.276758	0	0	0	0	0	2	0	2	0	0	0	0	2	0	0	2	0	0	0	0	0	2	0
FBtr0072759	0.622173	0.840624	0.987151	0.440396	1.1609	1.11462	0.794039	0.528616	0.470156	0.473699	0.67814	0.472154	0.724715	0.611208	0.808808	0.452987	1.2498	0.957466	1.45004	0.661599	0.345889	0.362637	0.321746	0.423696	0.262202	0.421305	1	1	1	1	1	1	1	1	1	1	1	1	1	1	1	1	1	1	1	1	1	1	1
FBtr0072760	2.57056	1.80027	4.90136	3.6278	0.773679	1.43759	1.19716	0.309475	0.0606687	0.201598	0.410348	0.971024	3.41217	0.918098	0.0169892	0.337392	1	7.60093	1	1	1.0405	1.24378	1.09792	0.905387	0.787627	0.76801	0	0	0	0	0	0	0	0	0	0	0	0	0	0	0	0	0	0	0	0	0	0	0
FBtr0072761	0.141786	2.60587	0.805083	0.486856	0.820403	0.775799	0.921078	0.578542	0.322978	0.247235	0.497696	0.256503	1.62491	0.579227	0.957521	0.463607	0.627604	0.524161	0.682301	0.449197	0.547952	0.987981	0.535011	1.08479	0.531566	0.902471	0	0	0	0	0	0	0	0	0	0	0	0	0	0	0	0	0	0	0	0	0	0	0
FBtr0072763	2.84588	2.20825	1.80133	1.36151	1.42142	0.901878	0.692421	0.509814	1.18639	0.953139	0.699513	0.942681	1.2771	0.642467	0.657273	0.481293	1.23347	1.54934	1.18792	0.961147	0.501638	0.503396	0.56191	0.511353	0.530898	0.586349	0	0	0	0	0	0	0	0	0	0	0	0	0	0	0	0	0	0	0	0	0	0	0
FBtr0072764	0.490787	13.2667	1.1832	2.0639	3.24249	3.23386	2.02528	0.467003	0.0184369	1.81219	0.385988	0.317828	2.26297	3.41961	1.92933	7.74418	8.14496	0.370349	4.30325	0.241267	1.00759	1.27091	0.994377	1.38724	0.682554	1.21584	0	0	0	0	0	0	0	0	0	0	0	0	0	0	0	0	0	0	0	0	0	0	0
FBtr0072766	1	1	0.304853	1	1	0.133993	0.173622	0.102292	0.230436	0.288429	0.2753	0.147125	0.418314	21.0537	0.399823	0.688929	0.124121	1	0.624158	92.0554	0.702961	2.46417	0.787839	0.975483	0.714119	0.910984	0	0	0	0	0	0	0	0	0	0	0	0	0	0	0	0	0	1	0	1	0	1	0
FBtr0072767	0.392878	0.213605	0.190936	0.108361	0.454079	0.507833	1.73397	0.81498	1.01131	0.534671	0.385869	0.698792	0.786824	0.570255	1.15229	0.753973	1.19375	0.648296	1.69938	0.701392	0.612176	0.4146	0.833849	0.569312	1.01455	0.773049	3	4	3	4	3	3	2	4	3	4	3	4	3	4	3	4	3	4	3	4	3	3	2
FBtr0072773	0.32471	0.399477	0.293644	0.452501	0.626575	0.443951	0.519427	0.259737	0.212768	0.163185	0.353917	0.218216	0.254398	0.64089	0.342473	0.393616	0.139725	0.149508	0.166101	0.0949237	0.470121	0.534478	0.397034	0.386306	0.360431	0.229359	3	2	2	3	3	2	2	3	2	2	1	3	2	2	2	3	3	1	1	3	2	0	0
FBtr0072774	0.941388	0.380557	0.415517	0.265709	0.655946	0.440133	0.624748	0.488198	0.474292	0.375	0.322439	0.238543	0.398278	0.479182	0.389439	0.383251	0.838432	0.753492	0.585483	0.728927	0.362368	0.379106	0.384823	0.265892	0.327852	0.243837	0	0	0	0	0	0	0	0	0	0	0	0	0	0	0	0	0	0	0	0	0	0	0
FBtr0072775	0.164969	0.503412	0.708746	1.50908	2.12944	1.13487	1.78753	1.37641	0.972227	1.15109	1.19288	0.904499	1.04527	1.72674	0.657128	0.971273	1.79315	1.50389	1.55912	1.34671	0.509717	0.294463	0.61766	0.326684	0.765497	0.394461	0	0	0	0	0	0	0	0	0	0	0	0	0	0	0	0	0	0	0	0	0	0	0
FBtr0072776	0.263798	1.25322	1.47919	1.76565	1.79453	1.79406	1.54423	2.52134	0.975813	0.660833	0.900262	0.664935	0.662619	0.648982	0.807846	0.846326	1.4103	1.11798	1.15163	1.02151	0.423931	0.504104	0.481168	0.50376	0.538967	0.284441	0	0	0	0	0	1	0	1	0	1	0	1	0	1	0	1	0	0	0	0	0	0	0
FBtr0072777	0.669178	0.668104	1.06191	1.51278	1.19425	1.51533	1.08341	1.03967	1.10363	1.56765	0.638715	1.58024	1.3173	1.53455	0.821781	0.773508	1.59925	1.54498	1.34275	1.5053	0.281867	0.268457	0.250781	0.286324	0.228953	0.346482	0	0	0	1	0	0	0	2	0	1	0	3	0	0	0	1	0	0	0	2	0	1	0
FBtr0072778	0.152729	1	0.0367881	0.00746285	0.043845	0.0155593	1	0.0195637	0.0351559	0.0771764	0.0805302	0.0750699	1.76541	1.20633	0.256623	0.372128	0.147327	0.181216	0.0664536	4.96741	1.59917	1.92999	1.70058	1.97617	1.50532	1.89117	0	0	0	0	0	0	0	0	0	0	0	0	0	0	0	0	0	0	0	0	0	0	0
FBtr0072779	2.15925	2.01307	0.766253	1.41339	0.986485	1.31715	1.00075	1.14184	1.0505	0.98559	1.03547	0.979595	1.0489	1.39886	0.787509	0.576513	1.03324	0.860366	1.13807	0.911192	0.354339	0.343595	0.426287	0.295551	0.51289	0.257062	1	1	1	1	1	1	1	1	1	1	1	1	1	1	1	1	1	1	1	1	1	1	1
FBtr0072784	0.472017	1.35244	0.491666	0.747635	1.18166	1.19114	1.36711	1.12976	1.408	0.880386	0.963888	1.90839	3.19412	1.86957	1.29908	1.05462	1.82768	1.69893	1.61985	1.62276	0.559374	0.305629	0.425449	0.340462	0.528253	0.231837	0	0	0	0	0	0	0	0	0	2	0	2	2	2	2	2	1	0	0	1	2	2	2
FBtr0072786	1.21051	1.25203	1.09315	1.1194	0.947129	1.68112	1.73467	2.03226	1.98344	1	2.11768	0.410295	3.44583	1.19955	0.86722	1.0597	1.53895	1.86881	2.63845	1.67163	0.466281	0.364953	0.326714	0.450355	0.275121	0.273859	0	0	0	0	0	0	0	0	0	0	0	0	0	0	0	0	0	0	0	0	0	0	0
FBtr0072788	0.982719	1.15937	1.35239	1.05516	0.964577	1.39894	1.04345	0.694735	0.727379	0.868844	0.750956	0.743076	0.806461	0.799762	0.855031	0.926674	1.65267	1.97713	1.63112	1.66269	0.32292	0.377983	0.234418	0.273052	0.166616	0.271767	2	1	1	2	2	1	1	2	2	1	1	2	2	1	1	2	2	1	1	2	2	1	1
FBtr0072790	1.30175	1.25441	0.736961	1.19539	0.848356	0.462494	0.63952	0.308977	0.627974	0.83408	0.856556	0.501988	0.470159	0.724183	0.805412	0.508384	0.775733	0.540254	0.700353	0.533806	0.281683	0.462715	0.297741	0.525961	0.332079	0.607365	0	0	0	0	0	0	0	0	0	0	0	0	0	0	0	0	0	0	0	0	0	0	0
FBtr0072791	2.0256	1.56757	3.24533	2.29406	2.57914	2.44802	1.94388	1.94356	0.973995	1.23725	1.34247	0.987962	1.14857	0.774981	1.00006	1.22622	2.02763	2.39244	1.22189	1.59934	0.429329	0.364954	0.406929	0.333639	0.245672	0.19006	0	0	0	0	0	0	0	0	0	0	0	0	0	0	0	0	0	0	0	0	0	0	0
FBtr0072792	0.0386354	0.0478518	0.215806	0.177181	0.475531	0.268726	0.315463	0.203058	0.129416	0.200061	0.195157	0.219845	0.0901898	0.18214	0.164522	0.116613	0.207812	0.180555	0.20792	0.154025	0.597603	0.342387	0.666282	0.399478	0.700225	0.53173	0	1	0	1	4	3	3	4	4	4	4	4	4	4	4	4	3	3	3	3	4	4	4
FBtr0072795	0.233006	1.78867	0.278076	0.372988	0.572583	0.643771	0.598497	0.675501	0.291229	0.488147	0.284699	0.783214	0.254753	0.536567	0.317011	0.498773	0.551149	0.52534	1.02081	0.617359	0.565244	0.579527	0.434513	0.643002	0.45585	0.720682	0	0	0	0	0	0	0	0	0	0	0	0	0	0	0	0	0	0	0	0	0	0	0
FBtr0072796	0.0763667	0.203358	0.424272	0.104861	0.270389	0.2191	0.425871	0.208884	0.354572	0.0997427	0.00256115	0.0167905	0.247201	0.0438325	0.0941891	0.0638513	0.428041	0.0875472	0.617718	1	0.656709	1.40813	0.698263	0.571838	0.553105	0.289021	0	0	0	0	0	0	0	0	0	0	0	0	0	0	0	0	0	0	0	0	0	0	0
FBtr0072797	0.356246	0.989161	0.18884	0.363791	0.740461	0.660587	0.459115	0.17856	0.444154	0.442822	0.461577	0.307803	0.145286	0.179728	0.0562287	0.035752	0.445434	0.437495	0.3488	0.26108	0.538433	0.710365	0.406483	0.595566	0.530601	0.647475	1	2	1	2	2	1	1	2	1	2	1	2	1	1	0	2	1	1	1	1	2	1	1
FBtr0072800	0.01454	0.0866864	0.0125204	0.0400254	0.0168387	0.0462992	0.0207999	0.0264021	0.0151747	0.0337001	0.0281349	0.00671407	0.0569706	0.0314803	0.299397	0.200151	0.0379212	0.0283156	0.0286576	0.124415	1.64979	0.94794	0.31609	0.666798	0.219629	0.519967	0	0	0	0	0	0	0	0	0	0	0	0	0	0	0	0	0	0	0	0	0	0	0
FBtr0072802	0.203136	1	0.201312	1	0.460455	0.933343	2.07482	7.22084	0.0336378	0.0589221	0.963436	0.485464	0.621485	0.0671023	1.6606	12.3531	0.474505	0.0358617	0.627694	0.589951	0.902746	1.72975	1.16967	1.50848	1.22667	1.22972	0	0	0	0	0	0	0	0	0	0	0	0	0	0	0	0	0	0	0	0	0	0	0
FBtr0072803	0.228287	1	0.732372	1	0.697547	0.386172	0.417911	0.396304	0.216334	0.19054	0.658694	0.199129	2.62154	1	2.26742	0.0944558	0.559103	0.0653503	0.160724	0.0905963	1.01211	0.906856	0.480124	0.710275	0.461518	0.505296	0	0	0	0	0	0	0	0	0	0	0	0	0	0	0	0	0	0	0	0	0	0	0
[truncated: 12,482 more rows]
[truncated: 17 more columns]
