# Supplementary material for: Upstream open reading frames buffer translational variability during Drosophila evolution and development
Source: eLife. 2025 Jun 6;14:RP104074. doi: 10.7554/eLife.104074 (PMC12143884; doi:10.7554/eLife.104074)
Supplement: Figure 5—figure supplement 1—source data 1. [file elife-104074-fig5-figsupp1-data1.xlsx]

## Sheet: figS24A
Sample	Genes with buffering uORFs	All expressed genes	Percent (%)
embryo 0-2h	13	7934	0.163852
embryo 2-6h	8	9795	0.0816743
embryo 6-12h	28	10643	0.263084
embryo 12-24h	20	11158	0.179244
larva	8	11831	0.067619
pupa	9	12209	0.0737161
female body	2	12284	0.0162813
male body	14	10447	0.13401
female head	4	11002	0.036357
male head	3	10545	0.0284495

## Sheet: figS24B
uORF_id	adj_P_log2Gamma	BLS
FBtr0081668_57	0.00547845	0.901737
FBtr0084294_36	0.0335581	0.821402
FBtr0070346_34	0.00437672	0.751801
FBtr0081130_107	0.0408955	0.677505
FBtr0332878_152	0.000629215	0.64461
FBtr0078198_37	0.0218512	0.64461
FBtr0077431_331	0.0108777	0.64461
FBtr0332643_77	0.0483586	0.621741
FBtr0085359_100	0.0333433	0.605311
FBtr0071774_48	0.0115155	0.570599
FBtr0080833_71	3.63464e-06	0.501291
FBtr0073118_33	0.0189476	0.409266
FBtr0070937_246	0.00330851	0.306042
FBtr0071641_141	0.0474321	0.281803
FBtr0072597_41	0.018357	0.142345
FBtr0078669_27	0.00767641	0.13058
FBtr0070804_460	0.0187891	0.056825
