# Supplementary material for: Upstream open reading frames buffer translational variability during Drosophila evolution and development
Source: eLife. 2025 Jun 6;14:RP104074. doi: 10.7554/eLife.104074 (PMC12143884; doi:10.7554/eLife.104074)
Supplement: Figure 5—source data 1. [file elife-104074-fig5-data1.xlsx]

## Sheet: Fig5B
bcd_dmel_mrna			bcd_dmel_RPF			bcd_dmel_TE				bcd_dsim_mrna			bcd_dsim_RPF			bcd_dsim_TE
position	coverage		position	coverage		position	TE			position	coverage		position	coverage		position	TE
1	0		1	0		1	0			1	0		1	0		1	0
2	0		2	0		2	0			2	0		2	0		2	0
3	0		3	0		3	0			3	0		3	0		3	0
4	0		4	0		4	0			4	0		4	0		4	0
5	0		5	0		5	0			5	0		5	0		5	0
6	0.0458333		6	0		6	0			6	0.025		6	0		6	0
7	0.0458333		7	0		7	0			7	0.025		7	0		7	0
8	0.0862745		8	0		8	0			8	0.025		8	0		8	0
9	0.0862745		9	0		9	0			9	0.025		9	0		9	0
10	0.0862745		10	0		10	0			10	0.0513158		10	0		10	0
11	0.10953		11	0		11	0			11	0.0513158		11	0		11	0
12	0.156448		12	0		12	0			12	0.164494		12	0		12	0
13	0.17867		13	0		13	0			13	0.189494		13	0		13	0
14	0.251397		14	0		14	0			14	0.21275		14	0		14	0
15	0.296646		15	0		15	0			15	0.21275		15	0		15	0
16	0.296646		16	0		16	0			16	0.21275		16	0		16	0
17	0.316254		17	0		17	0			17	0.21275		17	0		17	0
18	0.528665		18	0		18	0			18	0.308456		18	0		18	0
19	0.570012		19	0		19	0			19	0.329289		19	0		19	0
20	0.591751		20	1		20	0			20	0.329289		20	0		20	0
21	0.614479		21	0		21	0			21	0.329289		21	0		21	0
22	0.635755		22	0		22	0			22	0.329289		22	1		22	0
23	0.72571		23	0		23	0			23	0.370636		23	0		23	0
24	0.72571		24	0		24	0			24	0.393364		24	1		24	0
25	0.897422		25	0		25	0			25	0.416091		25	0		25	0
26	0.91703		26	5		26	0			26	0.435699		26	8		26	0
27	0.940286		27	2		27	0			27	0.435699		27	7		27	0
28	0.961119		28	0		28	0			28	0.435699		28	1		28	0
29	0.986119		29	1		29	0			29	0.460699		29	0		29	0
30	1.00993		30	0		30	0			30	0.460699		30	0		30	0
31	1.05585		31	0		31	0			31	0.460699		31	0		31	0
32	1.05585		32	0		32	0			32	0.480306		32	0		32	0
33	1.11912		33	1		33	0			33	0.521191		33	0		33	0
34	1.17795		34	1		34	0			34	0.521191		34	0		34	0
35	1.19756		35	0		35	1.51557			35	0.521191		35	1		35	0
36	1.63162		36	3		36	1.36648			36	0.592985		36	0		36	0
37	1.66192		37	1		37	0			37	0.592985		37	0		37	0
38	1.68756		38	0		38	0			38	0.616794		38	0		38	0
39	1.76268		39	0		39	0			39	0.616794		39	0		39	0
40	1.82731		40	0		40	0			40	0.616794		40	0		40	0
41	1.87392		41	0		41	0			41	0.641185		41	0		41	0
42	1.97928		42	0		42	0			42	0.66444		42	0		42	0
43	2.02111		43	0		43	0			43	0.709664		43	0		43	0
44	2.18758		44	0		44	0			44	0.731886		44	0		44	0
45	2.22992		45	0		45	0			45	0.731886		45	0		45	0
46	2.51062		46	0		46	0			46	0.706886		46	0		46	0
47	2.63655		47	0		47	0			47	0.729613		47	0		47	0
48	2.7908		48	1		48	0			48	0.729613		48	0		48	0
49	2.92216		49	0		49	0			49	0.776125		49	0		49	0
50	3.00599		50	0		50	0			50	0.820123		50	0		50	0
51	3.0473		51	0		51	0			51	0.839731		51	0		51	0
52	3.33098		52	0		52	0			52	0.841047		52	0		52	0
53	3.35535		53	0		53	0			53	0.864247		53	0		53	0
54	4.4721		54	0		54	0			54	0.904688		54	0		54	0.869249
55	4.6171		55	1		55	0			55	0.928126		55	0		55	0.862941
56	4.66135		56	0		56	0			56	0.928126		56	3		56	8.91604
57	4.94825		57	0		57	0.771302			57	0.92487		57	0		57	9.4902
58	5.13341		58	1		58	4.38897			58	0.928441		58	28		58	22.7428
59	5.36173		59	6		59	4.14718			59	0.928441		59	5		59	14.8036
60	5.40097		60	34		60	3.45674			60	0.886774		60	45		60	13.5319
61	5.64985		61	0		61	0.701003			61	0.886774		61	0		61	4.73596
62	5.68634		62	0		62	0.999567			62	0.886774		62	0		62	5.82865
63	5.65593		63	7		63	1.10092			63	0.92911		63	16		63	6.31414
64	5.68157		64	3		64	1.3961			64	0.92911		64	4		64	6.21967
65	5.66477		65	1		65	1.99233			65	0.92911		65	2		65	10.5694
66	5.71769		66	10		66	2.78135			66	0.971445		66	16		66	16.4124
67	5.69955		67	9		67	2.17676			67	0.975611		67	20		67	12.4965
68	5.71333		68	9		68	1.2483			68	0.977492		68	24		68	6.91553
69	5.78528		69	4		69	0.373751			69	0.927633		69	1		69	0
70	6.22258		70	0		70	0			70	0.986849		70	0		70	0
71	6.20368		71	0		71	0			71	1.0282		71	0		71	0
72	6.28423		72	0		72	0			72	1.07367		72	0		72	0
73	6.37247		73	0		73	0			73	1.11748		73	1		73	0
74	6.4229		74	0		74	0			74	1.09117		74	1		74	0
75	6.55078		75	0		75	0			75	1.11158		75	0		75	0
76	6.53108		76	0		76	0			76	1.11158		76	0		76	0
77	6.53356		77	0		77	0			77	1.11371		77	0		77	0
78	6.60308		78	0		78	0			78	1.13696		78	0		78	0.717341
79	6.5274		79	0		79	0			79	1.11371		79	1		79	0.731387
80	6.49239		80	0		80	0			80	1.09494		80	2		80	0
81	6.49239		81	0		81	0			81	1.07271		81	0		81	0
82	6.43967		82	1		82	0			82	1.10877		82	0		82	0
83	6.40054		83	0		83	0			83	1.11416		83	0		83	0
84	6.34669		84	0		84	0			84	1.09719		84	0		84	0
85	6.23516		85	0		85	0			85	1.09567		85	0		85	0
86	6.01237		86	1		86	0			86	1.09567		86	0		86	0
87	5.73488		87	0		87	0			87	1.09567		87	0		87	0
88	5.70449		88	0		88	0			88	1.09567		88	0		88	0
89	5.5129		89	1		89	0			89	1.10123		89	0		89	0
90	5.30308		90	0		90	0			90	1.09619		90	1		90	0
91	5.22597		91	0		91	0			91	1.09625		91	0		91	0
92	5.06291		92	0		92	0			92	1.07474		92	0		92	0
93	4.86243		93	0		93	0			93	1.04617		93	0		93	0
94	4.83999		94	0		94	0			94	1.044		94	1		94	0
95	4.64146		95	0		95	0.369289			95	0.995191		95	0		95	0
96	4.66368		96	2		96	0.374207			96	1.0596		96	0		96	0
97	4.51857		97	1		97	0			97	1.08134		97	0		97	0
98	4.45975		98	0		98	0.919635			98	1.08134		98	1		98	4.82231
99	4.2752		99	0		99	1.22466			99	1.05861		99	0		99	6.18474
100	4.2175		100	7		100	1.53138			100	1.012		100	18		100	9.21326
101	4.01264		101	2		101	0.57209			101	1.03374		101	6		101	6.57894
102	3.99292		102	2		102	0			102	0.993294		102	11		102	5.0345
103	3.8922		103	0		103	0			103	1.0129		103	8		103	3.17968
104	3.63835		104	0		104	0			104	1.0129		104	0		104	1.31199
105	3.19098		105	0		105	0.555134			105	0.993294		105	4		105	1.84347
106	3.07391		106	2		106	0.593765			106	1.04254		106	1		106	0.787998
107	2.93098		107	1		107	0			107	1.00184		107	2		107	0
108	2.59269		108	0		108	0			108	1.00123		108	0		108	0
109	2.50471		109	0		109	0			109	1.00123		109	0		109	1.58571
110	2.32414		110	0		110	0.746425			110	1.00123		110	1		110	2.62271
111	2.23878		111	0		111	0.750509			111	1.02449		111	5		111	2.32772
112	2.27627		112	3		112	0.746971			112	1.02449		112	4		112	1.03454
113	2.28692		113	0		113	0			113	1.0441		113	0		113	0
114	2.271		114	0		114	0			114	1.02449		114	0		114	0
115	2.11524		115	0		115	0			115	0.997032		115	0		115	0
116	2.10832		116	0		116	0			116	1.01664		116	1		116	1.04771
117	2.06504		117	0		117	0			117	1.02173		117	0		117	0.785892
118	2.06921		118	1		118	0			118	1.01583		118	3		118	0.791561
119	2.13493		119	0		119	0			119	1.01622		119	0		119	0
120	2.0897		120	0		120	0			120	0.999867		120	0		120	0
121	2.05215		121	0		121	0			121	1.05501		121	0		121	0
122	2.15187		122	1		122	0			122	1.05922		122	0		122	0
123	2.22803		123	0		123	0			123	0.992476		123	0		123	0
124	2.37873		124	0		124	0			124	0.969008		124	0		124	0
125	2.49887		125	0		125	0			125	0.986897		125	0		125	0
126	2.71862		126	0		126	0			126	1.03821		126	0		126	0
127	2.7806		127	0		127	0			127	1.08824		127	0		127	0
128	2.87152		128	0		128	0			128	1.20826		128	0		128	0
129	2.90396		129	0		129	0			129	1.25612		129	0		129	0
130	2.99538		130	0		130	0			130	1.30631		130	0		130	0
131	3.14065		131	0		131	0			131	1.32724		131	0		131	0
132	3.19722		132	0		132	0			132	1.28295		132	1		132	0
133	3.2153		133	0		133	0.691266			133	1.26334		133	0		133	2.08781
134	3.31745		134	1		134	1.34956			134	1.28417		134	0		134	3.71675
135	3.3138		135	3		135	1.44506			135	1.28417		135	10		135	4.92498
136	3.45584		136	4		136	0.916293			136	1.30591		136	8		136	3.28397
137	3.82839		137	2		137	0.435315			137	1.30832		137	6		137	2.05347
138	3.85836		138	0		138	0			138	1.2834		138	2		138	0.80818
139	4.04025		139	1		139	0			139	1.30404		139	2		139	0
140	4.01075		140	0		140	0			140	1.37199		140	0		140	0
141	4.11371		141	0		141	0			141	1.39638		141	0		141	0
142	4.27768		142	0		142	0			142	1.41599		142	1		142	0
143	4.3768		143	0		143	0			143	1.4385		143	0		143	0
144	4.46309		144	0		144	0			144	1.4845		144	0		144	0
145	4.60061		145	0		145	0			145	1.46409		145	1		145	0
146	4.64643		146	0		146	0			146	1.51334		146	1		146	0
147	4.66285		147	0		147	0			147	1.472		147	0		147	0
148	4.59046		148	0		148	0			148	1.472		148	0		148	0
149	4.77754		149	0		149	0.356406			149	1.44761		149	0		149	0
150	4.75315		150	1		150	0.473213			150	1.44761		150	0		150	0
151	4.7927		151	2		151	0.942209			151	1.42538		151	0		151	0
152	4.83792		152	1		152	1.06159			152	1.43017		152	0		152	0
153	4.81751		153	5		153	0.939883			153	1.43017		153	0		153	0
154	4.7709		154	3		154	0.351171			154	1.38896		154	0		154	0
155	4.89547		155	0		155	0			155	1.38896		155	0		155	0
156	4.87051		156	0		156	0			156	1.41396		156	0		156	0
157	4.79407		157	0		157	0			157	1.38896		157	0		157	0
158	4.72234		158	0		158	0			158	1.41674		158	0		158	0
159	4.66098		159	0		159	0			159	1.41674		159	0		159	0
160	4.58809		160	0		160	0			160	1.36785		160	0		160	0
161	4.28982		161	0		161	0			161	1.29285		161	0		161	0
162	4.1649		162	0		162	0			162	1.29285		162	0		162	0
163	4.05222		163	0		163	0			163	1.26959		163	0		163	0
164	3.86813		164	0		164	0			164	1.19986		164	0		164	0
165	3.76589		165	0		165	0			165	1.1501		165	0		165	0
166	3.57129		166	0		166	0			166	0.981712		166	0		166	1.16695
167	3.41814		167	1		167	0.50359			167	0.914669		167	2		167	2.52677
168	3.35232		168	1		168	0			168	0.845747		168	2		168	2.36606
169	3.36663		169	1		169	0			169	0.772404		169	4		169	2.18066
170	3.24057		170	0		170	0			170	0.748594		170	1		170	0
171	3.10888		171	1		171	0			171	0.680115		171	1		171	0
172	2.80719		172	0		172	0			172	0.679672		172	0		172	1.96168
173	2.72222		173	1		173	0.638137			173	0.679672		173	0		173	1.98733
174	2.6708		174	1		174	0.664652			174	0.679672		174	5		174	2.03374
175	2.60673		175	1		175	0.695472			175	0.653356		175	0		175	0
176	2.40309		176	1		176	0			176	0.633748		176	0		176	0
177	2.33043		177	1		177	0			177	0.591176		177	0		177	0
178	2.33043		178	0		178	0			178	0.591176		178	0		178	0
179	2.22757		179	0		179	0			179	0.571568		179	0		179	0
180	2.14145		180	0		180	0			180	0.54379		180	0		180	0
181	2.14145		181	0		181	0			181	0.499792		181	0		181	0
182	2.06089		182	0		182	0			182	0.36055		182	0		182	0
183	1.87972		183	0		183	0			183	0.287049		183	0		183	0
184	1.75304		184	0		184	0			184	0.243045		184	0		184	0
185	1.66828		185	0		185	0			185	0.243045		185	0		185	0
186	1.51444		186	0		186	0			186	0.243045		186	0		186	0
187	1.37707		187	0		187	0			187	0.243045		187	0		187	0
188	1.08749		188	0		188	0			188	0.222212		188	0		188	0
189	0.931064		189	0		189	0			189	0.202604		189	0		189	0
190	0.799221		190	0		190	0			190	0.182996		190	0		190	0
191	0.774221		191	0		191	0			191	0.160774		191	0		191	0
192	0.715005		192	0		192	0			192	0.160774		192	0		192	0
193	0.564696		193	0		193	0			193	0.0967759		193	0		193	0
194	0.458234		194	0		194	0			194	0.0689981		194	0		194	0
195	0.384978		195	0		195	0			195	0.025		195	0		195	0
196	1.2795		196	0		196	0			196	0.352508		196	0		196	0
197	1.2795		197	0		197	0			197	0.396974		197	0		197	0
198	1.2795		198	0		198	0			198	0.418251		198	0		198	0
199	1.29911		199	0		199	0			199	0.43999		199	0		199	0
200	1.32133		200	0		200	0			200	0.43999		200	0		200	0
201	1.38856		201	0		201	0			201	0.510047		201	0		201	0
202	1.41128		202	0		202	0			202	0.510047		202	0		202	0
203	1.44069		203	0		203	1.95013			203	0.558585		203	0		203	0
204	1.4611		204	1		204	3.07395			204	0.602084		204	2		204	6.46002
205	1.4611		205	4		205	3.02748			205	0.627725		205	7		205	5.87939
206	1.50635		206	3		206	1.85358			206	0.627725		206	6		206	3.32174
207	1.52908		207	1		207	8.07072			207	0.649464		207	1		207	12.3176
208	1.55472		208	1		208	11.6747			208	0.649464		208	1		208	16.4234
209	1.55472		209	20		209	11.3099			209	0.649464		209	28		209	16.6663
210	1.55472		210	11		210	3.99124			210	0.649464		210	11		210	5.23229
211	1.55472		211	0		211	0			211	0.669072		211	2		211	0
212	1.58036		212	0		212	1.05246			212	0.669072		212	0		212	0
213	1.63505		213	0		213	2.0709			213	0.691799		213	0		213	1.12259
214	1.63505		214	3		214	2.06045			214	0.711407		214	1		214	1.08891
215	1.66005		215	3		215	1.36674			215	0.734663		215	2		215	1.02606
216	1.66005		216	0		216	0			216	0.757919		216	0		216	0
217	1.66005		217	1		217	0			217	0.846415		217	1		217	0
218	1.6146		218	0		218	0			218	0.866023		218	0		218	0
219	1.6146		219	0		219	0			219	0.866023		219	0		219	0
220	1.59293		220	0		220	0			220	0.866023		220	0		220	0
221	1.47293		221	0		221	0			221	0.885631		221	0		221	0
222	1.45669		222	0		222	0			222	0.905238		222	0		222	0
223	1.44665		223	0		223	0			223	0.981799		223	0		223	0
224	1.29666		224	0		224	0			224	1.00131		224	1		224	2.46312
225	1.25095		225	1		225	0			225	1.08365		225	0		225	2.3165
226	1.21762		226	11		226	0			226	1.16288		226	9		226	5.32374
227	1.08335		227	1		227	0			227	1.20687		227	1		227	4.99948
228	1.08335		228	7		228	0			228	1.38692		228	15		228	4.89123
229	1.10716		229	4		229	0			229	1.40653		229	9		229	6.80105
230	1.06444		230	1		230	0			230	1.45896		230	2		230	11.3333
231	0.978727		231	27		231	0			231	1.48668		231	26		231	11.6829
232	1.00198		232	25		232	0			232	1.57192		232	36		232	10.4972
233	1.02773		233	8		233	0			233	1.66614		233	7		233	4.63096
234	1.04996		234	32		234	0			234	1.71553		234	22		234	4.3677
235	1.02432		235	3		235	0			235	1.80073		235	1		235	1.17855
236	1.02432		236	8		236	0			236	1.79533		236	6		236	2.31718
237	1.05046		237	3		237	0			237	1.83422		237	1		237	1.70745
238	1.02665		238	12		238	0			238	1.89426		238	9		238	1.68373
239	1.00339		239	0		239	0			239	1.8938		239	2		239	0.421501
240	1.00339		240	0		240	0			240	1.91341		240	1		240	0
241	1.02423		241	0		241	0			241	1.88659		241	0		241	0.855733
242	1.02423		242	0		242	0			242	1.88276		242	0		242	1.28948
243	0.976608		243	3		243	0			243	1.83974		243	6		243	1.28624
244	0.976608		244	6		244	0			244	1.86102		244	3		244	0.418531
245	0.927944		245	0		245	0			245	1.89683		245	0		245	0
246	0.861425		246	0		246	0			246	1.97636		246	0		246	0
247	0.862812		247	0		247	0			247	1.99597		247	0		247	0
248	0.862812		248	0		248	0			248	1.9747		248	0		248	0
249	0.885539		249	1		249	0			249	1.99921		249	0		249	0
250	0.865931		250	0		250	0			250	2.02485		250	1		250	0.384191
251	0.781848		251	2		251	0			251	2.04659		251	1		251	0
252	0.80986		252	1		252	0			252	2.17529		252	1		252	0
253	0.890005		253	0		253	0			253	2.226		253	0		253	0
254	0.865615		254	0		254	0			254	2.26996		254	0		254	0.348876
255	0.919875		255	1		255	0			255	2.32069		255	0		255	0.701183
256	0.98972		256	5		256	0			256	2.28843		256	3		256	0.828259
257	1.02516		257	1		257	0			257	2.23629		257	3		257	0.471643
258	0.968022		258	2		258	0			258	2.23629		258	1		258	0.464929
259	0.9958		259	2		259	0			259	2.31205		259	0		259	0.678989
260	1.09201		260	10		260	0			260	2.33427		260	3		260	1.11763
261	1.13645		261	2		261	0			261	2.42285		261	3		261	1.33282
262	1.11081		262	4		262	0			262	2.40074		262	4		262	1.00026
263	1.1874		263	5		263	0			263	2.379		263	5		263	0.553822
264	1.16037		264	0		264	0			264	2.41821		264	0		264	0
265	1.16037		265	1		265	0			265	2.42515		265	0		265	0
266	1.17887		266	5		266	0			266	2.44808		266	0		266	1.09746
267	1.15665		267	5		267	0			267	2.42244		267	2		267	1.10494
268	1.1298		268	13		268	0			268	2.41885		268	8		268	1.78554
269	1.12905		269	0		269	0			269	2.39876		269	0		269	0.89771
270	1.11588		270	2		270	0			270	2.3509		270	8		270	1.00907
271	1.07174		271	0		271	0			271	2.37942		271	0		271	0
272	1.09215		272	3		272	0			272	2.40481		272	1		272	0.559387
273	1.0116		273	1		273	0			273	2.38622		273	1		273	1.13335
274	1.1132		274	2		274	0			274	2.35948		274	3		274	1.14525
275	1.20035		275	4		275	0			275	2.31286		275	6		275	1.04394
276	1.22474		276	0		276	0			276	2.31286		276	1		276	0.345235
277	1.28863		277	2		277	0			277	2.27103		277	2		277	0
278	1.24341		278	0		278	0			278	2.36772		278	0		278	0
279	1.22119		279	0		279	0			279	2.332		279	0		279	0
280	1.22119		280	0		280	0			280	2.38667		280	0		280	0.777391
281	1.2475		281	1		281	0			281	2.37721		281	0		281	0.997699
282	1.26924		282	16		282	0			282	2.43954		282	7		282	2.09476
283	1.3349		283	2		283	0			283	2.39969		283	2		283	1.43364
284	1.35726		284	15		284	0			284	2.41679		284	10		284	1.33719
285	1.40667		285	1		285	0			285	2.43762		285	1		285	0.450397
286	1.40667		286	1		286	1.16534			286	2.32463		286	1		286	0.345134
287	1.50723		287	1		287	1.5669			287	2.34243		287	2		287	0.34833
288	1.46676		288	1		288	0			288	2.2866		288	0		288	0
289	1.37		289	2		289	0			289	2.26083		289	1		289	0
290	1.34143		290	1		290	0			290	2.32814		290	0		290	0
291	1.32744		291	0		291	0			291	2.33142		291	0		291	3.36492
292	1.32744		292	11		292	0			292	2.33345		292	0		292	3.40432
293	1.30471		293	18		293	0			293	2.46737		293	30		293	3.70248
294	1.28032		294	16		294	0			294	2.48387		294	1		294	0.551294
295	1.25255		295	14		295	0			295	2.39501		295	3		295	0.449019
296	1.11639		296	0		296	0			296	2.3766		296	1		296	0
297	1.092		297	0		297	0			297	2.35486		297	0		297	0
298	1.11639		298	0		298	0			298	2.39382		298	0		298	0.672805
299	1.13739		299	2		299	0			299	2.34986		299	0		299	0.900017
300	1.07066		300	12		300	0			300	2.39046		300	6		300	1.10696
301	1.16058		301	4		301	0			301	2.37049		301	2		301	0.436821
302	1.1893		302	8		302	0			302	2.46587		302	2		302	0
303	1.21459		303	1		303	0			303	2.48912		303	0		303	0
304	1.2409		304	7		304	0			304	2.46348		304	0		304	0.33147
305	1.36487		305	13		305	0			305	2.42749		305	1		305	1.11221
306	1.27678		306	5		306	0			306	2.34933		306	2		306	1.012
307	1.26561		307	13		307	0			307	2.4159		307	7		307	0.89278
308	1.39236		308	0		308	1.8773			308	2.34923		308	0		308	0
309	1.47679		309	2		309	1.74742			309	2.40332		309	1		309	0
310	1.66302		310	3		310	0.996454			310	2.38191		310	0		310	0
311	1.72921		311	0		311	0			311	2.36017		311	0		311	0
312	1.73088		312	0		312	0			312	2.26524		312	0		312	0
313	1.77874		313	2		313	1.48946			313	2.36375		313	0		313	0
314	1.93737		314	0		314	9.42234			314	2.38503		314	0		314	2.67287
315	1.99619		315	3		315	15.2563			315	2.262		315	1		315	3.90677
316	2.02614		316	30		316	19.1974			316	2.2368		316	22		316	4.97472
317	2.00066		317	21		317	21.2087			317	2.25854		317	10		317	4.859
318	2.00066		318	17		318	17.0897			318	2.25865		318	10		318	4.57198
319	2.01618		319	37		319	12.1415			319	2.23301		319	21		319	3.54312
320	2.15657		320	8		320	2.12739			320	2.15737		320	7		320	1.11527
321	2.13403		321	0		321	0			321	2.15737		321	1		321	0.372772
322	2.10839		322	0		322	0			322	2.14096		322	1		322	0
323	2.10839		323	0		323	8.29687			323	2.13977		323	1		323	0
324	2.11855		324	2		324	12.6339			324	2.05569		324	0		324	0.670321
325	2.13101		325	29		325	14.2741			325	2.00971		325	0		325	1.23665
326	2.21554		326	17		326	7.08282			326	1.90174		326	5		326	1.40267
327	2.21014		327	9		327	2.96951			327	1.91058		327	4		327	0.700504
328	2.30132		328	2		328	0.728493			328	1.89097		328	1		328	0
329	2.36501		329	1		329	0			329	1.90848		329	0		329	0
330	2.3412		330	0		330	0.692278			330	1.90152		330	0		330	0
331	2.478		331	0		331	6.97121			331	1.88287		331	0		331	1.91354
332	2.55491		332	3		332	6.89613			332	1.81581		332	0		332	1.9672
333	2.53407		333	28		333	6.12856			333	1.73615		333	13		333	2.00644
334	2.56039		334	0		334	1.04667			334	1.73463		334	0		334	0
335	2.67997		335	0		335	3.12972			335	1.71241		335	0		335	0
336	2.88852		336	5		336	3.15313			336	1.62456		336	0		336	0
337	3.13079		337	11		337	2.43902			337	1.51389		337	0		337	0
338	3.69474		338	2		338	0.622025			338	1.42467		338	1		338	0.580943
339	3.63962		339	2		339	1.08941			339	1.3911		339	0		339	1.82361
340	3.60826		340	0		340	1.3888			340	1.31534		340	2		340	4.45527
341	3.686		341	5		341	1.35344			341	1.24168		341	7		341	4.1426
342	3.73314		342	4		342	0.590235			342	1.21371		342	12		342	2.78314
343	3.89636		343	0		343	0			343	1.21371		343	0		343	0
344	3.90249		344	0		344	0			344	1.02183		344	0		344	0.818376
345	4.14161		345	1		345	0			345	0.994053		345	2		345	3.71273
346	4.20278		346	0		346	0			346	0.916685		346	1		346	3.26533
347	4.34578		347	0		347	1.53876			347	0.890369		347	10		347	3.00057
348	4.43406		348	2		348	1.62246			348	0.887862		348	0		348	0
349	4.49043		349	10		349	1.44329			349	0.887862		349	0		349	0
350	4.71001		350	1		350	1.28314			350	0.913846		350	1		350	1.72943
351	4.9476		351	1		351	1.14811			351	0.915999		351	0		351	1.4249
352	4.93009		352	9		352	1.46769			352	0.945576		352	5		352	1.39802
353	4.94365		353	0		353	0.438184			353	0.945576		353	0		353	0
354	5.19847		354	4		354	1.92204			354	0.969966		354	0		354	3.22697
355	5.39149		355	0		355	1.70148			355	0.988933		355	0		355	3.63525
356	5.34601		356	14		356	1.71727			356	1.01596		356	12		356	3.55739
357	5.26402		357	2		357	0			357	1.07597		357	2		357	0.741543
358	5.24441		358	0		358	0			358	1.05637		358	0		358	0
359	5.29809		359	0		359	0			359	1.10408		359	1		359	0.726014
360	5.5799		360	0		360	0			360	1.10157		360	1		360	0.737179
361	5.49743		361	0		361	0			361	1.09999		361	1		361	0
362	5.39029		362	1		362	0			362	1.05401		362	1		362	0
363	5.41593		363	0		363	0			363	1.0241		363	0		363	0
364	5.34641		364	0		364	3.18039			364	1.0491		364	0		364	5.6129
365	5.37237		365	2		365	4.65982			365	0.998976		365	2		365	8.30941
366	5.3325		366	28		366	5.6084			366	0.944957		366	19		366	9.32065
367	5.3628		367	14		367	4.23339			367	1.13684		367	11		367	4.99807
368	5.38545		368	11		368	3.08206			368	1.1797		368	8		368	3.0475
369	5.33009		369	15		369	2.37547			369	1.20474		369	3		369	1.47028
370	5.29575		370	3		370	1.65501			370	1.29062		370	3		370	3.06031
371	5.13364		371	4		371	1.36432			371	1.31334		371	1		371	3.03977
372	4.99332		372	8		372	1.04374			372	1.31711		372	11		372	3.44179
373	4.83998		373	0		373	2.11588			373	1.31711		373	3		373	3.67004
374	4.83969		374	1		374	3.55703			374	1.31711		374	3		374	4.33593
375	4.79642		375	17		375	3.84707			375	1.28934		375	12		375	3.76417
376	4.71557		376	12		376	2.5638			376	1.26806		376	6		376	2.73377
377	4.64233		377	3		377	1.7382			377	1.26806		377	0		377	3.17243
378	4.5802		378	6		378	1.38837			378	1.26806		378	7		378	4.06507
379	4.48308		379	5		379	1.79769			379	1.24638		379	8		379	4.11283
380	4.41883		380	0		380	1.70264			380	1.22464		380	4		380	3.4377
381	4.3501		381	9		381	1.73129			381	1.22464		381	7		381	3.18216
382	4.22351		382	4		382	0.950335			382	1.27405		382	5		382	1.68506
383	4.20384		383	0		383	0.414634			383	1.27224		383	3		383	0.632288
384	4.10668		384	3		384	1.00761			384	1.25171		384	0		384	0
385	4.00139		385	0		385	0.622524			385	1.27171		385	0		385	0
386	3.7135		386	4		386	1.70262			386	1.2521		386	0		386	0.852613
387	3.21896		387	0		387	1.50018			387	1.2521		387	1		387	3.62671
388	3.0618		388	6		388	1.7924			388	1.24888		388	3		388	4.51258
389	2.79361		389	2		389	1.05436			389	1.24888		389	13		389	4.1186
390	2.68889		390	1		390	1.10582			390	1.22507		390	5		390	1.5017
391	2.58706		391	2		391	0.936981			391	1.21653		391	1		391	0
392	2.41806		392	2		392	0.993282			392	1.28742		392	1		392	0.62769
393	2.25925		393	0		393	0			393	1.27802		393	0		393	0
394	2.17531		394	2		394	0.825903			394	1.25802		394	2		394	0
395	2.06313		395	0		395	0			395	1.24864		395	0		395	0
396	1.9426		396	1		396	11.6178			396	1.22904		396	0		396	2.43627
397	1.88068		397	1		397	18.1407			397	1.1823		397	2		397	8.32075
398	1.88901		398	37		398	19.6104			398	1.20065		398	9		398	8.19794
399	1.95228		399	23		399	9.69731			399	1.17434		399	26		399	7.19629
400	1.97246		400	7		400	4.75541			400	1.138		400	1		400	1.6541
401	1.86596		401	3		401	5.02072			401	1.1338		401	4		401	1.86841
402	1.88691		402	6		402	4.0213			402	1.11364		402	2		402	1.1613
403	2.00885		403	8		403	11.5018			403	1.17785		403	2		403	5.32099
404	2.02846		404	0		404	9.74584			404	1.15285		404	1		404	5.85927
405	2.02846		405	33		405	9.7186			405	1.12721		405	20		405	5.6574
406	2.05416		406	2		406	0.839308			406	1.13325		406	4		406	0.957798
407	2.04559		407	0		407	0			407	1.13325		407	0		407	0
408	1.98257		408	1		408	0.863358			408	1.07442		408	0		408	0
409	1.95818		409	1		409	2.32334			409	1.0114		409	0		409	2.27948
410	1.97215		410	1		410	2.86566			410	0.92163		410	1		410	3.52723
411	1.92898		411	6		411	2.56346			411	0.874565		411	7		411	3.58083
412	2.03693		412	3		412	1.12473			412	0.925423		412	4		412	1.78332
413	2.00836		413	0		413	0.851942			413	0.88089		413	1		413	2.13034
414	2.00647		414	1		414	1.13949			414	0.88523		414	1		414	1.86905
415	1.97729		415	2		415	0.845074			415	0.862502		415	5		415	1.59591
416	1.98958		416	1		416	1.33461			416	0.820355		416	0		416	0
417	2.07394		417	0		417	1.01708			417	0.823494		417	0		417	0
418	2.31153		418	4		418	0.973066			418	0.887745		418	1		418	0
419	2.30677		419	0		419	0.714293			419	0.902548		419	0		419	0
420	2.37668		420	0		420	0.872546			420	0.922956		420	0		420	0
421	2.46339		421	3		421	1.0101			421	0.945458		421	0		421	0
422	2.96075		422	1		422	0.560196			422	0.900209		422	0		422	1.7106
423	2.99903		423	1		423	0			423	0.943073		423	0		423	1.65028
424	3.15298		424	1		424	0			424	0.962681		424	6		424	2.66001
425	3.23079		425	0		425	0			425	1.00277		425	0		425	1.01571
426	3.2306		426	0		426	0			426	1.04199		426	4		426	0.977458
427	3.34216		427	0		427	0			427	1.10568		427	0		427	0
428	3.42745		428	0		428	0			428	1.12605		428	0		428	0
429	3.49666		429	0		429	0			429	1.14189		429	0		429	0
430	3.72607		430	0		430	0.46678			430	1.13768		430	2		430	0.919656
431	3.61837		431	1		431	0.628641			431	1.1811		431	0		431	0
432	3.59205		432	2		432	0.947055			432	1.16069		432	2		432	0
433	3.61705		433	1		433	0.778325			433	1.13423		433	0		433	0
434	3.57156		434	3		434	1.21969			434	1.15464		434	0		434	1.36072
435	3.74285		435	1		435	1.1905			435	1.19778		435	0		435	1.32974
436	3.84674		436	4		436	1.1795			436	1.17505		436	6		436	1.32359
437	3.84527		437	3		437	0.592795			437	1.2368		437	0		437	0
438	3.84947		438	1		438	0			438	1.21456		438	0		438	0
439	3.78744		439	0		439	0			439	1.19017		439	0		439	0.672635
440	3.76739		440	1		440	0			440	1.16889		440	1		440	0.661046
441	3.71475		441	0		441	0			441	1.20891		441	2		441	0
442	3.73748		442	0		442	0			442	1.25272		442	0		442	0
443	3.6173		443	0		443	0			443	1.25097		443	0		443	0
444	3.6031		444	0		444	0			444	1.20352		444	0		444	0
445	3.69322		445	0		445	0			445	1.26767		445	0		445	0
446	3.78581		446	0		446	0.564245			446	1.33199		446	0		446	0
447	4.02005		447	0		447	0.95039			447	1.45384		447	0		447	0.535975
448	4.25731		448	4		448	1.19149			448	1.47948		448	2		448	0.69006
449	4.25594		449	3		449	0.655578			449	1.5444		449	1		449	0
450	4.34022		450	2		450	0.387637			450	1.61329		450	1		450	0
451	4.38205		451	0		451	0.386194			451	1.61808		451	0		451	0
452	4.4471		452	1		452	0.383302			452	1.61975		452	0		452	0
453	4.38945		453	2		453	0			453	1.64058		453	2		453	0.50006
454	4.48178		454	0		454	0			454	1.60136		454	0		454	0
455	4.45649		455	0		455	0			455	1.55737		455	1		455	0
456	4.39331		456	0		456	0			456	1.53172		456	1		456	0
457	4.37056		457	0		457	0			457	1.53172		457	0		457	0
458	4.43932		458	0		458	0			458	1.53172		458	0		458	0
459	4.43932		459	0		459	0			459	1.53172		459	0		459	0
460	4.43932		460	0		460	0.652337			460	1.50791		460	0		460	0
461	4.32772		461	0		461	0.795043			461	1.50791		461	0		461	0.537806
462	4.27564		462	5		462	1.33661			462	1.48708		462	1		462	1.6364
463	4.23856		463	1		463	1.20808			463	1.46747		463	2		463	1.6521
464	4.21682		464	4		464	4.18071			464	1.44525		464	6		464	1.29192
465	4.22162		465	4		465	4.25043			465	1.44525		465	1		465	0
466	4.17929		466	23		466	5.67531			466	1.44403		466	0		466	0
467	4.00982		467	4		467	2.59235			467	1.44403		467	1		467	0
468	3.80422		468	13		468	2.1617			468	1.40314		468	0		468	0
469	3.34495		469	0		469	0			469	1.38014		469	0		469	0
470	3.08415		470	0		470	0			470	1.31817		470	0		470	0
471	2.80027		471	2		471	0			471	1.3641		471	0		471	0.585056
472	2.65763		472	0		472	0			472	1.36045		472	0		472	0.582846
473	2.40597		473	0		473	0			473	1.37752		473	3		473	0.582165
474	2.42725		474	0		474	0			474	1.37966		474	0		474	0
475	2.22343		475	0		475	0			475	1.36526		475	0		475	0
476	2.17863		476	0		476	0			476	1.32482		476	0		476	0
477	2.13401		477	0		477	0			477	1.28561		477	0		477	0.629517
478	2.03458		478	0		478	1.44713			478	1.28561		478	1		478	1.06713
479	1.96843		479	0		479	3.86659			479	1.24114		479	2		479	2.8379
480	1.87637		480	5		480	4.27211			480	1.22153		480	2		480	2.86859
481	1.87637		481	8		481	3.72891			481	1.20192		481	9		481	2.65735
482	1.82368		482	1		482	1.59681			482	1.20192		482	2		482	1.57829
483	1.77602		483	3		483	2.2773			483	1.20868		483	1		483	1.15696
484	1.72859		484	1		484	1.95214			484	1.13744		484	4		484	1.25303
485	1.72595		485	3		485	1.60985			485	1.11112		485	0		485	0
486	1.77557		486	2		486	0			486	0.943619		486	1		486	0
487	1.78358		487	0		487	0			487	0.917978		487	0		487	0
488	1.75476		488	0		488	0			488	0.89837		488	0		488	0
489	1.71359		489	0		489	0			489	0.94218		489	0		489	0
490	1.63307		490	0		490	0			490	0.898516		490	0		490	0
491	1.5484		491	2		491	0			491	0.876777		491	1		491	0
492	1.54627		492	0		492	0			492	0.698888		492	0		492	0
493	1.43092		493	0		493	0			493	0.700557		493	0		493	0
494	1.31913		494	0		494	0			494	0.750682		494	0		494	0
495	1.34208		495	0		495	0			495	0.753938		495	0		495	0
496	1.23252		496	1		496	0			496	0.773546		496	0		496	0
497	1.21116		497	4		497	0			497	0.671387		497	1		497	0
498	1.1994		498	0		498	0			498	0.698291		498	0		498	3.08519
499	1.22816		499	1		499	0			499	0.697848		499	0		499	3.08202
500	1.2819		500	1		500	0			500	0.67824		500	8		500	3.00822
501	1.28437		501	1		501	0			501	0.700422		501	0		501	0
502	1.3326		502	2		502	3.02528			502	0.74879		502	0		502	0
503	1.48899		503	5		503	2.41466			503	0.800817		503	2		503	1.21339
504	1.67822		504	1		504	0			504	0.852133		504	0		504	1.67407
505	1.76579		505	1		505	0			505	0.984217		505	2		505	1.49581
506	1.9057		506	0		506	0			506	1.03085		506	4		506	0.917524
507	2.53685		507	0		507	0			507	1.19381		507	0		507	0
508	2.71218		508	0		508	0			508	1.2629		508	0		508	0
509	2.73862		509	2		509	0.568428			509	1.27693		509	1		509	0
510	3.11045		510	0		510	0.543454			510	1.32822		510	1		510	0
511	3.13173		511	1		511	1.60376			511	1.32822		511	0		511	0
512	3.15133		512	2		512	1.93769			512	1.4173		512	0		512	0.567259
513	3.26624		513	6		513	1.56278			513	1.4173		513	1		513	0.570107
514	3.24243		514	3		514	0.688603			514	1.39616		514	2		514	0
515	3.29107		515	0		515	1.35606			515	1.39616		515	0		515	0
516	3.35112		516	1		516	2.66778			516	1.39616		516	0		516	0.573542
517	3.39657		517	7		517	3.80202			517	1.40433		517	1		517	0.575224
518	3.45792		518	8		518	7.06523			518	1.38393		518	2		518	0.777535
519	3.43946		519	8		519	8.22483			519	1.38393		519	0		519	2.54948
520	3.45907		520	27		520	8.53459			520	1.34762		520	2		520	2.96621
521	3.65292		521	16		521	4.65428			521	1.34762		521	11		521	2.75245
522	3.65465		522	11		522	2.13572			522	1.35023		522	2		522	0.588868
523	3.66069		523	3		523	0.898604			523	1.37116		523	1		523	1.34919
524	3.83926		524	0		524	0.587299			524	1.35413		524	0		524	1.31672
525	3.86198		525	3		525	0.582665			525	1.42525		525	6		525	1.28077
526	3.88839		526	1		526	0.432746			526	1.4735		526	1		526	0.534494
527	3.93144		527	0		527	0			527	1.4735		527	0		527	0
528	3.97678		528	2		528	0			528	1.54311		528	2		528	0
529	4.13013		529	0		529	0			529	1.64651		529	0		529	0
530	4.21819		530	0		530	0			530	1.74372		530	0		530	0
531	4.30876		531	0		531	0			531	1.83581		531	0		531	0
532	4.28656		532	0		532	0			532	1.90715		532	0		532	0
533	4.80617		533	0		533	0			533	2.08719		533	1		533	0
534	4.85062		534	0		534	0			534	2.1068		534	0		534	0
535	4.85417		535	0		535	0.705277			535	2.13005		535	0		535	0.504518
536	4.83092		536	0		536	0.705168			536	2.10624		536	1		536	0.631004
537	4.79131		537	6		537	1.75615			537	2.10624		537	3		537	1.00626
538	4.85641		538	0		538	1.17042			538	2.12646		538	1		538	0.62955
539	4.88672		539	9		539	1.78622			539	2.1273		539	4		539	1.12626
540	4.79568		540	1		540	0.981807			540	2.09983		540	0		540	0.608577
541	4.60739		541	5		541	0.881366			541	2.16554		541	5		541	0.701296
542	4.46235		542	2		542	0			542	2.30719		542	0		542	0
543	4.4451		543	0		543	0			543	2.37159		543	1		543	0.433786
544	4.40989		544	0		544	1.55291			544	2.44524		544	1		544	1.14998
545	4.35332		545	1		545	1.53724			545	2.55991		545	2		545	1.32862
546	4.3861		546	11		546	1.38525			546	2.64696		546	8		546	1.1185
547	4.54399		547	0		547	0			547	2.62059		547	3		547	0.306253
548	4.58232		548	0		548	0.676582			548	2.59996		548	0		548	0.40883
549	5.26602		549	0		549	0.863165			549	2.61593		549	0		549	0.410655
550	5.24203		550	6		550	1.39278			550	2.61115		550	4		550	1.13352
551	5.26316		551	2		551	1.05765			551	2.56516		551	0		551	0.93706
552	5.37773		552	5		552	1.16135			552	2.5869		552	7		552	1.25885
553	5.44804		553	3		553	0.640725			553	2.53135		553	2		553	0.633892
554	5.29179		554	3		554	0.325813			554	2.50754		554	3		554	0.424728
555	5.19504		555	0		555	0			555	2.53319		555	1		555	0.428039
556	5.18148		556	0		556	2.11474			556	2.49332		556	0		556	1.95357
557	5.15177		557	1		557	3.52216			557	2.44927		557	3		557	2.84692
558	4.95525		558	18		558	3.81758			558	2.42835		558	15		558	2.85852
559	4.86989		559	12		559	1.76069			559	2.42835		559	8		559	1.43111
560	4.88425		560	3		560	0.949314			560	2.41962		560	3		560	0.989214
561	4.74284		561	0		561	0.603195			561	2.41894		561	2		561	0.655777
562	4.71292		562	5		562	0.607856			562	2.43977		562	4		562	0.434706
563	4.6495		563	0		563	0			563	2.46067		563	0		563	0.864655
564	4.6347		564	0		564	0			564	2.46067		564	0		564	0.868805
565	4.70561		565	0		565	0			565	2.48028		565	8		565	0.854109
566	4.6753		566	0		566	0			566	2.42532		566	0		566	0
567	4.6199		567	0		567	0			567	2.58741		567	0		567	0
568	4.70686		568	1		568	0			568	2.4872		568	0		568	0
569	4.58028		569	0		569	0			569	2.5612		569	0		569	0
570	4.54153		570	0		570	0			570	2.59931		570	0		570	0
571	4.61791		571	0		571	0.474309			571	2.67205		571	0		571	0
572	4.6016		572	1		572	0.57264			572	2.68685		572	0		572	0
573	5.13102		573	3		573	0.443484			573	2.70707		573	0		573	0
574	5.12529		574	1		574	0			574	2.57476		574	0		574	0
575	5.09166		575	0		575	0			575	2.52525		575	0		575	0
576	5.41379		576	0		576	0			576	2.56924		576	0		576	0
577	5.47762		577	0		577	0			577	2.57251		577	0		577	0.722734
578	5.42936		578	0		578	0			578	2.57719		578	1		578	1.13965
579	5.44134		579	1		579	0			579	2.59848		579	6		579	1.0646
580	5.46282		580	1		580	0.310858			580	2.54585		580	4		580	0.770969
581	5.14369		581	0		581	0.507178			581	2.37004		581	0		581	0.566634
582	5.81558		582	2		582	0.981965			582	2.34752		582	3		582	0.576605
583	5.81638		583	3		583	1.50358			583	2.34149		583	2		583	1.06347
584	5.69704		584	5		584	2.66296			584	2.24798		584	0		584	1.34258
585	5.46247		585	7		585	2.20384			585	2.18064		585	7		585	1.38873
586	5.45462		586	14		586	2.99139			586	2.12578		586	4		586	4.01026
587	5.29762		587	0		587	2.18788			587	2.03015		587	0		587	4.37101
588	5.17549		588	14		588	2.8842			588	2.02806		588	27		588	5.84807
589	5.0821		589	6		589	1.458			589	1.98144		589	6		589	3.33026
590	5.0821		590	6		590	1.70181			590	2.00944		590	11		590	3.22445
591	5.00817		591	1		591	1.03748			591	2.01452		591	8		591	2.20327
592	4.90823		592	8		592	1.1704			592	1.93041		592	5		592	1.39823
593	4.84518		593	0		593	1.76942			593	1.86448		593	3		593	0.696757
594	4.78555		594	2		594	1.77548			594	1.9265		594	2		594	0.413411
595	4.79474		595	13		595	1.53268			595	1.94976		595	0		595	0.40905
596	4.79594		596	0		596	0			596	1.92896		596	1		596	1.63044
597	4.84247		597	0		597	0			597	1.98839		597	2		597	1.6071
598	4.8739		598	0		598	0.340469			598	1.97048		598	9		598	1.32969
599	5.01899		599	0		599	0.335298			599	2.01448		599	1		599	0
600	5.10095		600	3		600	0.333373			600	2.03131		600	0		600	0
601	5.10515		601	0		601	0			601	2.03131		601	1		601	0
602	5.1069		602	0		602	0			602	2.10055		602	0		602	0
603	5.13935		603	0		603	0			603	2.16066		603	0		603	0
604	5.11975		604	0		604	0			604	2.18983		604	0		604	0
605	5.10201		605	1		605	0			605	2.18563		605	2		605	0
606	5.0789		606	0		606	0			606	2.20256		606	0		606	0
607	4.96426		607	0		607	0			607	2.09126		607	0		607	0
608	4.72441		608	0		608	0			608	2.03561		608	0		608	0
609	4.81791		609	0		609	0			609	2.0039		609	0		609	0
610	4.67765		610	0		610	0			610	1.91217		610	0		610	0
611	4.55644		611	0		611	0			611	1.92638		611	0		611	0
612	4.46303		612	0		612	0			612	1.94766		612	0		612	0
613	4.31367		613	0		613	0			613	1.85178		613	0		613	0
614	4.11516		614	2		614	1.26114			614	1.83238		614	2		614	0.986909
615	4.03879		615	0		615	1.8415			615	1.89791		615	0		615	1.12106
616	3.98965		616	7		616	3.16175			616	1.94385		616	5		616	1.41384
617	3.98426		617	6		617	2.97452			617	1.86699		617	3		617	1.57769
618	3.86645		618	9		618	2.97721			618	1.84738		618	2		618	1.71361
619	3.59077		619	5		619	3.14351			619	1.86327		619	6		619	1.97487
620	3.40236		620	5		620	2.72602			620	1.89141		620	4		620	1.23873
621	3.29195		621	9		621	4.87076			621	1.91645		621	4		621	3.41167
622	3.29327		622	2		622	4.44923			622	2.00441		622	1		622	3.12552
623	3.19684		623	17		623	19.2513			623	1.94124		623	20		623	7.97588
624	3.07135		624	6		624	22.2978			624	1.94124		624	2		624	6.03452
625	3.1013		625	83		625	21.7377			625	1.93493		625	36		625	6.13443
626	3.0614		626	32		626	6.43324			626	1.95681		626	6		626	1.62441
627	2.99616		627	2		627	1.54887			627	1.97664		627	3		627	1.08061
628	2.93573		628	0		628	10.0793			628	1.97625		628	3		628	3.22302
629	2.85722		629	6		629	25.6421			629	1.96954		629	2		629	11.1725
630	2.81716		630	45		630	28.5307			630	2.01121		630	19		630	13.3464
631	2.68716		631	75		631	22.1314			631	2.03388		631	63		631	13.3645
632	2.54743		632	15		632	5.5412			632	2.00882		632	19		632	5.45888
633	2.30046		633	8		633	2.20414			633	2.06287		633	20		633	3.10845
634	2.21517		634	0		634	1.67325			634	2.08328		634	3		634	1.29789
635	2.43257		635	1		635	17.9923			635	2.03041		635	1		635	8.22515
636	2.47106		636	6		636	18.4892			636	2.05003		636	6		636	8.60394
637	2.66247		637	73		637	17.1278			637	2.04696		637	56		637	7.99574
638	2.59738		638	5		638	1.55491			638	2.03958		638	4		638	1.30583
639	2.58879		639	1		639	0			639	2.01656		639	1		639	0.775909
640	2.47441		640	1		640	0			640	2.07009		640	5		640	0.634873
641	2.44159		641	0		641	2.61336			641	2.0995		641	0		641	0
642	2.36654		642	1		642	2.61355			642	2.13073		642	0		642	0
643	2.35435		643	10		643	2.36186			643	2.17568		643	1		643	0
644	2.44107		644	0		644	3.93267			644	2.22927		644	0		644	2.21259
645	2.40925		645	0		645	3.85781			645	2.11952		645	1		645	2.34775
646	2.50549		646	17		646	4.87672			646	2.15926		646	17		646	3.70224
647	2.5838		647	0		647	1.10679			647	2.19536		647	1		647	1.73581
648	2.58722		648	5		648	1.79055			648	2.12779		648	12		648	2.49536
649	2.51628		649	0		649	2.04977			649	2.12901		649	1		649	2.25005
650	2.49931		650	3		650	2.97587			650	2.15496		650	7		650	2.13674
651	2.45589		651	6		651	4.46673			651	2.11574		651	10		651	1.65153
652	2.47839		652	4		652	5.39898			652	2.094		652	0		652	0.901231
653	2.68492		653	10		653	5.02461			653	2.08729		653	3		653	1.43749
654	2.71617		654	11		654	2.6919			654	2.03228		654	4		654	1.05948
655	2.7268		655	3		655	0.528887			655	2.00204		655	4		655	0.658352
656	3.40693		656	0		656	0			656	2.00624		656	0		656	0.64241
657	3.51849		657	0		657	0.406232			657	2.06735		657	1		657	1.88165
658	4.44426		658	1		658	1.25066			658	2.15282		658	4		658	2.47204
659	4.60381		659	2		659	1.23853			659	2.15705		659	10		659	2.21486
660	4.55789		660	7		660	0.994411			660	2.16237		660	6		660	0.986549
661	4.57749		661	1		661	1.36302			661	2.18198		661	2		661	0
662	4.55429		662	0		662	1.47358			662	2.14276		662	0		662	0
663	4.60103		663	10		663	1.60281			663	2.12088		663	0		663	0.989795
664	4.70192		664	2		664	1.28643			664	2.17873		664	2		664	1.99214
665	5.56031		665	2		665	1.11124			665	2.16622		665	6		665	2.03031
666	5.61101		666	8		666	0.902117			666	2.08015		666	8		666	1.29567
667	5.67295		667	1		667	0.397033			667	2.05793		667	2		667	0
668	5.69256		668	0		668	0.29536			668	2.03619		668	0		668	0
669	5.77809		669	3		669	0.28616			669	2.01456		669	0		669	0
670	5.81313		670	0		670	0			670	1.93964		670	0		670	0.418795
671	6.24821		671	0		671	0			671	1.91639		671	0		671	0.425163
672	6.29961		672	1		672	0			672	1.87456		672	3		672	0.432206
673	6.38534		673	0		673	0.449894			673	1.85382		673	0		673	1.17351
674	6.25059		674	0		674	0.543588			674	1.8244		674	0		674	1.34436
675	6.2757		675	5		675	1.17615			675	1.77538		675	8		675	2.27814
676	6.2561		676	1		676	0.813194			676	1.75578		676	1		676	1.5483
677	6.27651		677	7		677	0.900221			677	1.73617		677	6		677	1.42241
678	6.30031		678	1		678	1.79375			678	1.67489		678	3		678	3.22997
679	6.32572		679	2		679	1.7926			679	1.65066		679	0		679	3.26155
680	6.34707		680	17		680	1.71523			680	1.62793		680	17		680	3.44245
681	6.31239		681	1		681	0.2739			681	1.62694		681	3		681	1.16379
682	6.1901		682	1		682	0.826486			682	1.62527		682	1		682	3.5237
683	6.13545		683	1		683	0.736082			683	1.55955		683	3		683	4.24994
684	6.20447		684	7		684	0.647847			684	1.58278		684	17		684	4.52146
685	6.15417		685	0		685	0.470595			685	1.56351		685	5		685	1.67283
686	6.02767		686	0		686	0.480459			686	1.63082		686	5		686	0.835584
687	5.89789		687	5		687	0.491498			687	1.58788		687	0		687	0
688	5.78298		688	0		688	0			688	1.56827		688	0		688	0
689	5.62996		689	0		689	1.04783			689	1.55312		689	0		689	3.4646
690	5.40712		690	0		690	1.63819			690	1.55312		690	1		690	3.69192
691	5.20258		691	10		691	1.6872			691	1.51178		691	19		691	3.74832
692	4.97136		692	5		692	0.57756			692	1.48546		692	1		692	0.538734
693	4.95446		693	0		693	0			693	1.48466		693	1		693	2.17233
694	4.80552		694	0		694	0			694	1.48466		694	1		694	2.0074
695	4.66949		695	0		695	0.753023			695	1.44978		695	10		695	5.44183
696	4.49661		696	0		696	0.768096			696	1.44922		696	0		696	3.68535
697	4.39241		697	6		697	0.777187			697	1.36417		697	19		697	3.76912
698	4.40343		698	0		698	0			698	1.31095		698	0		698	0
699	4.34112		699	0		699	0			699	1.35756		699	0		699	0
700	4.34843		700	0		700	0			700	1.35597		700	0		700	0
701	4.07167		701	0		701	0			701	1.30585		701	0		701	0
702	4.11052		702	0		702	0			702	1.26039		702	0		702	0
703	4.25261		703	0		703	0			703	1.21753		703	0		703	0
704	4.46187		704	0		704	0			704	1.20045		704	0		704	0
705	4.52381		705	0		705	0			705	1.15433		705	0		705	0
706	4.47716		706	0		706	0.385074			706	1.17343		706	0		706	0
707	4.42451		707	1		707	0.38638			707	1.15614		707	0		707	0
708	4.35534		708	2		708	0			708	1.2192		708	0		708	1.27921
709	4.43235		709	0		709	1.00915			709	1.25515		709	2		709	2.32371
710	4.60265		710	0		710	2.01083			710	1.27787		710	4		710	5.66979
711	4.45474		711	8		711	2.65105			711	1.25394		711	5		711	6.68099
712	4.48247		712	8		712	3.34551			712	1.27775		712	18		712	12.1718
713	4.5422		713	5		713	3.09279			713	1.29998		713	9		713	12.3582
714	4.7085		714	14		714	3.25158			714	1.29998		714	32		714	16.7977
715	5.05443		715	7		715	3.79678			715	1.28402		715	19		715	15.0097
716	4.89027		716	7		716	7.6067			716	1.22596		716	29		716	28.5704
717	4.84527		717	19		717	9.09092			717	1.27416		717	23		717	23.9979
718	4.80519		718	39		718	7.69163			718	1.25193		718	82		718	19.3313
719	4.76246		719	19		719	3.07408			719	1.27416		719	9		719	2.23321
720	4.59129		720	6		720	0.886279			720	1.3225		720	2		720	0.59458
721	4.48493		721	0		721	0.650302			721	1.34378		721	0		721	1.5583
722	4.36371		722	1		722	0.660622			722	1.37009		722	1		722	1.71283
723	4.23487		723	4		723	0.532294			723	1.39308		723	7		723	1.49751
724	4.28053		724	0		724	0			724	1.4403		724	1		724	0
725	4.27186		725	0		725	0			725	1.4403		725	0		725	0
726	4.24165		726	0		726	0			726	1.41591		726	0		726	0
727	4.19491		727	0		727	0			727	1.41642		727	0		727	0.788095
728	4.27552		728	0		728	0			728	1.32152		728	0		728	0.806531
729	4.42076		729	2		729	0			729	1.32239		729	4		729	1.01959
730	4.61889		730	0		730	0			730	1.32361		730	0		730	0
731	5.91438		731	0		731	0			731	1.27707		731	1		731	0
732	6.04142		732	0		732	0			732	1.26485		732	0		732	0
733	6.13926		733	0		733	0			733	1.22806		733	1		733	0
734	6.25474		734	0		734	0			734	1.26921		734	1		734	0
735	6.42523		735	1		735	0			735	1.26708		735	0		735	1.15615
736	6.46883		736	0		736	0			736	1.39569		736	0		736	1.45547
737	6.68604		737	0		737	0			737	1.48882		737	6		737	1.41033
738	6.84838		738	0		738	0			738	1.5126		738	2		738	0.855359
739	7.43348		739	0		739	0			739	1.53641		739	0		739	0.489391
740	7.42003		740	0		740	0			740	1.62727		740	3		740	0.619093
741	7.43223		741	0		741	0.234107			741	1.74025		741	0		741	0
742	7.23501		742	0		742	0.634054			742	1.80121		742	1		742	2.21068
743	7.13873		743	3		743	0.717878			743	1.82324		743	0		743	2.37645
744	7.09629		744	5		744	0.958983			744	1.80363		744	14		744	2.41586
745	7.09842		745	1		745	0.880661			745	1.75918		745	2		745	0
746	7.09842		746	6		746	1.6155			746	1.73537		746	0		746	0.912408
747	7.05776		747	4		747	1.47461			747	1.76169		747	0		747	1.95576
748	6.91027		748	10		748	1.33334			748	1.76362		748	6		748	2.82121
749	6.80324		749	4		749	0.505158			749	1.79221		749	7		749	1.88545
750	6.7061		750	2		750	0.25741			750	1.83182		750	6		750	1.13897
751	6.7019		751	0		751	0			751	1.89178		751	0		751	0
752	6.42394		752	1		752	0			752	1.89537		752	2		752	0
753	6.21111		753	0		753	0			753	1.91729		753	0		753	0
754	5.97591		754	0		754	0			754	1.91258		754	0		754	0.414688
755	5.76491		755	0		755	0			755	1.91456		755	1		755	0.41125
756	5.51132		756	0		756	0			756	1.9602		756	2		756	0
757	5.62522		757	0		757	1.40837			757	1.96096		757	0		757	0
758	5.66236		758	1		758	2.12001			758	1.98522		758	0		758	0
759	5.62779		759	13		759	2.03714			759	1.92758		759	0		759	0
760	5.56569		760	7		760	0.719969			760	1.94865		760	0		760	0
761	5.51278		761	0		761	0			761	1.96539		761	0		761	0
762	5.46601		762	0		762	0			762	2.05533		762	0		762	0
763	5.44879		763	1		763	0.636422			763	2.1491		763	2		763	0.348633
764	5.38364		764	0		764	0.540032			764	2.28078		764	0		764	0
765	5.2102		765	5		765	0.550924			765	2.45398		765	1		765	0
766	5.16122		766	0		766	0			766	2.52106		766	0		766	0
767	5.07215		767	0		767	0			767	2.56506		767	0		767	0
768	5.08702		768	0		768	0			768	2.58713		768	0		768	0
769	4.82621		769	0		769	0			769	2.66703		769	0		769	0
770	4.62033		770	0		770	0			770	2.82503		770	0		770	0
771	4.47395		771	0		771	0.395383			771	2.83607		771	0		771	0
772	4.31619		772	1		772	0.553007			772	2.85894		772	2		772	0.370971
773	4.12123		773	2		773	0.440943			773	2.9118		773	0		773	0
774	3.8709		774	1		774	0			774	2.85508		774	2		774	0
775	3.58518		775	0		775	0			775	2.92495		775	0		775	0
776	3.41735		776	0		776	0.51272			776	2.91203		776	0		776	0
777	3.34727		777	1		777	0.541585			777	2.97418		777	1		777	0
778	3.19195		778	2		778	1.16136			778	2.95243		778	0		778	0
779	2.88671		779	0		779	1.02551			779	3.06315		779	0		779	0
780	2.71264		780	4		780	1.95691			780	3.04244		780	2		780	0.351226
781	2.69722		781	1		781	2.04422			781	3.01924		781	0		781	0.438472
782	2.41615		782	4		782	2.11328			782	3.04905		782	2		782	0.700373
783	2.37838		783	4		783	2.35714			783	3.05409		783	3		783	0.793211
784	2.45242		784	1		784	1.6554			784	3.03464		784	3		784	0.53484
785	2.38831		785	5		785	2.88097			785	2.98809		785	3		785	0.538593
786	2.35484		786	1		786	2.23125			786	2.9517		786	0		786	0.359599
787	2.34466		787	6		787	2.83006			787	2.97211		787	3		787	0.625919
788	2.16429		788	2		788	2.13916			788	2.97476		788	1		788	0.444451
789	2.10507		789	3		789	1.90601			789	2.99976		789	3		789	0.354493
790	2.09442		790	3		790	1.0712			790	3.02513		790	1		790	0
791	2.04995		791	1		791	0			791	3.00187		791	0		791	0
792	2.20979		792	0		792	0			792	3.00829		792	0		792	0
793	2.3815		793	0		793	0			793	2.96908		793	0		793	0
794	2.47214		794	0		794	1.37666			794	3.01521		794	0		794	0.263656
795	2.47214		795	1		795	2.54937			795	3.00773		795	2		795	0.34914
796	2.47214		796	5		796	2.62263			796	3.07963		796	1		796	0
797	2.39796		797	5		797	1.46615			797	3.0778		797	1		797	0
798	2.26704		798	1		798	0			798	3.12244		798	0		798	0
799	2.29874		799	0		799	0			799	3.13666		799	0		799	0.335351
800	2.3501		800	0		800	1.45589			800	3.18171		800	1		800	0.497985
801	2.36863		801	2		801	1.46294			801	3.22365		801	3		801	0.412665
802	2.29407		802	4		802	1.20589			802	3.23324		802	2		802	0.249798
803	2.31629		803	0		803	0			803	3.23597		803	0		803	0
804	2.44521		804	1		804	2.25748			804	3.13833		804	1		804	0.346035
805	2.35174		805	0		805	1.94868			805	3.09606		805	0		805	0.352339
806	2.74085		806	9		806	1.78179			806	3.01301		806	3		806	0.449272
807	2.76649		807	0		807	0			807	2.97287		807	1		807	0
808	3.08787		808	0		808	0.918564			808	2.9172		808	1		808	0.742269
809	3.08837		809	0		809	0.923584			809	2.87438		809	0		809	0.9475
810	3.0863		810	5		810	4.65433			810	2.83042		810	7		810	2.2118
811	3.03752		811	0		811	4.68981			811	2.73826		811	3		811	2.25863
812	3.01631		812	20		812	5.08742			812	2.75014		812	13		812	2.77494
813	3.01714		813	5		813	1.87924			813	2.65794		813	7		813	1.71812
814	2.99754		814	2		814	5.45259			814	2.66398		814	8		814	3.28017
815	3.04028		815	3		815	5.44359			815	2.59353		815	2		815	3.14917
816	3.0125		816	24		816	4.92421			816	2.54679		816	22		816	2.98015
817	3.0125		817	2		817	0.7649			817	2.48055		817	6		817	0.653674
818	2.95974		818	0		818	0			818	2.48889		818	0		818	0
819	2.92641		819	2		819	1.00047			819	2.37349		819	0		819	0.831566
820	2.81688		820	0		820	3.0886			820	2.21108		820	0		820	4.48189
821	2.76092		821	3		821	5.58572			821	2.14955		821	7		821	5.44917
822	2.68636		822	12		822	5.95417			822	2.24358		822	30		822	5.56553
823	2.77806		823	12		823	3.62709			823	2.21322		823	8		823	1.97961
824	2.82351		824	5		824	2.00658			824	2.29891		824	9		824	1.13672
825	2.84312		825	1		825	1.00269			825	2.35773		825	0		825	0
826	2.81371		826	4		826	1.01114			826	2.381		826	1		826	0.338328
827	2.82855		827	0		827	0			827	2.35923		827	0		827	0
828	2.77221		828	1		828	0			828	2.35332		828	2		828	0
829	2.72557		829	0		829	1.05771			829	2.30393		829	0		829	0
830	2.65343		830	0		830	1.73074			830	2.2809		830	0		830	0.831367
831	2.66499		831	5		831	1.98557			831	2.21391		831	2		831	0.819371
832	2.5471		832	3		832	3.41175			832	2.24092		832	5		832	1.60383
833	2.50097		833	1		833	3.69202			833	2.37952		833	0		833	1.46499
834	2.43335		834	11		834	3.5703			834	2.3627		834	9		834	1.4653
835	2.44006		835	4		835	0.976276			835	2.35666		835	4		835	0.447396
836	2.27577		836	0		836	0			836	2.37799		836	0		836	0
837	2.25616		837	0		837	0			837	2.41768		837	0		837	0
838	2.18643		838	0		838	0			838	2.40312		838	0		838	0
839	2.12929		839	1		839	0			839	2.37696		839	0		839	0
840	1.96552		840	0		840	0			840	2.33501		840	0		840	0
841	1.8842		841	0		841	0			841	2.26188		841	0		841	0
842	1.76277		842	0		842	5.02748			842	2.11208		842	1		842	1.83945
843	1.67102		843	1		843	9.27249			843	2.03415		843	1		843	2.80273
844	1.64324		844	14		844	13.9484			844	1.94239		844	12		844	4.54562
845	1.64066		845	12		845	11.2841			845	2.01747		845	8		845	3.43434
846	1.59592		846	14		846	7.68295			846	2.02377		846	14		846	2.39562
847	1.58905		847	6		847	2.97777			847	2.0151		847	4		847	0.660739
848	1.46618		848	1		848	0			848	1.97196		848	0		848	0
849	1.51638		849	1		849	0			849	2.06663		849	1		849	0
850	1.49337		850	0		850	0			850	2.08255		850	0		850	0
851	1.58183		851	0		851	0			851	2.1348		851	0		851	0
852	1.60873		852	0		852	0			852	2.21488		852	0		852	0
853	1.79526		853	0		853	1.21072			853	2.3324		853	1		853	0.332464
854	1.89255		854	0		854	2.68092			854	2.42832		854	0		854	0.434516
855	1.93413		855	4		855	2.70301			855	2.45794		855	2		855	0.536246
856	1.88584		856	5		856	1.83052			856	2.47808		856	2		856	0.424156
857	1.84587		857	0		857	0.925945			857	2.52307		857	1		857	0.630937
858	1.84587		858	1		858	2.17014			858	2.54307		858	1		858	1.15394
859	1.82148		859	2		859	10.5808			859	2.54141		859	4		859	4.81039
860	1.82148		860	4		860	11.5585			860	2.54141		860	6		860	4.72043
861	1.82504		861	28		861	10.5506			861	2.56712		861	36		861	4.1458
862	1.80065		862	5		862	2.47721			862	2.51772		862	3		862	0.432045
863	1.85796		863	1		863	0.895293			863	2.44067		863	0		863	0
864	1.83675		864	2		864	4.94284			864	2.44807		864	1		864	0.860985
865	2.00727		865	0		865	9.08516			865	2.4708		865	0		865	3.08545
866	2.00849		866	15		866	11.5001			866	2.51429		866	7		866	3.82509
867	1.97783		867	17		867	7.18936			867	2.5339		867	22		867	3.03321
868	1.93237		868	8		868	4.29242			868	2.69		868	8		868	1.76548
869	2.00704		869	0		869	4.52181			869	2.68833		869	0		869	2.13947
870	2.00704		870	7		870	4.55465			870	2.77788		870	10		870	2.13978
871	2.00704		871	9		871	2.57939			871	2.75993		871	12		871	1.19003
872	1.96362		872	0		872	1.15399			872	2.68714		872	0		872	0
873	1.96672		873	0		873	2.57132			873	2.61974		873	0		873	0
874	1.96794		874	4		874	5.65963			874	2.57235		874	2		874	1.25301
875	2.02136		875	5		875	5.32701			875	2.55038		875	0		875	1.48484
876	2.02398		876	11		876	4.4985			876	2.53865		876	10		876	1.69386
877	2.02398		877	3		877	4.25308			877	2.45368		877	4		877	0.839276
878	2.00437		878	2		878	6.34836			878	2.56421		878	2		878	1.41422
879	1.97312		879	10		879	7.301			879	2.60755		879	2		879	1.58305
880	1.9195		880	10		880	27.2756			880	2.74763		880	10		880	6.14273
881	1.93414		881	5		881	24.6636			881	2.73029		881	4		881	5.64282
882	1.94836		882	78		882	23.5109			882	2.7267		882	49		882	5.20043
883	1.91302		883	1		883	0			883	2.76565		883	5		883	0.477485
884	1.8564		884	0		884	0			884	2.81446		884	0		884	0
885	1.82699		885	0		885	3.18905			885	2.79692		885	0		885	0
886	1.79914		886	1		886	4.85684			886	2.65075		886	1		886	0
887	1.70978		887	9		887	4.50231			887	2.61959		887	0		887	0
888	1.74649		888	5		888	1.56503			888	2.65381		888	1		888	0
889	1.83502		889	0		889	0			889	2.71943		889	0		889	0
890	1.85495		890	0		890	0			890	2.59329		890	0		890	0
891	1.85273		891	0		891	0			891	2.50191		891	0		891	0.431359
892	1.8161		892	0		892	0			892	2.48015		892	0		892	0.435517
893	1.9147		893	2		893	0			893	2.43617		893	4		893	0.441573
894	1.89158		894	0		894	0			894	2.43109		894	0		894	0
895	2.01842		895	0		895	0			895	2.37937		895	0		895	0
896	2.06746		896	0		896	0			896	2.42534		896	0		896	0
897	2.10378		897	0		897	0			897	2.47026		897	0		897	0.331271
898	2.08346		898	0		898	0			898	2.41144		898	2		898	1.45907
899	2.71056		899	0		899	0			899	2.36295		899	1		899	1.252
900	2.71317		900	1		900	0.567119			900	2.35327		900	10		900	1.60516
901	2.75226		901	0		901	0			901	2.31239		901	0		901	1.26512
902	3.5361		902	2		902	0			902	2.31167		902	4		902	1.47008
903	3.53096		903	0		903	0			903	2.33161		903	7		903	1.56116
904	3.67225		904	0		904	0			904	2.431		904	2		904	0.771994
905	3.85913		905	0		905	0			905	2.41139		905	5		905	0.554888
906	3.95664		906	0		906	0			906	2.41139		906	0		906	0
907	4.02566		907	0		907	0			907	2.38571		907	0		907	0
908	4.20673		908	0		908	0			908	2.36071		908	1		908	0
909	4.31887		909	0		909	0			909	2.35873		909	0		909	0
910	4.40431		910	0		910	0.381735			910	2.37833		910	0		910	0.901237
911	4.42034		911	1		911	0.376358			911	2.37572		911	0		911	1.35323
912	4.54833		912	2		912	0			912	2.34713		912	8		912	2.24328
913	4.59539		913	0		913	0.369246			913	2.37113		913	4		913	1.77377
914	4.5702		914	0		914	0.855016			914	2.414		914	8		914	3.53159
915	4.65971		915	3		915	0.848218			915	2.43095		915	4		915	2.99269
916	4.70145		916	4		916	0.604917			916	2.40373		916	20		916	2.90163
917	4.68184		917	0		917	0			917	2.38274		917	3		917	0.783355
918	4.68184		918	1		918	0.481774			918	2.38173		918	3		918	0.450439
919	4.68184		919	1		919	0.321814			919	2.3841		919	1		919	0
920	4.7645		920	2		920	0			920	2.33817		920	0		920	0
921	6.41664		921	0		921	0			921	2.31325		921	0		921	0
922	6.3857		922	0		922	0			922	2.2817		922	0		922	0.584693
923	6.41202		923	0		923	0.445683			923	2.30609		923	0		923	0.925809
924	6.37976		924	2		924	0.447039			924	2.25324		924	5		924	0.92508
925	6.29855		925	3		925	0.26926			925	2.35337		925	3		925	0.347497
926	6.35411		926	0		926	0			926	2.31154		926	0		926	0
927	6.3065		927	0		927	0			927	2.24146		927	0		927	0
928	6.34124		928	0		928	0			928	2.20948		928	0		928	0
929	6.31624		929	0		929	0			929	2.14526		929	0		929	0
930	6.40022		930	0		930	0			930	2.19591		930	0		930	0
931	6.29833		931	0		931	0			931	2.17942		931	0		931	0
932	6.21881		932	0		932	1.21574			932	2.17569		932	1		932	2.95341
933	6.06996		933	0		933	1.25005			933	2.18006		933	1		933	2.99074
934	5.90707		934	13		934	1.69843			934	2.14505		934	22		934	5.03758
935	5.71938		935	0		935	1.58095			935	2.09456		935	1		935	3.06188
936	5.40575		936	4		936	1.67888			936	2.11249		936	17		936	2.9067
937	5.02005		937	11		937	1.28915			937	2.06345		937	6		937	0.997508
938	4.77758		938	0		938	0			938	2.15411		938	0		938	0
939	4.72207		939	0		939	0			939	2.19828		939	2		939	0
940	4.58695		940	0		940	0			940	2.1586		940	0		940	0
941	4.447		941	0		941	0			941	2.1813		941	0		941	0
942	4.32825		942	0		942	0			942	2.24013		942	0		942	0
943	4.24224		943	0		943	0			943	2.20411		943	1		943	0
944	4.12142		944	1		944	0.427274			944	2.1716		944	0		944	0
945	3.95609		945	1		945	0.585733			945	2.08039		945	0		945	1.03492
946	3.87017		946	1		946	0.445499			946	2.0833		946	2		946	1.30119
947	3.79437		947	2		947	0.452638			947	2.0202		947	6		947	1.31072
948	3.79437		948	0		948	0			948	2.04459		948	2		948	0.658353
949	3.68944		949	1		949	1.08269			949	2.03858		949	2		949	1.85172
950	3.64483		950	0		950	1.56162			950	1.99245		950	1		950	1.73051
951	3.66756		951	6		951	1.58752			951	2.01724		951	11		951	1.59596
952	3.58431		952	4		952	0.810987			952	1.99997		952	1		952	0
953	3.46704		953	0		953	0			953	1.99784		953	0		953	0
954	3.43985		954	1		954	0.542885			954	1.99784		954	1		954	0
955	3.24041		955	1		955	1.42578			955	2.06947		955	1		955	0
956	2.72309		956	1		956	1.65187			956	2.09265		956	0		956	0
957	2.39089		957	5		957	1.63354			957	2.18181		957	0		957	0
958	2.09696		958	1		958	0			958	2.2027		958	1		958	0
959	1.76232		959	0		959	0			959	2.19533		959	0		959	0
960	1.48822		960	0		960	0			960	2.20208		960	0		960	0
961	1.26133		961	0		961	0			961	2.18156		961	0		961	0
962	1.18577		962	0		962	0			962	2.32196		962	0		962	0
963	1.1837		963	0		963	0			963	2.29644		963	0		963	0
964	1.15228		964	0		964	0			964	2.19915		964	0		964	0
965	1.20995		965	0		965	0			965	2.20589		965	0		965	0
966	1.16722		966	2		966	0			966	2.23275		966	1		966	0.475033
967	1.16722		967	1		967	0			967	2.25236		967	1		967	0.473691
968	1.14595		968	1		968	0			968	2.2511		968	2		968	0.479738
969	1.04828		969	2		969	0			969	2.25184		969	1		969	0.361829
970	1.04157		970	0		970	0			970	2.16721		970	1		970	0.974239
971	0.960233		971	0		971	0			971	2.21375		971	1		971	0.974048
972	0.878682		972	4		972	0			972	2.18811		972	6		972	1.7107
973	0.878682		973	6		973	0			973	2.1685		973	1		973	2.21158
974	0.878682		974	7		974	0			974	2.19024		974	7		974	2.72998
975	0.828682		975	1		975	0			975	2.15227		975	10		975	2.154
976	0.787129		976	3		976	0			976	2.10428		976	5		976	1.1621
977	0.757718		977	0		977	0			977	2.05713		977	2		977	0.905413
978	0.680086		978	5		978	0			978	2.03413		978	2		978	0.635699
979	0.659678		979	1		979	0			979	2.09361		979	3		979	0.487186
980	0.709803		980	1		980	0			980	2.16439		980	0		980	0.352346
981	0.690195		981	4		981	0			981	2.31017		981	1		981	0.344772
982	0.656351		982	1		982	0			982	2.33676		982	2		982	0
983	0.705371		983	1		983	0			983	2.31403		983	0		983	0.353523
984	0.705371		984	3		984	0			984	2.24733		984	0		984	0.360097
985	0.705371		985	3		985	0			985	2.22729		985	3		985	1.34038
986	0.711872		986	0		986	0			986	2.19011		986	0		986	1.23168
987	0.68246		987	2		987	0			987	2.14777		987	8		987	1.37688
988	0.643773		988	0		988	0			988	2.15718		988	2		988	1.27701
989	0.699717		989	5		989	0			989	2.08616		989	1		989	1.44133
990	0.728289		990	8		990	0			990	2.02116		990	7		990	1.29876
991	0.728289		991	3		991	0			991	1.99798		991	3		991	1.40013
992	0.770624		992	1		992	0			992	2.14044		992	0		992	1.09837
993	0.746234		993	4		993	0			993	2.14654		993	8		993	1.07027
994	0.724957		994	4		994	0			994	2.26803		994	1		994	0.807612
995	0.746762		995	0		995	0			995	2.31256		995	0		995	0.902426
996	0.721762		996	6		996	0			996	2.35327		996	6		996	0.877546
997	0.693191		997	0		997	0			997	2.42599		997	2		997	0
998	0.712799		998	0		998	0			998	2.51363		998	0		998	0
999	0.712799		999	1		999	0			999	2.5967		999	0		999	0
1000	0.655656		1000	0		1000	0			1000	2.65885		1000	0		1000	0.902803
1001	0.702291		1001	1		1001	0			1001	2.65592		1001	0		1001	1.11301
1002	0.705138		1002	9		1002	0			1002	2.66021		1002	9		1002	1.11482
1003	0.807367		1003	1		1003	0			1003	2.59015		1003	2		1003	0.602012
1004	1.17317		1004	1		1004	0			1004	2.64313		1004	0		1004	0.987119
1005	1.17317		1005	1		1005	0			1005	2.73979		1005	4		1005	1.07916
1006	1.17317		1006	20		1006	0			1006	2.72127		1006	6		1006	2.56395
1007	1.13396		1007	3		1007	0			1007	2.69326		1007	1		1007	2.0671
1008	1.08896		1008	2		1008	0			1008	2.69775		1008	19		1008	1.97562
1009	1.06722		1009	0		1009	0			1009	2.73613		1009	1		1009	0.299901
1010	1.04158		1010	0		1010	0			1010	2.66467		1010	0		1010	0.304976
1011	1.04158		1011	8		1011	0			1011	2.60165		1011	2		1011	0.303897
1012	1.13994		1012	0		1012	0			1012	2.60296		1012	1		1012	0
1013	1.24066		1013	0		1013	0			1013	2.69261		1013	0		1013	0.70773
1014	1.24066		1014	3		1014	0			1014	2.63756		1014	1		1014	1.02277
1015	1.21582		1015	3		1015	0			1015	2.58227		1015	6		1015	6.70036
1016	1.18641		1016	2		1016	0			1016	2.60187		1016	3		1016	10.8018
1017	1.157		1017	12		1017	0			1017	2.57645		1017	56		1017	23.1399
1018	1.13068		1018	0		1018	0			1018	2.5239		1018	45		1018	18.0293
1019	1.10985		1019	0		1019	0			1019	2.53996		1019	120		1019	15.023
1020	1.10985		1020	2		1020	0			1020	2.52361		1020	6		1020	3.19469
1021	1.13902		1021	3		1021	0			1021	2.49797		1021	16		1021	3.39155
1022	1.11348		1022	6		1022	0			1022	2.49071		1022	8		1022	2.1088
1023	1.15947		1023	3		1023	0			1023	2.5593		1023	8		1023	1.44139
1024	1.17987		1024	1		1024	0			1024	2.53708		1024	4		1024	0.921404
1025	1.3256		1025	1		1025	0			1025	2.67372		1025	2		1025	0.607342
1026	1.3456		1026	7		1026	0			1026	2.60318		1026	3		1026	0.402759
1027	1.3456		1027	2		1027	0			1027	2.6262		1027	1		1027	0.393967
1028	1.33957		1028	1		1028	0			1028	2.71563		1028	0		1028	0.289968
1029	1.3814		1029	10		1029	0			1029	2.78048		1029	3		1029	0.287713
1030	1.3814		1030	0		1030	0			1030	2.78048		1030	0		1030	0
1031	1.37942		1031	0		1031	0			1031	2.78048		1031	0		1031	0
1032	1.37942		1032	1		1032	0			1032	2.74127		1032	0		1032	0
1033	1.37942		1033	1		1033	0			1033	2.78235		1033	1		1033	0
1034	1.35981		1034	0		1034	0			1034	2.82196		1034	1		1034	0
1035	1.38838		1035	0		1035	0			1035	2.77005		1035	0		1035	0
1036	1.36566		1036	1		1036	0			1036	2.79503		1036	0		1036	0.391682
1037	1.46045		1037	1		1037	3.13125			1037	2.69424		1037	0		1037	0.992581
1038	1.41017		1038	5		1038	10.5945			1038	2.68043		1038	4		1038	3.75187
1039	1.4769		1039	2		1039	11.3609			1039	2.68494		1039	6		1039	4.23707
1040	1.61019		1040	21		1040	11.5316			1040	2.52384		1040	27		1040	4.46721
1041	1.55613		1041	8		1041	5.64193			1041	2.53224		1041	8		1041	2.46374
1042	1.55573		1042	3		1042	3.43182			1042	2.46522		1042	7		1042	2.49975
1043	1.71385		1043	5		1043	2.36502			1043	2.47069		1043	8		1043	1.75433
1044	1.68885		1044	2		1044	0			1044	2.42465		1044	8		1044	0.900275
1045	1.63383		1045	0		1045	2.03294			1045	2.40073		1045	0		1045	0.580787
1046	1.69419		1046	0		1046	2.64999			1046	2.28338		1046	0		1046	0.966129
1047	1.69419		1047	6		1047	4.95649			1047	2.20293		1047	5		1047	1.74006
1048	1.74869		1048	2		1048	4.31147			1048	2.13791		1048	3		1048	1.14038
1049	1.70686		1049	7		1049	4.35798			1049	2.09557		1049	6		1049	0.775466
1050	1.67526		1050	4		1050	2.04317			1050	2.08006		1050	0		1050	0
1051	1.69395		1051	2		1051	4.41307			1051	2.01405		1051	0		1051	1.97278
1052	1.62786		1052	0		1052	6.11414			1052	1.97794		1052	1		1052	2.21639
1053	1.69089		1053	11		1053	6.67445			1053	2.09064		1053	14		1053	2.18455
1054	1.69089		1054	7		1054	4.60319			1054	2.06738		1054	2		1054	0.514067
1055	1.7172		1055	2		1055	2.59174			1055	2.06738		1055	1		1055	1.29379
1056	1.76724		1056	5		1056	2.50172			1056	2.08996		1056	1		1056	1.31136
1057	1.76808		1057	1		1057	5.79145			1057	2.0259		1057	8		1057	3.61422
1058	1.90622		1058	2		1058	5.97674			1058	1.98452		1058	1		1058	2.5803
1059	1.90829		1059	16		1059	5.25484			1059	1.96583		1059	18		1059	3.02072
1060	1.87972		1060	2		1060	0.870798			1060	1.94029		1060	0		1060	0.691189
1061	2.04084		1061	0		1061	2.01968			1061	1.92016		1061	4		1061	1.81019
1062	1.94181		1062	1		1062	2.31591			1062	1.92655		1062	1		1062	1.40233
1063	1.91507		1063	6		1063	6.57081			1063	1.89843		1063	8		1063	3.81952
1064	2.02122		1064	1		1064	7.79509			1064	1.87969		1064	1		1064	4.58643
1065	2.02003		1065	16		1065	8.171			1065	1.87691		1065	18		1065	7.20123
1066	2.07107		1066	11		1066	5.35036			1066	1.82496		1066	13		1066	5.39255
1067	2.15653		1067	3		1067	2.38435			1067	1.74152		1067	18		1067	3.43054
1068	2.13327		1068	6		1068	1.55319			1068	1.62575		1068	4		1068	0.613245
1069	2.13327		1069	0		1069	2.51471			1069	1.76299		1069	0		1069	0.590468
1070	2.30695		1070	0		1070	4.36128			1070	1.82928		1070	0		1070	1.03038
1071	2.32656		1071	10		1071	5.24874			1071	1.82703		1071	4		1071	1.93257
1072	2.38958		1072	8		1072	2.83853			1072	1.77844		1072	3		1072	1.35471
1073	2.41629		1073	4		1073	1.6569			1073	1.77583		1073	6		1073	1.35965
1074	2.38791		1074	0		1074	1.43437			1074	1.7604		1074	0		1074	0.603715
1075	2.38485		1075	3		1075	2.89682			1075	1.75912		1075	3		1075	1.64668
1076	2.34524		1076	3		1076	2.22661			1076	1.78086		1076	1		1076	1.1839
1077	2.31893		1077	6		1077	1.53228			1077	1.80397		1077	7		1077	1.03201
1078	2.21392		1078	0		1078	0			1078	1.8209		1078	0		1078	0
1079	2.13034		1079	0		1079	0			1079	1.80129		1079	0		1079	0
1080	2.18759		1080	0		1080	0			1080	1.73412		1080	0		1080	0
1081	2.20887		1081	1		1081	1.88874			1081	1.77558		1081	1		1081	0.594179
1082	2.5029		1082	0		1082	1.57326			1082	1.79513		1082	1		1082	0.447605
1083	2.49576		1083	7		1083	3.21544			1083	1.81474		1083	2		1083	0
1084	2.57258		1084	0		1084	1.64226			1084	1.75188		1084	0		1084	0
1085	2.86983		1085	8		1085	1.58966			1085	1.81474		1085	0		1085	0
1086	2.84688		1086	0		1086	0			1086	1.83741		1086	0		1086	0
1087	2.84688		1087	0		1087	0.600656			1087	1.99505		1087	0		1087	0.394078
1088	2.79578		1088	1		1088	1.1984			1088	2.02685		1088	1		1088	0.387768
1089	2.85628		1089	2		1089	0.953594			1089	2.06812		1089	2		1089	0
1090	2.86753		1090	3		1090	0.899033			1090	2.09415		1090	0		1090	0
1091	3.19847		1091	0		1091	0.678443			1091	2.11163		1091	0		1091	0
1092	3.39775		1092	2		1092	0.660253			1092	2.1832		1092	0		1092	0
1093	3.43643		1093	2		1093	1.63268			1093	2.16577		1093	0		1093	0.368046
1094	3.47488		1094	0		1094	1.96354			1094	2.16769		1094	0		1094	0.487291
1095	3.5111		1095	8		1095	1.72383			1095	2.1873		1095	3		1095	0.486525
1096	5.14673		1096	6		1096	2.73638			1096	2.21177		1096	1		1096	2.29313
1097	5.162		1097	0		1097	2.49159			1097	2.17803		1097	0		1097	2.65381
1098	5.23779		1098	19		1098	2.45817			1098	2.23852		1098	18		1098	2.84013
1099	5.30821		1099	4		1099	1.05218			1099	2.21527		1099	4		1099	1.29751
1100	5.37556		1100	0		1100	0.725108			1100	2.30631		1100	2		1100	0.937774
1101	5.48879		1101	6		1101	0.714088			1101	2.26047		1101	5		1101	0.820916
1102	5.56288		1102	1		1102	0.302704			1102	2.25773		1102	1		1102	0.468848
1103	5.62906		1103	0		1103	2.58747			1103	2.30328		1103	1		1103	2.80009
1104	5.67251		1104	2		1104	2.48252			1104	2.26407		1104	2		1104	2.90413
1105	5.79728		1105	24		1105	2.19981			1105	2.2894		1105	21		1105	2.62983
1106	6.35193		1106	0		1106	0			1106	2.3331		1106	2		1106	0
1107	6.41578		1107	0		1107	0.615871			1107	2.37399		1107	0		1107	0
1108	6.48708		1108	0		1108	0.614712			1108	2.414		1108	0		1108	0
1109	6.43806		1109	7		1109	0.614421			1109	2.43574		1109	0		1109	0
1110	6.45228		1110	0		1110	0			1110	2.41781		1110	0		1110	0
1111	6.49624		1111	0		1111	0			1111	2.45967		1111	0		1111	0
1112	6.55102		1112	0		1112	0			1112	2.41203		1112	0		1112	0
1113	6.62063		1113	0		1113	0.342589			1113	2.32967		1113	0		1113	0.350581
1114	6.59431		1114	0		1114	0.427285			1114	2.17188		1114	0		1114	0.343185
1115	6.65312		1115	4		1115	2.13529			1115	2.34406		1115	3		1115	0.328059
1116	6.66486		1116	1		1116	1.7949			1116	2.47721		1116	0		1116	0
1117	6.60489		1117	20		1117	1.78901			1117	2.49433		1117	0		1117	0
1118	6.63921		1118	0		1118	0			1118	2.51874		1118	0		1118	0
1119	6.73039		1119	1		1119	0			1119	2.51874		1119	0		1119	0
1120	6.6953		1120	0		1120	0.423941			1120	2.53642		1120	1		1120	0
1121	6.6961		1121	0		1121	0.679125			1121	2.55875		1121	0		1121	0
1122	6.67797		1122	5		1122	0.764436			1122	2.52867		1122	0		1122	0
1123	6.67109		1123	3		1123	0.680032			1123	2.55299		1123	2		1123	0.62615
1124	6.68506		1124	1		1124	0.520939			1124	2.52715		1124	0		1124	0.415666
1125	6.66225		1125	4		1125	0.446142			1125	2.58558		1125	4		1125	0.62058
1126	6.25169		1126	1		1126	0.464103			1126	2.58558		1126	0		1126	0.520295
1127	6.15672		1127	0		1127	0.476321			1127	2.56336		1127	2		1127	0.529721
1128	5.92424		1128	4		1128	0.594091			1128	2.53882		1128	3		1128	0.323951
1129	5.78142		1129	1		1129	0.412453			1129	2.44878		1129	0		1129	0
1130	5.48006		1130	1		1130	0.425882			1130	2.42074		1130	0		1130	0
1131	5.24121		1131	2		1131	0.325116			1131	2.42187		1131	2		1131	0
1132	5.26105		1132	1		1132	0			1132	2.35373		1132	0		1132	0
1133	5.19962		1133	0		1133	0			1133	2.33412		1133	0		1133	0
1134	5.09887		1134	1		1134	0			1134	2.26776		1134	0		1134	0
1135	4.96915		1135	0		1135	1.294			1135	2.25082		1135	0		1135	1.55847
1136	4.83866		1136	1		1136	1.45401			1136	2.21831		1136	0		1136	1.67314
1137	4.65747		1137	10		1137	1.39714			1137	2.20393		1137	13		1137	1.66337
1138	4.54763		1138	1		1138	0.671604			1138	2.2716		1138	1		1138	0
1139	4.19232		1139	0		1139	1.80963			1139	2.25764		1139	0		1139	0.835493
1140	3.92858		1140	4		1140	2.95035			1140	2.19886		1140	1		1140	0.847712
1141	4.10336		1141	9		1141	5.04015			1141	2.24597		1141	6		1141	1.3579
1142	4.08003		1142	8		1142	3.85712			1142	2.16103		1142	0		1142	0.635538
1143	3.97086		1143	19		1143	2.7815			1143	2.07346		1143	5		1143	0.648213
1144	3.8607		1144	0		1144	0			1144	2.05924		1144	0		1144	0
1145	3.79213		1145	0		1145	0			1145	2.03797		1145	0		1145	0
1146	3.48997		1146	0		1146	0.802401			1146	2.2016		1146	0		1146	1.5102
1147	3.51676		1147	0		1147	0.954146			1147	2.26498		1147	2		1147	1.57418
1148	3.59674		1148	5		1148	0.941684			1148	2.41976		1148	11		1148	1.31555
1149	3.58705		1149	1		1149	0			1149	2.42991		1149	1		1149	0
1150	3.65836		1150	0		1150	0			1150	2.44748		1150	0		1150	0
1151	3.78995		1151	0		1151	0.596564			1151	2.46763		1151	0		1151	0.320677
1152	3.84703		1152	2		1152	2.0798			1152	2.4962		1152	1		1152	0.631771
1153	3.77267		1153	2		1153	2.25463			1153	2.52016		1153	2		1153	2.90674
1154	3.83481		1154	10		1154	2.74079			1154	2.58115		1154	3		1154	3.21393
1155	3.71353		1155	3		1155	1.20363			1155	2.60474		1155	23		1155	2.98154
1156	3.62712		1156	5		1156	2.639			1156	2.53032		1156	5		1156	2.0421
1157	3.96941		1157	0		1157	1.9671			1157	2.64597		1157	1		1157	1.58153
1158	4.01002		1158	13		1158	2.66232			1158	2.65859		1158	14		1158	1.81497
1159	4.13135		1159	1		1159	0.888635			1159	2.78868		1159	1		1159	0.460689
1160	4.64181		1160	6		1160	0.681099			1160	2.92734		1160	4		1160	0.359283
1161	4.63114		1161	0		1161	0			1161	2.96642		1161	0		1161	0
1162	5.71734		1162	0		1162	0			1162	3.01265		1162	0		1162	0
1163	5.85476		1163	0		1163	0			1163	2.98487		1163	0		1163	0
1164	5.86243		1164	0		1164	0			1164	3.07239		1164	0		1164	0.344902
1165	5.9185		1165	0		1165	0.456714			1165	3.09257		1165	1		1165	0.5142
1166	6.33695		1166	1		1166	0.621783			1166	3.11281		1166	3		1166	0.426488
1167	6.37379		1167	4		1167	0.966531			1167	3.1293		1167	2		1167	0.338626
1168	6.44629		1168	2		1168	0.858297			1168	3.13659		1168	0		1168	0.251283
1169	6.54619		1169	5		1169	0.671114			1169	3.18382		1169	2		1169	0.415577
1170	6.83336		1170	3		1170	0.741988			1170	3.23036		1170	1		1170	0.915381
1171	6.9049		1171	0		1171	0.823506			1171	3.21075		1171	2		1171	1.17447
1172	6.90198		1172	6		1172	0.829416			1172	3.17215		1172	8		1172	1.09987
1173	6.85654		1173	4		1173	0.418768			1173	3.15309		1173	4		1173	0.507396
1174	6.75767		1174	0		1174	0.507313			1174	3.13022		1174	1		1174	0.422352
1175	6.70305		1175	1		1175	0.511722			1175	3.17654		1175	1		1175	0.419808
1176	6.66468		1176	5		1176	0.431178			1176	3.1638		1176	3		1176	0.506772
1177	6.58427		1177	0		1177	0			1177	3.18761		1177	1		1177	0.511336
1178	6.48358		1178	0		1178	0			1178	3.12009		1178	2		1178	0.514271
1179	6.41079		1179	1		1179	0			1179	3.07925		1179	3		1179	0.514673
1180	6.31395		1180	0		1180	0			1180	3.13405		1180	1		1180	0.341966
1181	6.31395		1181	0		1181	0			1181	3.11278		1181	2		1181	0.257809
1182	6.28538		1182	0		1182	0			1182	3.11061		1182	1		1182	1.03486
1183	6.25596		1183	0		1183	0.279049			1183	3.08561		1183	0		1183	0.951435
1184	6.17881		1184	2		1184	2.18388			1184	3.08022		1184	11		1184	0.950096
1185	5.85925		1185	1		1185	2.03003			1185	3.08313		1185	0		1185	0
1186	5.88321		1186	20		1186	1.95917			1186	3.09865		1186	0		1186	0
1187	5.86048		1187	0		1187	0			1187	3.07239		1187	0		1187	0
1188	5.6274		1188	0		1188	0			1188	3.04319		1188	0		1188	0
1189	5.41149		1189	0		1189	0.31895			1189	2.97731		1189	0		1189	0
1190	5.26448		1190	2		1190	0.32248			1190	2.93537		1190	0		1190	0
1191	5.32946		1191	1		1191	0			1191	2.87105		1191	1		1191	0
1192	5.23631		1192	0		1192	0			1192	2.79461		1192	0		1192	0
1193	5.09354		1193	0		1193	0			1193	2.68316		1193	1		1193	0
1194	4.82046		1194	0		1194	0			1194	2.75508		1194	0		1194	0
1195	4.79919		1195	0		1195	0			1195	2.68293		1195	0		1195	0
1196	4.5878		1196	0		1196	0			1196	2.66019		1196	0		1196	0
1197	4.43754		1197	0		1197	0			1197	2.51373		1197	0		1197	0
1198	4.10936		1198	0		1198	0			1198	2.36975		1198	0		1198	0
1199	3.75587		1199	0		1199	0			1199	2.37637		1199	1		1199	0
1200	3.49065		1200	0		1200	0			1200	2.32025		1200	0		1200	0
1201	3.28541		1201	0		1201	0			1201	2.27486		1201	0		1201	0
1202	3.17197		1202	0		1202	0			1202	2.2318		1202	0		1202	0.376134
1203	2.83834		1203	1		1203	0			1203	2.04416		1203	1		1203	0.889619
1204	2.50512		1204	0		1204	0			1204	2.10459		1204	2		1204	0.749832
1205	2.33329		1205	0		1205	0			1205	2.14593		1205	4		1205	0.496403
1206	2.14448		1206	0		1206	0			1206	2.15076		1206	0		1206	0
1207	1.99064		1207	0		1207	0			1207	2.14953		1207	0		1207	0
1208	1.90955		1208	1		1208	1.31636			1208	2.09708		1208	0		1208	0
1209	1.7866		1209	0		1209	1.87664			1209	2.05624		1209	0		1209	0
1210	1.47462		1210	3		1210	0			1210	1.99703		1210	1		1210	0
1211	1.27253		1211	2		1211	0			1211	1.86439		1211	1		1211	0
1212	1.18807		1212	0		1212	0			1212	1.73019		1212	0		1212	0
1213	1.12504		1213	0		1213	0			1213	1.68905		1213	0		1213	0
1214	1.10282		1214	0		1214	0			1214	1.62672		1214	0		1214	0
1215	1.09058		1215	1		1215	0			1215	1.5875		1215	0		1215	0.519416
1216	1.06891		1216	1		1216	0			1216	1.54828		1216	1		1216	1.78652
1217	1.08432		1217	0		1217	0			1217	1.48468		1217	2		1217	1.67094
1218	1.05307		1218	7		1218	0			1218	1.44491		1218	7		1218	1.35213
1219	1.08085		1219	1		1219	0			1219	1.37927		1219	0		1219	0
1220	1.06964		1220	0		1220	0			1220	1.31733		1220	0		1220	0
1221	1.05762		1221	3		1221	0			1221	1.38886		1221	0		1221	0
1222	1.11386		1222	0		1222	0			1222	1.38764		1222	0		1222	0
1223	1.09476		1223	0		1223	0			1223	1.42656		1223	0		1223	0
1224	1.15988		1224	0		1224	0			1224	1.42053		1224	1		1224	0
1225	1.1912		1225	3		1225	0			1225	1.3778		1225	0		1225	0
1226	1.32421		1226	0		1226	0			1226	1.31518		1226	0		1226	0
1227	1.38303		1227	0		1227	0			1227	1.29296		1227	0		1227	0
1228	1.35077		1228	1		1228	0			1228	1.28954		1228	1		1228	0
1229	1.37077		1229	0		1229	0			1229	1.28954		1229	0		1229	0
1230	1.39187		1230	1		1230	0			1230	1.31779		1230	0		1230	0
1231	1.42012		1231	0		1231	0			1231	1.23363		1231	0		1231	0
1232	1.42739		1232	0		1232	0			1232	1.31809		1232	0		1232	0
1233	1.55117		1233	0		1233	0			1233	1.35897		1233	0		1233	0
1234	1.65391		1234	1		1234	0			1234	1.40131		1234	0		1234	0
1235	1.69791		1235	0		1235	0			1235	1.30728		1235	0		1235	0
1236	1.76662		1236	0		1236	0			1236	1.23981		1236	0		1236	0
1237	1.78623		1237	0		1237	0			1237	1.24242		1237	0		1237	0
1238	1.81123		1238	0		1238	0			1238	1.24143		1238	0		1238	0
1239	1.9038		1239	0		1239	0			1239	1.22121		1239	0		1239	0
1240	2.01326		1240	0		1240	0			1240	1.22611		1240	0		1240	0
1241	2.30767		1241	0		1241	0			1241	1.17988		1241	0		1241	0.674483
1242	2.37915		1242	1		1242	0			1242	1.16844		1242	1		1242	0.676808
1243	2.5453		1243	0		1243	0			1243	1.20988		1243	2		1243	0
1244	2.56752		1244	0		1244	0			1244	1.16766		1244	0		1244	0
1245	2.61606		1245	1		1245	0			1245	1.17043		1245	0		1245	0
1246	2.61606		1246	0		1246	5.25459			1246	1.25969		1246	1		1246	3.71661
1247	2.69017		1247	0		1247	6.21471			1247	1.30444		1247	0		1247	5.07428
1248	3.11361		1248	26		1248	5.87951			1248	1.31028		1248	17		1248	5.44786
1249	3.23192		1249	7		1249	1.85896			1249	1.32663		1249	8		1249	2.18039
1250	3.49473		1250	1		1250	0.703383			1250	1.32786		1250	2		1250	0.576614
1251	4.25788		1251	4		1251	1.0481			1251	1.3814		1251	1		1251	0
1252	4.34355		1252	0		1252	0.504265			1252	1.45287		1252	0		1252	0
1253	4.38696		1253	4		1253	0.485436			1253	1.43587		1253	1		1253	0.736848
1254	4.76751		1254	0		1254	0			1254	1.43108		1254	1		1254	0.737261
1255	4.86712		1255	0		1255	1.01511			1255	1.47577		1255	2		1255	1.08877
1256	4.94255		1256	1		1256	0.916048			1256	1.43343		1256	1		1256	0.715768
1257	5.27723		1257	8		1257	0.920918			1257	1.49935		1257	3		1257	1.54458
1258	6.49857		1258	0		1258	0			1258	1.53783		1258	0		1258	1.16494
1259	6.70192		1259	2		1259	1.08971			1259	1.62416		1259	6		1259	3.52796
1260	6.6871		1260	0		1260	0.993866			1260	1.645		1260	1		1260	2.93648
1261	6.91132		1261	11		1261	1.39008			1261	1.71943		1261	15		1261	6.53485
1262	6.94735		1262	1		1262	0.48475			1262	1.81171		1262	3		1262	4.49395
1263	6.95156		1263	5		1263	1.03398			1263	1.85524		1263	26		1263	4.98441
1264	7.16322		1264	0		1264	0.620693			1264	2.02947		1264	3		1264	1.40235
1265	7.27964		1265	8		1265	0.750574			1265	2.05366		1265	8		1265	0.980718
1266	7.48935		1266	0		1266	0.216406			1266	2.19189		1266	0		1266	0
1267	7.90227		1267	2		1267	0.55979			1267	2.28012		1267	0		1267	0.456123
1268	8.19805		1268	1		1268	0.83132			1268	2.39199		1268	2		1268	1.12303
1269	8.21802		1269	5		1269	0.764447			1269	2.34338		1269	2		1269	0.896025
1270	8.14697		1270	6		1270	0.699844			1270	2.38802		1270	6		1270	0.995686
1271	8.12081		1271	0		1271	0.424109			1271	2.41108		1271	0		1271	0.872358
1272	8.04686		1272	4		1272	1.14269			1272	2.43192		1272	3		1272	2.70316
1273	7.90604		1273	2		1273	3.74387			1273	2.49326		1273	5		1273	6.85753
1274	7.87353		1274	10		1274	4.0523			1274	2.47339		1274	17		1274	7.49424
1275	7.8552		1275	40		1275	3.34799			1275	2.49942		1275	42		1275	5.63854
1276	7.78685		1276	6		1276	0.440908			1276	2.49942		1276	11		1276	1.16859
1277	7.73783		1277	0		1277	0			1277	2.52065		1277	0		1277	0
1278	7.63179		1278	0		1278	0			1278	2.51016		1278	0		1278	0
1279	7.64604		1279	0		1279	0			1279	2.66182		1279	0		1279	0
1280	7.52461		1280	0		1280	0.379686			1280	2.69937		1280	0		1280	0
1281	7.48836		1281	0		1281	0.841398			1281	2.8074		1281	0		1281	0
1282	7.39564		1282	5		1282	0.929501			1282	2.77914		1282	1		1282	0
1283	7.36243		1283	6		1283	1.17747			1283	2.76076		1283	0		1283	0
1284	7.21044		1284	1		1284	1.04045			1284	2.7799		1284	0		1284	0
1285	7.10469		1285	8		1285	1.22635			1285	2.81807		1285	2		1285	0
1286	6.94627		1286	4		1286	0.578781			1286	2.85744		1286	0		1286	0
1287	6.76261		1287	3		1287	0.251065			1287	2.89927		1287	0		1287	0
1288	6.87147		1288	0		1288	0			1288	2.84344		1288	0		1288	0
1289	6.69903		1289	0		1289	0.349311			1289	2.84301		1289	0		1289	0
1290	6.53711		1290	0		1290	0.540635			1290	2.90495		1290	0		1290	0
1291	6.24962		1291	4		1291	1.39328			1291	2.9593		1291	0		1291	0.264806
1292	6.09824		1292	2		1292	1.03972			1292	3.02082		1292	0		1292	0.262673
1293	5.97205		1293	9		1293	0.87934			1293	3.0829		1293	3		1293	0.259996
1294	5.93283		1294	0		1294	0			1294	3.0329		1294	0		1294	0
1295	5.51139		1295	0		1295	0			1295	3.11491		1295	0		1295	0
1296	5.41644		1296	0		1296	0			1296	3.18915		1296	0		1296	0
1297	5.34463		1297	1		1297	0			1297	3.24729		1297	1		1297	0
1298	5.20694		1298	0		1298	0			1298	3.25125		1298	0		1298	0
1299	5.0592		1299	0		1299	0			1299	3.24999		1299	0		1299	0
1300	4.88888		1300	0		1300	0			1300	3.33782		1300	0		1300	0
1301	4.53395		1301	0		1301	0			1301	3.37596		1301	0		1301	0
1302	4.30286		1302	0		1302	0			1302	3.41555		1302	0		1302	0.313566
1303	4.12761		1303	0		1303	0			1303	3.40041		1303	0		1303	0.314139
1304	4.01552		1304	1		1304	0.899957			1304	3.38898		1304	4		1304	0.312429
1305	3.84127		1305	1		1305	0.979558			1305	3.39694		1305	0		1305	0
1306	3.48805		1306	4		1306	1.26388			1306	3.45615		1306	0		1306	0.231782
1307	3.09362		1307	1		1307	0.598566			1307	3.4524		1307	1		1307	0.232162
1308	2.84292		1308	2		1308	0			1308	3.44575		1308	2		1308	0
1309	2.59208		1309	0		1309	0			1309	3.43923		1309	0		1309	0
1310	2.40289		1310	0		1310	0			1310	3.44553		1310	0		1310	0
1311	2.26055		1311	0		1311	0			1311	3.466		1311	0		1311	0
1312	2.29759		1312	0		1312	0			1312	3.52631		1312	1		1312	0
1313	2.38413		1313	0		1313	0			1313	3.66234		1313	0		1313	0
1314	2.38607		1314	0		1314	0			1314	3.65697		1314	0		1314	0
1315	2.33449		1315	0		1315	0			1315	3.74987		1315	0		1315	0
1316	2.39897		1316	0		1316	0			1316	3.79354		1316	0		1316	0
1317	2.34956		1317	0		1317	5.05982			1317	3.76611		1317	0		1317	0.492971
1318	2.32093		1318	2		1318	5.23868			1318	3.77052		1318	0		1318	0.488547
1319	2.39192		1319	19		1319	4.64481			1319	3.82279		1319	7		1319	0.477738
1320	2.43326		1320	1		1320	0			1320	3.86897		1320	0		1320	0
1321	2.50191		1321	0		1321	0			1321	4.02987		1321	0		1321	0
1322	2.61097		1322	0		1322	0.613688			1322	4.16842		1322	0		1322	0
1323	2.81329		1323	0		1323	2.16028			1323	4.28394		1323	0		1323	0.423746
1324	2.89419		1324	3		1324	2.87751			1324	4.43937		1324	1		1324	0.473538
1325	2.95719		1325	8		1325	2.43745			1325	4.49185		1325	6		1325	0.408631
1326	3.01903		1326	4		1326	0.929405			1326	4.58375		1326	1		1326	0
1327	3.09943		1327	1		1327	0			1327	4.62838		1327	0		1327	0
1328	3.03604		1328	0		1328	0			1328	4.71708		1328	0		1328	0
1329	3.10483		1329	0		1329	0			1329	4.76669		1329	0		1329	0
1330	3.09853		1330	1		1330	0			1330	4.81885		1330	0		1330	0
1331	3.14823		1331	0		1331	0			1331	4.8446		1331	0		1331	0
1332	3.18746		1332	0		1332	0			1332	4.80064		1332	1		1332	0
1333	3.16523		1333	2		1333	0.528318			1333	4.75868		1333	0		1333	0
1334	3.19536		1334	0		1334	0			1334	4.71452		1334	0		1334	0
1335	3.30203		1335	1		1335	0.514989			1335	4.6555		1335	0		1335	0
1336	3.26037		1336	0		1336	0.506299			1336	4.61935		1336	0		1336	0
1337	3.35031		1337	2		1337	0.490971			1337	4.62151		1337	0		1337	0
1338	3.47217		1338	1		1338	0			1338	4.54066		1338	0		1338	0.231758
1339	3.57516		1339	0		1339	0.471711			1339	4.63127		1339	1		1339	0.285814
1340	3.5866		1340	0		1340	0.466276			1340	4.63525		1340	3		1340	0.286373
1341	3.66042		1341	3		1341	0.613821			1341	4.72827		1341	1		1341	0
1342	3.7013		1342	0		1342	2.5937			1342	4.60394		1342	1		1342	0.631161
1343	3.72715		1343	1		1343	2.64723			1343	4.67426		1343	0		1343	0.573742
1344	3.72472		1344	16		1344	2.54189			1344	4.66403		1344	10		1344	0.582735
1345	4.11859		1345	1		1345	0			1345	4.60493		1345	0		1345	0
1346	4.20664		1346	1		1346	0			1346	4.45909		1346	0		1346	0
1347	4.33432		1347	0		1347	0			1347	4.44903		1347	0		1347	0
1348	4.42492		1348	0		1348	0			1348	4.39028		1348	0		1348	0
1349	4.46903		1349	1		1349	0			1349	4.3595		1349	0		1349	0
1350	4.50483		1350	1		1350	0			1350	4.36005		1350	2		1350	0.312284
1351	4.63332		1351	0		1351	0.482094			1351	4.26493		1351	0		1351	0.445282
1352	4.69693		1352	0		1352	0.473648			1352	4.18356		1352	3		1352	0.450657
1353	4.78854		1353	4		1353	0.466636			1353	4.12752		1353	4		1353	0.2607
1354	4.88509		1354	0		1354	0.918211			1354	4.11493		1354	0		1354	0
1355	4.91286		1355	0		1355	2.84006			1355	4.03191		1355	0		1355	0.536999
1356	5.02779		1356	8		1356	4.16338			1356	4.00072		1356	2		1356	0.824763
1357	5.03833		1357	17		1357	3.81919			1357	3.88517		1357	6		1357	0.849675
1358	5.05641		1358	12		1358	2.2398			1358	3.75354		1358	4		1358	0.513825
1359	5.05401		1359	5		1359	0.893848			1359	3.65947		1359	2		1359	0.227796
1360	5.08423		1360	3		1360	1.45273			1360	3.48539		1360	1		1360	0.705707
1361	5.09161		1361	0		1361	1.07117			1361	3.39065		1361	0		1361	0.640516
1362	5.05163		1362	10		1362	1.02606			1362	3.32624		1362	8		1362	0.739829
1363	5.74258		1363	0		1363	0.293118			1363	3.27482		1363	0		1363	0
1364	5.79011		1364	0		1364	0.388678			1364	3.13069		1364	1		1364	0
1365	5.88332		1365	3		1365	0.387111			1365	2.91291		1365	1		1365	0
1366	5.83871		1366	1		1366	0			1366	2.86574		1366	0		1366	0
1367	5.86103		1367	0		1367	0.380525			1367	2.79955		1367	0		1367	0
1368	5.97292		1368	0		1368	0.374468			1368	2.74736		1368	0		1368	0
1369	6.0534		1369	4		1369	0.370807			1369	2.65446		1369	2		1369	0.313367
1370	6.15037		1370	0		1370	0			1370	2.56336		1370	0		1370	0
1371	6.15235		1371	0		1371	2.38211			1371	2.44075		1371	1		1371	2.96086
1372	6.19832		1372	1		1372	2.79554			1372	2.43308		1372	0		1372	3.21877
1373	6.2223		1373	25		1373	2.68521			1373	2.42117		1373	26		1373	3.27908
1374	6.44909		1374	5		1374	0.532354			1374	2.3533		1374	3		1374	0.347232
1375	6.33994		1375	0		1375	0.865194			1375	2.30051		1375	0		1375	1.53764
1376	6.38969		1376	1		1376	0.834494			1376	2.25783		1376	0		1376	1.82222
1377	6.93817		1377	9		1377	0.68413			1377	2.20513		1377	13		1377	1.9008
1378	7.06349		1378	0		1378	0			1378	2.12225		1378	2		1378	0
1379	8.38415		1379	0		1379	0			1379	1.98562		1379	0		1379	0
1380	8.42633		1380	0		1380	0.405484			1380	1.99181		1380	0		1380	0
1381	8.37653		1381	0		1381	0.405038			1381	1.91538		1381	0		1381	0
1382	8.37662		1382	6		1382	0.470512			1382	1.91118		1382	2		1382	0.424594
1383	8.45408		1383	0		1383	0.33361			1383	1.88595		1383	0		1383	0.712002
1384	8.48536		1384	1		1384	0.331649			1384	1.85519		1384	1		1384	0.995342
1385	8.56411		1385	4		1385	0.59377			1385	1.87669		1385	4		1385	2.50237
1386	8.60483		1386	0		1386	0.461687			1386	1.89419		1386	2		1386	2.01604
1387	8.62357		1387	5		1387	1.58673			1387	1.98352		1387	12		1387	5.32924
1388	8.57161		1388	2		1388	1.46267			1388	2.07441		1388	1		1388	4.45181
1389	8.5429		1389	17		1389	1.34028			1389	2.09664		1389	28		1389	4.26579
1390	8.47987		1390	3		1390	0.540719			1390	2.11837		1390	6		1390	1.0004
1391	8.36962		1391	0		1391	0.340988			1391	2.16115		1391	0		1391	0
1392	8.32654		1392	5		1392	0.411969			1392	2.11774		1392	2		1392	0
1393	8.25551		1393	0		1393	0			1393	2.14552		1393	0		1393	0
1394	8.20105		1394	1		1394	0			1394	2.15218		1394	0		1394	0
1395	8.28985		1395	1		1395	0			1395	2.28954		1395	0		1395	0
1396	8.27284		1396	0		1396	0.275012			1396	2.29216		1396	0		1396	0
1397	8.2398		1397	0		1397	0.34484			1397	2.32697		1397	1		1397	0.995984
1398	8.23746		1398	4		1398	0.345841			1398	2.42559		1398	1		1398	0.862139
1399	8.19573		1399	1		1399	0.624131			1399	2.4763		1399	7		1399	1.04897
1400	8.16838		1400	0		1400	0.622798			1400	2.52133		1400	0		1400	0.401658
1401	8.17371		1401	8		1401	0.760165			1401	2.62869		1401	3		1401	0.380047
1402	8.24827		1402	1		1402	0.208308			1402	2.81676		1402	1		1402	0
1403	8.20176		1403	2		1403	0.209902			1403	2.97435		1403	0		1403	0
1404	8.05665		1404	0		1404	0			1404	3.14841		1404	0		1404	0
1405	8.0622		1405	1		1405	0.351029			1405	3.16722		1405	0		1405	0
1406	8.12106		1406	1		1406	0.332276			1406	3.18762		1406	0		1406	0
1407	8.05471		1407	3		1407	0.886858			1407	3.23072		1407	0		1407	0
1408	9.43013		1408	1		1408	0.852161			1408	3.29402		1408	0		1408	0
1409	9.37747		1409	10		1409	0.804261			1409	3.17882		1409	1		1409	0
1410	9.14844		1410	3		1410	0.252978			1410	3.19521		1410	1		1410	0
1411	8.97935		1411	0		1411	0			1411	3.15125		1411	0		1411	0
1412	8.77809		1412	1		1412	0.391653			1412	3.17412		1412	0		1412	0.592295
1413	8.72803		1413	0		1413	0.33106			1413	3.17412		1413	0		1413	0.599387
1414	8.56253		1414	5		1414	0.675556			1414	3.10629		1414	7		1414	1.71811
1415	8.4094		1415	0		1415	0.973105			1415	3.06225		1415	0		1415	1.1065
1416	8.2169		1416	5		1416	1.15174			1416	3.1438		1416	13		1416	1.16675
1417	7.85518		1417	9		1417	1.81478			1417	3.1927		1417	0		1417	1.38035
1418	7.56728		1418	2		1418	1.66265			1418	3.26259		1418	1		1418	1.57436
1419	7.08131		1419	13		1419	1.57062			1419	3.39705		1419	16		1419	1.61015
1420	6.84397		1420	6		1420	2.58144			1420	3.503		1420	3		1420	1.20786
1421	6.65979		1421	0		1421	2.14533			1421	3.53352		1421	2		1421	0.979377
1422	6.2718		1422	24		1422	2.21721			1422	3.56052		1422	11		1422	0.901239
1423	6.10486		1423	0		1423	0			1423	3.5247		1423	0		1423	0
1424	6.04268		1424	0		1424	0			1424	3.56653		1424	1		1424	0
1425	5.97479		1425	0		1425	0.491857			1425	3.56653		1425	1		1425	0
1426	5.70269		1426	0		1426	0.503376			1426	3.58187		1426	0		1426	0
1427	5.6207		1427	5		1427	0.496457			1427	3.46311		1427	1		1427	0.379174
1428	5.57895		1428	0		1428	3.31903			1428	3.5323		1428	0		1428	0.827522
1429	5.93826		1429	0		1429	4.88016			1429	3.55358		1429	4		1429	1.19501
1430	5.91437		1430	34		1430	6.68089			1430	3.54803		1430	7		1430	1.2693
1431	5.93039		1431	17		1431	4.00103			1431	3.60933		1431	5		1431	0.88941
1432	5.9845		1432	19		1432	3.06564			1432	3.55691		1432	5		1432	0.668796
1433	5.94781		1433	6		1433	1.25747			1433	3.62716		1433	2		1433	0.29701
1434	5.82994		1434	7		1434	0.785684			1434	3.58127		1434	2		1434	0
1435	5.81424		1435	0		1435	0			1435	3.56534		1435	0		1435	0
1436	5.68233		1436	1		1436	0			1436	3.52682		1436	0		1436	0
1437	5.53991		1437	0		1437	0.488963			1437	3.44815		1437	0		1437	0.394094
1438	5.90603		1438	0		1438	2.09524			1438	3.36081		1438	1		1438	0.789317
1439	5.95461		1439	5		1439	4.14159			1439	3.34066		1439	4		1439	1.18847
1440	6.00661		1440	17		1440	3.91799			1440	3.43362		1440	5		1440	0.959211
1441	5.70612		1441	21		1441	2.31712			1441	3.32246		1441	6		1441	0.578987
1442	5.65991		1442	2		1442	0			1442	3.25191		1442	1		1442	0
1443	5.52474		1443	0		1443	0			1443	3.09747		1443	0		1443	0
1444	5.92994		1444	0		1444	0.390363			1444	3.02916		1444	0		1444	0
1445	5.84703		1445	1		1445	0.394329			1445	3.0799		1445	2		1445	0
1446	5.65958		1446	3		1446	1.4888			1446	2.9688		1446	0		1446	0.808788
1447	5.75456		1447	0		1447	1.58957			1447	3.01642		1447	0		1447	0.996442
1448	5.73028		1448	12		1448	1.59551			1448	2.91677		1448	9		1448	1.10741
1449	5.64323		1449	4		1449	0.495179			1449	2.89802		1449	2		1449	0.379513
1450	5.69081		1450	0		1450	0.460234			1450	2.85389		1450	1		1450	0
1451	5.84808		1451	1		1451	1.28216			1451	2.67974		1451	1		1451	1.11835
1452	6.94785		1452	4		1452	4.31001			1452	2.57357		1452	0		1452	4.00578
1453	7.11159		1453	10		1453	4.30569			1453	2.61525		1453	10		1453	4.93933
1454	7.26045		1454	40		1454	4.57512			1454	2.59975		1454	29		1454	5.23299
1455	7.36446		1455	5		1455	2.00621			1455	2.55915		1455	9		1455	2.54794
1456	7.31926		1456	14		1456	1.61674			1456	2.48473		1456	12		1456	1.61627
1457	7.36925		1457	7		1457	0.535716			1457	2.49143		1457	3		1457	0.325876
1458	7.41441		1458	0		1458	0			1458	2.44818		1458	0		1458	0.330599
1459	7.4511		1459	0		1459	0			1459	2.42498		1459	0		1459	0.332204
1460	7.49946		1460	2		1460	0.282445			1460	2.38622		1460	3		1460	0.445061
1461	8.26417		1461	0		1461	0.476304			1461	2.41311		1461	0		1461	0.671242
1462	8.33516		1462	2		1462	0.45323			1462	2.39053		1462	1		1462	0.677494
1463	8.40893		1463	5		1463	0.308787			1463	2.34711		1463	5		1463	0.574936
1464	9.53733		1464	0		1464	0			1464	2.34711		1464	0		1464	0
1465	9.6075		1465	0		1465	0			1465	2.2629		1465	0		1465	0
1466	9.56463		1466	2		1466	0.531592			1466	2.31355		1466	0		1466	0.360443
1467	9.62563		1467	0		1467	0.588873			1467	2.17772		1467	0		1467	0.616862
1468	9.61909		1468	7		1468	0.820631			1468	2.16704		1468	3		1468	0.880227
1469	9.65192		1469	3		1469	0.405437			1469	2.13951		1469	2		1469	0.513262
1470	9.75914		1470	4		1470	0.229782			1470	2.05529		1470	2		1470	0
1471	9.96839		1471	0		1471	0			1471	2.03967		1471	0		1471	0
1472	9.89445		1472	0		1472	0.172874			1472	2.01403		1472	0		1472	0
1473	9.84124		1473	0		1473	0.172717			1473	1.96464		1473	0		1473	0
1474	9.79404		1474	3		1474	1.03401			1474	1.8489		1474	1		1474	1.32165
1475	9.92136		1475	0		1475	1.47082			1475	1.80152		1475	0		1475	2.20782
1476	9.90683		1476	15		1476	1.44469			1476	1.79718		1476	8		1476	2.35131
1477	10.2521		1477	11		1477	0.713958			1477	1.83639		1477	7		1477	1.80362
1478	10.4656		1478	0		1478	0.165023			1478	1.81008		1478	1		1478	1.08479
1479	10.2665		1479	2		1479	0.166982			1479	1.67605		1479	4		1479	1.29107
1480	10.2026		1480	1		1480	0			1480	1.67605		1480	2		1480	0.654933
1481	10.1027		1481	0		1481	0			1481	1.60492		1481	2		1481	0
1482	10.0331		1482	0		1482	0.171315			1482	1.60492		1482	0		1482	0
1483	9.90151		1483	1		1483	0.231303			1483	1.57495		1483	0		1483	1.06348
1484	9.86397		1484	2		1484	0.292776			1484	1.48923		1484	0		1484	1.47203
1485	9.6617		1485	1		1485	0.179299			1485	1.44921		1485	6		1485	1.49444
1486	9.53483		1486	2		1486	0.184748			1486	1.40919		1486	2		1486	0.943354
1487	9.27519		1487	0		1487	0			1487	1.42404		1487	0		1487	1.57652
1488	8.82195		1488	1		1488	0			1488	1.40685		1488	3		1488	1.67676
1489	8.63398		1489	0		1489	0			1489	1.22858		1489	5		1489	1.3604
1490	8.39206		1490	0		1490	0			1490	1.18136		1490	0		1490	0
1491	8.14421		1491	0		1491	0			1491	1.11834		1491	1		1491	0
1492	8.00014		1492	0		1492	0			1492	1.11834		1492	0		1492	0
1493	7.90736		1493	0		1493	0			1493	1.11457		1493	0		1493	0
1494	7.66362		1494	0		1494	0			1494	1.08892		1494	0		1494	0
1495	7.23161		1495	1		1495	0			1495	1.03459		1495	2		1495	0
1496	6.81025		1496	0		1496	0			1496	1.03625		1496	0		1496	0
1497	6.36602		1497	0		1497	0			1497	1.06152		1497	0		1497	0
1498	6.08037		1498	0		1498	0.305152			1498	1.05888		1498	1		1498	0.742248
1499	5.60964		1499	1		1499	0.886499			1499	1.0981		1499	0		1499	1.2379
1500	5.03915		1500	2		1500	0.831009			1500	1.07636		1500	2		1500	1.25394
1501	4.70731		1501	5		1501	0.623964			1501	1.05675		1501	3		1501	0.76806
1502	4.58735		1502	0		1502	0			1502	1.05675		1502	0		1502	0
1503	4.34111		1503	0		1503	0			1503	1.01118		1503	0		1503	0
1504	4.2465		1504	0		1504	0			1504	1.01118		1504	0		1504	0
1505	3.92584		1505	0		1505	0			1505	0.939553		1505	0		1505	0.820127
1506	3.81827		1506	0		1506	1.94542			1506	0.993376		1506	0		1506	2.67502
1507	3.76533		1507	1		1507	2.42967			1507	0.993376		1507	3		1507	3.48822
1508	3.78739		1508	12		1508	2.83953			1508	1.00381		1508	7		1508	3.1639
1509	3.65304		1509	3		1509	1.02762			1509	0.984204		1509	3		1509	1.28126
1510	3.34644		1510	3		1510	0.572478			1510	1.04615		1510	2		1510	0
1511	2.93602		1511	0		1511	0			1511	1.09151		1511	0		1511	0
1512	2.63481		1512	0		1512	0			1512	1.09151		1512	0		1512	0
1513	2.43475		1513	0		1513	0			1513	1.19748		1513	0		1513	0
1514	2.19759		1514	0		1514	0			1514	1.21017		1514	0		1514	0
1515	2.09		1515	0		1515	0			1515	1.20592		1515	0		1515	0
1516	1.78801		1516	0		1516	0			1516	1.31764		1516	0		1516	0
1517	1.71419		1517	0		1517	0			1517	1.44899		1517	0		1517	0
1518	1.54902		1518	0		1518	0			1518	1.54113		1518	0		1518	0
1519	1.5808		1519	0		1519	0			1519	1.6539		1519	1		1519	0
1520	1.83095		1520	0		1520	0			1520	1.72716		1520	0		1520	0
1521	1.66304		1521	0		1521	1.0711			1521	1.9485		1521	0		1521	0
1522	1.56239		1522	2		1522	1.10646			1522	2.05311		1522	0		1522	0
1523	1.54065		1523	1		1523	0			1523	2.09233		1523	0		1523	0
1524	1.51074		1524	0		1524	0			1524	2.15621		1524	0		1524	0
1525	1.40491		1525	0		1525	0			1525	2.27198		1525	0		1525	0
1526	1.49908		1526	0		1526	0			1526	2.31779		1526	0		1526	0
1527	1.61316		1527	0		1527	0			1527	2.39925		1527	0		1527	0
1528	1.9569		1528	0		1528	0			1528	2.58387		1528	0		1528	0
1529	3.79972		1529	0		1529	0			1529	2.72877		1529	0		1529	0
1530	3.86948		1530	0		1530	0			1530	2.79124		1530	1		1530	0
1531	3.94031		1531	0		1531	0			1531	2.82943		1531	0		1531	0.46405
1532	4.0805		1532	0		1532	0.413225			1532	2.89507		1532	1		1532	2.30239
1533	4.14889		1533	1		1533	0.410988			1533	2.89507		1533	4		1533	2.20491
1534	4.1245		1534	2		1534	0			1534	2.89629		1534	20		1534	1.92486
1535	4.14775		1535	0		1535	0			1535	2.91629		1535	0		1535	0
1536	4.15299		1536	0		1536	0			1536	2.91512		1536	1		1536	0
1537	4.17829		1537	0		1537	0			1537	2.84192		1537	1		1537	0
1538	4.23702		1538	0		1538	0			1538	2.82292		1538	0		1538	0
1539	4.54446		1539	0		1539	0			1539	2.85263		1539	1		1539	0
1540	4.56994		1540	2		1540	0			1540	2.83302		1540	0		1540	0
1541	4.69687		1541	0		1541	0			1541	2.83235		1541	0		1541	0
1542	4.748		1542	0		1542	0			1542	2.87682		1542	2		1542	0
1543	4.84246		1543	0		1543	0			1543	2.85459		1543	0		1543	0
1544	4.84463		1544	0		1544	0			1544	2.90869		1544	0		1544	0
1545	4.87093		1545	0		1545	0			1545	2.95713		1545	0		1545	0
1546	4.88388		1546	0		1546	0			1546	2.98997		1546	0		1546	0
1547	4.90562		1547	0		1547	0			1547	2.98997		1547	0		1547	0
1548	4.90562		1548	0		1548	0			1548	3.03212		1548	0		1548	0
1549	4.90562		1549	0		1549	0			1549	3.05172		1549	0		1549	0
1550	4.90562		1550	0		1550	0			1550	3.01251		1550	0		1550	0
1551	4.95026		1551	0		1551	0			1551	3.03212		1551	0		1551	0
1552	4.98056		1552	0		1552	0			1552	3.05893		1552	0		1552	0
1553	5.00382		1553	0		1553	0			1553	3.12254		1553	0		1553	0
1554	5.02604		1554	0		1554	0			1554	3.05995		1554	0		1554	0
1555	5.02604		1555	0		1555	0			1555	3.13259		1555	0		1555	0
1556	5.07544		1556	0		1556	0			1556	3.141		1556	0		1556	0
1557	5.07616		1557	0		1557	0			1557	3.22469		1557	0		1557	0
1558	5.14725		1558	0		1558	0			1558	3.16344		1558	0		1558	0
1559	4.98871		1559	0		1559	0			1559	3.07404		1559	0		1559	0
1560	4.98999		1560	0		1560	0			1560	3.04631		1560	0		1560	0
1561	4.8831		1561	0		1561	0			1561	3.00171		1561	0		1561	0
1562	4.86037		1562	0		1562	0			1562	2.97997		1562	1		1562	0
1563	4.83815		1563	0		1563	0			1563	2.96083		1563	0		1563	0
1564	4.88821		1564	0		1564	0			1564	2.97021		1564	0		1564	0
1565	4.69251		1565	1		1565	0			1565	2.93698		1565	0		1565	0
1566	4.3824		1566	1		1566	0			1566	2.77747		1566	2		1566	0.381618
1567	4.30425		1567	0		1567	0.555189			1567	2.80192		1567	0		1567	0.768831
1568	4.07442		1568	0		1568	0.872976			1568	2.80576		1568	2		1568	0.983005
1569	3.88128		1569	4		1569	1.07513			1569	2.71646		1569	6		1569	0.811047
1570	3.73978		1570	2		1570	2.28046			1570	2.6159		1570	2		1570	0.940607
1571	3.4581		1571	1		1571	2.08422			1571	2.55849		1571	0		1571	0.860251
1572	3.24872		1572	11		1572	2.05352			1572	2.48006		1572	7		1572	1.1351
1573	3.0905		1573	0		1573	0			1573	2.40096		1573	1		1573	0.362359
1574	2.7759		1574	0		1574	0			1574	2.16664		1574	2		1574	0
1575	2.63931		1575	0		1575	0			1575	2.0555		1575	0		1575	0
1576	2.4937		1576	0		1576	3.77346			1576	2.03828		1576	0		1576	1.83433
1577	2.59441		1577	0		1577	4.66855			1577	2.03638		1577	1		1577	3.01714
1578	2.57806		1578	17		1578	5.80599			1578	2.03099		1578	13		1578	3.13161
1579	2.48185		1579	4		1579	3.12352			1579	2.03099		1579	9		1579	1.69124
1580	2.26721		1580	4		1580	2.21895			1580	2.06891		1580	2		1580	0.650668
1581	2.33314		1581	5		1581	2.43438			1581	2.0493		1581	2		1581	0.77986
1582	2.30149		1582	0		1582	3.62895			1582	2.02918		1582	1		1582	1.81183
1583	2.35543		1583	5		1583	5.85455			1583	2.07632		1583	3		1583	2.67951
1584	2.3767		1584	10		1584	7.08782			1584	2.07595		1584	10		1584	3.43622
1585	2.5342		1585	10		1585	4.64201			1585	2.11739		1585	8		1585	2.14283
1586	2.53159		1586	11		1586	4.60882			1586	2.09249		1586	9		1586	1.38707
1587	2.63228		1587	0		1587	2.61403			1587	2.13671		1587	0		1587	0.503927
1588	2.58965		1588	10		1588	7.00092			1588	2.11497		1588	2		1588	3.67513
1589	2.58965		1589	2		1589	7.83901			1589	2.0983		1589	2		1589	4.2701
1590	2.59862		1590	20		1590	9.07912			1590	2.09928		1590	25		1590	5.30636
1591	2.6264		1591	14		1591	7.09345			1591	2.17214		1591	7		1591	3.16126
1592	2.6468		1592	8		1592	5.65949			1592	2.21121		1592	11		1592	3.529
1593	2.64316		1593	11		1593	4.09094			1593	2.19614		1593	8		1593	2.19398
1594	2.82816		1594	8		1594	1.78655			1594	2.16659		1594	10		1594	1.20638
1595	2.84777		1595	1		1595	0			1595	2.20053		1595	0		1595	0
1596	2.89634		1596	0		1596	0			1596	2.26414		1596	0		1596	0.477268
1597	2.88617		1597	0		1597	1.36782			1597	2.23634		1597	0		1597	1.20028
1598	2.90998		1598	2		1598	6.20338			1598	2.2042		1598	4		1598	2.99615
1599	2.91226		1599	5		1599	6.06115			1599	2.22444		1599	6		1599	2.61585
1600	2.95567		1600	25		1600	4.97453			1600	2.24644		1600	15		1600	1.88681
1601	3.11595		1601	2		1601	0			1601	2.25716		1601	1		1601	0
1602	3.16432		1602	0		1602	0			1602	2.28019		1602	0		1602	0
1603	3.13565		1603	0		1603	4.15984			1603	2.29834		1603	1		1603	2.7647
1604	3.75001		1604	2		1604	4.09851			1604	2.32101		1604	1		1604	2.86881
1605	3.75001		1605	24		1605	3.78626			1605	2.32518		1605	22		1605	2.74425
1606	3.71001		1606	1		1606	0			1606	2.32518		1606	2		1606	0
1607	3.77563		1607	0		1607	0			1607	2.34592		1607	0		1607	0
1608	3.92058		1608	0		1608	0			1608	2.27849		1608	0		1608	0
1609	3.91201		1609	0		1609	0			1609	2.21393		1609	0		1609	0
1610	4.10587		1610	0		1610	0			1610	2.30611		1610	0		1610	0
1611	4.16779		1611	0		1611	0			1611	2.3769		1611	0		1611	0
1612	4.81374		1612	0		1612	0			1612	2.47773		1612	0		1612	0
1613	5.02681		1613	1		1613	0.335734			1613	2.49651		1613	1		1613	0.313646
1614	5.08622		1614	0		1614	0.332804			1614	2.54502		1614	1		1614	0
1615	5.09227		1615	2		1615	0.979545			1615	2.61022		1615	1		1615	1.11296
1616	5.16067		1616	1		1616	1.68151			1616	2.61832		1616	0		1616	1.97581
1617	5.38167		1617	6		1617	1.53116			1617	2.67811		1617	10		1617	1.93205
1618	5.6492		1618	9		1618	1.06333			1618	2.80131		1618	10		1618	1.13589
1619	6.75066		1619	1		1619	0.248576			1619	2.80174		1619	0		1619	0
1620	6.80381		1620	2		1620	0.326436			1620	2.84825		1620	2		1620	0.64597
1621	6.98229		1621	0		1621	1.44926			1621	2.89706		1621	0		1621	1.0947
1622	7.06512		1622	2		1622	2.55438			1622	2.92362		1622	5		1622	1.53679
1623	7.08724		1623	16		1623	2.70486			1623	2.94862		1623	7		1623	1.26113
1624	7.16498		1624	14		1624	3.49608			1624	2.97717		1624	5		1624	1.7218
1625	7.13744		1625	4		1625	2.54155			1625	2.95495		1625	2		1625	1.37507
1626	7.11366		1626	26		1626	2.22098			1626	2.89564		1626	12		1626	1.30224
1627	7.1739		1627	2		1627	0			1627	2.87603		1627	1		1627	0
1628	7.16518		1628	0		1628	0			1628	2.82872		1628	1		1628	0
1629	7.11352		1629	0		1629	0			1629	2.79094		1629	0		1629	0
1630	7.17394		1630	0		1630	1.58454			1630	2.72302		1630	0		1630	1.11163
1631	7.13093		1631	1		1631	2.38218			1631	2.59022		1631	0		1631	1.84846
1632	7.17324		1632	19		1632	2.30758			1632	2.60287		1632	11		1632	1.95573
1633	7.12551		1633	10		1633	1.04551			1633	2.59698		1633	7		1633	0.824318
1634	7.0863		1634	0		1634	0.245617			1634	2.57198		1634	1		1634	0
1635	6.94674		1635	3		1635	2.09587			1635	2.59484		1635	0		1635	2.31858
1636	6.75107		1636	0		1636	2.91712			1636	2.5111		1636	1		1636	3.06464
1637	6.59981		1637	22		1637	2.99688			1637	2.48473		1637	21		1637	3.03138
1638	6.48235		1638	12		1638	1.08288			1638	2.5742		1638	7		1638	0.819603
1639	6.22326		1639	0		1639	0			1639	2.59416		1639	1		1639	0.308255
1640	6.15125		1640	0		1640	0			1640	2.64012		1640	0		1640	0.310895
1641	5.89832		1641	1		1641	0			1641	2.55131		1641	2		1641	0.31402
1642	5.81385		1642	0		1642	0			1642	2.52805		1642	1		1642	0
1643	5.67336		1643	0		1643	0			1643	2.56328		1643	0		1643	0
1644	5.52683		1644	0		1644	0			1644	2.51867		1644	1		1644	0
1645	5.39367		1645	1		1645	1.73393			1645	2.47779		1645	0		1645	0
1646	5.24648		1646	0		1646	1.67238			1646	2.38643		1646	0		1646	0
1647	5.06197		1647	15		1647	1.71663			1647	2.32294		1647	0		1647	0
1648	4.95404		1648	0		1648	0			1648	2.27894		1648	0		1648	0
1649	4.85308		1649	0		1649	0			1649	2.25946		1649	0		1649	0
1650	4.63592		1650	0		1650	0			1650	2.23985		1650	0		1650	0
1651	4.36731		1651	0		1651	0			1651	2.12496		1651	0		1651	0
1652	4.14927		1652	0		1652	0			1652	1.99947		1652	0		1652	0
1653	3.95292		1653	0		1653	0			1653	1.96026		1653	0		1653	0
1654	3.73782		1654	0		1654	0			1654	1.93394		1654	0		1654	0
1655	3.54336		1655	0		1655	0			1655	1.79451		1655	0		1655	0
1656	3.37502		1656	0		1656	0			1656	1.77125		1656	0		1656	0.653915
1657	3.10392		1657	0		1657	0			1657	1.62734		1657	0		1657	11.4155
1658	2.5152		1658	0		1658	0			1658	1.49489		1658	4		1658	12.2495
1659	2.13182		1659	0		1659	0			1659	1.36281		1659	60		1659	12.9344
1660	1.7374		1660	0		1660	0			1660	1.32197		1660	0		1660	0.648643
1661	1.54768		1661	0		1661	0			1661	1.21173		1661	3		1661	0.785022
1662	1.38511		1662	0		1662	0			1662	1.16625		1662	0		1662	0
1663	1.16577		1663	0		1663	0			1663	0.679193		1663	0		1663	0
1664	1.05127		1664	0		1664	0			1664	0.679193		1664	0		1664	0
1665	0.983517		1665	0		1665	0			1665	0.679193		1665	0		1665	0
										1666	0.679193		1666	0		1666	0
										1667	0.679193		1667	0		1667	0
										1668	0.679193		1668	0		1668	0
										1669	0.679193		1669	0		1669	0
										1670	0.679193		1670	0		1670	0
										1671	0.679193		1671	0		1671	0
										1672	0.652166		1672	0		1672	0
										1673	0.652166		1673	0		1673	0
										1674	0.652166		1674	0		1674	0
										1675	0.652166		1675	0		1675	0
										1676	0.631333		1676	0		1676	0
										1677	0.584858		1677	0		1677	0
										1678	0.564025		1678	0		1678	0
										1679	0.543192		1679	0		1679	0
										1680	0.491774		1680	0		1680	0
										1681	0.444709		1681	0		1681	0
										1682	0.396341		1682	0		1682	0
										1683	0.34848		1683	0		1683	0
