# Supplementary material for: Upstream open reading frames buffer translational variability during Drosophila evolution and development
Source: eLife. 2025 Jun 6;14:RP104074. doi: 10.7554/eLife.104074 (PMC12143884; doi:10.7554/eLife.104074)
Supplement: Figure 6—figure supplement 2—source data 1. [file elife-104074-fig6-figsupp2-data1.xlsx]

## Sheet: bcd_sample_cluster
	Mut-0-2-rep1	Mut-0-2-rep2	Mut-12-24-rep1	Mut-12-24-rep2	Mut-2-6-rep1	Mut-2-6-rep2	Mut-6-12-rep1	Mut-6-12-rep2	WT-0-2-rep1	WT-0-2-rep2	WT-12-24-rep1	WT-12-24-rep2	WT-2-6-rep1	WT-2-6-rep2	WT-6-12-rep1	WT-6-12-rep2
Mut-0-2-rep1	0	21.5972	259.511	259.446	118.555	119.257	177.628	179.462	93.3309	94.7231	271.011	270.183	126.393	123.943	195.862	198.15
Mut-0-2-rep2	21.5972	0	259.625	259.579	121.137	121.759	178.306	180.473	97.5768	99.0653	270.346	269.292	127.417	124.227	196.924	199.481
Mut-12-24-rep1	259.511	259.625	0	12.3372	217.388	216.551	130.542	130.118	194.168	194.305	61.6228	64.5791	174.625	176.608	101.865	102.051
Mut-12-24-rep2	259.446	259.579	12.3372	0	217.186	216.361	130.142	129.669	193.971	194.104	61.2146	64.1595	174.378	176.378	101.424	101.617
Mut-2-6-rep1	118.555	121.137	217.388	217.186	0	16.9424	123.609	124.221	104.969	105.556	236.154	236.278	66.1073	68.3835	140.986	142.304
Mut-2-6-rep2	119.257	121.759	216.551	216.361	16.9424	0	123.063	123.632	104.62	105.199	235.417	235.539	65.4398	67.8764	140.203	141.523
Mut-6-12-rep1	177.628	178.306	130.542	130.142	123.609	123.063	0	16.2432	132.504	133.031	159.552	159.924	95.5431	97.6537	59.4094	61.9512
Mut-6-12-rep2	179.462	180.473	130.118	129.669	124.221	123.632	16.2432	0	132.265	132.681	160.309	161.061	96.9365	100.015	57.6758	59.2882
WT-0-2-rep1	93.3309	97.5768	194.168	193.971	104.969	104.62	132.504	132.265	0	15.4722	209.543	210.043	83.6711	87.0464	134.792	135.631
WT-0-2-rep2	94.7231	99.0653	194.305	194.104	105.556	105.199	133.031	132.681	15.4722	0	209.929	210.519	84.5179	88.2293	134.885	135.604
WT-12-24-rep1	271.011	270.346	61.6228	61.2146	236.154	235.417	159.552	160.309	209.543	209.929	0	13.4634	191.242	191.631	130.31	131.757
WT-12-24-rep2	270.183	269.292	64.5791	64.1595	236.278	235.539	159.924	161.061	210.043	210.519	13.4634	0	191.093	191.064	131.962	133.773
WT-2-6-rep1	126.393	127.417	174.625	174.378	66.1073	65.4398	95.5431	96.9365	83.6711	84.5179	191.242	191.093	0	18.9198	102.14	104.597
WT-2-6-rep2	123.943	124.227	176.608	176.378	68.3835	67.8764	97.6537	100.015	87.0464	88.2293	191.631	191.064	18.9198	0	105.939	109.088
WT-6-12-rep1	195.862	196.924	101.865	101.424	140.986	140.203	59.4094	57.6758	134.792	134.885	130.31	131.962	102.14	105.939	0	13.0938
WT-6-12-rep2	198.15	199.481	102.051	101.617	142.304	141.523	61.9512	59.2882	135.631	135.604	131.757	133.773	104.597	109.088	13.0938	0
