# Supplementary material for: Upstream open reading frames buffer translational variability during Drosophila evolution and development
Source: eLife. 2025 Jun 6;14:RP104074. doi: 10.7554/eLife.104074 (PMC12143884; doi:10.7554/eLife.104074)
Supplement: Figure 6—figure supplement 3—source data 1. [file elife-104074-fig6-figsupp3-data1.xlsx]

## Sheet: FigS27
Sample	DEG	target_DEG	NonDEG	target_NonDEG	enrich_DEG	enrich_NonDEG	pvalue	enrich_score
embryo 0-2h	3884	80	6622	53	0.0205973	0.00800362	6.50436e-08	2.5735
embryo 2-6h	2358	30	8148	103	0.0127227	0.0126411	1	1.00645
embryo 6-12h	2901	49	7605	84	0.0168907	0.0110454	0.0234948	1.52921
embryo 12-24h	4164	69	6342	64	0.0165706	0.0100915	0.00547003	1.64204
