# Supplementary material for: Upstream open reading frames buffer translational variability during Drosophila evolution and development
Source: eLife. 2025 Jun 6;14:RP104074. doi: 10.7554/eLife.104074 (PMC12143884; doi:10.7554/eLife.104074)
Supplement: Figure 6—figure supplement 4—source data 1. [file elife-104074-fig6-figsupp4-data1.xlsx]

## Sheet: figS28
gene	stage	lfc_qPCR	lfcSE_qPCR	lfc_RNASeq	lfcSE_RNASeq	gene_name
FBgn0000140	0-2 h	-0.454477	0.0240718	-0.938976	0.109869	asp
FBgn0000140	12-24 h	1.52008	0.0166866	1.60223	0.153922	asp
FBgn0000140	2-6 h	0.0386341	0.0216507	0.374312	0.113948	asp
FBgn0000140	6-12 h	-0.260403	0.0255786	-0.181421	0.122902	asp
FBgn0000166	0-2 h	-0.3051	0.0498077	-0.306211	0.0924532	Bcd
FBgn0000166	12-24 h	0.616116	0.0221109	0.923513	0.231228	Bcd
FBgn0000166	2-6 h	-0.184059	0.0393947	-0.0651948	0.113324	Bcd
FBgn0000166	6-12 h	-0.557088	0.0317742	-0.366067	0.1463	Bcd
FBgn0000228	0-2 h	-1.13799	0.0212612	-0.827058	0.0863196	Nin
FBgn0000228	12-24 h	1.18851	0.0103505	1.13196	0.105411	Nin
FBgn0000228	2-6 h	-0.0934331	0.0214624	0.337849	0.103215	Nin
FBgn0000228	6-12 h	0.727541	0.0169772	0.25833	0.104547	Nin
FBgn0000233	0-2 h	-1.64859	0.233917	-1.51394	0.421168	btd
FBgn0000233	12-24 h	0.93574	0.0456644	1.193	0.562869	btd
FBgn0000233	2-6 h	0.511279	0.0132854	0.797706	0.167687	btd
FBgn0000233	6-12 h	-0.933513	0.0418107	-0.837839	0.280937	btd
FBgn0000411	0-2 h	-1.77079	0.0777161	-1.24237	0.159096	D
FBgn0000411	12-24 h	0.15798	0.0447216	0.162795	0.174106	D
FBgn0000411	2-6 h	0.0781237	0.0314519	0.17041	0.113035	D
FBgn0000411	6-12 h	-1.02051	0.073568	-0.736321	0.123456	D
FBgn0000576	0-2 h	-9.09927	0.0880427	-1.51679	0.389183	ems
FBgn0000576	12-24 h	-6.90302	0.03939	0.509802	0.25212	ems
FBgn0000576	2-6 h	-7.23484	0.0558603	0.289658	0.141218	ems
FBgn0000576	6-12 h	-8.25397	0.0673036	-0.834196	0.137735	ems
FBgn0001150	0-2 h	-1.6377	0.0213433	-1.35458	0.236615	gt
FBgn0001150	12-24 h	0.82993	0.0502527	2.29485	0.538965	gt
FBgn0001150	2-6 h	-0.291267	0.0198569	-0.16059	0.150474	gt
FBgn0001150	6-12 h	-1.1806	0.0174707	-0.853638	0.27697	gt
FBgn0001169	0-2 h	-1.23162	0.0287338	-1.15594	0.110931	Hairless
FBgn0001169	12-24 h	0.968162	0.021209	0.913458	0.151097	Hairless
FBgn0001169	2-6 h	0.436197	0.0625277	1.27603	0.112479	Hairless
FBgn0001169	6-12 h	-0.531803	0.025004	-0.724218	0.116031	Hairless
FBgn0001180	0-2 h	-0.904136	0.0180206	-1.06558	0.101026	hb
FBgn0001180	12-24 h	1.23153	0.0187029	1.46528	0.24205	hb
FBgn0001180	2-6 h	-0.109886	0.0538045	0.153347	0.133114	hb
FBgn0001180	6-12 h	-0.391593	0.025787	-0.608979	0.131661	hb
FBgn0001325	0-2 h	-1.52116	0.0235216	-1.23645	0.198024	Kr
FBgn0001325	12-24 h	0.0964692	0.0202462	-0.1124	0.179778	Kr
FBgn0001325	2-6 h	0.272984	0.0280553	0.393671	0.109502	Kr
FBgn0001325	6-12 h	-0.813892	0.0291079	-0.906138	0.133693	Kr
FBgn0003254	0-2 h	-1.49418	0.0106173	-2.12023	0.19243	rib
FBgn0003254	12-24 h	1.79594	0.0224003	1.87261	0.0995027	rib
FBgn0003254	2-6 h	0.402232	0.0249467	0.468262	0.11375	rib
FBgn0003254	6-12 h	-0.861272	0.00725431	-0.948942	0.104245	rib
FBgn0004102	0-2 h	-1.82359	0.0544553	-2.271	0.369083	otd
FBgn0004102	12-24 h	0.997451	0.0407722	0.695256	0.218956	otd
FBgn0004102	2-6 h	0.727853	0.0204607	1.45518	0.192292	otd
FBgn0004102	6-12 h	-2.02331	0.0318214	-2.45854	0.158316	otd
FBgn0004449	0-2 h	-1.22676	0.0321758	-1.81903	0.131532	Ten-m
FBgn0004449	12-24 h	0.871214	0.0110656	0.929471	0.192385	Ten-m
FBgn0004449	2-6 h	0.0790014	0.019816	0.668596	0.290782	Ten-m
FBgn0004449	6-12 h	-1.05208	0.0409771	-1.00761	0.273878	Ten-m
FBgn0004567	0-2 h	-1.85071	0.0302603	-1.48837	0.547754	slp2
FBgn0004567	12-24 h	0.748298	0.0182736	0.833029	0.249649	slp2
FBgn0004567	2-6 h	0.242047	0.0270848	0.586075	0.131942	slp2
FBgn0004567	6-12 h	-0.571081	0.0222951	-0.423635	0.147491	slp2
FBgn0023214	0-2 h	-2.14697	0.0650803	-1.1593	0.472888	edl
FBgn0023214	12-24 h	0.919432	0.0595967	1.31526	0.16097	edl
FBgn0023214	2-6 h	0.635677	0.155741	0.548413	0.118143	edl
FBgn0023214	6-12 h	-0.925198	0.035986	-0.222815	0.113721	edl
FBgn0025456	0-2 h	-0.97168	0.036764	0.635112	0.158027	CREG
FBgn0025456	12-24 h	0.395906	0.021163	0.948149	0.172897	CREG
FBgn0025456	2-6 h	0.238059	0.0108509	0.669101	0.134817	CREG
FBgn0025456	6-12 h	0.355457	0.0192905	0.615057	0.175507	CREG
FBgn0029114	0-2 h	-1.73048	0.0276143	-2.76867	0.13819	Toll
FBgn0029114	12-24 h	1.3878	0.0464559	1.41026	0.140956	Toll
FBgn0029114	2-6 h	-0.0311902	0.117233	0.311626	0.109158	Toll
FBgn0029114	6-12 h	-0.628185	0.0313916	-0.736232	0.113761	Toll
FBgn0029941	0-2 h	-0.540199	0.0189976	-0.969461	0.0896609	CG1677
FBgn0029941	12-24 h	1.31938	0.0132985	0.854673	0.0762314	CG1677
FBgn0029941	2-6 h	-0.0504373	0.0111234	0.205455	0.109972	CG1677
FBgn0029941	6-12 h	0.505203	0.0137567	1.14174	0.0941004	CG1677
FBgn0259985	0-2 h	-0.772625	0.0156444	0.0834706	0.113933	Mppe
FBgn0259985	12-24 h	0.643183	0.0467932	0.614102	0.203753	Mppe
FBgn0259985	2-6 h	0.0628272	0.0407437	0.57312	0.121612	Mppe
FBgn0259985	6-12 h	0.0468229	0.00960521	0.134089	0.152923	Mppe
FBgn0261648	0-2 h	-1.29887	0.0363441	-2.46441	0.280594	salm
FBgn0261648	12-24 h	0.560026	0.0115731	0.168445	0.168931	salm
FBgn0261648	2-6 h	-0.0995083	0.0985878	0.302123	0.153547	salm
FBgn0261648	6-12 h	-0.822496	0.0357807	-1.26554	0.137117	salm
FBgn0262975	0-2 h	-0.175525	0.0163336	-0.657509	0.0893486	cnc
FBgn0262975	12-24 h	-0.0571061	0.0592614	0.0946005	0.086164	cnc
FBgn0262975	2-6 h	-0.00457478	0.145514	0.397063	0.135346	cnc
FBgn0262975	6-12 h	-0.75518	0.0323684	-0.841758	0.124612	cnc
