# Supplementary material for: Upstream open reading frames buffer translational variability during Drosophila evolution and development
Source: eLife. 2025 Jun 6;14:RP104074. doi: 10.7554/eLife.104074 (PMC12143884; doi:10.7554/eLife.104074)
Supplement: Figure 6—source data 1. [file elife-104074-fig6-data1.xlsx]

## Sheet: fig6C
Line	Replication	temperature	PM_ratio	mean_PM_ratio	std_PM_ratio
uKO2/uKO2	1	25	1.29129	1.25275	0.114251
uKO2/uKO2	2	25	1.53518	1.25275	0.114251
uKO2/uKO2	3	25	0.821486	1.25275	0.114251
uKO2/uKO2	4	25	1.36665	1.25275	0.114251
uKO2/uKO2	5	25	1.48692	1.25275	0.114251
uKO2/uKO2	6	25	1.01495	1.25275	0.114251
uKO1/uKO1	1	25	1.05262	1.27115	0.0602175
uKO1/uKO1	2	25	1.38764	1.27115	0.0602175
uKO1/uKO1	3	25	1.12939	1.27115	0.0602175
uKO1/uKO1	4	25	1.28877	1.27115	0.0602175
uKO1/uKO1	5	25	1.41142	1.27115	0.0602175
uKO1/uKO1	6	25	1.35706	1.27115	0.0602175
WT	1	25	0.874095	1	0.0961175
WT	2	25	1.30204	1	0.0961175
WT	3	25	0.825283	1	0.0961175
WT	4	25	0.886959	1	0.0961175
WT	5	25	1.30132	1	0.0961175
WT	6	25	0.810309	1	0.0961175
uKO2/uKO2	1	29	1.32146	1.79884	0.156245
uKO2/uKO2	2	29	2.21692	1.79884	0.156245
uKO2/uKO2	3	29	1.7576	1.79884	0.156245
uKO2/uKO2	4	29	1.38499	1.79884	0.156245
uKO2/uKO2	5	29	1.94546	1.79884	0.156245
uKO2/uKO2	6	29	2.16657	1.79884	0.156245
uKO1/uKO1	1	29	1.92501	2.13366	0.110434
uKO1/uKO1	2	29	1.9759	2.13366	0.110434
uKO1/uKO1	3	29	1.88609	2.13366	0.110434
uKO1/uKO1	4	29	2.07766	2.13366	0.110434
uKO1/uKO1	5	29	2.40313	2.13366	0.110434
uKO1/uKO1	6	29	2.53417	2.13366	0.110434
WT	1	29	1.26344	1	0.171502
WT	2	29	0.26384	1	0.171502
WT	3	29	0.907765	1	0.171502
WT	4	29	1.499	1	0.171502
WT	5	29	0.957569	1	0.171502
WT	6	29	1.10838	1	0.171502

## Sheet: Fig6D
Types	Replication	Normalized_intensity	Normalized_intensity_mean	Normalized_intensity_std
WT	1	1.08693	1	0.032816
WT	2	1.07139	1	0.032816
WT	3	0.888562	1	0.032816
WT	4	0.994929	1	0.032816
WT	5	0.922812	1	0.032816
WT	6	1.03538	1	0.032816
uKO1	1	2.24212	1.89995	0.116752
uKO1	2	1.88845	1.89995	0.116752
uKO1	3	2.20457	1.89995	0.116752
uKO1	4	1.84664	1.89995	0.116752
uKO1	5	1.72455	1.89995	0.116752
uKO1	6	1.49336	1.89995	0.116752
uKO2	1	1.55715	1.98253	0.0881771
uKO2	2	2.06663	1.98253	0.0881771
uKO2	3	2.05487	1.98253	0.0881771
uKO2	4	1.96995	1.98253	0.0881771
uKO2	5	2.11258	1.98253	0.0881771
uKO2	6	2.13397	1.98253	0.0881771

## Sheet: Fig6E
Differential expressed genes under 29						Differential expressed genes under 25
0-2h embryo	2-6h embryo	6-12h embryo	12-24h embryo			0-2h embryo	2-6h embryo	6-12h embryo	12-24h embryo
FBgn0000014	FBgn0000017	FBgn0000014	FBgn0000008			FBgn0000014	FBgn0000022	FBgn0000078	FBgn0000017
FBgn0000015	FBgn0000028	FBgn0000015	FBgn0000017			FBgn0000024	FBgn0000044	FBgn0000114	FBgn0000018
FBgn0000017	FBgn0000044	FBgn0000022	FBgn0000028			FBgn0000036	FBgn0000052	FBgn0000120	FBgn0000024
FBgn0000024	FBgn0000077	FBgn0000024	FBgn0000045			FBgn0000044	FBgn0000077	FBgn0000139	FBgn0000032
FBgn0000038	FBgn0000079	FBgn0000036	FBgn0000057			FBgn0000046	FBgn0000084	FBgn0000150	FBgn0000043
FBgn0000044	FBgn0000084	FBgn0000037	FBgn0000061			FBgn0000227	FBgn0000108	FBgn0000166	FBgn0000057
FBgn0000046	FBgn0000097	FBgn0000057	FBgn0000063			FBgn0000229	FBgn0000114	FBgn0000228	FBgn0000064
FBgn0000071	FBgn0000116	FBgn0000075	FBgn0000071			FBgn0000317	FBgn0000116	FBgn0000239	FBgn0000071
FBgn0000077	FBgn0000147	FBgn0000078	FBgn0000075			FBgn0000406	FBgn0000147	FBgn0000253	FBgn0000075
FBgn0000078	FBgn0000157	FBgn0000079	FBgn0000078			FBgn0000411	FBgn0000158	FBgn0000326	FBgn0000078
FBgn0000084	FBgn0000173	FBgn0000083	FBgn0000092			FBgn0000635	FBgn0000251	FBgn0000376	FBgn0000117
FBgn0000097	FBgn0000179	FBgn0000084	FBgn0000097			FBgn0001085	FBgn0000256	FBgn0000382	FBgn0000139
FBgn0000100	FBgn0000227	FBgn0000097	FBgn0000100			FBgn0001145	FBgn0000370	FBgn0000405	FBgn0000140
FBgn0000108	FBgn0000233	FBgn0000108	FBgn0000108			FBgn0001150	FBgn0000406	FBgn0000422	FBgn0000146
FBgn0000109	FBgn0000239	FBgn0000117	FBgn0000114			FBgn0001174	FBgn0000454	FBgn0000454	FBgn0000150
FBgn0000115	FBgn0000253	FBgn0000139	FBgn0000116			FBgn0001224	FBgn0000497	FBgn0000567	FBgn0000153
FBgn0000116	FBgn0000259	FBgn0000147	FBgn0000117			FBgn0001230	FBgn0000562	FBgn0000592	FBgn0000158
FBgn0000119	FBgn0000273	FBgn0000157	FBgn0000120			FBgn0001250	FBgn0000579	FBgn0000721	FBgn0000163
FBgn0000140	FBgn0000283	FBgn0000158	FBgn0000121			FBgn0001257	FBgn0000615	FBgn0000996	FBgn0000166
FBgn0000150	FBgn0000299	FBgn0000163	FBgn0000137			FBgn0001258	FBgn0000633	FBgn0001128	FBgn0000180
FBgn0000180	FBgn0000307	FBgn0000179	FBgn0000140			FBgn0001297	FBgn0000826	FBgn0001139	FBgn0000212
FBgn0000181	FBgn0000308	FBgn0000210	FBgn0000146			FBgn0001311	FBgn0000927	FBgn0001145	FBgn0000228
FBgn0000210	FBgn0000317	FBgn0000216	FBgn0000150			FBgn0001320	FBgn0001091	FBgn0001149	FBgn0000241
FBgn0000212	FBgn0000351	FBgn0000227	FBgn0000158			FBgn0001987	FBgn0001092	FBgn0001187	FBgn0000303
FBgn0000221	FBgn0000355	FBgn0000233	FBgn0000163			FBgn0001991	FBgn0001120	FBgn0001206	FBgn0000316
FBgn0000228	FBgn0000370	FBgn0000246	FBgn0000166			FBgn0002526	FBgn0001125	FBgn0001225	FBgn0000317
FBgn0000233	FBgn0000382	FBgn0000259	FBgn0000179			FBgn0002571	FBgn0001128	FBgn0001254	FBgn0000376
FBgn0000246	FBgn0000384	FBgn0000261	FBgn0000180			FBgn0002578	FBgn0001145	FBgn0001285	FBgn0000404
FBgn0000247	FBgn0000406	FBgn0000286	FBgn0000212			FBgn0002719	FBgn0001149	FBgn0001974	FBgn0000405
FBgn0000256	FBgn0000451	FBgn0000299	FBgn0000228			FBgn0002772	FBgn0001186	FBgn0002440	FBgn0000409
FBgn0000257	FBgn0000454	FBgn0000303	FBgn0000241			FBgn0002868	FBgn0001225	FBgn0002466	FBgn0000412
FBgn0000273	FBgn0000463	FBgn0000307	FBgn0000246			FBgn0002905	FBgn0001226	FBgn0002535	FBgn0000447
FBgn0000274	FBgn0000479	FBgn0000316	FBgn0000281			FBgn0002917	FBgn0001230	FBgn0002571	FBgn0000463
FBgn0000283	FBgn0000499	FBgn0000326	FBgn0000283			FBgn0003057	FBgn0001233	FBgn0002577	FBgn0000477
FBgn0000286	FBgn0000504	FBgn0000339	FBgn0000289			FBgn0003060	FBgn0001248	FBgn0002578	FBgn0000479
FBgn0000299	FBgn0000541	FBgn0000355	FBgn0000303			FBgn0003089	FBgn0001285	FBgn0002638	FBgn0000489
FBgn0000303	FBgn0000546	FBgn0000370	FBgn0000317			FBgn0003137	FBgn0001991	FBgn0002645	FBgn0000499
FBgn0000307	FBgn0000547	FBgn0000377	FBgn0000318			FBgn0003227	FBgn0002036	FBgn0002673	FBgn0000535
FBgn0000317	FBgn0000575	FBgn0000405	FBgn0000319			FBgn0003345	FBgn0002592	FBgn0002772	FBgn0000547
FBgn0000318	FBgn0000579	FBgn0000406	FBgn0000352			FBgn0003356	FBgn0002645	FBgn0002773	FBgn0000568
FBgn0000319	FBgn0000606	FBgn0000411	FBgn0000376			FBgn0003380	FBgn0002772	FBgn0002789	FBgn0000579
FBgn0000320	FBgn0000615	FBgn0000422	FBgn0000382			FBgn0003386	FBgn0002773	FBgn0002868	FBgn0000615
FBgn0000339	FBgn0000635	FBgn0000448	FBgn0000394			FBgn0003410	FBgn0002789	FBgn0002872	FBgn0000636
FBgn0000370	FBgn0000659	FBgn0000451	FBgn0000404			FBgn0003459	FBgn0002878	FBgn0002906	FBgn0000715
FBgn0000382	FBgn0000662	FBgn0000459	FBgn0000405			FBgn0003486	FBgn0002906	FBgn0002924	FBgn0000996
FBgn0000394	FBgn0000711	FBgn0000463	FBgn0000406			FBgn0003507	FBgn0002917	FBgn0003015	FBgn0001078
FBgn0000395	FBgn0000721	FBgn0000477	FBgn0000409			FBgn0003654	FBgn0002962	FBgn0003023	FBgn0001079
FBgn0000406	FBgn0000810	FBgn0000479	FBgn0000416			FBgn0003683	FBgn0003015	FBgn0003057	FBgn0001083
FBgn0000411	FBgn0000826	FBgn0000489	FBgn0000447			FBgn0003719	FBgn0003023	FBgn0003060	FBgn0001086
FBgn0000414	FBgn0000927	FBgn0000490	FBgn0000448			FBgn0003720	FBgn0003071	FBgn0003065	FBgn0001104
FBgn0000416	FBgn0000996	FBgn0000492	FBgn0000451			FBgn0003886	FBgn0003089	FBgn0003086	FBgn0001112
FBgn0000426	FBgn0001078	FBgn0000497	FBgn0000455			FBgn0003890	FBgn0003149	FBgn0003087	FBgn0001120
FBgn0000439	FBgn0001079	FBgn0000499	FBgn0000459			FBgn0003963	FBgn0003159	FBgn0003089	FBgn0001128
FBgn0000447	FBgn0001091	FBgn0000527	FBgn0000463			FBgn0004028	FBgn0003187	FBgn0003114	FBgn0001145
FBgn0000451	FBgn0001092	FBgn0000535	FBgn0000477			FBgn0004053	FBgn0003204	FBgn0003124	FBgn0001148
FBgn0000455	FBgn0001105	FBgn0000541	FBgn0000497			FBgn0004117	FBgn0003218	FBgn0003149	FBgn0001197
FBgn0000459	FBgn0001114	FBgn0000542	FBgn0000499			FBgn0004143	FBgn0003227	FBgn0003227	FBgn0001202
FBgn0000463	FBgn0001120	FBgn0000546	FBgn0000500			FBgn0004169	FBgn0003301	FBgn0003231	FBgn0001206
FBgn0000464	FBgn0001122	FBgn0000547	FBgn0000524			FBgn0004198	FBgn0003312	FBgn0003346	FBgn0001216
FBgn0000489	FBgn0001125	FBgn0000551	FBgn0000542			FBgn0004389	FBgn0003356	FBgn0003483	FBgn0001224
FBgn0000490	FBgn0001128	FBgn0000559	FBgn0000546			FBgn0004513	FBgn0003401	FBgn0003655	FBgn0001225
FBgn0000497	FBgn0001138	FBgn0000560	FBgn0000547			FBgn0004516	FBgn0003410	FBgn0003701	FBgn0001226
FBgn0000520	FBgn0001139	FBgn0000566	FBgn0000564			FBgn0004575	FBgn0003483	FBgn0003732	FBgn0001230
FBgn0000541	FBgn0001145	FBgn0000567	FBgn0000565			FBgn0004646	FBgn0003495	FBgn0003733	FBgn0001257
FBgn0000542	FBgn0001149	FBgn0000568	FBgn0000567			FBgn0004852	FBgn0003527	FBgn0003965	FBgn0001258
FBgn0000546	FBgn0001169	FBgn0000575	FBgn0000568			FBgn0004880	FBgn0003654	FBgn0004034	FBgn0001276
FBgn0000547	FBgn0001174	FBgn0000576	FBgn0000578			FBgn0004926	FBgn0003683	FBgn0004117	FBgn0001321
FBgn0000565	FBgn0001185	FBgn0000577	FBgn0000579			FBgn0005586	FBgn0004028	FBgn0004363	FBgn0001974
FBgn0000568	FBgn0001206	FBgn0000578	FBgn0000591			FBgn0005590	FBgn0004052	FBgn0004378	FBgn0002022
FBgn0000575	FBgn0001208	FBgn0000625	FBgn0000592			FBgn0005666	FBgn0004117	FBgn0004430	FBgn0002174
FBgn0000576	FBgn0001220	FBgn0000633	FBgn0000615			FBgn0010225	FBgn0004169	FBgn0004516	FBgn0002440
FBgn0000577	FBgn0001225	FBgn0000635	FBgn0000618			FBgn0010228	FBgn0004389	FBgn0004598	FBgn0002466
FBgn0000578	FBgn0001226	FBgn0000636	FBgn0000635			FBgn0010357	FBgn0004397	FBgn0004649	FBgn0002521
FBgn0000579	FBgn0001229	FBgn0000644	FBgn0000636			FBgn0010387	FBgn0004649	FBgn0004652	FBgn0002543
FBgn0000581	FBgn0001230	FBgn0000659	FBgn0000659			FBgn0010424	FBgn0004650	FBgn0004654	FBgn0002564
FBgn0000606	FBgn0001233	FBgn0000721	FBgn0000662			FBgn0010425	FBgn0004654	FBgn0004698	FBgn0002578
FBgn0000618	FBgn0001234	FBgn0000810	FBgn0000715			FBgn0010434	FBgn0004841	FBgn0004777	FBgn0002592
FBgn0000633	FBgn0001235	FBgn0000826	FBgn0000721			FBgn0010531	FBgn0004872	FBgn0004778	FBgn0002632
FBgn0000635	FBgn0001248	FBgn0000927	FBgn0000723			FBgn0010651	FBgn0004882	FBgn0004779	FBgn0002633
FBgn0000636	FBgn0001257	FBgn0000928	FBgn0000810			FBgn0011227	FBgn0004914	FBgn0004780	FBgn0002638
FBgn0000658	FBgn0001258	FBgn0000996	FBgn0000826			FBgn0011286	FBgn0005390	FBgn0004781	FBgn0002673
FBgn0000659	FBgn0001285	FBgn0001075	FBgn0000927			FBgn0011288	FBgn0005592	FBgn0004782	FBgn0002715
FBgn0000719	FBgn0001291	FBgn0001077	FBgn0000928			FBgn0011296	FBgn0005666	FBgn0004783	FBgn0002719
FBgn0000723	FBgn0001308	FBgn0001078	FBgn0000996			FBgn0011556	FBgn0005671	FBgn0004795	FBgn0002736
FBgn0000808	FBgn0001323	FBgn0001079	FBgn0001075			FBgn0011603	FBgn0005695	FBgn0004924	FBgn0002775
FBgn0000810	FBgn0001404	FBgn0001083	FBgn0001078			FBgn0011722	FBgn0010039	FBgn0005626	FBgn0002781
FBgn0000826	FBgn0001624	FBgn0001085	FBgn0001079			FBgn0012037	FBgn0010097	FBgn0005630	FBgn0002783
FBgn0001075	FBgn0001991	FBgn0001086	FBgn0001086			FBgn0013276	FBgn0010226	FBgn0005632	FBgn0002789
FBgn0001077	FBgn0001994	FBgn0001087	FBgn0001089			FBgn0013342	FBgn0010235	FBgn0010015	FBgn0002868
FBgn0001078	FBgn0002036	FBgn0001098	FBgn0001091			FBgn0013672	FBgn0010246	FBgn0010213	FBgn0002872
FBgn0001079	FBgn0002121	FBgn0001105	FBgn0001092			FBgn0013755	FBgn0010288	FBgn0010226	FBgn0002873
FBgn0001084	FBgn0002283	FBgn0001122	FBgn0001104			FBgn0014342	FBgn0010391	FBgn0010241	FBgn0002906
FBgn0001085	FBgn0002354	FBgn0001124	FBgn0001112			FBgn0014388	FBgn0010397	FBgn0010246	FBgn0002924
FBgn0001090	FBgn0002431	FBgn0001128	FBgn0001120			FBgn0014417	FBgn0010421	FBgn0010247	FBgn0002932
FBgn0001091	FBgn0002521	FBgn0001138	FBgn0001124			FBgn0014863	FBgn0010431	FBgn0010282	FBgn0003015
FBgn0001092	FBgn0002570	FBgn0001145	FBgn0001125			FBgn0015011	FBgn0010482	FBgn0010314	FBgn0003016
FBgn0001114	FBgn0002571	FBgn0001150	FBgn0001128			FBgn0015393	FBgn0010497	FBgn0010342	FBgn0003057
FBgn0001120	FBgn0002578	FBgn0001168	FBgn0001138			FBgn0015399	FBgn0010531	FBgn0010357	FBgn0003060
FBgn0001122	FBgn0002643	FBgn0001169	FBgn0001139			FBgn0015558	FBgn0010551	FBgn0010387	FBgn0003062
FBgn0001123	FBgn0002673	FBgn0001180	FBgn0001145			FBgn0015577	FBgn0010591	FBgn0010395	FBgn0003065
FBgn0001124	FBgn0002772	FBgn0001187	FBgn0001147			FBgn0015714	FBgn0010611	FBgn0010431	FBgn0003074
FBgn0001125	FBgn0002773	FBgn0001202	FBgn0001148			FBgn0015766	FBgn0010621	FBgn0010482	FBgn0003086
FBgn0001138	FBgn0002789	FBgn0001206	FBgn0001150			FBgn0015774	FBgn0010812	FBgn0010497	FBgn0003087
FBgn0001142	FBgn0002868	FBgn0001208	FBgn0001169			FBgn0015777	FBgn0011211	FBgn0010549	FBgn0003114
FBgn0001145	FBgn0002872	FBgn0001216	FBgn0001180			FBgn0015872	FBgn0011661	FBgn0011227	FBgn0003124
FBgn0001149	FBgn0002899	FBgn0001225	FBgn0001187			FBgn0016013	FBgn0011703	FBgn0011283	FBgn0003159
FBgn0001150	FBgn0002906	FBgn0001226	FBgn0001197			FBgn0016054	FBgn0011761	FBgn0011288	FBgn0003174
FBgn0001168	FBgn0002932	FBgn0001230	FBgn0001206			FBgn0016075	FBgn0011768	FBgn0011296	FBgn0003187
FBgn0001169	FBgn0002945	FBgn0001235	FBgn0001208			FBgn0016123	FBgn0011774	FBgn0011554	FBgn0003204
FBgn0001174	FBgn0002962	FBgn0001250	FBgn0001222			FBgn0016926	FBgn0011826	FBgn0011556	FBgn0003205
FBgn0001180	FBgn0003015	FBgn0001253	FBgn0001224			FBgn0017448	FBgn0012036	FBgn0011586	FBgn0003227
FBgn0001206	FBgn0003016	FBgn0001254	FBgn0001225			FBgn0017590	FBgn0013342	FBgn0011695	FBgn0003231
FBgn0001208	FBgn0003023	FBgn0001256	FBgn0001226			FBgn0019985	FBgn0013686	FBgn0011737	FBgn0003256
FBgn0001215	FBgn0003053	FBgn0001285	FBgn0001230			FBgn0020300	FBgn0013772	FBgn0011761	FBgn0003257
FBgn0001225	FBgn0003057	FBgn0001297	FBgn0001235			FBgn0020415	FBgn0013995	FBgn0013467	FBgn0003261
FBgn0001234	FBgn0003060	FBgn0001319	FBgn0001248			FBgn0020508	FBgn0014184	FBgn0013679	FBgn0003275
FBgn0001235	FBgn0003074	FBgn0001320	FBgn0001253			FBgn0020521	FBgn0014427	FBgn0013732	FBgn0003278
FBgn0001250	FBgn0003082	FBgn0001321	FBgn0001254			FBgn0020906	FBgn0014455	FBgn0013746	FBgn0003308
FBgn0001253	FBgn0003087	FBgn0001323	FBgn0001256			FBgn0022702	FBgn0014869	FBgn0013756	FBgn0003317
FBgn0001256	FBgn0003118	FBgn0001325	FBgn0001257			FBgn0022770	FBgn0014877	FBgn0013772	FBgn0003330
FBgn0001257	FBgn0003134	FBgn0001565	FBgn0001276			FBgn0022774	FBgn0015019	FBgn0013773	FBgn0003346
FBgn0001258	FBgn0003149	FBgn0001942	FBgn0001285			FBgn0023023	FBgn0015218	FBgn0013949	FBgn0003356
FBgn0001269	FBgn0003165	FBgn0001974	FBgn0001296			FBgn0023094	FBgn0015239	FBgn0014340	FBgn0003360
FBgn0001296	FBgn0003204	FBgn0001986	FBgn0001297			FBgn0023179	FBgn0015245	FBgn0014368	FBgn0003380
FBgn0001297	FBgn0003210	FBgn0001990	FBgn0001311			FBgn0023458	FBgn0015359	FBgn0014417	FBgn0003391
FBgn0001301	FBgn0003218	FBgn0001991	FBgn0001316			FBgn0023479	FBgn0015399	FBgn0014469	FBgn0003410
FBgn0001311	FBgn0003227	FBgn0001994	FBgn0001319			FBgn0023531	FBgn0015522	FBgn0014863	FBgn0003411
FBgn0001316	FBgn0003231	FBgn0002022	FBgn0001321			FBgn0023537	FBgn0015553	FBgn0014931	FBgn0003416
FBgn0001319	FBgn0003256	FBgn0002306	FBgn0001323			FBgn0024150	FBgn0015614	FBgn0015001	FBgn0003447
FBgn0001320	FBgn0003277	FBgn0002466	FBgn0001324			FBgn0024179	FBgn0015766	FBgn0015010	FBgn0003502
FBgn0001323	FBgn0003285	FBgn0002543	FBgn0001612			FBgn0024232	FBgn0015777	FBgn0015032	FBgn0003525
FBgn0001324	FBgn0003345	FBgn0002564	FBgn0001624			FBgn0024289	FBgn0016031	FBgn0015320	FBgn0003567
FBgn0001325	FBgn0003356	FBgn0002569	FBgn0001974			FBgn0024293	FBgn0016053	FBgn0015391	FBgn0003598
FBgn0001341	FBgn0003357	FBgn0002570	FBgn0001983			FBgn0024963	FBgn0016054	FBgn0015477	FBgn0003607
FBgn0001404	FBgn0003358	FBgn0002571	FBgn0001989			FBgn0024989	FBgn0016075	FBgn0015570	FBgn0003655
FBgn0001491	FBgn0003371	FBgn0002573	FBgn0001990			FBgn0025643	FBgn0016650	FBgn0015577	FBgn0003701
FBgn0001624	FBgn0003391	FBgn0002577	FBgn0001991			FBgn0025687	FBgn0016693	FBgn0015625	FBgn0003732
FBgn0001965	FBgn0003396	FBgn0002579	FBgn0001994			FBgn0025740	FBgn0016970	FBgn0015766	FBgn0003733
FBgn0001977	FBgn0003401	FBgn0002593	FBgn0002021			FBgn0025837	FBgn0017430	FBgn0015872	FBgn0003888
FBgn0001981	FBgn0003435	FBgn0002626	FBgn0002031			FBgn0026077	FBgn0017561	FBgn0015926	FBgn0003892
FBgn0001986	FBgn0003447	FBgn0002631	FBgn0002036			FBgn0026160	FBgn0019982	FBgn0016034	FBgn0003943
FBgn0001987	FBgn0003463	FBgn0002632	FBgn0002121			FBgn0026403	FBgn0020269	FBgn0016054	FBgn0003997
FBgn0001989	FBgn0003502	FBgn0002633	FBgn0002174			FBgn0026439	FBgn0020379	FBgn0016070	FBgn0004057
FBgn0001991	FBgn0003513	FBgn0002638	FBgn0002306			FBgn0026562	FBgn0020392	FBgn0017448	FBgn0004106
FBgn0001994	FBgn0003520	FBgn0002643	FBgn0002354			FBgn0026718	FBgn0020415	FBgn0019644	FBgn0004108
FBgn0001995	FBgn0003527	FBgn0002645	FBgn0002440			FBgn0026721	FBgn0020445	FBgn0019982	FBgn0004227
FBgn0002021	FBgn0003575	FBgn0002673	FBgn0002466			FBgn0026754	FBgn0020637	FBgn0020224	FBgn0004244
FBgn0002031	FBgn0003651	FBgn0002723	FBgn0002526			FBgn0027070	FBgn0020653	FBgn0020508	FBgn0004362
FBgn0002036	FBgn0003654	FBgn0002736	FBgn0002543			FBgn0027073	FBgn0021750	FBgn0020639	FBgn0004364
FBgn0002044	FBgn0003676	FBgn0002783	FBgn0002564			FBgn0027111	FBgn0021765	FBgn0020640	FBgn0004374
FBgn0002121	FBgn0003683	FBgn0002789	FBgn0002569			FBgn0027330	FBgn0022097	FBgn0020641	FBgn0004378
FBgn0002174	FBgn0003701	FBgn0002872	FBgn0002571			FBgn0027341	FBgn0022382	FBgn0020642	FBgn0004395
FBgn0002283	FBgn0003714	FBgn0002887	FBgn0002577			FBgn0027491	FBgn0022702	FBgn0020645	FBgn0004512
FBgn0002306	FBgn0003751	FBgn0002905	FBgn0002578			FBgn0027556	FBgn0022772	FBgn0020906	FBgn0004514
FBgn0002354	FBgn0003863	FBgn0002906	FBgn0002579			FBgn0027560	FBgn0023083	FBgn0020907	FBgn0004577
FBgn0002431	FBgn0003865	FBgn0002917	FBgn0002590			FBgn0027571	FBgn0023094	FBgn0021750	FBgn0004584
FBgn0002441	FBgn0003886	FBgn0002921	FBgn0002592			FBgn0027585	FBgn0023458	FBgn0022355	FBgn0004647
FBgn0002466	FBgn0003890	FBgn0002924	FBgn0002607			FBgn0027596	FBgn0023515	FBgn0022709	FBgn0004649
FBgn0002526	FBgn0003891	FBgn0002931	FBgn0002629			FBgn0027600	FBgn0023534	FBgn0022981	FBgn0004652
FBgn0002543	FBgn0003922	FBgn0002945	FBgn0002632			FBgn0027611	FBgn0023537	FBgn0022987	FBgn0004654
FBgn0002552	FBgn0003944	FBgn0003002	FBgn0002633			FBgn0027654	FBgn0023540	FBgn0023216	FBgn0004698
FBgn0002571	FBgn0003984	FBgn0003009	FBgn0002638			FBgn0028331	FBgn0024177	FBgn0023407	FBgn0004781
FBgn0002578	FBgn0003997	FBgn0003028	FBgn0002645			FBgn0028699	FBgn0024179	FBgn0023496	FBgn0004782
FBgn0002579	FBgn0004028	FBgn0003044	FBgn0002673			FBgn0028707	FBgn0024315	FBgn0023507	FBgn0004783
FBgn0002593	FBgn0004034	FBgn0003053	FBgn0002715			FBgn0028862	FBgn0024329	FBgn0023528	FBgn0004795
FBgn0002607	FBgn0004049	FBgn0003057	FBgn0002732			FBgn0028863	FBgn0024556	FBgn0023537	FBgn0004811
FBgn0002622	FBgn0004052	FBgn0003060	FBgn0002734			FBgn0028875	FBgn0024804	FBgn0024293	FBgn0004839
FBgn0002626	FBgn0004057	FBgn0003087	FBgn0002735			FBgn0028920	FBgn0024841	FBgn0024510	FBgn0004852
FBgn0002633	FBgn0004087	FBgn0003089	FBgn0002772			FBgn0028993	FBgn0024846	FBgn0024542	FBgn0004865
FBgn0002641	FBgn0004102	FBgn0003091	FBgn0002773			FBgn0028996	FBgn0024957	FBgn0024698	FBgn0004915
FBgn0002643	FBgn0004117	FBgn0003093	FBgn0002778			FBgn0029002	FBgn0024991	FBgn0024732	FBgn0004924
FBgn0002645	FBgn0004169	FBgn0003114	FBgn0002781			FBgn0029114	FBgn0024994	FBgn0024740	FBgn0005355
FBgn0002734	FBgn0004177	FBgn0003118	FBgn0002783			FBgn0029167	FBgn0025352	FBgn0024921	FBgn0005612
FBgn0002735	FBgn0004198	FBgn0003124	FBgn0002789			FBgn0029639	FBgn0025456	FBgn0024984	FBgn0005630
FBgn0002736	FBgn0004369	FBgn0003149	FBgn0002868			FBgn0029648	FBgn0025628	FBgn0024989	FBgn0005638
FBgn0002772	FBgn0004370	FBgn0003162	FBgn0002869			FBgn0029723	FBgn0025874	FBgn0024995	FBgn0005664
FBgn0002773	FBgn0004373	FBgn0003165	FBgn0002872			FBgn0029761	FBgn0026084	FBgn0025388	FBgn0005671
FBgn0002774	FBgn0004378	FBgn0003174	FBgn0002873			FBgn0029814	FBgn0026252	FBgn0025454	FBgn0005695
FBgn0002780	FBgn0004381	FBgn0003187	FBgn0002891			FBgn0029864	FBgn0026263	FBgn0025608	FBgn0010040
FBgn0002783	FBgn0004389	FBgn0003210	FBgn0002901			FBgn0029866	FBgn0026309	FBgn0025620	FBgn0010100
FBgn0002789	FBgn0004390	FBgn0003227	FBgn0002906			FBgn0029878	FBgn0026404	FBgn0025635	FBgn0010105
FBgn0002868	FBgn0004395	FBgn0003231	FBgn0002922			FBgn0029881	FBgn0026417	FBgn0025743	FBgn0010194
FBgn0002873	FBgn0004396	FBgn0003254	FBgn0002924			FBgn0029887	FBgn0026433	FBgn0025781	FBgn0010197
FBgn0002887	FBgn0004435	FBgn0003257	FBgn0002932			FBgn0029895	FBgn0026563	FBgn0025839	FBgn0010215
FBgn0002891	FBgn0004449	FBgn0003274	FBgn0002945			FBgn0029896	FBgn0026593	FBgn0025874	FBgn0010222
FBgn0002905	FBgn0004462	FBgn0003279	FBgn0002962			FBgn0029990	FBgn0026602	FBgn0026150	FBgn0010241
FBgn0002906	FBgn0004507	FBgn0003285	FBgn0003002			FBgn0030040	FBgn0026738	FBgn0026190	FBgn0010247
FBgn0002917	FBgn0004509	FBgn0003292	FBgn0003015			FBgn0030041	FBgn0026753	FBgn0026257	FBgn0010282
FBgn0002921	FBgn0004513	FBgn0003295	FBgn0003016			FBgn0030065	FBgn0027070	FBgn0026361	FBgn0010287
FBgn0002932	FBgn0004516	FBgn0003300	FBgn0003023			FBgn0030148	FBgn0027079	FBgn0026404	FBgn0010300
FBgn0002945	FBgn0004575	FBgn0003301	FBgn0003028			FBgn0030160	FBgn0027090	FBgn0026439	FBgn0010314
FBgn0002962	FBgn0004580	FBgn0003310	FBgn0003044			FBgn0030234	FBgn0027091	FBgn0026575	FBgn0010316
FBgn0002985	FBgn0004598	FBgn0003339	FBgn0003046			FBgn0030482	FBgn0027329	FBgn0026616	FBgn0010342
FBgn0003002	FBgn0004606	FBgn0003345	FBgn0003053			FBgn0030537	FBgn0027341	FBgn0026753	FBgn0010356
FBgn0003008	FBgn0004607	FBgn0003346	FBgn0003057			FBgn0030539	FBgn0027348	FBgn0026872	FBgn0010357
FBgn0003015	FBgn0004635	FBgn0003356	FBgn0003060			FBgn0030558	FBgn0027512	FBgn0027052	FBgn0010382
FBgn0003016	FBgn0004636	FBgn0003357	FBgn0003062			FBgn0030572	FBgn0027529	FBgn0027070	FBgn0010383
FBgn0003044	FBgn0004648	FBgn0003358	FBgn0003065			FBgn0030583	FBgn0027571	FBgn0027506	FBgn0010406
FBgn0003048	FBgn0004649	FBgn0003380	FBgn0003068			FBgn0030593	FBgn0027580	FBgn0027514	FBgn0010407
FBgn0003053	FBgn0004654	FBgn0003386	FBgn0003074			FBgn0030613	FBgn0027600	FBgn0027537	FBgn0010409
FBgn0003057	FBgn0004656	FBgn0003388	FBgn0003076			FBgn0030653	FBgn0027615	FBgn0027556	FBgn0010416
FBgn0003060	FBgn0004657	FBgn0003396	FBgn0003086			FBgn0030666	FBgn0027843	FBgn0027585	FBgn0010425
FBgn0003076	FBgn0004698	FBgn0003415	FBgn0003087			FBgn0030706	FBgn0028325	FBgn0027783	FBgn0010431
FBgn0003082	FBgn0004777	FBgn0003429	FBgn0003090			FBgn0030763	FBgn0028336	FBgn0027790	FBgn0010501
FBgn0003089	FBgn0004795	FBgn0003435	FBgn0003114			FBgn0030775	FBgn0028400	FBgn0027889	FBgn0010549
FBgn0003090	FBgn0004832	FBgn0003450	FBgn0003117			FBgn0030807	FBgn0028434	FBgn0027949	FBgn0010591
FBgn0003093	FBgn0004838	FBgn0003463	FBgn0003124			FBgn0030837	FBgn0028467	FBgn0028380	FBgn0010607
FBgn0003114	FBgn0004841	FBgn0003486	FBgn0003129			FBgn0030897	FBgn0028494	FBgn0028400	FBgn0010770
FBgn0003116	FBgn0004852	FBgn0003499	FBgn0003137			FBgn0030912	FBgn0028516	FBgn0028408	FBgn0011211
FBgn0003117	FBgn0004859	FBgn0003513	FBgn0003162			FBgn0030914	FBgn0028540	FBgn0028471	FBgn0011227
FBgn0003118	FBgn0004872	FBgn0003515	FBgn0003165			FBgn0030976	FBgn0028646	FBgn0028476	FBgn0011236
FBgn0003137	FBgn0004875	FBgn0003517	FBgn0003174			FBgn0030999	FBgn0028670	FBgn0028526	FBgn0011260
FBgn0003139	FBgn0004878	FBgn0003525	FBgn0003187			FBgn0031000	FBgn0028700	FBgn0028532	FBgn0011327
FBgn0003145	FBgn0004880	FBgn0003527	FBgn0003204			FBgn0031011	FBgn0028743	FBgn0028534	FBgn0011554
FBgn0003149	FBgn0004882	FBgn0003607	FBgn0003210			FBgn0031064	FBgn0028916	FBgn0028544	FBgn0011556
FBgn0003159	FBgn0004921	FBgn0003655	FBgn0003227			FBgn0031089	FBgn0029131	FBgn0028573	FBgn0011581
FBgn0003165	FBgn0004924	FBgn0003683	FBgn0003231			FBgn0031097	FBgn0029155	FBgn0028646	FBgn0011584
FBgn0003175	FBgn0005198	FBgn0003701	FBgn0003254			FBgn0031249	FBgn0029167	FBgn0028699	FBgn0011586
FBgn0003189	FBgn0005390	FBgn0003710	FBgn0003257			FBgn0031258	FBgn0029174	FBgn0028700	FBgn0011589
FBgn0003209	FBgn0005561	FBgn0003733	FBgn0003268			FBgn0031306	FBgn0029648	FBgn0028708	FBgn0011592
FBgn0003227	FBgn0005564	FBgn0003862	FBgn0003274			FBgn0031307	FBgn0029706	FBgn0028743	FBgn0011603
FBgn0003254	FBgn0005586	FBgn0003863	FBgn0003275			FBgn0031344	FBgn0029733	FBgn0028920	FBgn0011604
FBgn0003268	FBgn0005592	FBgn0003866	FBgn0003277			FBgn0031393	FBgn0029801	FBgn0028938	FBgn0011638
FBgn0003270	FBgn0005630	FBgn0003870	FBgn0003278			FBgn0031424	FBgn0029823	FBgn0028950	FBgn0011648
FBgn0003274	FBgn0005631	FBgn0003887	FBgn0003285			FBgn0031561	FBgn0029849	FBgn0028956	FBgn0011674
FBgn0003275	FBgn0005632	FBgn0003890	FBgn0003292			FBgn0031571	FBgn0029866	FBgn0029092	FBgn0011676
FBgn0003277	FBgn0005640	FBgn0003891	FBgn0003310			FBgn0031621	FBgn0029879	FBgn0029093	FBgn0011710
FBgn0003278	FBgn0005648	FBgn0003892	FBgn0003317			FBgn0031629	FBgn0029881	FBgn0029152	FBgn0011715
FBgn0003285	FBgn0005649	FBgn0003896	FBgn0003319			FBgn0031645	FBgn0029894	FBgn0029155	FBgn0011737
FBgn0003300	FBgn0005666	FBgn0003942	FBgn0003346			FBgn0031718	FBgn0029915	FBgn0029167	FBgn0011761
FBgn0003301	FBgn0005670	FBgn0003944	FBgn0003356			FBgn0031719	FBgn0029930	FBgn0029170	FBgn0011770
FBgn0003302	FBgn0005677	FBgn0003950	FBgn0003357			FBgn0031737	FBgn0029942	FBgn0029173	FBgn0011785
FBgn0003308	FBgn0005694	FBgn0003984	FBgn0003358			FBgn0031835	FBgn0029969	FBgn0029639	FBgn0011802
FBgn0003326	FBgn0005775	FBgn0003997	FBgn0003360			FBgn0031850	FBgn0030008	FBgn0029648	FBgn0011817
FBgn0003328	FBgn0010019	FBgn0004009	FBgn0003371			FBgn0031908	FBgn0030012	FBgn0029649	FBgn0011824
FBgn0003330	FBgn0010039	FBgn0004034	FBgn0003382			FBgn0031913	FBgn0030013	FBgn0029685	FBgn0012034
FBgn0003339	FBgn0010097	FBgn0004102	FBgn0003388			FBgn0031942	FBgn0030025	FBgn0029716	FBgn0012036
FBgn0003345	FBgn0010113	FBgn0004118	FBgn0003391			FBgn0031948	FBgn0030039	FBgn0029811	FBgn0012344
FBgn0003356	FBgn0010213	FBgn0004168	FBgn0003396			FBgn0032006	FBgn0030056	FBgn0029824	FBgn0013278
FBgn0003357	FBgn0010215	FBgn0004169	FBgn0003401			FBgn0032010	FBgn0030058	FBgn0029827	FBgn0013307
FBgn0003358	FBgn0010222	FBgn0004170	FBgn0003410			FBgn0032075	FBgn0030085	FBgn0029836	FBgn0013686
FBgn0003386	FBgn0010228	FBgn0004198	FBgn0003411			FBgn0032136	FBgn0030086	FBgn0029848	FBgn0013718
FBgn0003391	FBgn0010235	FBgn0004228	FBgn0003415			FBgn0032144	FBgn0030089	FBgn0029851	FBgn0013726
FBgn0003396	FBgn0010241	FBgn0004242	FBgn0003416			FBgn0032151	FBgn0030178	FBgn0029891	FBgn0013732
FBgn0003401	FBgn0010246	FBgn0004244	FBgn0003423			FBgn0032156	FBgn0030276	FBgn0029896	FBgn0013746
FBgn0003410	FBgn0010247	FBgn0004364	FBgn0003430			FBgn0032224	FBgn0030305	FBgn0029898	FBgn0013753
FBgn0003415	FBgn0010300	FBgn0004369	FBgn0003435			FBgn0032283	FBgn0030345	FBgn0029930	FBgn0013756
FBgn0003416	FBgn0010313	FBgn0004378	FBgn0003444			FBgn0032304	FBgn0030373	FBgn0029941	FBgn0013764
FBgn0003429	FBgn0010315	FBgn0004389	FBgn0003447			FBgn0032361	FBgn0030396	FBgn0029944	FBgn0013770
FBgn0003430	FBgn0010317	FBgn0004396	FBgn0003448			FBgn0032397	FBgn0030412	FBgn0029969	FBgn0013773
FBgn0003435	FBgn0010340	FBgn0004400	FBgn0003459			FBgn0032401	FBgn0030431	FBgn0029970	FBgn0013949
FBgn0003444	FBgn0010350	FBgn0004403	FBgn0003462			FBgn0032422	FBgn0030478	FBgn0029990	FBgn0013983
FBgn0003448	FBgn0010357	FBgn0004404	FBgn0003475			FBgn0032538	FBgn0030481	FBgn0029996	FBgn0014019
FBgn0003449	FBgn0010387	FBgn0004428	FBgn0003486			FBgn0032600	FBgn0030499	FBgn0029997	FBgn0014028
FBgn0003450	FBgn0010391	FBgn0004435	FBgn0003502			FBgn0032685	FBgn0030512	FBgn0030049	FBgn0014029
FBgn0003462	FBgn0010397	FBgn0004449	FBgn0003507			FBgn0032694	FBgn0030608	FBgn0030085	FBgn0014141
FBgn0003463	FBgn0010398	FBgn0004456	FBgn0003520			FBgn0032773	FBgn0030612	FBgn0030098	FBgn0014184
FBgn0003475	FBgn0010399	FBgn0004507	FBgn0003525			FBgn0032774	FBgn0030638	FBgn0030102	FBgn0014189
FBgn0003479	FBgn0010415	FBgn0004511	FBgn0003527			FBgn0032775	FBgn0030653	FBgn0030141	FBgn0014269
FBgn0003480	FBgn0010423	FBgn0004513	FBgn0003545			FBgn0032781	FBgn0030686	FBgn0030148	FBgn0014340
FBgn0003482	FBgn0010424	FBgn0004516	FBgn0003567			FBgn0032793	FBgn0030695	FBgn0030158	FBgn0014342
FBgn0003483	FBgn0010425	FBgn0004554	FBgn0003575			FBgn0032797	FBgn0030740	FBgn0030161	FBgn0014368
FBgn0003486	FBgn0010431	FBgn0004573	FBgn0003598			FBgn0032864	FBgn0030745	FBgn0030187	FBgn0014417
FBgn0003507	FBgn0010435	FBgn0004575	FBgn0003612			FBgn0032891	FBgn0030757	FBgn0030228	FBgn0014455
FBgn0003512	FBgn0010453	FBgn0004580	FBgn0003651			FBgn0032899	FBgn0030794	FBgn0030244	FBgn0014877
FBgn0003517	FBgn0010482	FBgn0004583	FBgn0003655			FBgn0032910	FBgn0030797	FBgn0030251	FBgn0014879
FBgn0003520	FBgn0010497	FBgn0004587	FBgn0003656			FBgn0033000	FBgn0030805	FBgn0030301	FBgn0014906
FBgn0003525	FBgn0010531	FBgn0004595	FBgn0003676			FBgn0033033	FBgn0030817	FBgn0030304	FBgn0014931
FBgn0003575	FBgn0010551	FBgn0004606	FBgn0003701			FBgn0033060	FBgn0030883	FBgn0030309	FBgn0015001
FBgn0003598	FBgn0010575	FBgn0004607	FBgn0003714			FBgn0033128	FBgn0030914	FBgn0030340	FBgn0015011
FBgn0003607	FBgn0010591	FBgn0004635	FBgn0003716			FBgn0033188	FBgn0030915	FBgn0030362	FBgn0015288
FBgn0003651	FBgn0010611	FBgn0004647	FBgn0003719			FBgn0033192	FBgn0030932	FBgn0030373	FBgn0015320
FBgn0003654	FBgn0010621	FBgn0004649	FBgn0003721			FBgn0033250	FBgn0030964	FBgn0030390	FBgn0015380
FBgn0003656	FBgn0010786	FBgn0004650	FBgn0003732			FBgn0033268	FBgn0031011	FBgn0030432	FBgn0015391
FBgn0003660	FBgn0010812	FBgn0004652	FBgn0003733			FBgn0033294	FBgn0031051	FBgn0030433	FBgn0015393
FBgn0003676	FBgn0010825	FBgn0004666	FBgn0003741			FBgn0033446	FBgn0031094	FBgn0030481	FBgn0015509
FBgn0003683	FBgn0010905	FBgn0004698	FBgn0003748			FBgn0033448	FBgn0031126	FBgn0030486	FBgn0015519
FBgn0003701	FBgn0010909	FBgn0004777	FBgn0003863			FBgn0033484	FBgn0031143	FBgn0030501	FBgn0015543
FBgn0003714	FBgn0011206	FBgn0004779	FBgn0003870			FBgn0033504	FBgn0031182	FBgn0030507	FBgn0015550
FBgn0003719	FBgn0011227	FBgn0004780	FBgn0003886			FBgn0033679	FBgn0031188	FBgn0030520	FBgn0015572
FBgn0003720	FBgn0011230	FBgn0004782	FBgn0003888			FBgn0033782	FBgn0031227	FBgn0030539	FBgn0015577
FBgn0003731	FBgn0011236	FBgn0004783	FBgn0003890			FBgn0033787	FBgn0031231	FBgn0030540	FBgn0015591
FBgn0003732	FBgn0011259	FBgn0004795	FBgn0003891			FBgn0033788	FBgn0031255	FBgn0030543	FBgn0015602
FBgn0003733	FBgn0011260	FBgn0004797	FBgn0003892			FBgn0033872	FBgn0031267	FBgn0030558	FBgn0015625
FBgn0003742	FBgn0011274	FBgn0004838	FBgn0003896			FBgn0033876	FBgn0031294	FBgn0030588	FBgn0015664
FBgn0003862	FBgn0011283	FBgn0004852	FBgn0003900			FBgn0033879	FBgn0031312	FBgn0030607	FBgn0015714
FBgn0003863	FBgn0011296	FBgn0004854	FBgn0003963			FBgn0033903	FBgn0031313	FBgn0030611	FBgn0015793
FBgn0003865	FBgn0011361	FBgn0004856	FBgn0003975			FBgn0033913	FBgn0031378	FBgn0030612	FBgn0015805
FBgn0003866	FBgn0011481	FBgn0004859	FBgn0003977			FBgn0033919	FBgn0031381	FBgn0030615	FBgn0015926
FBgn0003886	FBgn0011555	FBgn0004860	FBgn0003984			FBgn0033926	FBgn0031384	FBgn0030631	FBgn0016013
FBgn0003888	FBgn0011556	FBgn0004861	FBgn0003997			FBgn0033958	FBgn0031449	FBgn0030668	FBgn0016031
FBgn0003890	FBgn0011566	FBgn0004865	FBgn0004003			FBgn0033968	FBgn0031464	FBgn0030774	FBgn0016032
FBgn0003891	FBgn0011586	FBgn0004878	FBgn0004009			FBgn0033994	FBgn0031483	FBgn0030775	FBgn0016034
FBgn0003892	FBgn0011591	FBgn0004880	FBgn0004034			FBgn0034010	FBgn0031497	FBgn0030776	FBgn0016041
FBgn0003896	FBgn0011603	FBgn0004889	FBgn0004049			FBgn0034011	FBgn0031534	FBgn0030803	FBgn0016053
FBgn0003900	FBgn0011638	FBgn0004893	FBgn0004055			FBgn0034070	FBgn0031535	FBgn0030812	FBgn0016054
FBgn0003920	FBgn0011642	FBgn0004895	FBgn0004057			FBgn0034075	FBgn0031589	FBgn0030817	FBgn0016070
FBgn0003922	FBgn0011648	FBgn0004915	FBgn0004087			FBgn0034126	FBgn0031629	FBgn0030824	FBgn0016076
FBgn0003934	FBgn0011653	FBgn0004924	FBgn0004102			FBgn0034194	FBgn0031637	FBgn0030828	FBgn0016119
FBgn0003942	FBgn0011666	FBgn0005355	FBgn0004106			FBgn0034253	FBgn0031653	FBgn0030832	FBgn0016120
FBgn0003943	FBgn0011722	FBgn0005390	FBgn0004107			FBgn0034288	FBgn0031659	FBgn0030836	FBgn0016123
FBgn0003944	FBgn0011723	FBgn0005411	FBgn0004108			FBgn0034289	FBgn0031677	FBgn0030837	FBgn0016672
FBgn0003963	FBgn0011737	FBgn0005427	FBgn0004110			FBgn0034292	FBgn0031678	FBgn0030929	FBgn0016684
FBgn0003977	FBgn0011745	FBgn0005533	FBgn0004118			FBgn0034295	FBgn0031696	FBgn0030968	FBgn0016715
FBgn0003984	FBgn0011747	FBgn0005558	FBgn0004197			FBgn0034312	FBgn0031703	FBgn0030976	FBgn0016926
FBgn0003997	FBgn0011760	FBgn0005561	FBgn0004228			FBgn0034394	FBgn0031713	FBgn0030980	FBgn0016930
FBgn0004009	FBgn0011761	FBgn0005586	FBgn0004244			FBgn0034406	FBgn0031733	FBgn0030981	FBgn0016983
FBgn0004028	FBgn0011766	FBgn0005631	FBgn0004362			FBgn0034436	FBgn0031824	FBgn0031000	FBgn0017448
FBgn0004049	FBgn0011768	FBgn0005632	FBgn0004363			FBgn0034476	FBgn0031849	FBgn0031011	FBgn0017457
FBgn0004050	FBgn0011774	FBgn0005636	FBgn0004364			FBgn0034497	FBgn0031908	FBgn0031052	FBgn0019886
FBgn0004052	FBgn0011785	FBgn0005638	FBgn0004369			FBgn0034612	FBgn0031935	FBgn0031097	FBgn0019938
FBgn0004053	FBgn0011787	FBgn0005648	FBgn0004370			FBgn0034662	FBgn0031959	FBgn0031277	FBgn0019940
FBgn0004066	FBgn0011802	FBgn0005666	FBgn0004373			FBgn0034709	FBgn0031968	FBgn0031381	FBgn0019947
FBgn0004087	FBgn0011817	FBgn0005670	FBgn0004374			FBgn0034718	FBgn0031971	FBgn0031398	FBgn0019949
FBgn0004102	FBgn0011826	FBgn0005677	FBgn0004378			FBgn0034723	FBgn0032013	FBgn0031434	FBgn0019972
FBgn0004108	FBgn0011837	FBgn0005771	FBgn0004379			FBgn0034729	FBgn0032026	FBgn0031467	FBgn0019982
FBgn0004117	FBgn0012034	FBgn0005775	FBgn0004390			FBgn0034797	FBgn0032029	FBgn0031498	FBgn0020224
FBgn0004132	FBgn0012036	FBgn0010015	FBgn0004391			FBgn0034819	FBgn0032033	FBgn0031517	FBgn0020236
FBgn0004167	FBgn0013276	FBgn0010038	FBgn0004394			FBgn0034828	FBgn0032082	FBgn0031519	FBgn0020248
FBgn0004168	FBgn0013307	FBgn0010039	FBgn0004395			FBgn0034885	FBgn0032084	FBgn0031542	FBgn0020258
FBgn0004169	FBgn0013342	FBgn0010041	FBgn0004396			FBgn0034920	FBgn0032194	FBgn0031561	FBgn0020300
FBgn0004183	FBgn0013343	FBgn0010053	FBgn0004400			FBgn0035006	FBgn0032195	FBgn0031562	FBgn0020372
FBgn0004185	FBgn0013467	FBgn0010097	FBgn0004401			FBgn0035089	FBgn0032224	FBgn0031580	FBgn0020388
FBgn0004192	FBgn0013531	FBgn0010226	FBgn0004404			FBgn0035091	FBgn0032246	FBgn0031597	FBgn0020389
FBgn0004198	FBgn0013548	FBgn0010241	FBgn0004419			FBgn0035092	FBgn0032343	FBgn0031619	FBgn0020391
FBgn0004227	FBgn0013718	FBgn0010246	FBgn0004425			FBgn0035113	FBgn0032350	FBgn0031629	FBgn0020412
FBgn0004242	FBgn0013732	FBgn0010263	FBgn0004428			FBgn0035153	FBgn0032374	FBgn0031646	FBgn0020443
FBgn0004362	FBgn0013750	FBgn0010280	FBgn0004429			FBgn0035246	FBgn0032400	FBgn0031653	FBgn0020545
FBgn0004363	FBgn0013751	FBgn0010282	FBgn0004430			FBgn0035398	FBgn0032407	FBgn0031689	FBgn0020633
FBgn0004364	FBgn0013755	FBgn0010287	FBgn0004449			FBgn0035495	FBgn0032433	FBgn0031692	FBgn0020637
FBgn0004367	FBgn0013756	FBgn0010313	FBgn0004465			FBgn0035538	FBgn0032453	FBgn0031703	FBgn0020653
FBgn0004368	FBgn0013772	FBgn0010316	FBgn0004509			FBgn0035542	FBgn0032457	FBgn0031734	FBgn0021750
FBgn0004369	FBgn0013799	FBgn0010329	FBgn0004511			FBgn0035544	FBgn0032485	FBgn0031737	FBgn0021764
FBgn0004370	FBgn0013812	FBgn0010342	FBgn0004512			FBgn0035551	FBgn0032671	FBgn0031739	FBgn0021776
FBgn0004373	FBgn0013949	FBgn0010355	FBgn0004513			FBgn0035569	FBgn0032693	FBgn0031741	FBgn0021874
FBgn0004378	FBgn0013984	FBgn0010357	FBgn0004514			FBgn0035570	FBgn0032721	FBgn0031759	FBgn0022160
FBgn0004389	FBgn0013995	FBgn0010379	FBgn0004552			FBgn0035572	FBgn0032727	FBgn0031799	FBgn0022288
FBgn0004390	FBgn0013997	FBgn0010382	FBgn0004567			FBgn0035611	FBgn0032783	FBgn0031805	FBgn0022338
FBgn0004391	FBgn0014023	FBgn0010395	FBgn0004577			FBgn0035642	FBgn0032864	FBgn0031886	FBgn0022343
FBgn0004394	FBgn0014031	FBgn0010399	FBgn0004580			FBgn0035667	FBgn0032891	FBgn0031895	FBgn0022699
FBgn0004396	FBgn0014033	FBgn0010406	FBgn0004583			FBgn0035670	FBgn0032910	FBgn0031896	FBgn0022893
FBgn0004401	FBgn0014037	FBgn0010408	FBgn0004584			FBgn0035710	FBgn0032943	FBgn0031918	FBgn0022981
FBgn0004403	FBgn0014135	FBgn0010411	FBgn0004595			FBgn0035770	FBgn0033000	FBgn0031929	FBgn0022987
FBgn0004404	FBgn0014163	FBgn0010415	FBgn0004598			FBgn0035781	FBgn0033033	FBgn0031930	FBgn0023000
FBgn0004432	FBgn0014184	FBgn0010417	FBgn0004606			FBgn0035798	FBgn0033075	FBgn0031935	FBgn0023167
FBgn0004435	FBgn0014340	FBgn0010424	FBgn0004607			FBgn0035813	FBgn0033101	FBgn0031942	FBgn0023177
FBgn0004449	FBgn0014388	FBgn0010425	FBgn0004623			FBgn0035824	FBgn0033127	FBgn0031957	FBgn0023197
FBgn0004456	FBgn0014411	FBgn0010431	FBgn0004646			FBgn0035833	FBgn0033188	FBgn0031959	FBgn0023214
FBgn0004465	FBgn0014427	FBgn0010452	FBgn0004647			FBgn0036024	FBgn0033268	FBgn0031996	FBgn0023216
FBgn0004510	FBgn0014455	FBgn0010453	FBgn0004649			FBgn0036106	FBgn0033273	FBgn0032002	FBgn0023395
FBgn0004512	FBgn0014863	FBgn0010473	FBgn0004652			FBgn0036131	FBgn0033342	FBgn0032021	FBgn0023407
FBgn0004513	FBgn0014877	FBgn0010482	FBgn0004654			FBgn0036199	FBgn0033374	FBgn0032025	FBgn0023477
FBgn0004516	FBgn0014931	FBgn0010497	FBgn0004655			FBgn0036262	FBgn0033457	FBgn0032048	FBgn0023496
FBgn0004567	FBgn0015000	FBgn0010516	FBgn0004656			FBgn0036294	FBgn0033465	FBgn0032068	FBgn0023507
FBgn0004575	FBgn0015019	FBgn0010548	FBgn0004657			FBgn0036300	FBgn0033501	FBgn0032075	FBgn0023515
FBgn0004580	FBgn0015024	FBgn0010549	FBgn0004666			FBgn0036330	FBgn0033538	FBgn0032076	FBgn0023537
FBgn0004583	FBgn0015032	FBgn0010602	FBgn0004698			FBgn0036331	FBgn0033635	FBgn0032085	FBgn0023540
FBgn0004595	FBgn0015239	FBgn0010611	FBgn0004778			FBgn0036362	FBgn0033639	FBgn0032088	FBgn0023542
FBgn0004606	FBgn0015240	FBgn0010750	FBgn0004781			FBgn0036368	FBgn0033668	FBgn0032105	FBgn0024227
FBgn0004607	FBgn0015245	FBgn0011206	FBgn0004782			FBgn0036369	FBgn0033686	FBgn0032144	FBgn0024232
FBgn0004635	FBgn0015286	FBgn0011227	FBgn0004795			FBgn0036381	FBgn0033687	FBgn0032189	FBgn0024245
FBgn0004646	FBgn0015299	FBgn0011259	FBgn0004837			FBgn0036393	FBgn0033698	FBgn0032224	FBgn0024285
FBgn0004647	FBgn0015316	FBgn0011272	FBgn0004838			FBgn0036422	FBgn0033717	FBgn0032243	FBgn0024294
FBgn0004648	FBgn0015338	FBgn0011274	FBgn0004839			FBgn0036465	FBgn0033748	FBgn0032250	FBgn0024315
FBgn0004649	FBgn0015359	FBgn0011284	FBgn0004859			FBgn0036467	FBgn0033761	FBgn0032262	FBgn0024364
FBgn0004650	FBgn0015391	FBgn0011288	FBgn0004860			FBgn0036468	FBgn0033773	FBgn0032281	FBgn0024510
FBgn0004652	FBgn0015393	FBgn0011296	FBgn0004861			FBgn0036469	FBgn0033845	FBgn0032282	FBgn0024542
FBgn0004654	FBgn0015477	FBgn0011300	FBgn0004864			FBgn0036502	FBgn0033860	FBgn0032295	FBgn0024558
FBgn0004655	FBgn0015522	FBgn0011327	FBgn0004865			FBgn0036544	FBgn0033874	FBgn0032299	FBgn0024689
FBgn0004656	FBgn0015582	FBgn0011474	FBgn0004878			FBgn0036545	FBgn0033879	FBgn0032322	FBgn0024732
FBgn0004657	FBgn0015609	FBgn0011554	FBgn0004880			FBgn0036612	FBgn0033903	FBgn0032343	FBgn0024833
FBgn0004687	FBgn0015614	FBgn0011555	FBgn0004882			FBgn0036620	FBgn0033913	FBgn0032373	FBgn0024897
FBgn0004698	FBgn0015766	FBgn0011556	FBgn0004888			FBgn0036648	FBgn0033917	FBgn0032405	FBgn0024984
FBgn0004797	FBgn0015774	FBgn0011581	FBgn0004892			FBgn0036663	FBgn0033928	FBgn0032422	FBgn0024995
FBgn0004811	FBgn0015777	FBgn0011582	FBgn0004901			FBgn0036714	FBgn0033979	FBgn0032453	FBgn0024997
FBgn0004832	FBgn0015778	FBgn0011586	FBgn0004908			FBgn0036749	FBgn0034021	FBgn0032457	FBgn0025117
FBgn0004837	FBgn0015781	FBgn0011589	FBgn0004924			FBgn0036752	FBgn0034067	FBgn0032475	FBgn0025186
FBgn0004839	FBgn0015794	FBgn0011648	FBgn0004926			FBgn0036810	FBgn0034098	FBgn0032495	FBgn0025373
FBgn0004852	FBgn0015806	FBgn0011653	FBgn0004956			FBgn0036814	FBgn0034140	FBgn0032538	FBgn0025388
FBgn0004859	FBgn0015808	FBgn0011656	FBgn0004959			FBgn0036816	FBgn0034187	FBgn0032598	FBgn0025390
FBgn0004860	FBgn0015872	FBgn0011661	FBgn0005386			FBgn0036826	FBgn0034312	FBgn0032635	FBgn0025454
FBgn0004861	FBgn0015903	FBgn0011666	FBgn0005390			FBgn0036843	FBgn0034365	FBgn0032669	FBgn0025457
FBgn0004864	FBgn0015926	FBgn0011676	FBgn0005533			FBgn0036862	FBgn0034389	FBgn0032685	FBgn0025463
FBgn0004867	FBgn0016013	FBgn0011695	FBgn0005536			FBgn0036875	FBgn0034401	FBgn0032721	FBgn0025574
FBgn0004868	FBgn0016032	FBgn0011706	FBgn0005596			FBgn0036906	FBgn0034405	FBgn0032723	FBgn0025583
FBgn0004875	FBgn0016034	FBgn0011710	FBgn0005612			FBgn0036945	FBgn0034406	FBgn0032748	FBgn0025627
FBgn0004878	FBgn0016038	FBgn0011715	FBgn0005614			FBgn0036949	FBgn0034568	FBgn0032752	FBgn0025635
FBgn0004880	FBgn0016053	FBgn0011737	FBgn0005617			FBgn0037057	FBgn0034628	FBgn0032773	FBgn0025637
FBgn0004885	FBgn0016054	FBgn0011761	FBgn0005626			FBgn0037065	FBgn0034629	FBgn0032783	FBgn0025641
FBgn0004888	FBgn0016070	FBgn0011764	FBgn0005630			FBgn0037085	FBgn0034688	FBgn0032793	FBgn0025643
FBgn0004893	FBgn0016075	FBgn0011766	FBgn0005631			FBgn0037146	FBgn0034729	FBgn0032797	FBgn0025682
FBgn0004901	FBgn0016081	FBgn0011785	FBgn0005638			FBgn0037179	FBgn0034804	FBgn0032824	FBgn0025739
FBgn0004908	FBgn0016123	FBgn0011817	FBgn0005649			FBgn0037181	FBgn0034808	FBgn0032864	FBgn0025743
FBgn0004915	FBgn0016650	FBgn0011818	FBgn0005655			FBgn0037186	FBgn0034829	FBgn0032876	FBgn0025777
FBgn0004919	FBgn0016694	FBgn0011822	FBgn0005660			FBgn0037204	FBgn0034858	FBgn0032891	FBgn0025781
FBgn0004956	FBgn0016762	FBgn0011837	FBgn0005664			FBgn0037447	FBgn0034918	FBgn0032913	FBgn0025809
FBgn0004957	FBgn0016917	FBgn0012036	FBgn0005666			FBgn0037513	FBgn0034919	FBgn0033000	FBgn0025815
FBgn0005198	FBgn0016930	FBgn0012344	FBgn0005683			FBgn0037521	FBgn0034924	FBgn0033033	FBgn0025833
FBgn0005386	FBgn0016970	FBgn0013276	FBgn0005695			FBgn0037548	FBgn0034951	FBgn0033047	FBgn0025837
FBgn0005411	FBgn0016977	FBgn0013277	FBgn0008646			FBgn0037552	FBgn0034999	FBgn0033128	FBgn0025865
FBgn0005533	FBgn0017418	FBgn0013278	FBgn0008651			FBgn0037565	FBgn0035033	FBgn0033138	FBgn0025874
FBgn0005536	FBgn0017429	FBgn0013307	FBgn0010014			FBgn0037580	FBgn0035039	FBgn0033158	FBgn0025878
FBgn0005561	FBgn0017430	FBgn0013325	FBgn0010041			FBgn0037617	FBgn0035083	FBgn0033221	FBgn0025885
FBgn0005564	FBgn0017448	FBgn0013334	FBgn0010042			FBgn0037645	FBgn0035169	FBgn0033233	FBgn0026077
FBgn0005586	FBgn0017558	FBgn0013342	FBgn0010043			FBgn0037801	FBgn0035203	FBgn0033307	FBgn0026080
FBgn0005593	FBgn0017561	FBgn0013343	FBgn0010051			FBgn0037831	FBgn0035266	FBgn0033365	FBgn0026192
FBgn0005612	FBgn0017581	FBgn0013467	FBgn0010053			FBgn0037842	FBgn0035268	FBgn0033448	FBgn0026196
FBgn0005616	FBgn0019650	FBgn0013469	FBgn0010078			FBgn0037884	FBgn0035308	FBgn0033453	FBgn0026207
FBgn0005617	FBgn0019662	FBgn0013672	FBgn0010097			FBgn0037902	FBgn0035348	FBgn0033464	FBgn0026238
FBgn0005624	FBgn0019982	FBgn0013675	FBgn0010105			FBgn0037943	FBgn0035438	FBgn0033475	FBgn0026252
FBgn0005626	FBgn0019990	FBgn0013686	FBgn0010113			FBgn0037996	FBgn0035449	FBgn0033484	FBgn0026257
FBgn0005630	FBgn0020224	FBgn0013746	FBgn0010198			FBgn0038098	FBgn0035475	FBgn0033538	FBgn0026261
FBgn0005631	FBgn0020248	FBgn0013751	FBgn0010213			FBgn0038115	FBgn0035551	FBgn0033590	FBgn0026319
FBgn0005632	FBgn0020269	FBgn0013763	FBgn0010215			FBgn0038126	FBgn0035572	FBgn0033591	FBgn0026320
FBgn0005636	FBgn0020272	FBgn0013764	FBgn0010217			FBgn0038136	FBgn0035588	FBgn0033600	FBgn0026361
FBgn0005666	FBgn0020306	FBgn0013772	FBgn0010222			FBgn0038148	FBgn0035610	FBgn0033607	FBgn0026371
FBgn0005671	FBgn0020378	FBgn0013773	FBgn0010223			FBgn0038181	FBgn0035638	FBgn0033653	FBgn0026372
FBgn0005674	FBgn0020386	FBgn0013949	FBgn0010228			FBgn0038190	FBgn0035641	FBgn0033658	FBgn0026404
FBgn0005677	FBgn0020392	FBgn0013973	FBgn0010241			FBgn0038277	FBgn0035642	FBgn0033659	FBgn0026409
FBgn0005771	FBgn0020412	FBgn0013981	FBgn0010247			FBgn0038296	FBgn0035756	FBgn0033668	FBgn0026431
FBgn0005775	FBgn0020414	FBgn0013984	FBgn0010282			FBgn0038321	FBgn0035760	FBgn0033679	FBgn0026432
FBgn0010019	FBgn0020415	FBgn0014000	FBgn0010288			FBgn0038341	FBgn0035770	FBgn0033720	FBgn0026565
FBgn0010039	FBgn0020416	FBgn0014011	FBgn0010292			FBgn0038353	FBgn0035831	FBgn0033724	FBgn0026575
FBgn0010041	FBgn0020445	FBgn0014026	FBgn0010300			FBgn0038407	FBgn0035861	FBgn0033729	FBgn0026598
FBgn0010051	FBgn0020496	FBgn0014029	FBgn0010313			FBgn0038420	FBgn0035911	FBgn0033730	FBgn0026616
FBgn0010078	FBgn0020508	FBgn0014037	FBgn0010314			FBgn0038462	FBgn0035917	FBgn0033740	FBgn0026666
FBgn0010100	FBgn0020513	FBgn0014073	FBgn0010315			FBgn0038566	FBgn0035936	FBgn0033744	FBgn0026702
FBgn0010105	FBgn0020620	FBgn0014092	FBgn0010316			FBgn0038613	FBgn0035942	FBgn0033752	FBgn0026721
FBgn0010109	FBgn0020637	FBgn0014135	FBgn0010339			FBgn0038645	FBgn0035955	FBgn0033757	FBgn0026751
FBgn0010113	FBgn0020638	FBgn0014163	FBgn0010340			FBgn0038658	FBgn0035964	FBgn0033760	FBgn0026753
FBgn0010114	FBgn0020642	FBgn0014189	FBgn0010342			FBgn0038701	FBgn0035968	FBgn0033787	FBgn0026756
FBgn0010173	FBgn0020653	FBgn0014340	FBgn0010355			FBgn0038720	FBgn0035969	FBgn0033788	FBgn0026761
FBgn0010194	FBgn0020660	FBgn0014343	FBgn0010357			FBgn0038799	FBgn0035978	FBgn0033826	FBgn0026872
FBgn0010198	FBgn0020764	FBgn0014388	FBgn0010382			FBgn0038839	FBgn0035989	FBgn0033845	FBgn0027052
FBgn0010213	FBgn0020906	FBgn0014417	FBgn0010387			FBgn0038845	FBgn0036008	FBgn0033869	FBgn0027083
FBgn0010222	FBgn0020930	FBgn0014427	FBgn0010397			FBgn0038869	FBgn0036028	FBgn0033873	FBgn0027291
FBgn0010223	FBgn0021750	FBgn0014469	FBgn0010406			FBgn0038881	FBgn0036032	FBgn0033879	FBgn0027330
FBgn0010225	FBgn0021765	FBgn0014931	FBgn0010411			FBgn0038917	FBgn0036131	FBgn0033903	FBgn0027334
FBgn0010238	FBgn0021767	FBgn0015001	FBgn0010416			FBgn0038919	FBgn0036199	FBgn0033907	FBgn0027338
FBgn0010241	FBgn0021768	FBgn0015010	FBgn0010423			FBgn0038950	FBgn0036206	FBgn0033921	FBgn0027339
FBgn0010246	FBgn0021800	FBgn0015024	FBgn0010425			FBgn0038966	FBgn0036254	FBgn0033925	FBgn0027348
FBgn0010247	FBgn0021944	FBgn0015032	FBgn0010431			FBgn0038973	FBgn0036257	FBgn0033936	FBgn0027500
FBgn0010263	FBgn0022097	FBgn0015034	FBgn0010452			FBgn0038983	FBgn0036266	FBgn0033942	FBgn0027503
FBgn0010269	FBgn0022160	FBgn0015037	FBgn0010453			FBgn0038986	FBgn0036290	FBgn0033945	FBgn0027505
FBgn0010313	FBgn0022238	FBgn0015039	FBgn0010473			FBgn0039054	FBgn0036300	FBgn0033968	FBgn0027514
FBgn0010328	FBgn0022343	FBgn0015222	FBgn0010488			FBgn0039081	FBgn0036330	FBgn0033979	FBgn0027521
FBgn0010352	FBgn0022344	FBgn0015269	FBgn0010497			FBgn0039094	FBgn0036334	FBgn0034010	FBgn0027537
FBgn0010355	FBgn0022359	FBgn0015286	FBgn0010501			FBgn0039257	FBgn0036346	FBgn0034011	FBgn0027549
FBgn0010357	FBgn0022361	FBgn0015288	FBgn0010516			FBgn0039343	FBgn0036350	FBgn0034046	FBgn0027552
FBgn0010387	FBgn0022702	FBgn0015316	FBgn0010520			FBgn0039355	FBgn0036351	FBgn0034091	FBgn0027556
FBgn0010389	FBgn0022770	FBgn0015320	FBgn0010531			FBgn0039356	FBgn0036366	FBgn0034093	FBgn0027558
FBgn0010391	FBgn0022774	FBgn0015371	FBgn0010549			FBgn0039419	FBgn0036461	FBgn0034094	FBgn0027567
FBgn0010397	FBgn0023094	FBgn0015396	FBgn0010551			FBgn0039435	FBgn0036462	FBgn0034136	FBgn0027570
FBgn0010398	FBgn0023213	FBgn0015399	FBgn0010575			FBgn0039438	FBgn0036502	FBgn0034158	FBgn0027571
FBgn0010408	FBgn0023215	FBgn0015400	FBgn0010591			FBgn0039453	FBgn0036519	FBgn0034159	FBgn0027575
FBgn0010411	FBgn0023216	FBgn0015509	FBgn0010612			FBgn0039536	FBgn0036544	FBgn0034160	FBgn0027580
FBgn0010412	FBgn0023407	FBgn0015513	FBgn0010621			FBgn0039543	FBgn0036620	FBgn0034194	FBgn0027592
FBgn0010415	FBgn0023416	FBgn0015519	FBgn0010622			FBgn0039635	FBgn0036646	FBgn0034197	FBgn0027597
FBgn0010421	FBgn0023477	FBgn0015521	FBgn0010651			FBgn0039647	FBgn0036685	FBgn0034200	FBgn0027600
FBgn0010423	FBgn0023515	FBgn0015522	FBgn0010660			FBgn0039670	FBgn0036717	FBgn0034201	FBgn0027601
FBgn0010424	FBgn0023516	FBgn0015524	FBgn0010741			FBgn0039682	FBgn0036749	FBgn0034204	FBgn0027608
FBgn0010425	FBgn0023526	FBgn0015541	FBgn0010750			FBgn0039688	FBgn0036752	FBgn0034288	FBgn0027610
FBgn0010434	FBgn0023528	FBgn0015543	FBgn0010762			FBgn0039719	FBgn0036763	FBgn0034289	FBgn0027621
FBgn0010435	FBgn0023530	FBgn0015546	FBgn0010808			FBgn0039754	FBgn0036764	FBgn0034295	FBgn0027783
FBgn0010452	FBgn0023537	FBgn0015558	FBgn0010825			FBgn0039756	FBgn0036769	FBgn0034296	FBgn0027843
FBgn0010453	FBgn0023540	FBgn0015569	FBgn0010830			FBgn0039778	FBgn0036770	FBgn0034301	FBgn0027889
FBgn0010473	FBgn0024150	FBgn0015570	FBgn0010877			FBgn0039805	FBgn0036773	FBgn0034398	FBgn0027929
FBgn0010482	FBgn0024177	FBgn0015572	FBgn0010905			FBgn0039827	FBgn0036791	FBgn0034427	FBgn0027932
FBgn0010488	FBgn0024244	FBgn0015575	FBgn0010909			FBgn0039844	FBgn0036811	FBgn0034429	FBgn0027949
FBgn0010516	FBgn0024277	FBgn0015577	FBgn0011206			FBgn0039872	FBgn0036824	FBgn0034439	FBgn0028325
FBgn0010520	FBgn0024293	FBgn0015591	FBgn0011211			FBgn0039883	FBgn0036837	FBgn0034440	FBgn0028360
FBgn0010531	FBgn0024294	FBgn0015609	FBgn0011225			FBgn0039886	FBgn0036843	FBgn0034441	FBgn0028370
FBgn0010549	FBgn0024315	FBgn0015625	FBgn0011227			FBgn0039915	FBgn0036893	FBgn0034470	FBgn0028372
FBgn0010551	FBgn0024360	FBgn0015714	FBgn0011236			FBgn0039927	FBgn0036895	FBgn0034490	FBgn0028374
FBgn0010575	FBgn0024365	FBgn0015756	FBgn0011259			FBgn0039932	FBgn0036926	FBgn0034499	FBgn0028380
FBgn0010590	FBgn0024510	FBgn0015772	FBgn0011260			FBgn0039941	FBgn0036935	FBgn0034545	FBgn0028408
FBgn0010612	FBgn0024555	FBgn0015774	FBgn0011283			FBgn0039993	FBgn0036948	FBgn0034548	FBgn0028426
FBgn0010621	FBgn0024556	FBgn0015778	FBgn0011286			FBgn0040001	FBgn0036952	FBgn0034551	FBgn0028468
FBgn0010622	FBgn0024689	FBgn0015801	FBgn0011296			FBgn0040060	FBgn0036986	FBgn0034588	FBgn0028471
FBgn0010651	FBgn0024698	FBgn0015805	FBgn0011327			FBgn0040234	FBgn0037015	FBgn0034662	FBgn0028506
FBgn0010660	FBgn0024728	FBgn0015806	FBgn0011361			FBgn0040299	FBgn0037063	FBgn0034693	FBgn0028519
FBgn0010741	FBgn0024732	FBgn0015838	FBgn0011455			FBgn0040477	FBgn0037116	FBgn0034703	FBgn0028523
FBgn0010750	FBgn0024734	FBgn0015872	FBgn0011474			FBgn0040505	FBgn0037130	FBgn0034709	FBgn0028534
FBgn0010768	FBgn0024740	FBgn0015919	FBgn0011554			FBgn0040717	FBgn0037138	FBgn0034710	FBgn0028542
FBgn0010774	FBgn0024804	FBgn0015926	FBgn0011555			FBgn0040813	FBgn0037144	FBgn0034712	FBgn0028554
FBgn0010803	FBgn0024841	FBgn0016013	FBgn0011556			FBgn0040985	FBgn0037163	FBgn0034828	FBgn0028646
FBgn0010808	FBgn0024846	FBgn0016032	FBgn0011581			FBgn0041180	FBgn0037186	FBgn0034878	FBgn0028662
FBgn0010825	FBgn0024921	FBgn0016034	FBgn0011586			FBgn0041605	FBgn0037203	FBgn0034899	FBgn0028665
FBgn0010894	FBgn0024956	FBgn0016047	FBgn0011589			FBgn0041627	FBgn0037204	FBgn0034901	FBgn0028670
FBgn0010905	FBgn0024957	FBgn0016054	FBgn0011592			FBgn0041721	FBgn0037230	FBgn0034951	FBgn0028699
FBgn0010909	FBgn0024973	FBgn0016061	FBgn0011603			FBgn0042174	FBgn0037332	FBgn0035006	FBgn0028704
FBgn0011202	FBgn0024989	FBgn0016070	FBgn0011604			FBgn0042178	FBgn0037338	FBgn0035089	FBgn0028708
FBgn0011207	FBgn0024994	FBgn0016075	FBgn0011606			FBgn0042696	FBgn0037447	FBgn0035092	FBgn0028737
FBgn0011224	FBgn0025335	FBgn0016081	FBgn0011638			FBgn0043364	FBgn0037487	FBgn0035151	FBgn0028841
FBgn0011230	FBgn0025352	FBgn0016122	FBgn0011648			FBgn0043575	FBgn0037513	FBgn0035281	FBgn0028950
FBgn0011236	FBgn0025388	FBgn0016123	FBgn0011653			FBgn0043841	FBgn0037515	FBgn0035325	FBgn0028952
FBgn0011241	FBgn0025456	FBgn0016694	FBgn0011666			FBgn0043854	FBgn0037521	FBgn0035343	FBgn0028956
FBgn0011259	FBgn0025549	FBgn0016715	FBgn0011674			FBgn0045800	FBgn0037533	FBgn0035358	FBgn0028974
FBgn0011260	FBgn0025574	FBgn0016726	FBgn0011676			FBgn0050035	FBgn0037549	FBgn0035359	FBgn0028980
FBgn0011274	FBgn0025628	FBgn0016754	FBgn0011692			FBgn0050046	FBgn0037552	FBgn0035420	FBgn0028999
FBgn0011286	FBgn0025641	FBgn0016756	FBgn0011703			FBgn0050296	FBgn0037592	FBgn0035427	FBgn0029002
FBgn0011291	FBgn0025643	FBgn0016797	FBgn0011704			FBgn0051004	FBgn0037606	FBgn0035434	FBgn0029079
FBgn0011296	FBgn0025687	FBgn0016977	FBgn0011706			FBgn0051030	FBgn0037617	FBgn0035439	FBgn0029092
FBgn0011297	FBgn0025726	FBgn0016983	FBgn0011710			FBgn0051072	FBgn0037619	FBgn0035480	FBgn0029093
FBgn0011327	FBgn0025740	FBgn0017457	FBgn0011722			FBgn0051075	FBgn0037632	FBgn0035511	FBgn0029113
FBgn0011361	FBgn0025741	FBgn0017545	FBgn0011737			FBgn0051140	FBgn0037637	FBgn0035513	FBgn0029128
FBgn0011474	FBgn0025743	FBgn0017558	FBgn0011761			FBgn0051163	FBgn0037643	FBgn0035544	FBgn0029147
FBgn0011476	FBgn0025837	FBgn0019650	FBgn0011769			FBgn0051233	FBgn0037676	FBgn0035545	FBgn0029148
FBgn0011556	FBgn0025864	FBgn0019660	FBgn0011770			FBgn0051324	FBgn0037685	FBgn0035546	FBgn0029152
FBgn0011571	FBgn0025865	FBgn0019661	FBgn0011785			FBgn0051343	FBgn0037709	FBgn0035582	FBgn0029155
FBgn0011592	FBgn0025866	FBgn0019932	FBgn0011787			FBgn0051439	FBgn0037717	FBgn0035610	FBgn0029158
FBgn0011603	FBgn0025874	FBgn0019947	FBgn0011802			FBgn0051451	FBgn0037722	FBgn0035611	FBgn0029167
FBgn0011604	FBgn0026077	FBgn0019949	FBgn0011817			FBgn0051619	FBgn0037779	FBgn0035619	FBgn0029531
FBgn0011653	FBgn0026089	FBgn0019957	FBgn0011824			FBgn0051665	FBgn0037807	FBgn0035620	FBgn0029573
FBgn0011666	FBgn0026160	FBgn0019972	FBgn0011834			FBgn0051683	FBgn0037831	FBgn0035638	FBgn0029639
FBgn0011705	FBgn0026192	FBgn0019985	FBgn0011837			FBgn0051792	FBgn0037836	FBgn0035640	FBgn0029672
FBgn0011715	FBgn0026197	FBgn0019990	FBgn0012034			FBgn0051875	FBgn0037837	FBgn0035641	FBgn0029733
FBgn0011722	FBgn0026199	FBgn0020224	FBgn0012036			FBgn0051997	FBgn0037841	FBgn0035665	FBgn0029756
FBgn0011723	FBgn0026206	FBgn0020257	FBgn0012037			FBgn0051999	FBgn0037842	FBgn0035670	FBgn0029761
FBgn0011725	FBgn0026257	FBgn0020258	FBgn0012344			FBgn0052027	FBgn0037843	FBgn0035735	FBgn0029791
FBgn0011726	FBgn0026262	FBgn0020300	FBgn0013276			FBgn0052073	FBgn0037846	FBgn0035737	FBgn0029804
FBgn0011739	FBgn0026263	FBgn0020309	FBgn0013277			FBgn0052137	FBgn0037856	FBgn0035743	FBgn0029813
FBgn0011740	FBgn0026309	FBgn0020378	FBgn0013278			FBgn0052187	FBgn0037890	FBgn0035770	FBgn0029814
FBgn0011741	FBgn0026317	FBgn0020388	FBgn0013279			FBgn0052189	FBgn0037917	FBgn0035777	FBgn0029820
FBgn0011745	FBgn0026375	FBgn0020414	FBgn0013307			FBgn0052205	FBgn0037924	FBgn0035781	FBgn0029828
FBgn0011747	FBgn0026376	FBgn0020416	FBgn0013308			FBgn0052207	FBgn0037943	FBgn0035787	FBgn0029836
FBgn0011761	FBgn0026399	FBgn0020503	FBgn0013325			FBgn0052241	FBgn0037944	FBgn0035788	FBgn0029838
FBgn0011768	FBgn0026401	FBgn0020508	FBgn0013343			FBgn0052280	FBgn0037955	FBgn0035792	FBgn0029843
FBgn0011770	FBgn0026404	FBgn0020618	FBgn0013348			FBgn0052311	FBgn0037956	FBgn0035806	FBgn0029848
FBgn0011771	FBgn0026411	FBgn0020622	FBgn0013435			FBgn0052364	FBgn0038043	FBgn0035813	FBgn0029851
FBgn0011785	FBgn0026427	FBgn0020633	FBgn0013467			FBgn0052373	FBgn0038049	FBgn0035831	FBgn0029866
FBgn0011787	FBgn0026431	FBgn0020637	FBgn0013469			FBgn0052499	FBgn0038051	FBgn0035844	FBgn0029896
FBgn0011817	FBgn0026432	FBgn0020638	FBgn0013548			FBgn0052564	FBgn0038098	FBgn0035856	FBgn0029898
FBgn0011824	FBgn0026439	FBgn0020639	FBgn0013563			FBgn0052603	FBgn0038099	FBgn0035858	FBgn0029903
FBgn0011828	FBgn0026441	FBgn0020642	FBgn0013674			FBgn0052687	FBgn0038147	FBgn0035859	FBgn0029924
FBgn0011836	FBgn0026533	FBgn0020645	FBgn0013676			FBgn0053196	FBgn0038172	FBgn0035861	FBgn0029932
FBgn0012034	FBgn0026562	FBgn0020767	FBgn0013678			FBgn0053302	FBgn0038190	FBgn0035886	FBgn0029936
FBgn0012036	FBgn0026563	FBgn0020906	FBgn0013679			FBgn0053513	FBgn0038191	FBgn0035902	FBgn0029941
FBgn0012037	FBgn0026573	FBgn0020909	FBgn0013680			FBgn0053519	FBgn0038243	FBgn0035914	FBgn0029944
FBgn0013263	FBgn0026575	FBgn0020910	FBgn0013681			FBgn0053547	FBgn0038252	FBgn0035917	FBgn0029970
FBgn0013272	FBgn0026577	FBgn0021742	FBgn0013684			FBgn0053978	FBgn0038277	FBgn0035918	FBgn0029974
FBgn0013276	FBgn0026593	FBgn0021767	FBgn0013718			FBgn0053988	FBgn0038286	FBgn0035926	FBgn0030027
FBgn0013303	FBgn0026597	FBgn0021800	FBgn0013726			FBgn0058191	FBgn0038290	FBgn0035929	FBgn0030028
FBgn0013305	FBgn0026602	FBgn0021825	FBgn0013732			FBgn0062978	FBgn0038294	FBgn0035945	FBgn0030038
FBgn0013325	FBgn0026616	FBgn0021979	FBgn0013756			FBgn0063485	FBgn0038316	FBgn0035959	FBgn0030041
FBgn0013342	FBgn0026721	FBgn0021995	FBgn0013764			FBgn0083973	FBgn0038353	FBgn0035969	FBgn0030057
FBgn0013343	FBgn0026738	FBgn0022069	FBgn0013765			FBgn0085195	FBgn0038360	FBgn0035985	FBgn0030061
FBgn0013347	FBgn0026753	FBgn0022160	FBgn0013767			FBgn0085243	FBgn0038371	FBgn0036024	FBgn0030081
FBgn0013467	FBgn0026869	FBgn0022382	FBgn0013771			FBgn0085311	FBgn0038387	FBgn0036028	FBgn0030082
FBgn0013469	FBgn0026872	FBgn0022699	FBgn0013772			FBgn0085387	FBgn0038419	FBgn0036106	FBgn0030087
FBgn0013576	FBgn0027052	FBgn0022709	FBgn0013773			FBgn0085390	FBgn0038429	FBgn0036108	FBgn0030093
FBgn0013674	FBgn0027070	FBgn0022774	FBgn0013809			FBgn0085391	FBgn0038462	FBgn0036109	FBgn0030098
FBgn0013676	FBgn0027073	FBgn0022942	FBgn0013810			FBgn0085408	FBgn0038465	FBgn0036111	FBgn0030102
FBgn0013678	FBgn0027090	FBgn0022960	FBgn0013811			FBgn0085414	FBgn0038515	FBgn0036112	FBgn0030105
FBgn0013679	FBgn0027094	FBgn0022981	FBgn0013949			FBgn0085421	FBgn0038547	FBgn0036138	FBgn0030107
FBgn0013681	FBgn0027101	FBgn0022987	FBgn0013953			FBgn0085446	FBgn0038645	FBgn0036139	FBgn0030114
FBgn0013683	FBgn0027106	FBgn0023094	FBgn0013954			FBgn0085450	FBgn0038652	FBgn0036141	FBgn0030122
FBgn0013684	FBgn0027108	FBgn0023095	FBgn0013972			FBgn0085638	FBgn0038740	FBgn0036176	FBgn0030137
FBgn0013686	FBgn0027329	FBgn0023096	FBgn0013983			FBgn0086450	FBgn0038922	FBgn0036177	FBgn0030158
FBgn0013725	FBgn0027341	FBgn0023170	FBgn0013984			FBgn0086675	FBgn0038924	FBgn0036181	FBgn0030159
FBgn0013732	FBgn0027348	FBgn0023177	FBgn0014000			FBgn0086680	FBgn0038957	FBgn0036199	FBgn0030161
FBgn0013733	FBgn0027359	FBgn0023179	FBgn0014006			FBgn0086758	FBgn0038965	FBgn0036205	FBgn0030187
FBgn0013749	FBgn0027363	FBgn0023213	FBgn0014019			FBgn0086901	FBgn0038974	FBgn0036227	FBgn0030208
FBgn0013753	FBgn0027375	FBgn0023215	FBgn0014023			FBgn0086904	FBgn0039156	FBgn0036262	FBgn0030228
FBgn0013756	FBgn0027492	FBgn0023216	FBgn0014028			FBgn0086906	FBgn0039207	FBgn0036266	FBgn0030239
FBgn0013762	FBgn0027494	FBgn0023416	FBgn0014031			FBgn0250757	FBgn0039219	FBgn0036309	FBgn0030244
FBgn0013765	FBgn0027503	FBgn0023496	FBgn0014037			FBgn0250785	FBgn0039293	FBgn0036330	FBgn0030245
FBgn0013770	FBgn0027507	FBgn0023513	FBgn0014127			FBgn0250819	FBgn0039343	FBgn0036332	FBgn0030258
FBgn0013771	FBgn0027512	FBgn0023526	FBgn0014133			FBgn0250836	FBgn0039355	FBgn0036349	FBgn0030269
FBgn0013773	FBgn0027527	FBgn0023540	FBgn0014135			FBgn0250871	FBgn0039356	FBgn0036352	FBgn0030272
FBgn0013811	FBgn0027529	FBgn0024183	FBgn0014141			FBgn0250907	FBgn0039380	FBgn0036361	FBgn0030301
FBgn0013813	FBgn0027532	FBgn0024184	FBgn0014163			FBgn0250910	FBgn0039411	FBgn0036372	FBgn0030306
FBgn0013949	FBgn0027556	FBgn0024189	FBgn0014179			FBgn0259108	FBgn0039417	FBgn0036376	FBgn0030328
FBgn0013953	FBgn0027571	FBgn0024232	FBgn0014189			FBgn0259110	FBgn0039419	FBgn0036390	FBgn0030332
FBgn0013954	FBgn0027580	FBgn0024244	FBgn0014269			FBgn0259150	FBgn0039537	FBgn0036410	FBgn0030334
FBgn0013981	FBgn0027585	FBgn0024250	FBgn0014340			FBgn0259163	FBgn0039538	FBgn0036422	FBgn0030345
FBgn0013984	FBgn0027600	FBgn0024285	FBgn0014368			FBgn0259173	FBgn0039543	FBgn0036454	FBgn0030373
FBgn0013997	FBgn0027615	FBgn0024293	FBgn0014380			FBgn0259209	FBgn0039584	FBgn0036468	FBgn0030389
FBgn0014007	FBgn0027617	FBgn0024315	FBgn0014388			FBgn0259222	FBgn0039589	FBgn0036469	FBgn0030394
FBgn0014011	FBgn0027654	FBgn0024321	FBgn0014391			FBgn0259244	FBgn0039640	FBgn0036471	FBgn0030398
FBgn0014023	FBgn0027657	FBgn0024326	FBgn0014396			FBgn0259246	FBgn0039644	FBgn0036492	FBgn0030421
FBgn0014026	FBgn0027783	FBgn0024491	FBgn0014417			FBgn0259678	FBgn0039678	FBgn0036493	FBgn0030432
FBgn0014029	FBgn0027790	FBgn0024510	FBgn0014427			FBgn0259736	FBgn0039736	FBgn0036502	FBgn0030437
FBgn0014031	FBgn0027865	FBgn0024542	FBgn0014455			FBgn0259822	FBgn0039738	FBgn0036522	FBgn0030466
FBgn0014032	FBgn0027903	FBgn0024689	FBgn0014861			FBgn0259927	FBgn0039778	FBgn0036532	FBgn0030481
FBgn0014037	FBgn0027932	FBgn0024733	FBgn0014863			FBgn0259936	FBgn0039800	FBgn0036536	FBgn0030482
FBgn0014075	FBgn0027951	FBgn0024734	FBgn0014865			FBgn0259994	FBgn0039844	FBgn0036551	FBgn0030484
FBgn0014092	FBgn0028325	FBgn0024740	FBgn0014869			FBgn0259998	FBgn0039869	FBgn0036557	FBgn0030486
FBgn0014141	FBgn0028336	FBgn0024754	FBgn0014877			FBgn0260388	FBgn0039883	FBgn0036589	FBgn0030494
FBgn0014143	FBgn0028341	FBgn0024833	FBgn0014879			FBgn0260475	FBgn0039886	FBgn0036592	FBgn0030501
FBgn0014163	FBgn0028369	FBgn0024836	FBgn0014931			FBgn0260499	FBgn0039915	FBgn0036593	FBgn0030507
FBgn0014179	FBgn0028372	FBgn0024913	FBgn0015001			FBgn0260653	FBgn0039932	FBgn0036594	FBgn0030520
FBgn0014184	FBgn0028375	FBgn0024941	FBgn0015011			FBgn0260657	FBgn0039993	FBgn0036595	FBgn0030537
FBgn0014342	FBgn0028380	FBgn0024944	FBgn0015019			FBgn0260660	FBgn0040056	FBgn0036597	FBgn0030543
FBgn0014343	FBgn0028397	FBgn0024963	FBgn0015031			FBgn0260744	FBgn0040064	FBgn0036598	FBgn0030551
FBgn0014380	FBgn0028400	FBgn0024984	FBgn0015038			FBgn0260795	FBgn0040070	FBgn0036600	FBgn0030558
FBgn0014388	FBgn0028408	FBgn0024995	FBgn0015075			FBgn0260812	FBgn0040153	FBgn0036601	FBgn0030570
FBgn0014391	FBgn0028434	FBgn0024997	FBgn0015229			FBgn0260874	FBgn0040259	FBgn0036606	FBgn0030575
FBgn0014417	FBgn0028471	FBgn0025391	FBgn0015245			FBgn0260942	FBgn0040260	FBgn0036607	FBgn0030582
FBgn0014427	FBgn0028476	FBgn0025454	FBgn0015320			FBgn0260943	FBgn0040262	FBgn0036608	FBgn0030590
FBgn0014857	FBgn0028481	FBgn0025455	FBgn0015360			FBgn0260964	FBgn0040309	FBgn0036612	FBgn0030594
FBgn0014863	FBgn0028494	FBgn0025456	FBgn0015372			FBgn0261109	FBgn0040319	FBgn0036638	FBgn0030597
FBgn0014868	FBgn0028499	FBgn0025457	FBgn0015380			FBgn0261260	FBgn0040347	FBgn0036640	FBgn0030598
FBgn0014869	FBgn0028509	FBgn0025463	FBgn0015391			FBgn0261262	FBgn0040384	FBgn0036646	FBgn0030607
FBgn0014870	FBgn0028515	FBgn0025519	FBgn0015393			FBgn0261341	FBgn0040396	FBgn0036662	FBgn0030610
FBgn0014879	FBgn0028516	FBgn0025525	FBgn0015396			FBgn0261393	FBgn0040487	FBgn0036689	FBgn0030611
FBgn0014930	FBgn0028540	FBgn0025549	FBgn0015402			FBgn0261434	FBgn0040493	FBgn0036698	FBgn0030612
FBgn0015000	FBgn0028543	FBgn0025571	FBgn0015477			FBgn0261545	FBgn0040813	FBgn0036756	FBgn0030625
FBgn0015011	FBgn0028544	FBgn0025574	FBgn0015509			FBgn0261549	FBgn0040942	FBgn0036764	FBgn0030631
FBgn0015024	FBgn0028546	FBgn0025582	FBgn0015520			FBgn0261552	FBgn0040964	FBgn0036780	FBgn0030638
FBgn0015229	FBgn0028573	FBgn0025608	FBgn0015521			FBgn0261565	FBgn0040985	FBgn0036806	FBgn0030655
FBgn0015245	FBgn0028646	FBgn0025615	FBgn0015543			FBgn0261625	FBgn0041164	FBgn0036811	FBgn0030668
FBgn0015247	FBgn0028688	FBgn0025635	FBgn0015546			FBgn0261673	FBgn0041194	FBgn0036843	FBgn0030672
FBgn0015269	FBgn0028691	FBgn0025637	FBgn0015550			FBgn0261674	FBgn0041627	FBgn0036850	FBgn0030679
FBgn0015278	FBgn0028694	FBgn0025640	FBgn0015553			FBgn0261788	FBgn0041721	FBgn0036853	FBgn0030680
FBgn0015279	FBgn0028700	FBgn0025641	FBgn0015561			FBgn0261800	FBgn0042083	FBgn0036879	FBgn0030683
FBgn0015282	FBgn0028743	FBgn0025682	FBgn0015568			FBgn0261997	FBgn0042094	FBgn0036935	FBgn0030687
FBgn0015298	FBgn0028855	FBgn0025687	FBgn0015575			FBgn0262029	FBgn0042127	FBgn0036940	FBgn0030688
FBgn0015299	FBgn0028875	FBgn0025726	FBgn0015577			FBgn0262160	FBgn0042174	FBgn0036945	FBgn0030710
FBgn0015321	FBgn0028899	FBgn0025740	FBgn0015582			FBgn0262476	FBgn0043578	FBgn0036947	FBgn0030720
FBgn0015338	FBgn0028919	FBgn0025741	FBgn0015591			FBgn0262483	FBgn0046214	FBgn0036953	FBgn0030723
FBgn0015379	FBgn0028920	FBgn0025743	FBgn0015609			FBgn0262508	FBgn0050005	FBgn0036956	FBgn0030729
FBgn0015380	FBgn0028926	FBgn0025781	FBgn0015625			FBgn0262509	FBgn0050022	FBgn0036985	FBgn0030746
FBgn0015391	FBgn0028938	FBgn0025815	FBgn0015663			FBgn0262593	FBgn0050043	FBgn0037000	FBgn0030774
FBgn0015393	FBgn0028953	FBgn0025833	FBgn0015664			FBgn0262636	FBgn0050046	FBgn0037065	FBgn0030775
FBgn0015399	FBgn0028962	FBgn0025837	FBgn0015714			FBgn0263048	FBgn0050106	FBgn0037068	FBgn0030803
FBgn0015400	FBgn0028970	FBgn0025865	FBgn0015756			FBgn0263072	FBgn0050109	FBgn0037069	FBgn0030805
FBgn0015477	FBgn0028993	FBgn0025866	FBgn0015773			FBgn0263132	FBgn0050159	FBgn0037078	FBgn0030812
FBgn0015513	FBgn0028999	FBgn0025874	FBgn0015774			FBgn0263219	FBgn0050377	FBgn0037099	FBgn0030828
FBgn0015521	FBgn0029067	FBgn0025885	FBgn0015781			FBgn0263220	FBgn0050392	FBgn0037106	FBgn0030832
FBgn0015522	FBgn0029092	FBgn0025936	FBgn0015794			FBgn0263257	FBgn0050457	FBgn0037123	FBgn0030836
FBgn0015541	FBgn0029117	FBgn0026080	FBgn0015805			FBgn0263289	FBgn0051032	FBgn0037125	FBgn0030837
FBgn0015558	FBgn0029128	FBgn0026086	FBgn0015808			FBgn0263392	FBgn0051072	FBgn0037128	FBgn0030864
FBgn0015568	FBgn0029131	FBgn0026150	FBgn0015818			FBgn0263456	FBgn0051075	FBgn0037131	FBgn0030870
FBgn0015577	FBgn0029152	FBgn0026160	FBgn0015838			FBgn0263780	FBgn0051092	FBgn0037150	FBgn0030878
FBgn0015582	FBgn0029155	FBgn0026175	FBgn0015872			FBgn0263930	FBgn0051115	FBgn0037174	FBgn0030884
FBgn0015589	FBgn0029158	FBgn0026176	FBgn0015926			FBgn0263971	FBgn0051217	FBgn0037176	FBgn0030914
FBgn0015600	FBgn0029167	FBgn0026179	FBgn0015929			FBgn0263980	FBgn0051249	FBgn0037179	FBgn0030915
FBgn0015609	FBgn0029174	FBgn0026199	FBgn0016013			FBgn0263994	FBgn0051262	FBgn0037181	FBgn0030925
FBgn0015614	FBgn0029502	FBgn0026206	FBgn0016034			FBgn0263995	FBgn0051451	FBgn0037224	FBgn0030928
FBgn0015621	FBgn0029504	FBgn0026207	FBgn0016053			FBgn0264001	FBgn0051549	FBgn0037225	FBgn0030938
FBgn0015625	FBgn0029507	FBgn0026257	FBgn0016054			FBgn0264006	FBgn0051601	FBgn0037227	FBgn0030943
FBgn0015663	FBgn0029525	FBgn0026262	FBgn0016059			FBgn0264255	FBgn0051619	FBgn0037327	FBgn0030960
FBgn0015664	FBgn0029639	FBgn0026313	FBgn0016061			FBgn0264273	FBgn0051674	FBgn0037356	FBgn0030980
FBgn0015714	FBgn0029648	FBgn0026314	FBgn0016070			FBgn0264384	FBgn0051679	FBgn0037372	FBgn0030999
FBgn0015756	FBgn0029676	FBgn0026315	FBgn0016076			FBgn0264386	FBgn0051683	FBgn0037376	FBgn0031000
FBgn0015766	FBgn0029687	FBgn0026317	FBgn0016081			FBgn0264488	FBgn0051687	FBgn0037416	FBgn0031002
FBgn0015772	FBgn0029706	FBgn0026361	FBgn0016119			FBgn0264562	FBgn0051784	FBgn0037420	FBgn0031016
FBgn0015773	FBgn0029733	FBgn0026375	FBgn0016120			FBgn0264695	FBgn0051999	FBgn0037427	FBgn0031020
FBgn0015774	FBgn0029763	FBgn0026378	FBgn0016122			FBgn0264745	FBgn0052027	FBgn0037428	FBgn0031034
FBgn0015777	FBgn0029810	FBgn0026379	FBgn0016123			FBgn0264815	FBgn0052053	FBgn0037429	FBgn0031052
FBgn0015778	FBgn0029820	FBgn0026399	FBgn0016672			FBgn0264894	FBgn0052076	FBgn0037430	FBgn0031059
FBgn0015781	FBgn0029823	FBgn0026401	FBgn0016675			FBgn0264907	FBgn0052082	FBgn0037468	FBgn0031062
FBgn0015790	FBgn0029843	FBgn0026404	FBgn0016684			FBgn0265045	FBgn0052112	FBgn0037481	FBgn0031065
FBgn0015793	FBgn0029849	FBgn0026411	FBgn0016687			FBgn0265082	FBgn0052187	FBgn0037487	FBgn0031066
FBgn0015794	FBgn0029854	FBgn0026415	FBgn0016691			FBgn0265180	FBgn0052195	FBgn0037534	FBgn0031068
FBgn0015801	FBgn0029857	FBgn0026427	FBgn0016726			FBgn0265262	FBgn0052205	FBgn0037549	FBgn0031070
FBgn0015828	FBgn0029858	FBgn0026431	FBgn0016754			FBgn0265296	FBgn0052207	FBgn0037552	FBgn0031077
FBgn0015834	FBgn0029866	FBgn0026438	FBgn0016756			FBgn0265487	FBgn0052243	FBgn0037563	FBgn0031089
FBgn0015872	FBgn0029879	FBgn0026439	FBgn0016797			FBgn0265597	FBgn0052373	FBgn0037614	FBgn0031090
FBgn0015919	FBgn0029887	FBgn0026582	FBgn0016917			FBgn0265991	FBgn0052412	FBgn0037617	FBgn0031143
FBgn0015949	FBgn0029892	FBgn0026593	FBgn0016930			FBgn0266268	FBgn0052436	FBgn0037637	FBgn0031157
FBgn0016013	FBgn0029894	FBgn0026598	FBgn0016970			FBgn0266377	FBgn0052473	FBgn0037643	FBgn0031182
FBgn0016036	FBgn0029895	FBgn0026713	FBgn0016977			FBgn0266417	FBgn0052537	FBgn0037655	FBgn0031216
FBgn0016038	FBgn0029896	FBgn0026721	FBgn0016983			FBgn0266448	FBgn0052564	FBgn0037678	FBgn0031220
FBgn0016053	FBgn0029899	FBgn0026751	FBgn0017429			FBgn0266579	FBgn0052603	FBgn0037697	FBgn0031227
FBgn0016054	FBgn0029903	FBgn0026755	FBgn0017448			FBgn0266758	FBgn0052626	FBgn0037717	FBgn0031248
FBgn0016059	FBgn0029907	FBgn0027052	FBgn0017482			FBgn0267348	FBgn0052702	FBgn0037746	FBgn0031249
FBgn0016061	FBgn0029911	FBgn0027055	FBgn0017551			FBgn0267428	FBgn0052732	FBgn0037756	FBgn0031266
FBgn0016070	FBgn0029925	FBgn0027057	FBgn0017566			FBgn0267795	FBgn0052843	FBgn0037782	FBgn0031270
FBgn0016075	FBgn0029928	FBgn0027070	FBgn0017567			FBgn0267911	FBgn0053138	FBgn0037792	FBgn0031275
FBgn0016080	FBgn0029929	FBgn0027083	FBgn0017577			FBgn0267967	FBgn0053156	FBgn0037818	FBgn0031294
FBgn0016081	FBgn0029930	FBgn0027084	FBgn0017579			FBgn0270927	FBgn0053158	FBgn0037831	FBgn0031306
FBgn0016122	FBgn0029931	FBgn0027086	FBgn0017581			FBgn0270928	FBgn0053474	FBgn0037842	FBgn0031307
FBgn0016126	FBgn0029939	FBgn0027101	FBgn0019624				FBgn0053506	FBgn0037844	FBgn0031313
FBgn0016641	FBgn0029942	FBgn0027108	FBgn0019643				FBgn0053517	FBgn0037878	FBgn0031392
FBgn0016672	FBgn0029944	FBgn0027338	FBgn0019644				FBgn0053519	FBgn0037890	FBgn0031398
FBgn0016684	FBgn0029969	FBgn0027339	FBgn0019686				FBgn0053648	FBgn0037958	FBgn0031401
FBgn0016685	FBgn0029979	FBgn0027375	FBgn0019809				FBgn0058160	FBgn0037973	FBgn0031434
FBgn0016687	FBgn0029990	FBgn0027492	FBgn0019830				FBgn0058263	FBgn0037979	FBgn0031456
FBgn0016691	FBgn0029994	FBgn0027493	FBgn0019890				FBgn0063449	FBgn0037996	FBgn0031458
FBgn0016694	FBgn0029996	FBgn0027494	FBgn0019932				FBgn0063494	FBgn0038058	FBgn0031461
FBgn0016696	FBgn0029997	FBgn0027495	FBgn0019940				FBgn0063649	FBgn0038074	FBgn0031489
FBgn0016697	FBgn0029999	FBgn0027503	FBgn0019949				FBgn0066101	FBgn0038095	FBgn0031490
FBgn0016698	FBgn0030008	FBgn0027505	FBgn0019957				FBgn0069969	FBgn0038130	FBgn0031498
FBgn0016700	FBgn0030012	FBgn0027514	FBgn0019972				FBgn0083940	FBgn0038135	FBgn0031514
FBgn0016701	FBgn0030013	FBgn0027525	FBgn0019982				FBgn0083973	FBgn0038136	FBgn0031517
FBgn0016726	FBgn0030018	FBgn0027527	FBgn0019990				FBgn0085370	FBgn0038148	FBgn0031522
FBgn0016754	FBgn0030025	FBgn0027529	FBgn0020018				FBgn0085450	FBgn0038161	FBgn0031523
FBgn0016756	FBgn0030037	FBgn0027537	FBgn0020224				FBgn0085638	FBgn0038251	FBgn0031533
FBgn0016797	FBgn0030039	FBgn0027547	FBgn0020235				FBgn0085732	FBgn0038252	FBgn0031540
FBgn0016917	FBgn0030040	FBgn0027549	FBgn0020248				FBgn0086251	FBgn0038277	FBgn0031548
FBgn0016970	FBgn0030041	FBgn0027550	FBgn0020251				FBgn0086254	FBgn0038294	FBgn0031597
FBgn0016977	FBgn0030049	FBgn0027556	FBgn0020257				FBgn0086355	FBgn0038315	FBgn0031603
FBgn0016978	FBgn0030052	FBgn0027562	FBgn0020258				FBgn0086358	FBgn0038337	FBgn0031630
FBgn0017414	FBgn0030058	FBgn0027570	FBgn0020270				FBgn0086611	FBgn0038400	FBgn0031646
FBgn0017448	FBgn0030065	FBgn0027571	FBgn0020278				FBgn0086677	FBgn0038405	FBgn0031653
FBgn0017457	FBgn0030085	FBgn0027585	FBgn0020299				FBgn0086687	FBgn0038419	FBgn0031657
FBgn0017545	FBgn0030086	FBgn0027588	FBgn0020300				FBgn0086691	FBgn0038422	FBgn0031688
FBgn0017558	FBgn0030090	FBgn0027592	FBgn0020304				FBgn0086757	FBgn0038462	FBgn0031703
FBgn0017579	FBgn0030098	FBgn0027608	FBgn0020305				FBgn0087012	FBgn0038466	FBgn0031741
FBgn0017590	FBgn0030101	FBgn0027620	FBgn0020309				FBgn0087040	FBgn0038470	FBgn0031747
FBgn0019624	FBgn0030109	FBgn0027621	FBgn0020372				FBgn0250785	FBgn0038481	FBgn0031770
FBgn0019643	FBgn0030141	FBgn0027657	FBgn0020377				FBgn0250815	FBgn0038487	FBgn0031799
FBgn0019644	FBgn0030148	FBgn0027660	FBgn0020378				FBgn0250848	FBgn0038505	FBgn0031805
FBgn0019650	FBgn0030160	FBgn0027780	FBgn0020386				FBgn0250850	FBgn0038527	FBgn0031821
FBgn0019661	FBgn0030178	FBgn0027783	FBgn0020407				FBgn0250906	FBgn0038528	FBgn0031824
FBgn0019830	FBgn0030187	FBgn0027790	FBgn0020412				FBgn0250907	FBgn0038542	FBgn0031860
FBgn0019886	FBgn0030217	FBgn0027844	FBgn0020496				FBgn0259216	FBgn0038575	FBgn0031865
FBgn0019890	FBgn0030228	FBgn0027865	FBgn0020506				FBgn0259239	FBgn0038588	FBgn0031871
FBgn0019932	FBgn0030234	FBgn0027866	FBgn0020508				FBgn0259682	FBgn0038593	FBgn0031878
FBgn0019938	FBgn0030239	FBgn0027889	FBgn0020510				FBgn0259683	FBgn0038613	FBgn0031882
FBgn0019968	FBgn0030243	FBgn0027929	FBgn0020556				FBgn0259697	FBgn0038629	FBgn0031886
FBgn0019972	FBgn0030301	FBgn0027949	FBgn0020621				FBgn0259711	FBgn0038642	FBgn0031895
FBgn0019982	FBgn0030305	FBgn0028369	FBgn0020633				FBgn0259734	FBgn0038643	FBgn0031907
FBgn0019985	FBgn0030309	FBgn0028380	FBgn0020637				FBgn0259749	FBgn0038646	FBgn0031912
FBgn0019990	FBgn0030323	FBgn0028397	FBgn0020638				FBgn0259916	FBgn0038647	FBgn0031914
FBgn0020018	FBgn0030328	FBgn0028400	FBgn0020640				FBgn0259936	FBgn0038658	FBgn0031918
FBgn0020235	FBgn0030340	FBgn0028408	FBgn0020641				FBgn0260011	FBgn0038700	FBgn0031930
FBgn0020248	FBgn0030346	FBgn0028422	FBgn0020642				FBgn0260049	FBgn0038701	FBgn0031940
FBgn0020249	FBgn0030362	FBgn0028425	FBgn0020645				FBgn0260243	FBgn0038718	FBgn0031942
FBgn0020251	FBgn0030366	FBgn0028468	FBgn0020653				FBgn0260388	FBgn0038733	FBgn0031957
FBgn0020257	FBgn0030390	FBgn0028471	FBgn0020906				FBgn0260632	FBgn0038734	FBgn0031968
FBgn0020269	FBgn0030394	FBgn0028473	FBgn0020907				FBgn0260743	FBgn0038774	FBgn0031970
FBgn0020272	FBgn0030396	FBgn0028479	FBgn0021742				FBgn0260745	FBgn0038783	FBgn0031971
FBgn0020278	FBgn0030400	FBgn0028487	FBgn0021750				FBgn0260746	FBgn0038784	FBgn0031972
FBgn0020279	FBgn0030411	FBgn0028490	FBgn0021761				FBgn0260747	FBgn0038799	FBgn0031996
FBgn0020299	FBgn0030412	FBgn0028519	FBgn0021764				FBgn0260812	FBgn0038839	FBgn0032025
FBgn0020305	FBgn0030431	FBgn0028542	FBgn0021765				FBgn0260874	FBgn0038845	FBgn0032048
FBgn0020306	FBgn0030460	FBgn0028544	FBgn0021767				FBgn0261016	FBgn0038854	FBgn0032066
FBgn0020307	FBgn0030466	FBgn0028550	FBgn0021768				FBgn0261244	FBgn0038873	FBgn0032067
FBgn0020309	FBgn0030478	FBgn0028554	FBgn0021776				FBgn0261262	FBgn0038924	FBgn0032068
FBgn0020369	FBgn0030481	FBgn0028573	FBgn0021800				FBgn0261276	FBgn0038938	FBgn0032085
FBgn0020370	FBgn0030486	FBgn0028644	FBgn0021856				FBgn0261283	FBgn0038941	FBgn0032105
FBgn0020372	FBgn0030499	FBgn0028645	FBgn0021874				FBgn0261341	FBgn0038983	FBgn0032144
FBgn0020377	FBgn0030504	FBgn0028646	FBgn0021875				FBgn0261393	FBgn0038986	FBgn0032151
FBgn0020379	FBgn0030505	FBgn0028671	FBgn0021906				FBgn0261436	FBgn0039025	FBgn0032162
FBgn0020381	FBgn0030520	FBgn0028675	FBgn0021944				FBgn0261545	FBgn0039055	FBgn0032166
FBgn0020412	FBgn0030537	FBgn0028685	FBgn0021967				FBgn0261560	FBgn0039073	FBgn0032167
FBgn0020414	FBgn0030539	FBgn0028697	FBgn0022027				FBgn0261565	FBgn0039081	FBgn0032189
FBgn0020415	FBgn0030552	FBgn0028699	FBgn0022097				FBgn0261625	FBgn0039085	FBgn0032193
FBgn0020416	FBgn0030558	FBgn0028704	FBgn0022160				FBgn0261673	FBgn0039091	FBgn0032250
FBgn0020440	FBgn0030569	FBgn0028708	FBgn0022238				FBgn0261698	FBgn0039094	FBgn0032251
FBgn0020497	FBgn0030572	FBgn0028734	FBgn0022246				FBgn0261788	FBgn0039128	FBgn0032262
FBgn0020503	FBgn0030583	FBgn0028744	FBgn0022288				FBgn0261808	FBgn0039131	FBgn0032264
FBgn0020508	FBgn0030588	FBgn0028855	FBgn0022338				FBgn0261830	FBgn0039161	FBgn0032281
FBgn0020521	FBgn0030607	FBgn0028862	FBgn0022343				FBgn0261859	FBgn0039207	FBgn0032282
FBgn0020545	FBgn0030608	FBgn0028863	FBgn0022344				FBgn0261862	FBgn0039239	FBgn0032283
FBgn0020556	FBgn0030610	FBgn0028875	FBgn0022359				FBgn0261975	FBgn0039251	FBgn0032295
FBgn0020616	FBgn0030612	FBgn0028886	FBgn0022699				FBgn0261987	FBgn0039297	FBgn0032298
FBgn0020620	FBgn0030638	FBgn0028888	FBgn0022709				FBgn0262020	FBgn0039302	FBgn0032299
FBgn0020621	FBgn0030642	FBgn0028899	FBgn0022724				FBgn0262477	FBgn0039311	FBgn0032304
FBgn0020637	FBgn0030645	FBgn0028906	FBgn0022768				FBgn0262511	FBgn0039312	FBgn0032322
FBgn0020638	FBgn0030653	FBgn0028920	FBgn0022772				FBgn0262526	FBgn0039313	FBgn0032336
FBgn0020762	FBgn0030666	FBgn0028938	FBgn0022774				FBgn0262531	FBgn0039355	FBgn0032343
FBgn0020906	FBgn0030671	FBgn0028979	FBgn0022800				FBgn0262559	FBgn0039356	FBgn0032354
FBgn0020909	FBgn0030679	FBgn0028988	FBgn0022893				FBgn0262562	FBgn0039380	FBgn0032381
FBgn0020912	FBgn0030680	FBgn0028990	FBgn0022942				FBgn0262636	FBgn0039417	FBgn0032405
FBgn0020930	FBgn0030685	FBgn0028996	FBgn0022981				FBgn0262738	FBgn0039419	FBgn0032409
FBgn0021760	FBgn0030686	FBgn0028999	FBgn0023130				FBgn0262886	FBgn0039434	FBgn0032421
FBgn0021761	FBgn0030695	FBgn0029082	FBgn0023167				FBgn0263005	FBgn0039435	FBgn0032430
FBgn0021764	FBgn0030704	FBgn0029092	FBgn0023177				FBgn0263048	FBgn0039436	FBgn0032433
FBgn0021765	FBgn0030706	FBgn0029093	FBgn0023178				FBgn0263077	FBgn0039440	FBgn0032436
FBgn0021768	FBgn0030710	FBgn0029113	FBgn0023180				FBgn0263106	FBgn0039441	FBgn0032437
FBgn0021776	FBgn0030711	FBgn0029114	FBgn0023197				FBgn0263112	FBgn0039444	FBgn0032449
FBgn0021796	FBgn0030719	FBgn0029123	FBgn0023214				FBgn0263131	FBgn0039448	FBgn0032454
FBgn0021800	FBgn0030734	FBgn0029128	FBgn0023215				FBgn0263132	FBgn0039449	FBgn0032456
FBgn0021818	FBgn0030740	FBgn0029134	FBgn0023395				FBgn0263219	FBgn0039469	FBgn0032475
FBgn0021847	FBgn0030742	FBgn0029155	FBgn0023407				FBgn0263278	FBgn0039470	FBgn0032476
FBgn0021872	FBgn0030743	FBgn0029167	FBgn0023477				FBgn0263355	FBgn0039480	FBgn0032484
FBgn0021874	FBgn0030745	FBgn0029504	FBgn0023495				FBgn0263507	FBgn0039486	FBgn0032488
FBgn0021906	FBgn0030747	FBgn0029523	FBgn0023496				FBgn0263593	FBgn0039492	FBgn0032512
FBgn0021944	FBgn0030757	FBgn0029531	FBgn0023507				FBgn0263598	FBgn0039521	FBgn0032514
FBgn0021967	FBgn0030759	FBgn0029629	FBgn0023509				FBgn0263773	FBgn0039544	FBgn0032593
FBgn0022027	FBgn0030763	FBgn0029644	FBgn0023513				FBgn0263776	FBgn0039585	FBgn0032598
FBgn0022097	FBgn0030774	FBgn0029659	FBgn0023515				FBgn0263997	FBgn0039593	FBgn0032615
FBgn0022153	FBgn0030775	FBgn0029663	FBgn0023519				FBgn0264001	FBgn0039594	FBgn0032620
FBgn0022160	FBgn0030776	FBgn0029666	FBgn0023526				FBgn0264086	FBgn0039638	FBgn0032635
FBgn0022224	FBgn0030787	FBgn0029681	FBgn0023527				FBgn0264265	FBgn0039670	FBgn0032651
FBgn0022338	FBgn0030790	FBgn0029687	FBgn0023528				FBgn0264273	FBgn0039671	FBgn0032665
FBgn0022343	FBgn0030792	FBgn0029708	FBgn0023535				FBgn0264384	FBgn0039678	FBgn0032669
FBgn0022344	FBgn0030794	FBgn0029714	FBgn0023537				FBgn0264488	FBgn0039680	FBgn0032681
FBgn0022710	FBgn0030796	FBgn0029715	FBgn0023540				FBgn0264489	FBgn0039682	FBgn0032684
FBgn0022764	FBgn0030797	FBgn0029723	FBgn0023542				FBgn0264562	FBgn0039711	FBgn0032694
FBgn0022768	FBgn0030803	FBgn0029761	FBgn0024177				FBgn0264695	FBgn0039719	FBgn0032705
FBgn0022770	FBgn0030812	FBgn0029766	FBgn0024189				FBgn0264821	FBgn0039736	FBgn0032713
FBgn0022772	FBgn0030817	FBgn0029768	FBgn0024196				FBgn0264857	FBgn0039749	FBgn0032723
FBgn0022774	FBgn0030828	FBgn0029778	FBgn0024227				FBgn0264979	FBgn0039768	FBgn0032729
FBgn0022787	FBgn0030837	FBgn0029785	FBgn0024245				FBgn0265042	FBgn0039769	FBgn0032775
FBgn0022936	FBgn0030838	FBgn0029804	FBgn0024250				FBgn0265045	FBgn0039778	FBgn0032782
FBgn0022942	FBgn0030839	FBgn0029807	FBgn0024285				FBgn0265047	FBgn0039787	FBgn0032785
FBgn0022943	FBgn0030863	FBgn0029810	FBgn0024289				FBgn0265089	FBgn0039789	FBgn0032793
FBgn0022981	FBgn0030869	FBgn0029814	FBgn0024293				FBgn0265575	FBgn0039795	FBgn0032797
FBgn0022986	FBgn0030871	FBgn0029820	FBgn0024294				FBgn0265598	FBgn0039805	FBgn0032810
FBgn0023000	FBgn0030883	FBgn0029821	FBgn0024315				FBgn0265605	FBgn0039848	FBgn0032811
FBgn0023001	FBgn0030890	FBgn0029824	FBgn0024321				FBgn0265633	FBgn0039851	FBgn0032816
FBgn0023023	FBgn0030914	FBgn0029827	FBgn0024360				FBgn0266268	FBgn0039861	FBgn0032819
FBgn0023081	FBgn0030929	FBgn0029831	FBgn0024361				FBgn0266369	FBgn0039863	FBgn0032833
FBgn0023083	FBgn0030931	FBgn0029836	FBgn0024366				FBgn0266441	FBgn0039881	FBgn0032839
FBgn0023095	FBgn0030932	FBgn0029838	FBgn0024491				FBgn0266521	FBgn0039886	FBgn0032856
FBgn0023097	FBgn0030964	FBgn0029848	FBgn0024510				FBgn0266570	FBgn0039914	FBgn0032864
FBgn0023170	FBgn0030968	FBgn0029851	FBgn0024555				FBgn0266631	FBgn0039915	FBgn0032876
FBgn0023172	FBgn0030970	FBgn0029863	FBgn0024556				FBgn0266796	FBgn0039916	FBgn0032882
FBgn0023175	FBgn0030973	FBgn0029866	FBgn0024558				FBgn0267002	FBgn0039923	FBgn0032889
FBgn0023179	FBgn0030983	FBgn0029881	FBgn0024732				FBgn0267130	FBgn0039972	FBgn0032899
FBgn0023181	FBgn0030999	FBgn0029891	FBgn0024733				FBgn0267160	FBgn0040060	FBgn0032908
FBgn0023213	FBgn0031000	FBgn0029895	FBgn0024740				FBgn0267347	FBgn0040064	FBgn0032913
FBgn0023214	FBgn0031002	FBgn0029896	FBgn0024836				FBgn0267385	FBgn0040104	FBgn0032915
FBgn0023215	FBgn0031003	FBgn0029897	FBgn0024841				FBgn0267640	FBgn0040211	FBgn0032919
FBgn0023416	FBgn0031010	FBgn0029898	FBgn0024846				FBgn0267660	FBgn0040233	FBgn0032929
FBgn0023458	FBgn0031011	FBgn0029924	FBgn0024897				FBgn0267665	FBgn0040350	FBgn0032934
FBgn0023477	FBgn0031016	FBgn0029930	FBgn0024909				FBgn0267792	FBgn0040359	FBgn0032938
FBgn0023479	FBgn0031018	FBgn0029936	FBgn0024921				FBgn0267911	FBgn0040393	FBgn0032949
FBgn0023509	FBgn0031030	FBgn0029939	FBgn0024957				FBgn0267912	FBgn0040487	FBgn0032979
FBgn0023510	FBgn0031068	FBgn0029941	FBgn0024958				FBgn0267967	FBgn0040493	FBgn0033000
FBgn0023515	FBgn0031090	FBgn0029944	FBgn0024975				FBgn0270926	FBgn0040496	FBgn0033015
FBgn0023516	FBgn0031091	FBgn0029950	FBgn0024980				FBgn0270927	FBgn0040575	FBgn0033021
FBgn0023517	FBgn0031094	FBgn0029962	FBgn0024984					FBgn0040600	FBgn0033047
FBgn0023518	FBgn0031097	FBgn0029970	FBgn0024987					FBgn0040798	FBgn0033048
FBgn0023519	FBgn0031106	FBgn0029974	FBgn0024989					FBgn0040799	FBgn0033060
FBgn0023521	FBgn0031115	FBgn0029979	FBgn0024995					FBgn0040809	FBgn0033065
FBgn0023526	FBgn0031118	FBgn0029990	FBgn0024997					FBgn0040832	FBgn0033081
FBgn0023527	FBgn0031143	FBgn0030000	FBgn0025186					FBgn0040843	FBgn0033093
FBgn0023528	FBgn0031170	FBgn0030017	FBgn0025286					FBgn0040959	FBgn0033108
FBgn0023530	FBgn0031182	FBgn0030027	FBgn0025336					FBgn0041150	FBgn0033158
FBgn0023531	FBgn0031187	FBgn0030040	FBgn0025373					FBgn0041337	FBgn0033185
FBgn0023545	FBgn0031189	FBgn0030041	FBgn0025383					FBgn0041713	FBgn0033192
FBgn0023549	FBgn0031216	FBgn0030053	FBgn0025388					FBgn0041721	FBgn0033196
FBgn0024150	FBgn0031231	FBgn0030057	FBgn0025454					FBgn0041775	FBgn0033207
FBgn0024179	FBgn0031249	FBgn0030060	FBgn0025456					FBgn0042696	FBgn0033216
FBgn0024189	FBgn0031267	FBgn0030073	FBgn0025457					FBgn0043002	FBgn0033221
FBgn0024194	FBgn0031294	FBgn0030085	FBgn0025463					FBgn0043470	FBgn0033233
FBgn0024196	FBgn0031306	FBgn0030090	FBgn0025525					FBgn0043471	FBgn0033246
FBgn0024227	FBgn0031307	FBgn0030093	FBgn0025574					FBgn0043575	FBgn0033252
FBgn0024232	FBgn0031312	FBgn0030098	FBgn0025592					FBgn0043792	FBgn0033265
FBgn0024234	FBgn0031313	FBgn0030102	FBgn0025620					FBgn0043841	FBgn0033268
FBgn0024244	FBgn0031321	FBgn0030107	FBgn0025627					FBgn0043854	FBgn0033271
FBgn0024248	FBgn0031322	FBgn0030122	FBgn0025629					FBgn0043900	FBgn0033275
FBgn0024250	FBgn0031343	FBgn0030136	FBgn0025635					FBgn0043903	FBgn0033304
FBgn0024277	FBgn0031344	FBgn0030141	FBgn0025639					FBgn0046302	FBgn0033320
FBgn0024289	FBgn0031374	FBgn0030148	FBgn0025640					FBgn0046776	FBgn0033351
FBgn0024361	FBgn0031378	FBgn0030157	FBgn0025641					FBgn0046875	FBgn0033362
FBgn0024362	FBgn0031384	FBgn0030158	FBgn0025644					FBgn0046878	FBgn0033367
FBgn0024366	FBgn0031390	FBgn0030159	FBgn0025709					FBgn0047199	FBgn0033368
FBgn0024432	FBgn0031393	FBgn0030161	FBgn0025739					FBgn0050046	FBgn0033379
FBgn0024491	FBgn0031424	FBgn0030162	FBgn0025740					FBgn0050047	FBgn0033400
FBgn0024509	FBgn0031432	FBgn0030183	FBgn0025741					FBgn0050101	FBgn0033421
FBgn0024542	FBgn0031449	FBgn0030208	FBgn0025743					FBgn0050148	FBgn0033443
FBgn0024555	FBgn0031453	FBgn0030228	FBgn0025781					FBgn0050163	FBgn0033453
FBgn0024558	FBgn0031457	FBgn0030257	FBgn0025809					FBgn0050197	FBgn0033454
FBgn0024698	FBgn0031474	FBgn0030269	FBgn0025815					FBgn0050359	FBgn0033458
FBgn0024728	FBgn0031483	FBgn0030276	FBgn0025832					FBgn0050371	FBgn0033464
FBgn0024733	FBgn0031500	FBgn0030304	FBgn0025835					FBgn0050457	FBgn0033466
FBgn0024754	FBgn0031530	FBgn0030306	FBgn0025837					FBgn0050458	FBgn0033475
FBgn0024804	FBgn0031534	FBgn0030309	FBgn0025839					FBgn0050485	FBgn0033481
FBgn0024806	FBgn0031535	FBgn0030318	FBgn0025864					FBgn0051032	FBgn0033484
FBgn0024807	FBgn0031561	FBgn0030326	FBgn0025865					FBgn0051072	FBgn0033494
FBgn0024836	FBgn0031597	FBgn0030332	FBgn0025866					FBgn0051080	FBgn0033507
FBgn0024841	FBgn0031600	FBgn0030336	FBgn0025874					FBgn0051087	FBgn0033518
FBgn0024846	FBgn0031608	FBgn0030342	FBgn0025879					FBgn0051106	FBgn0033539
FBgn0024912	FBgn0031621	FBgn0030354	FBgn0026015					FBgn0051108	FBgn0033541
FBgn0024920	FBgn0031623	FBgn0030365	FBgn0026059					FBgn0051155	FBgn0033551
FBgn0024921	FBgn0031629	FBgn0030373	FBgn0026077					FBgn0051156	FBgn0033556
FBgn0024945	FBgn0031632	FBgn0030389	FBgn0026079					FBgn0051163	FBgn0033557
FBgn0024963	FBgn0031633	FBgn0030394	FBgn0026080					FBgn0051198	FBgn0033571
FBgn0024975	FBgn0031639	FBgn0030400	FBgn0026084					FBgn0051221	FBgn0033581
FBgn0024986	FBgn0031646	FBgn0030417	FBgn0026088					FBgn0051233	FBgn0033598
FBgn0024987	FBgn0031653	FBgn0030421	FBgn0026089					FBgn0051266	FBgn0033607
FBgn0024989	FBgn0031654	FBgn0030425	FBgn0026149					FBgn0051267	FBgn0033631
FBgn0024996	FBgn0031662	FBgn0030459	FBgn0026176					FBgn0051272	FBgn0033657
FBgn0025186	FBgn0031677	FBgn0030468	FBgn0026179					FBgn0051288	FBgn0033659
FBgn0025286	FBgn0031689	FBgn0030484	FBgn0026190					FBgn0051313	FBgn0033661
FBgn0025335	FBgn0031698	FBgn0030486	FBgn0026192					FBgn0051446	FBgn0033668
FBgn0025381	FBgn0031702	FBgn0030501	FBgn0026196					FBgn0051548	FBgn0033677
FBgn0025382	FBgn0031703	FBgn0030503	FBgn0026197					FBgn0051664	FBgn0033686
FBgn0025388	FBgn0031713	FBgn0030504	FBgn0026206					FBgn0051683	FBgn0033702
FBgn0025455	FBgn0031718	FBgn0030505	FBgn0026207					FBgn0051755	FBgn0033713
FBgn0025456	FBgn0031737	FBgn0030507	FBgn0026238					FBgn0051769	FBgn0033720
FBgn0025463	FBgn0031759	FBgn0030508	FBgn0026239					FBgn0051784	FBgn0033721
FBgn0025469	FBgn0031771	FBgn0030537	FBgn0026257					FBgn0051792	FBgn0033724
FBgn0025525	FBgn0031799	FBgn0030539	FBgn0026261					FBgn0051849	FBgn0033726
FBgn0025592	FBgn0031805	FBgn0030541	FBgn0026262					FBgn0051869	FBgn0033728
FBgn0025615	FBgn0031815	FBgn0030558	FBgn0026268					FBgn0051871	FBgn0033734
FBgn0025629	FBgn0031817	FBgn0030569	FBgn0026313					FBgn0051876	FBgn0033740
FBgn0025630	FBgn0031824	FBgn0030570	FBgn0026314					FBgn0051961	FBgn0033744
FBgn0025631	FBgn0031849	FBgn0030573	FBgn0026319					FBgn0051974	FBgn0033752
FBgn0025637	FBgn0031865	FBgn0030574	FBgn0026320					FBgn0051997	FBgn0033753
FBgn0025638	FBgn0031866	FBgn0030575	FBgn0026361					FBgn0051999	FBgn0033754
FBgn0025639	FBgn0031894	FBgn0030576	FBgn0026371					FBgn0052027	FBgn0033757
FBgn0025640	FBgn0031895	FBgn0030582	FBgn0026374					FBgn0052029	FBgn0033760
FBgn0025641	FBgn0031896	FBgn0030583	FBgn0026375					FBgn0052074	FBgn0033782
FBgn0025643	FBgn0031906	FBgn0030587	FBgn0026401					FBgn0052137	FBgn0033826
FBgn0025676	FBgn0031908	FBgn0030588	FBgn0026404					FBgn0052188	FBgn0033827
FBgn0025678	FBgn0031929	FBgn0030590	FBgn0026409					FBgn0052198	FBgn0033842
FBgn0025684	FBgn0031935	FBgn0030592	FBgn0026427					FBgn0052206	FBgn0033845
FBgn0025687	FBgn0031942	FBgn0030593	FBgn0026431					FBgn0052214	FBgn0033855
FBgn0025700	FBgn0031948	FBgn0030594	FBgn0026432					FBgn0052237	FBgn0033866
FBgn0025702	FBgn0031959	FBgn0030597	FBgn0026439					FBgn0052248	FBgn0033873
FBgn0025720	FBgn0031968	FBgn0030598	FBgn0026533					FBgn0052266	FBgn0033874
FBgn0025725	FBgn0031971	FBgn0030603	FBgn0026563					FBgn0052284	FBgn0033875
FBgn0025726	FBgn0031979	FBgn0030607	FBgn0026565					FBgn0052302	FBgn0033879
FBgn0025740	FBgn0031987	FBgn0030612	FBgn0026573					FBgn0052365	FBgn0033901
FBgn0025741	FBgn0031990	FBgn0030613	FBgn0026575					FBgn0052373	FBgn0033903
FBgn0025800	FBgn0031992	FBgn0030616	FBgn0026592					FBgn0052405	FBgn0033904
FBgn0025802	FBgn0032013	FBgn0030617	FBgn0026598					FBgn0052436	FBgn0033921
FBgn0025807	FBgn0032020	FBgn0030628	FBgn0026616					FBgn0052537	FBgn0033942
FBgn0025820	FBgn0032021	FBgn0030630	FBgn0026666					FBgn0052548	FBgn0033943
FBgn0025830	FBgn0032029	FBgn0030631	FBgn0026713					FBgn0052570	FBgn0033951
FBgn0025836	FBgn0032031	FBgn0030653	FBgn0026741					FBgn0052571	FBgn0033960
FBgn0025837	FBgn0032033	FBgn0030655	FBgn0026751					FBgn0052574	FBgn0033968
FBgn0025839	FBgn0032042	FBgn0030665	FBgn0026753					FBgn0052625	FBgn0033972
FBgn0025864	FBgn0032047	FBgn0030666	FBgn0026754					FBgn0052633	FBgn0033978
FBgn0025936	FBgn0032068	FBgn0030683	FBgn0026755					FBgn0052687	FBgn0033979
FBgn0026059	FBgn0032069	FBgn0030692	FBgn0026760					FBgn0052694	FBgn0033999
FBgn0026061	FBgn0032075	FBgn0030706	FBgn0026761					FBgn0052791	FBgn0034011
FBgn0026077	FBgn0032076	FBgn0030723	FBgn0026872					FBgn0052793	FBgn0034031
FBgn0026083	FBgn0032082	FBgn0030729	FBgn0026879					FBgn0052843	FBgn0034060
FBgn0026085	FBgn0032084	FBgn0030748	FBgn0027052					FBgn0053056	FBgn0034065
FBgn0026088	FBgn0032087	FBgn0030757	FBgn0027066					FBgn0053110	FBgn0034072
FBgn0026089	FBgn0032088	FBgn0030774	FBgn0027073					FBgn0053127	FBgn0034073
FBgn0026090	FBgn0032120	FBgn0030775	FBgn0027082					FBgn0053138	FBgn0034091
FBgn0026148	FBgn0032123	FBgn0030776	FBgn0027085					FBgn0053181	FBgn0034093
FBgn0026160	FBgn0032129	FBgn0030778	FBgn0027093					FBgn0053182	FBgn0034114
FBgn0026179	FBgn0032136	FBgn0030803	FBgn0027106					FBgn0053267	FBgn0034117
FBgn0026189	FBgn0032144	FBgn0030805	FBgn0027108					FBgn0053302	FBgn0034126
FBgn0026206	FBgn0032154	FBgn0030816	FBgn0027109					FBgn0053306	FBgn0034131
FBgn0026238	FBgn0032162	FBgn0030817	FBgn0027111					FBgn0053511	FBgn0034136
FBgn0026262	FBgn0032171	FBgn0030824	FBgn0027330					FBgn0053517	FBgn0034142
FBgn0026313	FBgn0032172	FBgn0030828	FBgn0027334					FBgn0053970	FBgn0034158
FBgn0026316	FBgn0032178	FBgn0030832	FBgn0027348					FBgn0054025	FBgn0034187
FBgn0026319	FBgn0032193	FBgn0030837	FBgn0027359					FBgn0058198	FBgn0034194
FBgn0026323	FBgn0032195	FBgn0030851	FBgn0027363					FBgn0063449	FBgn0034197
FBgn0026324	FBgn0032197	FBgn0030869	FBgn0027493					FBgn0063497	FBgn0034200
FBgn0026373	FBgn0032205	FBgn0030874	FBgn0027496					FBgn0067629	FBgn0034214
FBgn0026374	FBgn0032208	FBgn0030897	FBgn0027500					FBgn0085194	FBgn0034224
FBgn0026375	FBgn0032223	FBgn0030913	FBgn0027503					FBgn0085195	FBgn0034243
FBgn0026376	FBgn0032224	FBgn0030915	FBgn0027504					FBgn0085231	FBgn0034259
FBgn0026393	FBgn0032231	FBgn0030926	FBgn0027508					FBgn0085296	FBgn0034262
FBgn0026400	FBgn0032235	FBgn0030929	FBgn0027514					FBgn0085297	FBgn0034288
FBgn0026401	FBgn0032243	FBgn0030938	FBgn0027521					FBgn0085302	FBgn0034289
FBgn0026402	FBgn0032244	FBgn0030943	FBgn0027524					FBgn0085311	FBgn0034290
FBgn0026403	FBgn0032246	FBgn0030969	FBgn0027527					FBgn0085382	FBgn0034292
FBgn0026404	FBgn0032252	FBgn0030976	FBgn0027529					FBgn0085411	FBgn0034329
FBgn0026417	FBgn0032253	FBgn0030981	FBgn0027532					FBgn0085455	FBgn0034335
FBgn0026427	FBgn0032264	FBgn0030984	FBgn0027537					FBgn0085732	FBgn0034366
FBgn0026432	FBgn0032281	FBgn0030999	FBgn0027548					FBgn0085736	FBgn0034380
FBgn0026439	FBgn0032282	FBgn0031000	FBgn0027552					FBgn0085753	FBgn0034387
FBgn0026441	FBgn0032283	FBgn0031005	FBgn0027556					FBgn0085759	FBgn0034403
FBgn0026562	FBgn0032284	FBgn0031008	FBgn0027558					FBgn0085799	FBgn0034427
FBgn0026566	FBgn0032295	FBgn0031010	FBgn0027564					FBgn0085819	FBgn0034430
FBgn0026573	FBgn0032304	FBgn0031012	FBgn0027590					FBgn0086254	FBgn0034437
FBgn0026575	FBgn0032322	FBgn0031018	FBgn0027592					FBgn0086346	FBgn0034439
FBgn0026577	FBgn0032340	FBgn0031030	FBgn0027598					FBgn0086350	FBgn0034441
FBgn0026582	FBgn0032350	FBgn0031034	FBgn0027601					FBgn0086519	FBgn0034447
FBgn0026593	FBgn0032373	FBgn0031048	FBgn0027608					FBgn0086687	FBgn0034451
FBgn0026597	FBgn0032374	FBgn0031052	FBgn0027610					FBgn0086691	FBgn0034468
FBgn0026598	FBgn0032378	FBgn0031055	FBgn0027611					FBgn0086707	FBgn0034475
FBgn0026616	FBgn0032397	FBgn0031064	FBgn0027615					FBgn0086711	FBgn0034484
FBgn0026620	FBgn0032400	FBgn0031065	FBgn0027617					FBgn0086778	FBgn0034490
FBgn0026666	FBgn0032407	FBgn0031070	FBgn0027660					FBgn0086895	FBgn0034491
FBgn0026718	FBgn0032422	FBgn0031078	FBgn0027783					FBgn0086899	FBgn0034496
FBgn0026721	FBgn0032445	FBgn0031089	FBgn0027785					FBgn0086908	FBgn0034500
FBgn0026737	FBgn0032449	FBgn0031114	FBgn0027788					FBgn0087011	FBgn0034528
FBgn0026738	FBgn0032450	FBgn0031116	FBgn0027790					FBgn0087012	FBgn0034530
FBgn0026741	FBgn0032451	FBgn0031148	FBgn0027793					FBgn0087040	FBgn0034553
FBgn0026751	FBgn0032453	FBgn0031150	FBgn0027835					FBgn0243586	FBgn0034563
FBgn0026753	FBgn0032457	FBgn0031157	FBgn0027844					FBgn0250732	FBgn0034572
FBgn0026754	FBgn0032475	FBgn0031187	FBgn0027889					FBgn0250816	FBgn0034588
FBgn0026869	FBgn0032485	FBgn0031249	FBgn0027932					FBgn0250836	FBgn0034590
FBgn0026873	FBgn0032493	FBgn0031266	FBgn0027945					FBgn0250848	FBgn0034605
FBgn0026879	FBgn0032538	FBgn0031275	FBgn0027949					FBgn0250869	FBgn0034617
FBgn0027053	FBgn0032587	FBgn0031277	FBgn0027951					FBgn0259101	FBgn0034639
FBgn0027054	FBgn0032614	FBgn0031288	FBgn0028325					FBgn0259216	FBgn0034641
FBgn0027070	FBgn0032629	FBgn0031294	FBgn0028331					FBgn0259791	FBgn0034657
FBgn0027073	FBgn0032646	FBgn0031306	FBgn0028336					FBgn0259916	FBgn0034724
FBgn0027082	FBgn0032656	FBgn0031313	FBgn0028342					FBgn0259936	FBgn0034734
FBgn0027083	FBgn0032683	FBgn0031314	FBgn0028343					FBgn0259985	FBgn0034735
FBgn0027087	FBgn0032685	FBgn0031360	FBgn0028374					FBgn0259998	FBgn0034741
FBgn0027101	FBgn0032689	FBgn0031381	FBgn0028375					FBgn0260006	FBgn0034782
FBgn0027106	FBgn0032693	FBgn0031390	FBgn0028382					FBgn0260393	FBgn0034783
FBgn0027108	FBgn0032705	FBgn0031398	FBgn0028400					FBgn0260399	FBgn0034784
FBgn0027111	FBgn0032723	FBgn0031424	FBgn0028408					FBgn0260744	FBgn0034802
FBgn0027259	FBgn0032727	FBgn0031450	FBgn0028430					FBgn0260780	FBgn0034804
FBgn0027279	FBgn0032748	FBgn0031461	FBgn0028436					FBgn0260874	FBgn0034819
FBgn0027330	FBgn0032750	FBgn0031498	FBgn0028468					FBgn0260942	FBgn0034828
FBgn0027341	FBgn0032773	FBgn0031514	FBgn0028471					FBgn0261258	FBgn0034853
FBgn0027359	FBgn0032775	FBgn0031517	FBgn0028476					FBgn0261393	FBgn0034860
FBgn0027363	FBgn0032781	FBgn0031519	FBgn0028490					FBgn0261436	FBgn0034870
FBgn0027378	FBgn0032782	FBgn0031538	FBgn0028491					FBgn0261524	FBgn0034877
FBgn0027491	FBgn0032783	FBgn0031560	FBgn0028506					FBgn0261556	FBgn0034878
FBgn0027493	FBgn0032790	FBgn0031561	FBgn0028514					FBgn0261560	FBgn0034883
FBgn0027496	FBgn0032793	FBgn0031563	FBgn0028519					FBgn0261647	FBgn0034887
FBgn0027499	FBgn0032797	FBgn0031568	FBgn0028523					FBgn0261675	FBgn0034899
FBgn0027503	FBgn0032799	FBgn0031579	FBgn0028532					FBgn0261986	FBgn0034900
FBgn0027504	FBgn0032820	FBgn0031580	FBgn0028533					FBgn0261987	FBgn0034901
FBgn0027508	FBgn0032864	FBgn0031597	FBgn0028534					FBgn0261990	FBgn0034911
FBgn0027512	FBgn0032876	FBgn0031602	FBgn0028539					FBgn0262001	FBgn0034914
FBgn0027524	FBgn0032886	FBgn0031603	FBgn0028540					FBgn0262020	FBgn0034915
FBgn0027527	FBgn0032891	FBgn0031621	FBgn0028552					FBgn0262111	FBgn0034919
FBgn0027528	FBgn0032897	FBgn0031630	FBgn0028554					FBgn0262511	FBgn0034920
FBgn0027532	FBgn0032899	FBgn0031632	FBgn0028563					FBgn0262531	FBgn0034939
FBgn0027535	FBgn0032910	FBgn0031638	FBgn0028579					FBgn0262559	FBgn0034956
FBgn0027539	FBgn0032938	FBgn0031643	FBgn0028583					FBgn0262717	FBgn0034962
FBgn0027548	FBgn0032943	FBgn0031649	FBgn0028645					FBgn0262782	FBgn0034997
FBgn0027556	FBgn0032957	FBgn0031653	FBgn0028648					FBgn0262887	FBgn0035006
FBgn0027559	FBgn0032979	FBgn0031654	FBgn0028662					FBgn0263117	FBgn0035028
FBgn0027560	FBgn0032997	FBgn0031677	FBgn0028663					FBgn0263131	FBgn0035040
FBgn0027564	FBgn0033000	FBgn0031678	FBgn0028675					FBgn0263132	FBgn0035056
FBgn0027565	FBgn0033005	FBgn0031681	FBgn0028699					FBgn0263216	FBgn0035057
FBgn0027570	FBgn0033010	FBgn0031689	FBgn0028707					FBgn0263219	FBgn0035073
FBgn0027571	FBgn0033017	FBgn0031692	FBgn0028708					FBgn0263257	FBgn0035083
FBgn0027575	FBgn0033033	FBgn0031695	FBgn0028737					FBgn0263507	FBgn0035087
FBgn0027582	FBgn0033074	FBgn0031697	FBgn0028740					FBgn0263742	FBgn0035092
FBgn0027583	FBgn0033075	FBgn0031698	FBgn0028833					FBgn0263855	FBgn0035103
FBgn0027585	FBgn0033085	FBgn0031734	FBgn0028841					FBgn0263933	FBgn0035154
FBgn0027596	FBgn0033086	FBgn0031737	FBgn0028855					FBgn0263974	FBgn0035171
FBgn0027597	FBgn0033089	FBgn0031738	FBgn0028872					FBgn0263979	FBgn0035199
FBgn0027600	FBgn0033092	FBgn0031741	FBgn0028906					FBgn0263980	FBgn0035208
FBgn0027603	FBgn0033093	FBgn0031770	FBgn0028920					FBgn0263997	FBgn0035209
FBgn0027611	FBgn0033124	FBgn0031799	FBgn0028926					FBgn0264086	FBgn0035238
FBgn0027620	FBgn0033127	FBgn0031801	FBgn0028936					FBgn0264265	FBgn0035241
FBgn0027621	FBgn0033128	FBgn0031835	FBgn0028938					FBgn0264704	FBgn0035244
FBgn0027654	FBgn0033158	FBgn0031855	FBgn0028940					FBgn0264747	FBgn0035257
FBgn0027655	FBgn0033177	FBgn0031860	FBgn0028945					FBgn0264818	FBgn0035265
FBgn0027783	FBgn0033183	FBgn0031865	FBgn0028948					FBgn0264832	FBgn0035298
FBgn0027784	FBgn0033196	FBgn0031885	FBgn0028950					FBgn0264907	FBgn0035309
FBgn0027785	FBgn0033206	FBgn0031886	FBgn0028953					FBgn0265002	FBgn0035313
FBgn0027786	FBgn0033209	FBgn0031893	FBgn0028956					FBgn0265047	FBgn0035359
FBgn0027791	FBgn0033215	FBgn0031897	FBgn0028974					FBgn0265089	FBgn0035385
FBgn0027835	FBgn0033216	FBgn0031913	FBgn0028978					FBgn0265185	FBgn0035405
FBgn0027864	FBgn0033235	FBgn0031930	FBgn0028980					FBgn0265186	FBgn0035407
FBgn0027865	FBgn0033236	FBgn0031935	FBgn0028983					FBgn0265192	FBgn0035413
FBgn0027866	FBgn0033244	FBgn0031942	FBgn0028997					FBgn0265988	FBgn0035414
FBgn0027948	FBgn0033246	FBgn0031951	FBgn0028999					FBgn0266223	FBgn0035420
FBgn0028292	FBgn0033252	FBgn0031955	FBgn0029006					FBgn0266268	FBgn0035430
FBgn0028336	FBgn0033268	FBgn0031959	FBgn0029082					FBgn0266417	FBgn0035434
FBgn0028342	FBgn0033273	FBgn0031961	FBgn0029091					FBgn0266446	FBgn0035462
FBgn0028371	FBgn0033294	FBgn0031970	FBgn0029092					FBgn0266568	FBgn0035473
FBgn0028382	FBgn0033313	FBgn0031972	FBgn0029093					FBgn0266753	FBgn0035480
FBgn0028397	FBgn0033337	FBgn0031975	FBgn0029105					FBgn0266758	FBgn0035508
FBgn0028398	FBgn0033342	FBgn0031981	FBgn0029113					FBgn0266782	FBgn0035511
FBgn0028400	FBgn0033351	FBgn0031990	FBgn0029114					FBgn0267130	FBgn0035522
FBgn0028411	FBgn0033374	FBgn0031998	FBgn0029117					FBgn0267347	FBgn0035529
FBgn0028434	FBgn0033446	FBgn0032010	FBgn0029118					FBgn0267408	FBgn0035538
FBgn0028436	FBgn0033448	FBgn0032021	FBgn0029123					FBgn0267519	FBgn0035539
FBgn0028468	FBgn0033451	FBgn0032025	FBgn0029128					FBgn0267967	FBgn0035541
FBgn0028481	FBgn0033457	FBgn0032048	FBgn0029133					FBgn0270927	FBgn0035544
FBgn0028490	FBgn0033463	FBgn0032049	FBgn0029137						FBgn0035545
FBgn0028491	FBgn0033484	FBgn0032059	FBgn0029147						FBgn0035546
FBgn0028496	FBgn0033538	FBgn0032068	FBgn0029148						FBgn0035547
FBgn0028499	FBgn0033541	FBgn0032069	FBgn0029152						FBgn0035551
FBgn0028504	FBgn0033544	FBgn0032083	FBgn0029157						FBgn0035553
FBgn0028506	FBgn0033574	FBgn0032084	FBgn0029158						FBgn0035557
FBgn0028507	FBgn0033590	FBgn0032085	FBgn0029167						FBgn0035574
FBgn0028509	FBgn0033607	FBgn0032105	FBgn0029170						FBgn0035578
FBgn0028523	FBgn0033616	FBgn0032116	FBgn0029174						FBgn0035591
FBgn0028530	FBgn0033624	FBgn0032131	FBgn0029502						FBgn0035610
FBgn0028539	FBgn0033627	FBgn0032136	FBgn0029507						FBgn0035612
FBgn0028544	FBgn0033635	FBgn0032144	FBgn0029529						FBgn0035621
FBgn0028550	FBgn0033649	FBgn0032151	FBgn0029531						FBgn0035624
FBgn0028554	FBgn0033652	FBgn0032163	FBgn0029573						FBgn0035626
FBgn0028573	FBgn0033659	FBgn0032181	FBgn0029580						FBgn0035638
FBgn0028579	FBgn0033668	FBgn0032213	FBgn0029594						FBgn0035640
FBgn0028645	FBgn0033677	FBgn0032221	FBgn0029639						FBgn0035641
FBgn0028647	FBgn0033679	FBgn0032223	FBgn0029644						FBgn0035656
FBgn0028662	FBgn0033686	FBgn0032224	FBgn0029646						FBgn0035665
FBgn0028664	FBgn0033687	FBgn0032244	FBgn0029648						FBgn0035666
FBgn0028683	FBgn0033690	FBgn0032250	FBgn0029649						FBgn0035670
FBgn0028688	FBgn0033692	FBgn0032251	FBgn0029665						FBgn0035685
FBgn0028691	FBgn0033713	FBgn0032253	FBgn0029681						FBgn0035695
FBgn0028693	FBgn0033717	FBgn0032264	FBgn0029712						FBgn0035718
FBgn0028695	FBgn0033721	FBgn0032281	FBgn0029715						FBgn0035735
FBgn0028704	FBgn0033752	FBgn0032282	FBgn0029716						FBgn0035736
FBgn0028737	FBgn0033757	FBgn0032287	FBgn0029718						FBgn0035756
FBgn0028744	FBgn0033760	FBgn0032295	FBgn0029720						FBgn0035761
FBgn0028789	FBgn0033761	FBgn0032304	FBgn0029755						FBgn0035763
FBgn0028833	FBgn0033762	FBgn0032322	FBgn0029761						FBgn0035770
FBgn0028837	FBgn0033767	FBgn0032336	FBgn0029762						FBgn0035802
FBgn0028855	FBgn0033773	FBgn0032343	FBgn0029763						FBgn0035806
FBgn0028862	FBgn0033782	FBgn0032350	FBgn0029766						FBgn0035813
FBgn0028894	FBgn0033787	FBgn0032362	FBgn0029768						FBgn0035829
FBgn0028897	FBgn0033788	FBgn0032373	FBgn0029778						FBgn0035831
FBgn0028919	FBgn0033799	FBgn0032374	FBgn0029791						FBgn0035865
FBgn0028953	FBgn0033802	FBgn0032375	FBgn0029801						FBgn0035866
FBgn0028969	FBgn0033808	FBgn0032387	FBgn0029804						FBgn0035871
FBgn0028970	FBgn0033810	FBgn0032394	FBgn0029807						FBgn0035875
FBgn0028974	FBgn0033815	FBgn0032397	FBgn0029811						FBgn0035877
FBgn0028979	FBgn0033817	FBgn0032399	FBgn0029813						FBgn0035886
FBgn0028982	FBgn0033845	FBgn0032400	FBgn0029823						FBgn0035901
FBgn0028984	FBgn0033871	FBgn0032401	FBgn0029827						FBgn0035902
FBgn0028990	FBgn0033874	FBgn0032405	FBgn0029828						FBgn0035914
FBgn0028993	FBgn0033875	FBgn0032409	FBgn0029830						FBgn0035916
FBgn0028996	FBgn0033879	FBgn0032414	FBgn0029831						FBgn0035918
FBgn0028999	FBgn0033883	FBgn0032421	FBgn0029835						FBgn0035929
FBgn0029002	FBgn0033890	FBgn0032422	FBgn0029836						FBgn0035945
FBgn0029006	FBgn0033897	FBgn0032457	FBgn0029837						FBgn0035957
FBgn0029079	FBgn0033900	FBgn0032470	FBgn0029838						FBgn0035959
FBgn0029082	FBgn0033903	FBgn0032476	FBgn0029843						FBgn0035969
FBgn0029088	FBgn0033906	FBgn0032488	FBgn0029848						FBgn0035981
FBgn0029094	FBgn0033907	FBgn0032489	FBgn0029849						FBgn0035985
FBgn0029114	FBgn0033913	FBgn0032493	FBgn0029851						FBgn0035993
FBgn0029117	FBgn0033919	FBgn0032495	FBgn0029854						FBgn0036008
FBgn0029118	FBgn0033921	FBgn0032515	FBgn0029857						FBgn0036030
FBgn0029121	FBgn0033926	FBgn0032518	FBgn0029858						FBgn0036035
FBgn0029123	FBgn0033942	FBgn0032538	FBgn0029861						FBgn0036043
FBgn0029128	FBgn0033945	FBgn0032629	FBgn0029866						FBgn0036046
FBgn0029133	FBgn0033968	FBgn0032633	FBgn0029868						FBgn0036062
FBgn0029134	FBgn0033973	FBgn0032635	FBgn0029879						FBgn0036102
FBgn0029157	FBgn0033979	FBgn0032640	FBgn0029881						FBgn0036108
FBgn0029167	FBgn0033984	FBgn0032642	FBgn0029885						FBgn0036121
FBgn0029174	FBgn0033989	FBgn0032663	FBgn0029887						FBgn0036124
FBgn0029502	FBgn0033993	FBgn0032669	FBgn0029888						FBgn0036125
FBgn0029504	FBgn0034001	FBgn0032685	FBgn0029892						FBgn0036139
FBgn0029512	FBgn0034008	FBgn0032689	FBgn0029896						FBgn0036141
FBgn0029514	FBgn0034010	FBgn0032693	FBgn0029898						FBgn0036145
FBgn0029524	FBgn0034011	FBgn0032701	FBgn0029903						FBgn0036147
FBgn0029529	FBgn0034013	FBgn0032715	FBgn0029911						FBgn0036194
FBgn0029594	FBgn0034021	FBgn0032717	FBgn0029924						FBgn0036196
FBgn0029639	FBgn0034031	FBgn0032727	FBgn0029929						FBgn0036199
FBgn0029648	FBgn0034046	FBgn0032741	FBgn0029930						FBgn0036205
FBgn0029664	FBgn0034058	FBgn0032752	FBgn0029932						FBgn0036226
FBgn0029665	FBgn0034065	FBgn0032773	FBgn0029936						FBgn0036227
FBgn0029688	FBgn0034067	FBgn0032775	FBgn0029937						FBgn0036248
FBgn0029709	FBgn0034070	FBgn0032782	FBgn0029939						FBgn0036254
FBgn0029712	FBgn0034072	FBgn0032783	FBgn0029941						FBgn0036262
FBgn0029713	FBgn0034091	FBgn0032797	FBgn0029944						FBgn0036266
FBgn0029714	FBgn0034098	FBgn0032805	FBgn0029950						FBgn0036273
FBgn0029715	FBgn0034126	FBgn0032811	FBgn0029969						FBgn0036298
FBgn0029718	FBgn0034140	FBgn0032816	FBgn0029970						FBgn0036309
FBgn0029737	FBgn0034143	FBgn0032820	FBgn0029979						FBgn0036320
FBgn0029766	FBgn0034158	FBgn0032840	FBgn0029980						FBgn0036321
FBgn0029791	FBgn0034180	FBgn0032843	FBgn0029990						FBgn0036323
FBgn0029800	FBgn0034187	FBgn0032856	FBgn0029994						FBgn0036330
FBgn0029804	FBgn0034197	FBgn0032857	FBgn0029996						FBgn0036332
FBgn0029807	FBgn0034201	FBgn0032864	FBgn0029997						FBgn0036334
FBgn0029813	FBgn0034204	FBgn0032876	FBgn0029999						FBgn0036340
FBgn0029814	FBgn0034245	FBgn0032882	FBgn0030001						FBgn0036352
FBgn0029819	FBgn0034259	FBgn0032889	FBgn0030007						FBgn0036354
FBgn0029821	FBgn0034282	FBgn0032897	FBgn0030011						FBgn0036361
FBgn0029823	FBgn0034288	FBgn0032900	FBgn0030013						FBgn0036362
FBgn0029825	FBgn0034289	FBgn0032908	FBgn0030017						FBgn0036364
FBgn0029831	FBgn0034292	FBgn0032910	FBgn0030018						FBgn0036367
FBgn0029833	FBgn0034294	FBgn0032923	FBgn0030026						FBgn0036369
FBgn0029834	FBgn0034295	FBgn0032925	FBgn0030027						FBgn0036376
FBgn0029840	FBgn0034307	FBgn0032946	FBgn0030028						FBgn0036390
FBgn0029849	FBgn0034312	FBgn0032957	FBgn0030034						FBgn0036391
FBgn0029853	FBgn0034313	FBgn0032987	FBgn0030039						FBgn0036395
FBgn0029854	FBgn0034314	FBgn0033000	FBgn0030040						FBgn0036396
FBgn0029857	FBgn0034365	FBgn0033010	FBgn0030041						FBgn0036402
FBgn0029858	FBgn0034366	FBgn0033015	FBgn0030049						FBgn0036422
FBgn0029860	FBgn0034401	FBgn0033033	FBgn0030053						FBgn0036423
FBgn0029864	FBgn0034403	FBgn0033069	FBgn0030054						FBgn0036436
FBgn0029866	FBgn0034405	FBgn0033079	FBgn0030057						FBgn0036460
FBgn0029868	FBgn0034406	FBgn0033081	FBgn0030061						FBgn0036466
FBgn0029878	FBgn0034433	FBgn0033108	FBgn0030066						FBgn0036467
FBgn0029879	FBgn0034437	FBgn0033113	FBgn0030067						FBgn0036468
FBgn0029881	FBgn0034455	FBgn0033115	FBgn0030077						FBgn0036469
FBgn0029885	FBgn0034464	FBgn0033124	FBgn0030081						FBgn0036470
FBgn0029888	FBgn0034468	FBgn0033128	FBgn0030085						FBgn0036471
FBgn0029892	FBgn0034470	FBgn0033130	FBgn0030090						FBgn0036480
FBgn0029895	FBgn0034475	FBgn0033132	FBgn0030093						FBgn0036481
FBgn0029896	FBgn0034487	FBgn0033135	FBgn0030098						FBgn0036489
FBgn0029897	FBgn0034488	FBgn0033159	FBgn0030102						FBgn0036501
FBgn0029898	FBgn0034491	FBgn0033169	FBgn0030105						FBgn0036502
FBgn0029899	FBgn0034497	FBgn0033174	FBgn0030107						FBgn0036512
FBgn0029903	FBgn0034499	FBgn0033184	FBgn0030114						FBgn0036518
FBgn0029913	FBgn0034528	FBgn0033185	FBgn0030121						FBgn0036522
FBgn0029914	FBgn0034535	FBgn0033192	FBgn0030122						FBgn0036546
FBgn0029915	FBgn0034543	FBgn0033196	FBgn0030141						FBgn0036556
FBgn0029924	FBgn0034568	FBgn0033199	FBgn0030156						FBgn0036557
FBgn0029929	FBgn0034570	FBgn0033204	FBgn0030158						FBgn0036563
FBgn0029931	FBgn0034578	FBgn0033205	FBgn0030159						FBgn0036565
FBgn0029936	FBgn0034588	FBgn0033215	FBgn0030160						FBgn0036575
FBgn0029937	FBgn0034598	FBgn0033216	FBgn0030170						FBgn0036576
FBgn0029939	FBgn0034614	FBgn0033224	FBgn0030177						FBgn0036583
FBgn0029941	FBgn0034628	FBgn0033233	FBgn0030187						FBgn0036588
FBgn0029942	FBgn0034629	FBgn0033234	FBgn0030218						FBgn0036601
FBgn0029959	FBgn0034638	FBgn0033250	FBgn0030228						FBgn0036624
FBgn0029969	FBgn0034662	FBgn0033252	FBgn0030239						FBgn0036640
FBgn0029974	FBgn0034688	FBgn0033268	FBgn0030241						FBgn0036646
FBgn0029975	FBgn0034691	FBgn0033271	FBgn0030242						FBgn0036663
FBgn0029980	FBgn0034694	FBgn0033275	FBgn0030243						FBgn0036689
FBgn0029992	FBgn0034703	FBgn0033292	FBgn0030245						FBgn0036698
FBgn0029996	FBgn0034705	FBgn0033294	FBgn0030258						FBgn0036717
FBgn0029997	FBgn0034709	FBgn0033304	FBgn0030260						FBgn0036728
FBgn0029999	FBgn0034717	FBgn0033308	FBgn0030261						FBgn0036742
FBgn0030007	FBgn0034718	FBgn0033316	FBgn0030268						FBgn0036752
FBgn0030011	FBgn0034723	FBgn0033320	FBgn0030269						FBgn0036756
FBgn0030012	FBgn0034729	FBgn0033352	FBgn0030271						FBgn0036759
FBgn0030013	FBgn0034742	FBgn0033356	FBgn0030272						FBgn0036764
FBgn0030018	FBgn0034808	FBgn0033359	FBgn0030292						FBgn0036766
FBgn0030025	FBgn0034819	FBgn0033362	FBgn0030293						FBgn0036773
FBgn0030026	FBgn0034828	FBgn0033363	FBgn0030301						FBgn0036775
FBgn0030028	FBgn0034858	FBgn0033368	FBgn0030304						FBgn0036777
FBgn0030034	FBgn0034885	FBgn0033374	FBgn0030309						FBgn0036781
FBgn0030039	FBgn0034901	FBgn0033377	FBgn0030314						FBgn0036786
FBgn0030040	FBgn0034918	FBgn0033381	FBgn0030326						FBgn0036787
FBgn0030041	FBgn0034919	FBgn0033387	FBgn0030328						FBgn0036806
FBgn0030049	FBgn0034920	FBgn0033400	FBgn0030331						FBgn0036811
FBgn0030054	FBgn0034924	FBgn0033405	FBgn0030340						FBgn0036815
FBgn0030060	FBgn0034925	FBgn0033427	FBgn0030343						FBgn0036816
FBgn0030065	FBgn0034933	FBgn0033446	FBgn0030350						FBgn0036827
FBgn0030066	FBgn0034985	FBgn0033451	FBgn0030351						FBgn0036831
FBgn0030067	FBgn0034999	FBgn0033453	FBgn0030352						FBgn0036835
FBgn0030082	FBgn0035001	FBgn0033466	FBgn0030357						FBgn0036836
FBgn0030086	FBgn0035006	FBgn0033471	FBgn0030362						FBgn0036838
FBgn0030091	FBgn0035025	FBgn0033475	FBgn0030373						FBgn0036843
FBgn0030092	FBgn0035033	FBgn0033481	FBgn0030390						FBgn0036850
FBgn0030099	FBgn0035035	FBgn0033484	FBgn0030394						FBgn0036862
FBgn0030100	FBgn0035039	FBgn0033504	FBgn0030398						FBgn0036872
FBgn0030109	FBgn0035044	FBgn0033526	FBgn0030403						FBgn0036876
FBgn0030121	FBgn0035065	FBgn0033538	FBgn0030406						FBgn0036889
FBgn0030122	FBgn0035083	FBgn0033539	FBgn0030407						FBgn0036891
FBgn0030136	FBgn0035089	FBgn0033541	FBgn0030411						FBgn0036906
FBgn0030137	FBgn0035099	FBgn0033574	FBgn0030420						FBgn0036910
FBgn0030148	FBgn0035122	FBgn0033582	FBgn0030425						FBgn0036947
FBgn0030160	FBgn0035142	FBgn0033584	FBgn0030433						FBgn0036948
FBgn0030177	FBgn0035151	FBgn0033587	FBgn0030437						FBgn0036949
FBgn0030178	FBgn0035153	FBgn0033589	FBgn0030447						FBgn0036951
FBgn0030187	FBgn0035169	FBgn0033590	FBgn0030459						FBgn0036952
FBgn0030196	FBgn0035189	FBgn0033591	FBgn0030460						FBgn0036953
FBgn0030206	FBgn0035203	FBgn0033598	FBgn0030466						FBgn0036956
FBgn0030234	FBgn0035207	FBgn0033603	FBgn0030478						FBgn0036975
FBgn0030239	FBgn0035208	FBgn0033607	FBgn0030480						FBgn0036978
FBgn0030251	FBgn0035213	FBgn0033628	FBgn0030481						FBgn0036990
FBgn0030266	FBgn0035233	FBgn0033635	FBgn0030482						FBgn0036992
FBgn0030291	FBgn0035265	FBgn0033645	FBgn0030484						FBgn0036995
FBgn0030292	FBgn0035266	FBgn0033649	FBgn0030485						FBgn0036996
FBgn0030294	FBgn0035268	FBgn0033652	FBgn0030486						FBgn0036997
FBgn0030301	FBgn0035272	FBgn0033657	FBgn0030494						FBgn0037007
FBgn0030305	FBgn0035283	FBgn0033659	FBgn0030500						FBgn0037010
FBgn0030309	FBgn0035308	FBgn0033661	FBgn0030501						FBgn0037044
FBgn0030320	FBgn0035312	FBgn0033663	FBgn0030507						FBgn0037057
FBgn0030323	FBgn0035334	FBgn0033667	FBgn0030509						FBgn0037065
FBgn0030328	FBgn0035335	FBgn0033668	FBgn0030511						FBgn0037082
FBgn0030329	FBgn0035356	FBgn0033679	FBgn0030518						FBgn0037094
FBgn0030343	FBgn0035357	FBgn0033699	FBgn0030519						FBgn0037099
FBgn0030344	FBgn0035359	FBgn0033702	FBgn0030520						FBgn0037106
FBgn0030345	FBgn0035360	FBgn0033713	FBgn0030528						FBgn0037117
FBgn0030346	FBgn0035374	FBgn0033720	FBgn0030537						FBgn0037127
FBgn0030347	FBgn0035397	FBgn0033721	FBgn0030539						FBgn0037131
FBgn0030350	FBgn0035398	FBgn0033724	FBgn0030540						FBgn0037138
FBgn0030351	FBgn0035410	FBgn0033729	FBgn0030543						FBgn0037165
FBgn0030352	FBgn0035411	FBgn0033730	FBgn0030551						FBgn0037174
FBgn0030360	FBgn0035414	FBgn0033740	FBgn0030552						FBgn0037176
FBgn0030362	FBgn0035420	FBgn0033744	FBgn0030558						FBgn0037177
FBgn0030365	FBgn0035424	FBgn0033750	FBgn0030569						FBgn0037181
FBgn0030366	FBgn0035434	FBgn0033752	FBgn0030570						FBgn0037186
FBgn0030373	FBgn0035435	FBgn0033753	FBgn0030572						FBgn0037197
FBgn0030394	FBgn0035438	FBgn0033757	FBgn0030584						FBgn0037203
FBgn0030400	FBgn0035449	FBgn0033760	FBgn0030587						FBgn0037204
FBgn0030403	FBgn0035461	FBgn0033761	FBgn0030590						FBgn0037217
FBgn0030406	FBgn0035475	FBgn0033762	FBgn0030592						FBgn0037222
FBgn0030431	FBgn0035483	FBgn0033769	FBgn0030593						FBgn0037225
FBgn0030432	FBgn0035484	FBgn0033773	FBgn0030594						FBgn0037228
FBgn0030433	FBgn0035495	FBgn0033774	FBgn0030597						FBgn0037230
FBgn0030447	FBgn0035497	FBgn0033777	FBgn0030598						FBgn0037232
FBgn0030460	FBgn0035498	FBgn0033788	FBgn0030600						FBgn0037236
FBgn0030465	FBgn0035504	FBgn0033793	FBgn0030605						FBgn0037248
FBgn0030466	FBgn0035513	FBgn0033815	FBgn0030607						FBgn0037252
FBgn0030467	FBgn0035529	FBgn0033821	FBgn0030610						FBgn0037288
FBgn0030480	FBgn0035532	FBgn0033826	FBgn0030611						FBgn0037298
FBgn0030481	FBgn0035533	FBgn0033827	FBgn0030612						FBgn0037323
FBgn0030482	FBgn0035540	FBgn0033842	FBgn0030617						FBgn0037328
FBgn0030484	FBgn0035544	FBgn0033845	FBgn0030628						FBgn0037354
FBgn0030486	FBgn0035545	FBgn0033869	FBgn0030629						FBgn0037359
FBgn0030501	FBgn0035547	FBgn0033872	FBgn0030631						FBgn0037364
FBgn0030503	FBgn0035551	FBgn0033873	FBgn0030645						FBgn0037372
FBgn0030504	FBgn0035558	FBgn0033874	FBgn0030668						FBgn0037376
FBgn0030505	FBgn0035569	FBgn0033876	FBgn0030671						FBgn0037395
FBgn0030510	FBgn0035570	FBgn0033879	FBgn0030679						FBgn0037409
FBgn0030518	FBgn0035572	FBgn0033887	FBgn0030680						FBgn0037410
FBgn0030519	FBgn0035582	FBgn0033901	FBgn0030686						FBgn0037411
FBgn0030521	FBgn0035583	FBgn0033902	FBgn0030688						FBgn0037413
FBgn0030537	FBgn0035588	FBgn0033903	FBgn0030695						FBgn0037419
FBgn0030539	FBgn0035603	FBgn0033912	FBgn0030704						FBgn0037420
FBgn0030545	FBgn0035610	FBgn0033917	FBgn0030710						FBgn0037421
FBgn0030551	FBgn0035611	FBgn0033921	FBgn0030718						FBgn0037446
FBgn0030552	FBgn0035612	FBgn0033925	FBgn0030720						FBgn0037447
FBgn0030558	FBgn0035617	FBgn0033926	FBgn0030746						FBgn0037468
FBgn0030569	FBgn0035619	FBgn0033928	FBgn0030756						FBgn0037485
FBgn0030571	FBgn0035621	FBgn0033943	FBgn0030759						FBgn0037504
FBgn0030572	FBgn0035638	FBgn0033945	FBgn0030766						FBgn0037520
FBgn0030573	FBgn0035641	FBgn0033958	FBgn0030768						FBgn0037521
FBgn0030574	FBgn0035642	FBgn0033968	FBgn0030774						FBgn0037537
FBgn0030584	FBgn0035665	FBgn0033979	FBgn0030775						FBgn0037538
FBgn0030593	FBgn0035666	FBgn0033983	FBgn0030776						FBgn0037546
FBgn0030594	FBgn0035667	FBgn0033987	FBgn0030777						FBgn0037549
FBgn0030600	FBgn0035670	FBgn0033994	FBgn0030786						FBgn0037552
FBgn0030603	FBgn0035688	FBgn0034010	FBgn0030788						FBgn0037553
FBgn0030605	FBgn0035699	FBgn0034011	FBgn0030789						FBgn0037555
FBgn0030611	FBgn0035708	FBgn0034013	FBgn0030790						FBgn0037561
FBgn0030613	FBgn0035710	FBgn0034021	FBgn0030798						FBgn0037563
FBgn0030617	FBgn0035718	FBgn0034031	FBgn0030803						FBgn0037574
FBgn0030631	FBgn0035724	FBgn0034035	FBgn0030805						FBgn0037607
FBgn0030657	FBgn0035725	FBgn0034046	FBgn0030808						FBgn0037621
FBgn0030660	FBgn0035735	FBgn0034053	FBgn0030812						FBgn0037623
FBgn0030662	FBgn0035770	FBgn0034060	FBgn0030813						FBgn0037634
FBgn0030666	FBgn0035779	FBgn0034066	FBgn0030816						FBgn0037635
FBgn0030669	FBgn0035781	FBgn0034070	FBgn0030817						FBgn0037645
FBgn0030671	FBgn0035793	FBgn0034084	FBgn0030828						FBgn0037648
FBgn0030674	FBgn0035798	FBgn0034098	FBgn0030832						FBgn0037660
FBgn0030678	FBgn0035831	FBgn0034118	FBgn0030833						FBgn0037678
FBgn0030679	FBgn0035839	FBgn0034136	FBgn0030834						FBgn0037709
FBgn0030680	FBgn0035859	FBgn0034138	FBgn0030836						FBgn0037714
FBgn0030683	FBgn0035886	FBgn0034140	FBgn0030837						FBgn0037715
FBgn0030686	FBgn0035904	FBgn0034159	FBgn0030841						FBgn0037717
FBgn0030700	FBgn0035907	FBgn0034160	FBgn0030853						FBgn0037730
FBgn0030703	FBgn0035911	FBgn0034184	FBgn0030863						FBgn0037737
FBgn0030706	FBgn0035917	FBgn0034187	FBgn0030864						FBgn0037746
FBgn0030716	FBgn0035926	FBgn0034194	FBgn0030869						FBgn0037756
FBgn0030718	FBgn0035942	FBgn0034197	FBgn0030870						FBgn0037758
FBgn0030720	FBgn0035945	FBgn0034199	FBgn0030878						FBgn0037782
FBgn0030723	FBgn0035955	FBgn0034200	FBgn0030894						FBgn0037788
FBgn0030739	FBgn0035957	FBgn0034201	FBgn0030900						FBgn0037792
FBgn0030740	FBgn0035959	FBgn0034204	FBgn0030914						FBgn0037794
FBgn0030743	FBgn0035964	FBgn0034221	FBgn0030915						FBgn0037807
FBgn0030747	FBgn0035968	FBgn0034282	FBgn0030925						FBgn0037815
FBgn0030757	FBgn0035978	FBgn0034286	FBgn0030928						FBgn0037831
FBgn0030759	FBgn0035983	FBgn0034288	FBgn0030929						FBgn0037836
FBgn0030763	FBgn0035985	FBgn0034289	FBgn0030938						FBgn0037838
FBgn0030775	FBgn0035986	FBgn0034292	FBgn0030956						FBgn0037842
FBgn0030786	FBgn0035989	FBgn0034294	FBgn0030959						FBgn0037844
FBgn0030792	FBgn0036004	FBgn0034295	FBgn0030964						FBgn0037846
FBgn0030793	FBgn0036008	FBgn0034296	FBgn0030966						FBgn0037852
FBgn0030796	FBgn0036024	FBgn0034301	FBgn0030968						FBgn0037870
FBgn0030799	FBgn0036028	FBgn0034329	FBgn0030976						FBgn0037873
FBgn0030802	FBgn0036030	FBgn0034335	FBgn0030980						FBgn0037878
FBgn0030805	FBgn0036035	FBgn0034345	FBgn0030981						FBgn0037890
FBgn0030807	FBgn0036038	FBgn0034354	FBgn0030993						FBgn0037891
FBgn0030809	FBgn0036039	FBgn0034361	FBgn0030995						FBgn0037895
FBgn0030812	FBgn0036043	FBgn0034366	FBgn0030999						FBgn0037906
FBgn0030813	FBgn0036059	FBgn0034380	FBgn0031001						FBgn0037918
FBgn0030817	FBgn0036106	FBgn0034391	FBgn0031004						FBgn0037920
FBgn0030834	FBgn0036111	FBgn0034394	FBgn0031011						FBgn0037926
FBgn0030847	FBgn0036121	FBgn0034396	FBgn0031016						FBgn0037936
FBgn0030853	FBgn0036126	FBgn0034398	FBgn0031021						FBgn0037942
FBgn0030864	FBgn0036131	FBgn0034403	FBgn0031030						FBgn0037943
FBgn0030869	FBgn0036134	FBgn0034417	FBgn0031034						FBgn0037958
FBgn0030871	FBgn0036141	FBgn0034430	FBgn0031037						FBgn0037978
FBgn0030873	FBgn0036144	FBgn0034443	FBgn0031040						FBgn0037992
FBgn0030874	FBgn0036152	FBgn0034451	FBgn0031050						FBgn0037993
FBgn0030877	FBgn0036165	FBgn0034468	FBgn0031052						FBgn0037996
FBgn0030878	FBgn0036192	FBgn0034470	FBgn0031066						FBgn0037999
FBgn0030883	FBgn0036199	FBgn0034475	FBgn0031070						FBgn0038009
FBgn0030892	FBgn0036208	FBgn0034476	FBgn0031078						FBgn0038017
FBgn0030897	FBgn0036227	FBgn0034490	FBgn0031080						FBgn0038028
FBgn0030912	FBgn0036254	FBgn0034491	FBgn0031092						FBgn0038053
FBgn0030914	FBgn0036255	FBgn0034497	FBgn0031093						FBgn0038058
FBgn0030915	FBgn0036257	FBgn0034499	FBgn0031094						FBgn0038070
FBgn0030929	FBgn0036262	FBgn0034500	FBgn0031114						FBgn0038071
FBgn0030931	FBgn0036266	FBgn0034501	FBgn0031118						FBgn0038073
FBgn0030932	FBgn0036271	FBgn0034520	FBgn0031126						FBgn0038083
FBgn0030938	FBgn0036272	FBgn0034530	FBgn0031143						FBgn0038092
FBgn0030941	FBgn0036291	FBgn0034570	FBgn0031150						FBgn0038095
FBgn0030943	FBgn0036300	FBgn0034572	FBgn0031157						FBgn0038098
FBgn0030944	FBgn0036309	FBgn0034588	FBgn0031182						FBgn0038126
FBgn0030956	FBgn0036324	FBgn0034606	FBgn0031184						FBgn0038132
FBgn0030959	FBgn0036330	FBgn0034617	FBgn0031189						FBgn0038135
FBgn0030960	FBgn0036332	FBgn0034618	FBgn0031216						FBgn0038139
FBgn0030963	FBgn0036333	FBgn0034638	FBgn0031219						FBgn0038146
FBgn0030968	FBgn0036334	FBgn0034661	FBgn0031220						FBgn0038147
FBgn0030981	FBgn0036335	FBgn0034662	FBgn0031227						FBgn0038148
FBgn0030990	FBgn0036349	FBgn0034693	FBgn0031228						FBgn0038150
FBgn0030997	FBgn0036350	FBgn0034709	FBgn0031231						FBgn0038153
FBgn0030999	FBgn0036362	FBgn0034712	FBgn0031232						FBgn0038160
FBgn0031000	FBgn0036366	FBgn0034716	FBgn0031239						FBgn0038161
FBgn0031001	FBgn0036368	FBgn0034717	FBgn0031247						FBgn0038179
FBgn0031006	FBgn0036372	FBgn0034734	FBgn0031248						FBgn0038181
FBgn0031008	FBgn0036376	FBgn0034743	FBgn0031249						FBgn0038183
FBgn0031016	FBgn0036397	FBgn0034748	FBgn0031251						FBgn0038191
FBgn0031018	FBgn0036398	FBgn0034755	FBgn0031252						FBgn0038196
FBgn0031021	FBgn0036422	FBgn0034756	FBgn0031253						FBgn0038202
FBgn0031023	FBgn0036428	FBgn0034783	FBgn0031258						FBgn0038211
FBgn0031030	FBgn0036433	FBgn0034808	FBgn0031266						FBgn0038224
FBgn0031040	FBgn0036448	FBgn0034819	FBgn0031276						FBgn0038240
FBgn0031048	FBgn0036451	FBgn0034828	FBgn0031282						FBgn0038242
FBgn0031049	FBgn0036459	FBgn0034859	FBgn0031286						FBgn0038251
FBgn0031050	FBgn0036461	FBgn0034878	FBgn0031289						FBgn0038252
FBgn0031051	FBgn0036463	FBgn0034887	FBgn0031296						FBgn0038257
FBgn0031052	FBgn0036467	FBgn0034903	FBgn0031308						FBgn0038261
FBgn0031060	FBgn0036469	FBgn0034911	FBgn0031312						FBgn0038262
FBgn0031064	FBgn0036470	FBgn0034914	FBgn0031313						FBgn0038277
FBgn0031077	FBgn0036471	FBgn0034920	FBgn0031320						FBgn0038282
FBgn0031078	FBgn0036476	FBgn0034928	FBgn0031321						FBgn0038290
FBgn0031089	FBgn0036484	FBgn0034939	FBgn0031322						FBgn0038300
FBgn0031093	FBgn0036493	FBgn0034962	FBgn0031324						FBgn0038337
FBgn0031094	FBgn0036502	FBgn0034976	FBgn0031357						FBgn0038387
FBgn0031097	FBgn0036515	FBgn0034997	FBgn0031361						FBgn0038388
FBgn0031099	FBgn0036518	FBgn0035006	FBgn0031374						FBgn0038394
FBgn0031106	FBgn0036534	FBgn0035016	FBgn0031378						FBgn0038400
FBgn0031107	FBgn0036547	FBgn0035023	FBgn0031389						FBgn0038419
FBgn0031115	FBgn0036551	FBgn0035027	FBgn0031390						FBgn0038429
FBgn0031118	FBgn0036556	FBgn0035028	FBgn0031392						FBgn0038431
FBgn0031143	FBgn0036563	FBgn0035041	FBgn0031398						FBgn0038439
FBgn0031145	FBgn0036589	FBgn0035043	FBgn0031401						FBgn0038447
FBgn0031157	FBgn0036600	FBgn0035049	FBgn0031418						FBgn0038453
FBgn0031170	FBgn0036607	FBgn0035056	FBgn0031426						FBgn0038462
FBgn0031182	FBgn0036620	FBgn0035082	FBgn0031428						FBgn0038465
FBgn0031184	FBgn0036638	FBgn0035092	FBgn0031432						FBgn0038470
FBgn0031187	FBgn0036639	FBgn0035106	FBgn0031434						FBgn0038472
FBgn0031216	FBgn0036646	FBgn0035113	FBgn0031435						FBgn0038476
FBgn0031224	FBgn0036648	FBgn0035142	FBgn0031436						FBgn0038478
FBgn0031227	FBgn0036662	FBgn0035150	FBgn0031450						FBgn0038482
FBgn0031228	FBgn0036685	FBgn0035155	FBgn0031452						FBgn0038484
FBgn0031229	FBgn0036688	FBgn0035162	FBgn0031456						FBgn0038505
FBgn0031231	FBgn0036698	FBgn0035166	FBgn0031457						FBgn0038526
FBgn0031244	FBgn0036714	FBgn0035170	FBgn0031466						FBgn0038527
FBgn0031245	FBgn0036717	FBgn0035187	FBgn0031467						FBgn0038535
FBgn0031247	FBgn0036725	FBgn0035189	FBgn0031473						FBgn0038542
FBgn0031249	FBgn0036735	FBgn0035192	FBgn0031485						FBgn0038551
FBgn0031252	FBgn0036742	FBgn0035199	FBgn0031494						FBgn0038564
FBgn0031256	FBgn0036746	FBgn0035208	FBgn0031498						FBgn0038575
FBgn0031257	FBgn0036749	FBgn0035241	FBgn0031500						FBgn0038585
FBgn0031258	FBgn0036752	FBgn0035249	FBgn0031505						FBgn0038588
FBgn0031260	FBgn0036754	FBgn0035252	FBgn0031514						FBgn0038593
FBgn0031266	FBgn0036763	FBgn0035262	FBgn0031517						FBgn0038595
FBgn0031268	FBgn0036764	FBgn0035280	FBgn0031519						FBgn0038596
FBgn0031270	FBgn0036765	FBgn0035281	FBgn0031520						FBgn0038597
FBgn0031275	FBgn0036770	FBgn0035293	FBgn0031522						FBgn0038610
FBgn0031287	FBgn0036773	FBgn0035309	FBgn0031523						FBgn0038613
FBgn0031294	FBgn0036774	FBgn0035313	FBgn0031533						FBgn0038629
FBgn0031306	FBgn0036786	FBgn0035348	FBgn0031540						FBgn0038643
FBgn0031307	FBgn0036791	FBgn0035358	FBgn0031544						FBgn0038645
FBgn0031312	FBgn0036801	FBgn0035359	FBgn0031548						FBgn0038646
FBgn0031313	FBgn0036805	FBgn0035383	FBgn0031549						FBgn0038660
FBgn0031320	FBgn0036811	FBgn0035397	FBgn0031558						FBgn0038662
FBgn0031321	FBgn0036814	FBgn0035405	FBgn0031560						FBgn0038680
FBgn0031322	FBgn0036816	FBgn0035420	FBgn0031561						FBgn0038681
FBgn0031343	FBgn0036819	FBgn0035422	FBgn0031562						FBgn0038683
FBgn0031344	FBgn0036821	FBgn0035424	FBgn0031563						FBgn0038718
FBgn0031351	FBgn0036824	FBgn0035428	FBgn0031571						FBgn0038727
FBgn0031361	FBgn0036826	FBgn0035429	FBgn0031574						FBgn0038750
FBgn0031374	FBgn0036827	FBgn0035430	FBgn0031579						FBgn0038753
FBgn0031377	FBgn0036837	FBgn0035431	FBgn0031580						FBgn0038772
FBgn0031378	FBgn0036843	FBgn0035434	FBgn0031597						FBgn0038799
FBgn0031381	FBgn0036850	FBgn0035452	FBgn0031604						FBgn0038826
FBgn0031390	FBgn0036853	FBgn0035461	FBgn0031610						FBgn0038853
FBgn0031391	FBgn0036893	FBgn0035477	FBgn0031619						FBgn0038869
FBgn0031399	FBgn0036895	FBgn0035480	FBgn0031632						FBgn0038873
FBgn0031413	FBgn0036897	FBgn0035481	FBgn0031633						FBgn0038878
FBgn0031424	FBgn0036911	FBgn0035490	FBgn0031639						FBgn0038886
FBgn0031428	FBgn0036931	FBgn0035495	FBgn0031646						FBgn0038903
FBgn0031437	FBgn0036935	FBgn0035498	FBgn0031651						FBgn0038922
FBgn0031450	FBgn0036940	FBgn0035505	FBgn0031653						FBgn0038924
FBgn0031451	FBgn0036945	FBgn0035508	FBgn0031654						FBgn0038938
FBgn0031452	FBgn0036948	FBgn0035511	FBgn0031657						FBgn0038941
FBgn0031459	FBgn0036949	FBgn0035513	FBgn0031660						FBgn0038942
FBgn0031461	FBgn0036951	FBgn0035515	FBgn0031662						FBgn0038951
FBgn0031474	FBgn0036952	FBgn0035538	FBgn0031663						FBgn0038964
FBgn0031478	FBgn0036953	FBgn0035543	FBgn0031684						FBgn0038965
FBgn0031479	FBgn0036967	FBgn0035544	FBgn0031688						FBgn0038966
FBgn0031491	FBgn0036975	FBgn0035545	FBgn0031692						FBgn0038967
FBgn0031495	FBgn0036980	FBgn0035546	FBgn0031693						FBgn0038968
FBgn0031497	FBgn0036986	FBgn0035548	FBgn0031695						FBgn0038972
FBgn0031498	FBgn0036992	FBgn0035551	FBgn0031698						FBgn0038973
FBgn0031500	FBgn0037018	FBgn0035553	FBgn0031702						FBgn0038980
FBgn0031505	FBgn0037061	FBgn0035554	FBgn0031703						FBgn0038981
FBgn0031519	FBgn0037063	FBgn0035578	FBgn0031708						FBgn0038989
FBgn0031534	FBgn0037069	FBgn0035582	FBgn0031713						FBgn0039008
FBgn0031544	FBgn0037073	FBgn0035586	FBgn0031716						FBgn0039023
FBgn0031561	FBgn0037085	FBgn0035587	FBgn0031732						FBgn0039025
FBgn0031571	FBgn0037093	FBgn0035608	FBgn0031734						FBgn0039043
FBgn0031601	FBgn0037110	FBgn0035610	FBgn0031739						FBgn0039048
FBgn0031603	FBgn0037123	FBgn0035611	FBgn0031740						FBgn0039055
FBgn0031607	FBgn0037124	FBgn0035612	FBgn0031741						FBgn0039066
FBgn0031609	FBgn0037125	FBgn0035621	FBgn0031747						FBgn0039081
FBgn0031629	FBgn0037127	FBgn0035624	FBgn0031753						FBgn0039089
FBgn0031630	FBgn0037129	FBgn0035625	FBgn0031759						FBgn0039091
FBgn0031632	FBgn0037138	FBgn0035627	FBgn0031760						FBgn0039094
FBgn0031633	FBgn0037144	FBgn0035638	FBgn0031763						FBgn0039098
FBgn0031636	FBgn0037146	FBgn0035641	FBgn0031764						FBgn0039099
FBgn0031643	FBgn0037150	FBgn0035642	FBgn0031765						FBgn0039114
FBgn0031645	FBgn0037153	FBgn0035665	FBgn0031771						FBgn0039118
FBgn0031651	FBgn0037179	FBgn0035667	FBgn0031776						FBgn0039128
FBgn0031653	FBgn0037181	FBgn0035670	FBgn0031777						FBgn0039130
FBgn0031654	FBgn0037185	FBgn0035677	FBgn0031781						FBgn0039136
FBgn0031659	FBgn0037186	FBgn0035685	FBgn0031791						FBgn0039151
FBgn0031661	FBgn0037203	FBgn0035688	FBgn0031799						FBgn0039154
FBgn0031663	FBgn0037204	FBgn0035695	FBgn0031800						FBgn0039167
FBgn0031670	FBgn0037205	FBgn0035696	FBgn0031805						FBgn0039183
FBgn0031673	FBgn0037218	FBgn0035699	FBgn0031816						FBgn0039223
FBgn0031677	FBgn0037224	FBgn0035718	FBgn0031817						FBgn0039224
FBgn0031684	FBgn0037225	FBgn0035720	FBgn0031824						FBgn0039227
FBgn0031689	FBgn0037234	FBgn0035721	FBgn0031830						FBgn0039232
FBgn0031696	FBgn0037252	FBgn0035733	FBgn0031834						FBgn0039250
FBgn0031698	FBgn0037254	FBgn0035737	FBgn0031848						FBgn0039251
FBgn0031702	FBgn0037265	FBgn0035753	FBgn0031857						FBgn0039264
FBgn0031708	FBgn0037282	FBgn0035756	FBgn0031860						FBgn0039272
FBgn0031711	FBgn0037290	FBgn0035761	FBgn0031865						FBgn0039294
FBgn0031713	FBgn0037305	FBgn0035770	FBgn0031869						FBgn0039297
FBgn0031717	FBgn0037315	FBgn0035777	FBgn0031871						FBgn0039299
FBgn0031719	FBgn0037327	FBgn0035781	FBgn0031877						FBgn0039306
FBgn0031737	FBgn0037344	FBgn0035798	FBgn0031878						FBgn0039311
FBgn0031745	FBgn0037345	FBgn0035813	FBgn0031879						FBgn0039313
FBgn0031752	FBgn0037368	FBgn0035817	FBgn0031886						FBgn0039316
FBgn0031759	FBgn0037369	FBgn0035824	FBgn0031887						FBgn0039321
FBgn0031760	FBgn0037378	FBgn0035831	FBgn0031888						FBgn0039350
FBgn0031764	FBgn0037414	FBgn0035845	FBgn0031895						FBgn0039355
FBgn0031766	FBgn0037420	FBgn0035856	FBgn0031907						FBgn0039358
FBgn0031768	FBgn0037424	FBgn0035858	FBgn0031908						FBgn0039415
FBgn0031774	FBgn0037430	FBgn0035859	FBgn0031910						FBgn0039417
FBgn0031777	FBgn0037435	FBgn0035871	FBgn0031912						FBgn0039431
FBgn0031781	FBgn0037447	FBgn0035880	FBgn0031914						FBgn0039437
FBgn0031782	FBgn0037487	FBgn0035886	FBgn0031929						FBgn0039438
FBgn0031799	FBgn0037492	FBgn0035896	FBgn0031930						FBgn0039439
FBgn0031805	FBgn0037513	FBgn0035902	FBgn0031940						FBgn0039440
FBgn0031815	FBgn0037515	FBgn0035904	FBgn0031942						FBgn0039444
FBgn0031820	FBgn0037518	FBgn0035906	FBgn0031947						FBgn0039449
FBgn0031830	FBgn0037521	FBgn0035914	FBgn0031957						FBgn0039470
FBgn0031835	FBgn0037525	FBgn0035916	FBgn0031968						FBgn0039471
FBgn0031842	FBgn0037533	FBgn0035917	FBgn0031971						FBgn0039475
FBgn0031848	FBgn0037534	FBgn0035918	FBgn0031990						FBgn0039479
FBgn0031850	FBgn0037540	FBgn0035921	FBgn0031992						FBgn0039486
FBgn0031866	FBgn0037549	FBgn0035922	FBgn0031996						FBgn0039488
FBgn0031868	FBgn0037552	FBgn0035929	FBgn0032001						FBgn0039492
FBgn0031869	FBgn0037565	FBgn0035945	FBgn0032002						FBgn0039521
FBgn0031871	FBgn0037574	FBgn0035955	FBgn0032008						FBgn0039543
FBgn0031872	FBgn0037580	FBgn0035957	FBgn0032013						FBgn0039544
FBgn0031873	FBgn0037592	FBgn0035968	FBgn0032021						FBgn0039561
FBgn0031879	FBgn0037606	FBgn0035985	FBgn0032022						FBgn0039585
FBgn0031881	FBgn0037613	FBgn0035993	FBgn0032023						FBgn0039591
FBgn0031882	FBgn0037614	FBgn0035996	FBgn0032025						FBgn0039593
FBgn0031893	FBgn0037617	FBgn0036024	FBgn0032029						FBgn0039594
FBgn0031908	FBgn0037619	FBgn0036028	FBgn0032031						FBgn0039595
FBgn0031909	FBgn0037632	FBgn0036030	FBgn0032033						FBgn0039627
FBgn0031913	FBgn0037634	FBgn0036032	FBgn0032047						FBgn0039631
FBgn0031942	FBgn0037636	FBgn0036099	FBgn0032048						FBgn0039635
FBgn0031948	FBgn0037637	FBgn0036106	FBgn0032053						FBgn0039638
FBgn0031951	FBgn0037638	FBgn0036108	FBgn0032058						FBgn0039648
FBgn0031961	FBgn0037646	FBgn0036109	FBgn0032075						FBgn0039670
FBgn0031968	FBgn0037655	FBgn0036112	FBgn0032077						FBgn0039671
FBgn0031971	FBgn0037678	FBgn0036116	FBgn0032083						FBgn0039678
FBgn0031972	FBgn0037684	FBgn0036117	FBgn0032085						FBgn0039680
FBgn0031975	FBgn0037709	FBgn0036125	FBgn0032087						FBgn0039682
FBgn0031977	FBgn0037717	FBgn0036131	FBgn0032088						FBgn0039686
FBgn0031980	FBgn0037718	FBgn0036139	FBgn0032100						FBgn0039710
FBgn0031981	FBgn0037721	FBgn0036141	FBgn0032105						FBgn0039712
FBgn0031985	FBgn0037722	FBgn0036147	FBgn0032117						FBgn0039728
FBgn0031987	FBgn0037724	FBgn0036165	FBgn0032123						FBgn0039733
FBgn0031990	FBgn0037737	FBgn0036168	FBgn0032124						FBgn0039736
FBgn0031992	FBgn0037747	FBgn0036191	FBgn0032131						FBgn0039740
FBgn0031997	FBgn0037777	FBgn0036192	FBgn0032139						FBgn0039747
FBgn0031998	FBgn0037779	FBgn0036194	FBgn0032140						FBgn0039748
FBgn0032000	FBgn0037796	FBgn0036199	FBgn0032144						FBgn0039752
FBgn0032005	FBgn0037802	FBgn0036202	FBgn0032147						FBgn0039754
FBgn0032006	FBgn0037807	FBgn0036205	FBgn0032149						FBgn0039755
FBgn0032010	FBgn0037842	FBgn0036208	FBgn0032151						FBgn0039767
FBgn0032014	FBgn0037843	FBgn0036213	FBgn0032154						FBgn0039769
FBgn0032016	FBgn0037846	FBgn0036225	FBgn0032162						FBgn0039776
FBgn0032018	FBgn0037852	FBgn0036226	FBgn0032166						FBgn0039778
FBgn0032020	FBgn0037880	FBgn0036227	FBgn0032171						FBgn0039780
FBgn0032021	FBgn0037884	FBgn0036229	FBgn0032172						FBgn0039787
FBgn0032022	FBgn0037890	FBgn0036248	FBgn0032178						FBgn0039789
FBgn0032031	FBgn0037913	FBgn0036254	FBgn0032181						FBgn0039808
FBgn0032032	FBgn0037917	FBgn0036258	FBgn0032189						FBgn0039820
FBgn0032047	FBgn0037942	FBgn0036262	FBgn0032194						FBgn0039828
FBgn0032053	FBgn0037943	FBgn0036266	FBgn0032195						FBgn0039829
FBgn0032068	FBgn0037955	FBgn0036272	FBgn0032197						FBgn0039840
FBgn0032069	FBgn0037956	FBgn0036298	FBgn0032205						FBgn0039846
FBgn0032075	FBgn0037979	FBgn0036302	FBgn0032208						FBgn0039851
FBgn0032077	FBgn0037992	FBgn0036314	FBgn0032219						FBgn0039855
FBgn0032078	FBgn0037996	FBgn0036317	FBgn0032222						FBgn0039856
FBgn0032084	FBgn0038017	FBgn0036321	FBgn0032235						FBgn0039864
FBgn0032120	FBgn0038043	FBgn0036324	FBgn0032243						FBgn0039872
FBgn0032123	FBgn0038047	FBgn0036330	FBgn0032247						FBgn0039882
FBgn0032129	FBgn0038049	FBgn0036349	FBgn0032250						FBgn0039929
FBgn0032136	FBgn0038055	FBgn0036351	FBgn0032251						FBgn0039958
FBgn0032149	FBgn0038080	FBgn0036352	FBgn0032253						FBgn0039959
FBgn0032150	FBgn0038098	FBgn0036354	FBgn0032261						FBgn0039972
FBgn0032153	FBgn0038099	FBgn0036359	FBgn0032262						FBgn0039994
FBgn0032156	FBgn0038100	FBgn0036362	FBgn0032281						FBgn0040001
FBgn0032160	FBgn0038115	FBgn0036364	FBgn0032282						FBgn0040010
FBgn0032161	FBgn0038126	FBgn0036376	FBgn0032283						FBgn0040011
FBgn0032162	FBgn0038129	FBgn0036377	FBgn0032284						FBgn0040020
FBgn0032168	FBgn0038130	FBgn0036381	FBgn0032287						FBgn0040060
FBgn0032171	FBgn0038135	FBgn0036382	FBgn0032295						FBgn0040064
FBgn0032191	FBgn0038136	FBgn0036390	FBgn0032298						FBgn0040069
FBgn0032195	FBgn0038147	FBgn0036391	FBgn0032299						FBgn0040080
FBgn0032196	FBgn0038148	FBgn0036393	FBgn0032304						FBgn0040091
FBgn0032202	FBgn0038181	FBgn0036395	FBgn0032322						FBgn0040104
FBgn0032204	FBgn0038190	FBgn0036410	FBgn0032336						FBgn0040232
FBgn0032208	FBgn0038191	FBgn0036422	FBgn0032341						FBgn0040235
FBgn0032213	FBgn0038197	FBgn0036437	FBgn0032343						FBgn0040238
FBgn0032214	FBgn0038206	FBgn0036454	FBgn0032350						FBgn0040255
FBgn0032218	FBgn0038223	FBgn0036459	FBgn0032354						FBgn0040260
FBgn0032222	FBgn0038243	FBgn0036461	FBgn0032362						FBgn0040262
FBgn0032223	FBgn0038252	FBgn0036466	FBgn0032374						FBgn0040273
FBgn0032224	FBgn0038261	FBgn0036467	FBgn0032381						FBgn0040284
FBgn0032231	FBgn0038262	FBgn0036468	FBgn0032393						FBgn0040299
FBgn0032235	FBgn0038269	FBgn0036469	FBgn0032399						FBgn0040309
FBgn0032236	FBgn0038277	FBgn0036470	FBgn0032402						FBgn0040319
FBgn0032243	FBgn0038294	FBgn0036476	FBgn0032405						FBgn0040350
FBgn0032246	FBgn0038302	FBgn0036484	FBgn0032407						FBgn0040359
FBgn0032247	FBgn0038303	FBgn0036489	FBgn0032408						FBgn0040377
FBgn0032248	FBgn0038304	FBgn0036494	FBgn0032409						FBgn0040383
FBgn0032252	FBgn0038316	FBgn0036500	FBgn0032414						FBgn0040388
FBgn0032261	FBgn0038332	FBgn0036501	FBgn0032422						FBgn0040465
FBgn0032282	FBgn0038371	FBgn0036502	FBgn0032430						FBgn0040503
FBgn0032283	FBgn0038387	FBgn0036534	FBgn0032433						FBgn0040507
FBgn0032284	FBgn0038395	FBgn0036536	FBgn0032437						FBgn0040529
FBgn0032292	FBgn0038400	FBgn0036544	FBgn0032442						FBgn0040532
FBgn0032297	FBgn0038407	FBgn0036546	FBgn0032444						FBgn0040553
FBgn0032304	FBgn0038419	FBgn0036547	FBgn0032449						FBgn0040571
FBgn0032305	FBgn0038420	FBgn0036556	FBgn0032450						FBgn0040600
FBgn0032322	FBgn0038429	FBgn0036563	FBgn0032453						FBgn0040606
FBgn0032330	FBgn0038432	FBgn0036576	FBgn0032454						FBgn0040609
FBgn0032340	FBgn0038446	FBgn0036589	FBgn0032457						FBgn0040717
FBgn0032346	FBgn0038462	FBgn0036593	FBgn0032472						FBgn0040723
FBgn0032348	FBgn0038466	FBgn0036594	FBgn0032475						FBgn0040736
FBgn0032350	FBgn0038470	FBgn0036595	FBgn0032476						FBgn0040817
FBgn0032358	FBgn0038478	FBgn0036597	FBgn0032484						FBgn0040823
FBgn0032363	FBgn0038487	FBgn0036598	FBgn0032486						FBgn0040827
FBgn0032373	FBgn0038490	FBgn0036600	FBgn0032487						FBgn0040832
FBgn0032374	FBgn0038504	FBgn0036606	FBgn0032489						FBgn0040842
FBgn0032382	FBgn0038515	FBgn0036607	FBgn0032509						FBgn0040923
FBgn0032390	FBgn0038535	FBgn0036620	FBgn0032511						FBgn0040950
FBgn0032395	FBgn0038547	FBgn0036638	FBgn0032513						FBgn0041004
FBgn0032401	FBgn0038566	FBgn0036639	FBgn0032514						FBgn0041087
FBgn0032407	FBgn0038577	FBgn0036646	FBgn0032517						FBgn0041160
FBgn0032420	FBgn0038581	FBgn0036659	FBgn0032518						FBgn0041171
FBgn0032421	FBgn0038588	FBgn0036665	FBgn0032521						FBgn0041182
FBgn0032422	FBgn0038609	FBgn0036670	FBgn0032538						FBgn0041194
FBgn0032433	FBgn0038610	FBgn0036678	FBgn0032587						FBgn0041205
FBgn0032444	FBgn0038613	FBgn0036680	FBgn0032598						FBgn0041337
FBgn0032451	FBgn0038617	FBgn0036686	FBgn0032603						FBgn0041604
FBgn0032452	FBgn0038619	FBgn0036689	FBgn0032614						FBgn0041629
FBgn0032453	FBgn0038643	FBgn0036717	FBgn0032615						FBgn0041702
FBgn0032454	FBgn0038645	FBgn0036725	FBgn0032629						FBgn0041712
FBgn0032456	FBgn0038646	FBgn0036733	FBgn0032631						FBgn0041775
FBgn0032467	FBgn0038647	FBgn0036746	FBgn0032633						FBgn0042092
FBgn0032474	FBgn0038649	FBgn0036756	FBgn0032635						FBgn0042094
FBgn0032481	FBgn0038658	FBgn0036759	FBgn0032642						FBgn0042104
FBgn0032486	FBgn0038700	FBgn0036777	FBgn0032646						FBgn0042177
FBgn0032487	FBgn0038701	FBgn0036781	FBgn0032656						FBgn0042205
FBgn0032488	FBgn0038723	FBgn0036806	FBgn0032663						FBgn0042206
FBgn0032489	FBgn0038733	FBgn0036811	FBgn0032665						FBgn0042627
FBgn0032509	FBgn0038740	FBgn0036814	FBgn0032669						FBgn0043001
FBgn0032511	FBgn0038745	FBgn0036825	FBgn0032670						FBgn0043002
FBgn0032515	FBgn0038747	FBgn0036827	FBgn0032681						FBgn0043364
FBgn0032517	FBgn0038769	FBgn0036850	FBgn0032683						FBgn0043470
FBgn0032518	FBgn0038774	FBgn0036851	FBgn0032684						FBgn0043550
FBgn0032524	FBgn0038799	FBgn0036857	FBgn0032685						FBgn0043575
FBgn0032538	FBgn0038839	FBgn0036870	FBgn0032693						FBgn0043792
FBgn0032596	FBgn0038845	FBgn0036878	FBgn0032698						FBgn0043854
FBgn0032597	FBgn0038853	FBgn0036879	FBgn0032705						FBgn0043900
FBgn0032600	FBgn0038854	FBgn0036887	FBgn0032707						FBgn0043903
FBgn0032633	FBgn0038858	FBgn0036899	FBgn0032713						FBgn0044049
FBgn0032634	FBgn0038877	FBgn0036920	FBgn0032715						FBgn0044324
FBgn0032640	FBgn0038912	FBgn0036927	FBgn0032717						FBgn0044823
FBgn0032642	FBgn0038919	FBgn0036934	FBgn0032720						FBgn0046214
FBgn0032644	FBgn0038922	FBgn0036935	FBgn0032721						FBgn0046247
FBgn0032646	FBgn0038924	FBgn0036940	FBgn0032723						FBgn0046687
FBgn0032668	FBgn0038934	FBgn0036947	FBgn0032729						FBgn0046706
FBgn0032681	FBgn0038950	FBgn0036948	FBgn0032744						FBgn0046776
FBgn0032683	FBgn0038961	FBgn0036949	FBgn0032746						FBgn0046875
FBgn0032685	FBgn0038965	FBgn0036951	FBgn0032748						FBgn0046876
FBgn0032698	FBgn0038966	FBgn0036952	FBgn0032750						FBgn0046879
FBgn0032700	FBgn0038973	FBgn0036953	FBgn0032770						FBgn0047199
FBgn0032701	FBgn0038974	FBgn0036959	FBgn0032774						FBgn0050009
FBgn0032703	FBgn0038975	FBgn0036975	FBgn0032782						FBgn0050020
FBgn0032705	FBgn0038983	FBgn0036979	FBgn0032787						FBgn0050025
FBgn0032715	FBgn0038986	FBgn0036985	FBgn0032790						FBgn0050043
FBgn0032717	FBgn0038989	FBgn0036992	FBgn0032793						FBgn0050047
FBgn0032723	FBgn0039051	FBgn0036993	FBgn0032796						FBgn0050049
FBgn0032726	FBgn0039054	FBgn0036997	FBgn0032797						FBgn0050052
FBgn0032730	FBgn0039055	FBgn0037000	FBgn0032801						FBgn0050085
FBgn0032732	FBgn0039068	FBgn0037012	FBgn0032803						FBgn0050118
FBgn0032744	FBgn0039069	FBgn0037019	FBgn0032805						FBgn0050148
FBgn0032746	FBgn0039081	FBgn0037025	FBgn0032810						FBgn0050265
FBgn0032748	FBgn0039094	FBgn0037028	FBgn0032813						FBgn0050339
FBgn0032750	FBgn0039126	FBgn0037044	FBgn0032819						FBgn0050344
FBgn0032773	FBgn0039135	FBgn0037050	FBgn0032820						FBgn0050349
FBgn0032774	FBgn0039152	FBgn0037068	FBgn0032821						FBgn0050359
FBgn0032779	FBgn0039156	FBgn0037069	FBgn0032824						FBgn0050377
FBgn0032782	FBgn0039175	FBgn0037082	FBgn0032833						FBgn0050390
FBgn0032787	FBgn0039201	FBgn0037090	FBgn0032835						FBgn0050410
FBgn0032796	FBgn0039205	FBgn0037099	FBgn0032839						FBgn0050413
FBgn0032797	FBgn0039207	FBgn0037106	FBgn0032840						FBgn0050457
FBgn0032798	FBgn0039214	FBgn0037107	FBgn0032849						FBgn0050476
FBgn0032801	FBgn0039219	FBgn0037117	FBgn0032856						FBgn0050485
FBgn0032812	FBgn0039223	FBgn0037122	FBgn0032857						FBgn0050493
FBgn0032815	FBgn0039229	FBgn0037123	FBgn0032860						FBgn0051002
FBgn0032816	FBgn0039240	FBgn0037124	FBgn0032864						FBgn0051028
FBgn0032817	FBgn0039251	FBgn0037125	FBgn0032876						FBgn0051041
FBgn0032821	FBgn0039258	FBgn0037126	FBgn0032877						FBgn0051072
FBgn0032822	FBgn0039272	FBgn0037127	FBgn0032889						FBgn0051080
FBgn0032849	FBgn0039290	FBgn0037128	FBgn0032897						FBgn0051087
FBgn0032858	FBgn0039293	FBgn0037129	FBgn0032899						FBgn0051097
FBgn0032864	FBgn0039296	FBgn0037135	FBgn0032900						FBgn0051106
FBgn0032870	FBgn0039297	FBgn0037138	FBgn0032901						FBgn0051108
FBgn0032871	FBgn0039311	FBgn0037140	FBgn0032907						FBgn0051116
FBgn0032877	FBgn0039332	FBgn0037141	FBgn0032908						FBgn0051155
FBgn0032884	FBgn0039337	FBgn0037150	FBgn0032913						FBgn0051156
FBgn0032891	FBgn0039343	FBgn0037153	FBgn0032921						FBgn0051163
FBgn0032897	FBgn0039355	FBgn0037164	FBgn0032922						FBgn0051183
FBgn0032899	FBgn0039356	FBgn0037166	FBgn0032929						FBgn0051191
FBgn0032901	FBgn0039380	FBgn0037174	FBgn0032934						FBgn0051201
FBgn0032906	FBgn0039411	FBgn0037176	FBgn0032938						FBgn0051221
FBgn0032921	FBgn0039417	FBgn0037177	FBgn0032945						FBgn0051233
FBgn0032922	FBgn0039419	FBgn0037179	FBgn0032957						FBgn0051235
FBgn0032940	FBgn0039430	FBgn0037181	FBgn0032987						FBgn0051266
FBgn0032946	FBgn0039434	FBgn0037203	FBgn0033000						FBgn0051268
FBgn0032957	FBgn0039435	FBgn0037204	FBgn0033021						FBgn0051272
FBgn0032987	FBgn0039436	FBgn0037220	FBgn0033031						FBgn0051288
FBgn0032988	FBgn0039437	FBgn0037227	FBgn0033047						FBgn0051313
FBgn0033000	FBgn0039441	FBgn0037228	FBgn0033048						FBgn0051324
FBgn0033010	FBgn0039444	FBgn0037236	FBgn0033054						FBgn0051343
FBgn0033033	FBgn0039449	FBgn0037238	FBgn0033060						FBgn0051344
FBgn0033052	FBgn0039453	FBgn0037248	FBgn0033061						FBgn0051363
FBgn0033055	FBgn0039461	FBgn0037249	FBgn0033062						FBgn0051439
FBgn0033060	FBgn0039469	FBgn0037252	FBgn0033065						FBgn0051445
FBgn0033062	FBgn0039470	FBgn0037255	FBgn0033081						FBgn0051453
FBgn0033075	FBgn0039492	FBgn0037275	FBgn0033085						FBgn0051454
FBgn0033079	FBgn0039532	FBgn0037323	FBgn0033086						FBgn0051464
FBgn0033081	FBgn0039537	FBgn0037326	FBgn0033088						FBgn0051496
FBgn0033085	FBgn0039538	FBgn0037328	FBgn0033093						FBgn0051559
FBgn0033088	FBgn0039543	FBgn0037350	FBgn0033100						FBgn0051561
FBgn0033089	FBgn0039544	FBgn0037354	FBgn0033101						FBgn0051663
FBgn0033092	FBgn0039564	FBgn0037359	FBgn0033115						FBgn0051683
FBgn0033100	FBgn0039584	FBgn0037363	FBgn0033124						FBgn0051760
FBgn0033101	FBgn0039585	FBgn0037369	FBgn0033127						FBgn0051777
FBgn0033108	FBgn0039594	FBgn0037372	FBgn0033128						FBgn0051781
FBgn0033121	FBgn0039602	FBgn0037375	FBgn0033132						FBgn0051789
FBgn0033127	FBgn0039631	FBgn0037376	FBgn0033134						FBgn0051792
FBgn0033128	FBgn0039635	FBgn0037382	FBgn0033138						FBgn0051813
FBgn0033159	FBgn0039638	FBgn0037386	FBgn0033139						FBgn0051849
FBgn0033162	FBgn0039640	FBgn0037387	FBgn0033153						FBgn0051864
FBgn0033166	FBgn0039644	FBgn0037408	FBgn0033155						FBgn0051875
FBgn0033178	FBgn0039664	FBgn0037409	FBgn0033158						FBgn0051898
FBgn0033179	FBgn0039668	FBgn0037413	FBgn0033159						FBgn0051915
FBgn0033184	FBgn0039670	FBgn0037414	FBgn0033162						FBgn0051974
FBgn0033188	FBgn0039678	FBgn0037416	FBgn0033177						FBgn0052029
FBgn0033194	FBgn0039682	FBgn0037419	FBgn0033179						FBgn0052036
FBgn0033199	FBgn0039689	FBgn0037420	FBgn0033184						FBgn0052068
FBgn0033205	FBgn0039702	FBgn0037421	FBgn0033190						FBgn0052073
FBgn0033208	FBgn0039714	FBgn0037424	FBgn0033191						FBgn0052091
FBgn0033209	FBgn0039719	FBgn0037427	FBgn0033195						FBgn0052104
FBgn0033212	FBgn0039728	FBgn0037428	FBgn0033203						FBgn0052170
FBgn0033229	FBgn0039736	FBgn0037429	FBgn0033204						FBgn0052188
FBgn0033235	FBgn0039738	FBgn0037430	FBgn0033207						FBgn0052189
FBgn0033241	FBgn0039741	FBgn0037433	FBgn0033208						FBgn0052198
FBgn0033246	FBgn0039754	FBgn0037445	FBgn0033209						FBgn0052206
FBgn0033247	FBgn0039766	FBgn0037446	FBgn0033210						FBgn0052207
FBgn0033250	FBgn0039768	FBgn0037447	FBgn0033212						FBgn0052214
FBgn0033252	FBgn0039769	FBgn0037448	FBgn0033214						FBgn0052241
FBgn0033261	FBgn0039777	FBgn0037468	FBgn0033221						FBgn0052344
FBgn0033268	FBgn0039778	FBgn0037470	FBgn0033233						FBgn0052354
FBgn0033273	FBgn0039790	FBgn0037472	FBgn0033234						FBgn0052365
FBgn0033294	FBgn0039800	FBgn0037481	FBgn0033235						FBgn0052425
FBgn0033309	FBgn0039844	FBgn0037487	FBgn0033236						FBgn0052483
FBgn0033313	FBgn0039856	FBgn0037517	FBgn0033243						FBgn0052537
FBgn0033315	FBgn0039858	FBgn0037518	FBgn0033249						FBgn0052564
FBgn0033317	FBgn0039863	FBgn0037525	FBgn0033252						FBgn0052570
FBgn0033339	FBgn0039869	FBgn0037529	FBgn0033268						FBgn0052574
FBgn0033340	FBgn0039872	FBgn0037537	FBgn0033275						FBgn0052600
FBgn0033341	FBgn0039886	FBgn0037538	FBgn0033292						FBgn0052603
FBgn0033348	FBgn0039890	FBgn0037548	FBgn0033294						FBgn0052625
FBgn0033350	FBgn0039896	FBgn0037549	FBgn0033302						FBgn0052645
FBgn0033351	FBgn0039897	FBgn0037552	FBgn0033313						FBgn0052656
FBgn0033357	FBgn0039904	FBgn0037553	FBgn0033317						FBgn0052669
FBgn0033367	FBgn0039907	FBgn0037563	FBgn0033321						FBgn0052683
FBgn0033375	FBgn0039915	FBgn0037601	FBgn0033327						FBgn0052687
FBgn0033378	FBgn0039920	FBgn0037621	FBgn0033339						FBgn0052750
FBgn0033379	FBgn0039923	FBgn0037636	FBgn0033347						FBgn0052831
FBgn0033381	FBgn0039928	FBgn0037638	FBgn0033351						FBgn0052843
FBgn0033413	FBgn0039932	FBgn0037648	FBgn0033352						FBgn0052855
FBgn0033421	FBgn0039936	FBgn0037655	FBgn0033354						FBgn0053012
FBgn0033428	FBgn0039938	FBgn0037660	FBgn0033355						FBgn0053013
FBgn0033429	FBgn0039944	FBgn0037661	FBgn0033357						FBgn0053082
FBgn0033431	FBgn0039958	FBgn0037664	FBgn0033358						FBgn0053099
FBgn0033446	FBgn0039959	FBgn0037669	FBgn0033359						FBgn0053100
FBgn0033448	FBgn0039966	FBgn0037678	FBgn0033362						FBgn0053120
FBgn0033450	FBgn0039972	FBgn0037683	FBgn0033365						FBgn0053124
FBgn0033451	FBgn0039977	FBgn0037686	FBgn0033367						FBgn0053127
FBgn0033457	FBgn0039994	FBgn0037690	FBgn0033372						FBgn0053128
FBgn0033460	FBgn0040001	FBgn0037696	FBgn0033373						FBgn0053138
FBgn0033467	FBgn0040011	FBgn0037698	FBgn0033374						FBgn0053160
FBgn0033471	FBgn0040022	FBgn0037705	FBgn0033375						FBgn0053179
FBgn0033473	FBgn0040056	FBgn0037713	FBgn0033377						FBgn0053202
FBgn0033479	FBgn0040060	FBgn0037717	FBgn0033379						FBgn0053302
FBgn0033480	FBgn0040070	FBgn0037724	FBgn0033387						FBgn0053346
FBgn0033482	FBgn0040071	FBgn0037730	FBgn0033397						FBgn0053489
FBgn0033483	FBgn0040233	FBgn0037746	FBgn0033408						FBgn0053494
FBgn0033484	FBgn0040259	FBgn0037750	FBgn0033421						FBgn0053505
FBgn0033504	FBgn0040260	FBgn0037754	FBgn0033428						FBgn0053506
FBgn0033528	FBgn0040279	FBgn0037756	FBgn0033429						FBgn0053511
FBgn0033540	FBgn0040285	FBgn0037760	FBgn0033437						FBgn0053514
FBgn0033541	FBgn0040309	FBgn0037766	FBgn0033438						FBgn0053517
FBgn0033547	FBgn0040319	FBgn0037780	FBgn0033439						FBgn0053970
FBgn0033548	FBgn0040324	FBgn0037782	FBgn0033443						FBgn0053993
FBgn0033549	FBgn0040336	FBgn0037794	FBgn0033446						FBgn0054003
FBgn0033554	FBgn0040350	FBgn0037801	FBgn0033447						FBgn0054007
FBgn0033555	FBgn0040364	FBgn0037807	FBgn0033448						FBgn0054038
FBgn0033556	FBgn0040366	FBgn0037819	FBgn0033453						FBgn0054043
FBgn0033564	FBgn0040370	FBgn0037822	FBgn0033454						FBgn0054054
FBgn0033598	FBgn0040383	FBgn0037831	FBgn0033458						FBgn0054056
FBgn0033605	FBgn0040384	FBgn0037836	FBgn0033459						FBgn0058198
FBgn0033608	FBgn0040393	FBgn0037837	FBgn0033464						FBgn0061469
FBgn0033624	FBgn0040396	FBgn0037842	FBgn0033465						FBgn0061476
FBgn0033635	FBgn0040475	FBgn0037844	FBgn0033475						FBgn0061492
FBgn0033636	FBgn0040477	FBgn0037852	FBgn0033480						FBgn0062412
FBgn0033649	FBgn0040487	FBgn0037853	FBgn0033481						FBgn0063485
FBgn0033652	FBgn0040493	FBgn0037874	FBgn0033485						FBgn0063495
FBgn0033661	FBgn0040551	FBgn0037878	FBgn0033491						FBgn0063498
FBgn0033668	FBgn0040602	FBgn0037881	FBgn0033519						FBgn0067629
FBgn0033669	FBgn0040609	FBgn0037884	FBgn0033524						FBgn0082585
FBgn0033672	FBgn0040650	FBgn0037890	FBgn0033539						FBgn0083027
FBgn0033677	FBgn0040717	FBgn0037899	FBgn0033540						FBgn0083124
FBgn0033679	FBgn0040752	FBgn0037930	FBgn0033541						FBgn0083951
FBgn0033683	FBgn0040799	FBgn0037935	FBgn0033547						FBgn0083972
FBgn0033685	FBgn0040809	FBgn0037940	FBgn0033548						FBgn0085188
FBgn0033686	FBgn0040823	FBgn0037941	FBgn0033549						FBgn0085192
FBgn0033688	FBgn0040827	FBgn0037943	FBgn0033551						FBgn0085205
FBgn0033690	FBgn0040842	FBgn0037958	FBgn0033557						FBgn0085244
FBgn0033699	FBgn0040890	FBgn0037978	FBgn0033570						FBgn0085245
FBgn0033712	FBgn0040899	FBgn0037989	FBgn0033571						FBgn0085261
FBgn0033715	FBgn0040928	FBgn0037992	FBgn0033573						FBgn0085280
FBgn0033721	FBgn0040942	FBgn0037996	FBgn0033581						FBgn0085300
FBgn0033734	FBgn0040950	FBgn0037999	FBgn0033584						FBgn0085305
FBgn0033748	FBgn0040964	FBgn0038009	FBgn0033590						FBgn0085307
FBgn0033751	FBgn0040985	FBgn0038012	FBgn0033591						FBgn0085313
FBgn0033761	FBgn0041094	FBgn0038013	FBgn0033594						FBgn0085334
FBgn0033766	FBgn0041111	FBgn0038017	FBgn0033597						FBgn0085354
FBgn0033769	FBgn0041147	FBgn0038020	FBgn0033600						FBgn0085386
FBgn0033781	FBgn0041150	FBgn0038037	FBgn0033603						FBgn0085391
FBgn0033782	FBgn0041203	FBgn0038051	FBgn0033605						FBgn0085411
FBgn0033787	FBgn0041604	FBgn0038056	FBgn0033608						FBgn0085414
FBgn0033788	FBgn0041605	FBgn0038058	FBgn0033629						FBgn0085415
FBgn0033806	FBgn0041627	FBgn0038063	FBgn0033631						FBgn0085455
FBgn0033808	FBgn0041629	FBgn0038070	FBgn0033636						FBgn0085456
FBgn0033810	FBgn0041775	FBgn0038073	FBgn0033639						FBgn0085732
FBgn0033812	FBgn0042083	FBgn0038074	FBgn0033645						FBgn0085736
FBgn0033813	FBgn0042092	FBgn0038084	FBgn0033652						FBgn0085799
FBgn0033816	FBgn0042094	FBgn0038087	FBgn0033658						FBgn0086253
FBgn0033842	FBgn0042104	FBgn0038100	FBgn0033659						FBgn0086350
FBgn0033855	FBgn0042127	FBgn0038130	FBgn0033661						FBgn0086356
FBgn0033871	FBgn0042135	FBgn0038132	FBgn0033665						FBgn0086362
FBgn0033872	FBgn0042138	FBgn0038135	FBgn0033683						FBgn0086365
FBgn0033876	FBgn0042174	FBgn0038136	FBgn0033686						FBgn0086368
FBgn0033883	FBgn0042180	FBgn0038148	FBgn0033688						FBgn0086447
FBgn0033889	FBgn0042185	FBgn0038153	FBgn0033690						FBgn0086558
FBgn0033897	FBgn0042199	FBgn0038160	FBgn0033696						FBgn0086677
FBgn0033903	FBgn0043362	FBgn0038161	FBgn0033699						FBgn0086683
FBgn0033907	FBgn0043364	FBgn0038165	FBgn0033708						FBgn0086687
FBgn0033912	FBgn0043471	FBgn0038181	FBgn0033713						FBgn0086711
FBgn0033913	FBgn0043575	FBgn0038190	FBgn0033720						FBgn0086778
FBgn0033917	FBgn0043792	FBgn0038197	FBgn0033721						FBgn0086895
FBgn0033919	FBgn0043806	FBgn0038198	FBgn0033724						FBgn0086899
FBgn0033925	FBgn0043841	FBgn0038202	FBgn0033726						FBgn0086908
FBgn0033926	FBgn0043884	FBgn0038207	FBgn0033729						FBgn0087011
FBgn0033934	FBgn0043900	FBgn0038237	FBgn0033734						FBgn0087021
FBgn0033958	FBgn0044510	FBgn0038251	FBgn0033735						FBgn0087040
FBgn0033960	FBgn0044823	FBgn0038260	FBgn0033739						FBgn0250732
FBgn0033961	FBgn0046214	FBgn0038274	FBgn0033740						FBgn0250757
FBgn0033968	FBgn0046302	FBgn0038277	FBgn0033742						FBgn0250815
FBgn0033972	FBgn0046692	FBgn0038279	FBgn0033744						FBgn0250816
FBgn0033984	FBgn0046704	FBgn0038282	FBgn0033752						FBgn0250833
FBgn0033987	FBgn0046706	FBgn0038294	FBgn0033753						FBgn0250836
FBgn0033998	FBgn0046875	FBgn0038295	FBgn0033754						FBgn0250839
FBgn0034000	FBgn0050005	FBgn0038296	FBgn0033757						FBgn0250848
FBgn0034001	FBgn0050009	FBgn0038300	FBgn0033760						FBgn0250862
FBgn0034002	FBgn0050011	FBgn0038303	FBgn0033761						FBgn0250908
FBgn0034008	FBgn0050020	FBgn0038306	FBgn0033766						FBgn0250910
FBgn0034009	FBgn0050043	FBgn0038315	FBgn0033773						FBgn0259101
FBgn0034010	FBgn0050046	FBgn0038320	FBgn0033775						FBgn0259140
FBgn0034011	FBgn0050081	FBgn0038331	FBgn0033788						FBgn0259192
FBgn0034013	FBgn0050101	FBgn0038339	FBgn0033789						FBgn0259212
FBgn0034027	FBgn0050106	FBgn0038349	FBgn0033791						FBgn0259226
FBgn0034029	FBgn0050109	FBgn0038354	FBgn0033793						FBgn0259245
FBgn0034033	FBgn0050159	FBgn0038381	FBgn0033802						FBgn0259247
FBgn0034049	FBgn0050185	FBgn0038388	FBgn0033806						FBgn0259697
FBgn0034050	FBgn0050381	FBgn0038395	FBgn0033807						FBgn0259745
FBgn0034057	FBgn0050392	FBgn0038405	FBgn0033808						FBgn0259791
FBgn0034058	FBgn0050413	FBgn0038416	FBgn0033810						FBgn0259896
FBgn0034059	FBgn0050428	FBgn0038419	FBgn0033812						FBgn0259916
FBgn0034060	FBgn0050457	FBgn0038420	FBgn0033813						FBgn0259927
FBgn0034061	FBgn0050458	FBgn0038422	FBgn0033816						FBgn0259936
FBgn0034065	FBgn0050485	FBgn0038424	FBgn0033817						FBgn0259937
FBgn0034066	FBgn0051004	FBgn0038439	FBgn0033826						FBgn0259978
FBgn0034070	FBgn0051028	FBgn0038449	FBgn0033827						FBgn0259993
FBgn0034071	FBgn0051030	FBgn0038450	FBgn0033830						FBgn0259998
FBgn0034072	FBgn0051032	FBgn0038455	FBgn0033845						FBgn0260011
FBgn0034073	FBgn0051053	FBgn0038460	FBgn0033855						FBgn0260049
FBgn0034075	FBgn0051072	FBgn0038462	FBgn0033869						FBgn0260386
FBgn0034081	FBgn0051075	FBgn0038466	FBgn0033871						FBgn0260393
FBgn0034083	FBgn0051098	FBgn0038472	FBgn0033875						FBgn0260399
FBgn0034084	FBgn0051108	FBgn0038481	FBgn0033879						FBgn0260450
FBgn0034086	FBgn0051115	FBgn0038532	FBgn0033889						FBgn0260456
FBgn0034087	FBgn0051126	FBgn0038542	FBgn0033891						FBgn0260462
FBgn0034110	FBgn0051133	FBgn0038564	FBgn0033897						FBgn0260648
FBgn0034126	FBgn0051140	FBgn0038575	FBgn0033900						FBgn0260657
FBgn0034138	FBgn0051163	FBgn0038588	FBgn0033903						FBgn0260744
FBgn0034142	FBgn0051198	FBgn0038593	FBgn0033904						FBgn0260746
FBgn0034145	FBgn0051216	FBgn0038596	FBgn0033906						FBgn0260747
FBgn0034158	FBgn0051224	FBgn0038601	FBgn0033907						FBgn0260749
FBgn0034180	FBgn0051229	FBgn0038606	FBgn0033912						FBgn0260780
FBgn0034194	FBgn0051233	FBgn0038610	FBgn0033921						FBgn0260799
FBgn0034204	FBgn0051249	FBgn0038613	FBgn0033936						FBgn0260874
FBgn0034215	FBgn0051262	FBgn0038629	FBgn0033960						FBgn0260943
FBgn0034231	FBgn0051266	FBgn0038641	FBgn0033961						FBgn0260986
FBgn0034232	FBgn0051313	FBgn0038643	FBgn0033968						FBgn0260987
FBgn0034240	FBgn0051321	FBgn0038645	FBgn0033970						FBgn0260991
FBgn0034242	FBgn0051343	FBgn0038646	FBgn0033972						FBgn0261004
FBgn0034245	FBgn0051390	FBgn0038647	FBgn0033978						FBgn0261016
FBgn0034246	FBgn0051439	FBgn0038653	FBgn0033979						FBgn0261046
FBgn0034249	FBgn0051451	FBgn0038658	FBgn0033981						FBgn0261068
FBgn0034253	FBgn0051472	FBgn0038659	FBgn0033982						FBgn0261085
FBgn0034255	FBgn0051481	FBgn0038660	FBgn0033988						FBgn0261113
FBgn0034259	FBgn0051510	FBgn0038672	FBgn0033989						FBgn0261238
FBgn0034275	FBgn0051547	FBgn0038673	FBgn0033990						FBgn0261258
FBgn0034276	FBgn0051548	FBgn0038676	FBgn0033993						FBgn0261262
FBgn0034288	FBgn0051601	FBgn0038693	FBgn0033999						FBgn0261266
FBgn0034289	FBgn0051619	FBgn0038700	FBgn0034001						FBgn0261276
FBgn0034290	FBgn0051635	FBgn0038701	FBgn0034002						FBgn0261283
FBgn0034292	FBgn0051637	FBgn0038725	FBgn0034009						FBgn0261362
FBgn0034295	FBgn0051642	FBgn0038733	FBgn0034010						FBgn0261380
FBgn0034299	FBgn0051648	FBgn0038734	FBgn0034011						FBgn0261385
FBgn0034300	FBgn0051665	FBgn0038740	FBgn0034021						FBgn0261393
FBgn0034312	FBgn0051679	FBgn0038774	FBgn0034022						FBgn0261456
FBgn0034314	FBgn0051683	FBgn0038784	FBgn0034027						FBgn0261479
FBgn0034335	FBgn0051687	FBgn0038795	FBgn0034031						FBgn0261526
FBgn0034345	FBgn0051712	FBgn0038799	FBgn0034033						FBgn0261535
FBgn0034354	FBgn0051716	FBgn0038804	FBgn0034045						FBgn0261547
FBgn0034356	FBgn0051717	FBgn0038819	FBgn0034049						FBgn0261563
FBgn0034361	FBgn0051721	FBgn0038826	FBgn0034053						FBgn0261564
FBgn0034362	FBgn0051729	FBgn0038839	FBgn0034058						FBgn0261617
FBgn0034365	FBgn0051759	FBgn0038842	FBgn0034059						FBgn0261625
FBgn0034371	FBgn0051781	FBgn0038845	FBgn0034061						FBgn0261647
FBgn0034394	FBgn0051784	FBgn0038852	FBgn0034065						FBgn0261649
FBgn0034398	FBgn0051792	FBgn0038854	FBgn0034072						FBgn0261705
FBgn0034399	FBgn0051793	FBgn0038865	FBgn0034093						FBgn0261811
FBgn0034400	FBgn0051813	FBgn0038866	FBgn0034098						FBgn0261847
FBgn0034402	FBgn0051875	FBgn0038873	FBgn0034114						FBgn0261862
FBgn0034405	FBgn0051897	FBgn0038880	FBgn0034117						FBgn0261871
FBgn0034406	FBgn0051898	FBgn0038934	FBgn0034126						FBgn0261955
FBgn0034408	FBgn0051992	FBgn0038938	FBgn0034131						FBgn0261987
FBgn0034430	FBgn0051997	FBgn0038946	FBgn0034136						FBgn0261989
FBgn0034436	FBgn0051998	FBgn0038948	FBgn0034137						FBgn0261990
FBgn0034451	FBgn0051999	FBgn0038958	FBgn0034140						FBgn0261995
FBgn0034455	FBgn0052000	FBgn0038965	FBgn0034142						FBgn0261997
FBgn0034470	FBgn0052016	FBgn0038966	FBgn0034145						FBgn0262001
FBgn0034476	FBgn0052027	FBgn0038973	FBgn0034158						FBgn0262005
FBgn0034479	FBgn0052062	FBgn0038975	FBgn0034159						FBgn0262018
FBgn0034490	FBgn0052073	FBgn0038977	FBgn0034160						FBgn0262029
FBgn0034491	FBgn0052076	FBgn0038980	FBgn0034162						FBgn0262111
FBgn0034493	FBgn0052082	FBgn0038983	FBgn0034166						FBgn0262169
FBgn0034495	FBgn0052088	FBgn0038986	FBgn0034187						FBgn0262473
FBgn0034497	FBgn0052099	FBgn0039008	FBgn0034194						FBgn0262508
FBgn0034498	FBgn0052109	FBgn0039023	FBgn0034197						FBgn0262511
FBgn0034501	FBgn0052112	FBgn0039024	FBgn0034200						FBgn0262519
FBgn0034503	FBgn0052150	FBgn0039025	FBgn0034201						FBgn0262531
FBgn0034523	FBgn0052187	FBgn0039031	FBgn0034204						FBgn0262559
FBgn0034529	FBgn0052189	FBgn0039039	FBgn0034214						FBgn0262608
FBgn0034534	FBgn0052195	FBgn0039043	FBgn0034215						FBgn0262614
FBgn0034535	FBgn0052205	FBgn0039052	FBgn0034223						FBgn0262647
FBgn0034540	FBgn0052218	FBgn0039054	FBgn0034224						FBgn0262656
FBgn0034564	FBgn0052241	FBgn0039055	FBgn0034232						FBgn0262679
FBgn0034570	FBgn0052250	FBgn0039064	FBgn0034245						FBgn0262733
FBgn0034576	FBgn0052251	FBgn0039069	FBgn0034247						FBgn0262736
FBgn0034578	FBgn0052264	FBgn0039073	FBgn0034249						FBgn0262738
FBgn0034579	FBgn0052266	FBgn0039075	FBgn0034259						FBgn0262810
FBgn0034590	FBgn0052296	FBgn0039081	FBgn0034262						FBgn0262867
FBgn0034598	FBgn0052302	FBgn0039085	FBgn0034267						FBgn0262869
FBgn0034599	FBgn0052311	FBgn0039098	FBgn0034269						FBgn0262887
FBgn0034606	FBgn0052350	FBgn0039107	FBgn0034271						FBgn0263006
FBgn0034638	FBgn0052364	FBgn0039111	FBgn0034288						FBgn0263037
FBgn0034641	FBgn0052365	FBgn0039114	FBgn0034289						FBgn0263081
FBgn0034644	FBgn0052373	FBgn0039116	FBgn0034290						FBgn0263143
FBgn0034645	FBgn0052405	FBgn0039128	FBgn0034292						FBgn0263216
FBgn0034646	FBgn0052412	FBgn0039131	FBgn0034296						FBgn0263220
FBgn0034650	FBgn0052423	FBgn0039151	FBgn0034300						FBgn0263257
FBgn0034654	FBgn0052436	FBgn0039157	FBgn0034301						FBgn0263353
FBgn0034657	FBgn0052479	FBgn0039161	FBgn0034312						FBgn0263354
FBgn0034662	FBgn0052499	FBgn0039167	FBgn0034317						FBgn0263380
FBgn0034691	FBgn0052512	FBgn0039186	FBgn0034335						FBgn0263390
FBgn0034694	FBgn0052564	FBgn0039195	FBgn0034351						FBgn0263397
FBgn0034704	FBgn0052603	FBgn0039198	FBgn0034354						FBgn0263510
FBgn0034705	FBgn0052626	FBgn0039202	FBgn0034356						FBgn0263598
FBgn0034708	FBgn0052633	FBgn0039203	FBgn0034361						FBgn0263605
FBgn0034709	FBgn0052649	FBgn0039207	FBgn0034362						FBgn0263705
FBgn0034716	FBgn0052669	FBgn0039209	FBgn0034365						FBgn0263776
FBgn0034718	FBgn0052687	FBgn0039217	FBgn0034366						FBgn0263831
FBgn0034722	FBgn0052694	FBgn0039224	FBgn0034387						FBgn0263855
FBgn0034723	FBgn0052702	FBgn0039227	FBgn0034391						FBgn0263979
FBgn0034727	FBgn0052719	FBgn0039232	FBgn0034394						FBgn0263980
FBgn0034734	FBgn0052732	FBgn0039239	FBgn0034399						FBgn0264001
FBgn0034742	FBgn0052767	FBgn0039250	FBgn0034403						FBgn0264075
FBgn0034743	FBgn0052816	FBgn0039251	FBgn0034405						FBgn0264086
FBgn0034744	FBgn0052843	FBgn0039252	FBgn0034406						FBgn0264269
FBgn0034753	FBgn0053056	FBgn0039264	FBgn0034408						FBgn0264272
FBgn0034786	FBgn0053080	FBgn0039274	FBgn0034422						FBgn0264291
FBgn0034791	FBgn0053127	FBgn0039297	FBgn0034427						FBgn0264308
FBgn0034793	FBgn0053128	FBgn0039300	FBgn0034429						FBgn0264384
FBgn0034795	FBgn0053156	FBgn0039304	FBgn0034437						FBgn0264386
FBgn0034797	FBgn0053180	FBgn0039311	FBgn0034439						FBgn0264488
FBgn0034800	FBgn0053181	FBgn0039325	FBgn0034441						FBgn0264503
FBgn0034803	FBgn0053182	FBgn0039326	FBgn0034451						FBgn0264562
[truncated: 2,166 more rows]
