# Supplementary material for: Upstream open reading frames buffer translational variability during Drosophila evolution and development
Source: eLife. 2025 Jun 6;14:RP104074. doi: 10.7554/eLife.104074 (PMC12143884; doi:10.7554/eLife.104074)
Supplement: Figure 7—source data 1. [file elife-104074-fig7-data1.xlsx]

## Sheet: Fig7A
Lines	Replicates	pupa_count
uKO1/uKO1	1	19
uKO1/uKO1	2	18
uKO1/uKO1	3	14
uKO1/uKO1	4	13
uKO1/uKO1	5	13
uKO1/uKO1	6	19
uKO1/uKO1	7	14
uKO1/uKO1	8	13
uKO1/uKO1	9	17
uKO1/uKO1	10	13
uKO1/uKO1	11	16
uKO1/uKO1	12	14
uKO1/uKO1	13	16
uKO1/uKO1	14	15
uKO1/uKO1	15	14
uKO1/uKO1	16	15
uKO1/uKO1	17	11
uKO1/uKO1	18	13
uKO1/uKO1	19	20
uKO1/uKO1	20	16
uKO2/uKO2	1	14
uKO2/uKO2	2	16
uKO2/uKO2	3	18
uKO2/uKO2	4	11
uKO2/uKO2	5	14
uKO2/uKO2	6	17
uKO2/uKO2	7	17
uKO2/uKO2	8	12
uKO2/uKO2	9	12
uKO2/uKO2	10	18
uKO2/uKO2	11	17
uKO2/uKO2	12	18
uKO2/uKO2	13	15
uKO2/uKO2	14	16
uKO2/uKO2	15	19
uKO2/uKO2	16	13
uKO2/uKO2	17	13
uKO2/uKO2	18	18
uKO2/uKO2	19	22
uKO2/uKO2	20	18
WT	1	22
WT	2	22
WT	3	18
WT	4	20
WT	5	23
WT	6	20
WT	7	25
WT	8	19
WT	9	21
WT	10	24
WT	11	19
WT	12	21
WT	13	24
WT	14	25
WT	15	22
WT	16	17
WT	17	16
WT	18	20
WT	19	23
WT	20	19

## Sheet: Fig7B
Lines_cross	Replicates	Offspring_num
uKO1_self	1	16
uKO1_self	2	13
uKO1_self	3	52
uKO1_self	4	25
uKO1_self	5	59
uKO1_self	6	32
uKO1_self	7	42
uKO1_self	8	32
uKO1_self	9	68
uKO1_self	10	54
uKO1_self	11	12
uKO1_self	12	60
uKO1_self	13	33
uKO1_self	14	50
uKO1_self	15	61
uKO1_self	16	43
uKO1_self	17	27
uKO1_self	18	42
uKO1_female	1	88
uKO1_female	2	71
uKO1_female	3	51
uKO1_female	4	46
uKO1_female	5	39
uKO1_female	6	62
uKO1_female	7	66
uKO1_female	8	50
uKO1_female	9	62
uKO1_female	10	47
uKO1_female	11	59
uKO1_female	12	60
uKO1_female	13	53
uKO1_female	14	33
uKO1_female	15	63
uKO1_female	16	68
uKO1_female	17	40
uKO1_female	18	54
uKO1_female	19	11
uKO1_male	1	146
uKO1_male	2	47
uKO1_male	3	38
uKO1_male	4	100
uKO1_male	5	102
uKO1_male	6	84
uKO1_male	7	132
uKO1_male	8	0
uKO1_male	9	109
uKO1_male	10	47
uKO1_male	11	58
uKO1_male	12	80
uKO1_male	13	83
uKO1_male	14	95
uKO1_male	15	57
uKO1_male	16	66
uKO1_male	17	99
WT_self	1	0
WT_self	2	109
WT_self	3	99
WT_self	4	82
WT_self	5	87
WT_self	6	82
WT_self	7	0
WT_self	8	125
WT_self	9	48
WT_self	10	72
WT_self	11	69
WT_self	12	92
WT_self	13	101
WT_self	14	75
WT_self	15	97
WT_self	16	94
WT_self	17	82
WT_self	18	103
WT_self	19	79
uKO2_self	1	60
uKO2_self	2	5
uKO2_self	3	24
uKO2_self	4	62
uKO2_self	5	34
uKO2_self	6	30
uKO2_self	7	59
uKO2_self	8	24
uKO2_self	9	22
uKO2_self	10	51
uKO2_self	11	30
uKO2_self	12	44
uKO2_self	13	54
uKO2_self	14	53
uKO2_self	15	60
uKO2_self	16	14
uKO2_self	17	53
uKO2_self	18	43
uKO2_self	1	52
uKO2_female	2	48
uKO2_female	3	9
uKO2_female	4	67
uKO2_female	5	96
uKO2_female	6	59
uKO2_female	7	0
uKO2_female	8	52
uKO2_female	9	37
uKO2_female	10	48
uKO2_female	11	45
uKO2_female	12	41
uKO2_female	13	65
uKO2_female	14	81
uKO2_female	15	73
uKO2_female	16	50
uKO2_female	17	43
uKO2_female	18	39
uKO2_female	19	50
uKO2_female	20	62
uKO2_male	1	92
uKO2_male	2	56
uKO2_male	3	0
uKO2_male	4	147
uKO2_male	5	133
uKO2_male	6	150
uKO2_male	7	114
uKO2_male	8	88
uKO2_male	9	83
uKO2_male	10	101
uKO2_male	11	103
uKO2_male	12	75
uKO2_male	13	65
uKO2_male	14	0
uKO2_male	15	81
uKO2_male	16	43
uKO2_male	17	64
uKO2_male	18	103
uKO2_male	19	91

## Sheet: Fig7C
Lines_cross	Replicates	Offspring_num
uKO1_self	1	7
uKO1_self	2	11
uKO1_self	3	18
uKO1_self	4	14
uKO1_self	5	2
uKO1_self	6	9
uKO1_self	7	14
uKO1_self	8	9
uKO1_self	9	5
uKO1_self	10	10
uKO1_self	11	13
uKO1_self	12	3
uKO1_self	13	8
uKO1_self	14	12
uKO1_self	15	12
uKO1_female	1	6
uKO1_female	2	9
uKO1_female	3	11
uKO1_female	4	7
uKO1_female	5	21
uKO1_female	6	9
uKO1_female	7	13
uKO1_female	8	11
uKO1_female	9	7
uKO1_female	10	14
uKO1_female	11	4
uKO1_female	12	12
uKO1_female	13	12
uKO1_female	14	9
uKO1_male	1	1
uKO1_male	2	53
uKO1_male	3	34
uKO1_male	4	2
uKO1_male	5	9
uKO1_male	6	62
uKO1_male	7	11
uKO1_male	8	64
uKO1_male	9	10
uKO1_male	10	44
uKO1_male	11	11
uKO1_male	12	68
uKO1_male	13	47
uKO1_male	14	12
uKO1_male	15	8
uKO1_male	16	72
uKO1_male	17	82
uKO1_male	18	18
uKO2_self	1	2
uKO2_self	2	2
uKO2_self	3	23
uKO2_self	4	43
uKO2_self	5	2
uKO2_self	6	6
uKO2_self	7	11
uKO2_self	8	10
uKO2_self	9	4
uKO2_self	10	3
uKO2_self	11	8
uKO2_self	12	0
uKO2_self	13	1
uKO2_self	14	10
uKO2_self	15	6
uKO2_self	16	9
uKO2_self	17	13
uKO2_self	18	6
uKO2_self	19	3
uKO2_self	20	7
uKO2_female	1	14
uKO2_female	2	7
uKO2_female	3	9
uKO2_female	4	21
uKO2_female	5	6
uKO2_female	6	18
uKO2_female	7	11
uKO2_female	8	22
uKO2_female	9	3
uKO2_female	10	19
uKO2_female	11	7
uKO2_female	12	1
uKO2_female	13	13
uKO2_female	14	2
uKO2_female	15	20
uKO2_female	16	10
uKO2_female	17	13
uKO2_female	18	31
uKO2_female	19	5
uKO2_female	20	38
uKO2_male	1	26
uKO2_male	2	61
uKO2_male	3	107
uKO2_male	4	107
uKO2_male	5	92
uKO2_male	6	55
uKO2_male	7	108
uKO2_male	8	74
uKO2_male	9	8
uKO2_male	10	72
uKO2_male	11	73
uKO2_male	12	104
uKO2_male	13	36
uKO2_male	14	18
uKO2_male	15	74
uKO2_male	16	88
uKO2_male	17	29
uKO2_male	18	41
uKO1_male_uKO2_female	1	2
uKO1_male_uKO2_female	2	5
uKO1_male_uKO2_female	3	11
uKO1_male_uKO2_female	4	7
uKO1_male_uKO2_female	5	15
uKO1_male_uKO2_female	6	3
uKO1_male_uKO2_female	7	7
uKO1_male_uKO2_female	8	8
uKO1_male_uKO2_female	9	6
uKO1_male_uKO2_female	10	1
uKO1_male_uKO2_female	11	2
uKO1_male_uKO2_female	12	4
uKO1_male_uKO2_female	13	1
uKO1_male_uKO2_female	14	9
uKO1_male_uKO2_female	15	13
uKO1_male_uKO2_female	16	18
uKO1_male_uKO2_female	17	2
uKO1_female_uKO2_male	1	8
uKO1_female_uKO2_male	2	19
uKO1_female_uKO2_male	3	3
uKO1_female_uKO2_male	4	7
uKO1_female_uKO2_male	5	15
uKO1_female_uKO2_male	6	23
uKO1_female_uKO2_male	7	6
uKO1_female_uKO2_male	8	0
uKO1_female_uKO2_male	9	13
uKO1_female_uKO2_male	10	16
uKO1_female_uKO2_male	11	0
uKO1_female_uKO2_male	12	2
uKO1_female_uKO2_male	13	11
uKO1_female_uKO2_male	14	17
uKO1_female_uKO2_male	15	1
uKO1_female_uKO2_male	16	0
WT_self	1	100
WT_self	2	64
WT_self	3	26
WT_self	4	120
WT_self	5	53
WT_self	6	42
WT_self	7	71
WT_self	8	104
WT_self	9	107
WT_self	10	18
WT_self	11	67
WT_self	12	97
WT_self	13	28
WT_self	14	42
WT_self	15	6
WT_self	16	84
WT_self	17	42
WT_self	18	94
WT_self	19	3

## Sheet: Fig7D
Death number			Starvation time
Lines	Sex	Replicates	0h	6h	18h	24h	30h	42h	48h	54h	66h	72h	78h	90h	100h
uKO1/uKO1	male	1	0	0	0	1	1	2	4	8	9	9	9	10	10
uKO1/uKO1	male	2	0	0	0	0	0	1	4	7	9	10	10	10	10
uKO1/uKO1	male	3	0	0	0	0	0	4	8	9	9	9	10	10	10
uKO1/uKO1	male	4	0	0	0	0	0	2	6	9	9	9	9	10	10
uKO1/uKO1	male	5	0	0	0	0	0	2	8	9	10	10	10	10	10
uKO1/uKO1	male	6	0	0	0	0	1	3	6	8	9	9	9	10	10
uKO1/uKO1	male	7	0	0	0	1	1	3	4	9	9	9	9	10	10
uKO1/uKO1	male	8	0	0	0	0	0	8	8	9	9	10	10	10	10
uKO1/uKO1	male	9	0	0	0	0	1	3	5	7	8	9	10	10	10
uKO1/uKO1	male	10	0	0	0	0	0	2	7	9	9	10	10	10	10
uKO1/uKO1	female	1	0	0	0	0	0	0	0	1	5	8	10	10	10
uKO1/uKO1	female	2	0	0	0	0	0	0	1	5	7	7	7	10	10
uKO1/uKO1	female	3	0	0	0	0	0	0	0	0	3	8	9	9	10
uKO1/uKO1	female	4	0	0	0	0	1	1	2	2	8	8	10	10	10
uKO1/uKO1	female	5	0	0	0	0	0	0	1	3	5	7	8	9	10
uKO1/uKO1	female	6	0	0	0	0	0	0	0	1	4	6	9	10	10
uKO1/uKO1	female	7	0	0	0	0	1	1	1	1	3	4	7	9	10
uKO1/uKO1	female	8	0	0	0	0	0	0	2	4	7	8	10	10	10
uKO1/uKO1	female	9	0	0	0	0	0	0	1	3	7	8	10	10	10
uKO1/uKO1	female	10	0	0	0	0	1	1	1	2	6	9	10	10	10
uKO2/uKO2	male	1	0	0	0	0	1	5	9	10	10	10	10	10	10
uKO2/uKO2	male	2	0	0	0	0	0	7	8	10	10	10	10	10	10
uKO2/uKO2	male	3	0	0	0	0	0	4	8	10	10	10	10	10	10
uKO2/uKO2	male	4	0	0	0	0	0	4	9	10	10	10	10	10	10
uKO2/uKO2	male	5	0	0	0	0	0	4	8	9	10	10	10	10	10
uKO2/uKO2	male	6	0	0	0	1	5	9	10	10	10	10	10	10	10
uKO2/uKO2	male	7	0	0	0	0	2	7	9	10	10	10	10	10	10
uKO2/uKO2	male	8	0	0	0	0	4	8	10	10	10	10	10	10	10
uKO2/uKO2	male	9	0	0	0	1	3	5	6	10	10	10	10	10	10
uKO2/uKO2	male	10	0	0	0	0	0	8	10	10	10	10	10	10	10
uKO2/uKO2	female	1	0	0	0	0	0	0	0	3	7	10	10	10	10
uKO2/uKO2	female	2	0	0	0	0	0	0	1	6	9	10	10	10	10
uKO2/uKO2	female	3	0	0	0	0	0	2	4	5	10	10	10	10	10
uKO2/uKO2	female	4	0	0	0	0	0	0	1	2	8	10	10	10	10
uKO2/uKO2	female	5	0	0	0	0	0	1	2	6	9	9	10	10	10
uKO2/uKO2	female	6	0	0	0	0	0	0	3	4	8	8	10	10	10
uKO2/uKO2	female	7	0	0	0	0	0	2	3	6	9	10	10	10	10
uKO2/uKO2	female	8	0	0	0	0	0	0	0	4	8	8	9	9	10
uKO2/uKO2	female	9	0	0	0	0	0	1	3	8	10	10	10	10	10
uKO2/uKO2	female	10	0	0	0	0	1	3	7	8	9	9	9	9	10
WT	male	1	0	0	0	0	0	2	3	7	10	10	10	10	10
WT	male	2	0	0	0	0	0	1	4	8	10	10	10	10	10
WT	male	3	0	0	0	0	0	2	4	8	9	10	10	10	10
WT	male	4	0	0	0	0	0	0	1	4	9	10	10	10	10
WT	male	5	0	0	0	0	0	3	4	7	10	10	10	10	10
WT	male	6	0	0	0	1	1	3	5	7	10	10	10	10	10
WT	male	7	0	0	0	1	1	1	4	9	10	10	10	10	10
WT	male	8	0	0	0	1	1	1	4	7	9	10	10	10	10
WT	male	9	0	0	0	0	0	2	7	8	9	10	10	10	10
WT	male	10	0	0	0	1	1	2	6	7	10	10	10	10	10
WT	female	1	0	0	0	0	0	0	1	1	1	2	7	7	10
WT	female	2	0	0	0	0	0	0	0	0	3	6	7	8	10
WT	female	3	0	0	0	0	0	0	1	1	2	5	5	8	9
WT	female	4	0	0	0	0	0	0	0	1	3	5	6	8	10
WT	female	5	0	0	0	0	0	0	0	0	1	4	5	9	10
WT	female	6	0	0	0	0	0	1	1	1	2	2	3	8	9
WT	female	7	0	0	0	0	0	0	0	1	2	2	5	9	9
WT	female	8	0	0	0	0	0	0	0	1	3	5	7	9	10
WT	female	9	0	0	0	0	0	0	0	0	0	0	3	8	9
WT	female	10	0	0	0	0	0	0	1	1	1	1	2	8	9
