# Supplementary material for: Upstream open reading frames buffer translational variability during Drosophila evolution and development
Source: eLife. 2025 Jun 6;14:RP104074. doi: 10.7554/eLife.104074 (PMC12143884; doi:10.7554/eLife.104074)
Supplement: Figure 8—figure supplement 2—source data 1. [file elife-104074-fig8-figsupp2-data1.xlsx]

## Sheet: figS30
Tissue	Species	log2uORF_TE	log2CDS_TE
brain	human	-0.296548	0.452376
brain	human	2.3682	0.452376
brain	human	0.052748	0.549125
brain	human	1.76668	0.675358
brain	human	1.11496	0.675358
brain	human	0.137877	0.675358
brain	human	3.5622	0.675358
brain	human	-2.69441	0.675358
brain	human	1.08875	0.675358
brain	human	0.753155	0.675358
brain	human	3.02341	-0.382236
brain	human	-1.90071	0.696293
brain	human	0.579047	0.696293
brain	human	0.831865	0.427137
brain	human	2.832	1.49754
brain	human	-1.08931	-0.771729
brain	human	-0.00155934	0.613262
brain	human	-0.743694	0.613262
brain	human	-4.81803	-0.806753
brain	human	-0.548136	-0.806753
brain	human	-2.6172	-0.315167
brain	human	3.11415	1.07791
brain	human	0.519887	-2.55019
brain	human	-0.315845	-2.55019
brain	human	3.25757	-2.55019
brain	human	-0.114055	0
brain	human	-1.0038	0
brain	human	-2.38704	0
brain	human	-3.78493	0
brain	human	-2.31129	0
brain	human	-0.730042	0
brain	human	1.07246	0
brain	human	1.15962	0
brain	human	-0.83583	0
brain	human	1.26215	0
brain	human	1.00876	0.269593
brain	human	-0.537376	-0.207416
brain	human	0.894019	0.543409
brain	human	-1.48159	0.543409
brain	human	-0.82386	0.543409
brain	human	3.33206	0.543409
brain	human	1.18148	0.543409
brain	human	0.159165	0.543409
brain	human	0.410382	1.42589
brain	human	-0.467938	-0.530549
brain	human	-0.689697	-0.342524
brain	human	-0.854195	-0.342524
brain	human	-0.392969	-0.342524
brain	human	0.047545	-0.342524
brain	human	0.759566	-0.342524
brain	human	-1.25297	-0.342524
brain	human	0.7582	-0.342524
brain	human	0.744984	0.273977
brain	human	1.79284	0.273977
brain	human	-1.58554	1.18171
brain	human	1.04842	1.18171
brain	human	-0.186939	1.18171
brain	human	0.124983	-0.316074
brain	human	1.00902	-0.316074
brain	human	0.452247	-0.316074
brain	human	-1.4582	0.573301
brain	human	-2.52995	0.573301
brain	human	-2.29857	0.573301
brain	human	-1.21898	0.000750824
brain	human	4.10845	1.03975
brain	human	0.455937	-0.0726185
brain	human	0.575599	1.29292
brain	human	1.97885	0.535801
brain	human	2.21107	0.535801
brain	human	-0.586618	-2.37988
brain	human	-2.14392	-2.37988
brain	human	-4.4909	-0.248109
brain	human	2.93992	-0.248109
brain	human	-0.739845	-1.75132
brain	human	-2.15519	-1.75132
brain	human	-1.34547	-1.75132
brain	human	-1.82657	-1.75132
brain	human	-0.558619	-1.75132
brain	human	-1.23067	-1.75132
brain	human	-0.866107	1.29569
brain	human	3.08271	1.29569
brain	human	-3.13181	1.29569
brain	human	2.55092	1.29569
brain	human	-0.11531	1.26987
brain	human	0.175751	1.26987
brain	human	-1.45157	1.26987
brain	human	-1.53194	1.26987
brain	human	-1.53078	1.26987
brain	human	1.25826	1.26987
brain	human	-0.531232	1.08258
brain	human	-0.531912	1.08258
brain	human	4.8211	0.190022
brain	human	-1.7118	-0.861459
brain	human	0.321821	1.58019
brain	human	0.305256	-0.0662513
brain	human	1.6616	-1.57831
brain	human	1.15082	-1.57831
brain	human	1.79719	-1.17626
brain	human	-2.75006	0.660743
brain	human	0.15574	1.11495
brain	human	-1.88117	1.11495
brain	human	-2.03653	1.11495
brain	human	-1.64675	1.11495
brain	human	-1.83681	-0.764182
brain	human	-1.42696	-0.764182
brain	human	-1.84351	-0.764182
brain	human	-1.1473	-0.764182
brain	human	-1.26451	-0.764182
brain	human	-2.056	-0.764182
brain	human	-3.90093	-0.764182
brain	human	1.48489	0.927489
brain	human	1.85143	0.927489
brain	human	0.208086	-0.457733
brain	human	-1.0297	-0.457733
brain	human	0.165923	0.268116
brain	human	3.53846	1.04524
brain	human	0.00241966	1.04524
brain	human	1.69299	1.04524
brain	human	2.03189	1.04524
brain	human	1.33558	1.04524
brain	human	3.75353	3.714
brain	human	-1.89439	0.150153
brain	human	2.19036	1.77177
brain	human	-0.470712	-1.59485
brain	human	1.83175	-1.59485
brain	human	1.4812	-1.59485
brain	human	2.2236	-1.59485
brain	human	2.91215	-1.59485
brain	human	1.61651	-1.59485
brain	human	-3.06286	0.18199
brain	human	0.125311	-0.984899
brain	human	2.504	-0.984899
brain	human	1.78094	1.68615
brain	human	3.11743	1.68615
brain	human	2.02002	1.68615
brain	human	1.83685	1.68615
brain	human	2.1585	1.68615
brain	human	-0.180828	0.904317
brain	human	2.54354	0.904317
brain	human	3.00478	-0.5255
brain	human	2.03794	-0.5255
brain	human	-1.26083	-0.460033
brain	human	1.71372	-0.460033
brain	human	1.60124	-0.460033
brain	human	1.12627	-0.460033
brain	human	-2.54003	-0.460033
brain	human	-1.48522	-0.433038
brain	human	-1.73222	-0.433038
brain	human	-4.09355	-0.433038
brain	human	-1.12145	-0.433038
brain	human	-0.385088	-0.433038
brain	human	0.453502	-0.616951
brain	human	0.0965745	-0.616951
brain	human	0.223131	0.338765
brain	human	-0.737703	0.429605
brain	human	-2.36452	0.705796
brain	human	2.39795	0.289225
brain	human	0.735712	0.289225
brain	human	1.93046	0.289225
brain	human	-0.0487575	0.289225
brain	human	3.10539	0.289225
brain	human	3.11017	0.289225
brain	human	-0.505416	0.289225
brain	human	-1.09163	0.123174
brain	human	-1.3701	-1.57557
brain	human	-2.71883	-1.57557
brain	human	1.52173	-1.57557
brain	human	0.521291	-1.57557
brain	human	0.928288	-1.57557
brain	human	1.36242	-1.57557
brain	human	1.68122	-1.57557
brain	human	-1.00112	-1.57557
brain	human	-1.46182	-1.57557
brain	human	0.836615	-1.57557
brain	human	0.122682	-1.57557
brain	human	-0.708371	-0.65648
brain	human	0.632714	-0.65648
brain	human	0.260499	1.95158
brain	human	1.27239	0.477731
brain	human	-5.43068	0.477731
brain	human	2.07151	0.315172
brain	human	0.412575	-0.547278
brain	human	0.656738	0.323264
brain	human	1.58448	0.323264
brain	human	-0.740669	0.3415
brain	human	1.71152	0.534765
brain	human	1.83686	1.51994
brain	human	1.45922	0.977735
brain	human	-0.0606055	0.0509949
brain	human	3.31069	0.0369139
brain	human	3.30908	0.0369139
brain	human	3.56159	0.0369139
brain	human	0.0320883	1.78858
brain	human	-1.32092	0.325419
brain	human	1.1782	0.140384
brain	human	8.65179	0.140384
brain	human	1.4105	-0.890519
brain	human	1.89161	-0.890519
brain	human	2.47798	-0.890519
brain	human	-0.76766	-0.890519
brain	human	-0.842237	-0.890519
brain	human	-1.00815	-0.890519
brain	human	-1.61986	-0.890519
brain	human	-0.105048	-0.890519
brain	human	-1.13102	-0.890519
brain	human	-0.493912	-0.890519
brain	human	4.01045	0.465891
brain	human	3.98408	0.465891
brain	human	0.718525	0.465891
brain	human	1.61123	0.465891
brain	human	1.16977	0.465891
brain	human	2.37066	0.465891
brain	human	1.57861	0.465891
brain	human	-1.09724	-1.20607
brain	human	-1.96411	-1.20607
brain	human	0.145242	-0.383046
brain	human	-0.137113	-0.383046
brain	human	-0.123615	-0.383046
brain	human	-2.14001	0.0743326
brain	human	-0.338537	-0.787021
brain	human	-2.37507	1.46405
brain	human	0.924954	-2.50374
brain	human	-0.815114	-1.02652
brain	human	-5.03924	-1.02652
brain	human	-3.01851	-1.02652
brain	human	2.85648	1.66038
brain	human	2.027	1.66038
brain	human	2.3098	0.270285
brain	human	2.45187	0.270285
brain	human	-0.221778	0.270285
brain	human	0.138082	-1.23214
brain	human	2.43505	-1.23214
brain	human	-0.430502	-1.23214
brain	human	0.0977947	-1.23214
brain	human	0.715612	-1.23214
brain	human	0.305596	-1.23214
brain	human	-1.55134	-1.23214
brain	human	0.109408	-1.23214
brain	human	1.73543	-1.23214
brain	human	-1.98724	-1.23214
brain	human	1.21774	-1.23214
brain	human	0.937336	0.68912
brain	human	2.22591	0.68912
brain	human	2.08747	0.457305
brain	human	0.620773	1.60169
brain	human	0.514012	-1.10218
brain	human	-0.112066	-1.10218
brain	human	0.107748	-0.583272
brain	human	0.342777	0.83184
brain	human	0.0219726	0.83184
brain	human	-3.95913	-0.634639
brain	human	-0.916451	-0.634639
brain	human	-1.75435	1.04537
brain	human	1.98809	-1.58005
brain	human	4.65038	0.759978
brain	human	4.79951	0.759978
brain	human	-0.0571663	-0.110494
brain	human	2.44739	-0.110494
brain	human	0.608536	4.36902
brain	human	-0.080548	-0.501031
brain	human	-3.68187	-0.501031
brain	human	1.0982	-0.501031
brain	human	-0.0442235	-0.501031
brain	human	3.65312	0.593801
brain	human	0.398228	0.593801
brain	human	2.30007	0.593801
brain	human	-3.88825	0.388335
brain	human	-1.60624	0.388335
brain	human	-0.391777	0.388335
brain	human	0.391819	0.388335
brain	human	-0.209157	0.388335
brain	human	-0.120783	0.388335
brain	human	0.96806	-0.46682
brain	human	0.00543406	-0.46682
brain	human	-1.98973	1.23807
brain	human	-1.78007	1.23807
brain	human	1.21964	-1.50554
brain	human	0.997365	-1.50554
brain	human	1.98763	-1.50554
brain	human	1.00359	-1.50554
brain	human	0.666251	1.41474
brain	human	2.04505	1.54723
brain	human	-0.396168	1.69155
brain	human	-0.0576507	1.69155
brain	human	-0.780185	1.69155
brain	human	7.09198	1.69155
brain	human	3.47592	-0.947978
brain	human	0.258217	-2.99126
brain	human	-0.307296	-2.99126
brain	human	0.528548	-2.99126
brain	human	0.627687	-2.99126
brain	human	-0.918411	-0.0626874
brain	human	0.860233	-0.0626874
brain	human	3.56047	-0.640943
brain	human	0.809578	-0.640943
brain	human	6.95822	-0.640943
brain	human	4.34963	-0.640943
brain	human	7.8139	-0.640943
brain	human	0.0827871	-0.640943
brain	human	-0.241119	-0.164491
brain	human	-0.695493	-0.164491
brain	human	0.0547675	-0.164491
brain	human	-1.32159	-0.164491
brain	human	0.582085	1.83392
brain	human	2.77267	-0.382455
brain	human	-1.39884	-0.382455
brain	human	-0.283822	0.187568
brain	human	-0.523099	-0.13079
brain	human	-0.240153	-0.13079
brain	human	-1.57181	-0.13079
brain	human	2.35314	-0.13079
brain	human	0.423569	-0.13079
brain	human	-0.11036	-0.13079
brain	human	1.92984	-0.14844
brain	human	1.79646	-0.14844
brain	human	-4.14947	-0.481196
brain	human	-0.960355	-0.309467
brain	human	-1.97189	-0.309467
brain	human	-0.962657	-0.309467
brain	human	2.30788	3.169
brain	human	-0.706711	-1.28026
brain	human	1.77093	-1.28026
brain	human	-4.25782	-1.28026
brain	human	-2.5468	-1.28026
brain	human	2.57995	0.125895
brain	human	2.68126	0.125895
brain	human	-3.36289	0.125895
brain	human	-1.94088	0.224001
brain	human	-2.17688	1.26495
brain	human	2.71986	1.26495
brain	human	2.85916	1.26495
brain	human	-1.36007	0.900119
brain	human	-1.75091	1.28377
brain	human	-1.73557	1.28377
brain	human	2.64402	-0.0820274
brain	human	3.13345	-0.0820274
brain	human	2.15144	-0.0820274
brain	human	-0.900083	-0.287754
brain	human	-0.376134	-0.287754
brain	human	-1.11813	1.9173
brain	human	-2.67549	0.543485
brain	human	-0.460016	0.543485
brain	human	-2.00031	0.344393
brain	human	0.607071	0.344393
brain	human	-0.862917	0.510025
brain	human	-0.975605	0.510025
brain	human	-2.12942	0.923183
brain	human	-0.999482	-2.30478
brain	human	-2.32856	-2.30478
brain	human	0.0730669	-2.30478
brain	human	1.65729	1.10161
brain	human	1.62945	1.10161
brain	human	0.620977	1.10161
brain	human	1.62954	1.10161
brain	human	-2.56102	1.74963
brain	human	1.68101	0.957357
brain	human	-1.1795	0.957357
brain	human	-1.01545	0.726645
brain	human	1.27517	0.234648
brain	human	1.74427	0.450658
brain	human	7.09198	0.450658
brain	human	-1.11647	0.450658
brain	human	-1.23326	0.307926
brain	human	2.20939	-0.355571
brain	human	0.600089	-1.54846
brain	human	1.96033	-1.54846
brain	human	-0.938284	-1.54846
brain	human	2.56924	-1.54846
brain	human	0.402284	-1.34963
brain	human	0.634489	0.401022
brain	human	2.14917	0.401022
brain	human	5.8804	0.401022
brain	human	2.8216	-0.341246
brain	human	1.52	0.714248
brain	human	0.298454	1.5231
brain	human	1.87976	1.48907
brain	human	-1.0208	0.384096
brain	human	1.93608	-1.00705
brain	human	1.41083	-1.00705
brain	human	2.32361	-1.00705
brain	human	1.88412	-1.00705
brain	human	1.82773	-1.00705
brain	human	0.108709	-1.00705
brain	human	-1.82996	-1.00705
brain	human	3.79531	0.711108
brain	human	0.841225	0.711108
brain	human	-1.52344	1.10417
brain	human	-0.51614	1.10417
brain	human	5.34062	-2.1536
brain	human	-0.559166	-0.0576967
brain	human	0.818915	0.619661
brain	human	1.27614	0.619661
brain	human	1.09592	0.732752
brain	human	-2.6521	0.984311
brain	human	1.57453	0.984311
brain	human	0.361343	0.0256236
brain	human	0.582816	0.0256236
brain	human	-1.30899	0.941105
brain	human	0.519824	1.45998
brain	human	-0.738406	0.35862
brain	human	-0.799287	0.35862
brain	human	0.0956964	0.35862
brain	human	-1.96195	0.35862
brain	human	-0.969149	0.35862
brain	human	1.57411	0.099206
brain	human	-2.59124	0.099206
brain	human	1.2525	1.21116
brain	human	0.084682	1.21116
brain	human	1.27027	-0.988293
brain	human	-2.34973	1.41745
brain	human	2.58319	1.41745
brain	human	1.66546	0.511523
brain	human	0.256716	1.00563
brain	human	-0.882852	0.456818
brain	human	-2.55869	-0.817335
brain	human	2.57007	-0.817335
brain	human	-2.04665	0.621108
brain	human	-1.51231	-0.238564
brain	human	-2.16299	2.19142
brain	human	-3.11719	1.20331
brain	human	-3.10067	1.20331
brain	human	1.5972	0.724311
brain	human	1.5805	-0.160346
brain	human	0.37126	-0.160346
brain	human	-0.456424	-0.160346
brain	human	1.19802	-0.160346
brain	human	4.01089	1.1752
brain	human	2.14996	1.1752
brain	human	3.83683	1.1752
brain	human	-4.88581	1.1752
brain	human	0.618236	1.1752
brain	human	1.01036	0.60046
brain	human	0.296103	0.583342
brain	human	-0.402062	1.89268
brain	human	-0.844672	-1.24678
brain	human	-0.633824	-1.24678
brain	human	-1.41009	-1.24678
brain	human	-0.299564	-1.51429
brain	human	0.672369	0.0277237
brain	human	3.52133	0.0277237
brain	human	0.13982	0.0277237
brain	human	0.302162	0.0277237
brain	human	-0.568231	0.0277237
brain	human	0.600539	0.0277237
brain	human	0.409565	0.0277237
brain	human	-1.41643	0.0277237
brain	human	-0.351352	0.950515
brain	human	-1.28997	0.950515
brain	human	-1.54817	0.950515
brain	human	-1.46268	0.950515
brain	human	0.511598	1.64901
brain	human	-1.69927	0.572725
brain	human	-0.049319	0.572725
brain	human	1.04843	0.258313
brain	human	0.966883	0.258313
brain	human	0.985148	0.258313
brain	human	-0.737844	0.258313
brain	human	-0.326969	0.12371
brain	human	-2.19477	-0.08258
brain	human	-2.19677	-0.08258
brain	human	0	1.59366
brain	human	-0.244384	0.556682
brain	human	-0.872754	-0.335902
brain	human	1.21764	-0.335902
brain	human	0.404993	-0.335902
brain	human	0.320026	0.623092
brain	human	-0.696395	1.15142
brain	human	0.930858	0.448453
brain	human	-0.502131	0.448453
brain	human	-2.72967	0.448453
brain	human	0.691649	0.448453
brain	human	-1.527	0.637806
brain	human	-1.83401	-3.13315
brain	human	0.183533	-3.13315
brain	human	0.185919	-3.13315
brain	human	0.303872	-3.13315
brain	human	0.365761	-3.13315
brain	human	-0.0440171	-0.145861
brain	human	-0.983657	-0.145861
brain	human	0.822379	0.792599
brain	human	-1.37305	0.795085
brain	human	-1.16894	0.795085
brain	human	1.1716	0.80139
brain	human	-1.01324	0.80139
brain	human	0.422388	0.80139
brain	human	-0.258055	0.0024806
brain	human	0.174555	-1.48973
brain	human	2.64955	0.663892
brain	human	1.00392	-1.80482
brain	human	0.114029	1.23106
brain	human	-0.953958	1.42629
brain	human	0.255317	-0.266799
brain	human	-0.46013	-0.266799
brain	human	0.0373818	-0.266799
brain	human	0.266186	-0.266799
brain	human	-1.88939	-0.266799
brain	human	-0.393235	2.2939
brain	human	2.01358	-0.495887
brain	human	-1.64613	0.378262
brain	human	-1.96435	0.378262
brain	human	-3.04022	0.378262
brain	human	-3.14123	0.378262
brain	human	-1.9109	0.378262
brain	human	-1.99589	0.378262
brain	human	0.931454	1.1657
brain	human	0.314928	1.1657
brain	human	1.0795	2.90683
brain	human	-1.17048	-0.341792
brain	human	1.03163	-0.341792
brain	human	0.195955	-0.341792
brain	human	0.18507	-0.341792
brain	human	0.188874	-0.341792
brain	human	0.047021	-0.341792
brain	human	-1.29478	-0.341792
brain	human	0.202906	-0.341792
brain	human	2.84265	-0.341792
brain	human	0.352682	0.886223
brain	human	0.583983	0.261219
brain	human	-0.798109	-1.50496
brain	human	-1.42475	-0.426556
brain	human	-0.153464	1.18595
brain	human	0.462409	1.18595
brain	human	3.58457	1.18595
brain	human	3.1245	1.18595
brain	human	1.26071	1.18595
brain	human	2.85603	-1.09435
brain	human	3.58086	-1.09435
brain	human	1.93426	-1.09435
brain	human	0.0712807	0.429282
brain	human	-0.70741	0.429282
brain	human	-2.32722	0.535552
brain	human	0.162397	0.0321643
brain	human	-0.0768493	0.0321643
brain	human	-1.92807	0.0321643
brain	human	-1.13357	-0.481876
brain	human	-5.03425	-0.481876
brain	human	-1.47937	1.02938
brain	human	-0.328219	-1.53728
brain	human	-0.355925	-1.53728
brain	human	0.199387	0.629931
brain	human	-1.49954	0.379654
brain	human	-1.24003	0.379654
brain	human	1.57519	1.36951
brain	human	0.272153	1.36951
brain	human	0.146155	0.891563
brain	human	0.808051	-0.504557
brain	human	-2.65558	1.05335
brain	human	-0.55322	-0.265241
brain	human	2.615	-0.140409
brain	human	2.68147	-0.140409
brain	human	0.703482	-2.3989
brain	human	1.39204	-2.3989
brain	human	1.32314	-2.3989
brain	human	0.334734	-2.3989
brain	human	1.78062	-2.3989
brain	human	1.25099	-2.3989
brain	human	0.326869	-1.33851
brain	human	-1.43072	-1.33851
brain	human	0.00885179	-1.33851
brain	human	1.16165	-1.33851
brain	human	-0.336591	-1.33851
brain	human	-0.724877	-1.33851
brain	human	0.991233	-1.33851
brain	human	-0.352751	-1.33851
brain	human	-0.723392	-1.33851
brain	human	-0.947831	-1.33851
brain	human	0.821279	-1.33851
brain	human	-1.83193	-1.33851
brain	human	-3.18522	1.16636
brain	human	2.417	-0.401278
brain	human	-1.10986	-1.25287
brain	human	2.26176	-0.200095
brain	human	1.16503	-0.200095
brain	human	1.00392	-0.200095
brain	human	0.528042	-0.0755639
brain	human	2.49032	1.1708
brain	human	1.87819	0.0381422
brain	human	1.82192	0.0381422
brain	human	1.51148	0.0381422
brain	human	0.255296	0.0381422
brain	human	1.51183	0.0381422
brain	human	2.9476	0.0854722
brain	human	0.935456	0.0854722
brain	human	1.79649	0.0854722
brain	human	2.75533	0.0854722
brain	human	0.646538	0.0854722
brain	human	-0.120783	0.75346
brain	human	-0.0973218	1.31064
brain	human	-0.285771	-1.7056
brain	human	-0.28905	-1.7056
brain	human	2.23336	1.7982
brain	human	0.0265188	1.7982
brain	human	-0.102051	0.208127
brain	human	3.75152	0.208127
brain	human	-1.34091	0.208127
brain	human	-0.389685	0.208127
brain	human	-1.27723	0.208127
brain	human	-2.79625	0.208127
brain	human	-0.371236	0.208127
brain	human	2.25197	0.208127
brain	human	-1.92623	-2.9852
brain	human	-1.70645	-2.9852
brain	human	0.578818	-2.9852
brain	human	-2.64929	-2.9852
brain	human	-1.37833	-2.9852
brain	human	-2.05035	-2.9852
brain	human	-3.42428	-2.9852
brain	human	-2.72229	-2.9852
brain	human	-2.59372	-2.9852
brain	human	-2.62171	-2.9852
brain	human	-0.970985	-2.9852
brain	human	-6.32024	-2.9852
brain	human	-2.03781	-2.9852
brain	human	0.583183	-3.98368
brain	human	2.08889	-3.98368
brain	human	2.18312	-3.98368
brain	human	0.508108	-3.98368
brain	human	2.08666	-3.98368
brain	human	0.658014	-3.98368
brain	human	2.09006	-3.98368
brain	human	1.24815	-3.98368
brain	human	2.10224	-3.98368
brain	human	2.0908	-3.98368
brain	human	-1.8871	-0.198942
brain	human	-1.76984	-0.198942
brain	human	0.579082	2.11162
brain	human	2.55111	2.11162
brain	human	0.743917	2.11162
brain	human	0.476632	1.63517
brain	human	1.97778	1.63517
brain	human	2.01796	1.63517
brain	human	-1.71569	-0.147648
brain	human	-0.381594	-1.08235
brain	human	-0.387396	-1.08235
brain	human	-0.227556	1.62485
brain	human	2.15059	0.52209
brain	human	2.64814	0.52209
brain	human	2.17156	0.52209
brain	human	-0.307449	0.202764
brain	human	0.672942	0.202764
brain	human	2.49522	-0.0566205
brain	human	-1.85855	-0.0566205
brain	human	1.0575	-0.0566205
brain	human	1.28488	-0.837703
brain	human	2.84625	0.243735
brain	human	2.61145	0.243735
brain	human	2.8888	0.255919
brain	human	-1.53458	0.255919
brain	human	-0.0773883	0.541478
brain	human	1.59716	0.541478
brain	human	0.769611	0.541478
brain	human	1.1884	0.541478
brain	human	-0.429347	0.541478
brain	human	1.02949	0.541478
brain	human	-3.03958	-1.03697
brain	human	-0.315715	-1.03697
brain	human	-1.34317	-1.03697
brain	human	-3.18625	-1.03697
brain	human	0.473491	-1.03697
brain	human	-1.33721	-1.03697
brain	human	-2.0367	0.249573
brain	human	-1.35394	0.249573
brain	human	-0.257011	0.249573
brain	human	-1.56734	0.249573
brain	human	-0.124051	1.91971
brain	human	0.0701745	1.91971
brain	human	0.747045	1.1273
brain	human	0.423684	-0.952555
brain	human	3.09945	-0.952555
brain	human	1.58368	-0.952555
brain	human	4.81491	-0.361376
brain	human	1.55315	0.201563
brain	human	1.97023	1.70536
brain	human	-0.831544	-0.897215
brain	human	1.84357	-0.470081
brain	human	-0.984763	-0.359859
brain	human	1.23631	0.0638442
brain	human	-0.154222	0.0638442
brain	human	-0.676746	0.0638442
brain	human	-0.500231	-0.416533
brain	human	-0.0183549	-0.416533
brain	human	-0.224173	-0.416533
brain	human	-1.0601	-0.416533
brain	human	-0.0492641	-0.416533
brain	human	-3.79514	-0.416533
brain	human	0.422959	-0.416533
brain	human	-2.77481	0.400485
brain	human	1.57758	-1.22712
brain	human	3.86207	-1.22712
brain	human	1.35704	-0.29786
brain	human	1.33538	-0.29786
brain	human	0.41828	1.1135
brain	human	0.0215192	0.0227508
brain	human	1.08083	0.637375
brain	human	2.84922	0.637375
brain	human	-1.85739	0.637375
brain	human	1.80846	2.24116
brain	human	2.34381	2.24116
brain	human	-0.449187	0.586565
brain	human	0.629797	1.06966
brain	human	-2.0397	0.477096
brain	human	-2.68594	0.443414
brain	human	1.45809	0.608398
brain	human	-1.11082	0.608398
brain	human	-2.80048	-3.02179
brain	human	-2.94552	-3.02179
brain	human	-3.6236	-3.02179
brain	human	-0.66839	0.318709
brain	human	1.58108	-2.48313
brain	human	-0.209768	1.42232
brain	human	1.60856	1.41427
brain	human	1.58993	1.41427
brain	human	-1.17818	0.452301
brain	human	-1.18541	-2.2274
brain	human	0.733298	-2.2274
brain	human	-1.41648	-2.2274
brain	human	-0.225626	-2.2274
brain	human	-0.638241	-2.2274
brain	human	-0.250774	-2.2274
brain	human	5.82511	-1.27683
brain	human	-0.0104075	-0.885366
brain	human	0.358926	-0.885366
brain	human	-0.303374	-0.885366
brain	human	0.970323	-0.885366
brain	human	-0.374026	-0.885366
brain	human	-2.23608	-0.885366
brain	human	-0.467118	-0.885366
brain	human	0.14891	-0.885366
brain	human	-0.862884	-0.885366
brain	human	-2.31363	-0.885366
brain	human	-0.389518	-0.885366
brain	human	-1.99053	-0.885366
brain	human	1.32537	-0.885366
brain	human	-4.05236	-0.885366
brain	human	1.72024	-0.152358
brain	human	1.74066	-0.152358
brain	human	-4.39693	1.13216
brain	human	-2.98848	1.13216
brain	human	-4.24158	1.13216
brain	human	-2.47183	1.13216
brain	human	-1.55841	1.13216
brain	human	-1.36574	1.13216
brain	human	-4.3041	1.13216
brain	human	-4.268	1.13216
brain	human	-4.44655	1.13216
brain	human	-1.88214	1.13216
brain	human	-1.78338	1.13216
brain	human	-1.54817	-0.103013
brain	human	-1.54579	-2.68397
brain	human	-1.05862	-2.68397
brain	human	-1.05945	-2.68397
brain	human	0.914603	1.55455
brain	human	1.4435	1.55455
brain	human	1.06181	1.55455
brain	human	1.55913	0.58034
brain	human	1.58124	0.58034
brain	human	-1.18559	-2.22884
brain	human	-3.23117	-2.22884
brain	human	-0.850365	0.682748
brain	human	2.63012	-0.729435
brain	human	0.509272	-0.729435
brain	human	-0.672838	-0.729435
brain	human	2.67718	-0.729435
brain	human	0.267538	0.67401
brain	human	0.740892	0.67401
brain	human	0.456552	-1.48953
brain	human	-0.843527	-1.48953
brain	human	0.29068	1.35086
brain	human	3.07857	0.878309
brain	human	-1.47045	0.499883
brain	human	3.03113	0.499883
brain	human	0.0616131	2.36374
brain	human	0.013517	-0.130555
brain	human	-3.11553	-0.130555
brain	human	2.62192	2.17506
brain	human	1.58108	4.64919
brain	human	3.73327	1.97874
brain	human	0.475695	-0.438663
brain	human	1.89797	2.15954
brain	human	-1.63308	0.612437
brain	human	0.20168	-1.23207
brain	human	0.308128	-1.23207
brain	human	-0.0957745	-1.23207
brain	human	2.72441	-1.23207
brain	human	2.68335	-1.23207
brain	human	0.0765122	-1.23207
brain	human	-2.74413	-1.09826
brain	human	-2.89462	-1.09826
brain	human	-5.74486	-1.09826
brain	human	-3.58086	-1.09826
brain	human	-2.20165	-1.09826
brain	human	-5.56987	-1.09826
brain	human	-3.59904	-1.09826
brain	human	-4.90181	-1.09826
brain	human	1.2866	-0.0159689
brain	human	1.2858	-0.0159689
brain	human	-0.184476	-0.120343
brain	human	-0.108967	-0.120343
brain	human	-1.11043	-0.120343
brain	human	-0.161919	-0.120343
brain	human	-0.431988	-0.120343
brain	human	-4.47242	-0.120343
brain	human	-1.14514	-0.120343
brain	human	-4.16862	-0.120343
brain	human	0.899538	-1.50833
brain	human	0.709804	-1.50833
brain	human	2.30037	0.836303
brain	human	2.34676	0.836303
brain	human	-2.78831	-0.984361
brain	human	-1.41049	-0.984361
brain	human	-2.9648	-0.984361
brain	human	-2.05315	-0.984361
brain	human	-0.0902379	0.0246423
brain	human	3.157	2.22347
brain	human	0.863098	2.22347
brain	human	-0.895495	2.92273
brain	human	0.693935	1.3699
brain	human	1.30129	0.313028
brain	human	-2.1344	0.313028
brain	human	1.57513	0.313028
brain	human	-1.09908	1.71447
brain	human	2.2132	1.71447
brain	human	10.701	1.71447
brain	human	0.586094	1.7204
brain	human	-0.97525	-0.0845793
brain	human	-0.792116	-0.0845793
brain	human	-3.23992	1.66617
brain	human	-1.00919	0.252994
brain	human	-0.807107	1.62633
brain	human	1.08186	0.813274
brain	human	0.922314	0.813274
brain	human	3.37074	0.333251
brain	human	-3.53003	-0.918797
brain	human	-0.0756861	-0.918797
brain	human	-0.539845	0.593537
brain	human	1.73811	0.593537
brain	human	-1.09457	-0.296853
brain	human	-1.07421	-0.339283
brain	human	0.303457	0.535181
brain	human	1.43832	0.470435
brain	human	-0.4337	0.470435
brain	human	2.19525	0.470435
brain	human	-1.00738	0.470435
brain	human	1.42401	0.470435
brain	human	1.36517	0.781844
brain	human	2.77645	0.781844
brain	human	3.24354	0.781844
brain	human	0.685985	0.781844
brain	human	-1.12923	0.386639
brain	human	-3.3899	0.888248
brain	human	1.1725	1.41705
brain	human	-0.199768	0.428766
brain	human	1.35195	0.348179
brain	human	2.04249	0.348179
brain	human	-2.32163	-1.10413
brain	human	-0.0215842	-1.10413
brain	human	0.0444127	-1.10413
brain	human	-1.17573	-1.10413
brain	human	-2.39723	-1.10413
brain	human	-0.226397	-1.10413
brain	human	-0.157947	-1.70644
brain	human	0.199033	-1.70644
brain	human	0.658659	-1.70644
brain	human	0.0179725	-1.70644
brain	human	5.8804	-1.70644
brain	human	-0.461938	-1.70644
brain	human	0.0161933	-1.70644
brain	human	-0.390311	-1.70644
brain	human	1.21192	0.199685
brain	human	-0.301563	0.199685
brain	human	2.70872	0.697147
brain	human	-1.44553	-1.90573
brain	human	0.657459	0.103506
brain	human	-1.25146	0.103506
brain	human	0.825487	-1.52372
brain	human	-0.605146	-0.087469
brain	human	0.0268099	-0.087469
brain	human	-0.322777	-0.087469
brain	human	0.519399	-0.697688
brain	human	1.17191	0.407496
brain	human	-2.12004	0.00725572
brain	human	-2.94234	0.00725572
brain	human	-2.1285	0.00725572
brain	human	-2.12426	0.00725572
brain	human	-1.68756	-0.580194
brain	human	-3.19731	-1.21172
brain	human	0.949962	0.664817
brain	human	1.07472	0.664817
brain	human	1.26389	-0.489525
brain	human	2.33018	-0.664238
brain	human	-0.129202	-0.664238
brain	human	-0.463952	-0.664238
brain	human	0.371937	0.0173835
brain	human	-0.332219	0.0173835
brain	human	0.443669	0.0173835
brain	human	0.248906	0.0173835
brain	human	-0.11796	0.0173835
brain	human	-1.75337	-0.576419
brain	human	-1.70728	-0.576419
brain	human	-1.16138	0.498651
brain	human	-2.89401	-0.929892
brain	human	-0.987662	-0.929892
brain	human	0.0408253	-0.0750281
brain	human	2.20165	0.814912
brain	human	-0.480178	-0.331149
brain	human	0.608536	1.86552
brain	human	-2.44243	1.86552
brain	human	-2.42186	1.86552
brain	human	-0.048564	1.86552
brain	human	-0.0337801	1.86552
brain	human	0.578692	0.547999
brain	human	0.576204	0.547999
brain	human	1.13708	0.547999
brain	human	1.66725	0.547999
brain	human	1.54161	0.547999
brain	human	-0.435124	-2.17649
brain	human	-0.294586	1.20722
brain	human	0.821497	1.20722
brain	human	1.33686	1.20722
brain	human	1.89578	1.20722
brain	human	0.817164	1.20722
brain	human	0.400869	0.230209
brain	human	-1.15059	0.230209
brain	human	0.261128	0.230209
brain	human	0.338706	0.181918
brain	human	0.412238	1.74017
brain	human	-2.08419	0.784714
brain	human	1.23075	0.784714
brain	human	-0.868878	0.583653
brain	human	1.16363	0.583653
brain	human	0.428639	0.74919
brain	human	2.08318	0.233295
brain	human	0.022177	0.233295
brain	human	0.830856	1.02534
brain	human	-0.76291	1.62379
brain	human	1.89579	0.0767404
brain	human	-2.09103	0.0767404
brain	human	-1.01569	1.73121
brain	human	-0.00877131	1.73121
brain	human	-0.66529	1.73121
brain	human	-0.949988	1.73121
brain	human	-1.7877	1.73121
brain	human	-1.29371	1.73121
brain	human	-1.43753	1.73121
brain	human	-1.69629	1.73121
brain	human	-2.50404	1.73121
brain	human	-0.211187	-1.07636
brain	human	-0.563259	-1.07636
brain	human	-0.937575	-0.858401
brain	human	1.44965	-0.858401
brain	human	0.443087	-0.858401
brain	human	-1.83645	-0.856989
brain	human	-3.22224	-0.849805
brain	human	0.0740414	-0.849805
brain	human	2.2159	-0.849805
brain	human	-0.062513	-0.849805
brain	human	1.67562	-0.849805
brain	human	-1.03032	1.55843
brain	human	1.23398	1.2006
brain	human	2.31017	1.2006
brain	human	1.04178	1.2006
brain	human	2.47273	1.2006
brain	human	2.24164	1.2006
brain	human	0.863098	1.2006
brain	human	2.58843	1.2006
brain	human	-0.548345	1.2006
brain	human	-3.1804	1.2006
brain	human	0.894209	0.630731
brain	human	1.98206	0.630731
brain	human	0.213679	1.0861
brain	human	0.372545	0.259628
brain	human	-1.7877	0.259628
brain	human	0.769204	0.259628
brain	human	1.74856	0.244257
brain	human	-1.92042	0.404026
brain	human	4.16851	-0.507406
brain	human	0.579299	-0.157529
brain	human	-2.32707	-1.09591
brain	human	-2.26009	-1.09591
brain	human	-1.19868	-1.09591
brain	human	1.96067	0.3136
brain	human	1.92982	0.3136
brain	human	1.35985	0.3136
brain	human	0.337646	0.50673
brain	human	-1.94952	0.50673
brain	human	0.649961	0.50673
brain	human	-1.87197	0.50673
brain	human	-1.35599	0.595776
brain	human	-2.07025	-0.966067
brain	human	-0.408738	-0.966067
brain	human	0.641471	-0.966067
brain	human	-0.983589	-0.966067
brain	human	-0.809195	-0.453567
brain	human	1.02725	-0.453567
brain	human	-0.556162	-0.453567
brain	human	-1.32611	-0.277926
brain	human	1.1349	-0.277926
brain	human	-0.153862	-0.277926
brain	human	2.46059	-0.359993
brain	human	-0.522424	-0.359993
brain	human	-0.715424	0.314951
brain	human	-1.94159	0.314951
brain	human	0.0257391	0.314951
brain	human	-4.93565	0.314951
brain	human	-3.52075	0.314951
brain	human	-1.96244	0.314951
brain	human	-2.70096	0.314951
brain	human	-1.94381	0.314951
brain	human	0.786918	0.314951
brain	human	0.504974	0.314951
brain	human	-0.699535	0.314951
brain	human	-1.21551	0.314951
brain	human	1.44861	-1.75088
brain	human	-1.32272	-1.75088
brain	human	1.31258	-1.75088
brain	human	-0.101074	-0.0293166
brain	human	0.530299	-0.0293166
brain	human	1.38893	-0.0293166
brain	human	0.101498	0.0771089
brain	human	0.356373	0.0771089
brain	human	-2.43554	0.162539
brain	human	-1.39884	0.24701
brain	human	0.864507	0.596674
brain	human	0.56207	0.596674
brain	human	0.18976	0.596674
brain	human	0.996367	0.596674
brain	human	1.43166	0.596674
brain	human	-0.438815	-0.0468433
brain	human	0.79425	-0.0468433
brain	human	-1.49933	-0.0468433
brain	human	0.0674629	-0.0468433
brain	human	0.503748	-0.31301
brain	human	-0.403746	-0.31301
brain	human	-1.57952	-0.123797
brain	human	-0.48514	0.259599
brain	human	1.77568	0.447285
brain	human	-0.389304	0.447285
brain	human	0.00108975	-0.26755
brain	human	0.599377	-1.53828
brain	human	-0.773627	-1.53828
brain	human	-2.65572	0.667515
brain	human	-3.1612	-0.906617
brain	human	-3.26593	-0.906617
brain	human	-2.86528	-0.906617
brain	human	-4.94278	-0.906617
brain	human	-5.05753	-0.906617
brain	human	-3.07205	-0.906617
brain	human	-3.46588	-0.906617
brain	human	-1.82327	-0.906617
brain	human	-4.73706	-0.906617
brain	human	-1.52897	-0.906617
brain	human	-5.15445	-0.906617
brain	human	-4.24665	-0.906617
brain	human	1.24918	-0.906617
brain	human	2.63576	0.650624
brain	human	-0.0270755	0.0154226
brain	human	0.345256	0.0154226
brain	human	-0.785194	-1.18605
brain	human	-1.5821	0.675258
brain	human	-0.411571	0.111963
brain	human	0.951217	0.507691
brain	human	9.38367	0.349361
brain	human	-2.31298	-0.0364134
brain	human	0.575692	0.0648609
brain	human	0.727416	1.32933
brain	human	0.059263	-0.328129
brain	human	1.28489	-0.328129
brain	human	-4.20311	-0.399526
brain	human	1.06614	-0.560612
brain	human	1.16844	-0.560612
brain	human	2.28007	-0.560612
brain	human	2.41067	-0.560612
brain	human	2.32279	-0.560612
brain	human	2.05871	1.2441
brain	human	3.06688	1.2441
brain	human	-2.56065	-2.00943
brain	human	-0.956828	-2.00943
brain	human	0.245116	-2.00943
brain	human	-1.30675	-2.00943
brain	human	-1.93333	-2.00943
brain	human	-1.74093	-2.00943
brain	human	0.0940666	-2.00943
brain	human	0.629123	-0.553647
brain	human	1.081	0.775364
brain	human	-1.09734	0.689228
brain	human	1.48938	0.689228
brain	human	3.1043	0.689228
brain	human	1.81215	0.242473
brain	human	-0.409482	0.242473
brain	human	1.04824	0.499685
brain	human	0.961803	0.499685
brain	human	0.265461	0.499685
brain	human	-0.725824	1.06508
brain	human	-0.697056	1.06508
brain	human	0.129897	-1.73182
brain	human	-1.24926	-1.73182
brain	human	-1.29331	0.507781
brain	human	-3.38402	-1.14435
brain	human	1.09161	-0.498844
brain	human	2.37166	-0.498844
brain	human	0.738116	-0.498844
brain	human	2.88335	-0.498844
brain	human	7.18902	-0.290158
brain	human	0.340388	-0.568649
brain	human	0.144501	-0.821272
brain	human	-1.71677	-0.821272
brain	human	-0.00684444	0.470044
brain	human	1.73645	0.470044
brain	human	-0.496685	-0.175199
brain	human	-0.46042	0.7048
brain	human	2.23073	0.7048
brain	human	2.51156	-1.59451
brain	human	-1.79651	-1.59451
brain	human	0.649005	-0.704575
brain	human	0.565156	-0.704575
brain	human	-0.100023	0.450899
brain	human	-1.02233	1.46179
brain	human	4.14352	3.99597
brain	human	5.58357	1.48394
brain	human	-3.15596	-0.614567
brain	human	0.654789	-0.614567
brain	human	0.28894	-0.614567
brain	human	1.16177	-0.614567
brain	human	0.947385	-0.614567
brain	human	2.86387	-0.614567
brain	human	2.55111	0.963556
brain	human	-0.298683	0.963556
brain	human	3.11984	0.149561
brain	human	1.20216	0.368883
brain	human	3.92667	0.368883
brain	human	2.32008	0.368883
brain	human	-0.46103	0.368883
brain	human	0.185352	0.368883
brain	human	0.513197	0.368883
brain	human	1.58559	0.368883
brain	human	-2.55648	0.368883
brain	human	1.89278	0.936634
brain	human	1.33499	-0.541877
brain	human	1.85398	-2.00905
brain	human	1.66235	-2.00905
brain	human	-0.866107	0.187077
brain	human	4.66889	-2.59118
brain	human	-1.89509	-2.59118
brain	human	-1.03931	0.696461
brain	human	1.57479	0.0961717
brain	human	2.08732	0.0961717
brain	human	0.260918	0.0961717
brain	human	0.728842	0.0961717
brain	human	1.00303	0.782416
brain	human	-1.30273	0.782416
brain	human	-4.49819	0.342103
brain	human	-1.09876	0.342103
brain	human	-1.68756	0.101224
brain	human	1.57817	-0.315491
brain	human	2.86128	0.330786
brain	human	2.41261	0.330786
brain	human	-4.0332	0.913847
brain	human	0.770601	-0.487489
brain	human	0.838705	0.187772
brain	human	1.52549	0.187772
brain	human	2.37992	0.187772
brain	human	1.55346	0.187772
brain	human	1.73476	0.187772
brain	human	-4.88151	0.187772
brain	human	-0.765667	0.187772
brain	human	-2.77481	0.187772
brain	human	0.991123	0.187772
brain	human	1.03034	0.203128
brain	human	1.18136	0.203128
brain	human	-0.23486	-0.227736
brain	human	0.0830967	1.23139
brain	human	-1.25215	1.23139
brain	human	1.17071	1.23139
brain	human	-1.45937	0.222612
brain	human	-0.213859	0.886704
brain	human	1.49641	0.886704
brain	human	0.949783	0.886704
brain	human	1.49676	0.886704
brain	human	1.415	-0.0891175
brain	human	-0.577382	-1.53261
brain	human	0.0942565	-1.53261
brain	human	-0.478516	0.473207
brain	human	-0.687644	-0.0336966
brain	human	-1.02249	-1.94466
brain	human	-4.26391	-1.94466
brain	human	0.0188607	-0.339789
brain	human	1.11206	0.139875
brain	human	0.822167	1.47931
brain	human	3.21149	1.75555
brain	human	2.99616	1.75555
brain	human	2.85338	1.75555
brain	human	3.41675	1.75555
brain	human	2.89914	1.75555
brain	human	-1.31768	-2.03172
brain	human	-1.28061	-2.03172
brain	human	0.785223	-2.03172
brain	human	-3.98502	-2.03172
brain	human	-2.29012	-2.03172
brain	human	-0.588166	-2.03172
brain	human	-2.5547	-2.03172
brain	human	-3.87669	-2.03172
brain	human	0.972782	-2.03172
brain	human	3.50525	-2.03172
brain	human	-1.56162	-2.03172
brain	human	-2.0498	-2.03172
brain	human	-2.81705	-2.03172
brain	human	-1.94829	-2.03172
brain	human	-3.42622	-2.03172
brain	human	0.0400698	-2.03172
brain	human	-2.12284	-2.03172
brain	human	0.128419	-2.03172
brain	human	-1.12312	-2.03172
brain	human	-2.17611	-2.03172
brain	human	-2.35204	-2.03172
brain	human	0.970451	-1.06897
brain	human	1.04878	-1.06897
brain	human	0.775811	0.76749
brain	human	-1.49985	-0.421278
brain	human	-1.38623	-0.421278
brain	human	2.88917	-0.775015
brain	human	-2.15342	-0.722838
brain	human	-0.422422	-0.722838
brain	human	2.48061	-0.722838
brain	human	0.311946	0.189747
brain	human	0.0973835	1.13083
brain	human	-0.0504561	1.13083
brain	human	2.66073	1.13083
brain	human	2.18556	1.32524
brain	human	-0.00727415	1.32524
brain	human	-0.304074	-2.06861
brain	human	-1.69697	0.482363
brain	human	0.182535	0.482363
brain	human	-0.103427	0.482363
brain	human	-1.40474	-1.6796
brain	human	-3.47249	-1.6796
brain	human	-4.47162	-1.6796
brain	human	-3.85729	-1.6796
brain	human	-4.91116	-1.6796
brain	human	-5.47742	-1.6796
brain	human	1.60239	0.36659
brain	human	0.108549	-1.00095
brain	human	0.259659	0.781282
brain	human	2.56236	-2.19124
brain	human	2.56364	-2.19124
brain	human	3.30076	-2.19124
brain	human	1.57817	1.82001
brain	human	0.297737	-0.652017
brain	human	-0.161707	-0.652017
brain	human	3.81588	1.02357
brain	human	-1.92143	1.02357
brain	human	3.21534	1.43339
brain	human	3.60686	1.43339
brain	human	0.990551	1.43339
brain	human	2.15841	1.43339
brain	human	-2.77622	-0.77627
brain	human	-2.90097	-0.77627
brain	human	-5.40331	-0.77627
brain	human	-1.54288	-0.77627
brain	human	-0.669418	-0.77627
brain	human	-3.36412	-0.77627
brain	human	0.495051	-0.77627
brain	human	0.0887656	-0.77627
brain	human	-2.54261	-0.77627
brain	human	2.53828	-0.240581
brain	human	2.21206	-0.240581
brain	human	0.90994	1.05973
brain	human	2.20824	1.05973
brain	human	3.23903	0.763591
brain	human	-0.971467	0.0592679
brain	human	-0.564567	0.0592679
brain	human	1.30394	0.0592679
brain	human	-0.934363	0.0592679
brain	human	1.10183	0.0592679
brain	human	-1.60402	0.0592679
brain	human	-0.00547091	0.397675
brain	human	-0.573877	0.1576
brain	human	0.295058	-0.468352
brain	human	0.478102	-0.468352
brain	human	-0.500802	-0.468352
brain	human	-1.02593	-0.424327
brain	human	1.07169	-0.424327
brain	human	1.71946	-0.424327
brain	human	0.644097	0.674387
brain	human	1.63743	0.893273
brain	human	-1.13209	0.893273
brain	human	3.0926	0.893273
brain	human	-2.30423	0.893273
brain	human	2.3474	-0.134948
brain	human	1.86203	-0.134948
brain	human	1.57807	-0.134948
brain	human	1.73155	-0.134948
brain	human	2.00618	-0.134948
brain	human	-0.742026	-0.134948
brain	human	-0.346018	-0.134948
brain	human	1.37881	-0.134948
brain	human	2.10399	-1.1788
brain	human	2.37979	-1.1788
brain	human	-0.402062	-1.1788
brain	human	-1.5776	-1.1788
brain	human	0.352409	-0.591795
brain	human	-1.38401	1.38916
brain	human	-1.62114	-0.770053
brain	human	-1.79651	-0.770053
brain	human	-1.57523	-0.770053
brain	human	1.11659	-0.770053
brain	human	1.93328	0.298657
brain	human	0.0193144	0.298657
brain	human	-1.44498	0.298657
brain	human	2.03019	0.298657
brain	human	0.658405	0.298657
brain	human	2.40072	-0.46408
brain	human	0.697421	-0.46408
brain	human	1.8677	-0.633545
brain	human	0.334787	0.904616
brain	human	-0.357452	0.904616
brain	human	0.0452503	0.904616
brain	human	1.98164	0.904616
brain	human	0.224163	0.904616
brain	human	-0.166859	0.904616
brain	human	0.464096	-0.662547
brain	human	-2.85361	-0.662547
brain	human	1.38421	-0.782639
brain	human	1.5826	0.626922
brain	human	-1.41145	0.626922
brain	human	-2.66103	-1.14971
brain	human	-0.403634	-1.14971
brain	human	0.418104	-1.14971
brain	human	-3.50999	-1.14971
brain	human	-2.95902	1.26348
brain	human	2.19374	-0.776647
brain	human	1.81503	-0.776647
brain	human	1.57876	0.458129
brain	human	1.5805	0.458129
brain	human	0.597958	0.458129
brain	human	-3.54976	-1.10193
brain	human	-3.29751	-1.10193
brain	human	0.821173	-0.241743
brain	human	1.0796	-0.241743
brain	human	1.69239	2.3615
brain	human	-1.02265	0.694116
brain	human	0.855136	-0.144065
brain	human	-0.836544	-0.144065
brain	human	-0.0610697	-0.144065
brain	human	0.201085	-0.144065
brain	human	-0.407765	-0.144065
brain	human	1.17462	-1.55678
brain	human	-0.731048	0.0216114
brain	human	-2.35307	0.612851
brain	human	-3.30544	0.612851
brain	human	-0.137395	-0.832988
brain	human	-1.46236	-0.557547
brain	human	-0.888429	-0.557547
brain	human	-1.77039	-0.557547
brain	human	1.21435	-0.557547
brain	human	-0.0599024	0.17103
brain	human	-1.81376	0.17103
brain	human	-0.736649	0.17103
brain	human	1.83689	-1.18366
brain	human	4.17557	0.95968
brain	human	-4.54005	0.95968
brain	human	1.744	-0.212744
brain	human	4.08885	-0.212744
brain	human	1.95098	-0.212744
brain	human	-0.415675	-0.212744
brain	human	3.26123	-0.784869
brain	human	-0.378099	0.219961
brain	human	-3.23672	0.219961
brain	human	3.87463	0.219961
brain	human	4.27381	0.219961
brain	human	0.991993	0.219961
brain	human	0.476222	1.02711
brain	human	0.652876	0.609487
brain	human	0.693935	0.609487
brain	human	0.0609571	-0.447845
brain	human	-2.53724	0.0102677
brain	human	-1.59125	-0.031089
brain	human	-0.781517	-0.031089
brain	human	0.616608	-0.031089
brain	human	-0.461577	-0.031089
brain	human	-2.61005	-0.031089
brain	human	-1.29003	-0.031089
brain	human	-2.42889	-0.031089
brain	human	1.14956	-0.031089
brain	human	1.63539	1.33428
brain	human	1.57992	1.33428
brain	human	-0.199041	1.33428
brain	human	-1.04281	1.86532
brain	human	0.767127	0.459932
brain	human	-2.2517	0.459932
brain	human	1.576	-0.154227
brain	human	-3.65159	0.788598
brain	human	-0.421579	1.31931
brain	human	-1.04402	0.704163
brain	human	0.830376	-0.36363
brain	human	-1.30595	-0.168503
brain	human	-0.00547091	0.722933
brain	human	1.20976	-1.35141
brain	human	-2.13134	0.574751
brain	human	-4.19604	0.574751
brain	human	-0.479287	0.574751
brain	human	-3.50075	-0.0878223
brain	human	0.117744	-0.0878223
brain	human	0.825281	1.11185
brain	human	0.575169	1.33494
brain	human	0.57645	1.33494
brain	human	0.52867	1.33494
brain	human	1.05867	1.08615
brain	human	1.21684	1.08615
brain	human	0.839158	1.08615
brain	human	-0.65723	0.204498
brain	human	-0.11881	0.204498
brain	human	0.482423	-0.301339
brain	human	0.213625	-0.301339
brain	human	5.05554	-0.301339
brain	human	-0.845822	-0.301339
brain	human	4.36539	-0.301339
brain	human	-2.99694	0.240153
brain	human	2.97603	-0.671246
brain	human	1.98626	-0.671246
brain	human	1.98717	-0.671246
brain	human	0.0108317	-0.690288
brain	human	-0.891398	0.488993
brain	human	1.21889	0.488993
brain	human	0.467448	0.488993
brain	human	0.866533	0.488993
brain	human	-0.246525	0.488993
brain	human	3.18386	-1.00729
brain	human	2.17194	-1.00729
brain	human	0.652547	-1.00729
brain	human	-0.0322719	-0.840428
brain	human	-0.261298	-0.840428
brain	human	-0.0460635	-0.182641
brain	human	-3.03228	0.404664
brain	human	-2.1967	-1.01973
brain	human	0.416972	-1.01973
brain	human	0.677802	-1.01973
brain	human	3.05811	-0.643023
brain	human	-4.08555	2.47458
brain	human	1.98809	-0.401972
brain	human	0.100518	0.94891
brain	human	3.87166	0.94891
brain	human	0.0996114	1.41968
brain	human	-0.446955	1.41968
brain	human	-1.41542	-0.31389
brain	human	-1.72534	-0.31389
brain	human	0.507043	-0.31389
brain	human	0.517268	-0.31389
brain	human	-0.738574	-0.34898
brain	human	-0.70796	-0.34898
brain	human	-0.143026	-0.34898
brain	human	1.16194	-0.34898
brain	human	0.389333	-0.34898
brain	human	-3.88224	-1.202
brain	human	1.20138	-1.202
brain	human	-0.0621755	0.34837
brain	human	0.783328	-0.45141
brain	human	1.95942	-0.45141
brain	human	1.21458	-0.45141
brain	human	-1.96966	-0.528481
brain	human	1.84304	-0.528481
brain	human	-4.01038	-0.366169
brain	human	1.31384	0.808047
brain	human	2.89141	0.808047
brain	human	4.22083	-0.479169
brain	human	4.21637	-0.479169
brain	human	2.40434	-0.479169
brain	human	-1.39214	0.882235
brain	human	-3.48751	1.4278
brain	human	-0.220319	0.928386
brain	human	0.597958	0.928386
brain	human	0.612713	0.928386
brain	human	-2.61286	0.643815
brain	human	1.57639	0.607296
brain	human	1.57805	0.607296
brain	human	-0.41997	0.13292
brain	human	1.25325	0.13292
brain	human	-0.35501	0.400794
brain	human	-1.63863	1.74113
brain	human	4.4158	1.99732
brain	human	1.24462	0.523587
brain	human	-3.22733	0.523587
brain	human	-3.26814	0.523587
brain	human	0.0333743	0.523587
brain	human	-1.53182	0.523587
brain	human	0.936902	1.21599
brain	human	1.02773	1.21599
brain	human	0.608739	1.21599
brain	human	1.39168	1.21599
brain	human	1.3342	1.21599
brain	human	-0.729386	1.02059
brain	human	-0.303474	0.278304
brain	human	-0.046424	-0.469097
brain	human	-1.56544	-0.469097
brain	human	0.341165	-0.739173
brain	human	0.543994	-0.739173
brain	human	1.38307	-0.739173
brain	human	2.74125	-0.739173
brain	human	3.51608	0.786543
brain	human	-0.0658857	0.0559417
brain	human	0.0882279	1.06682
brain	human	-0.892321	1.06682
brain	human	0.0915682	-0.388061
brain	human	-0.19593	-0.388061
brain	human	-0.259751	-0.388061
brain	human	1.58709	-0.0993157
brain	human	2.56093	-0.965717
brain	human	-0.736509	1.44502
brain	human	0.579886	0.0902726
brain	human	1.86891	0.0902726
brain	human	2.24966	0.0902726
brain	human	-1.55712	0.0902726
brain	human	-1.07642	0.0902726
brain	human	0.179553	0.653549
brain	human	-1.39146	0.653549
brain	human	-0.704172	0.653549
brain	human	-0.0749878	0.653549
brain	human	-0.380691	1.28404
brain	human	-0.584785	0.0856529
brain	human	-0.64109	0.0856529
brain	human	-2.33101	-0.310894
brain	human	-2.97679	-3.49447
brain	human	0.920238	-3.49447
brain	human	-0.617179	-3.49447
brain	human	-0.936545	-3.49447
brain	human	1.10077	-3.49447
brain	human	-0.901992	-3.49447
brain	human	1.68209	-3.49447
brain	human	2.56364	-0.135275
brain	human	1.7977	1.39497
brain	human	1.79749	1.39497
brain	human	2.86091	0.373965
brain	human	3.1741	0.373965
brain	human	0.660219	1.47727
brain	human	1.29673	0.574753
brain	human	0.038934	0.574753
brain	human	-0.288805	0.574753
brain	human	-0.829327	0.574753
brain	human	0.288898	0.574753
brain	human	2.47878	1.41038
brain	human	2.19474	1.00576
brain	human	2.4211	1.00576
brain	human	2.10934	1.00576
brain	human	1.6449	1.00576
brain	human	0.321346	-0.927316
brain	human	-0.469659	0.0156072
brain	human	-3.73188	0.0156072
brain	human	1.77041	-1.05844
brain	human	1.23541	-1.05844
brain	human	0.785472	-1.05844
brain	human	0.735999	-1.05844
brain	human	-2.5412	-1.05844
brain	human	1.32467	-1.05844
brain	human	2.55181	0.298228
brain	human	2.54448	0.298228
brain	human	-1.9551	-2.62411
brain	human	-1.28941	-2.62411
brain	human	-3.71813	-2.62411
brain	human	-2.41507	-2.62411
brain	human	1.47608	-0.231656
brain	human	-2.1258	-0.231656
brain	human	0.774571	-0.231656
brain	human	-0.350821	-1.69174
brain	human	0.148968	-1.69174
brain	human	-1.18928	-1.69174
brain	human	-0.288302	-1.69174
brain	human	-1.73953	-1.69174
brain	human	-0.745817	-1.69174
brain	human	0.0562192	1.17541
brain	human	4.54556	0.524549
brain	human	1.54575	-0.23011
brain	human	-0.535317	-0.23011
brain	human	1.73555	0.283294
brain	human	3.31265	0.283294
brain	human	1.13399	0.283294
brain	human	1.25641	-0.249267
brain	human	-0.761625	-1.02345
brain	human	1.4723	-0.792903
brain	human	-3.12908	-0.792903
brain	human	-2.11084	-0.792903
brain	human	-1.39214	-0.792903
brain	human	0.530008	-0.792903
brain	human	0.0584482	-0.792903
brain	human	-1.33869	-0.792903
brain	human	0.843136	-0.792903
brain	human	-1.00659	-0.792903
brain	human	-1.57523	-0.792903
brain	human	0.659367	1.52348
brain	human	3.35425	1.34026
brain	human	-2.09033	-1.23694
brain	human	-3.46925	-1.23694
brain	human	0.751171	0.175849
brain	human	1.42808	0.175849
brain	human	3.98484	1.64228
brain	human	0.787552	0.767505
brain	human	0.35445	-0.915652
brain	human	-0.513814	-0.915652
brain	human	0.802769	-0.915652
brain	human	0.978135	-0.915652
brain	human	0.232575	-0.915652
brain	human	-0.253183	-1.93274
brain	human	3.10301	-1.93274
brain	human	-1.5821	0.833673
brain	human	-1.1911	0.833673
brain	human	-1.28697	0.833673
brain	human	-3.66583	0.0101735
brain	human	-3.61759	0.0101735
brain	human	-0.695324	-0.467792
brain	human	-0.617693	-0.467792
brain	human	5.16733	0.233273
brain	human	1.17769	0.00466125
brain	human	-0.346021	-0.213039
brain	human	7.33752	0.749532
brain	human	0.800271	0.747765
brain	human	-2.22919	1.16438
brain	human	0.384831	1.16438
brain	human	0.638963	-2.36675
brain	human	0.806205	-1.3741
brain	human	1.43666	-1.3741
brain	human	1.63108	1.83511
brain	human	1.23063	0.22823
brain	human	1.2069	0.22823
brain	human	1.709	0.22823
brain	human	0.322618	0.22823
brain	human	-0.125322	-0.272169
brain	human	0.881291	-0.272169
brain	human	-0.168716	0.436711
brain	human	3.03698	1.7118
brain	human	0.600283	0.316464
brain	human	-1.35906	0.316464
brain	human	-0.274043	0.316464
brain	human	-1.00299	0.316464
brain	human	0.343962	0.316464
brain	human	1.13123	0.824907
brain	human	-1.89498	0.824907
brain	human	-1.48274	0.824907
brain	human	0.874484	0.824907
brain	human	-1.06325	0.824907
brain	human	-1.07598	-0.335158
brain	human	-0.404905	-2.00006
brain	human	-0.0486362	-2.00006
brain	human	1.43792	-2.00006
brain	human	-0.213712	-2.00006
brain	human	1.61621	0.228158
brain	human	1.25487	-0.356757
brain	human	-0.56975	-0.32871
brain	human	1.58886	-0.32871
brain	human	-0.137746	-0.32871
brain	human	-2.59523	1.37906
brain	human	0.0259903	-0.857098
brain	human	-0.146767	-0.857098
brain	human	-0.735947	-0.857098
brain	human	-1.56841	-0.857098
brain	human	-4.51744	-0.557442
brain	human	-4.5594	-0.557442
brain	human	-0.102115	-0.466575
brain	human	0.0594503	-0.466575
brain	human	-0.592824	-1.31391
brain	human	-1.8083	-1.31391
brain	human	0.961616	-1.31391
brain	human	-1.54051	-1.31391
brain	human	0.966955	-1.31391
brain	human	-1.88196	-1.31391
brain	human	-1.88057	-1.31391
brain	human	0.20005	-1.31391
brain	human	-1.06159	-1.31391
brain	human	0.199848	-1.31391
brain	human	-2.85622	-1.31391
brain	human	-3.76118	-1.31391
brain	human	-2.14664	-1.31391
brain	human	-1.50531	-1.31391
brain	human	-1.72395	-1.31391
brain	human	0.734344	0.932139
brain	human	1.22785	1.19838
brain	human	1.4898	1.19838
brain	human	0.884797	1.19838
brain	human	-0.225144	-0.449061
brain	human	-0.328219	0.578022
brain	human	2.0874	1.06107
brain	human	-1.30225	1.06107
brain	human	1.1153	1.06107
brain	human	1.72675	1.06107
brain	human	-3.67234	1.06107
brain	human	1.39066	1.06107
brain	human	1.24983	-0.174517
brain	human	1.68384	-0.174517
brain	human	-0.194755	0.195777
brain	human	-0.82459	0.195777
brain	human	7.40641	2.10069
brain	human	7.59529	2.10069
brain	human	0.765361	1.37967
brain	human	0.836062	1.37967
brain	human	1.83691	-1.10763
brain	human	0.990073	1.52518
brain	human	1.41734	1.52518
brain	human	0.0732811	0.171374
brain	human	1.62255	0.171374
brain	human	-1.76593	-0.0641928
brain	human	1.1936	0.252165
brain	human	2.80455	0.252165
brain	human	2.97238	0.252165
brain	human	-0.599027	0.252165
brain	human	-0.873843	0.252165
brain	human	-0.588912	1.37781
brain	human	0.00948568	1.33579
brain	human	3.61665	1.33579
brain	human	2.66849	0.94113
brain	human	-0.705704	-0.713767
brain	human	3.12671	-0.105172
brain	human	0.0836146	-0.0131618
brain	human	9.38367	-0.432964
brain	human	-1.91478	-0.432964
brain	human	0.19183	0.554063
brain	human	2.99096	0.554063
brain	human	1.33649	0.554063
brain	human	-0.732246	0.554063
brain	human	-0.158816	0.554063
brain	human	-2.24591	0.554063
brain	human	-0.160858	0.554063
brain	human	0.757993	0.578574
brain	human	1.20563	0.459812
brain	human	1.7547	0.459812
brain	human	-2.86381	0.0381825
brain	human	-1.70305	0.0381825
brain	human	-1.15317	0.0381825
brain	human	1.77591	0.0381825
brain	human	-1.68314	0.0381825
brain	human	-1.70132	0.0381825
brain	human	-0.329567	0.0381825
brain	human	-0.789189	0.0381825
brain	human	0.854754	0.0381825
brain	human	1.19803	1.06871
brain	human	1.11138	-0.480059
brain	human	1.57673	1.15743
brain	human	0.00563462	1.15743
brain	human	1.70243	1.15743
brain	human	1.02128	1.15743
brain	human	1.70228	1.15743
brain	human	-0.991345	0.112463
brain	human	2.57286	0.112463
brain	human	-3.15379	0.112463
brain	human	-2.18728	0.112463
brain	human	-0.186939	0.112463
brain	human	-1.28387	0.455422
brain	human	-1.05851	0.455422
brain	human	3.12109	0.455422
brain	human	2.5386	-1.91436
brain	human	0.684487	0.677412
brain	human	-0.219346	0.732762
brain	human	-0.219125	0.732762
brain	human	-0.219566	0.732762
brain	human	2.49853	0.732762
brain	human	-2.42238	-1.05104
brain	human	-3.46925	-1.05104
brain	human	-4.05485	-1.05104
brain	human	1.95543	-1.05104
brain	human	-0.367246	-1.05104
brain	human	1.70069	-1.05104
brain	human	-0.979466	1.1443
brain	human	-2.21901	2.27985
brain	human	0.429562	2.27985
brain	human	0.411826	0.285005
brain	human	0.696281	-0.111501
brain	human	0.856601	-0.22618
brain	human	-0.393253	-0.22618
brain	human	-0.482869	-0.22618
brain	human	-0.449508	-0.216326
brain	human	-0.00753209	-0.216326
brain	human	-0.528129	-0.959219
brain	human	1.19425	-1.60792
brain	human	0.60523	-1.60792
brain	human	-0.267187	-1.60792
brain	human	1.74961	-1.60792
brain	human	0.819482	-1.60792
brain	human	-0.326909	-1.60792
brain	human	1.49153	-1.60792
brain	human	-1.88356	-1.60792
brain	human	1.44016	-1.60792
brain	human	1.28307	-1.60792
brain	human	1.48095	-1.60792
brain	human	1.58993	-1.60792
brain	human	-1.71963	-1.60792
brain	human	1.81333	-1.60792
brain	human	-0.000606483	-1.60792
brain	human	1.77701	-1.60792
brain	human	1.47426	-1.60792
brain	human	1.50961	-1.60792
brain	human	0.445639	-1.60792
brain	human	1.63484	-1.60792
brain	human	0.272487	-1.60792
brain	human	-3.43202	-1.60792
brain	human	0.0168636	-1.60792
brain	human	1.32581	-1.60792
brain	human	-2.03635	-0.447098
brain	human	0.461241	-0.447098
brain	human	0.196538	-0.435206
brain	human	-0.293989	-0.435206
brain	human	0.923941	-0.435206
brain	human	-0.764065	0.0440427
brain	human	0.725557	-0.375626
brain	human	-4.03686	-0.375626
brain	human	-2.65572	-0.375626
brain	human	0.323056	-0.375626
brain	human	-0.0836821	-0.375626
brain	human	-0.0346338	-0.0015748
brain	human	-0.415915	-0.691336
brain	human	-0.415636	-0.691336
brain	human	-0.763068	-0.691336
brain	human	-0.553822	-1.97548
brain	human	0.185115	0.866277
brain	human	-1.16201	0.324414
brain	human	2.20113	0.324414
brain	human	2.78265	0.324414
brain	human	0.870893	-1.31865
brain	human	-1.67292	-1.31865
brain	human	1.09896	-1.14468
brain	human	0.359024	-1.14468
brain	human	2.45333	2.28346
brain	human	2.43393	2.28346
brain	human	3.44444	2.28346
brain	human	-0.34346	1.3747
brain	human	0.00543406	1.3747
brain	human	-2.41512	1.3747
brain	human	2.30956	1.3747
brain	human	0.0108317	1.3747
brain	human	0.318885	1.3747
brain	human	1.87314	1.3747
brain	human	2.51834	-0.246028
brain	human	0.689531	-0.246028
brain	human	1.06431	0.385758
brain	human	0.583789	-0.403816
brain	human	3.73914	0.803077
brain	human	-0.97845	1.64701
brain	human	1.89575	1.64701
brain	human	1.65235	1.64701
brain	human	-0.580451	1.64701
brain	human	-4.61142	1.40751
brain	human	1.66421	1.17738
brain	human	-1.56918	1.17738
brain	human	-0.538566	-1.91335
brain	human	3.51268	0.664184
brain	human	4.46655	0.664184
brain	human	2.37824	0.664184
brain	human	1.57443	0.664184
brain	human	-0.491504	-0.189092
brain	human	0.737316	0.977225
brain	human	-0.336443	-0.735095
brain	human	0.0897466	0.797239
brain	human	2.48012	0.797239
brain	human	2.539	0.695956
brain	human	2.5718	0.144027
brain	human	0.994048	0.757566
brain	human	0.0683363	0.92154
brain	human	-0.0799191	0.572134
brain	human	0.143524	0.572134
brain	human	0.108533	0.609869
brain	human	0.38429	0.609869
brain	human	0.9389	-0.206038
brain	human	-0.29502	-0.206038
brain	human	-0.440702	-0.206038
brain	human	-0.904166	-0.206038
brain	human	-0.0986317	-0.206038
brain	human	-0.383073	-0.206038
brain	human	-1.02429	0.282381
brain	human	-0.291859	0.181046
brain	human	-0.257072	0.181046
brain	human	-1.40294	0.181046
brain	human	0.187461	0.181046
brain	human	-0.693005	-0.126912
brain	human	-1.37968	-0.126912
brain	human	-1.47232	-0.126912
brain	human	1.21437	-0.126912
brain	human	2.79321	-0.156851
brain	human	-0.00802953	0.147915
brain	human	-2.19103	-1.49296
brain	human	-2.03348	-1.49296
brain	human	-1.88662	-1.49296
brain	human	-2.15445	-1.49296
brain	human	-2.27207	-1.49296
brain	human	-3.8805	-1.49296
brain	human	0.129324	-2.17005
brain	human	1.24835	-0.660985
brain	human	-2.26247	-0.660985
brain	human	-2.88458	-0.660985
brain	human	2.40885	-0.660985
brain	human	-1.40703	-0.136791
brain	human	-0.0775157	0.700855
brain	human	-2.75709	-0.125875
brain	human	1.4789	0.431679
brain	human	1.16736	0.431679
brain	human	1.57439	0.431679
brain	human	1.66095	0.431679
brain	human	0.72086	0.431679
brain	human	2.23784	-0.185745
brain	human	-0.451061	-1.26357
brain	human	-1.4112	0.00603231
brain	human	-0.489063	0.575129
brain	human	0.398703	0.575129
brain	human	0.49343	0.575129
brain	human	3.15312	1.04732
brain	human	0.680231	-0.083504
brain	human	0.684863	-0.083504
brain	human	-2.27343	-0.083504
brain	human	0.434091	1.62848
brain	human	-1.4854	0.625875
brain	human	-2.21545	0.625875
brain	human	-0.113694	1.15461
brain	human	2.0915	-0.00828925
brain	human	2.27194	-0.00828925
brain	human	2.62891	-0.00828925
brain	human	0.718196	0.477434
brain	human	1.08543	0.466561
brain	human	2.29046	0.466561
brain	human	3.88774	1.15581
brain	human	0.795811	1.15581
brain	human	-1.29303	1.15581
brain	human	0.486131	1.15581
brain	human	-2.09712	1.15581
brain	human	-0.975677	1.15581
brain	human	1.57401	1.15581
brain	human	-1.24186	1.15581
brain	human	3.39562	1.15581
brain	human	-2.08351	1.15581
brain	human	0.15647	1.15581
brain	human	0.109742	1.15581
brain	human	0.915398	1.15581
brain	human	-0.654457	1.15581
brain	human	1.06428	1.04462
brain	human	0.141611	1.04462
brain	human	-1.87938	-0.227234
brain	human	0.371215	-0.227234
brain	human	0.664597	-0.227234
brain	human	-0.440597	-0.227234
brain	human	2.43019	-2.28821
brain	human	-2.43554	-2.28821
brain	human	2.19378	0.725314
brain	human	1.80857	0.725314
brain	human	-1.30225	0.725314
brain	human	1.25268	0.725314
brain	human	-0.553363	0.448335
brain	human	0.0161933	0.448335
brain	human	0.667689	0.448335
brain	human	-2.15632	0.448335
brain	human	0.104861	-0.807548
brain	human	-1.34098	-1.67188
brain	human	-0.421362	-1.67188
brain	human	-1.85739	-1.67188
brain	human	-2.37297	-1.67188
brain	human	1.91676	-1.67188
brain	human	-2.84136	-1.67188
brain	human	2.0298	-1.67188
brain	human	-1.78683	-1.67188
brain	human	-3.2303	-1.67188
brain	human	-2.60804	-1.67188
brain	human	-3.95031	-1.67188
brain	human	-3.04248	-1.67188
brain	human	-0.708835	-1.67188
brain	human	-0.580451	-1.67188
brain	human	-1.54835	-1.67188
brain	human	-2.20481	-1.67188
brain	human	-0.865388	1.70968
brain	human	-5.07319	-0.202834
brain	human	5.99869	-0.202834
brain	human	-5.11246	-0.202834
brain	human	-2.53474	-0.202834
brain	human	-0.921996	-0.202834
brain	human	1.65248	0.564283
brain	human	-0.571272	0.564283
brain	human	0.00388521	0.564283
brain	human	0.446832	0.564283
brain	human	0.12514	0.564283
brain	human	1.38307	0.729724
brain	human	-0.74237	0.131301
brain	human	0.575583	0.131301
brain	human	-0.746121	0.131301
brain	human	-2.46314	0.131301
brain	human	3.9997	0.131301
brain	human	1.837	0.131301
brain	human	4.15875	0.131301
brain	human	8.39129	0.259514
brain	human	1.26012	0.965166
brain	human	-0.402062	0.412913
brain	human	-0.193744	0.412913
brain	human	0.0928527	-0.467877
brain	human	0.139679	-0.467877
brain	human	-0.747984	-1.15144
brain	human	-0.144385	-1.15144
brain	human	1.08261	1.75568
brain	human	1.63994	1.75568
brain	human	4.35485	-2.51057
brain	human	0.406491	-2.76933
brain	human	0.92174	1.20198
brain	human	-0.577382	-1.65001
brain	human	0.707121	-0.308897
brain	human	2.13991	-0.308897
brain	human	2.77015	-0.893653
brain	human	0.150352	-0.893653
brain	human	0.100336	-0.893653
brain	human	1.11877	-0.893653
brain	human	3.55285	-0.893653
[truncated: 56,886 more rows]
