# Supplementary material for: Upstream open reading frames buffer translational variability during Drosophila evolution and development
Source: eLife. 2025 Jun 6;14:RP104074. doi: 10.7554/eLife.104074 (PMC12143884; doi:10.7554/eLife.104074)
Supplement: Figure 8—figure supplement 3—source data 1. [file elife-104074-fig8-figsupp3-data1.xlsx]

## Sheet: figS31
Tissue	Gene_class	Abs_log2Beta_CDS
liver	No	0.0881605
liver	No	2.48777
liver	No	2.56637
liver	No	0.38651
liver	No	0.570626
liver	No	2.84089
liver	No	0.0552276
liver	No	6.61212
liver	No	0
liver	No	2.55178
liver	No	1.21161
liver	No	0.0199072
liver	No	0.208187
liver	No	1.7179
liver	No	0.00187933
liver	No	0.0479087
liver	No	1.55413
liver	No	1.91555
liver	No	3.58469
liver	No	0.386973
liver	No	0.323215
liver	No	0.628874
liver	No	3.80477
liver	No	0.980529
liver	No	0.0252636
liver	No	0.681486
liver	No	0.636322
liver	No	1.34153
liver	No	0.281134
liver	No	1.02396
liver	No	3.18769
liver	No	0.043697
liver	No	0.370786
liver	No	0.337479
liver	No	0.2442
liver	No	0.611511
liver	No	2.54666
liver	No	0.92756
liver	No	1.81422
liver	No	0.196648
liver	No	1.57324
liver	No	0.409866
liver	No	0.478055
liver	No	2.13992
liver	No	0.810642
liver	No	0.851242
liver	No	0.939614
liver	No	0.63452
liver	No	0.0539168
liver	No	2.26429
liver	No	0.651879
liver	No	1.07071
liver	No	0.178943
liver	No	0.613043
liver	No	2.33221
liver	No	0.517849
liver	No	0.718031
liver	No	1.64613
liver	No	0.777685
liver	No	8.70918
liver	No	0.924054
liver	No	0.0394128
liver	No	2.44265
liver	No	1.6334
liver	No	0.728698
liver	No	0.220071
liver	No	0.591463
liver	No	1.0647
liver	No	0.33769
liver	No	0.0302182
liver	No	0.429451
liver	No	0.499775
liver	No	1.12994
liver	No	0.0398886
liver	No	1.54984
liver	No	0.634486
liver	No	0.800754
liver	No	0.0853616
liver	No	1.28061
liver	No	2.89335
liver	No	0.242739
liver	No	0.507477
liver	No	1.04588
liver	No	1.59666
liver	No	0.00777233
liver	No	0.593567
liver	No	0.818661
liver	No	0.206066
liver	No	4.16874
liver	No	0.162834
liver	No	0.306155
liver	No	0.215973
liver	No	1.22322
liver	No	0.481879
liver	No	0.355673
liver	No	0.025244
liver	No	0.149463
liver	No	0.878942
liver	No	2.07671
liver	No	0.456031
liver	No	0
liver	No	1.43443
liver	No	1.74855
liver	No	2.01915
liver	No	0.607588
liver	No	1.10074
liver	No	0.669563
liver	No	0.285811
liver	No	4.8098
liver	No	0.049845
liver	No	0.7214
liver	No	0.061462
liver	No	0.970979
liver	No	2.29801
liver	No	0.0074785
liver	No	0.186819
liver	No	0.263594
liver	No	0.301934
liver	No	0.285417
liver	No	0.825495
liver	No	0.0195094
liver	No	0.873792
liver	No	0.324411
liver	No	1.27238
liver	No	0.163619
liver	No	0.10984
liver	No	0.0257508
liver	No	5.51925
liver	No	1.66124
liver	No	7.50353
liver	No	0.366946
liver	No	0.0543613
liver	No	0.171052
liver	No	0.0929652
liver	No	0.0762813
liver	No	0.810163
liver	No	1.2381
liver	No	0.293431
liver	No	2.62153
liver	No	0.0759156
liver	No	0.359335
liver	No	0
liver	No	0.0861438
liver	No	0.903546
liver	No	0.00995839
liver	No	0.0522194
liver	No	0.988293
liver	No	0.566554
liver	No	1.46168
liver	No	0.99792
liver	No	0.651787
liver	No	0.207766
liver	No	5.68032
liver	No	0.180497
liver	No	3.03006
liver	No	1.20164
liver	No	0.688429
liver	No	1.39841
liver	No	0.881663
liver	No	0.301433
liver	No	0.625615
liver	No	0.506809
liver	No	0.193913
liver	No	0.69903
liver	No	2.56089
liver	No	5.14641
liver	No	0.80529
liver	No	0.0885235
liver	No	0.453575
liver	No	1.79176
liver	No	0.0312059
liver	No	0.65341
liver	No	1.43907
liver	No	0.704238
liver	No	4.20507
liver	No	0.664641
liver	No	2.06018
liver	No	1.08612
liver	No	0.436818
liver	No	2.08043
liver	No	1.63578
liver	No	0.0048072
liver	No	0.29479
liver	No	2.93047
liver	No	2.91823
liver	No	0.290918
liver	No	0.0906198
liver	No	2.32127
liver	No	0.706204
liver	No	0.467795
liver	No	0.374928
liver	No	0.220828
liver	No	0.940455
liver	No	0.142567
liver	No	0.285771
liver	No	0.0636912
liver	No	0.421612
liver	No	0.220164
liver	No	3.0924
liver	No	0.431606
liver	No	0.865316
liver	No	1.34028
liver	No	0.142394
liver	No	0.739878
liver	No	0.444546
liver	No	1.57031
liver	No	0.624897
liver	No	2.97067
liver	No	0.900481
liver	No	1.68335
liver	No	0.343103
liver	No	0.153763
liver	No	0.468871
liver	No	14.5447
liver	No	4.69931
liver	No	0.871647
liver	No	1.58137
liver	No	1.597
liver	No	1.68253
liver	No	1.01718
liver	No	0.238004
liver	No	0.286059
liver	No	0.506006
liver	No	2.12762
liver	No	0.14365
liver	No	0.367941
liver	No	1.35803
liver	No	0.595039
liver	No	0.0799964
liver	No	0.726264
liver	No	0.558297
liver	No	0.431631
liver	No	0.895395
liver	No	0.174792
liver	No	1.69426
liver	No	1.11347
liver	No	1.28743
liver	No	3.30021
liver	No	0.656859
liver	No	0.028599
liver	No	2.90867
liver	No	2.73962
liver	No	1.00119
liver	No	1.39402
liver	No	0.160023
liver	No	1.34124
liver	No	0.258657
liver	No	0.0507945
liver	No	0.144149
liver	No	0.0642328
liver	No	1.0389
liver	No	0.012685
liver	No	0.754336
liver	No	0.484459
liver	No	0.307251
liver	No	0
liver	No	1.33983
liver	No	0.45966
liver	No	0.975129
liver	No	1.47874
liver	No	1.15428
liver	No	0.260003
liver	No	0.056724
liver	No	0.303188
liver	No	0.840715
liver	No	0.625443
liver	No	0.102221
liver	No	1.83285
liver	No	0.378215
liver	No	5.30037
liver	No	0.801547
liver	No	2.2932
liver	No	0.18505
liver	No	0.284912
liver	No	0.59011
liver	No	2.43474
liver	No	0.538039
liver	No	0.0963371
liver	No	0.0638821
liver	No	0.0290804
liver	No	2.10835
liver	No	0.513026
liver	No	0.207335
liver	No	0.496195
liver	No	1.67941
liver	No	1.7835
liver	No	1.68166
liver	No	0.268402
liver	No	0.878857
liver	No	0.156097
liver	No	1.2796
liver	No	0.644884
liver	No	0.921964
liver	No	1.0087
liver	No	0.0615829
liver	No	0.121361
liver	No	1.45226
liver	No	0.694447
liver	No	0.146544
liver	No	0.655823
liver	No	0.174534
liver	No	2.45823
liver	No	0.168422
liver	No	0.0126561
liver	No	0.253942
liver	No	0.801038
liver	No	2.31176
liver	No	3.29098
liver	No	0.681494
liver	No	3.95971
liver	No	0.322283
liver	No	1.19617
liver	No	1.61248
liver	No	1.02563
liver	No	1.75319
liver	No	0.0908035
liver	No	0.988722
liver	No	1.03017
liver	No	2.24401
liver	No	2.36483
liver	No	0.148751
liver	No	1.07053
liver	No	1.4312
liver	No	1.6944
liver	No	0.459564
liver	No	0.470554
liver	No	1.28884
liver	No	1.3149
liver	No	0.66955
liver	No	0.173525
liver	No	0.150261
liver	No	0.400041
liver	No	1.05986
liver	No	4.48559
liver	No	1.16127
liver	No	0.54126
liver	No	0.906168
liver	No	1.72616
liver	No	1.89869
liver	No	1.71677
liver	No	0.144774
liver	No	0.131398
liver	No	1.03663
liver	No	0.308318
liver	No	2.18593
liver	No	1.47652
liver	No	1.62092
liver	No	2.22384
liver	No	0.904066
liver	No	0
liver	No	0.762661
liver	No	0.0148105
liver	No	2.10614
liver	No	0.089147
liver	No	2.22104
liver	No	1.30348
liver	No	5.08271
liver	No	1.13219
liver	No	0.942164
liver	No	0.0929425
liver	No	0.123134
liver	No	0.181295
liver	No	2.26632
liver	No	1.84527
liver	No	1.3052
liver	No	0.55314
liver	No	0.645328
liver	No	3.12986
liver	No	0.789429
liver	No	0.892316
liver	No	5.84873
liver	No	2.56561
liver	No	0.033796
liver	No	2.50148
liver	No	1.5089
liver	No	1.64635
liver	No	1.3045
liver	No	0.455934
liver	No	0.99356
liver	No	0.285895
liver	No	7.07756
liver	No	0.627247
liver	No	1.25253
liver	No	1.22485
liver	No	0.286336
liver	No	0.0117036
liver	No	1.77364
liver	No	1.22492
liver	No	0.00522981
liver	No	1.71324
liver	No	2.46285
liver	No	0.826051
liver	No	0.00440699
liver	No	3.7722
liver	No	0.249635
liver	No	2.66099
liver	No	1.71038
liver	No	0.237984
liver	No	0.310814
liver	No	2.01613
liver	No	0.0215639
liver	No	2.04736
liver	No	10.4965
liver	No	0.471268
liver	No	4.38109
liver	No	0.00275608
liver	No	0.968394
liver	No	0.114896
liver	No	0.213683
liver	No	0.415337
liver	No	0.190363
liver	No	0.169368
liver	No	1.99363
liver	No	4.19211
liver	No	0.938733
liver	No	0.0265242
liver	No	1.9006
liver	No	0.489101
liver	No	0.955528
liver	No	0.763447
liver	No	1.38932
liver	No	0.906193
liver	No	1.49179
liver	No	4.00579
liver	No	0.125289
liver	No	2.9877
liver	No	0.452113
liver	No	0.405569
liver	No	0.469168
liver	No	3.39843
liver	No	0.862564
liver	No	1.58761
liver	No	3.71062
liver	No	1.86435
liver	No	0.276278
liver	No	0.629173
liver	No	1.49286
liver	No	7.01093
liver	No	2.91834
liver	No	0.294773
liver	No	0.989265
liver	No	5.80994
liver	No	0.194057
liver	No	1.64105
liver	No	1.56241
liver	No	0.967298
liver	No	0.892317
liver	No	0.00242975
liver	No	1.35631
liver	No	1.57639
liver	No	0.0314438
liver	No	0.151304
liver	No	0.665075
liver	No	0.702398
liver	No	0.274194
liver	No	0.129478
liver	No	0.00285132
liver	No	0.0563376
liver	No	3.33264
liver	No	8.01577
liver	No	3.34874
liver	No	0.471781
liver	No	0.348863
liver	No	0.075095
liver	No	0.0327939
liver	No	0.0456033
liver	No	0.718149
liver	No	1.1991
liver	No	0.36085
liver	No	0.501896
liver	No	0.477363
liver	No	1.71733
liver	No	1.55001
liver	No	1.84577
liver	No	1.03593
liver	No	0.111634
liver	No	1.20039
liver	No	0.425498
liver	No	0.197372
liver	No	1.52839
liver	No	0.220563
liver	No	0.268273
liver	No	2.10031
liver	No	1.22124
liver	No	2.28462
liver	No	0.227016
liver	No	2.40051
liver	No	1.26433
liver	No	0.729056
liver	No	0.617266
liver	No	0.995525
liver	No	0.891165
liver	No	0.269287
liver	No	0.265947
liver	No	1.08503
liver	No	2.99371
liver	No	1.63038
liver	No	0.49037
liver	No	0.372232
liver	No	0.268608
liver	No	1.19249
liver	No	2.29223
liver	No	2.30028
liver	No	1.33285
liver	No	0.877855
liver	No	0.705256
liver	No	0.0227852
liver	No	1.96679
liver	No	0.0762602
liver	No	1.52244
liver	No	0.373063
liver	No	1.4216
liver	No	0.12827
liver	No	1.89554
liver	No	1.25254
liver	No	1.34703
liver	No	1.3998
liver	No	0.970953
liver	No	0.673976
liver	No	4.01891
liver	No	4.36583
liver	No	0.481874
liver	No	9.97696
liver	No	1.63736
liver	No	2.00172
liver	No	1.22172
liver	No	0.432012
liver	No	5.52822
liver	No	0.616489
liver	No	0.839768
liver	No	0.0337281
liver	No	1.50783
liver	No	6.0992
liver	No	0.85715
liver	No	1.03061
liver	No	0.242444
liver	No	1.58298
liver	No	0.273937
liver	No	1.60224
liver	No	0.64397
liver	No	0.156281
liver	No	1.52929
liver	No	1.5791
liver	No	0.432453
liver	No	3.74592
liver	No	0.811322
liver	No	1.31367
liver	No	1.09992
liver	No	0.404027
liver	No	0.0219763
liver	No	3.05673
liver	No	0.058914
liver	No	1.38359
liver	No	1.60617
liver	No	0.531682
liver	No	2.96925
liver	No	0.0270396
liver	No	0.0863057
liver	No	1.42243
liver	No	0.196168
liver	No	0.0742383
liver	No	0.692485
liver	No	0.00810848
liver	No	1.16728
liver	No	2.83637
liver	No	0.331767
liver	No	1.88027
liver	No	0.212508
liver	No	1.58878
liver	No	0.220199
liver	No	2.96289
liver	No	0.00538111
liver	No	1.1518
liver	No	0.195299
liver	No	1.12446
liver	No	0.353474
liver	No	0.768498
liver	No	1.90264
liver	No	2.49327
liver	No	0.21444
liver	No	0.785955
liver	No	0.0271303
liver	No	1.88142
liver	No	0.273213
liver	No	0.0271457
liver	No	2.2969
liver	No	2.0147
liver	No	5.19532
liver	No	1.28626
liver	No	1.29035
liver	No	1.06637
liver	No	0.526074
liver	No	1.47395
liver	No	0.215374
liver	No	0.982272
liver	No	1.58107
liver	No	0.733463
liver	No	0.363978
liver	No	9.38305
liver	No	1.58509
liver	No	0.813516
liver	No	1.11603
liver	No	1.84512
liver	No	0.0990251
liver	No	0.71112
liver	No	0.192469
liver	No	0.359318
liver	No	0.65931
liver	No	3.39522
liver	No	0.972886
liver	No	1.4274
liver	No	1.10814
liver	No	0.713521
liver	No	0.978046
liver	No	0.0209929
liver	No	0.0716263
liver	No	0.0376923
liver	No	0.0500936
liver	No	0.451378
liver	No	0.492097
liver	No	0.793774
liver	No	1.15326
liver	No	0.0428187
liver	No	0.251147
liver	No	0.232447
liver	No	0.351362
liver	No	1.52172
liver	No	1.09623
liver	No	0.48963
liver	No	0.286455
liver	No	1.17684
liver	No	0.211732
liver	No	0.043334
liver	No	2.92774
liver	No	0.887615
liver	No	1.71869
liver	No	0.220233
liver	No	0.074154
liver	No	0.519121
liver	No	0.266311
liver	No	0.98811
liver	No	3.17736
liver	No	0.638108
liver	No	1.94697
liver	No	0.411384
liver	No	0.147603
liver	No	0.617704
liver	No	0.51095
liver	No	3.10994
liver	No	1.36912
liver	No	0.249543
liver	No	0.0307767
liver	No	1.11038
liver	No	1.05145
liver	No	0.125729
liver	No	1.26375
liver	No	1.02405
liver	No	0.182661
liver	No	0.293318
liver	No	2.18645
liver	No	2.78382
liver	No	0.725827
liver	No	0.162485
liver	No	0.227048
liver	No	0.104265
liver	No	3.91357
liver	No	0
liver	No	3.22322
liver	No	0.108671
liver	No	3.62935
liver	No	2.26583
liver	No	0.9174
liver	No	2.49965
liver	No	4.87919
liver	No	0.698862
liver	No	3.26476
liver	No	0.00964685
liver	No	3.56357
liver	No	1.98812
liver	No	0.332023
liver	No	0.0151923
liver	No	0
liver	No	1.76163
liver	No	0.287985
liver	No	1.58752
liver	No	0.705207
liver	No	0.224374
liver	No	0.567924
liver	No	0.034271
liver	No	0.510258
liver	No	0.720936
liver	No	0.504853
liver	No	0.966559
liver	No	1.71262
liver	No	2.70787
liver	No	0.645949
liver	No	5.1996
liver	No	0.537884
liver	No	0.221088
liver	No	0.0424241
liver	No	0.729949
liver	No	1.27891
liver	No	0.0986796
liver	No	1.40199
liver	No	0.901323
liver	No	0.0140515
liver	No	0.752267
liver	No	0.9997
liver	No	0.0126687
liver	No	0.775803
liver	No	1.23032
liver	No	0.257553
liver	No	0.288293
liver	No	0.0310491
liver	No	2.20034
liver	No	0.637781
liver	No	0.3223
liver	No	3.03663
liver	No	0.646775
liver	No	0.464188
liver	No	0.0300128
liver	No	0.579971
liver	No	0.233845
liver	No	1.60335
liver	No	0.82575
liver	No	1.50735
liver	No	1.3057
liver	No	2.34667
liver	No	0.073264
liver	No	0.869497
liver	No	0.619906
liver	No	0.436274
liver	No	1.23608
liver	No	0.556023
liver	No	1.30726
liver	No	0.73388
liver	No	1.86616
liver	No	0.0149574
liver	No	1.28705
liver	No	0.479687
liver	No	0.0946547
liver	No	1.23792
liver	No	0.527456
liver	No	0.812737
liver	No	8.52689
liver	No	1.88179
liver	No	0.182316
liver	No	0.790272
liver	No	1.8971
liver	No	0.678547
liver	No	0.126092
liver	No	1.40118
liver	No	0.507357
liver	No	1.26883
liver	No	0.193157
liver	No	0.170544
liver	No	3.9278
liver	No	0.417107
liver	No	0.154987
liver	No	2.59256
liver	No	0.08847
liver	No	0.215394
liver	No	3.45927
liver	No	2.2137
liver	No	0.668671
liver	No	1.7811
liver	No	1.36681
liver	No	2.84682
liver	No	0.158509
liver	No	0.380987
liver	No	1.31098
liver	No	0.448725
liver	No	0.808973
liver	No	0
liver	No	0.754648
liver	No	0.161655
liver	No	1.35075
liver	No	1.36839
liver	No	1.22941
liver	No	1.91324
liver	No	0.194395
liver	No	1.60684
liver	No	0.646842
liver	No	0.31662
liver	No	0.40835
liver	No	0
liver	No	0.431905
liver	No	1.63872
liver	No	1.75751
liver	No	4.15047
liver	No	0.857459
liver	No	0.744592
liver	No	5.97732
liver	No	0.253392
liver	No	1.75381
liver	No	0.0330988
liver	No	0.664057
liver	No	0.968366
liver	No	0.0778977
liver	No	0.352497
liver	No	0.208649
liver	No	0.394105
liver	No	0.655537
liver	No	1.68738
liver	No	0.752164
liver	No	1.45622
liver	No	1.31982
liver	No	0.581865
liver	No	0.224505
liver	No	2.64554
liver	No	3.04074
liver	No	1.66104
liver	No	1.17692
liver	No	2.30327
liver	No	2.10737
liver	No	1.95913
liver	No	2.37059
liver	No	0.570539
liver	No	0.689762
liver	No	1.159
liver	No	0.00538248
liver	No	0.357496
liver	No	1.40043
liver	No	1.93632
liver	No	0.973786
liver	No	1.2484
liver	No	1.78933
liver	No	0.660216
liver	No	0.579664
liver	No	2.06783
liver	No	2.50616
liver	No	0.829416
liver	No	0.204043
liver	No	1.55113
liver	No	3.69424
liver	No	5.37465
liver	No	0.011804
liver	No	1.01399
liver	No	0.903523
liver	No	0.839524
liver	No	0.867826
liver	No	0.76104
liver	No	0.208982
liver	No	0.153309
liver	No	0.594909
liver	No	0.710306
liver	No	0.682456
liver	No	0.952223
liver	No	2.195
liver	No	0.113476
liver	No	0
liver	No	0.0722263
liver	No	0.237698
liver	No	0.494729
liver	No	0.134839
liver	No	0.368796
liver	No	0.0807735
liver	No	2.30423
liver	No	1.43252
liver	No	1.5015
liver	No	1.14129
liver	No	1.0944
liver	No	0.598467
liver	No	1.34153
liver	No	0.596336
liver	No	0.885181
liver	No	0.803543
liver	No	1.73015
liver	No	2.15035
liver	No	1.18294
liver	No	0.581839
liver	No	0.379851
liver	No	0.908906
liver	No	0.190675
liver	No	1.59698
liver	No	0.01409
liver	No	5.08898
liver	No	3.26068
liver	No	0.220587
liver	No	4.84757
liver	No	0.0735712
liver	No	0.338744
liver	No	2.87805
liver	No	0.36681
liver	No	1.70916
liver	No	3.04949
liver	No	2.37851
liver	No	1.48518
liver	No	7.1431
liver	No	0.669522
liver	No	1.22135
liver	No	0.0806687
liver	No	3.8116
liver	No	6.17465
liver	No	3.15531
liver	No	0.512351
liver	No	2.13909
liver	No	2.33007
liver	No	0.0712251
liver	No	0.491787
liver	No	2.22987
liver	No	0.102374
liver	No	1.45385
liver	No	3.58933
liver	No	0.653939
liver	No	0.206033
liver	No	2.10188
liver	No	0.549961
liver	No	0.155219
liver	No	3.48749
liver	No	0.0475934
liver	No	0.478312
liver	No	2.97375
liver	No	1.3045
liver	No	0.361249
liver	No	0.30541
liver	No	0.12076
liver	No	2.6717
liver	No	1.18024
liver	No	0.295445
liver	No	2.86628
liver	No	0.374379
liver	No	1.96884
liver	No	1.20882
liver	No	0.358964
liver	No	0.915511
liver	No	1.84855
liver	No	0.0288929
liver	No	0.588893
liver	No	0.0499871
liver	No	0.668562
liver	No	1.13129
liver	No	0.47577
liver	No	2.13112
liver	No	15.17
liver	No	0.249503
liver	No	2.22373
liver	No	5.34238
liver	No	1.31388
liver	No	1.35278
liver	No	0.725696
liver	No	0.525808
liver	No	1.77933
liver	No	2.90926
liver	No	1.02519
liver	No	0.192314
liver	No	0.648987
liver	No	0.987915
liver	No	1.62216
liver	No	0.195292
liver	No	5.06287
liver	No	1.25284
liver	No	0.339244
liver	No	2.9991
liver	No	0.501888
liver	No	0.372821
liver	No	3.01239
liver	No	0.249409
liver	No	0.496061
liver	No	0.835138
liver	No	2.33847
liver	No	1.35086
liver	No	1.3341
liver	No	0.0434135
liver	No	1.76427
liver	No	0.220181
liver	No	1.64376
liver	No	0.832749
liver	No	1.04609
liver	No	1.21352
liver	No	0.0678397
liver	No	1.66344
liver	No	0.33864
liver	No	0.187698
liver	No	0.294076
liver	No	0.571566
liver	No	6.06503
liver	No	0.775347
liver	No	1.70742
liver	No	4.60353
liver	No	1.34187
liver	No	0.637824
liver	No	0.0118526
liver	No	0.131082
liver	No	1.00639
liver	No	0.894329
liver	No	0.109389
liver	No	1.94773
liver	No	0.0325017
liver	No	1.14205
liver	No	0.656494
liver	No	3.42568
liver	No	0.285509
liver	No	0.00688273
liver	No	2.48755
liver	No	2.0418
liver	No	0.538515
liver	No	0.0207723
liver	No	0.999458
liver	No	1.17535
liver	No	0.0552124
liver	No	2.03556
liver	No	4.38222
liver	No	0.52409
liver	No	0.403332
liver	No	0.0500737
liver	No	1.92445
liver	No	0.174273
liver	No	2.82813
liver	No	2.16217
liver	No	3.24077
liver	No	7.75258
liver	No	1.12281
liver	No	0.27369
liver	No	0.00292192
liver	No	0.0254829
liver	No	0.303659
liver	No	1.278
liver	No	2.07114
liver	No	0.396555
liver	No	4.05245
liver	No	0.0503253
liver	No	0.875057
liver	No	2.58582
liver	No	0.460413
liver	No	5.03489
liver	No	18.5993
liver	No	2.29709
liver	No	0.876411
liver	No	0.115398
liver	No	0.00392322
liver	No	0.034782
liver	No	0.573094
liver	No	0.625382
liver	No	0.303667
liver	No	3.45899
liver	No	0.0686204
liver	No	3.89923
liver	No	0.958434
liver	No	0.557297
liver	No	0.620186
liver	No	0.882434
liver	No	0.983222
liver	No	1.84262
liver	No	3.35363
liver	No	1.25845
liver	No	0.0140874
liver	No	5.29991
liver	No	1.22928
liver	No	0.702911
liver	No	0.665457
liver	No	3.4112
liver	No	1.12582
liver	No	1.66752
liver	No	5.37068
liver	No	0.25656
liver	No	2.27764
liver	No	0.498039
liver	No	0.77196
liver	No	2.61733
liver	No	0.00267207
liver	No	0.769539
liver	No	2.30942
liver	No	2.78797
liver	No	0.458929
liver	No	0.430398
liver	No	0.646737
liver	No	1.54506
liver	No	0.588716
liver	No	1.50069
liver	No	1.4767
liver	No	7.44693
liver	No	0.957103
liver	No	1.86303
liver	No	0.812063
liver	No	0.193611
liver	No	0.15016
liver	No	0.722398
liver	No	1.08215
liver	No	4.2553
liver	No	2.49964
liver	No	1.85342
liver	No	0.581976
liver	No	0.0257278
liver	No	0
liver	No	0.237801
liver	No	1.68451
liver	No	0.751339
liver	No	2.00802
liver	No	0.0759074
liver	No	0.405871
liver	No	0.76586
liver	No	1.15605
liver	No	1.77117
liver	No	0.145483
liver	No	0.570543
liver	No	0.176957
liver	No	0.907358
liver	No	0.290426
liver	No	0.778512
liver	No	0.261196
liver	No	0.698109
liver	No	0.249568
liver	No	0.573734
liver	No	1.27845
liver	No	1.89481
liver	No	0.0378468
liver	No	2.26182
liver	No	3.92735
liver	No	0.192079
liver	No	0.918388
liver	No	0.234851
liver	No	0.946987
liver	No	0.079957
liver	No	0.967791
liver	No	0.0130161
liver	No	0.330656
liver	No	0.430507
liver	No	0.00173438
liver	No	1.4393
liver	No	0.0785469
liver	No	2.43858
liver	No	0.220147
liver	No	0.256344
liver	No	0.0396648
liver	No	3.78107
liver	No	0.114569
liver	No	0.595068
liver	No	1.44077
liver	No	0.91734
liver	No	1.0479
liver	No	1.93023
liver	No	0.366138
liver	No	2.59467
liver	No	0.71014
liver	No	3.42384
liver	No	0.866373
liver	No	0.482545
liver	No	7.45835
liver	No	0.558171
liver	No	0.516579
liver	No	0.724882
liver	No	0.135204
liver	No	1.73734
liver	No	1.04344
liver	No	1.51063
liver	No	0.159345
liver	No	0.228608
liver	No	0.277713
liver	No	0.0416838
liver	No	2.4525
liver	No	0.0818762
liver	No	0.382967
liver	No	0.0200414
liver	No	0.902669
liver	No	0.180537
liver	No	0.91987
liver	No	1.33357
liver	No	0.574069
liver	No	0.00250469
liver	No	0.193709
liver	No	0.925583
liver	No	0.721389
liver	No	0.0316868
liver	No	0.0743291
liver	No	0.357135
liver	No	0.114925
liver	No	4.59358
liver	No	1.04436
liver	No	0.168959
liver	No	1.38706
liver	No	1.54989
liver	No	0.057547
liver	No	0.0231873
liver	No	1.18515
liver	No	1.26318
liver	No	0.214593
liver	No	0.612416
liver	No	0.338033
liver	No	0.171708
liver	No	0.0696367
liver	No	0.444796
liver	No	1.29795
liver	No	0.865797
liver	No	0.113251
liver	No	0.411192
liver	No	0.195444
liver	No	0.316861
liver	No	1.01447
liver	No	1.39091
liver	No	0.367619
liver	No	0.204252
liver	No	0.1779
liver	No	0.173197
liver	No	0.771136
liver	No	0.410883
liver	No	0.0351485
liver	No	0.675126
liver	No	4.84383
liver	No	2.63886
liver	No	3.75042
liver	No	0.0694868
liver	No	1.76756
liver	No	1.09876
liver	No	0.0134284
liver	No	0.0107752
liver	No	0.853514
liver	No	1.17818
liver	No	1.00669
liver	No	1.52399
liver	No	2.41241
liver	No	1.59126
liver	No	1.02686
liver	No	0.288382
liver	No	6.32569
liver	No	0.262447
liver	No	0.17558
liver	No	0.386231
liver	No	0.406124
liver	No	0.69244
liver	No	2.97461
liver	No	5.21236
liver	No	0.513263
liver	No	0.0155783
liver	No	0.12504
liver	No	9.31201
liver	No	1.38143
liver	No	6.54926
liver	No	0.17778
liver	No	1.86765
liver	No	1.31183
liver	No	3.55813
liver	No	0.24683
liver	No	0.340973
liver	No	0.00619504
liver	No	2.07903
liver	No	0
liver	No	2.04212
liver	No	0.0809112
liver	No	1.36773
liver	No	0.0658886
liver	No	0.0698816
liver	No	0.760078
liver	No	1.98276
liver	No	0.294656
liver	No	4.59214
liver	No	1.57672
liver	No	0.380908
liver	No	0.355895
liver	No	0.412152
liver	No	1.04184
liver	No	0.45316
liver	No	0.777919
liver	No	0.0693423
liver	No	0.276232
liver	No	0.106855
liver	No	13.2974
liver	No	0.273035
liver	No	2.01074
liver	No	0.58239
liver	No	0.284157
liver	No	1.29016
liver	No	1.6336
liver	No	1.39858
liver	No	5.77011
liver	No	1.23631
liver	No	1.78443
liver	No	0.0588047
liver	No	0.0365333
liver	No	2.80044
liver	No	0.408898
liver	No	0.967134
liver	No	0.166753
liver	No	0.414931
liver	No	0.484981
liver	No	0.932214
liver	No	0.348632
liver	No	0.725414
liver	No	0.266337
liver	No	1.37198
liver	No	1.53337
liver	No	0.0840898
liver	No	1.99187
liver	No	5.18727
liver	No	0.106268
liver	No	0.229946
liver	No	0.0176626
liver	No	1.42712
liver	No	0.449621
liver	No	0.378132
liver	No	0.137084
liver	No	0.237719
liver	No	1.79076
liver	No	3.4681
liver	No	1.05828
liver	No	0.89636
liver	No	1.89112
liver	No	2.432
liver	No	0.059544
liver	No	1.14964
liver	No	0.919585
liver	No	0.144096
liver	No	0.556082
liver	No	1.15713
liver	No	0.166787
liver	No	0.695438
liver	No	0.829255
liver	No	5.97633
liver	No	1.49876
liver	No	0.564337
liver	No	1.77954
liver	No	1.1233
liver	No	1.77364
liver	No	0.00300739
liver	No	1.67121
liver	No	0.000513463
liver	No	1.52853
liver	No	3.22149
liver	No	5.22529
liver	No	2.25831
liver	No	0.497809
liver	No	0.157031
liver	No	0.646436
liver	No	0.646535
liver	No	1.60992
liver	No	2.04205
liver	No	0.478948
liver	No	0.19616
liver	No	4.34512
liver	No	2.0732
liver	No	0.382755
liver	No	3.15076
liver	No	0.212241
liver	No	1.10924
liver	No	0.732928
liver	No	0.286682
liver	No	1.97329
liver	No	0.512706
liver	No	1.55815
liver	No	2.15495
liver	No	0.182506
liver	No	1.92178
liver	No	0.082139
liver	No	0.381731
liver	No	0.00181002
liver	No	4.11477
liver	No	0.0831338
liver	No	2.717
liver	No	0.000913999
liver	No	0.232141
liver	No	1.10143
liver	No	1.56401
liver	No	0.106718
liver	No	0.768168
liver	No	0.0164081
liver	No	0.589816
liver	No	1.08841
liver	No	0.818235
liver	No	0.589409
liver	No	0.951644
liver	No	1.30744
liver	No	1.13634
liver	No	6.0448
liver	No	1.34544
liver	No	2.55573
liver	No	0.849483
liver	No	1.02512
liver	No	0.839664
liver	No	2.83278
liver	No	2.05404
liver	No	1.20204
liver	No	0.196026
liver	No	0.00327548
liver	No	0.17688
liver	No	0.734459
liver	No	0.367858
liver	No	0.385646
liver	No	0.272203
liver	No	0.997818
liver	No	0.76244
liver	No	1.84369
liver	No	0.644971
liver	No	0.43198
liver	No	0
liver	No	1.39001
liver	No	0.234327
liver	No	2.86175
liver	No	0.140465
liver	No	1.00204
liver	No	0.284848
liver	No	0.22831
liver	No	0.851425
liver	No	1.14313
liver	No	1.46351
liver	No	1.35264
liver	No	0.979088
liver	No	0.0476512
liver	No	0.243885
liver	No	2.23237
liver	No	1.5473
liver	No	0.184669
liver	No	0.0126293
liver	No	0.372838
liver	No	0.659572
liver	No	0.563148
liver	No	0.0837552
liver	No	3.30612
liver	No	0.0906594
liver	No	0.595571
liver	No	0.626269
liver	No	0.335192
liver	No	1.78742
liver	No	0.148413
liver	No	0.278025
liver	No	0.870745
liver	No	0.388374
liver	No	5.12957
liver	No	0.102634
liver	No	1.08224
liver	No	2.1011
liver	No	0.896792
liver	No	3.23917
liver	No	0.181632
liver	No	1.32739
liver	No	0.0605126
liver	No	0.480094
liver	No	3.89776
liver	No	0.035579
liver	No	1.33303
liver	No	0.941293
liver	No	0.129783
liver	No	0.888523
liver	No	0
liver	No	0.608424
liver	No	0.650827
liver	No	2.13237
liver	No	0.0136988
liver	No	1.76904
liver	No	0.0837348
liver	No	1.89199
liver	No	0.528845
liver	No	0.473988
liver	No	0.349088
liver	No	1.40268
liver	No	1.60791
liver	No	1.81452
liver	No	0.570837
liver	No	0
liver	No	2.05213
liver	No	1.49898
liver	No	7.13224
liver	No	0.3941
liver	No	3.21137
liver	No	0.104298
liver	No	1.44097
liver	No	2.13113
liver	No	0.383657
liver	No	3.06148
liver	No	0.508571
liver	No	1.38604
liver	No	0.0678131
liver	No	0.47875
liver	No	2.01872
liver	No	1.82523
liver	No	0.0194439
liver	No	1.34046
liver	No	0.746679
liver	No	0.672769
liver	No	0.26752
liver	No	4.33391
liver	No	0.287535
liver	No	1.9029
liver	No	1.44699
liver	No	0.546106
liver	No	1.4127
liver	No	1.84728
liver	No	2.98735
liver	No	0.00318754
liver	No	3.38762
liver	No	1.72512
liver	No	0.479925
liver	No	0.00378317
liver	No	3.62573
liver	No	1.18438
liver	No	0.205584
liver	No	0.0906244
liver	No	1.36326
liver	No	1.82293
liver	No	4.9719
liver	No	0.158333
liver	No	0.438383
liver	No	1.55561
liver	No	0.502498
liver	No	0.91627
liver	No	0.182612
liver	No	0.505516
liver	No	0.150712
liver	No	0.0970024
liver	No	0.734485
liver	No	0.526877
liver	No	1.00666
liver	No	4.59565
liver	No	2.30334
liver	No	0.755537
liver	No	0.0189255
liver	No	0.0030145
liver	No	0.0159593
liver	No	0.0309206
liver	No	0.84363
liver	No	0.674667
liver	No	0.0695821
liver	No	1.0747
liver	No	3.57963
liver	No	0.305762
liver	No	2.9293
liver	No	0.890427
liver	No	1.38633
liver	No	2.76054
liver	No	0.0687339
liver	No	0.176084
liver	No	0.195286
liver	No	1.05525
liver	No	0.666143
liver	No	0.688271
liver	No	1.04857
liver	No	2.23299
liver	No	1.37325
liver	No	3.32937
liver	No	0.394331
liver	No	0.189471
liver	No	2.91129
liver	No	2.3767
liver	No	0.112351
liver	No	2.10382
liver	No	0.0719849
liver	No	0.302168
liver	No	0.261143
liver	No	0.144039
liver	No	1.15341
liver	No	0.497911
liver	No	1.99367
liver	No	0.716394
liver	No	0.709744
liver	No	0.594861
liver	No	3.81803
liver	No	1.42483
liver	No	1.88129
liver	No	0.234181
liver	No	1.41969
liver	No	0.267187
liver	No	0.0199
liver	No	1.75218
liver	No	2.10355
liver	No	0.458385
liver	No	0.743676
liver	No	0.733264
liver	No	0.467412
liver	No	0.89924
liver	No	0.922816
liver	No	0.551142
liver	No	1.69485
liver	No	0.0105131
liver	No	1.88719
liver	No	1.02426
liver	No	3.40795
liver	No	0.0337873
liver	No	0.109439
liver	No	1.51201
liver	No	1.85421
liver	No	0.176012
liver	No	0.519056
liver	No	0.789278
liver	No	0.927864
liver	No	0.261795
liver	No	0.384334
liver	No	0.340186
liver	No	1.43521
liver	No	0.139841
liver	No	1.32346
liver	No	2.21992
liver	No	0.95932
liver	No	0.99021
liver	No	0.424929
liver	No	4.4628
liver	No	0.544182
liver	No	4.78578
liver	No	0.416918
liver	No	0.264885
liver	No	1.95048
liver	No	1.29941
liver	No	1.59113
liver	No	0.536462
liver	No	0.397173
liver	No	0.821311
liver	No	0.278986
liver	No	3.29056
liver	No	0.667731
liver	No	2.00375
liver	No	0.253505
liver	No	5.13578
liver	No	5.11595
liver	No	2.25193
liver	No	0.564778
liver	No	6.51368
liver	No	1.78871
liver	No	0.0476805
liver	No	1.39807
liver	No	3.6044
liver	No	0.0823993
liver	No	4.05275
liver	No	0.381973
liver	No	0.209642
liver	No	0.798772
liver	No	1.01483
liver	No	10.4846
liver	No	0.408567
liver	No	1.15878
liver	No	0.256621
liver	No	0.0114033
liver	No	1.10613
liver	No	2.14362
liver	No	0.15086
liver	No	1.42096
liver	No	1.46777
liver	No	0.0563398
liver	No	37.4209
liver	No	5.32886
liver	No	2.00622
liver	No	0.540585
liver	No	0.317613
liver	No	0.0923532
liver	No	2.66761
liver	No	0.373624
liver	No	1.07568
liver	No	0.0818226
liver	No	0.378347
liver	No	0.673972
liver	No	1.68107
liver	No	0.19787
liver	No	0.0594185
liver	No	3.54563
liver	No	1.13149
liver	No	0.0534874
liver	No	3.04105
liver	No	0.268909
liver	No	0.608231
liver	No	1.42669
liver	No	1.14925
liver	No	2.00837
liver	No	4.82832
liver	No	0.367496
liver	No	0.00577906
liver	No	0.67741
liver	No	6.27193
liver	No	1.3749
liver	No	0.785545
liver	No	0.584322
liver	No	4.6128
liver	No	1.77821
liver	No	0.572142
liver	No	0.0031907
liver	No	0.227195
liver	No	0.14282
liver	No	0.193132
liver	No	0.442515
liver	No	0.350786
liver	No	3.11583
liver	No	0.153037
liver	No	0.329827
liver	No	0.0349587
liver	No	0.941154
liver	No	0.814922
liver	No	0.669449
liver	No	0.403784
liver	No	0.339537
liver	No	0.2347
liver	No	1.47947
liver	No	0.498628
liver	No	0.346859
liver	No	1.43185
liver	No	0.187437
liver	No	1.36578
liver	No	0.0222173
liver	No	2.1189
liver	No	1.63321
liver	No	0.201594
liver	No	0.403434
liver	No	0.777129
liver	No	0.0109574
liver	No	0.522328
liver	No	0.00440465
liver	No	2.52864
liver	No	2.08558
liver	No	1.19862
liver	No	0.209537
liver	No	0.723101
liver	No	1.51493
liver	No	0.0240868
liver	No	0.989213
liver	No	0.0887777
liver	No	0.159942
liver	No	2.01342
liver	No	8.01952
liver	No	0.0202345
liver	No	1.08523
liver	No	0.57702
liver	No	0.373237
liver	No	0.463454
liver	No	1.85776
liver	No	5.74568
liver	No	0.934391
liver	No	0.721373
liver	No	1.29397
liver	No	0.458381
liver	No	0.443128
liver	No	0.542263
liver	No	1.62622
liver	No	1.94209
liver	No	1.1116
liver	No	4.27692
liver	No	1.15469
liver	No	4.32483
liver	No	1.84124
liver	No	0.121814
liver	No	3.64679
liver	No	0.471193
liver	No	0.685936
liver	No	0.990755
liver	No	0.0457742
liver	No	2.01269
liver	No	0.987617
liver	No	3.47319
liver	No	0.875111
liver	No	0.104693
liver	No	1.02506
liver	No	4.84125
liver	No	0.888445
liver	No	3.97764
liver	No	0.627165
liver	No	0.697606
liver	No	1.10607
liver	No	0.991347
liver	No	0.0163386
liver	No	1.44647
liver	No	0.0504728
liver	No	0.243681
liver	No	3.61506
liver	No	0.340457
liver	No	1.14337
liver	No	0.404483
liver	No	2.05764
liver	No	0.172506
liver	No	0.0545487
liver	No	0.483272
liver	No	0.139579
liver	No	0.182718
liver	No	0.0211069
liver	No	0.132899
liver	No	1.56919
liver	No	0.717182
liver	No	0.07352
liver	No	0.197275
liver	No	0.55801
liver	No	3.34551
liver	No	7.36482
liver	No	0.554521
liver	No	1.92207
liver	No	0.707489
liver	No	10.3324
liver	No	0.66626
liver	No	0.609841
liver	No	0.620044
liver	No	0.0739711
liver	No	4.78675
liver	No	1.29059
liver	No	1.50883
liver	No	2.39999
liver	No	1.52838
liver	No	0.725836
liver	No	1.74807
liver	No	2.21518
liver	No	0.228564
liver	No	1.42389
liver	No	0.42081
liver	No	0.0272703
liver	No	1.53649
liver	No	0.93795
liver	No	1.06486
liver	No	0.0926413
liver	No	1.31868
liver	No	0.314483
liver	No	2.03791
liver	No	4.88988
liver	No	0.0794441
liver	No	0.301401
liver	No	1.24985
liver	No	0.458124
liver	No	0.443119
liver	No	0.136523
liver	No	0.901098
liver	No	0.0108643
liver	No	0.49933
liver	No	0.519013
liver	No	0.366353
liver	No	0
liver	No	2.09071
liver	No	1.0853
liver	No	1.95484
liver	No	0.849491
liver	No	1.27768
liver	No	3.69655
liver	No	0.490921
liver	No	0.00364219
liver	No	0.0523485
liver	No	0.0716487
liver	No	0.817506
liver	No	1.56511
liver	No	0.0469686
liver	No	1.29836
liver	No	0.261506
liver	No	0.422131
liver	No	0.0833813
liver	No	1.23388
liver	No	2.61824
liver	No	2.02104
liver	No	2.45284
liver	No	0.808379
liver	No	3.81062
liver	No	1.23704
liver	No	0.613779
liver	No	0.702821
liver	No	7.24362
liver	No	1.04228
liver	No	0.324901
liver	No	0.417197
liver	No	0.92424
liver	No	0.706266
liver	No	0.179865
liver	No	0.16546
liver	No	0.827818
liver	No	0.0483018
liver	No	0.0683938
liver	No	0.670334
liver	No	1.52894
liver	No	4.90838
liver	No	1.17456
liver	No	0.220498
liver	No	4.60074
liver	No	2.68846
liver	No	0.184622
liver	No	0.0467527
liver	No	0.680986
liver	No	0.523605
liver	No	1.19463
liver	No	0.118538
liver	No	1.15203
liver	No	1.93405
liver	No	4.40025
liver	No	0.525069
liver	No	0.239052
liver	No	0.0716809
liver	No	0.182699
liver	No	0.995873
liver	No	5.91515
liver	No	0.345416
liver	No	0.681865
liver	No	0.00301133
liver	No	2.37432
liver	No	5.75237
liver	No	2.67536
liver	No	0.949468
liver	No	1.13756
liver	No	8.70671
liver	No	0.621514
liver	No	0.343642
liver	No	0.584509
liver	No	1.44632
liver	No	0.895842
liver	No	0.57086
liver	No	3.58319
liver	No	0.691095
liver	No	0.0241929
liver	No	3.06236
liver	No	0.701503
liver	No	0.028664
liver	No	2.96926
liver	No	3.64846
liver	No	0.112607
liver	No	3.35305
liver	No	0.960656
liver	No	1.07258
liver	No	0.770672
liver	No	1.5524
liver	No	0.411164
liver	No	0.0033618
liver	No	1.64773
liver	No	0.209122
liver	No	0.588645
liver	No	0.421378
liver	No	0.959653
liver	No	1.11778
liver	No	0.0522379
liver	No	2.45089
liver	No	0.345834
liver	No	0.202485
liver	No	2.9995
liver	No	4.03134
liver	No	1.78118
liver	No	0.377511
liver	No	5.30413
liver	No	0.0338738
liver	No	3.32997
liver	No	4.97028
liver	No	4.09779
liver	No	1.87233
liver	No	1.85626
liver	No	1.29338
liver	No	0
liver	No	1.45785
liver	No	5.18419
liver	No	1.77542
liver	No	0.667029
liver	No	9.99504
liver	No	0.0464148
liver	No	0
liver	No	3.70671
liver	No	0.225781
liver	No	1.02972
liver	No	0.437076
liver	No	2.8605
liver	No	1.69178
liver	No	0.758304
liver	No	1.9664
liver	No	0.729039
liver	No	0.172207
liver	No	0.0702148
liver	No	0.442168
liver	No	0.626672
liver	No	0.870893
liver	No	0.641262
liver	No	0.0849387
liver	No	0.753388
liver	No	0.660966
liver	No	0.0342397
liver	No	0.671741
liver	No	0.44455
liver	No	10.7076
liver	No	0.104231
liver	No	0.321986
liver	No	1.22987
liver	No	0.0430353
liver	No	1.41721
liver	No	2.46845
liver	No	0.895175
liver	No	2.14516
liver	No	2.55722
liver	No	2.17299
liver	No	0.342894
liver	No	0.502273
liver	No	2.10396
liver	No	0.866895
liver	No	5.51581
liver	No	1.14632
liver	No	0.289983
liver	No	1.64013
liver	No	4.63193
liver	No	0.407227
liver	No	0.407264
liver	No	0.63053
liver	No	0.542734
liver	No	0.0137256
liver	No	0.765823
liver	No	4.84249
liver	No	0.172588
liver	No	1.25496
liver	No	1.26427
liver	No	0.358909
liver	No	0.519893
liver	No	0.379245
liver	No	3.91618
liver	No	0.162383
liver	No	0.448187
liver	No	1.13386
liver	No	0.604241
liver	No	1.24577
liver	No	0.0462355
liver	No	3.72695
liver	No	1.27789
liver	No	0.0333363
liver	No	0.053721
liver	No	0.968409
liver	No	1.10275
liver	No	0.445007
liver	No	1.52189
liver	No	6.19637
liver	No	1.46102
liver	No	15.7533
liver	No	0.0324494
liver	No	2.67099
[truncated: 24,591 more rows]
