# Supplementary material for: Upstream open reading frames buffer translational variability during Drosophila evolution and development
Source: eLife. 2025 Jun 6;14:RP104074. doi: 10.7554/eLife.104074 (PMC12143884; doi:10.7554/eLife.104074)
Supplement: Figure 8—figure supplement 4—source data 1. [file elife-104074-fig8-figsupp4-data1.xlsx]

## Sheet: figS32
Tissue	Gene_class	Gene_id
liver	class1	ENST00000378625
liver	class1	ENST00000377491
liver	class1	ENST00000357898
liver	class1	ENST00000375499
liver	class1	ENST00000374832
liver	class1	ENST00000314011
liver	class1	ENST00000374399
liver	class1	ENST00000357582
liver	class1	ENST00000618852
liver	class1	ENST00000311772
liver	class1	ENST00000373871
liver	class1	ENST00000539896
liver	class1	ENST00000253063
liver	class1	ENST00000373476
liver	class1	ENST00000354858
liver	class1	ENST00000357182
liver	class1	ENST00000373243
liver	class1	ENST00000373036
liver	class1	ENST00000372583
liver	class1	ENST00000255108
liver	class1	ENST00000309519
liver	class1	ENST00000450313
liver	class1	ENST00000372086
liver	class1	ENST00000396478
liver	class1	ENST00000371933
liver	class1	ENST00000354831
liver	class1	ENST00000371614
liver	class1	ENST00000257181
liver	class1	ENST00000072644
liver	class1	ENST00000317868
liver	class1	ENST00000371088
liver	class1	ENST00000370944
liver	class1	ENST00000417775
liver	class1	ENST00000370867
liver	class1	ENST00000370801
liver	class1	ENST00000212355
liver	class1	ENST00000370298
liver	class1	ENST00000370113
liver	class1	ENST00000528667
liver	class1	ENST00000369779
liver	class1	ENST00000357640
liver	class1	ENST00000413052
liver	class1	ENST00000393274
liver	class1	ENST00000369535
liver	class1	ENST00000369528
liver	class1	ENST00000369478
liver	class1	ENST00000369443
liver	class1	ENST00000313835
liver	class1	ENST00000368918
liver	class1	ENST00000368913
liver	class1	ENST00000452671
liver	class1	ENST00000368720
liver	class1	ENST00000318967
liver	class1	ENST00000368521
liver	class1	ENST00000483970
liver	class1	ENST00000448116
liver	class1	ENST00000292180
liver	class1	ENST00000356657
liver	class1	ENST00000423538
liver	class1	ENST00000361813
liver	class1	ENST00000438976
liver	class1	ENST00000271526
liver	class1	ENST00000368192
liver	class1	ENST00000368107
liver	class1	ENST00000368090
liver	class1	ENST00000368073
liver	class1	ENST00000368021
liver	class1	ENST00000368002
liver	class1	ENST00000367993
liver	class1	ENST00000367988
liver	class1	ENST00000489294
liver	class1	ENST00000367922
liver	class1	ENST00000367833
liver	class1	ENST00000367811
liver	class1	ENST00000367772
liver	class1	ENST00000367742
liver	class1	ENST00000236192
liver	class1	ENST00000361951
liver	class1	ENST00000234816
liver	class1	ENST00000271583
liver	class1	ENST00000367607
liver	class1	ENST00000367590
liver	class1	ENST00000367553
liver	class1	ENST00000367549
liver	class1	ENST00000507469
liver	class1	ENST00000318130
liver	class1	ENST00000271588
liver	class1	ENST00000367429
liver	class1	ENST00000320493
liver	class1	ENST00000256785
liver	class1	ENST00000367405
liver	class1	ENST00000442510
liver	class1	ENST00000367242
liver	class1	ENST00000308302
liver	class1	ENST00000367188
liver	class1	ENST00000367182
liver	class1	ENST00000271764
liver	class1	ENST00000367070
liver	class1	ENST00000294811
liver	class1	ENST00000366994
liver	class1	ENST00000366935
liver	class1	ENST00000366899
liver	class1	ENST00000366835
liver	class1	ENST00000366782
liver	class1	ENST00000366669
liver	class1	ENST00000366661
liver	class1	ENST00000366647
liver	class1	ENST00000282841
liver	class1	ENST00000366582
liver	class1	ENST00000318160
liver	class1	ENST00000344293
liver	class1	ENST00000378372
liver	class1	ENST00000436985
liver	class1	ENST00000306006
liver	class1	ENST00000340258
liver	class1	ENST00000344646
liver	class1	ENST00000581492
liver	class1	ENST00000487519
liver	class1	ENST00000614220
liver	class1	ENST00000395348
liver	class1	ENST00000388768
liver	class1	ENST00000609923
liver	class1	ENST00000265872
liver	class1	ENST00000642044
liver	class1	ENST00000357321
liver	class1	ENST00000394829
liver	class1	ENST00000372013
liver	class1	ENST00000265997
liver	class1	ENST00000358935
liver	class1	ENST00000316045
liver	class1	ENST00000224337
liver	class1	ENST00000393760
liver	class1	ENST00000307450
liver	class1	ENST00000370489
liver	class1	ENST00000370418
liver	class1	ENST00000370269
liver	class1	ENST00000260743
liver	class1	ENST00000454061
liver	class1	ENST00000348367
liver	class1	ENST00000356116
liver	class1	ENST00000369405
liver	class1	ENST00000369301
liver	class1	ENST00000648613
liver	class1	ENST00000298746
liver	class1	ENST00000369183
liver	class1	ENST00000333256
liver	class1	ENST00000265978
liver	class1	ENST00000309377
liver	class1	ENST00000379719
liver	class1	ENST00000396602
liver	class1	ENST00000265981
liver	class1	ENST00000256178
liver	class1	ENST00000282032
liver	class1	ENST00000465995
liver	class1	ENST00000334274
liver	class1	ENST00000227868
liver	class1	ENST00000378867
liver	class1	ENST00000278198
liver	class1	ENST00000326737
liver	class1	ENST00000528494
liver	class1	ENST00000311956
liver	class1	ENST00000533524
liver	class1	ENST00000263847
liver	class1	ENST00000227525
liver	class1	ENST00000301764
liver	class1	ENST00000394900
liver	class1	ENST00000377891
liver	class1	ENST00000323646
liver	class1	ENST00000246841
liver	class1	ENST00000279206
liver	class1	ENST00000279263
liver	class1	ENST00000355703
liver	class1	ENST00000376901
liver	class1	ENST00000310999
liver	class1	ENST00000279146
liver	class1	ENST00000301838
liver	class1	ENST00000311131
liver	class1	ENST00000334126
liver	class1	ENST00000289575
liver	class1	ENST00000407242
liver	class1	ENST00000308488
liver	class1	ENST00000650630
liver	class1	ENST00000304511
liver	class1	ENST00000543262
liver	class1	ENST00000325212
liver	class1	ENST00000544612
liver	class1	ENST00000279839
liver	class1	ENST00000393158
liver	class1	ENST00000417449
liver	class1	ENST00000278612
liver	class1	ENST00000375615
liver	class1	ENST00000616540
liver	class1	ENST00000278601
liver	class1	ENST00000440460
liver	class1	ENST00000280346
liver	class1	ENST00000280350
liver	class1	ENST00000393047
liver	class1	ENST00000375549
liver	class1	ENST00000542499
liver	class1	ENST00000438295
liver	class1	ENST00000361763
liver	class1	ENST00000431736
liver	class1	ENST00000648261
liver	class1	ENST00000334418
liver	class1	ENST00000227474
liver	class1	ENST00000527786
liver	class1	ENST00000358825
liver	class1	ENST00000265909
liver	class1	ENST00000396988
liver	class1	ENST00000162749
liver	class1	ENST00000229238
liver	class1	ENST00000307637
liver	class1	ENST00000229332
liver	class1	ENST00000229402
liver	class1	ENST00000617889
liver	class1	ENST00000304084
liver	class1	ENST00000540818
liver	class1	ENST00000320756
liver	class1	ENST00000261349
liver	class1	ENST00000228865
liver	class1	ENST00000261167
liver	class1	ENST00000228936
liver	class1	ENST00000538779
liver	class1	ENST00000381545
liver	class1	ENST00000444129
liver	class1	ENST00000240662
liver	class1	ENST00000381356
liver	class1	ENST00000282884
liver	class1	ENST00000261191
liver	class1	ENST00000229395
liver	class1	ENST00000343028
liver	class1	ENST00000318304
liver	class1	ENST00000256079
liver	class1	ENST00000416848
liver	class1	ENST00000423947
liver	class1	ENST00000429772
liver	class1	ENST00000448372
liver	class1	ENST00000308025
liver	class1	ENST00000267102
liver	class1	ENST00000320634
liver	class1	ENST00000356317
liver	class1	ENST00000416904
liver	class1	ENST00000267082
liver	class1	ENST00000534842
liver	class1	ENST00000449076
liver	class1	ENST00000549117
liver	class1	ENST00000345093
liver	class1	ENST00000266980
liver	class1	ENST00000308197
liver	class1	ENST00000300098
liver	class1	ENST00000257904
liver	class1	ENST00000320743
liver	class1	ENST00000641654
liver	class1	ENST00000228705
liver	class1	ENST00000247843
liver	class1	ENST00000308086
liver	class1	ENST00000261183
liver	class1	ENST00000393240
liver	class1	ENST00000361228
liver	class1	ENST00000266712
liver	class1	ENST00000529983
liver	class1	ENST00000548729
liver	class1	ENST00000552962
liver	class1	ENST00000547098
liver	class1	ENST00000635101
liver	class1	ENST00000388887
liver	class1	ENST00000303694
liver	class1	ENST00000258538
liver	class1	ENST00000008527
liver	class1	ENST00000342494
liver	class1	ENST00000552014
liver	class1	ENST00000261741
liver	class1	ENST00000257566
liver	class1	ENST00000228506
liver	class1	ENST00000392464
liver	class1	ENST00000541212
liver	class1	ENST00000280557
liver	class1	ENST00000320201
liver	class1	ENST00000361479
liver	class1	ENST00000381736
liver	class1	ENST00000379485
liver	class1	ENST00000430805
liver	class1	ENST00000251108
liver	class1	ENST00000378302
liver	class1	ENST00000242827
liver	class1	ENST00000326291
liver	class1	ENST00000377047
liver	class1	ENST00000376673
liver	class1	ENST00000376032
liver	class1	ENST00000376004
liver	class1	ENST00000639435
liver	class1	ENST00000375898
liver	class1	ENST00000261965
liver	class1	ENST00000643469
liver	class1	ENST00000613569
liver	class1	ENST00000262713
liver	class1	ENST00000262710
liver	class1	ENST00000557008
liver	class1	ENST00000446197
liver	class1	ENST00000267426
liver	class1	ENST00000419198
liver	class1	ENST00000288087
liver	class1	ENST00000557854
liver	class1	ENST00000267406
liver	class1	ENST00000216366
liver	class1	ENST00000280979
liver	class1	ENST00000261475
liver	class1	ENST00000361462
liver	class1	ENST00000355765
liver	class1	ENST00000267430
liver	class1	ENST00000305386
liver	class1	ENST00000354586
liver	class1	ENST00000245451
liver	class1	ENST00000413566
liver	class1	ENST00000422976
liver	class1	ENST00000555868
liver	class1	ENST00000337537
liver	class1	ENST00000246166
liver	class1	ENST00000423556
liver	class1	ENST00000553458
liver	class1	ENST00000356357
liver	class1	ENST00000286639
liver	class1	ENST00000555265
liver	class1	ENST00000267622
liver	class1	ENST00000298875
liver	class1	ENST00000341584
liver	class1	ENST00000334708
liver	class1	ENST00000555095
liver	class1	ENST00000526495
liver	class1	ENST00000216277
liver	class1	ENST00000424963
liver	class1	ENST00000361847
liver	class1	ENST00000577949
liver	class1	ENST00000256544
liver	class1	ENST00000328848
liver	class1	ENST00000304330
liver	class1	ENST00000456763
liver	class1	ENST00000622375
liver	class1	ENST00000305641
liver	class1	ENST00000260327
liver	class1	ENST00000316364
liver	class1	ENST00000396444
liver	class1	ENST00000261842
liver	class1	ENST00000438423
liver	class1	ENST00000299638
liver	class1	ENST00000260408
liver	class1	ENST00000559228
liver	class1	ENST00000288235
liver	class1	ENST00000261520
liver	class1	ENST00000310673
liver	class1	ENST00000249842
liver	class1	ENST00000381714
liver	class1	ENST00000286760
liver	class1	ENST00000442287
liver	class1	ENST00000558017
liver	class1	ENST00000618099
liver	class1	ENST00000564065
liver	class1	ENST00000564543
liver	class1	ENST00000326266
liver	class1	ENST00000431561
liver	class1	ENST00000396852
liver	class1	ENST00000268655
liver	class1	ENST00000301744
liver	class1	ENST00000574733
liver	class1	ENST00000381920
liver	class1	ENST00000618327
liver	class1	ENST00000409790
liver	class1	ENST00000381396
liver	class1	ENST00000289416
liver	class1	ENST00000451578
liver	class1	ENST00000268379
liver	class1	ENST00000299853
liver	class1	ENST00000568000
liver	class1	ENST00000356798
liver	class1	ENST00000287461
liver	class1	ENST00000300850
liver	class1	ENST00000356721
liver	class1	ENST00000458059
liver	class1	ENST00000619363
liver	class1	ENST00000300245
liver	class1	ENST00000300291
liver	class1	ENST00000317147
liver	class1	ENST00000304800
liver	class1	ENST00000568396
liver	class1	ENST00000291041
liver	class1	ENST00000261778
liver	class1	ENST00000302516
liver	class1	ENST00000261776
liver	class1	ENST00000393512
liver	class1	ENST00000268483
liver	class1	ENST00000319410
liver	class1	ENST00000258168
liver	class1	ENST00000258169
liver	class1	ENST00000433866
liver	class1	ENST00000572621
liver	class1	ENST00000263092
liver	class1	ENST00000397133
liver	class1	ENST00000574081
liver	class1	ENST00000254868
liver	class1	ENST00000269299
liver	class1	ENST00000318988
liver	class1	ENST00000269305
liver	class1	ENST00000361926
liver	class1	ENST00000584164
liver	class1	ENST00000261643
liver	class1	ENST00000360954
liver	class1	ENST00000302182
liver	class1	ENST00000474627
liver	class1	ENST00000542570
liver	class1	ENST00000406438
liver	class1	ENST00000321765
liver	class1	ENST00000581216
liver	class1	ENST00000300651
liver	class1	ENST00000269571
liver	class1	ENST00000251412
liver	class1	ENST00000361523
liver	class1	ENST00000438323
liver	class1	ENST00000377095
liver	class1	ENST00000332499
liver	class1	ENST00000262419
liver	class1	ENST00000392507
liver	class1	ENST00000584123
liver	class1	ENST00000362042
liver	class1	ENST00000393405
liver	class1	ENST00000586178
liver	class1	ENST00000225275
liver	class1	ENST00000580947
liver	class1	ENST00000393066
liver	class1	ENST00000621829
liver	class1	ENST00000225577
liver	class1	ENST00000310144
liver	class1	ENST00000539111
liver	class1	ENST00000284425
liver	class1	ENST00000590474
liver	class1	ENST00000535240
liver	class1	ENST00000542342
liver	class1	ENST00000335793
liver	class1	ENST00000330793
liver	class1	ENST00000392619
liver	class1	ENST00000335464
liver	class1	ENST00000588479
liver	class1	ENST00000636174
liver	class1	ENST00000318430
liver	class1	ENST00000333676
liver	class1	ENST00000571730
liver	class1	ENST00000261597
liver	class1	ENST00000359446
liver	class1	ENST00000592764
liver	class1	ENST00000283351
liver	class1	ENST00000420878
liver	class1	ENST00000269195
liver	class1	ENST00000399022
liver	class1	ENST00000590986
liver	class1	ENST00000436348
liver	class1	ENST00000256854
liver	class1	ENST00000169551
liver	class1	ENST00000340533
liver	class1	ENST00000356663
liver	class1	ENST00000593052
liver	class1	ENST00000329478
liver	class1	ENST00000545664
liver	class1	ENST00000307741
liver	class1	ENST00000411851
liver	class1	ENST00000586582
liver	class1	ENST00000269856
liver	class1	ENST00000587950
liver	class1	ENST00000245812
liver	class1	ENST00000356762
liver	class1	ENST00000245908
liver	class1	ENST00000414982
liver	class1	ENST00000594797
liver	class1	ENST00000393927
liver	class1	ENST00000591998
liver	class1	ENST00000302851
liver	class1	ENST00000453372
liver	class1	ENST00000270517
liver	class1	ENST00000323169
liver	class1	ENST00000622593
liver	class1	ENST00000590798
liver	class1	ENST00000586534
liver	class1	ENST00000587230
liver	class1	ENST00000263383
liver	class1	ENST00000397410
liver	class1	ENST00000263897
liver	class1	ENST00000359435
liver	class1	ENST00000247706
liver	class1	ENST00000601630
liver	class1	ENST00000514819
liver	class1	ENST00000358491
liver	class1	ENST00000305768
liver	class1	ENST00000627982
liver	class1	ENST00000262626
liver	class1	ENST00000598398
liver	class1	ENST00000532828
liver	class1	ENST00000536220
liver	class1	ENST00000357949
liver	class1	ENST00000324464
liver	class1	ENST00000525771
liver	class1	ENST00000607544
liver	class1	ENST00000434772
liver	class1	ENST00000621083
liver	class1	ENST00000221327
liver	class1	ENST00000221462
liver	class1	ENST00000391945
liver	class1	ENST00000013807
liver	class1	ENST00000353609
liver	class1	ENST00000245932
liver	class1	ENST00000317683
liver	class1	ENST00000317578
liver	class1	ENST00000328771
liver	class1	ENST00000396720
liver	class1	ENST00000253237
liver	class1	ENST00000222122
liver	class1	ENST00000263278
liver	class1	ENST00000598418
liver	class1	ENST00000301399
liver	class1	ENST00000452676
liver	class1	ENST00000221665
liver	class1	ENST00000586929
liver	class1	ENST00000414468
liver	class1	ENST00000321545
liver	class1	ENST00000336128
liver	class1	ENST00000334181
liver	class1	ENST00000596831
liver	class1	ENST00000325134
liver	class1	ENST00000594684
liver	class1	ENST00000306910
liver	class1	ENST00000354590
liver	class1	ENST00000253024
liver	class1	ENST00000398659
liver	class1	ENST00000315212
liver	class1	ENST00000238112
liver	class1	ENST00000381486
liver	class1	ENST00000331243
liver	class1	ENST00000238789
liver	class1	ENST00000435504
liver	class1	ENST00000264710
liver	class1	ENST00000233575
liver	class1	ENST00000337768
liver	class1	ENST00000238831
liver	class1	ENST00000317907
liver	class1	ENST00000402538
liver	class1	ENST00000238823
liver	class1	ENST00000405322
liver	class1	ENST00000282412
liver	class1	ENST00000233146
liver	class1	ENST00000356458
liver	class1	ENST00000616407
liver	class1	ENST00000238714
liver	class1	ENST00000409202
liver	class1	ENST00000282570
liver	class1	ENST00000394070
liver	class1	ENST00000393972
liver	class1	ENST00000377526
liver	class1	ENST00000347055
liver	class1	ENST00000289359
liver	class1	ENST00000617677
liver	class1	ENST00000393414
liver	class1	ENST00000233954
liver	class1	ENST00000341068
liver	class1	ENST00000409871
liver	class1	ENST00000614681
liver	class1	ENST00000327097
liver	class1	ENST00000263710
liver	class1	ENST00000647169
liver	class1	ENST00000259239
liver	class1	ENST00000356140
liver	class1	ENST00000409606
liver	class1	ENST00000295095
liver	class1	ENST00000535373
liver	class1	ENST00000264192
liver	class1	ENST00000263640
liver	class1	ENST00000409175
liver	class1	ENST00000409682
liver	class1	ENST00000333129
liver	class1	ENST00000650372
liver	class1	ENST00000272732
liver	class1	ENST00000544803
liver	class1	ENST00000234453
liver	class1	ENST00000443758
liver	class1	ENST00000264065
liver	class1	ENST00000374866
liver	class1	ENST00000520309
liver	class1	ENST00000409870
liver	class1	ENST00000234296
liver	class1	ENST00000418596
liver	class1	ENST00000423241
liver	class1	ENST00000264276
liver	class1	ENST00000374580
liver	class1	ENST00000449802
liver	class1	ENST00000403263
liver	class1	ENST00000309446
liver	class1	ENST00000265322
liver	class1	ENST00000409618
liver	class1	ENST00000392089
liver	class1	ENST00000409260
liver	class1	ENST00000233055
liver	class1	ENST00000392062
liver	class1	ENST00000410017
liver	class1	ENST00000325385
liver	class1	ENST00000409480
liver	class1	ENST00000488495
liver	class1	ENST00000379400
liver	class1	ENST00000379333
liver	class1	ENST00000303142
liver	class1	ENST00000378886
liver	class1	ENST00000378863
liver	class1	ENST00000254976
liver	class1	ENST00000399002
liver	class1	ENST00000341420
liver	class1	ENST00000377103
liver	class1	ENST00000307677
liver	class1	ENST00000357886
liver	class1	ENST00000374980
liver	class1	ENST00000262650
liver	class1	ENST00000374492
liver	class1	ENST00000414542
liver	class1	ENST00000373448
liver	class1	ENST00000373030
liver	class1	ENST00000372727
liver	class1	ENST00000491381
liver	class1	ENST00000217455
liver	class1	ENST00000372523
liver	class1	ENST00000322927
liver	class1	ENST00000371917
liver	class1	ENST00000262982
liver	class1	ENST00000216923
liver	class1	ENST00000371141
liver	class1	ENST00000652641
liver	class1	ENST00000284987
liver	class1	ENST00000270112
liver	class1	ENST00000270139
liver	class1	ENST00000360214
liver	class1	ENST00000647779
liver	class1	ENST00000647714
liver	class1	ENST00000399744
liver	class1	ENST00000406028
liver	class1	ENST00000248879
liver	class1	ENST00000215739
liver	class1	ENST00000626352
liver	class1	ENST00000407431
liver	class1	ENST00000634017
liver	class1	ENST00000216085
liver	class1	ENST00000397872
liver	class1	ENST00000215838
liver	class1	ENST00000216106
liver	class1	ENST00000433985
liver	class1	ENST00000406856
liver	class1	ENST00000216223
liver	class1	ENST00000356998
liver	class1	ENST00000323205
liver	class1	ENST00000337304
liver	class1	ENST00000454349
liver	class1	ENST00000248929
liver	class1	ENST00000403744
liver	class1	ENST00000216061
liver	class1	ENST00000302036
liver	class1	ENST00000383801
liver	class1	ENST00000430365
liver	class1	ENST00000442415
liver	class1	ENST00000306077
liver	class1	ENST00000443029
liver	class1	ENST00000479665
liver	class1	ENST00000356847
liver	class1	ENST00000333167
liver	class1	ENST00000273158
liver	class1	ENST00000447116
liver	class1	ENST00000264454
liver	class1	ENST00000436261
liver	class1	ENST00000292314
liver	class1	ENST00000296149
liver	class1	ENST00000449376
liver	class1	ENST00000343546
liver	class1	ENST00000273598
liver	class1	ENST00000636166
liver	class1	ENST00000327697
liver	class1	ENST00000443053
liver	class1	ENST00000446044
liver	class1	ENST00000394965
liver	class1	ENST00000311180
liver	class1	ENST00000336596
liver	class1	ENST00000394222
liver	class1	ENST00000361582
liver	class1	ENST00000492406
liver	class1	ENST00000474710
liver	class1	ENST00000264245
liver	class1	ENST00000319172
liver	class1	ENST00000360356
liver	class1	ENST00000322623
liver	class1	ENST00000441626
liver	class1	ENST00000296266
liver	class1	ENST00000356763
liver	class1	ENST00000514044
liver	class1	ENST00000383366
liver	class1	ENST00000260818
liver	class1	ENST00000264951
liver	class1	ENST00000316549
liver	class1	ENST00000296059
liver	class1	ENST00000360632
liver	class1	ENST00000362032
liver	class1	ENST00000359479
liver	class1	ENST00000295930
liver	class1	ENST00000326448
liver	class1	ENST00000264381
liver	class1	ENST00000470487
liver	class1	ENST00000651503
liver	class1	ENST00000316428
liver	class1	ENST00000436636
liver	class1	ENST00000392692
liver	class1	ENST00000471841
liver	class1	ENST00000341319
liver	class1	ENST00000317096
liver	class1	ENST00000639401
liver	class1	ENST00000265022
liver	class1	ENST00000450521
liver	class1	ENST00000361510
liver	class1	ENST00000318037
liver	class1	ENST00000311630
liver	class1	ENST00000314167
liver	class1	ENST00000337872
liver	class1	ENST00000503233
liver	class1	ENST00000264784
liver	class1	ENST00000002596
liver	class1	ENST00000330852
liver	class1	ENST00000264867
liver	class1	ENST00000436693
liver	class1	ENST00000381897
liver	class1	ENST00000264451
liver	class1	ENST00000319234
liver	class1	ENST00000337488
liver	class1	ENST00000257290
liver	class1	ENST00000286657
liver	class1	ENST00000264904
liver	class1	ENST00000237642
liver	class1	ENST00000316355
liver	class1	ENST00000302236
liver	class1	ENST00000395184
liver	class1	ENST00000436978
liver	class1	ENST00000264344
liver	class1	ENST00000394980
liver	class1	ENST00000209668
liver	class1	ENST00000305046
liver	class1	ENST00000515279
liver	class1	ENST00000302274
liver	class1	ENST00000265162
liver	class1	ENST00000458497
liver	class1	ENST00000264808
liver	class1	ENST00000610581
liver	class1	ENST00000335251
liver	class1	ENST00000270861
liver	class1	ENST00000344876
liver	class1	ENST00000274031
liver	class1	ENST00000296575
liver	class1	ENST00000338700
liver	class1	ENST00000536354
liver	class1	ENST00000393807
liver	class1	ENST00000511912
liver	class1	ENST00000296533
liver	class1	ENST00000347613
liver	class1	ENST00000509167
liver	class1	ENST00000359562
liver	class1	ENST00000515030
liver	class1	ENST00000296795
liver	class1	ENST00000511367
liver	class1	ENST00000231420
liver	class1	ENST00000618457
liver	class1	ENST00000274278
liver	class1	ENST00000296603
liver	class1	ENST00000546211
liver	class1	ENST00000265113
liver	class1	ENST00000320816
liver	class1	ENST00000302472
liver	class1	ENST00000263413
liver	class1	ENST00000381298
liver	class1	ENST00000265038
liver	class1	ENST00000334025
liver	class1	ENST00000381070
liver	class1	ENST00000506030
liver	class1	ENST00000256447
liver	class1	ENST00000358731
liver	class1	ENST00000241436
liver	class1	ENST00000428202
liver	class1	ENST00000296641
liver	class1	ENST00000315948
liver	class1	ENST00000265138
liver	class1	ENST00000312637
liver	class1	ENST00000231461
liver	class1	ENST00000542267
liver	class1	ENST00000621003
liver	class1	ENST00000389063
liver	class1	ENST00000257414
liver	class1	ENST00000296859
liver	class1	ENST00000510461
liver	class1	ENST00000398844
liver	class1	ENST00000452510
liver	class1	ENST00000274507
liver	class1	ENST00000618155
liver	class1	ENST00000289269
liver	class1	ENST00000231137
liver	class1	ENST00000316105
liver	class1	ENST00000231173
liver	class1	ENST00000571252
liver	class1	ENST00000398587
liver	class1	ENST00000308177
liver	class1	ENST00000394434
liver	class1	ENST00000506502
liver	class1	ENST00000265271
liver	class1	ENST00000420343
liver	class1	ENST00000265295
liver	class1	ENST00000274811
liver	class1	ENST00000408923
liver	class1	ENST00000519564
liver	class1	ENST00000315073
liver	class1	ENST00000474597
liver	class1	ENST00000379834
liver	class1	ENST00000259939
liver	class1	ENST00000274695
liver	class1	ENST00000329474
liver	class1	ENST00000377791
liver	class1	ENST00000416795
liver	class1	ENST00000244519
liver	class1	ENST00000312541
liver	class1	ENST00000377325
liver	class1	ENST00000376656
liver	class1	ENST00000376560
liver	class1	ENST00000376511
liver	class1	ENST00000376442
liver	class1	ENST00000259895
liver	class1	ENST00000375964
liver	class1	ENST00000375885
liver	class1	ENST00000395287
liver	class1	ENST00000374656
liver	class1	ENST00000451237
liver	class1	ENST00000431845
liver	class1	ENST00000536438
liver	class1	ENST00000373491
liver	class1	ENST00000373479
liver	class1	ENST00000373408
liver	class1	ENST00000633794
liver	class1	ENST00000373113
liver	class1	ENST00000398884
liver	class1	ENST00000341865
liver	class1	ENST00000493763
liver	class1	ENST00000372585
liver	class1	ENST00000372530
liver	class1	ENST00000651428
liver	class1	ENST00000275016
liver	class1	ENST00000468148
liver	class1	ENST00000322507
liver	class1	ENST00000237172
liver	class1	ENST00000237163
liver	class1	ENST00000403245
liver	class1	ENST00000369485
liver	class1	ENST00000522441
liver	class1	ENST00000647811
liver	class1	ENST00000369076
liver	class1	ENST00000369046
liver	class1	ENST00000625458
liver	class1	ENST00000368911
liver	class1	ENST00000368885
liver	class1	ENST00000329970
liver	class1	ENST00000420283
liver	class1	ENST00000368605
liver	class1	ENST00000466444
liver	class1	ENST00000229595
liver	class1	ENST00000483725
liver	class1	ENST00000368149
liver	class1	ENST00000529410
liver	class1	ENST00000275227
liver	class1	ENST00000543571
liver	class1	ENST00000644968
liver	class1	ENST00000422970
liver	class1	ENST00000607772
liver	class1	ENST00000611299
liver	class1	ENST00000320285
liver	class1	ENST00000230256
liver	class1	ENST00000392092
liver	class1	ENST00000397083
liver	class1	ENST00000262041
liver	class1	ENST00000433922
liver	class1	ENST00000428135
liver	class1	ENST00000400331
liver	class1	ENST00000432176
liver	class1	ENST00000647578
liver	class1	ENST00000409980
liver	class1	ENST00000539664
liver	class1	ENST00000222803
liver	class1	ENST00000408931
liver	class1	ENST00000254770
liver	class1	ENST00000355095
liver	class1	ENST00000649664
liver	class1	ENST00000359626
liver	class1	ENST00000257663
liver	class1	ENST00000416283
liver	class1	ENST00000435819
liver	class1	ENST00000265361
liver	class1	ENST00000643230
liver	class1	ENST00000341119
liver	class1	ENST00000389297
liver	class1	ENST00000650585
liver	class1	ENST00000305866
liver	class1	ENST00000416240
liver	class1	ENST00000300181
liver	class1	ENST00000306085
liver	class1	ENST00000223127
liver	class1	ENST00000315322
liver	class1	ENST00000413034
liver	class1	ENST00000339431
liver	class1	ENST00000379263
liver	class1	ENST00000312814
liver	class1	ENST00000257724
liver	class1	ENST00000471770
liver	class1	ENST00000223023
liver	class1	ENST00000393114
liver	class1	ENST00000541284
liver	class1	ENST00000338588
liver	class1	ENST00000330387
liver	class1	ENST00000464848
liver	class1	ENST00000326232
liver	class1	ENST00000335870
liver	class1	ENST00000329630
liver	class1	ENST00000358647
liver	class1	ENST00000297532
liver	class1	ENST00000287878
liver	class1	ENST00000297261
liver	class1	ENST00000409339
liver	class1	ENST00000325203
liver	class1	ENST00000525954
liver	class1	ENST00000361272
liver	class1	ENST00000324849
liver	class1	ENST00000325083
liver	class1	ENST00000454498
liver	class1	ENST00000380586
liver	class1	ENST00000311351
liver	class1	ENST00000487273
liver	class1	ENST00000315792
liver	class1	ENST00000357743
liver	class1	ENST00000220809
liver	class1	ENST00000254250
liver	class1	ENST00000360540
liver	class1	ENST00000303759
liver	class1	ENST00000262146
liver	class1	ENST00000320270
liver	class1	ENST00000357849
liver	class1	ENST00000288368
liver	class1	ENST00000262213
liver	class1	ENST00000284818
liver	class1	ENST00000297265
liver	class1	ENST00000612977
liver	class1	ENST00000401707
liver	class1	ENST00000522439
liver	class1	ENST00000522951
liver	class1	ENST00000518738
liver	class1	ENST00000276659
liver	class1	ENST00000314727
liver	class1	ENST00000378164
liver	class1	ENST00000286234
liver	class1	ENST00000328599
liver	class1	ENST00000303545
liver	class1	ENST00000304916
liver	class1	ENST00000528919
liver	class1	ENST00000292579
liver	class1	ENST00000276893
liver	class1	ENST00000381309
liver	class1	ENST00000319264
liver	class1	ENST00000359039
liver	class1	ENST00000276925
liver	class1	ENST00000380036
liver	class1	ENST00000297990
liver	class1	ENST00000297625
liver	class1	ENST00000297613
liver	class1	ENST00000635942
liver	class1	ENST00000396757
liver	class1	ENST00000396594
liver	class1	ENST00000534928
liver	class1	ENST00000377126
liver	class1	ENST00000377044
liver	class1	ENST00000377031
liver	class1	ENST00000376395
liver	class1	ENST00000545558
liver	class1	ENST00000344604
liver	class1	ENST00000288985
liver	class1	ENST00000374874
liver	class1	ENST00000374767
liver	class1	ENST00000277225
liver	class1	ENST00000374448
liver	class1	ENST00000309235
liver	class1	ENST00000374193
liver	class1	ENST00000450136
liver	class1	ENST00000349780
liver	class1	ENST00000608872
liver	class1	ENST00000373887
liver	class1	ENST00000373768
liver	class1	ENST00000417201
liver	class1	ENST00000373647
liver	class1	ENST00000265960
liver	class1	ENST00000373425
liver	class1	ENST00000372692
liver	class1	ENST00000291900
liver	class1	ENST00000259324
liver	class1	ENST00000372586
liver	class1	ENST00000372491
liver	class1	ENST00000645271
liver	class1	ENST00000380833
liver	class1	ENST00000311912
liver	class1	ENST00000380523
liver	class1	ENST00000380492
liver	class1	ENST00000333590
liver	class1	ENST00000427411
liver	class1	ENST00000379484
liver	class1	ENST00000379270
liver	class1	ENST00000456733
liver	class1	ENST00000276062
liver	class1	ENST00000348411
liver	class1	ENST00000651615
liver	class1	ENST00000495186
liver	class1	ENST00000315869
liver	class1	ENST00000340438
liver	class1	ENST00000375401
liver	class1	ENST00000342160
liver	class1	ENST00000375006
liver	class1	ENST00000425133
liver	class1	ENST00000333933
liver	class1	ENST00000374870
liver	class1	ENST00000204961
liver	class1	ENST00000374552
liver	class1	ENST00000374259
liver	class1	ENST00000374080
liver	class1	ENST00000373539
liver	class1	ENST00000373383
liver	class1	ENST00000373344
liver	class1	ENST00000341864
liver	class1	ENST00000171757
liver	class1	ENST00000373275
liver	class1	ENST00000358130
liver	class1	ENST00000372936
liver	class1	ENST00000372645
liver	class1	ENST00000372626
liver	class1	ENST00000612423
liver	class1	ENST00000465301
liver	class1	ENST00000371936
liver	class1	ENST00000557385
liver	class1	ENST00000434600
liver	class1	ENST00000371315
liver	class1	ENST00000371313
liver	class1	ENST00000356892
liver	class1	ENST00000287295
liver	class1	ENST00000338144
liver	class1	ENST00000625464
liver	class1	ENST00000343004
liver	class1	ENST00000370766
liver	class1	ENST00000369984
liver	class1	ENST00000360256
liver	class1	ENST00000302805
testis	class1	ENST00000378625
testis	class1	ENST00000493964
testis	class1	ENST00000400900
testis	class1	ENST00000376014
testis	class1	ENST00000375679
testis	class1	ENST00000375499
testis	class1	ENST00000374832
testis	class1	ENST00000314011
testis	class1	ENST00000374399
testis	class1	ENST00000374268
testis	class1	ENST00000357582
testis	class1	ENST00000618852
testis	class1	ENST00000311772
testis	class1	ENST00000373871
testis	class1	ENST00000539896
testis	class1	ENST00000253063
testis	class1	ENST00000373836
testis	class1	ENST00000432622
testis	class1	ENST00000373476
testis	class1	ENST00000354858
testis	class1	ENST00000522796
testis	class1	ENST00000488417
testis	class1	ENST00000357182
testis	class1	ENST00000373116
testis	class1	ENST00000373103
testis	class1	ENST00000373036
testis	class1	ENST00000372766
testis	class1	ENST00000340612
testis	class1	ENST00000372525
testis	class1	ENST00000610710
testis	class1	ENST00000255108
testis	class1	ENST00000355387
testis	class1	ENST00000458657
testis	class1	ENST00000372192
testis	class1	ENST00000450313
testis	class1	ENST00000396478
testis	class1	ENST00000372003
testis	class1	ENST00000371933
testis	class1	ENST00000404795
testis	class1	ENST00000354831
testis	class1	ENST00000371614
testis	class1	ENST00000257181
testis	class1	ENST00000072644
testis	class1	ENST00000234831
testis	class1	ENST00000421030
testis	class1	ENST00000371088
testis	class1	ENST00000349533
testis	class1	ENST00000371007
testis	class1	ENST00000370944
testis	class1	ENST00000370867
testis	class1	ENST00000294638
testis	class1	ENST00000370801
testis	class1	ENST00000370580
testis	class1	ENST00000394593
testis	class1	ENST00000370440
testis	class1	ENST00000212355
testis	class1	ENST00000370298
testis	class1	ENST00000370205
testis	class1	ENST00000263174
testis	class1	ENST00000370113
testis	class1	ENST00000369948
testis	class1	ENST00000528667
testis	class1	ENST00000334179
testis	class1	ENST00000369784
testis	class1	ENST00000357640
testis	class1	ENST00000445067
testis	class1	ENST00000369716
testis	class1	ENST00000315987
testis	class1	ENST00000271277
testis	class1	ENST00000369684
testis	class1	ENST00000413052
testis	class1	ENST00000369563
testis	class1	ENST00000393274
testis	class1	ENST00000369535
testis	class1	ENST00000369528
testis	class1	ENST00000369512
testis	class1	ENST00000313835
testis	class1	ENST00000234739
testis	class1	ENST00000439741
testis	class1	ENST00000361824
testis	class1	ENST00000368918
testis	class1	ENST00000368913
testis	class1	ENST00000452671
testis	class1	ENST00000440583
testis	class1	ENST00000368765
testis	class1	ENST00000368720
testis	class1	ENST00000368715
testis	class1	ENST00000318967
testis	class1	ENST00000368623
testis	class1	ENST00000368521
testis	class1	ENST00000483970
testis	class1	ENST00000618040
testis	class1	ENST00000448116
testis	class1	ENST00000368376
testis	class1	ENST00000356657
testis	class1	ENST00000368352
testis	class1	ENST00000462460
testis	class1	ENST00000423538
testis	class1	ENST00000361813
testis	class1	ENST00000295694
testis	class1	ENST00000368255
testis	class1	ENST00000271526
testis	class1	ENST00000368194
testis	class1	ENST00000368192
testis	class1	ENST00000368090
testis	class1	ENST00000368073
testis	class1	ENST00000368002
testis	class1	ENST00000622395
testis	class1	ENST00000367988
testis	class1	ENST00000367940
testis	class1	ENST00000489294
testis	class1	ENST00000367922
testis	class1	ENST00000359842
testis	class1	ENST00000537209
testis	class1	ENST00000367833
testis	class1	ENST00000367811
testis	class1	ENST00000367772
testis	class1	ENST00000367742
testis	class1	ENST00000236192
testis	class1	ENST00000417563
testis	class1	ENST00000333279
testis	class1	ENST00000234816
testis	class1	ENST00000271583
testis	class1	ENST00000367590
testis	class1	ENST00000367549
testis	class1	ENST00000507469
testis	class1	ENST00000304685
testis	class1	ENST00000308641
testis	class1	ENST00000318130
testis	class1	ENST00000271588
testis	class1	ENST00000367440
testis	class1	ENST00000367434
testis	class1	ENST00000367429
testis	class1	ENST00000442510
testis	class1	ENST00000309017
testis	class1	ENST00000391959
testis	class1	ENST00000367188
testis	class1	ENST00000367182
testis	class1	ENST00000367156
testis	class1	ENST00000367153
testis	class1	ENST00000310833
testis	class1	ENST00000367028
testis	class1	ENST00000294811
testis	class1	ENST00000336184
testis	class1	ENST00000366994
testis	class1	ENST00000366960
testis	class1	ENST00000366956
testis	class1	ENST00000366935
testis	class1	ENST00000366835
testis	class1	ENST00000429204
testis	class1	ENST00000366782
testis	class1	ENST00000343776
testis	class1	ENST00000366669
testis	class1	ENST00000366661
testis	class1	ENST00000366647
testis	class1	ENST00000282841
testis	class1	ENST00000366582
testis	class1	ENST00000366542
testis	class1	ENST00000344293
testis	class1	ENST00000378372
testis	class1	ENST00000331161
testis	class1	ENST00000436985
testis	class1	ENST00000302418
testis	class1	ENST00000340258
testis	class1	ENST00000453424
testis	class1	ENST00000344646
testis	class1	ENST00000374317
testis	class1	ENST00000487519
testis	class1	ENST00000614220
testis	class1	ENST00000395348
testis	class1	ENST00000399298
testis	class1	ENST00000358410
testis	class1	ENST00000609923
testis	class1	ENST00000265872
testis	class1	ENST00000645393
testis	class1	ENST00000317376
testis	class1	ENST00000642044
testis	class1	ENST00000357321
testis	class1	ENST00000394829
testis	class1	ENST00000286621
testis	class1	ENST00000372198
testis	class1	ENST00000372013
testis	class1	ENST00000308448
testis	class1	ENST00000371939
testis	class1	ENST00000265997
testis	class1	ENST00000358935
testis	class1	ENST00000371380
testis	class1	ENST00000646931
testis	class1	ENST00000224337
testis	class1	ENST00000357947
testis	class1	ENST00000536831
testis	class1	ENST00000393760
testis	class1	ENST00000370640
testis	class1	ENST00000307450
testis	class1	ENST00000370626
testis	class1	ENST00000370489
testis	class1	ENST00000370269
testis	class1	ENST00000311916
testis	class1	ENST00000405356
testis	class1	ENST00000224862
testis	class1	ENST00000260743
testis	class1	ENST00000454061
testis	class1	ENST00000280155
testis	class1	ENST00000348367
testis	class1	ENST00000356116
testis	class1	ENST00000369405
testis	class1	ENST00000369301
testis	class1	ENST00000648613
testis	class1	ENST00000298746
testis	class1	ENST00000333254
testis	class1	ENST00000553456
testis	class1	ENST00000298622
testis	class1	ENST00000182290
testis	class1	ENST00000333256
testis	class1	ENST00000311659
testis	class1	ENST00000380184
testis	class1	ENST00000309377
testis	class1	ENST00000379719
testis	class1	ENST00000396602
testis	class1	ENST00000265981
testis	class1	ENST00000256178
testis	class1	ENST00000528429
testis	class1	ENST00000349215
testis	class1	ENST00000453096
testis	class1	ENST00000634992
testis	class1	ENST00000454584
testis	class1	ENST00000282032
testis	class1	ENST00000465995
testis	class1	ENST00000452863
testis	class1	ENST00000334274
testis	class1	ENST00000415002
testis	class1	ENST00000227868
testis	class1	ENST00000278198
testis	class1	ENST00000622142
testis	class1	ENST00000528494
testis	class1	ENST00000311956
testis	class1	ENST00000538490
testis	class1	ENST00000533524
testis	class1	ENST00000524669
testis	class1	ENST00000399050
testis	class1	ENST00000263847
testis	class1	ENST00000300190
testis	class1	ENST00000227525
testis	class1	ENST00000313421
testis	class1	ENST00000301764
testis	class1	ENST00000394900
testis	class1	ENST00000377891
testis	class1	ENST00000323646
testis	class1	ENST00000398846
testis	class1	ENST00000279263
testis	class1	ENST00000355703
testis	class1	ENST00000394224
testis	class1	ENST00000312006
testis	class1	ENST00000376901
testis	class1	ENST00000310999
testis	class1	ENST00000533211
testis	class1	ENST00000279146
testis	class1	ENST00000301838
testis	class1	ENST00000311131
testis	class1	ENST00000334126
testis	class1	ENST00000289575
testis	class1	ENST00000356136
testis	class1	ENST00000321844
testis	class1	ENST00000407242
testis	class1	ENST00000376217
testis	class1	ENST00000308488
testis	class1	ENST00000281038
testis	class1	ENST00000298281
testis	class1	ENST00000650630
testis	class1	ENST00000304511
testis	class1	ENST00000543262
testis	class1	ENST00000326402
testis	class1	ENST00000325212
testis	class1	ENST00000407439
testis	class1	ENST00000299001
testis	class1	ENST00000279839
testis	class1	ENST00000335080
testis	class1	ENST00000302259
testis	class1	ENST00000393158
testis	class1	ENST00000531837
testis	class1	ENST00000417449
testis	class1	ENST00000278612
testis	class1	ENST00000375615
testis	class1	ENST00000616540
testis	class1	ENST00000393047
testis	class1	ENST00000375549
testis	class1	ENST00000280358
testis	class1	ENST00000375490
testis	class1	ENST00000361763
testis	class1	ENST00000431736
testis	class1	ENST00000648261
testis	class1	ENST00000334418
testis	class1	ENST00000260187
testis	class1	ENST00000530393
testis	class1	ENST00000533904
testis	class1	ENST00000525144
testis	class1	ENST00000527786
testis	class1	ENST00000265909
testis	class1	ENST00000532889
testis	class1	ENST00000162749
testis	class1	ENST00000229238
testis	class1	ENST00000311268
testis	class1	ENST00000535366
testis	class1	ENST00000299665
testis	class1	ENST00000320756
testis	class1	ENST00000261349
testis	class1	ENST00000228865
testis	class1	ENST00000261167
testis	class1	ENST00000229002
testis	class1	ENST00000317658
testis	class1	ENST00000396037
testis	class1	ENST00000381356
testis	class1	ENST00000242729
testis	class1	ENST00000261191
testis	class1	ENST00000229395
testis	class1	ENST00000343028
testis	class1	ENST00000318304
testis	class1	ENST00000256079
testis	class1	ENST00000324616
testis	class1	ENST00000551295
testis	class1	ENST00000416848
testis	class1	ENST00000423947
testis	class1	ENST00000369367
testis	class1	ENST00000266579
testis	class1	ENST00000548364
testis	class1	ENST00000308025
testis	class1	ENST00000301061
testis	class1	ENST00000267102
testis	class1	ENST00000320634
testis	class1	ENST00000301180
testis	class1	ENST00000548553
testis	class1	ENST00000453097
testis	class1	ENST00000416904
testis	class1	ENST00000267082
testis	class1	ENST00000257863
testis	class1	ENST00000266987
testis	class1	ENST00000540264
testis	class1	ENST00000553116
testis	class1	ENST00000345093
testis	class1	ENST00000308197
testis	class1	ENST00000548043
testis	class1	ENST00000300098
testis	class1	ENST00000266646
testis	class1	ENST00000552740
testis	class1	ENST00000257904
testis	class1	ENST00000320743
testis	class1	ENST00000641654
testis	class1	ENST00000247815
testis	class1	ENST00000247843
testis	class1	ENST00000261183
testis	class1	ENST00000266682
testis	class1	ENST00000393217
testis	class1	ENST00000361228
testis	class1	ENST00000298699
testis	class1	ENST00000266712
testis	class1	ENST00000644744
testis	class1	ENST00000529983
testis	class1	ENST00000548729
testis	class1	ENST00000552962
testis	class1	ENST00000547098
testis	class1	ENST00000324341
testis	class1	ENST00000635101
testis	class1	ENST00000261637
testis	class1	ENST00000307046
testis	class1	ENST00000388887
testis	class1	ENST00000527879
testis	class1	ENST00000303694
testis	class1	ENST00000258538
testis	class1	ENST00000299045
testis	class1	ENST00000342494
testis	class1	ENST00000312777
testis	class1	ENST00000242591
testis	class1	ENST00000546530
testis	class1	ENST00000261741
testis	class1	ENST00000257566
testis	class1	ENST00000228506
testis	class1	ENST00000392464
testis	class1	ENST00000377071
testis	class1	ENST00000355329
testis	class1	ENST00000541212
testis	class1	ENST00000432564
testis	class1	ENST00000280557
testis	class1	ENST00000361479
testis	class1	ENST00000381884
testis	class1	ENST00000405805
testis	class1	ENST00000630972
testis	class1	ENST00000379485
testis	class1	ENST00000310521
testis	class1	ENST00000430805
testis	class1	ENST00000251108
testis	class1	ENST00000378302
testis	class1	ENST00000282026
testis	class1	ENST00000242827
testis	class1	ENST00000326291
testis	class1	ENST00000377047
testis	class1	ENST00000376673
testis	class1	ENST00000442173
testis	class1	ENST00000376032
testis	class1	ENST00000376004
testis	class1	ENST00000602836
testis	class1	ENST00000375898
testis	class1	ENST00000375887
testis	class1	ENST00000261965
testis	class1	ENST00000418511
testis	class1	ENST00000262713
testis	class1	ENST00000361611
testis	class1	ENST00000262710
testis	class1	ENST00000452015
testis	class1	ENST00000216727
testis	class1	ENST00000446197
testis	class1	ENST00000267426
testis	class1	ENST00000419198
testis	class1	ENST00000620473
testis	class1	ENST00000288087
testis	class1	ENST00000557854
testis	class1	ENST00000216366
testis	class1	ENST00000261475
testis	class1	ENST00000258829
testis	class1	ENST00000340446
testis	class1	ENST00000361462
testis	class1	ENST00000355765
testis	class1	ENST00000267430
testis	class1	ENST00000305386
testis	class1	ENST00000321662
testis	class1	ENST00000354586
testis	class1	ENST00000440021
testis	class1	ENST00000355431
testis	class1	ENST00000395159
testis	class1	ENST00000354386
testis	class1	ENST00000216513
testis	class1	ENST00000354886
testis	class1	ENST00000555868
testis	class1	ENST00000332981
testis	class1	ENST00000337537
testis	class1	ENST00000246166
testis	class1	ENST00000636229
testis	class1	ENST00000612183
testis	class1	ENST00000553891
testis	class1	ENST00000423556
testis	class1	ENST00000553458
testis	class1	ENST00000286639
testis	class1	ENST00000393774
testis	class1	ENST00000541158
testis	class1	ENST00000282146
testis	class1	ENST00000256343
testis	class1	ENST00000267622
testis	class1	ENST00000341584
testis	class1	ENST00000334708
testis	class1	ENST00000467132
testis	class1	ENST00000526495
testis	class1	ENST00000554012
testis	class1	ENST00000216277
testis	class1	ENST00000424963
testis	class1	ENST00000577949
testis	class1	ENST00000428041
testis	class1	ENST00000622744
testis	class1	ENST00000383263
testis	class1	ENST00000397766
testis	class1	ENST00000256544
testis	class1	ENST00000328848
testis	class1	ENST00000356321
testis	class1	ENST00000441369
testis	class1	ENST00000560346
testis	class1	ENST00000260402
testis	class1	ENST00000346991
testis	class1	ENST00000304330
testis	class1	ENST00000456763
testis	class1	ENST00000622375
testis	class1	ENST00000568508
testis	class1	ENST00000305641
testis	class1	ENST00000319327
testis	class1	ENST00000417257
testis	class1	ENST00000260327
testis	class1	ENST00000290894
testis	class1	ENST00000565323
testis	class1	ENST00000559471
testis	class1	ENST00000251250
testis	class1	ENST00000396444
testis	class1	ENST00000616326
testis	class1	ENST00000261842
testis	class1	ENST00000261845
testis	class1	ENST00000438423
testis	class1	ENST00000299638
testis	class1	ENST00000260408
testis	class1	ENST00000559228
testis	class1	ENST00000288235
testis	class1	ENST00000561311
testis	class1	ENST00000326648
testis	class1	ENST00000326005
testis	class1	ENST00000261892
testis	class1	ENST00000288840
testis	class1	ENST00000310673
testis	class1	ENST00000300504
testis	class1	ENST00000261921
testis	class1	ENST00000249842
testis	class1	ENST00000567435
testis	class1	ENST00000381714
testis	class1	ENST00000286760
testis	class1	ENST00000565973
testis	class1	ENST00000442287
testis	class1	ENST00000558017
testis	class1	ENST00000314742
testis	class1	ENST00000564543
testis	class1	ENST00000326266
testis	class1	ENST00000431561
testis	class1	ENST00000268655
testis	class1	ENST00000301744
testis	class1	ENST00000246949
testis	class1	ENST00000574733
testis	class1	ENST00000618327
testis	class1	ENST00000409790
testis	class1	ENST00000396516
testis	class1	ENST00000381396
testis	class1	ENST00000289416
testis	class1	ENST00000451578
testis	class1	ENST00000268379
testis	class1	ENST00000299853
testis	class1	ENST00000160827
testis	class1	ENST00000567659
testis	class1	ENST00000568000
testis	class1	ENST00000627059
testis	class1	ENST00000287461
testis	class1	ENST00000324685
testis	class1	ENST00000380310
testis	class1	ENST00000318663
testis	class1	ENST00000300850
testis	class1	ENST00000315678
testis	class1	ENST00000356721
testis	class1	ENST00000458059
testis	class1	ENST00000300245
testis	class1	ENST00000300291
testis	class1	ENST00000360716
testis	class1	ENST00000219301
testis	class1	ENST00000317147
testis	class1	ENST00000433154
testis	class1	ENST00000304800
testis	class1	ENST00000568396
testis	class1	ENST00000572888
testis	class1	ENST00000574912
testis	class1	ENST00000306875
testis	class1	ENST00000302516
testis	class1	ENST00000261776
testis	class1	ENST00000393512
testis	class1	ENST00000268483
testis	class1	ENST00000268482
testis	class1	ENST00000537465
testis	class1	ENST00000199936
testis	class1	ENST00000433866
testis	class1	ENST00000572621
testis	class1	ENST00000397133
testis	class1	ENST00000570836
testis	class1	ENST00000381365
testis	class1	ENST00000254868
testis	class1	ENST00000269299
testis	class1	ENST00000648172
testis	class1	ENST00000318988
testis	class1	ENST00000396628
testis	class1	ENST00000250055
testis	class1	ENST00000269305
testis	class1	ENST00000332439
testis	class1	ENST00000380262
testis	class1	ENST00000226105
testis	class1	ENST00000361926
testis	class1	ENST00000584164
testis	class1	ENST00000262441
testis	class1	ENST00000425538
testis	class1	ENST00000619038
testis	class1	ENST00000464847
testis	class1	ENST00000302182
testis	class1	ENST00000395824
testis	class1	ENST00000313838
testis	class1	ENST00000474627
testis	class1	ENST00000542570
testis	class1	ENST00000477478
testis	class1	ENST00000308406
testis	class1	ENST00000391411
testis	class1	ENST00000321765
testis	class1	ENST00000345068
testis	class1	ENST00000394835
testis	class1	ENST00000581216
testis	class1	ENST00000618940
testis	class1	ENST00000621654
testis	class1	ENST00000225430
testis	class1	ENST00000300651
testis	class1	ENST00000580611
testis	class1	ENST00000269571
testis	class1	ENST00000246672
testis	class1	ENST00000293303
testis	class1	ENST00000264657
testis	class1	ENST00000251412
testis	class1	ENST00000361523
testis	class1	ENST00000438323
testis	class1	ENST00000319977
testis	class1	ENST00000315005
testis	class1	ENST00000332499
testis	class1	ENST00000307275
testis	class1	ENST00000262419
testis	class1	ENST00000362042
testis	class1	ENST00000393405
testis	class1	ENST00000614445
testis	class1	ENST00000225964
testis	class1	ENST00000311378
testis	class1	ENST00000393066
testis	class1	ENST00000621829
testis	class1	ENST00000325752
testis	class1	ENST00000225577
testis	class1	ENST00000310144
testis	class1	ENST00000539111
testis	class1	ENST00000340001
testis	class1	ENST00000284425
testis	class1	ENST00000542342
testis	class1	ENST00000335793
testis	class1	ENST00000330793
testis	class1	ENST00000335464
testis	class1	ENST00000579002
testis	class1	ENST00000636174
testis	class1	ENST00000156626
testis	class1	ENST00000318430
testis	class1	ENST00000584436
testis	class1	ENST00000333676
testis	class1	ENST00000571730
testis	class1	ENST00000333437
testis	class1	ENST00000261597
testis	class1	ENST00000341928
testis	class1	ENST00000306084
testis	class1	ENST00000334049
testis	class1	ENST00000592764
testis	class1	ENST00000283351
testis	class1	ENST00000420878
testis	class1	ENST00000269195
testis	class1	ENST00000399022
testis	class1	ENST00000590986
testis	class1	ENST00000420428
testis	class1	ENST00000649279
testis	class1	ENST00000649336
testis	class1	ENST00000256854
testis	class1	ENST00000312828
testis	class1	ENST00000262150
testis	class1	ENST00000169551
testis	class1	ENST00000340533
testis	class1	ENST00000356663
testis	class1	ENST00000361757
testis	class1	ENST00000593052
testis	class1	ENST00000329478
testis	class1	ENST00000545664
testis	class1	ENST00000586572
testis	class1	ENST00000307741
testis	class1	ENST00000586582
testis	class1	ENST00000269856
testis	class1	ENST00000360614
testis	class1	ENST00000321510
testis	class1	ENST00000356762
testis	class1	ENST00000594797
testis	class1	ENST00000311069
testis	class1	ENST00000393927
testis	class1	ENST00000338257
testis	class1	ENST00000595891
testis	class1	ENST00000591998
testis	class1	ENST00000587557
testis	class1	ENST00000453372
testis	class1	ENST00000316737
testis	class1	ENST00000354882
testis	class1	ENST00000270517
testis	class1	ENST00000334213
testis	class1	ENST00000343325
testis	class1	ENST00000591090
testis	class1	ENST00000322912
testis	class1	ENST00000586534
testis	class1	ENST00000587230
testis	class1	ENST00000263383
testis	class1	ENST00000397410
testis	class1	ENST00000221671
testis	class1	ENST00000248076
testis	class1	ENST00000263897
testis	class1	ENST00000359435
testis	class1	ENST00000601630
testis	class1	ENST00000514819
testis	class1	ENST00000585580
testis	class1	ENST00000311015
testis	class1	ENST00000358491
testis	class1	ENST00000611392
testis	class1	ENST00000585933
testis	class1	ENST00000430256
testis	class1	ENST00000415930
testis	class1	ENST00000627982
testis	class1	ENST00000404801
testis	class1	ENST00000262626
testis	class1	ENST00000598398
testis	class1	ENST00000379026
testis	class1	ENST00000588831
testis	class1	ENST00000333987
testis	class1	ENST00000425673
testis	class1	ENST00000357949
testis	class1	ENST00000301218
testis	class1	ENST00000525771
testis	class1	ENST00000607544
testis	class1	ENST00000434772
testis	class1	ENST00000590612
testis	class1	ENST00000590089
testis	class1	ENST00000614049
testis	class1	ENST00000221327
testis	class1	ENST00000221462
testis	class1	ENST00000245932
testis	class1	ENST00000317683
testis	class1	ENST00000317578
testis	class1	ENST00000245934
testis	class1	ENST00000601498
testis	class1	ENST00000328771
testis	class1	ENST00000253237
testis	class1	ENST00000222122
testis	class1	ENST00000263278
testis	class1	ENST00000200453
testis	class1	ENST00000595661
testis	class1	ENST00000598418
testis	class1	ENST00000500065
testis	class1	ENST00000452676
testis	class1	ENST00000598513
testis	class1	ENST00000221665
testis	class1	ENST00000586929
testis	class1	ENST00000537055
testis	class1	ENST00000321545
testis	class1	ENST00000336128
testis	class1	ENST00000307658
testis	class1	ENST00000334181
testis	class1	ENST00000596831
testis	class1	ENST00000325134
testis	class1	ENST00000594684
testis	class1	ENST00000425570
testis	class1	ENST00000306910
testis	class1	ENST00000354590
testis	class1	ENST00000253024
testis	class1	ENST00000398659
testis	class1	ENST00000315212
testis	class1	ENST00000238112
testis	class1	ENST00000381486
testis	class1	ENST00000331243
testis	class1	ENST00000281043
testis	class1	ENST00000233468
testis	class1	ENST00000435504
testis	class1	ENST00000264710
testis	class1	ENST00000296096
testis	class1	ENST00000296097
testis	class1	ENST00000493344
testis	class1	ENST00000233575
testis	class1	ENST00000337768
testis	class1	ENST00000238831
testis	class1	ENST00000238823
testis	class1	ENST00000379066
testis	class1	ENST00000409978
testis	class1	ENST00000233146
testis	class1	ENST00000406846
testis	class1	ENST00000401408
testis	class1	ENST00000616407
testis	class1	ENST00000238714
testis	class1	ENST00000295121
testis	class1	ENST00000234313
testis	class1	ENST00000282570
testis	class1	ENST00000545030
testis	class1	ENST00000394070
testis	class1	ENST00000361874
testis	class1	ENST00000393972
testis	class1	ENST00000377526
testis	class1	ENST00000233668
testis	class1	ENST00000409668
testis	class1	ENST00000347055
testis	class1	ENST00000303254
testis	class1	ENST00000303236
testis	class1	ENST00000425953
testis	class1	ENST00000289359
testis	class1	ENST00000617677
testis	class1	ENST00000393437
testis	class1	ENST00000393414
testis	class1	ENST00000233954
testis	class1	ENST00000409871
testis	class1	ENST00000541869
testis	class1	ENST00000614681
testis	class1	ENST00000295206
testis	class1	ENST00000327097
testis	class1	ENST00000263710
testis	class1	ENST00000647169
testis	class1	ENST00000259239
testis	class1	ENST00000264157
testis	class1	ENST00000409606
testis	class1	ENST00000295095
testis	class1	ENST00000535373
testis	class1	ENST00000243326
testis	class1	ENST00000264192
testis	class1	ENST00000392783
testis	class1	ENST00000409682
testis	class1	ENST00000360534
testis	class1	ENST00000392701
testis	class1	ENST00000272732
testis	class1	ENST00000313173
testis	class1	ENST00000234453
testis	class1	ENST00000443758
testis	class1	ENST00000304636
testis	class1	ENST00000409870
testis	class1	ENST00000234296
testis	class1	ENST00000418596
testis	class1	ENST00000405148
testis	class1	ENST00000449802
testis	class1	ENST00000309446
testis	class1	ENST00000620139
testis	class1	ENST00000265322
testis	class1	ENST00000522678
testis	class1	ENST00000454775
testis	class1	ENST00000432688
testis	class1	ENST00000409618
testis	class1	ENST00000409260
testis	class1	ENST00000305409
testis	class1	ENST00000233055
testis	class1	ENST00000410017
testis	class1	ENST00000325385
testis	class1	ENST00000409480
testis	class1	ENST00000392018
testis	class1	ENST00000488495
testis	class1	ENST00000381867
testis	class1	ENST00000651531
testis	class1	ENST00000380593
testis	class1	ENST00000379756
testis	class1	ENST00000245960
testis	class1	ENST00000379400
testis	class1	ENST00000379333
testis	class1	ENST00000303142
testis	class1	ENST00000378886
testis	class1	ENST00000378863
testis	class1	ENST00000254976
testis	class1	ENST00000399002
testis	class1	ENST00000337743
testis	class1	ENST00000535822
testis	class1	ENST00000377475
testis	class1	ENST00000377103
testis	class1	ENST00000347397
testis	class1	ENST00000246012
testis	class1	ENST00000340513
testis	class1	ENST00000398022
testis	class1	ENST00000357886
testis	class1	ENST00000359606
testis	class1	ENST00000374980
testis	class1	ENST00000262650
testis	class1	ENST00000374492
testis	class1	ENST00000373973
testis	class1	ENST00000373448
testis	class1	ENST00000361337
testis	class1	ENST00000373030
testis	class1	ENST00000372868
testis	class1	ENST00000651288
testis	class1	ENST00000217455
testis	class1	ENST00000372523
testis	class1	ENST00000372409
testis	class1	ENST00000322927
testis	class1	ENST00000371917
testis	class1	ENST00000262982
testis	class1	ENST00000371621
testis	class1	ENST00000217086
testis	class1	ENST00000216923
testis	class1	ENST00000360314
testis	class1	ENST00000371141
testis	class1	ENST00000252998
testis	class1	ENST00000266068
testis	class1	ENST00000652641
testis	class1	ENST00000284987
testis	class1	ENST00000270112
testis	class1	ENST00000270139
testis	class1	ENST00000381831
testis	class1	ENST00000356577
testis	class1	ENST00000609713
testis	class1	ENST00000360214
testis	class1	ENST00000647779
testis	class1	ENST00000398208
testis	class1	ENST00000399744
testis	class1	ENST00000248879
testis	class1	ENST00000215739
testis	class1	ENST00000626352
testis	class1	ENST00000543184
testis	class1	ENST00000407431
testis	class1	ENST00000403880
testis	class1	ENST00000634017
testis	class1	ENST00000216085
testis	class1	ENST00000340552
testis	class1	ENST00000216106
testis	class1	ENST00000405442
testis	class1	ENST00000433985
testis	class1	ENST00000405091
testis	class1	ENST00000216223
testis	class1	ENST00000356998
testis	class1	ENST00000323205
testis	class1	ENST00000337304
testis	class1	ENST00000454349
testis	class1	ENST00000248929
testis	class1	ENST00000216237
testis	class1	ENST00000403744
testis	class1	ENST00000302036
testis	class1	ENST00000412055
testis	class1	ENST00000383801
testis	class1	ENST00000430365
testis	class1	ENST00000442415
testis	class1	ENST00000306077
testis	class1	ENST00000253697
testis	class1	ENST00000443029
testis	class1	ENST00000321169
testis	class1	ENST00000328405
testis	class1	ENST00000479665
testis	class1	ENST00000356847
testis	class1	ENST00000333167
testis	class1	ENST00000273158
testis	class1	ENST00000311042
testis	class1	ENST00000447116
testis	class1	ENST00000339296
testis	class1	ENST00000301831
testis	class1	ENST00000327628
testis	class1	ENST00000287748
testis	class1	ENST00000264454
testis	class1	ENST00000446977
testis	class1	ENST00000436261
testis	class1	ENST00000322734
testis	class1	ENST00000344387
testis	class1	ENST00000296091
testis	class1	ENST00000292314
testis	class1	ENST00000296149
testis	class1	ENST00000449376
testis	class1	ENST00000343546
testis	class1	ENST00000332780
testis	class1	ENST00000273598
testis	class1	ENST00000327697
testis	class1	ENST00000320431
testis	class1	ENST00000443053
testis	class1	ENST00000446044
testis	class1	ENST00000456080
testis	class1	ENST00000648640
testis	class1	ENST00000311180
testis	class1	ENST00000538065
testis	class1	ENST00000417314
testis	class1	ENST00000394222
testis	class1	ENST00000489752
testis	class1	ENST00000265260
testis	class1	ENST00000325805
testis	class1	ENST00000361582
testis	class1	ENST00000295756
testis	class1	ENST00000431670
testis	class1	ENST00000305815
testis	class1	ENST00000492406
testis	class1	ENST00000206423
testis	class1	ENST00000474710
testis	class1	ENST00000264245
[truncated: 24,591 more rows]
