# Supplementary material for: Upstream open reading frames buffer translational variability during Drosophila evolution and development
Source: eLife. 2025 Jun 6;14:RP104074. doi: 10.7554/eLife.104074 (PMC12143884; doi:10.7554/eLife.104074)
Supplement: Figure 8—figure supplement 5—source data 1. [file elife-104074-fig8-figsupp5-data1.xlsx]

## Sheet: FigS33A
Gene_class	CDS_TE_CV
No	0.654438
No	1.37971
No	1.02767
No	0.286465
No	5.51443
No	0.81916
No	0.784921
No	0.831109
No	0.782041
No	0.894084
No	1.35807
No	1.92876
No	4.5892
No	0.579644
No	0.539576
No	1.70201
No	3.78355
No	6.91082
No	1.16387
No	1.30465
No	2.82324
No	3.78608
No	1.78601
No	0.617039
No	1.70776
No	3.26286
No	0.425205
No	3.32609
No	1.24564
No	1.50775
No	1.57507
No	1.27321
No	0
No	2.53162
No	2.45401
No	1.48318
No	2.1604
No	2.66373
No	1.54716
No	2.1725
No	2.74853
No	1.84718
No	3.60314
No	6.44506
No	3.94578
No	1.32037
No	2.67332
No	1.81593
No	1.36273
No	0.567909
No	8.25848
No	0.633284
No	0.398072
No	1.1611
No	4.74351
No	0.583937
No	0
No	8.68098
No	0.618351
No	1.985
No	0.954603
No	2.11545
No	9.13729
No	4.25683
No	0.919359
No	0.514131
No	2.39599
No	0.525037
No	0.807703
No	2.51192
No	1.0479
No	2.50959
No	3.90864
No	1.27753
No	1.52775
No	4.42002
No	2.15587
No	1.04622
No	1.15816
No	0.48791
No	1.21022
No	1.38853
No	0.539807
No	2.23
No	2.7402
No	0.67454
No	1.7939
No	0.498984
No	1.40029
No	2.49603
No	0.66831
No	4.58549
No	0.916204
No	1.76776
No	3.30069
No	4.86502
No	1.44761
No	2.53706
No	2.56351
No	2.70558
No	0.532735
No	0.489607
No	9.13729
No	1.63944
No	4.08212
No	3.62552
No	2.11975
No	1.51413
No	2.00154
No	2.2063
No	0.660388
No	1.07169
No	5.69669
No	0.62277
No	0.883679
No	0.594834
No	0.499577
No	2.90718
No	1.71549
No	1.37868
No	2.93807
No	9.13729
No	0.913877
No	1.55703
No	0.411269
No	0.836336
No	1.47129
No	1.35178
No	1.68496
No	0.497371
No	0.75829
No	3.34866
No	2.85897
No	2.07911
No	9.13729
No	4.57234
No	0.827188
No	0.799678
No	0.612769
No	0.876248
No	0.414934
No	0.448305
No	2.56368
No	3.14871
No	0.870471
No	9.13729
No	1.42256
No	2.5435
No	2.34208
No	2.32452
No	0.613698
No	6.91011
No	1.78874
No	0.975364
No	4.00113
No	0.692321
No	1.09329
No	1.17275
No	3.45254
No	1.0064
No	2.73759
No	2.56729
No	1.64265
No	5.03786
No	3.54324
No	0.631895
No	1.49859
No	0.465085
No	1.14869
No	0.995339
No	1.22458
No	1.45233
No	0.599619
No	7.99334
No	1.19091
No	1.28142
No	1.61955
No	0.91848
No	3.72073
No	2.87614
No	2.09093
No	1.39488
No	0.572237
No	0.473014
No	2.23536
No	2.07163
No	1.61268
No	2.08713
No	2.00605
No	2.07147
No	1.5453
No	3.58008
No	0.574263
No	0.594369
No	1.19489
No	1.27616
No	0.796486
No	1.70891
No	1.95718
No	1.62037
No	0.888938
No	0.513198
No	0.786518
No	2.28522
No	1.20303
No	9.13729
No	0.925042
No	9.13729
No	4.34419
No	5.86402
No	2.41022
No	1.33857
No	3.14373
No	4.164
No	4.97558
No	2.60481
No	2.30969
No	0.751985
No	0.504552
No	4.17063
No	2.1671
No	1.45109
No	0.365639
No	2.44463
No	1.31797
No	3.48527
No	4.86207
No	2.02015
No	1.23823
No	5.66461
No	2.10702
No	3.32137
No	0.8555
No	1.47944
No	1.94469
No	0.856006
No	1.09465
No	1.04164
No	0.511803
No	1.47888
No	1.15392
No	0.606331
No	4.0574
No	2.12683
No	4.62267
No	2.49964
No	1.8294
No	0.828824
No	1.73725
No	0.687241
No	1.19446
No	1.11513
No	0.445854
No	4.46223
No	1.91878
No	3.29347
No	2.48808
No	0.70405
No	1.60099
No	2.2441
No	1.50327
No	1.28536
No	3.34245
No	2.79849
No	0.591961
No	1.81452
No	2.47987
No	2.42875
No	2.14831
No	2.74787
No	2.12117
No	0.682639
No	1.95369
No	0.732896
No	0.716923
No	1.78945
No	1.0213
No	1.66055
No	1.84248
No	2.296
No	3.19444
No	3.44072
No	1.075
No	0.571644
No	1.24719
No	2.81116
No	0.423515
No	0.871615
No	1.87586
No	2.48006
No	2.02522
No	1.86478
No	0.409284
No	5.88025
No	1.75077
No	1.21052
No	0
No	9.13729
No	0.864486
No	2.67214
No	1.07442
No	0.376806
No	0.393565
No	0.996227
No	1.44236
No	1.73114
No	0.843062
No	1.39235
No	1.40913
No	1.4991
No	0.677774
No	0.496143
No	2.24632
No	2.05859
No	4.12191
No	1.63198
No	0.568305
No	0.609048
No	2.19917
No	1.99898
No	1.20138
No	0.561345
No	1.23525
No	6.41638
No	1.74739
No	0.925705
No	4.51889
No	0.597713
No	0.954716
No	2.40026
No	5.31171
No	0.447339
No	0.405412
No	1.67164
No	1.57494
No	1.52946
No	1.71805
No	0.363824
No	3.44651
No	1.20455
No	0.682304
No	0.679656
No	1.13115
No	0.986052
No	1.40731
No	0.666771
No	0.611132
No	1.9174
No	0.974945
No	0.70147
No	1.89541
No	0.436891
No	1.38009
No	0.503144
No	2.49901
No	3.01672
No	7.70051
No	0.857205
No	0.735133
No	0.878092
No	0.612983
No	0.841754
No	2.17352
No	0.924664
No	2.42443
No	0.755034
No	0.724323
No	1.96251
No	1.19026
No	9.13729
No	1.77184
No	1.50183
No	3.27536
No	0.84657
No	0.500026
No	1.52643
No	9.13729
No	5.18157
No	1.57906
No	1.96483
No	0
No	2.6629
No	2.66823
No	0.570212
No	1.29774
No	0.865135
No	1.5552
No	1.22853
No	0.758376
No	1.45917
No	1.03107
No	6.74588
No	1.57461
No	0.653105
No	8.70449
No	0.888822
No	2.69758
No	2.0506
No	7.28762
No	6.41355
No	1.43487
No	0.717029
No	0.422246
No	1.32396
No	2.5821
No	1.91461
No	3.17798
No	3.43897
No	0.863741
No	0.84379
No	0.91695
No	1.87062
No	2.19053
No	0.477276
No	1.37943
No	0.374791
No	2.88682
No	8.21122
No	0
No	2.259
No	1.59524
No	1.19204
No	1.48875
No	3.18237
No	1.22067
No	0.809197
No	0.425924
No	0
No	1.50225
No	2.17566
No	1.18093
No	3.949
No	0.367106
No	0.883729
No	1.74577
No	1.22272
No	0.557232
No	2.77352
No	0.858796
No	9.13729
No	0.290413
No	1.85628
No	1.81101
No	4.18169
No	3.17117
No	2.80624
No	1.261
No	1.97311
No	0.96567
No	2.51309
No	0.412596
No	1.60373
No	0.942122
No	2.72949
No	1.77993
No	0.661204
No	1.02039
No	1.20128
No	0.640511
No	0.673707
No	0.646899
No	8.20791
No	0.904959
No	5.87622
No	4.58469
No	0.551583
No	0.450504
No	1.96477
No	0.928785
No	0.313313
No	1.56997
No	0.836259
No	1.54164
No	2.24516
No	3.48529
No	1.75556
No	1.39313
No	0.693842
No	4.58003
No	1.3402
No	4.01946
No	0.573542
No	0.929221
No	0.443682
No	6.25615
No	0.289756
No	0.600626
No	1.72058
No	0
No	0.900057
No	2.84498
No	0.618332
No	0.752207
No	3.99808
No	2.94613
No	0.619276
No	2.2666
No	3.86759
No	0.833726
No	7.0048
No	1.24059
No	0.498565
No	6.01191
No	5.20333
No	1.08209
No	2.74415
No	1.67742
No	3.3587
No	1.41102
No	2.00202
No	2.02312
No	1.62988
No	0.441225
No	1.87536
No	0.377571
No	1.94088
No	2.62464
No	0.776666
No	1.37547
No	6.06163
No	0.665905
No	1.88685
No	1.6646
No	2.54085
No	2.68081
No	2.66807
No	1.41313
No	0.831191
No	1.3077
No	0.588135
No	0.349465
No	2.56995
No	1.28384
No	2.39099
No	0.419692
No	1.18589
No	0.320285
No	0.999546
No	0.74096
No	0.495192
No	3.03491
No	0.438616
No	0.695942
No	0.980698
No	7.42386
No	9.13729
No	3.94151
No	2.68164
No	3.31837
No	1.47848
No	0.883758
No	2.87608
No	2.73663
No	4.6946
No	1.2623
No	2.5339
No	0.567212
No	4.47652
No	0.571883
No	0.493189
No	0.447873
No	0.474205
No	0.522156
No	1.43339
No	0.50431
No	0.987341
No	0.50543
No	2.75708
No	1.69373
No	1.18524
No	1.58593
No	0.402516
No	5.4565
No	0.991777
No	0.693173
No	1.65114
No	4.28393
No	2.46281
No	1.12049
No	0.692743
No	1.66107
No	1.63279
No	0.584047
No	1.01102
No	1.583
No	1.58147
No	9.13729
No	1.39714
No	3.81085
No	3.46784
No	4.89672
No	1.47398
No	2.51777
No	2.38392
No	4.29831
No	1.07453
No	2.1606
No	3.91179
No	0.48525
No	0.870315
No	0
No	1.05633
No	0.985857
No	2.53869
No	2.00509
No	4.21324
No	2.81625
No	1.50149
No	2.17281
No	0.653045
No	0.754317
No	1.16481
No	2.58032
No	1.23595
No	3.73911
No	2.63241
No	2.3407
No	0.738937
No	1.40398
No	1.45667
No	0.481969
No	0.796206
No	1.86831
No	1.05128
No	0.632285
No	2.10844
No	4.50016
No	0.51298
No	3.97051
No	1.17957
No	1.30601
No	3.47712
No	1.30572
No	4.02947
No	1.51614
No	1.58343
No	1.70557
No	2.41417
No	2.64822
No	1.96126
No	1.44345
No	1.92294
No	1.35521
No	1.2464
No	1.54462
No	1.42297
No	1.75785
No	3.05944
No	0.748909
No	2.2015
No	3.71281
No	5.99181
No	1.76506
No	1.6192
No	0.81511
No	2.86097
No	1.43019
No	1.27593
No	0.698264
No	3.1724
No	0.755938
No	3.33278
No	2.11368
No	0.552706
No	2.63213
No	2.95934
No	1.45075
No	0.440196
No	1.13771
No	2.91886
No	3.01766
No	0.42111
No	1.82768
No	0.553321
No	0.954031
No	2.48834
No	1.96475
No	3.47833
No	0.670438
No	0.948743
No	1.05796
No	4.84338
No	5.31394
No	4.15804
No	1.1042
No	0.454151
No	0.579625
No	0.590573
No	1.55991
No	2.0718
No	0.455359
No	2.70111
No	1.74668
No	1.3616
No	1.78897
No	1.89575
No	1.86394
No	3.02676
No	4.69186
No	1.33565
No	1.41216
No	2.22345
No	4.23253
No	4.49296
No	1.33708
No	3.63036
No	1.77563
No	0.317966
No	0.45128
No	1.24939
No	0.775835
No	1.33664
No	0.905201
No	0.518464
No	0.816091
No	0.304648
No	1.20909
No	2.55748
No	1.66371
No	0.827915
No	1.41274
No	0.636755
No	1.7055
No	0.512147
No	2.7152
No	0.814789
No	0.728202
No	0.825315
No	1.10023
No	1.26866
No	1.06562
No	1.50612
No	1.31078
No	0.598079
No	2.77124
No	2.86612
No	0.768152
No	3.64252
No	0.60867
No	0.464071
No	0.475679
No	0.66015
No	3.5508
No	4.45469
No	2.08798
No	2.34298
No	1.18265
No	0.593757
No	1.85972
No	0.431609
No	0.557701
No	1.9524
No	0.648549
No	0.496893
No	0.854031
No	0.46276
No	0.690831
No	1.09949
No	0.583762
No	1.0239
No	2.05351
No	4.35052
No	1.08213
No	5.42243
No	1.86831
No	0.470511
No	3.07615
No	1.38432
No	4.22494
No	0.603033
No	0.611384
No	3.52339
No	0.700654
No	0.843128
No	0.401403
No	0.34674
No	2.97875
No	1.84883
No	3.40357
No	1.16756
No	0.850698
No	1.411
No	0.549786
No	2.54985
No	1.67193
No	1.20288
No	0.423928
No	0.546824
No	0.579314
No	1.97051
No	2.10908
No	0.662203
No	1.31924
No	1.26637
No	2.09085
No	0.759946
No	0.407972
No	0.503364
No	1.32877
No	1.1026
No	0.416594
No	1.96396
No	0.40058
No	0.421232
No	1.624
No	1.23086
No	6.82574
No	2.08058
No	1.50509
No	1.02125
No	1.81717
No	0.338893
No	2.27054
No	0.663728
No	0.928213
No	1.2464
No	0.976001
No	0.778054
No	0.70242
No	0.33263
No	0.388513
No	0.395835
No	9.13729
No	0.815626
No	0.462403
No	1.44672
No	4.58752
No	1.97996
No	1.14927
No	1.76024
No	1.14413
No	5.50981
No	2.85685
No	1.76496
No	0.615949
No	1.91455
No	0.861895
No	2.40176
No	0.71034
No	1.0561
No	2.20134
No	0.700537
No	2.93792
No	1.6444
No	0.455961
No	0.629357
No	4.5397
No	2.82841
No	1.81664
No	1.601
No	0.568851
No	1.46258
No	2.56362
No	0.322259
No	6.58506
No	1.74217
No	1.8663
No	1.48675
No	3.93571
No	0.384633
No	3.36223
No	3.11414
No	0.60407
No	3.64509
No	1.57494
No	2.26738
No	6.60039
No	1.73236
No	0.652498
No	0.458038
No	0.719263
No	1.1921
No	2.85853
No	2.06083
No	0.372358
No	1.49967
No	0.413092
No	1.13136
No	0.818473
No	0.545579
No	0.464115
No	1.80648
No	0.448101
No	0.82765
No	3.25818
No	3.36236
No	0.937012
No	2.66578
No	1.53044
No	4.79666
No	0.532029
No	0.430981
No	6.03806
No	1.56645
No	5.30026
No	1.28612
No	0.698575
No	1.84501
No	2.22087
No	1.46797
No	0
No	4.07992
No	0.691345
No	9.13729
No	0.465566
No	5.51749
No	0.811379
No	2.50593
No	0.629488
No	5.50168
No	0.408679
No	1.4525
No	0.796184
No	0.30569
No	1.51117
No	0
No	8.74903
No	0.696223
No	0.430011
No	0.595633
No	0.391034
No	1.44419
No	0.657324
No	1.10454
No	3.11722
No	2.81546
No	0.735624
No	1.63328
No	0
No	0.925544
No	0.807435
No	0.588435
No	1.6422
No	0.538377
No	0.770323
No	5.37718
No	1.00402
No	0.482997
No	7.27316
No	5.37507
No	7.99017
No	2.50113
No	1.5006
No	3.69873
No	0.606026
No	0.724068
No	1.17622
No	1.06213
No	0.91275
No	0.464745
No	1.50069
No	2.61904
No	0.78473
No	9.13729
No	0.682889
No	2.44589
No	2.76016
No	0.597513
No	2.89521
No	0.707895
No	1.11925
No	0.610697
No	1.46079
No	9.13729
No	1.17652
No	0.904352
No	1.4877
No	1.49789
No	0.917106
No	0.326534
No	1.96436
No	3.90085
No	5.71956
No	1.02383
No	2.4019
No	2.06313
No	0
No	0.331452
No	0.413512
No	0.661647
No	0.567862
No	0.342046
No	1.28453
No	0.886893
No	0.641587
No	1.87685
No	0.552836
No	1.14932
No	0.685654
No	0.61292
No	0.446389
No	1.24324
No	3.61893
No	0.881332
No	0.522675
No	0.522442
No	0.707946
No	0.555689
No	1.29368
No	0.515818
No	7.15178
No	1.90377
No	0.772945
No	0.764386
No	0.496421
No	1.23766
No	0.480477
No	0.316277
No	0.533521
No	0.547186
No	0.920177
No	0.76583
No	0.530925
No	4.38836
No	0.33767
No	2.89242
No	1.11851
No	0.539924
No	1.03302
No	1.58672
No	3.30865
No	0.43041
No	0.583283
No	0.36285
No	0.458855
No	0.46974
No	0.558635
No	0.454733
No	0.849829
No	0.665383
No	0.515215
No	0.472059
No	3.34999
No	0.648581
No	0.308992
No	2.22315
No	0.448837
No	0.750979
No	0.515385
No	2.66474
No	4.69891
No	1.85922
No	3.60803
No	1.49689
No	0.457666
No	0.578671
No	0.862703
No	0.558516
No	0.544759
No	0.592487
No	0.556633
No	0.574112
No	0.483298
No	0.648295
No	1.8301
No	1.39432
No	0.410787
No	0.413613
No	0.458642
No	1.38979
No	1.08666
No	0.915317
No	0.394136
No	0.505327
No	1.49394
No	0.435459
No	0.853015
No	1.33842
No	0.474624
No	0.482877
No	0.424136
No	0.451056
No	0.481772
No	0.57171
No	1.1678
No	2.18758
No	1.03469
No	2.67482
No	0.559371
No	0.954867
No	0.555082
No	0.825888
No	0.683957
No	5.84887
No	0.573069
No	2.80911
No	0.459248
No	1.38803
No	1.43543
No	0.561722
No	1.02932
No	4.25455
No	0.534533
No	0.963255
No	1.05256
No	3.27951
No	5.37843
No	0.559597
No	2.61317
No	0.571036
No	0.744186
No	0.713614
No	6.29191
No	1.02189
No	4.52444
No	1.23457
No	0
No	3.3136
No	0.446856
No	0.373961
No	0.446293
No	1.26051
No	1.03151
No	1.05404
No	2.32894
No	1.57658
No	0.955564
No	0.455114
No	2.79319
No	0.876187
No	0.521507
No	0.54027
No	1.11431
No	1.26238
No	4.08313
No	0.57539
No	0.688636
No	0.43731
No	0.380982
No	0.473546
No	1.65052
No	1.76201
No	0.494225
No	0.619921
No	1.09199
No	0.787956
No	1.00976
No	0.646908
No	2.28136
No	2.66026
No	0.58159
No	0.85665
No	3.10789
No	1.82484
No	2.33134
No	0.553965
No	0.841524
No	0.443155
No	0.536825
No	1.02064
No	1.92619
No	1.28934
No	0.897265
No	0.401116
No	0.520552
No	0.398952
No	0.87171
No	1.59155
No	0.506961
No	1.28903
No	3.52314
No	0.556658
No	0.621276
No	1.01513
No	0.534533
No	0.432157
No	0.395609
No	0.414359
No	4.23963
No	0.621881
No	0.33732
No	2.07325
No	0.441443
No	0.881442
No	0.478488
No	1.70303
No	1.74299
No	0.905805
No	1.62157
No	0.67894
No	0.707643
No	0.543126
No	0.646003
No	0.292922
No	0.687826
No	0.374706
No	2.1316
No	1.84161
No	1.47497
No	0.613972
No	1.3207
No	0.467263
No	0.484503
No	1.07429
No	0.498652
No	1.09105
No	2.77262
No	2.15622
No	0.608847
No	0.495648
No	0.296582
No	1.77606
No	0.603918
No	1.47537
No	1.06272
No	0.638428
No	0.556252
No	1.47537
No	0.438607
No	0.61771
No	0.775356
No	0.656109
No	1.95548
No	5.37626
No	0.538006
No	0.831505
No	0.606332
No	0.680102
No	0.837425
No	0.370631
No	3.5011
No	3.99139
No	0.502052
No	1.15821
No	0.51046
No	2.21132
No	0.739251
No	0.741195
No	0.522554
No	0.787868
No	0.750897
No	0.648399
No	0.512033
No	1.50587
No	0.379217
No	0.473093
No	0.653819
No	0.458166
No	0.509189
No	0.431767
No	2.43628
No	1.27544
No	0.442648
No	0.778628
No	0.742273
No	0.714582
No	0.899825
No	0.727329
No	0.592805
No	0.393553
No	0.666314
No	0.46651
No	0.447513
No	1.7544
No	2.07468
No	1.55066
No	0.442052
No	0.614354
No	0.540803
No	2.27653
No	1.15106
No	0.944443
No	1.08495
No	0.714381
No	0.509508
No	3.35877
No	0.387893
No	0.492472
No	2.24453
No	0.47921
No	9.13729
No	5.40242
No	0.597484
No	0.31282
No	1.6266
No	0.477134
No	0.576718
No	0.734984
No	0.423224
No	0.528728
No	0.676138
No	2.00702
No	0.589248
No	1.59007
No	0.577787
No	0.635786
No	2.40821
No	1.65924
No	2.69217
No	0.749158
No	6.40173
No	0.716001
No	1.43754
No	1.56548
No	4.74744
No	0.457749
No	0.481821
No	0.605868
No	0.390609
No	0.792017
No	0.363103
No	0.750585
No	0.457745
No	1.16218
No	0.530653
No	0.570436
No	0.694511
No	2.62782
No	0.797792
No	2.92489
No	2.03406
No	2.12856
No	0.852984
No	0.636655
No	1.06773
No	0.318097
No	0.69588
No	0.561771
No	1.08676
No	0.452544
No	0.774202
No	0.449705
No	1.42157
No	1.45113
No	0.898159
No	0.412669
No	0.452163
No	2.66868
No	0.377881
No	0.45782
No	1.92078
No	0.73373
No	1.94451
No	0.282357
No	0.517035
No	2.38451
No	1.91257
No	1.16405
No	0.464444
No	0.877495
No	0.444846
No	0.342372
No	2.39584
No	0.450348
No	2.52012
No	3.70219
No	1.84296
No	0.916023
No	0.750466
No	0.494278
No	0.31193
No	0.584465
No	1.94098
No	0.451841
No	0.407191
No	0.862674
No	0.653915
No	0.468093
No	1.05176
No	1.54037
No	0.81615
No	0.62124
No	1.06635
No	0.741247
No	4.19086
No	0.468583
No	0.827751
No	0.432918
No	0.496834
No	1.84733
No	0.862353
No	0.562619
No	0.478764
No	0.708794
No	3.25104
No	0.876295
No	0.414073
No	0.486693
No	1.17317
No	0.554002
No	1.07665
No	0.535568
No	0.364322
No	0.697792
No	0.420666
No	1.75343
No	1.32237
No	0.469256
No	1.032
No	0.576018
No	1.6767
No	1.08664
No	2.71091
No	1.30351
No	0.46351
No	0.832959
No	3.46727
No	0.476859
No	0.358081
No	0.770673
No	0.701922
No	0.96272
No	0.685017
No	0.369101
No	2.45528
No	0.929785
No	0.611402
No	0.471253
No	1.3788
No	0.942374
No	0.610755
No	0.786542
No	3.44209
No	1.10304
No	0.462431
No	0.655783
No	3.3961
No	0.496713
No	2.18554
No	2.35486
No	0.562348
No	0.747195
No	0.647021
No	0.600067
No	0.812822
No	1.9903
No	0.475252
No	2.08342
No	0.712126
No	1.09266
No	0.908829
No	0.423206
No	0.712066
No	0.836766
No	1.52027
No	0.666454
No	1.10922
No	0
No	1.85162
No	0.565284
No	0.677074
No	1.17667
No	0.487445
No	1.18657
No	0.77239
No	2.52434
No	2.65254
No	0.381768
No	0.62777
No	1.14307
No	3.4456
No	0.576328
No	0.468963
No	1.05455
No	0.51098
No	0.321271
No	1.9663
No	0.401078
No	1.39397
No	0.957236
No	0.443485
No	1.44663
No	2.81684
No	0.679371
No	0.483508
No	3.33951
No	0.745605
No	1.01715
No	0.3464
No	1.43252
No	0.642824
No	0.99317
No	0.442698
No	0.552467
No	0.581363
No	0.782872
No	0.719101
No	1.24275
No	0.815903
No	0.417114
No	0.886824
No	0.374959
No	0.697116
No	0.486035
No	0.382108
No	0.755428
No	0.488074
No	0.731276
No	1.49299
No	2.45892
No	0.631972
No	0.491463
No	0.62035
No	0.404121
No	1.88197
No	0.722666
No	0.634241
No	0.513721
No	1.01009
No	1.18793
No	0.540411
No	0.900469
No	0.429663
No	1.67244
No	0.409544
No	1.25391
No	0.795862
No	0.355024
No	0.473022
No	0.493867
No	0.489198
No	4.13496
No	2.22259
No	0.611037
No	3.38559
No	0.568324
No	1.10923
No	0.496717
No	0.517971
No	0.551811
No	3.53144
No	0.342207
No	3.08774
No	2.76172
No	0.644363
No	0.74314
No	2.3796
No	2.46786
No	0.845699
No	1.30504
No	0.444185
No	1.10837
No	0.545317
No	0.546421
No	0.545259
No	0.681329
No	2.02969
No	0.516724
No	0.569852
No	3.18703
No	1.20821
No	0.738459
No	0.442719
No	1.39331
No	0.543169
No	0.50478
No	0.451484
No	2.11269
No	0.613121
No	0.341216
No	0.396015
No	0.71748
No	0.388826
No	0.321367
No	0.804104
No	1.06144
No	0.406748
No	1.74177
No	1.28371
No	2.37511
No	0.853381
No	3.38403
No	0.532524
No	0.814407
No	1.04909
No	1.64045
No	1.26849
No	0.358143
No	0.429765
No	0.837554
No	0.57121
No	1.8432
No	1.56356
No	0.434819
No	1.59471
No	0.548782
No	0.359476
No	0.615943
No	3.00095
No	0.74397
No	0.822302
No	1.12959
No	2.95055
No	0.443448
No	0.43501
No	0.423768
No	1.8757
No	1.15379
No	1.49462
No	1.07185
No	0.474251
No	0.659513
No	0.487545
No	1.34923
No	0.352766
No	0.480714
No	0.586479
No	1.01972
No	0.50625
No	0.675339
No	0.520799
No	0.588261
No	3.05682
No	3.7341
No	1.24497
No	3.77896
No	1.9053
No	0.577236
No	1.57001
No	0.633898
No	0.606097
No	1.11995
No	1.12888
No	0.525049
No	0.458154
No	0.518682
No	0.972213
No	0.725375
No	1.62711
No	0.469597
No	0.395203
No	0.417235
No	0.587028
No	0.346829
No	0.599917
No	1.07272
No	1.35353
No	0.520583
No	1.07051
No	1.42133
No	2.24079
No	0.651892
No	0.458037
No	0.730325
No	0.817106
No	1.86351
No	0.375914
No	0.609695
No	2.03397
No	0.49409
No	1.15169
No	0.512281
No	0.653312
No	0.345524
No	5.83918
No	1.02369
No	1.21127
No	1.69202
No	2.99613
No	5.50315
No	0.576138
No	0.296624
No	2.25778
No	0.64287
No	0.688806
No	0.728236
No	1.16948
No	0.521696
No	0.442688
No	0.643569
No	2.7878
No	0.601462
No	0.435976
No	0.584383
No	3.25642
No	0.544379
No	0.615657
No	1.76307
No	0.384418
No	0.671226
No	1.55697
No	0.518943
No	1.20884
No	0.963169
No	0.551617
No	1.27068
No	0.386671
No	2.08154
No	0.468005
No	0.383362
No	1.84138
No	0
No	0.417737
No	0.683081
No	0.537169
No	0.406457
No	0.683166
No	0.369988
No	0.553977
No	0.480119
No	3.37214
No	0.613482
No	0.392179
No	0.798904
No	1.609
No	0.675045
No	0.530663
No	1.36666
No	0.460896
No	0.670587
No	0.793148
No	0.410116
No	0.412498
No	0.509652
No	2.17487
No	1.66104
No	0.473615
No	3.79031
No	0.663332
No	1.63345
No	0.558836
No	0.482117
No	0.649622
No	0.576463
No	0.424256
No	0.521924
No	1.09652
No	0.695269
No	0.362718
No	2.722
No	0.779581
No	0.484908
No	0.891392
No	0.744196
No	0.685844
No	0.59455
No	0.867771
No	0.304492
No	0.733137
No	0.787418
No	2.1359
No	0.587581
No	0.498573
No	0.681716
No	1.25058
No	0.561376
No	0.334924
No	0.417916
No	0.8137
No	0.588469
No	1.4771
No	0.587895
No	0.586945
No	0.665555
No	4.18672
No	0.54658
No	1.10037
No	1.05878
No	1.41856
No	1.27412
No	0.619269
No	0.498648
No	0.452788
No	0.481915
No	0.459841
No	1.88304
No	0.524465
No	0.684728
No	0.494565
No	2.20152
No	2.13057
No	3.47095
No	1.73673
No	1.28951
No	1.68529
No	0.802472
No	0.567279
No	0.694833
No	0.768081
No	1.05685
No	0.493138
No	0.491953
No	0.564345
No	3.78495
No	0.478606
No	0.421945
No	0.951782
No	0.524423
No	0.456798
No	1.93955
No	0.649835
No	0.521784
No	0.653837
No	0.70772
No	1.86324
No	0.856403
No	0.295734
No	0.84516
No	0.714653
No	0.463353
No	0.891086
No	0.488965
No	0.635534
No	0.895708
No	0.472393
No	1.24491
No	1.25455
No	0.630043
No	1.12307
No	2.81049
No	1.12965
No	0.975356
No	3.76813
No	0.433261
No	1.6524
No	0.644255
No	1.1146
No	0.510108
No	0.948978
No	1.72943
No	0.555844
No	1.40402
No	2.99155
No	0.396548
No	0.336978
No	0.695288
No	0.518112
No	0.430341
No	0.90409
No	0.560842
No	1.69004
No	0.460636
No	1.94679
No	2.26158
No	0.756559
No	2.23958
No	0.8138
No	0.586322
No	5.5818
No	1.78087
No	0.571898
No	0.669319
No	1.28575
No	0.376506
No	1.22607
No	1.4372
No	0.577315
No	1.35742
No	0.883772
No	1.04725
No	0.478483
No	0.552298
No	0.465318
No	0.557825
No	2.53743
No	2.87544
No	0.413511
No	1.11744
No	0.569972
No	2.10956
No	1.8723
No	6.71634
No	0.506803
No	2.55207
No	0.262135
No	0.540491
No	0.37986
No	1.59233
No	0.454176
No	1.98617
No	1.40456
No	2.31238
No	0.645011
No	4.84785
No	0
No	8.31658
No	0.691105
No	1.17259
No	0.697439
No	4.16187
No	0.575885
No	0.46181
No	0.504276
No	0.538582
No	1.88798
No	0.683607
No	0.571033
No	0.676118
No	1.0164
No	0.554253
No	1.16999
No	0.712273
No	0.370016
No	0.567514
No	0.944926
No	0.872695
No	0.638798
No	2.62391
No	0.507613
No	0.516782
No	1.12096
No	1.69377
No	0.464599
No	1.32998
No	0.522216
No	0.586997
No	2.883
No	9.13729
No	1.94194
No	0.466163
No	0.334478
No	0.788749
No	2.74691
No	0.600882
No	2.01585
No	2.13274
No	0.819073
No	1.45748
No	0.56155
No	2.4309
No	3.26042
No	1.07275
No	0.442783
No	0.411565
No	0.488626
No	0.422284
No	0.475589
No	0.603155
No	2.66798
No	0.954565
No	0.460379
No	0.456002
No	4.49315
No	1.4311
No	1.54087
No	0.499502
No	0.362131
No	0.551695
No	0.330573
No	0.441827
No	0.421322
No	0.442026
No	0.473314
No	1.50919
No	0.504018
No	0.621304
No	0.758106
No	1.14058
No	1.09485
No	1.65967
No	1.54372
No	0.433429
No	5.66518
No	0.849566
No	0.922207
No	0.749843
No	0.580059
No	0.432633
No	1.71726
No	5.91943
No	5.57831
No	0.966833
No	0.493715
No	0.899294
No	0.637815
No	0.701478
No	2.65371
No	0.699471
No	0.698732
No	0.689856
No	3.09788
No	0.722058
No	2.32731
No	0.903703
No	0.550276
No	0.305059
No	0.527848
No	2.09467
No	1.56765
No	4.27291
No	0.482907
No	1.43752
No	0.372068
No	0.576797
No	1.58049
No	0.386436
No	0.482535
No	1.18133
No	0.898045
No	0.809962
No	1.19246
No	0.906949
No	0.399584
No	2.20816
No	0.709772
No	0.595211
No	1.14188
No	0.987469
No	0.543495
No	1.52789
No	0.677954
No	1.03384
No	0.489477
No	7.57888
No	0.449277
No	0.924811
No	0.486963
No	0.555771
No	1.61586
[truncated: 11,299 more rows]

## Sheet: FigS33B
Gene_bin	Gene_class	CDS_TE_CV
bin1	Shorter_uORF	1.25265
bin1	Shorter_uORF	1.05176
bin1	Shorter_uORF	1.52201
bin1	Shorter_uORF	1.95739
bin1	Shorter_uORF	1.11016
bin1	Shorter_uORF	1.2488
bin1	Shorter_uORF	1.33578
bin1	Shorter_uORF	0.970198
bin1	Shorter_uORF	1.42067
bin1	Shorter_uORF	1.49074
bin1	Shorter_uORF	1.24695
bin1	Shorter_uORF	2.42667
bin1	Shorter_uORF	1.66041
bin1	Shorter_uORF	1.85394
bin1	Shorter_uORF	2.71219
bin1	Shorter_uORF	2.65675
bin1	Shorter_uORF	1.95838
bin1	Shorter_uORF	1.59907
bin1	Shorter_uORF	2.55402
bin1	Shorter_uORF	1.82701
bin1	Shorter_uORF	1.07539
bin1	Shorter_uORF	2.71138
bin1	Shorter_uORF	0.889157
bin1	Shorter_uORF	1.90735
bin1	Shorter_uORF	2.55688
bin1	Shorter_uORF	1.25379
bin1	Shorter_uORF	1.97751
bin1	Shorter_uORF	1.39844
bin1	Shorter_uORF	1.52702
bin1	Shorter_uORF	1.26586
bin1	Shorter_uORF	1.57839
bin1	Shorter_uORF	1.08585
bin1	Shorter_uORF	4.99504
bin1	Shorter_uORF	2.18254
bin1	Shorter_uORF	2.71645
bin1	Shorter_uORF	1.2159
bin1	Shorter_uORF	2.52918
bin1	Shorter_uORF	5.0271
bin1	Shorter_uORF	1.09483
bin1	Shorter_uORF	1.09079
bin1	Shorter_uORF	0.755576
bin1	Shorter_uORF	0.979114
bin1	Shorter_uORF	1.73391
bin1	Shorter_uORF	1.41672
bin1	Shorter_uORF	2.69109
bin1	Shorter_uORF	2.53907
bin1	Shorter_uORF	1.19541
bin1	Shorter_uORF	0.800894
bin1	Shorter_uORF	1.7743
bin1	Shorter_uORF	0.850061
bin1	Shorter_uORF	1.91861
bin1	Shorter_uORF	0.698979
bin1	Shorter_uORF	2.1511
bin1	Shorter_uORF	2.29851
bin1	Shorter_uORF	1.15921
bin1	Shorter_uORF	1.14877
bin1	Shorter_uORF	1.89358
bin1	Shorter_uORF	1.80469
bin1	Shorter_uORF	3.81343
bin1	Shorter_uORF	1.73248
bin1	Shorter_uORF	4.20659
bin1	Shorter_uORF	3.76389
bin1	Shorter_uORF	1.09482
bin1	Shorter_uORF	1.69957
bin1	Shorter_uORF	0.991254
bin1	Shorter_uORF	1.08822
bin1	Shorter_uORF	1.08737
bin1	Shorter_uORF	1.18064
bin1	Shorter_uORF	8.09559
bin1	Shorter_uORF	1.08211
bin1	Shorter_uORF	2.15271
bin1	Shorter_uORF	3.61696
bin1	Shorter_uORF	1.06018
bin1	Shorter_uORF	2.03829
bin1	Shorter_uORF	1.29489
bin1	Shorter_uORF	1.11626
bin1	Shorter_uORF	1.37785
bin1	Shorter_uORF	2.33682
bin1	Shorter_uORF	1.92118
bin1	Shorter_uORF	1.8147
bin1	Shorter_uORF	1.22468
bin1	Shorter_uORF	1.16879
bin1	Shorter_uORF	1.07534
bin1	Shorter_uORF	1.2704
bin1	Shorter_uORF	0.799234
bin1	Shorter_uORF	1.25743
bin1	Shorter_uORF	1.24058
bin1	Shorter_uORF	1.15713
bin1	Shorter_uORF	1.1382
bin1	Shorter_uORF	0.925108
bin1	Shorter_uORF	2.20191
bin1	Shorter_uORF	1.34711
bin1	Shorter_uORF	1.0495
bin1	Shorter_uORF	1.74738
bin1	Shorter_uORF	3.7751
bin1	Shorter_uORF	1.93299
bin1	Shorter_uORF	3.76343
bin1	Shorter_uORF	1.95647
bin1	Shorter_uORF	2.71607
bin1	Shorter_uORF	1.56708
bin1	Shorter_uORF	1.5191
bin1	Shorter_uORF	1.70839
bin1	Shorter_uORF	1.16429
bin1	Shorter_uORF	0.919993
bin1	Shorter_uORF	1.56334
bin1	Shorter_uORF	1.57648
bin1	Shorter_uORF	1.11077
bin1	Shorter_uORF	1.17365
bin1	Shorter_uORF	1.14209
bin1	Shorter_uORF	1.77421
bin1	Shorter_uORF	2.65731
bin1	Shorter_uORF	3.92022
bin1	Shorter_uORF	1.33395
bin1	Shorter_uORF	1.09097
bin1	Shorter_uORF	1.5194
bin1	Shorter_uORF	1.93289
bin1	Shorter_uORF	1.05192
bin1	Shorter_uORF	1.24764
bin1	Shorter_uORF	1.54376
bin1	Shorter_uORF	3.49915
bin1	Shorter_uORF	2.04264
bin1	Shorter_uORF	2.03123
bin1	Shorter_uORF	3.05465
bin1	Shorter_uORF	0.938063
bin1	Shorter_uORF	1.35038
bin1	Shorter_uORF	1.23794
bin1	Shorter_uORF	1.57117
bin1	Shorter_uORF	1.0814
bin1	Shorter_uORF	0.898965
bin1	Longer_uORF	1.2921
bin1	Longer_uORF	1.47593
bin1	Longer_uORF	1.60282
bin1	Longer_uORF	1.75119
bin1	Longer_uORF	1.72223
bin1	Longer_uORF	6.00614
bin1	Longer_uORF	0.706294
bin1	Longer_uORF	1.97925
bin1	Longer_uORF	1.46169
bin1	Longer_uORF	2.77019
bin1	Longer_uORF	3.35588
bin1	Longer_uORF	1.37226
bin1	Longer_uORF	1.24269
bin1	Longer_uORF	2.5971
bin1	Longer_uORF	1.0426
bin1	Longer_uORF	1.17637
bin1	Longer_uORF	1.71575
bin1	Longer_uORF	1.36134
bin1	Longer_uORF	1.02826
bin1	Longer_uORF	2.33597
bin1	Longer_uORF	4.16201
bin1	Longer_uORF	2.40956
bin1	Longer_uORF	1.63898
bin1	Longer_uORF	0.610417
bin1	Longer_uORF	1.09976
bin1	Longer_uORF	1.25992
bin1	Longer_uORF	5.80966
bin1	Longer_uORF	1.52554
bin1	Longer_uORF	0.779305
bin1	Longer_uORF	1.43094
bin1	Longer_uORF	1.11795
bin1	Longer_uORF	1.11729
bin1	Longer_uORF	1.19374
bin1	Longer_uORF	1.38141
bin1	Longer_uORF	1.68585
bin1	Longer_uORF	2.27058
bin1	Longer_uORF	2.88929
bin1	Longer_uORF	1.60714
bin1	Longer_uORF	2.14081
bin1	Longer_uORF	1.29224
bin1	Longer_uORF	1.71578
bin1	Longer_uORF	2.17094
bin1	Longer_uORF	1.29457
bin1	Longer_uORF	1.87448
bin1	Longer_uORF	1.45491
bin1	Longer_uORF	1.61795
bin1	Longer_uORF	1.29329
bin1	Longer_uORF	1.20005
bin1	Longer_uORF	2.31557
bin1	Longer_uORF	1.91188
bin1	Longer_uORF	2.39352
bin1	Longer_uORF	0.800787
bin1	Longer_uORF	2.11701
bin1	Longer_uORF	1.78836
bin1	Longer_uORF	1.12066
bin1	Longer_uORF	1.91456
bin1	Longer_uORF	1.13636
bin1	Longer_uORF	4.78251
bin1	Longer_uORF	0.804365
bin1	Longer_uORF	0.765576
bin1	Longer_uORF	1.75895
bin1	Longer_uORF	1.17241
bin1	Longer_uORF	1.65833
bin1	Longer_uORF	1.62968
bin1	Longer_uORF	2.23411
bin1	Longer_uORF	1.34417
bin1	Longer_uORF	1.19708
bin1	Longer_uORF	3.49991
bin1	Longer_uORF	2.49589
bin1	Longer_uORF	3.90817
bin1	Longer_uORF	3.48924
bin1	Longer_uORF	0.875262
bin1	Longer_uORF	1.02768
bin1	Longer_uORF	1.08188
bin1	Longer_uORF	1.64747
bin1	Longer_uORF	1.16879
bin1	Longer_uORF	1.18254
bin1	Longer_uORF	1.74288
bin1	Longer_uORF	1.46707
bin1	Longer_uORF	1.85593
bin1	Longer_uORF	1.54805
bin1	Longer_uORF	1.36743
bin1	Longer_uORF	2.78957
bin1	Longer_uORF	1.65601
bin1	Longer_uORF	1.32461
bin1	Longer_uORF	1.52111
bin1	Longer_uORF	1.80198
bin1	Longer_uORF	0.750026
bin1	Longer_uORF	1.70711
bin1	Longer_uORF	1.44114
bin1	Longer_uORF	1.20631
bin1	Longer_uORF	1.48793
bin1	Longer_uORF	1.26556
bin1	Longer_uORF	1.45024
bin1	Longer_uORF	0.855454
bin1	Longer_uORF	2.42218
bin1	Longer_uORF	1.57009
bin1	Longer_uORF	1.279
bin1	Longer_uORF	1.6805
bin1	Longer_uORF	1.47937
bin1	Longer_uORF	1.41166
bin1	Longer_uORF	1.03129
bin1	Longer_uORF	1.69913
bin1	Longer_uORF	2.6035
bin1	Longer_uORF	1.82246
bin1	Longer_uORF	1.38824
bin1	Longer_uORF	0.816846
bin1	Longer_uORF	0.852757
bin1	Longer_uORF	1.22297
bin1	Longer_uORF	1.22333
bin1	Longer_uORF	0.972725
bin1	Longer_uORF	1.66784
bin1	Longer_uORF	0.95333
bin1	Longer_uORF	1.48776
bin1	Longer_uORF	0.998012
bin1	Longer_uORF	2.3163
bin1	Longer_uORF	0.762136
bin1	Longer_uORF	1.6287
bin1	Longer_uORF	1.19788
bin1	Longer_uORF	1.09282
bin1	Longer_uORF	1.09705
bin1	Longer_uORF	1.29041
bin1	Longer_uORF	1.39684
bin1	Longer_uORF	1.87388
bin1	Longer_uORF	1.45912
bin1	Longer_uORF	7.13198
bin2	Shorter_uORF	0.738584
bin2	Shorter_uORF	0.939586
bin2	Shorter_uORF	2.25398
bin2	Shorter_uORF	1.22228
bin2	Shorter_uORF	1.26643
bin2	Shorter_uORF	1.47264
bin2	Shorter_uORF	1.51466
bin2	Shorter_uORF	1.0447
bin2	Shorter_uORF	2.48221
bin2	Shorter_uORF	1.14746
bin2	Shorter_uORF	1.18247
bin2	Shorter_uORF	1.12537
bin2	Shorter_uORF	1.60802
bin2	Shorter_uORF	1.55479
bin2	Shorter_uORF	2.61096
bin2	Shorter_uORF	1.36784
bin2	Shorter_uORF	1.36417
bin2	Shorter_uORF	0.94814
bin2	Shorter_uORF	3.22113
bin2	Shorter_uORF	0.892552
bin2	Shorter_uORF	1.35771
bin2	Shorter_uORF	2.73326
bin2	Shorter_uORF	1.25315
bin2	Shorter_uORF	1.37724
bin2	Shorter_uORF	1.35858
bin2	Shorter_uORF	0.758734
bin2	Shorter_uORF	1.38819
bin2	Shorter_uORF	2.15518
bin2	Shorter_uORF	0.996689
bin2	Shorter_uORF	3.00228
bin2	Shorter_uORF	0.632784
bin2	Shorter_uORF	1.10488
bin2	Shorter_uORF	1.33859
bin2	Shorter_uORF	1.29218
bin2	Shorter_uORF	2.21328
bin2	Shorter_uORF	1.21242
bin2	Shorter_uORF	1.05649
bin2	Shorter_uORF	2.71903
bin2	Shorter_uORF	1.67116
bin2	Shorter_uORF	1.04802
bin2	Shorter_uORF	1.43675
bin2	Shorter_uORF	0.709055
bin2	Shorter_uORF	1.47309
bin2	Shorter_uORF	1.124
bin2	Shorter_uORF	1.42633
bin2	Shorter_uORF	1.88616
bin2	Shorter_uORF	1.73861
bin2	Shorter_uORF	1.98728
bin2	Shorter_uORF	1.58834
bin2	Shorter_uORF	5.33904
bin2	Shorter_uORF	0.778621
bin2	Shorter_uORF	1.4837
bin2	Shorter_uORF	1.51663
bin2	Shorter_uORF	1.31132
bin2	Shorter_uORF	0.944426
bin2	Shorter_uORF	1.62937
bin2	Shorter_uORF	1.07712
bin2	Shorter_uORF	2.43106
bin2	Shorter_uORF	1.32481
bin2	Shorter_uORF	1.65431
bin2	Shorter_uORF	1.29488
bin2	Shorter_uORF	1.24468
bin2	Shorter_uORF	1.46428
bin2	Shorter_uORF	1.35676
bin2	Shorter_uORF	1.95032
bin2	Shorter_uORF	1.16328
bin2	Shorter_uORF	2.10985
bin2	Shorter_uORF	1.29267
bin2	Shorter_uORF	1.27932
bin2	Shorter_uORF	1.07314
bin2	Shorter_uORF	1.50269
bin2	Shorter_uORF	1.58898
bin2	Shorter_uORF	0.959789
bin2	Shorter_uORF	2.67862
bin2	Shorter_uORF	0.955233
bin2	Shorter_uORF	2.51123
bin2	Shorter_uORF	1.09508
bin2	Shorter_uORF	1.11932
bin2	Shorter_uORF	1.69855
bin2	Shorter_uORF	1.62346
bin2	Shorter_uORF	2.20386
bin2	Shorter_uORF	1.76944
bin2	Shorter_uORF	1.77202
bin2	Shorter_uORF	1.25703
bin2	Shorter_uORF	2.56146
bin2	Shorter_uORF	1.34078
bin2	Shorter_uORF	1.44573
bin2	Shorter_uORF	1.98822
bin2	Shorter_uORF	2.58987
bin2	Shorter_uORF	1.67925
bin2	Shorter_uORF	1.19783
bin2	Shorter_uORF	1.97602
bin2	Shorter_uORF	3.20318
bin2	Shorter_uORF	0.918695
bin2	Shorter_uORF	1.66792
bin2	Shorter_uORF	1.0596
bin2	Shorter_uORF	3.50238
bin2	Shorter_uORF	1.79146
bin2	Shorter_uORF	2.12792
bin2	Shorter_uORF	3.03137
bin2	Shorter_uORF	1.1609
bin2	Shorter_uORF	2.05649
bin2	Shorter_uORF	0.880908
bin2	Shorter_uORF	1.25691
bin2	Shorter_uORF	1.12182
bin2	Shorter_uORF	1.2837
bin2	Shorter_uORF	1.14155
bin2	Shorter_uORF	1.23349
bin2	Shorter_uORF	2.47142
bin2	Shorter_uORF	1.13674
bin2	Shorter_uORF	5.81971
bin2	Shorter_uORF	0.887612
bin2	Shorter_uORF	1.20996
bin2	Shorter_uORF	1.44489
bin2	Shorter_uORF	1.26473
bin2	Shorter_uORF	0.994531
bin2	Shorter_uORF	1.66098
bin2	Shorter_uORF	1.23065
bin2	Shorter_uORF	1.29089
bin2	Shorter_uORF	1.75122
bin2	Shorter_uORF	0.895355
bin2	Shorter_uORF	3.14947
bin2	Shorter_uORF	1.21084
bin2	Shorter_uORF	1.06915
bin2	Shorter_uORF	1.77417
bin2	Shorter_uORF	1.77417
bin2	Shorter_uORF	1.10948
bin2	Shorter_uORF	1.96669
bin2	Shorter_uORF	3.94371
bin2	Shorter_uORF	1.74507
bin2	Longer_uORF	1.12241
bin2	Longer_uORF	1.47731
bin2	Longer_uORF	1.65211
bin2	Longer_uORF	1.09542
bin2	Longer_uORF	1.49143
bin2	Longer_uORF	1.06744
bin2	Longer_uORF	1.78918
bin2	Longer_uORF	1.93605
bin2	Longer_uORF	2.55569
bin2	Longer_uORF	1.60486
bin2	Longer_uORF	1.17756
bin2	Longer_uORF	1.74258
bin2	Longer_uORF	0.846646
bin2	Longer_uORF	1.03079
bin2	Longer_uORF	1.27694
bin2	Longer_uORF	3.6985
bin2	Longer_uORF	1.55976
bin2	Longer_uORF	1.49377
bin2	Longer_uORF	0.808123
bin2	Longer_uORF	2.18614
bin2	Longer_uORF	1.64597
bin2	Longer_uORF	1.37677
bin2	Longer_uORF	1.22523
bin2	Longer_uORF	0.567252
bin2	Longer_uORF	4.10163
bin2	Longer_uORF	1.21055
bin2	Longer_uORF	1.25028
bin2	Longer_uORF	0.81866
bin2	Longer_uORF	1.38979
bin2	Longer_uORF	1.0514
bin2	Longer_uORF	1.74432
bin2	Longer_uORF	1.24044
bin2	Longer_uORF	1.44765
bin2	Longer_uORF	1.11402
bin2	Longer_uORF	2.35011
bin2	Longer_uORF	1.38196
bin2	Longer_uORF	1.97232
bin2	Longer_uORF	2.11631
bin2	Longer_uORF	2.99679
bin2	Longer_uORF	1.13278
bin2	Longer_uORF	1.45317
bin2	Longer_uORF	1.05215
bin2	Longer_uORF	0.94819
bin2	Longer_uORF	1.47603
bin2	Longer_uORF	1.46733
bin2	Longer_uORF	2.66717
bin2	Longer_uORF	1.78418
bin2	Longer_uORF	1.31259
bin2	Longer_uORF	1.13359
bin2	Longer_uORF	1.60425
bin2	Longer_uORF	3.89688
bin2	Longer_uORF	0.691587
bin2	Longer_uORF	2.93755
bin2	Longer_uORF	0.975662
bin2	Longer_uORF	1.04341
bin2	Longer_uORF	2.07489
bin2	Longer_uORF	2.72485
bin2	Longer_uORF	1.43748
bin2	Longer_uORF	1.87461
bin2	Longer_uORF	0.850782
bin2	Longer_uORF	0.942181
bin2	Longer_uORF	0.911615
bin2	Longer_uORF	2.59435
bin2	Longer_uORF	1.58696
bin2	Longer_uORF	1.25891
bin2	Longer_uORF	1.12854
bin2	Longer_uORF	1.39777
bin2	Longer_uORF	1.22517
bin2	Longer_uORF	1.00699
bin2	Longer_uORF	1.98465
bin2	Longer_uORF	1.1636
bin2	Longer_uORF	1.08908
bin2	Longer_uORF	1.27086
bin2	Longer_uORF	1.16557
bin2	Longer_uORF	0.875924
bin2	Longer_uORF	0.906692
bin2	Longer_uORF	1.85062
bin2	Longer_uORF	1.81104
bin2	Longer_uORF	0.79712
bin2	Longer_uORF	0.864436
bin2	Longer_uORF	2.30876
bin2	Longer_uORF	1.5712
bin2	Longer_uORF	0.871613
bin2	Longer_uORF	0.884047
bin2	Longer_uORF	1.38019
bin2	Longer_uORF	3.83002
bin2	Longer_uORF	0.818325
bin2	Longer_uORF	0.588207
bin2	Longer_uORF	1.68601
bin2	Longer_uORF	1.08242
bin2	Longer_uORF	1.08172
bin2	Longer_uORF	1.93088
bin2	Longer_uORF	1.61948
bin2	Longer_uORF	1.23245
bin2	Longer_uORF	1.10574
bin2	Longer_uORF	1.20435
bin2	Longer_uORF	1.06059
bin2	Longer_uORF	2.72792
bin2	Longer_uORF	2.46146
bin2	Longer_uORF	1.0132
bin2	Longer_uORF	1.50026
bin2	Longer_uORF	1.07762
bin2	Longer_uORF	1.09265
bin2	Longer_uORF	1.22374
bin2	Longer_uORF	1.76026
bin2	Longer_uORF	0.71339
bin2	Longer_uORF	1.21125
bin2	Longer_uORF	0.787752
bin2	Longer_uORF	0.836265
bin2	Longer_uORF	0.891286
bin2	Longer_uORF	1.09899
bin2	Longer_uORF	1.33189
bin2	Longer_uORF	1.45745
bin2	Longer_uORF	1.18716
bin2	Longer_uORF	1.72842
bin2	Longer_uORF	1.87233
bin2	Longer_uORF	1.59338
bin2	Longer_uORF	1.84385
bin2	Longer_uORF	0.752284
bin2	Longer_uORF	1.01748
bin2	Longer_uORF	1.17267
bin2	Longer_uORF	1.3004
bin2	Longer_uORF	1.63317
bin2	Longer_uORF	1.04309
bin2	Longer_uORF	1.1648
bin2	Longer_uORF	0.651041
bin3	Shorter_uORF	0.719903
bin3	Shorter_uORF	0.850154
bin3	Shorter_uORF	2.05622
bin3	Shorter_uORF	1.06066
bin3	Shorter_uORF	1.41507
bin3	Shorter_uORF	0.8891
bin3	Shorter_uORF	1.57018
bin3	Shorter_uORF	1.41706
bin3	Shorter_uORF	1.29695
bin3	Shorter_uORF	0.725816
bin3	Shorter_uORF	1.10505
bin3	Shorter_uORF	1.56686
bin3	Shorter_uORF	1.24269
bin3	Shorter_uORF	1.3866
bin3	Shorter_uORF	1.47971
bin3	Shorter_uORF	2.42969
bin3	Shorter_uORF	1.0849
bin3	Shorter_uORF	1.38404
bin3	Shorter_uORF	0.799332
bin3	Shorter_uORF	1.48522
bin3	Shorter_uORF	0.935431
bin3	Shorter_uORF	1.28093
bin3	Shorter_uORF	1.53825
bin3	Shorter_uORF	2.59992
bin3	Shorter_uORF	2.1952
bin3	Shorter_uORF	1.31124
bin3	Shorter_uORF	1.329
bin3	Shorter_uORF	1.43558
bin3	Shorter_uORF	2.27028
bin3	Shorter_uORF	0.695603
bin3	Shorter_uORF	0.983152
bin3	Shorter_uORF	2.59427
bin3	Shorter_uORF	1.67975
bin3	Shorter_uORF	0.969565
bin3	Shorter_uORF	1.9786
bin3	Shorter_uORF	1.43296
bin3	Shorter_uORF	2.21615
bin3	Shorter_uORF	2.61327
bin3	Shorter_uORF	4.74892
bin3	Shorter_uORF	0.685343
bin3	Shorter_uORF	0.982091
bin3	Shorter_uORF	4.37283
bin3	Shorter_uORF	1.78706
bin3	Shorter_uORF	2.5062
bin3	Shorter_uORF	1.33022
bin3	Shorter_uORF	1.45817
bin3	Shorter_uORF	0.939821
bin3	Shorter_uORF	1.3112
bin3	Shorter_uORF	2.22353
bin3	Shorter_uORF	1.75871
bin3	Shorter_uORF	0.692205
bin3	Shorter_uORF	1.30212
bin3	Shorter_uORF	4.38111
bin3	Shorter_uORF	1.77543
bin3	Shorter_uORF	0.892825
bin3	Shorter_uORF	1.48357
bin3	Shorter_uORF	2.20152
bin3	Shorter_uORF	1.0923
bin3	Shorter_uORF	1.72739
bin3	Shorter_uORF	0.784543
bin3	Shorter_uORF	1.58942
bin3	Shorter_uORF	4.20294
bin3	Shorter_uORF	0.903004
bin3	Shorter_uORF	0.687199
bin3	Shorter_uORF	1.28215
bin3	Shorter_uORF	1.41026
bin3	Shorter_uORF	1.54293
bin3	Shorter_uORF	1.31353
bin3	Shorter_uORF	2.11703
bin3	Shorter_uORF	1.50058
bin3	Shorter_uORF	1.93155
bin3	Shorter_uORF	1.38534
bin3	Shorter_uORF	0.994076
bin3	Shorter_uORF	1.07828
bin3	Shorter_uORF	1.61854
bin3	Shorter_uORF	1.95199
bin3	Shorter_uORF	3.89363
bin3	Shorter_uORF	1.51895
bin3	Shorter_uORF	0.694396
bin3	Shorter_uORF	2.61718
bin3	Shorter_uORF	1.18579
bin3	Shorter_uORF	1.67925
bin3	Shorter_uORF	1.09419
bin3	Shorter_uORF	0.951649
bin3	Shorter_uORF	1.58167
bin3	Shorter_uORF	2.22361
bin3	Shorter_uORF	1.35997
bin3	Shorter_uORF	2.20987
bin3	Shorter_uORF	3.29955
bin3	Shorter_uORF	0.82266
bin3	Shorter_uORF	1.01893
bin3	Shorter_uORF	0.94389
bin3	Shorter_uORF	1.33063
bin3	Shorter_uORF	1.78238
bin3	Shorter_uORF	0.717928
bin3	Shorter_uORF	1.97216
bin3	Shorter_uORF	1.15009
bin3	Shorter_uORF	2.40479
bin3	Shorter_uORF	1.2244
bin3	Shorter_uORF	1.31381
bin3	Shorter_uORF	1.55045
bin3	Shorter_uORF	1.53371
bin3	Shorter_uORF	1.17221
bin3	Shorter_uORF	1.88454
bin3	Shorter_uORF	1.02694
bin3	Shorter_uORF	1.4809
bin3	Shorter_uORF	1.29101
bin3	Shorter_uORF	1.26405
bin3	Shorter_uORF	1.16758
bin3	Shorter_uORF	1.76503
bin3	Shorter_uORF	1.60271
bin3	Shorter_uORF	1.96397
bin3	Shorter_uORF	1.73312
bin3	Shorter_uORF	2.48356
bin3	Shorter_uORF	1.5775
bin3	Shorter_uORF	1.03791
bin3	Shorter_uORF	1.22983
bin3	Shorter_uORF	1.36847
bin3	Shorter_uORF	1.14483
bin3	Shorter_uORF	0.774082
bin3	Shorter_uORF	1.76139
bin3	Shorter_uORF	1.2972
bin3	Shorter_uORF	1.0218
bin3	Shorter_uORF	1.31973
bin3	Shorter_uORF	0.631828
bin3	Shorter_uORF	1.32677
bin3	Shorter_uORF	4.45117
bin3	Shorter_uORF	0.805752
bin3	Shorter_uORF	1.5732
bin3	Shorter_uORF	1.02123
bin3	Longer_uORF	2.26869
bin3	Longer_uORF	1.16972
bin3	Longer_uORF	1.90824
bin3	Longer_uORF	1.41078
bin3	Longer_uORF	1.06854
bin3	Longer_uORF	1.13918
bin3	Longer_uORF	1.50395
bin3	Longer_uORF	0.774648
bin3	Longer_uORF	0.774661
bin3	Longer_uORF	0.590275
bin3	Longer_uORF	1.25617
bin3	Longer_uORF	1.46242
bin3	Longer_uORF	1.23102
bin3	Longer_uORF	1.35527
bin3	Longer_uORF	1.32139
bin3	Longer_uORF	0.832732
bin3	Longer_uORF	1.12496
bin3	Longer_uORF	2.78407
bin3	Longer_uORF	0.780059
bin3	Longer_uORF	1.8885
bin3	Longer_uORF	0.898254
bin3	Longer_uORF	1.51606
bin3	Longer_uORF	1.49998
bin3	Longer_uORF	1.03882
bin3	Longer_uORF	1.46333
bin3	Longer_uORF	0.893366
bin3	Longer_uORF	2.87308
bin3	Longer_uORF	0.506321
bin3	Longer_uORF	2.16452
bin3	Longer_uORF	1.43726
bin3	Longer_uORF	1.03272
bin3	Longer_uORF	1.23995
bin3	Longer_uORF	1.5089
bin3	Longer_uORF	1.38137
bin3	Longer_uORF	1.36443
bin3	Longer_uORF	1.58034
bin3	Longer_uORF	1.02518
bin3	Longer_uORF	1.13777
bin3	Longer_uORF	1.68153
bin3	Longer_uORF	0.770992
bin3	Longer_uORF	2.09474
bin3	Longer_uORF	1.41658
bin3	Longer_uORF	1.86952
bin3	Longer_uORF	2.78835
bin3	Longer_uORF	2.00182
bin3	Longer_uORF	1.63474
bin3	Longer_uORF	1.59795
bin3	Longer_uORF	1.41105
bin3	Longer_uORF	1.09929
bin3	Longer_uORF	1.48711
bin3	Longer_uORF	0.486514
bin3	Longer_uORF	3.18598
bin3	Longer_uORF	1.31433
bin3	Longer_uORF	1.28353
bin3	Longer_uORF	8.30662
bin3	Longer_uORF	1.57497
bin3	Longer_uORF	2.47934
bin3	Longer_uORF	0.910131
bin3	Longer_uORF	0.579499
bin3	Longer_uORF	1.71713
bin3	Longer_uORF	1.64031
bin3	Longer_uORF	0.892881
bin3	Longer_uORF	1.04378
bin3	Longer_uORF	0.550958
bin3	Longer_uORF	1.03894
bin3	Longer_uORF	1.68553
bin3	Longer_uORF	0.950405
bin3	Longer_uORF	2.11358
bin3	Longer_uORF	0.529284
bin3	Longer_uORF	0.564948
bin3	Longer_uORF	2.15515
bin3	Longer_uORF	0.975792
bin3	Longer_uORF	1.055
bin3	Longer_uORF	1.13547
bin3	Longer_uORF	1.92697
bin3	Longer_uORF	3.10535
bin3	Longer_uORF	0.857377
bin3	Longer_uORF	1.24649
bin3	Longer_uORF	1.35407
bin3	Longer_uORF	1.62514
bin3	Longer_uORF	1.10591
bin3	Longer_uORF	2.51083
bin3	Longer_uORF	1.35313
bin3	Longer_uORF	1.50686
bin3	Longer_uORF	0.907528
bin3	Longer_uORF	1.41577
bin3	Longer_uORF	0.879525
bin3	Longer_uORF	0.505673
bin3	Longer_uORF	1.13671
bin3	Longer_uORF	1.04464
bin3	Longer_uORF	0.975404
bin3	Longer_uORF	1.52765
bin3	Longer_uORF	1.45754
bin3	Longer_uORF	1.02529
bin3	Longer_uORF	1.65447
bin3	Longer_uORF	0.822219
bin3	Longer_uORF	1.49149
bin3	Longer_uORF	0.887521
bin3	Longer_uORF	1.26155
bin3	Longer_uORF	1.17538
bin3	Longer_uORF	2.00557
bin3	Longer_uORF	1.25392
bin3	Longer_uORF	1.31947
bin3	Longer_uORF	1.00213
bin3	Longer_uORF	1.08181
bin3	Longer_uORF	1.3184
bin3	Longer_uORF	1.43354
bin3	Longer_uORF	2.72206
bin3	Longer_uORF	1.30221
bin3	Longer_uORF	1.39012
bin3	Longer_uORF	0.548761
bin3	Longer_uORF	1.30746
bin3	Longer_uORF	0.616237
bin3	Longer_uORF	0.956764
bin3	Longer_uORF	1.22251
bin3	Longer_uORF	0.697146
bin3	Longer_uORF	1.06052
bin3	Longer_uORF	0.729133
bin3	Longer_uORF	0.655964
bin3	Longer_uORF	1.60034
bin3	Longer_uORF	1.07056
bin3	Longer_uORF	1.825
bin3	Longer_uORF	0.452237
bin3	Longer_uORF	0.949824
bin3	Longer_uORF	1.32513
bin3	Longer_uORF	0.70676
bin4	Shorter_uORF	0.78513
bin4	Shorter_uORF	0.930174
bin4	Shorter_uORF	1.01956
bin4	Shorter_uORF	0.981834
bin4	Shorter_uORF	1.18996
bin4	Shorter_uORF	0.775451
bin4	Shorter_uORF	0.642851
bin4	Shorter_uORF	1.17791
bin4	Shorter_uORF	1.58917
bin4	Shorter_uORF	4.10753
bin4	Shorter_uORF	1.77137
bin4	Shorter_uORF	1.12755
bin4	Shorter_uORF	3.25533
bin4	Shorter_uORF	1.96174
bin4	Shorter_uORF	1.55406
bin4	Shorter_uORF	3.17185
bin4	Shorter_uORF	0.969821
bin4	Shorter_uORF	2.26597
bin4	Shorter_uORF	1.68916
bin4	Shorter_uORF	0.75872
bin4	Shorter_uORF	1.57191
bin4	Shorter_uORF	1.11262
bin4	Shorter_uORF	1.09816
bin4	Shorter_uORF	1.29218
bin4	Shorter_uORF	1.24761
bin4	Shorter_uORF	2.35284
bin4	Shorter_uORF	1.3917
bin4	Shorter_uORF	1.03329
bin4	Shorter_uORF	1.16195
bin4	Shorter_uORF	0.582104
bin4	Shorter_uORF	0.945204
bin4	Shorter_uORF	1.60485
bin4	Shorter_uORF	3.23977
bin4	Shorter_uORF	1.90156
bin4	Shorter_uORF	2.55261
bin4	Shorter_uORF	1.26788
bin4	Shorter_uORF	1.53379
bin4	Shorter_uORF	1.00525
bin4	Shorter_uORF	1.13611
bin4	Shorter_uORF	0.672783
bin4	Shorter_uORF	1.45437
bin4	Shorter_uORF	0.764937
bin4	Shorter_uORF	1.1853
bin4	Shorter_uORF	0.87676
bin4	Shorter_uORF	1.00941
bin4	Shorter_uORF	1.5045
bin4	Shorter_uORF	0.593172
bin4	Shorter_uORF	1.66634
bin4	Shorter_uORF	1.1373
bin4	Shorter_uORF	0.972515
bin4	Shorter_uORF	1.62061
bin4	Shorter_uORF	1.51927
bin4	Shorter_uORF	0.790449
bin4	Shorter_uORF	0.801283
bin4	Shorter_uORF	0.710802
bin4	Shorter_uORF	0.624647
bin4	Shorter_uORF	0.561692
bin4	Shorter_uORF	0.56536
bin4	Shorter_uORF	1.28761
bin4	Shorter_uORF	1.72928
bin4	Shorter_uORF	0.634296
bin4	Shorter_uORF	1.59466
bin4	Shorter_uORF	1.07833
bin4	Shorter_uORF	1.02716
bin4	Shorter_uORF	2.17051
bin4	Shorter_uORF	0.683794
bin4	Shorter_uORF	1.7873
bin4	Shorter_uORF	1.0008
bin4	Shorter_uORF	1.43246
bin4	Shorter_uORF	0.748709
bin4	Shorter_uORF	4.64845
bin4	Shorter_uORF	0.876678
bin4	Shorter_uORF	0.642632
bin4	Shorter_uORF	0.688389
bin4	Shorter_uORF	1.69172
bin4	Shorter_uORF	3.02718
bin4	Shorter_uORF	0.97792
bin4	Shorter_uORF	1.25026
bin4	Shorter_uORF	0.618046
bin4	Shorter_uORF	0.850011
bin4	Shorter_uORF	1.73976
bin4	Shorter_uORF	0.741287
bin4	Shorter_uORF	1.40235
bin4	Shorter_uORF	1.32304
bin4	Shorter_uORF	2.35331
bin4	Shorter_uORF	1.17066
bin4	Shorter_uORF	1.86367
bin4	Shorter_uORF	1.522
bin4	Shorter_uORF	0.912834
bin4	Shorter_uORF	1.22857
bin4	Shorter_uORF	1.15842
bin4	Shorter_uORF	2.64672
bin4	Shorter_uORF	1.04782
bin4	Shorter_uORF	2.05748
bin4	Shorter_uORF	0.844106
bin4	Shorter_uORF	0.552884
bin4	Shorter_uORF	1.07569
bin4	Shorter_uORF	1.91518
bin4	Shorter_uORF	0.684235
bin4	Shorter_uORF	0.781625
bin4	Shorter_uORF	1.70721
bin4	Shorter_uORF	2.51565
bin4	Shorter_uORF	0.927299
bin4	Shorter_uORF	0
bin4	Shorter_uORF	1.21393
bin4	Shorter_uORF	2.69165
bin4	Shorter_uORF	0.665235
bin4	Shorter_uORF	0.735305
bin4	Shorter_uORF	0.972901
bin4	Shorter_uORF	0.728961
bin4	Shorter_uORF	0.679096
bin4	Shorter_uORF	1.35137
bin4	Shorter_uORF	0.995676
bin4	Shorter_uORF	0.835028
bin4	Shorter_uORF	2.12573
bin4	Shorter_uORF	1.33568
bin4	Shorter_uORF	1.37379
bin4	Shorter_uORF	1.96383
bin4	Shorter_uORF	1.141
bin4	Shorter_uORF	1.40154
bin4	Shorter_uORF	3.03647
bin4	Shorter_uORF	3.92875
bin4	Shorter_uORF	1.4543
bin4	Shorter_uORF	1.96831
bin4	Shorter_uORF	1.414
bin4	Shorter_uORF	1.84902
bin4	Shorter_uORF	0.5737
bin4	Shorter_uORF	0.548905
bin4	Longer_uORF	1.01628
bin4	Longer_uORF	1.09895
bin4	Longer_uORF	0.682474
bin4	Longer_uORF	0.622741
bin4	Longer_uORF	1.21766
bin4	Longer_uORF	0.602449
bin4	Longer_uORF	0.597654
bin4	Longer_uORF	1.67906
bin4	Longer_uORF	1.56288
bin4	Longer_uORF	0.725947
bin4	Longer_uORF	1.45425
bin4	Longer_uORF	0.594865
bin4	Longer_uORF	1.69241
bin4	Longer_uORF	0.477925
bin4	Longer_uORF	0.654573
bin4	Longer_uORF	1.60753
bin4	Longer_uORF	1.49855
bin4	Longer_uORF	0.933839
bin4	Longer_uORF	1.35991
bin4	Longer_uORF	0.719594
bin4	Longer_uORF	0.642694
bin4	Longer_uORF	1.04102
bin4	Longer_uORF	1.0618
bin4	Longer_uORF	1.36946
bin4	Longer_uORF	0.721761
bin4	Longer_uORF	1.34926
bin4	Longer_uORF	0.619077
bin4	Longer_uORF	1.98862
bin4	Longer_uORF	1.45788
bin4	Longer_uORF	0.70902
bin4	Longer_uORF	1.51474
bin4	Longer_uORF	1.08618
bin4	Longer_uORF	1.17222
bin4	Longer_uORF	0.610883
bin4	Longer_uORF	1.33988
bin4	Longer_uORF	0.805079
bin4	Longer_uORF	1.30622
bin4	Longer_uORF	0.660335
bin4	Longer_uORF	1.03992
bin4	Longer_uORF	1.25175
bin4	Longer_uORF	0.733891
bin4	Longer_uORF	0.756676
bin4	Longer_uORF	0.642523
bin4	Longer_uORF	0.608036
bin4	Longer_uORF	0.846918
bin4	Longer_uORF	1.35909
bin4	Longer_uORF	2.08296
bin4	Longer_uORF	1.97023
bin4	Longer_uORF	0.971471
bin4	Longer_uORF	0.821991
bin4	Longer_uORF	0.686081
bin4	Longer_uORF	1.41784
bin4	Longer_uORF	0.806914
bin4	Longer_uORF	1.34588
bin4	Longer_uORF	0.719638
bin4	Longer_uORF	1.04243
bin4	Longer_uORF	1.61515
bin4	Longer_uORF	1.14692
bin4	Longer_uORF	0.87677
bin4	Longer_uORF	0.648623
bin4	Longer_uORF	1.37256
bin4	Longer_uORF	1.20036
bin4	Longer_uORF	1.19925
bin4	Longer_uORF	0.925722
bin4	Longer_uORF	1.25082
bin4	Longer_uORF	1.52007
bin4	Longer_uORF	1.87125
bin4	Longer_uORF	0.958652
bin4	Longer_uORF	0.689227
bin4	Longer_uORF	0.45121
bin4	Longer_uORF	0.960844
bin4	Longer_uORF	3.72217
bin4	Longer_uORF	0.727682
bin4	Longer_uORF	2.42764
bin4	Longer_uORF	1.04362
bin4	Longer_uORF	0.868268
bin4	Longer_uORF	1.19893
bin4	Longer_uORF	1.66284
bin4	Longer_uORF	1.02952
bin4	Longer_uORF	1.05008
bin4	Longer_uORF	0.468899
bin4	Longer_uORF	1.20489
bin4	Longer_uORF	1.55202
bin4	Longer_uORF	1.35009
bin4	Longer_uORF	1.15735
bin4	Longer_uORF	1.58971
bin4	Longer_uORF	0.445159
bin4	Longer_uORF	0.948924
bin4	Longer_uORF	1.13326
bin4	Longer_uORF	1.40522
bin4	Longer_uORF	1.81295
bin4	Longer_uORF	1.31601
bin4	Longer_uORF	0.690983
bin4	Longer_uORF	1.3956
bin4	Longer_uORF	0.881717
bin4	Longer_uORF	0.548328
bin4	Longer_uORF	0.443298
bin4	Longer_uORF	1.87946
bin4	Longer_uORF	1.4127
bin4	Longer_uORF	1.69165
bin4	Longer_uORF	0.816255
bin4	Longer_uORF	1.25081
bin4	Longer_uORF	1.63799
bin4	Longer_uORF	1.3979
bin4	Longer_uORF	0.731879
bin4	Longer_uORF	0.50306
bin4	Longer_uORF	1.41566
bin4	Longer_uORF	1.35421
bin4	Longer_uORF	0.982035
bin4	Longer_uORF	0.593672
bin4	Longer_uORF	1.4639
bin4	Longer_uORF	0.425403
bin4	Longer_uORF	1.72153
bin4	Longer_uORF	1.79193
bin4	Longer_uORF	0.519447
bin4	Longer_uORF	1.38257
bin4	Longer_uORF	0.474425
bin4	Longer_uORF	0.813432
bin4	Longer_uORF	0.7553
bin4	Longer_uORF	1.42188
bin4	Longer_uORF	0.921281
bin4	Longer_uORF	1.04629
bin4	Longer_uORF	0.684491
bin4	Longer_uORF	0.957379
bin4	Longer_uORF	1.73247
bin4	Longer_uORF	0.796059
bin4	Longer_uORF	1.26358
bin4	Longer_uORF	1.05553
bin5	Shorter_uORF	0.609039
bin5	Shorter_uORF	0.941604
bin5	Shorter_uORF	1.40841
bin5	Shorter_uORF	3.62992
bin5	Shorter_uORF	2.19224
bin5	Shorter_uORF	2.0995
bin5	Shorter_uORF	1.69909
bin5	Shorter_uORF	1.17274
bin5	Shorter_uORF	0.698738
bin5	Shorter_uORF	1.56587
bin5	Shorter_uORF	1.94613
bin5	Shorter_uORF	1.55523
bin5	Shorter_uORF	1.70151
bin5	Shorter_uORF	3.06235
bin5	Shorter_uORF	1.26584
bin5	Shorter_uORF	1.31281
bin5	Shorter_uORF	0.950761
bin5	Shorter_uORF	1.32376
bin5	Shorter_uORF	0.585608
bin5	Shorter_uORF	0.741375
bin5	Shorter_uORF	1.77376
bin5	Shorter_uORF	0.861096
bin5	Shorter_uORF	1.34332
bin5	Shorter_uORF	0.962115
bin5	Shorter_uORF	0.577017
bin5	Shorter_uORF	1.9889
bin5	Shorter_uORF	0.83426
bin5	Shorter_uORF	0.835481
bin5	Shorter_uORF	2.0595
bin5	Shorter_uORF	1.39875
bin5	Shorter_uORF	0.80701
bin5	Shorter_uORF	1.80466
bin5	Shorter_uORF	1.03622
bin5	Shorter_uORF	0.599757
bin5	Shorter_uORF	1.00289
bin5	Shorter_uORF	0.616781
bin5	Shorter_uORF	4.55578
bin5	Shorter_uORF	0.777816
bin5	Shorter_uORF	0.926685
bin5	Shorter_uORF	1.40491
bin5	Shorter_uORF	0.856417
bin5	Shorter_uORF	0.578574
bin5	Shorter_uORF	1.2729
bin5	Shorter_uORF	1.71826
bin5	Shorter_uORF	3.25175
bin5	Shorter_uORF	0.825434
bin5	Shorter_uORF	1.16014
bin5	Shorter_uORF	0.602306
bin5	Shorter_uORF	1.89103
bin5	Shorter_uORF	1.4395
bin5	Shorter_uORF	0.821958
bin5	Shorter_uORF	1.41552
bin5	Shorter_uORF	0.708606
bin5	Shorter_uORF	0.871598
bin5	Shorter_uORF	1.18677
bin5	Shorter_uORF	1.47737
bin5	Shorter_uORF	2.21999
bin5	Shorter_uORF	2.41732
bin5	Shorter_uORF	1.5834
bin5	Shorter_uORF	1.01334
bin5	Shorter_uORF	1.45551
bin5	Shorter_uORF	0.496715
bin5	Shorter_uORF	0.744749
bin5	Shorter_uORF	2.59627
bin5	Shorter_uORF	0.956925
bin5	Shorter_uORF	0.700996
bin5	Shorter_uORF	0.810764
bin5	Shorter_uORF	0.772598
bin5	Shorter_uORF	3.87619
bin5	Shorter_uORF	0.751965
bin5	Shorter_uORF	1.01342
bin5	Shorter_uORF	0.552579
bin5	Shorter_uORF	0.97397
bin5	Shorter_uORF	1.41063
bin5	Shorter_uORF	0.761764
bin5	Shorter_uORF	0.565152
bin5	Shorter_uORF	0.815432
bin5	Shorter_uORF	1.07004
bin5	Shorter_uORF	1.63136
bin5	Shorter_uORF	1.68328
bin5	Shorter_uORF	1.45391
bin5	Shorter_uORF	0.759732
bin5	Shorter_uORF	3.12269
bin5	Shorter_uORF	0.766686
bin5	Shorter_uORF	0.524094
bin5	Shorter_uORF	2.01935
bin5	Shorter_uORF	1.97382
bin5	Shorter_uORF	0.573624
bin5	Shorter_uORF	0.758614
bin5	Shorter_uORF	1.9041
bin5	Shorter_uORF	1.70394
bin5	Shorter_uORF	1.12955
bin5	Shorter_uORF	0.851609
bin5	Shorter_uORF	1.9434
bin5	Shorter_uORF	1.16899
bin5	Shorter_uORF	1.23622
bin5	Shorter_uORF	0.447383
bin5	Shorter_uORF	0.587946
bin5	Shorter_uORF	2.02419
bin5	Shorter_uORF	0.830068
bin5	Shorter_uORF	1.02578
bin5	Shorter_uORF	1.21863
bin5	Shorter_uORF	2.34609
bin5	Shorter_uORF	1.46013
bin5	Shorter_uORF	0.645082
bin5	Shorter_uORF	0.805792
bin5	Shorter_uORF	0.756734
bin5	Shorter_uORF	0.84087
bin5	Shorter_uORF	1.60232
bin5	Shorter_uORF	2.16652
bin5	Shorter_uORF	0.556162
bin5	Shorter_uORF	0.854703
bin5	Shorter_uORF	0.681645
bin5	Shorter_uORF	0.453314
bin5	Shorter_uORF	3.45517
bin5	Shorter_uORF	1.04876
bin5	Shorter_uORF	0.683042
bin5	Shorter_uORF	1.4539
bin5	Shorter_uORF	0.649521
bin5	Shorter_uORF	0.899772
bin5	Shorter_uORF	1.83053
bin5	Shorter_uORF	1.30393
bin5	Shorter_uORF	0.866312
bin5	Shorter_uORF	0.876369
bin5	Shorter_uORF	0.76936
bin5	Shorter_uORF	0.798358
bin5	Shorter_uORF	1.08812
bin5	Shorter_uORF	1.23053
bin5	Longer_uORF	1.52055
bin5	Longer_uORF	0.986396
bin5	Longer_uORF	1.94491
bin5	Longer_uORF	0.674187
bin5	Longer_uORF	0.624199
bin5	Longer_uORF	0.681082
bin5	Longer_uORF	0.921861
bin5	Longer_uORF	1.57576
bin5	Longer_uORF	1.08584
bin5	Longer_uORF	0.475053
bin5	Longer_uORF	1.32189
bin5	Longer_uORF	0.751432
bin5	Longer_uORF	1.53474
bin5	Longer_uORF	3.14328
bin5	Longer_uORF	1.26887
bin5	Longer_uORF	1.90885
bin5	Longer_uORF	0.781467
bin5	Longer_uORF	1.61127
bin5	Longer_uORF	0.905371
bin5	Longer_uORF	1.0946
bin5	Longer_uORF	1.59991
bin5	Longer_uORF	1.5331
bin5	Longer_uORF	1.74277
bin5	Longer_uORF	0.620437
bin5	Longer_uORF	1.84403
bin5	Longer_uORF	1.56326
bin5	Longer_uORF	0.575172
bin5	Longer_uORF	1.93524
bin5	Longer_uORF	0.547419
bin5	Longer_uORF	1.68987
bin5	Longer_uORF	5.2934
bin5	Longer_uORF	1.03505
bin5	Longer_uORF	0.81193
bin5	Longer_uORF	1.23075
bin5	Longer_uORF	1.29705
bin5	Longer_uORF	0.576982
bin5	Longer_uORF	1.43864
bin5	Longer_uORF	1.67269
bin5	Longer_uORF	1.80638
bin5	Longer_uORF	0.654908
bin5	Longer_uORF	0.81768
bin5	Longer_uORF	0.708507
bin5	Longer_uORF	0.608389
bin5	Longer_uORF	0.492823
bin5	Longer_uORF	0.691324
bin5	Longer_uORF	2.22895
bin5	Longer_uORF	1.59302
bin5	Longer_uORF	1.96583
bin5	Longer_uORF	1.1458
bin5	Longer_uORF	0.576297
bin5	Longer_uORF	1.41181
bin5	Longer_uORF	0.66767
bin5	Longer_uORF	0.669756
bin5	Longer_uORF	0.796466
bin5	Longer_uORF	0.444901
bin5	Longer_uORF	1.40614
bin5	Longer_uORF	1.15332
bin5	Longer_uORF	0.502823
bin5	Longer_uORF	2.00098
bin5	Longer_uORF	0.684035
bin5	Longer_uORF	1.43795
bin5	Longer_uORF	1.63758
bin5	Longer_uORF	0.911661
bin5	Longer_uORF	0.538424
bin5	Longer_uORF	0.604212
bin5	Longer_uORF	2.18395
bin5	Longer_uORF	1.1785
bin5	Longer_uORF	0.967413
bin5	Longer_uORF	0.658902
bin5	Longer_uORF	0.595244
bin5	Longer_uORF	0.72782
bin5	Longer_uORF	3.25034
bin5	Longer_uORF	0.549214
bin5	Longer_uORF	0.932619
bin5	Longer_uORF	1.51229
bin5	Longer_uORF	1.99307
bin5	Longer_uORF	0.599694
bin5	Longer_uORF	1.47544
bin5	Longer_uORF	1.12081
bin5	Longer_uORF	0.700509
bin5	Longer_uORF	0.862395
bin5	Longer_uORF	1.44178
bin5	Longer_uORF	0.760726
bin5	Longer_uORF	1.51503
bin5	Longer_uORF	0.718981
bin5	Longer_uORF	2.22362
bin5	Longer_uORF	0.622804
bin5	Longer_uORF	2.39218
bin5	Longer_uORF	2.65114
bin5	Longer_uORF	0.528864
bin5	Longer_uORF	0.702437
bin5	Longer_uORF	1.36025
bin5	Longer_uORF	1.38679
bin5	Longer_uORF	0.501606
bin5	Longer_uORF	2.56607
bin5	Longer_uORF	1.24793
bin5	Longer_uORF	0.580389
bin5	Longer_uORF	0.562326
bin5	Longer_uORF	0.636279
bin5	Longer_uORF	0.56782
bin5	Longer_uORF	1.0174
bin5	Longer_uORF	1.69244
bin5	Longer_uORF	4.85407
bin5	Longer_uORF	0.511946
bin5	Longer_uORF	0.609273
bin5	Longer_uORF	1.0581
bin5	Longer_uORF	0.505224
bin5	Longer_uORF	2.52398
bin5	Longer_uORF	0.880784
bin5	Longer_uORF	1.20264
bin5	Longer_uORF	0.628774
bin5	Longer_uORF	0.857839
bin5	Longer_uORF	0.53874
bin5	Longer_uORF	1.42889
bin5	Longer_uORF	1.27727
bin5	Longer_uORF	0.772832
bin5	Longer_uORF	1.8274
bin5	Longer_uORF	1.60792
bin5	Longer_uORF	0.487279
bin5	Longer_uORF	0.568032
bin5	Longer_uORF	2.43712
bin5	Longer_uORF	1.59943
bin5	Longer_uORF	1.20716
bin5	Longer_uORF	0.671578
bin5	Longer_uORF	1.9327
bin5	Longer_uORF	0.616467
bin5	Longer_uORF	0.465145
bin5	Longer_uORF	0.650338
bin6	Shorter_uORF	0.70586
bin6	Shorter_uORF	0.58081
bin6	Shorter_uORF	1.41663
bin6	Shorter_uORF	2.36216
bin6	Shorter_uORF	0.90399
bin6	Shorter_uORF	0.702269
bin6	Shorter_uORF	2.05026
bin6	Shorter_uORF	0.726304
bin6	Shorter_uORF	1.00876
bin6	Shorter_uORF	1.67128
bin6	Shorter_uORF	2.01157
bin6	Shorter_uORF	0.922518
bin6	Shorter_uORF	0.760941
bin6	Shorter_uORF	0.835667
bin6	Shorter_uORF	0.680281
bin6	Shorter_uORF	0.540984
bin6	Shorter_uORF	1.58801
bin6	Shorter_uORF	2.0932
bin6	Shorter_uORF	1.61247
bin6	Shorter_uORF	2.38472
bin6	Shorter_uORF	1.72003
bin6	Shorter_uORF	1.948
bin6	Shorter_uORF	0.627335
bin6	Shorter_uORF	3.48466
bin6	Shorter_uORF	0.602381
bin6	Shorter_uORF	0.516622
bin6	Shorter_uORF	0.54318
bin6	Shorter_uORF	0.765962
bin6	Shorter_uORF	1.8613
bin6	Shorter_uORF	1.87313
bin6	Shorter_uORF	2.50136
bin6	Shorter_uORF	0.69642
bin6	Shorter_uORF	1.17878
bin6	Shorter_uORF	0.633874
bin6	Shorter_uORF	0.78044
bin6	Shorter_uORF	0.644191
bin6	Shorter_uORF	0.855901
bin6	Shorter_uORF	0.961477
bin6	Shorter_uORF	0.470398
bin6	Shorter_uORF	0.778111
bin6	Shorter_uORF	0.68011
bin6	Shorter_uORF	0.85715
bin6	Shorter_uORF	2.57402
bin6	Shorter_uORF	2.08332
bin6	Shorter_uORF	0.845539
bin6	Shorter_uORF	1.05842
bin6	Shorter_uORF	1.55589
bin6	Shorter_uORF	1.45152
bin6	Shorter_uORF	0.570247
bin6	Shorter_uORF	2.35546
bin6	Shorter_uORF	1.70858
bin6	Shorter_uORF	0.832583
bin6	Shorter_uORF	0.993808
bin6	Shorter_uORF	1.61213
bin6	Shorter_uORF	0.660418
bin6	Shorter_uORF	0.717244
bin6	Shorter_uORF	0.954534
bin6	Shorter_uORF	1.40089
bin6	Shorter_uORF	0.821724
bin6	Shorter_uORF	0.951381
bin6	Shorter_uORF	0.577872
bin6	Shorter_uORF	3.15317
bin6	Shorter_uORF	3.29593
bin6	Shorter_uORF	0.796031
bin6	Shorter_uORF	0.774367
bin6	Shorter_uORF	0.902696
bin6	Shorter_uORF	2.1359
bin6	Shorter_uORF	1.14638
bin6	Shorter_uORF	1.43131
bin6	Shorter_uORF	0.847429
bin6	Shorter_uORF	0.851232
bin6	Shorter_uORF	2.29367
bin6	Shorter_uORF	0.702503
bin6	Shorter_uORF	1.03761
bin6	Shorter_uORF	2.14659
bin6	Shorter_uORF	0.7094
bin6	Shorter_uORF	1.88114
bin6	Shorter_uORF	0.592791
bin6	Shorter_uORF	0.627082
bin6	Shorter_uORF	0.544367
bin6	Shorter_uORF	0.807488
bin6	Shorter_uORF	0.721385
bin6	Shorter_uORF	2.30885
bin6	Shorter_uORF	0.678025
bin6	Shorter_uORF	0.430157
bin6	Shorter_uORF	2.03858
bin6	Shorter_uORF	0.465154
bin6	Shorter_uORF	1.12218
bin6	Shorter_uORF	1.83554
bin6	Shorter_uORF	1.10579
bin6	Shorter_uORF	2.1256
bin6	Shorter_uORF	2.57847
bin6	Shorter_uORF	0.676045
bin6	Shorter_uORF	0.88067
bin6	Shorter_uORF	4.17987
bin6	Shorter_uORF	0.586358
bin6	Shorter_uORF	1.75145
bin6	Shorter_uORF	1.79842
bin6	Shorter_uORF	0.665408
bin6	Shorter_uORF	2.31613
bin6	Shorter_uORF	1.4699
bin6	Shorter_uORF	0.481406
bin6	Shorter_uORF	0.549041
bin6	Shorter_uORF	1.51004
bin6	Shorter_uORF	1.71565
bin6	Shorter_uORF	0.681252
bin6	Shorter_uORF	2.86674
bin6	Shorter_uORF	0.599799
bin6	Shorter_uORF	0.540036
bin6	Shorter_uORF	0.778299
bin6	Shorter_uORF	2.09089
bin6	Shorter_uORF	1.49809
bin6	Shorter_uORF	0.775467
bin6	Shorter_uORF	0.762178
bin6	Shorter_uORF	0.657679
bin6	Shorter_uORF	0.765317
bin6	Shorter_uORF	1.28559
bin6	Shorter_uORF	0.741826
bin6	Shorter_uORF	0.513376
bin6	Shorter_uORF	1.46401
bin6	Shorter_uORF	2.12565
bin6	Shorter_uORF	1.12574
bin6	Shorter_uORF	0.561131
bin6	Shorter_uORF	4.23539
bin6	Shorter_uORF	0.605233
bin6	Shorter_uORF	0.553222
bin6	Shorter_uORF	0.990677
bin6	Shorter_uORF	1.01561
bin6	Longer_uORF	1.20541
bin6	Longer_uORF	0.576973
bin6	Longer_uORF	0.455126
bin6	Longer_uORF	0.594414
bin6	Longer_uORF	0.815522
bin6	Longer_uORF	2.02804
bin6	Longer_uORF	0.424594
bin6	Longer_uORF	0.629674
bin6	Longer_uORF	1.30629
bin6	Longer_uORF	2.08222
bin6	Longer_uORF	0.459832
bin6	Longer_uORF	1.9199
bin6	Longer_uORF	0.691679
bin6	Longer_uORF	2.23013
bin6	Longer_uORF	1.71598
bin6	Longer_uORF	0.606683
bin6	Longer_uORF	2.03934
bin6	Longer_uORF	1.40762
bin6	Longer_uORF	1.00125
bin6	Longer_uORF	0.762864
bin6	Longer_uORF	1.10566
bin6	Longer_uORF	0.770432
bin6	Longer_uORF	0.87102
bin6	Longer_uORF	0.643748
bin6	Longer_uORF	2.07675
bin6	Longer_uORF	0.669969
bin6	Longer_uORF	1.74427
bin6	Longer_uORF	1.54681
bin6	Longer_uORF	2.21442
bin6	Longer_uORF	1.53472
bin6	Longer_uORF	1.85916
bin6	Longer_uORF	0.55903
bin6	Longer_uORF	0.500437
bin6	Longer_uORF	0.589664
bin6	Longer_uORF	0.800016
bin6	Longer_uORF	0.958103
bin6	Longer_uORF	0.637046
bin6	Longer_uORF	0.994992
bin6	Longer_uORF	0.736278
bin6	Longer_uORF	0.526862
bin6	Longer_uORF	1.20944
bin6	Longer_uORF	0.688099
bin6	Longer_uORF	1.03076
bin6	Longer_uORF	0.864596
bin6	Longer_uORF	0.476623
bin6	Longer_uORF	1.45551
bin6	Longer_uORF	1.44096
bin6	Longer_uORF	0.631331
bin6	Longer_uORF	0.749721
bin6	Longer_uORF	0.595782
bin6	Longer_uORF	1.01517
bin6	Longer_uORF	4.89541
bin6	Longer_uORF	0.713499
bin6	Longer_uORF	1.05385
bin6	Longer_uORF	0.367578
bin6	Longer_uORF	0.553541
bin6	Longer_uORF	1.10607
bin6	Longer_uORF	2.77273
bin6	Longer_uORF	1.82769
bin6	Longer_uORF	0.989986
bin6	Longer_uORF	0.610959
bin6	Longer_uORF	1.02616
bin6	Longer_uORF	0.763927
bin6	Longer_uORF	0.731531
bin6	Longer_uORF	3.04452
bin6	Longer_uORF	1.02093
bin6	Longer_uORF	0.707376
bin6	Longer_uORF	1.15437
bin6	Longer_uORF	0.592978
bin6	Longer_uORF	0.575974
bin6	Longer_uORF	1.51315
bin6	Longer_uORF	0.545551
bin6	Longer_uORF	1.91722
bin6	Longer_uORF	2.01504
bin6	Longer_uORF	2.42155
bin6	Longer_uORF	0.784521
bin6	Longer_uORF	1.14447
bin6	Longer_uORF	2.03239
bin6	Longer_uORF	0.586492
bin6	Longer_uORF	0.844645
bin6	Longer_uORF	0.592634
bin6	Longer_uORF	0.913411
bin6	Longer_uORF	1.03089
bin6	Longer_uORF	0.572427
bin6	Longer_uORF	0.797002
bin6	Longer_uORF	1.17994
bin6	Longer_uORF	0.566348
bin6	Longer_uORF	2.41922
bin6	Longer_uORF	0.54675
bin6	Longer_uORF	0.789286
bin6	Longer_uORF	0.513221
bin6	Longer_uORF	1.02645
bin6	Longer_uORF	0.62397
bin6	Longer_uORF	0.796694
bin6	Longer_uORF	1.46814
bin6	Longer_uORF	0.768943
bin6	Longer_uORF	0.705651
bin6	Longer_uORF	2.23652
bin6	Longer_uORF	0.697997
bin6	Longer_uORF	0.560097
bin6	Longer_uORF	0.667136
bin6	Longer_uORF	0.665545
bin6	Longer_uORF	0.669034
bin6	Longer_uORF	1.10449
bin6	Longer_uORF	0.480861
bin6	Longer_uORF	0.560437
bin6	Longer_uORF	0.545048
bin6	Longer_uORF	0.959734
bin6	Longer_uORF	0.623812
bin6	Longer_uORF	0.781918
bin6	Longer_uORF	1.71431
bin6	Longer_uORF	0.96971
bin6	Longer_uORF	0.838323
bin6	Longer_uORF	1.08738
bin6	Longer_uORF	1.17396
bin6	Longer_uORF	0.893087
bin6	Longer_uORF	1.83107
bin6	Longer_uORF	0.515318
bin6	Longer_uORF	0.757863
bin6	Longer_uORF	0.726835
bin6	Longer_uORF	1.85286
bin6	Longer_uORF	0.771031
bin6	Longer_uORF	2.41349
bin6	Longer_uORF	0.932911
bin6	Longer_uORF	0.617471
bin6	Longer_uORF	0.96412
bin6	Longer_uORF	0.625712
bin7	Shorter_uORF	0.657764
bin7	Shorter_uORF	0.752661
bin7	Shorter_uORF	1.8529
bin7	Shorter_uORF	0.823325
bin7	Shorter_uORF	0.633744
bin7	Shorter_uORF	0.746288
bin7	Shorter_uORF	0.675003
bin7	Shorter_uORF	0.658121
bin7	Shorter_uORF	0.543175
bin7	Shorter_uORF	0.487784
bin7	Shorter_uORF	0.81474
bin7	Shorter_uORF	0.918342
bin7	Shorter_uORF	0.675491
bin7	Shorter_uORF	0.658036
bin7	Shorter_uORF	0.627963
bin7	Shorter_uORF	0.498022
bin7	Shorter_uORF	0.591107
bin7	Shorter_uORF	2.68958
bin7	Shorter_uORF	0.576649
bin7	Shorter_uORF	1.09313
bin7	Shorter_uORF	0.832214
bin7	Shorter_uORF	0.542806
bin7	Shorter_uORF	1.3168
bin7	Shorter_uORF	1.00767
bin7	Shorter_uORF	1.09255
bin7	Shorter_uORF	0.534121
bin7	Shorter_uORF	0.538207
bin7	Shorter_uORF	0.621525
bin7	Shorter_uORF	0.457862
bin7	Shorter_uORF	1.1603
bin7	Shorter_uORF	0.470595
bin7	Shorter_uORF	3.92749
bin7	Shorter_uORF	0.811795
bin7	Shorter_uORF	0.875502
bin7	Shorter_uORF	0.524282
bin7	Shorter_uORF	0.495403
bin7	Shorter_uORF	0.72997
bin7	Shorter_uORF	0.550329
bin7	Shorter_uORF	0.72845
bin7	Shorter_uORF	1.13831
bin7	Shorter_uORF	1.80381
bin7	Shorter_uORF	0.82074
bin7	Shorter_uORF	0.889823
bin7	Shorter_uORF	0.547014
bin7	Shorter_uORF	0.65291
bin7	Shorter_uORF	0.980038
bin7	Shorter_uORF	2.23529
bin7	Shorter_uORF	0.848607
bin7	Shorter_uORF	3.62396
bin7	Shorter_uORF	0.959226
bin7	Shorter_uORF	0.586114
bin7	Shorter_uORF	3.09987
bin7	Shorter_uORF	0.781975
bin7	Shorter_uORF	1.47235
bin7	Shorter_uORF	0.799571
bin7	Shorter_uORF	0.523525
bin7	Shorter_uORF	0.515267
bin7	Shorter_uORF	1.9561
bin7	Shorter_uORF	0.648857
bin7	Shorter_uORF	1.47958
bin7	Shorter_uORF	0.975583
bin7	Shorter_uORF	2.47996
bin7	Shorter_uORF	1.95098
bin7	Shorter_uORF	0.661068
bin7	Shorter_uORF	2.18382
bin7	Shorter_uORF	1.3734
bin7	Shorter_uORF	0.472924
bin7	Shorter_uORF	0.681323
bin7	Shorter_uORF	0.883688
bin7	Shorter_uORF	1.12093
bin7	Shorter_uORF	0.576403
bin7	Shorter_uORF	2.54086
bin7	Shorter_uORF	0.955453
bin7	Shorter_uORF	4.44577
bin7	Shorter_uORF	1.97564
bin7	Shorter_uORF	1.77604
bin7	Shorter_uORF	0.544992
bin7	Shorter_uORF	0.639783
bin7	Shorter_uORF	0.780608
bin7	Shorter_uORF	0.646988
bin7	Shorter_uORF	0.534086
bin7	Shorter_uORF	0.733768
bin7	Shorter_uORF	1.20941
bin7	Shorter_uORF	4.57542
bin7	Shorter_uORF	0.444065
bin7	Shorter_uORF	0.602028
bin7	Shorter_uORF	0.55676
bin7	Shorter_uORF	0.497739
bin7	Shorter_uORF	0.439457
bin7	Shorter_uORF	0.843725
bin7	Shorter_uORF	0.607719
bin7	Shorter_uORF	0.932873
bin7	Shorter_uORF	0.873255
bin7	Shorter_uORF	0.91547
bin7	Shorter_uORF	0.545584
bin7	Shorter_uORF	1.26443
bin7	Shorter_uORF	0.832713
bin7	Shorter_uORF	0.656153
bin7	Shorter_uORF	2.12432
bin7	Shorter_uORF	1.06295
bin7	Shorter_uORF	1.23251
bin7	Shorter_uORF	0.529865
bin7	Shorter_uORF	0.97899
bin7	Shorter_uORF	3.74836
bin7	Shorter_uORF	0.591867
bin7	Shorter_uORF	1.29614
bin7	Shorter_uORF	3.07615
bin7	Shorter_uORF	1.3901
bin7	Shorter_uORF	1.23989
bin7	Shorter_uORF	0.502297
bin7	Shorter_uORF	0.41283
bin7	Shorter_uORF	0.783194
bin7	Shorter_uORF	2.36281
bin7	Shorter_uORF	0.698125
bin7	Shorter_uORF	0.535769
bin7	Shorter_uORF	0.860071
bin7	Shorter_uORF	0.729876
bin7	Shorter_uORF	2.38432
bin7	Shorter_uORF	1.05396
bin7	Shorter_uORF	0.586658
bin7	Shorter_uORF	1.65717
bin7	Shorter_uORF	1.74966
bin7	Shorter_uORF	0.640048
bin7	Shorter_uORF	0.636698
bin7	Shorter_uORF	0.776198
bin7	Shorter_uORF	0.483971
bin7	Shorter_uORF	2.08133
bin7	Shorter_uORF	0.662271
bin7	Shorter_uORF	0.431467
bin7	Shorter_uORF	1.00669
bin7	Longer_uORF	0.477598
bin7	Longer_uORF	2.22916
bin7	Longer_uORF	0.470128
bin7	Longer_uORF	0.807288
bin7	Longer_uORF	2.68105
bin7	Longer_uORF	1.46819
bin7	Longer_uORF	1.49383
bin7	Longer_uORF	0.533535
bin7	Longer_uORF	2.06477
bin7	Longer_uORF	0.954729
bin7	Longer_uORF	2.2163
bin7	Longer_uORF	1.70389
bin7	Longer_uORF	0.67686
bin7	Longer_uORF	0.719685
bin7	Longer_uORF	2.36262
bin7	Longer_uORF	0.604448
bin7	Longer_uORF	1.12942
bin7	Longer_uORF	0.762859
bin7	Longer_uORF	0.478662
bin7	Longer_uORF	0.683333
bin7	Longer_uORF	1.50639
bin7	Longer_uORF	0.534681
bin7	Longer_uORF	1.43385
bin7	Longer_uORF	0.777746
bin7	Longer_uORF	0.800461
bin7	Longer_uORF	2.9291
bin7	Longer_uORF	0.550008
bin7	Longer_uORF	0.432595
bin7	Longer_uORF	0.820185
bin7	Longer_uORF	0.685275
bin7	Longer_uORF	0.557925
bin7	Longer_uORF	0.837419
bin7	Longer_uORF	0.65874
bin7	Longer_uORF	0.411459
bin7	Longer_uORF	0.575248
bin7	Longer_uORF	0.821676
bin7	Longer_uORF	1.69246
bin7	Longer_uORF	2.21489
bin7	Longer_uORF	2.82774
bin7	Longer_uORF	0.559436
bin7	Longer_uORF	0.561784
bin7	Longer_uORF	0.524538
bin7	Longer_uORF	0.615602
bin7	Longer_uORF	0.684036
bin7	Longer_uORF	0.581454
bin7	Longer_uORF	2.43675
bin7	Longer_uORF	2.1155
bin7	Longer_uORF	4.17231
bin7	Longer_uORF	0.938419
bin7	Longer_uORF	0.835392
bin7	Longer_uORF	1.30127
bin7	Longer_uORF	1.73595
bin7	Longer_uORF	0.948689
bin7	Longer_uORF	0.853284
bin7	Longer_uORF	0.804135
bin7	Longer_uORF	0.540054
bin7	Longer_uORF	1.0048
bin7	Longer_uORF	0.454726
bin7	Longer_uORF	0.742773
bin7	Longer_uORF	0.508202
bin7	Longer_uORF	0.516866
bin7	Longer_uORF	2.32369
bin7	Longer_uORF	1.02485
bin7	Longer_uORF	0.599385
bin7	Longer_uORF	0.670834
bin7	Longer_uORF	0.646712
bin7	Longer_uORF	0.742152
bin7	Longer_uORF	0.787962
bin7	Longer_uORF	0.636448
bin7	Longer_uORF	1.68734
bin7	Longer_uORF	0.536283
bin7	Longer_uORF	0.691499
bin7	Longer_uORF	0.873518
bin7	Longer_uORF	2.69052
bin7	Longer_uORF	0.562424
bin7	Longer_uORF	0.466741
bin7	Longer_uORF	0.599963
bin7	Longer_uORF	0.498293
bin7	Longer_uORF	0.603502
bin7	Longer_uORF	2.12542
bin7	Longer_uORF	0.506934
bin7	Longer_uORF	1.00397
bin7	Longer_uORF	2.73501
bin7	Longer_uORF	0.475916
bin7	Longer_uORF	0.707191
bin7	Longer_uORF	0.6918
bin7	Longer_uORF	0.592931
bin7	Longer_uORF	0.974058
bin7	Longer_uORF	0.787955
bin7	Longer_uORF	0.63331
bin7	Longer_uORF	2.68428
bin7	Longer_uORF	0.618684
bin7	Longer_uORF	0.954614
bin7	Longer_uORF	3.85374
bin7	Longer_uORF	0.825182
bin7	Longer_uORF	0.677766
bin7	Longer_uORF	2.09104
bin7	Longer_uORF	0.676144
bin7	Longer_uORF	2.82945
bin7	Longer_uORF	0.505824
bin7	Longer_uORF	0.588708
bin7	Longer_uORF	0.90623
bin7	Longer_uORF	0.536536
bin7	Longer_uORF	0.68294
bin7	Longer_uORF	1.05598
bin7	Longer_uORF	0.636888
bin7	Longer_uORF	2.11559
bin7	Longer_uORF	0.389035
bin7	Longer_uORF	3.47345
bin7	Longer_uORF	2.37499
bin7	Longer_uORF	0.428325
bin7	Longer_uORF	0.478155
bin7	Longer_uORF	0.731115
bin7	Longer_uORF	0.530106
bin7	Longer_uORF	0.477772
bin7	Longer_uORF	0.794604
bin7	Longer_uORF	0.455986
bin7	Longer_uORF	0.379087
bin7	Longer_uORF	2.11817
bin7	Longer_uORF	1.16411
bin7	Longer_uORF	0.57623
bin7	Longer_uORF	0.77914
bin7	Longer_uORF	0.409901
bin7	Longer_uORF	0.515184
bin7	Longer_uORF	0.96246
bin7	Longer_uORF	0.778349
bin8	Shorter_uORF	0.452259
bin8	Shorter_uORF	0.514918
bin8	Shorter_uORF	1.10199
bin8	Shorter_uORF	0.432431
bin8	Shorter_uORF	2.16454
bin8	Shorter_uORF	0.530367
bin8	Shorter_uORF	0.660707
bin8	Shorter_uORF	0.652647
bin8	Shorter_uORF	2.91643
bin8	Shorter_uORF	0.752612
bin8	Shorter_uORF	2.88925
bin8	Shorter_uORF	2.6968
bin8	Shorter_uORF	4.42496
bin8	Shorter_uORF	0.462402
bin8	Shorter_uORF	1.09704
bin8	Shorter_uORF	0.786339
bin8	Shorter_uORF	1.90345
bin8	Shorter_uORF	0.52615
bin8	Shorter_uORF	0.668789
bin8	Shorter_uORF	0.662853
bin8	Shorter_uORF	1.77031
bin8	Shorter_uORF	0.521679
bin8	Shorter_uORF	0.544828
bin8	Shorter_uORF	1.56242
bin8	Shorter_uORF	0.756985
bin8	Shorter_uORF	0.632411
bin8	Shorter_uORF	0.802134
bin8	Shorter_uORF	0.527523
bin8	Shorter_uORF	0.417605
bin8	Shorter_uORF	1.10342
bin8	Shorter_uORF	0.648775
bin8	Shorter_uORF	0.391278
bin8	Shorter_uORF	0.969464
bin8	Shorter_uORF	0.587653
bin8	Shorter_uORF	0.462411
bin8	Shorter_uORF	0.68228
bin8	Shorter_uORF	2.03507
bin8	Shorter_uORF	0.474093
bin8	Shorter_uORF	0.760998
bin8	Shorter_uORF	0.719014
bin8	Shorter_uORF	2.60947
bin8	Shorter_uORF	0.533
bin8	Shorter_uORF	1.6879
bin8	Shorter_uORF	2.83594
bin8	Shorter_uORF	0.637038
bin8	Shorter_uORF	1.38889
bin8	Shorter_uORF	2.25129
bin8	Shorter_uORF	0.622442
bin8	Shorter_uORF	0.422358
bin8	Shorter_uORF	0.628306
bin8	Shorter_uORF	0.622635
bin8	Shorter_uORF	0.636827
bin8	Shorter_uORF	0.925788
bin8	Shorter_uORF	0.625813
bin8	Shorter_uORF	1.23586
bin8	Shorter_uORF	0.872143
bin8	Shorter_uORF	0.480845
bin8	Shorter_uORF	0.657099
bin8	Shorter_uORF	0.496291
bin8	Shorter_uORF	0.669538
bin8	Shorter_uORF	1.16256
bin8	Shorter_uORF	1.87463
bin8	Shorter_uORF	0.716986
bin8	Shorter_uORF	0.481829
bin8	Shorter_uORF	0.846824
bin8	Shorter_uORF	0.706817
bin8	Shorter_uORF	0.627324
bin8	Shorter_uORF	0.770937
bin8	Shorter_uORF	2.49913
bin8	Shorter_uORF	0.47256
bin8	Shorter_uORF	0.555883
bin8	Shorter_uORF	0.553079
bin8	Shorter_uORF	0.928008
bin8	Shorter_uORF	1.57133
bin8	Shorter_uORF	0.541637
bin8	Shorter_uORF	0.652685
bin8	Shorter_uORF	0.973614
bin8	Shorter_uORF	0.632258
bin8	Shorter_uORF	0.655572
bin8	Shorter_uORF	1.29336
bin8	Shorter_uORF	0.365822
bin8	Shorter_uORF	2.7162
bin8	Shorter_uORF	0.489185
bin8	Shorter_uORF	0.605638
bin8	Shorter_uORF	0.786009
bin8	Shorter_uORF	0.534493
bin8	Shorter_uORF	1.01557
bin8	Shorter_uORF	2.08184
bin8	Shorter_uORF	1.04864
bin8	Shorter_uORF	2.73779
bin8	Shorter_uORF	0.457043
bin8	Shorter_uORF	0.476582
bin8	Shorter_uORF	1.10097
bin8	Shorter_uORF	1.17869
bin8	Shorter_uORF	0.497133
bin8	Shorter_uORF	0.653523
bin8	Shorter_uORF	0.527255
bin8	Shorter_uORF	1.14218
bin8	Shorter_uORF	0.693039
bin8	Shorter_uORF	3.42613
bin8	Shorter_uORF	0.47035
bin8	Shorter_uORF	0.85184
bin8	Shorter_uORF	0.661071
bin8	Shorter_uORF	0.622926
bin8	Shorter_uORF	0.612679
bin8	Shorter_uORF	1.15571
bin8	Shorter_uORF	2.16176
bin8	Shorter_uORF	2.34561
bin8	Shorter_uORF	0.525441
bin8	Shorter_uORF	0.91945
bin8	Shorter_uORF	0.648298
bin8	Shorter_uORF	0.873286
bin8	Shorter_uORF	0.526397
bin8	Shorter_uORF	0.566472
bin8	Shorter_uORF	0.547322
bin8	Shorter_uORF	0.903237
bin8	Shorter_uORF	2.06659
bin8	Shorter_uORF	0.95012
bin8	Shorter_uORF	0.424427
bin8	Shorter_uORF	0.775543
bin8	Shorter_uORF	2.70129
bin8	Shorter_uORF	1.90831
bin8	Shorter_uORF	2.27746
bin8	Shorter_uORF	0.771905
bin8	Shorter_uORF	0.550617
bin8	Shorter_uORF	0.759748
bin8	Shorter_uORF	0.649235
bin8	Shorter_uORF	2.74245
bin8	Shorter_uORF	2.74245
bin8	Longer_uORF	0.641724
bin8	Longer_uORF	0.539858
bin8	Longer_uORF	0.982269
bin8	Longer_uORF	0.612853
bin8	Longer_uORF	2.24573
bin8	Longer_uORF	1.85215
bin8	Longer_uORF	0.576678
bin8	Longer_uORF	0.589783
bin8	Longer_uORF	0.818579
bin8	Longer_uORF	0.73854
bin8	Longer_uORF	1.74671
bin8	Longer_uORF	0.579844
bin8	Longer_uORF	3.27982
bin8	Longer_uORF	0.52132
bin8	Longer_uORF	0.801068
bin8	Longer_uORF	0.543549
bin8	Longer_uORF	2.39493
bin8	Longer_uORF	0.666413
bin8	Longer_uORF	1.6349
bin8	Longer_uORF	0.491997
bin8	Longer_uORF	1.69122
bin8	Longer_uORF	0.444116
bin8	Longer_uORF	0.685142
bin8	Longer_uORF	0.684129
bin8	Longer_uORF	0.587269
bin8	Longer_uORF	0.724593
bin8	Longer_uORF	0.537306
bin8	Longer_uORF	0.40981
bin8	Longer_uORF	0.923255
bin8	Longer_uORF	0.570737
bin8	Longer_uORF	0.713565
bin8	Longer_uORF	1.04086
bin8	Longer_uORF	0.415606
bin8	Longer_uORF	0.656858
bin8	Longer_uORF	0.714194
bin8	Longer_uORF	0.669237
bin8	Longer_uORF	2.26484
bin8	Longer_uORF	2.69709
bin8	Longer_uORF	0.885426
bin8	Longer_uORF	2.53508
bin8	Longer_uORF	1.04637
bin8	Longer_uORF	2.4117
bin8	Longer_uORF	0.474805
bin8	Longer_uORF	0.991779
bin8	Longer_uORF	1.60779
bin8	Longer_uORF	0.414159
bin8	Longer_uORF	0.550869
bin8	Longer_uORF	0.878849
bin8	Longer_uORF	1.68643
bin8	Longer_uORF	0.404679
bin8	Longer_uORF	1.43525
bin8	Longer_uORF	0.618371
bin8	Longer_uORF	2.52078
bin8	Longer_uORF	0.642375
bin8	Longer_uORF	0.796304
bin8	Longer_uORF	0.813501
bin8	Longer_uORF	0.793328
bin8	Longer_uORF	0.583187
bin8	Longer_uORF	0.435813
bin8	Longer_uORF	0.741018
bin8	Longer_uORF	0.547219
bin8	Longer_uORF	1.13079
bin8	Longer_uORF	1.23263
bin8	Longer_uORF	0.859217
bin8	Longer_uORF	0.765793
bin8	Longer_uORF	0.604096
bin8	Longer_uORF	0.670045
bin8	Longer_uORF	0.647888
bin8	Longer_uORF	0.537813
bin8	Longer_uORF	0.666602
bin8	Longer_uORF	0.432441
bin8	Longer_uORF	0.598251
bin8	Longer_uORF	2.53758
bin8	Longer_uORF	0.4991
bin8	Longer_uORF	0.775567
bin8	Longer_uORF	0.614006
bin8	Longer_uORF	0.642213
bin8	Longer_uORF	3.25285
bin8	Longer_uORF	1.12984
bin8	Longer_uORF	0.381327
[truncated: 3,117 more rows]
