# Supplementary material for: Upstream open reading frames buffer translational variability during Drosophila evolution and development
Source: eLife. 2025 Jun 6;14:RP104074. doi: 10.7554/eLife.104074 (PMC12143884; doi:10.7554/eLife.104074)
Supplement: Figure 8—source data 1. [file elife-104074-fig8-data1.xlsx]

## Sheet: Fig8A
uORF_id_mac	uORF_id_pt	uORF_id_hs	chr_pos_hs	uORF_len.x	hs_18505_TE	hs_18507_TE	hs_18516_TE	hs_19193_TE	hs_19204_TE	hs_19238_TE	hs_total_TE	hs_TE_cv	tx_name_hs	tx_pos_hs	hs_total_TE_rank	order_hs	order_rev_hs	uORF_len.y	pt_18358_TE	pt_18359_TE	pt_3659_TE	pt_4973_TE	pt_91_TE	pt_total_TE	pt_TE_cv	tx_name_pt	tx_pos_pt	pt_total_TE_rank	order_pt	order_rev_pt	uORF_len	mac_15099_TE	mac_18196_TE	mac_24997_TE	mac_26595_TE	mac_29096_TE	mac_total_TE	mac_TE_cv	tx_name_mac	tx_pos_mac	mac_total_TE_rank	order_mac	order_rev_mac	pt_cons	mac_cons
ENSMMUT00000025963_66	ENSPTRT00000005394_47	ENST00000421367_54	chr10:100185976:-	12	0.748466	0	0	1.18027	4.91564	0.366818	0.814138	1.56035	ENST00000421367	54	2	1	2	12	0	0	3.3696	0	0	0.343716	2.23607	ENSPTRT00000005394	47	1	1	1	3	0	0	0	0	0	0	0	ENSMMUT00000025963	66	34	1	37	TRUE	TRUE
ENSMMUT00000018822_585	ENSPTRT00000100697_1103	ENST00000370269_6	chr10:100912984:+	127	9.57466	1.7658	0	7.88783	14.0736	11.1701	6.08367	0.739512	ENST00000370269	6	2	1	2	127	4.1608	13.2768	6.04238	1.15595	9.68915	6.65957	0.689687	ENSPTRT00000100697	1103	2	18	2	127	3.8839	10.5116	10.0354	22.8363	23.1204	13.4859	0.606358	ENSMMUT00000018822	585	2	10	2	TRUE	TRUE
ENSMMUT00000018822_686	ENSPTRT00000100697_1204	ENST00000370269_107	chr10:100913085:+	26	6902.78	1.10141	0	10.5941	6.88021	9.82091	6.17998	2.43745	ENST00000370269	107	1	2	1	26	3.9784	13.6612	7.76532	0.813305	24.2607	8.42336	0.916391	ENSPTRT00000100697	1204	1	19	1	26	4.53573	24.2289	15.0964	14822.8	24.0766	28.4861	2.22332	ENSMMUT00000018822	686	1	11	1	TRUE	TRUE
ENSMMUT00000054565_422	ENSPTRT00000079741_863	ENST00000224807_388	chr10:101032405:+	54	145.482	0	0	178.552	116.622	0	1.30342	1.12748	ENST00000224807	388	1	1	1	54	0	0	0	0	0	0	0	ENSPTRT00000079741	863	0	10	1	54	113.424	0	0	0	0	1.45746	2.23607	ENSMMUT00000054565	422	1	1	1	TRUE	TRUE
ENSMMUT00000063451_30	ENSPTRT00000043503_25	ENST00000405356_30	chr10:102152205:+	162	0	1.99005	0	0	0	2.53805	1.21391	1.56612	ENST00000405356	30	2	1	3	123	0	0	0	0	0	0	0	ENSPTRT00000043503	25	0	1	3	123	0	0	44.4571	0	0	9.72719	2.23607	ENSMMUT00000063451	30	1	1	3	TRUE	TRUE
ENSMMUT00000063451_131	ENSPTRT00000043503_126	ENST00000405356_130	chr10:102152305:+	27	0	410.777	0	0	0	5.09428	4.48281	2.41366	ENST00000405356	130	1	2	2	27	0	0	0	0	0	0	0	ENSPTRT00000043503	126	0	2	2	108	0.106139	0.150766	0	0	0	0.0541451	1.40332	ENSMMUT00000063451	131	2	2	2	TRUE	TRUE
ENSMMUT00000063451_149	ENSPTRT00000043503_144	ENST00000405356_148	chr10:102152323:+	9	0	0	0	0	0	0	0	0	ENST00000405356	148	3	3	1	9	0	0	0	0	0	0	0	ENSPTRT00000043503	144	0	3	1	90	0.106083	0.150729	0	0	0	0.0540949	1.40337	ENSMMUT00000063451	149	3	3	1	TRUE	TRUE
ENSMMUT00000004232_518	ENSPTRT00000005500_228	ENST00000369983_194	chr10:102245725:+	30	0.374988	1.28488	0	22.8991	34.3038	6.22254	4.5431	1.32673	ENST00000369983	194	1	1	1	30	1.82074	3.39801	8.1732	0.917372	9.24893	3.68219	0.801531	ENSPTRT00000005500	228	1	1	1	30	1.06151	3.98786	1.44876	2.26992	1.68177	2.27838	0.549201	ENSMMUT00000004232	518	1	6	1	TRUE	TRUE
ENSMMUT00000004243_256	ENSPTRT00000045758_274	ENST00000406432_136	chr10:102417106:-	54	0	0	0	0	0	0	0	0	ENST00000406432	136	0	1	1	318	0	0	0	0	0	0	0	ENSPTRT00000045758	274	0	3	1	54	0	0	0	0	0	0	0	ENSMMUT00000004243	256	0	2	1	TRUE	TRUE
ENSMMUT00000066541_235	ENSPTRT00000005513_523	ENST00000238936_171	chr10:102468963:+	51	1.12137	0	0	0	0	1076.3	2.02608	2.44643	ENST00000238936	171	1	1	2	51	0	2.96907	13.307	985.299	0	3.73474	2.19082	ENSPTRT00000005513	523	2	6	2	51	1.81926	6.85851	1.22042	1.68147	4.9582	3.47638	0.748996	ENSMMUT00000066541	235	1	4	2	TRUE	TRUE
ENSMMUT00000066541_256	ENSPTRT00000005513_544	ENST00000238936_192	chr10:102468984:+	30	1.12174	0	0	0	0	784.435	1.01739	2.44529	ENST00000238936	192	2	2	1	30	0	2.97017	13.3839	1674.31	0	3.73903	2.20909	ENSPTRT00000005513	544	1	7	1	30	1.21311	5.42409	0.879682	1.7439	3.46273	2.69098	0.74355	ENSMMUT00000066541	256	2	5	1	TRUE	TRUE
ENSMMUT00000009859_1031	ENSPTRT00000005544_1193	ENST00000260743_405	chr10:103451096:-	45	0.561417	0	0	0.443856	0	0.780866	0.413913	1.15415	ENST00000260743	405	2	3	1	36	0	0	0	0	0	0	0	ENSPTRT00000005544	1193	13	10	13	87	0	0	0	0	0	0	0	ENSMMUT00000009859	1031	0	13	11	TRUE	TRUE
ENSMMUT00000009859_887	ENSPTRT00000005544_1050	ENST00000260743_262	chr10:103451239:-	21	0	0	0	0	0	0.367085	0.171551	2.44949	ENST00000260743	262	3	2	2	21	0	0	0	0	0	0	0	ENSPTRT00000005544	1050	12	9	14	21	0	0	0	0	0	0	0	ENSMMUT00000009859	887	0	12	12	TRUE	TRUE
ENSMMUT00000021485_103	ENSPTRT00000005552_434	ENST00000224950_101	chr10:103917641:-	47	1.45198	0.769362	0	2.08219	1.45522	0.991119	1.20178	0.633835	ENST00000224950	101	2	2	1	47	1.26662	0	0.664621	1.03484	0	0.564079	0.982004	ENSPTRT00000005552	434	5	6	1	47	0.568879	1.48794	4.93839	0	0.647106	1.47466	1.29465	ENSMMUT00000021485	103	2	2	1	TRUE	TRUE
ENSMMUT00000021485_88	ENSPTRT00000005552_419	ENST00000224950_86	chr10:103917656:-	62	1.23428	0.878029	0	2.49794	1.65363	1.30978	1.38397	0.655587	ENST00000224950	86	1	1	2	62	1.93689	0	0.800923	0.98986	0	0.677739	1.0801	ENSPTRT00000005552	419	4	5	2	62	0.622749	2.31077	4.55821	0	0.630973	1.61914	1.1395	ENSMMUT00000021485	88	1	1	2	TRUE	TRUE
ENSMMUT00000062446_439	ENSPTRT00000100236_1433	ENST00000338595_118	chr10:104274716:+	27	0	0	0	0	0	0	0	0	ENST00000338595	118	0	1	1	27	6.99976	0	4.08726	4.3303	0	2.31827	0.98522	ENSPTRT00000100236	1433	1	18	1	27	0	0	0	0	3290.93	3.15992	2.23607	ENSMMUT00000062446	439	1	1	1	TRUE	TRUE
ENSMMUT00000024187_9	ENSPTRT00000005608_305	ENST00000369452_120	chr10:110964133:+	12	0.0899069	0	0	0	1.18146	0.202601	0.141414	1.89439	ENST00000369452	120	10	2	9	12	0	0	0.281227	0.378625	3.92384	0.39406	1.84289	ENSPTRT00000005608	305	11	7	9	12	0.535335	0	0	0	0.909717	0.303513	1.44387	ENSMMUT00000024187	9	3	1	8	TRUE	TRUE
ENSMMUT00000024187_48	ENSPTRT00000005608_344	ENST00000369452_159	chr10:110964172:+	24	2.43116	0.266356	2.7488	3.35411	4.19939	0.969096	1.51296	0.63243	ENST00000369452	159	4	3	8	24	0.66424	0	1.1246	1.8429	1.19685	0.86974	0.708317	ENSPTRT00000005608	344	9	8	8	24	0.496639	0	0	0	0	0.0425216	2.23607	ENSMMUT00000024187	48	6	2	7	TRUE	TRUE
ENSMMUT00000024187_62	ENSPTRT00000005608_358	ENST00000369452_173	chr10:110964186:+	84	5.2344	1.89174	6.00867	4.83623	5.18654	2.14271	3.21246	0.414549	ENST00000369452	173	2	5	6	84	0.449127	0.519234	1.64058	1.99143	1.64542	1.10272	0.570864	ENSPTRT00000005608	358	8	10	6	84	1.48837	1.22932	0.527188	0.680965	0	0.69402	0.749612	ENSMMUT00000024187	62	1	3	6	TRUE	TRUE
ENSMMUT00000024187_88	ENSPTRT00000005608_384	ENST00000369452_199	chr10:110964212:+	6	0	0.586271	0	0	0	0.855092	0.308929	1.58909	ENST00000369452	199	9	6	5	6	0.890367	0	0.890334	0.559579	0.856974	0.471104	0.599838	ENSPTRT00000005608	384	10	11	5	6	0	0.0665618	0	0	0	0.0187496	2.23607	ENSMMUT00000024187	88	7	4	5	TRUE	TRUE
ENSMMUT00000024187_97	ENSPTRT00000005608_393	ENST00000369452_208	chr10:110964221:+	21	1.02874	0	0	0.186732	2.42293	0.554729	0.575426	1.3333	ENST00000369452	208	7	7	4	21	0	0	0.581792	0.650527	1.01277	0.316992	0.983003	ENSPTRT00000005608	393	12	12	4	21	0.485497	1.32971	0	0	0	0.37011	1.59716	ENSMMUT00000024187	97	2	5	4	TRUE	TRUE
ENSMMUT00000024187_101	ENSPTRT00000005608_397	ENST00000369452_212	chr10:110964225:+	45	0.85144	0.542618	0.777396	0.644197	1.85267	0.979461	0.868421	0.501501	ENST00000369452	212	6	8	3	45	0	0	0.301958	0.533296	0.779136	0.225609	1.05187	ENSPTRT00000005608	397	14	13	3	45	1.07042	0	0	0.985934	0	0.252031	1.37123	ENSMMUT00000024187	101	4	6	3	TRUE	TRUE
ENSMMUT00000024187_111	ENSPTRT00000005608_407	ENST00000369452_222	chr10:110964235:+	66	1.91394	0.472216	0.553524	1.18035	1.23046	0.884609	0.922608	0.50973	ENST00000369452	222	5	9	2	66	0.596202	0	0.225204	0.698368	0	0.230984	1.08113	ENSPTRT00000005608	407	13	14	2	66	0.60689	0	0	0.752556	0	0.186832	1.38235	ENSMMUT00000024187	111	5	7	2	TRUE	TRUE
ENSMMUT00000024187_206	ENSPTRT00000005608_502	ENST00000369452_317	chr10:110964330:+	6	0	0	0	0	3.54411	0.346689	0.328105	2.198	ENST00000369452	317	8	10	1	6	0	0	0.287724	0.495631	0	0.163366	1.44746	ENSPTRT00000005608	502	15	15	1	6	0	0	0	0	0	0	0	ENSMMUT00000024187	206	8	8	1	TRUE	TRUE
ENSMMUT00000010528_352	ENSPTRT00000005611_378	ENST00000348367_175	chr10:112181810:-	26	0	0	0	0	0	0	0	0	ENST00000348367	175	4	4	1	26	0	0	0	0	0	0	0	ENSPTRT00000005611	378	6	8	1	26	0	0	0	0	0	0	0	ENSMMUT00000010528	352	4	4	1	TRUE	TRUE
ENSMMUT00000010528_323	ENSPTRT00000005611_349	ENST00000348367_146	chr10:112182819:-	33	0	0	0	291.54	0	0	0.386714	2.44949	ENST00000348367	146	2	3	2	33	0	0	0	0	0	0	0	ENSPTRT00000005611	349	5	7	2	33	0	0	0	0	0	0	0	ENSMMUT00000010528	323	3	3	2	TRUE	TRUE
ENSMMUT00000010528_318	ENSPTRT00000005611_344	ENST00000348367_141	chr10:112182824:-	9	0	0	0	0	0	0	0	0	ENST00000348367	141	3	2	3	9	0	0	2.24756	0	3.60019	1.66408	1.42906	ENSPTRT00000005611	344	1	6	3	9	0	0	0	0	0	0	0	ENSMMUT00000010528	318	2	2	3	TRUE	TRUE
ENSMMUT00000010528_273	ENSPTRT00000005611_299	ENST00000348367_96	chr10:112182869:-	39	0	0	0	246.842	0	0	2.90127	2.44949	ENST00000348367	96	1	1	4	39	0	0	0.377305	0	0	0.0787616	2.23607	ENSPTRT00000005611	299	4	5	4	39	1401.97	0	0	0	0	1.34076	2.23607	ENSMMUT00000010528	273	1	1	4	TRUE	TRUE
ENSMMUT00000001628_544	ENSPTRT00000049264_538	ENST00000356116_45	chr10:112376242:+	9	16.0641	10.0119	3.26426	37.6144	8.94894	6.72463	10.7364	0.901818	ENST00000356116	45	1	1	1	9	0	3.76614	3.78214	6.71981	0	2.44867	1.00545	ENSPTRT00000049264	538	1	3	1	9	0.837119	1.32976	0.703346	0.815463	1.59841	1.12234	0.366257	ENSMMUT00000001628	544	1	4	3	TRUE	TRUE
ENSMMUT00000078268_398	ENSPTRT00000005617_400	ENST00000369405_360	chr10:112445501:-	65	0	0.539216	0	0.296541	3.05854	2.56247	0.912707	1.27083	ENST00000369405	360	6	8	1	65	0	0	0.947105	1.13561	0	0.537893	1.37862	ENSPTRT00000005617	400	5	8	1	65	0.182777	1.04978	0	0	0	0.23118	1.84966	ENSMMUT00000078268	398	7	8	1	TRUE	TRUE
ENSMMUT00000078268_392	ENSPTRT00000005617_394	ENST00000369405_354	chr10:112445507:-	71	0	0.505633	0	1.32757	1.83669	2.56245	0.937235	1.00824	ENST00000369405	354	5	7	2	71	1.16722	0	1.08439	1.41364	0	0.768052	0.927699	ENSPTRT00000005617	394	4	7	2	71	0.146311	2.26467	0	0	0	0.534714	2.07062	ENSMMUT00000078268	392	6	7	2	TRUE	TRUE
ENSMMUT00000078268_377	ENSPTRT00000005617_379	ENST00000369405_339	chr10:112445522:-	86	0	0.42607	0	1.45745	2.95052	2.21388	1.1336	1.05189	ENST00000369405	339	3	6	3	86	3.31591	0.451393	1.26499	1.20436	0.877845	1.29717	0.777616	ENSPTRT00000005617	379	2	6	3	86	0.312473	1.73563	0.672062	0	0	0.583658	1.32608	ENSMMUT00000078268	377	5	6	3	TRUE	TRUE
ENSMMUT00000078268_357	ENSPTRT00000005617_359	ENST00000369405_319	chr10:112445542:-	84	0	0.253132	0	1.99023	2.24896	2.11778	1.01746	1.01773	ENST00000369405	319	4	5	4	78	4.19998	0.442052	1.19065	0.3219	0.693143	1.16402	1.18068	ENSPTRT00000005617	359	3	5	4	78	0.7722	2.19167	1.25958	0	0	0.88379	1.09448	ENSMMUT00000078268	357	4	5	4	TRUE	TRUE
ENSMMUT00000078268_320	ENSPTRT00000005617_321	ENST00000369405_281	chr10:112445580:-	9	1.41754	0.336645	0	0.322169	0	0.32078	0.546315	1.31102	ENST00000369405	281	8	4	5	9	0	0	0	0	0	0	0	ENSPTRT00000005617	321	8	4	5	9	0.909926	0	0	0	0	0.0698184	2.23607	ENSMMUT00000078268	320	8	4	5	TRUE	TRUE
ENSMMUT00000078268_215	ENSPTRT00000005617_216	ENST00000369405_176	chr10:112446739:-	114	0.379644	0.571303	2.02881	0.8688	1.80994	1.59082	1.17071	0.572134	ENST00000369405	176	2	3	6	114	0	0	0.351722	0.907684	0.280394	0.326009	1.2063	ENSPTRT00000005617	216	7	3	6	114	1.47298	0.512523	2.01886	2.00959	0	1.04853	0.756651	ENSMMUT00000078268	215	3	3	6	TRUE	TRUE
ENSMMUT00000078268_210	ENSPTRT00000005617_211	ENST00000369405_171	chr10:112446744:-	39	0.166608	0.785379	1.83601	0.708531	0.0900187	1.96129	0.874737	0.870934	ENST00000369405	171	7	2	7	39	0	0	0.45001	0.241201	0.766499	0.338566	1.11572	ENSPTRT00000005617	211	6	2	7	39	1.03285	1.23905	2.37075	2.47558	0.172801	1.36196	0.663909	ENSMMUT00000078268	210	2	2	7	TRUE	TRUE
ENSMMUT00000078268_150	ENSPTRT00000005617_151	ENST00000369405_111	chr10:112446804:-	42	1.45218	8.07279	1.74873	5.42589	4.0519	4.36869	3.3336	0.586135	ENST00000369405	111	1	1	8	42	1.51732	1.11255	10.9437	5.21268	2.21772	4.54226	0.975435	ENSPTRT00000005617	151	1	1	8	42	2.50686	0.769935	2.46192	7.73358	3.72983	3.12696	0.761781	ENSMMUT00000078268	150	1	1	8	TRUE	TRUE
ENSMMUT00000023393_646	ENSPTRT00000050373_714	ENST00000361384_882	chr10:113853201:-	19	0	0	0	0	0	0	0	0	ENST00000361384	882	16	16	1	19	0	0	0	0	0	0	0	ENSPTRT00000050373	714	12	12	1	19	0	0	0	0	0	0	0	ENSMMUT00000023393	646	12	12	1	TRUE	TRUE
ENSMMUT00000023393_609	ENSPTRT00000050373_677	ENST00000361384_845	chr10:113853238:-	21	0	0	0	0.885623	0	0	0.114458	2.44949	ENST00000361384	845	9	15	2	21	0	0	0	0	0	0	0	ENSPTRT00000050373	677	11	11	2	21	0	0	0	0	0	0	0	ENSMMUT00000023393	609	11	11	2	TRUE	TRUE
ENSMMUT00000023393_510	ENSPTRT00000050373_566	ENST00000361384_738	chr10:113853345:-	33	15.5734	0	0	3.52621	0	1.53798	1.10976	1.77487	ENST00000361384	738	7	14	3	33	0	3.08664	0	0	0	0.499979	2.23607	ENSPTRT00000050373	566	2	10	3	33	0.261016	0	2.15491	8.55495	0	2.34298	1.67185	ENSMMUT00000023393	510	1	10	3	TRUE	TRUE
ENSMMUT00000023393_464	ENSPTRT00000050373_520	ENST00000361384_692	chr10:113853391:-	9	0	0	0	0	0	0	0	0	ENST00000361384	692	15	13	4	9	0	0	0	0	0	0	0	ENSPTRT00000050373	520	10	9	4	129	0.130786	0	0.718804	2.85175	0	0.727777	1.64427	ENSMMUT00000023393	464	4	9	4	TRUE	TRUE
ENSMMUT00000023393_403	ENSPTRT00000050373_459	ENST00000361384_631	chr10:113853452:-	45	0	0	0	0	0	0.367129	0.237494	2.44949	ENST00000361384	631	8	12	5	45	0	0	0.225622	1.37926	0	0.327853	1.86809	ENSPTRT00000050373	459	3	8	5	45	0	1.95489	1.02394	0	0	0.656601	1.47656	ENSMMUT00000023393	403	5	7	6	TRUE	TRUE
ENSMMUT00000023393_351	ENSPTRT00000050373_407	ENST00000361384_579	chr10:113853504:-	39	0	0	0	0	0	0	0	0	ENST00000361384	579	13	10	7	39	0	0	0	0	0	0	0	ENSPTRT00000050373	407	8	6	7	150	0	0.87498	0.726966	0	0	0.408459	1.37901	ENSMMUT00000023393	351	8	6	7	TRUE	TRUE
ENSMMUT00000023393_266	ENSPTRT00000050373_328	ENST00000361384_500	chr10:113853583:-	21	0	0	0	0.443241	0	0	0.0562338	2.44949	ENST00000361384	500	11	9	8	21	0	0	0	0	0	0	0	ENSPTRT00000050373	328	7	5	8	21	0	1.08041	0	0	0	0.451378	2.23607	ENSMMUT00000023393	266	7	5	8	TRUE	TRUE
ENSMMUT00000023393_213	ENSPTRT00000050373_274	ENST00000361384_446	chr10:113853637:-	75	0	0	0	0.444624	0	0.12318	0.0843906	1.88514	ENST00000361384	446	10	8	9	75	0	0	0	0	0	0	0	ENSPTRT00000050373	274	6	4	9	51	0	0	0	0	6.07811	1.27383	2.23607	ENSMMUT00000023393	213	2	4	9	TRUE	TRUE
ENSMMUT00000023393_121	ENSPTRT00000050373_191	ENST00000361384_363	chr10:113853720:-	9	0	0.73438	0	0	7632.07	0.427821	1.52588	2.44904	ENST00000361384	363	6	7	10	9	0	0	0	0	0	0	0	ENSPTRT00000050373	191	5	3	10	9	0.47897	0	2.20153	0	0	0.373056	1.77919	ENSMMUT00000023393	121	9	3	10	TRUE	TRUE
ENSMMUT00000023393_30	ENSPTRT00000050373_93	ENST00000361384_265	chr10:113853818:-	42	8.94612	5.82539	29.784	5.29575	4.41942	0.855301	6.34655	1.13413	ENST00000361384	265	1	5	12	42	0	0.1113	0	2.8161	0	0.583243	2.13139	ENSPTRT00000050373	93	1	1	12	45	2.90654	0.0406378	2.18793	0	2.5435	1.0397	0.915907	ENSMMUT00000023393	30	3	1	12	TRUE	TRUE
ENSMMUT00000031677_760	ENSPTRT00000005645_332	ENST00000648613_344	chr10:114163329:-	6	0	0	0	0	0	0	0	0	ENST00000648613	344	3	3	1	6	0	0	0	2.43891	0	0.633942	2.23607	ENSPTRT00000005645	332	3	3	1	6	0.455196	0	0	0	0	0.0483781	2.23607	ENSMMUT00000031677	760	1	12	1	TRUE	TRUE
ENSMMUT00000002689_28	ENSPTRT00000005657_47	ENST00000298746_34	chr10:114938228:+	26	0	0	0	1.76896	0	2.56081	0.449748	1.58758	ENST00000298746	34	1	1	1	26	0	0	2.6199	0.722959	0	0.530552	1.69744	ENSPTRT00000005657	47	1	1	1	26	14.4536	0	0	0	0	0.628827	2.23607	ENSMMUT00000002689	28	1	1	1	TRUE	TRUE
ENSMMUT00000067660_97	ENSPTRT00000100941_10	ENST00000369183_65	chr10:118341918:-	21	2.41653	0	0	0	0	0.513215	0.590985	1.97974	ENST00000369183	65	3	3	2	21	0	0	0.529409	0.271197	5.23043	0.757123	1.87392	ENSPTRT00000100941	10	2	1	4	21	0	0	0	0.0582159	0	0.01152	2.23607	ENSMMUT00000067660	97	4	4	1	TRUE	TRUE
ENSMMUT00000033245_212	ENSPTRT00000100393_741	ENST00000277570_136	chr10:11852017:+	33	0	0	0	0	0	0	0	0	ENST00000277570	136	0	1	1	33	3.76899	1.08168	1.56167	0	0	1.4452	1.20738	ENSPTRT00000100393	741	1	8	1	33	0	0.700017	0	0	0	0.237347	2.23607	ENSMMUT00000033245	212	2	1	2	TRUE	TRUE
ENSMMUT00000022980_374	ENSPTRT00000005688_766	ENST00000369151_117	chr10:118754854:-	6	90.826	5.38327	97.7237	103869	21.6224	67.9131	59.2091	2.44149	ENST00000369151	117	1	1	1	6	29.1641	40.6656	43.4599	30.2948	137.489	50.2246	0.815849	ENSPTRT00000005688	766	1	5	1	6	2.0795	51.1137	110.61	20.1784	44.2162	40.2683	0.903331	ENSMMUT00000022980	374	1	2	1	TRUE	TRUE
ENSMMUT00000018301_307	ENSPTRT00000005749_229	ENST00000392799_1450	chr10:122393185:+	16	0	0	0	0	0	0	0	0	ENST00000392799	1450	0	18	1	16	0	0	1639.58	0	0	2.55517	2.23607	ENSPTRT00000005749	229	1	1	1	16	0	0	0	0	0	0	0	ENSMMUT00000018301	307	0	2	1	TRUE	TRUE
ENSMMUT00000033033_106	ENSPTRT00000005760_263	ENST00000368886_230	chr10:123007071:-	42	0	0	0	0	0	0.641721	0.142013	2.44949	ENST00000368886	230	5	5	2	42	0	0	0.605948	3.24695	0	0.666339	1.82847	ENSPTRT00000005760	263	4	5	2	42	0	0	0	0	0	0	0	ENSMMUT00000033033	106	3	3	1	TRUE	TRUE
ENSMMUT00000033033_43	ENSPTRT00000005760_200	ENST00000368886_167	chr10:123007134:-	105	1.79085	0	0	0.591588	0.716932	1.35735	0.631255	0.971399	ENST00000368886	167	4	4	3	105	0	0	0.464074	3.60326	0	0.611349	1.933	ENSPTRT00000005760	200	5	4	3	105	0.420656	0	0	0	0	0.0693627	2.23607	ENSMMUT00000033033	43	2	2	2	TRUE	TRUE
ENSMMUT00000033033_9	ENSPTRT00000005760_166	ENST00000368886_133	chr10:123007168:-	18	0	0	4.07827	21.1159	31.3353	1.53851	3.97671	1.37452	ENST00000368886	133	3	3	4	18	0	10.0164	0	0	0	1.25239	2.23607	ENSPTRT00000005760	166	2	3	4	18	0.909951	0	0	0	1.54599	0.64873	1.44381	ENSMMUT00000033033	9	1	1	3	TRUE	TRUE
ENSMMUT00000014120_4743	ENSPTRT00000044068_4784	ENST00000346248_604	chr10:124046252:-	12	0	0	0	0	0	0	0	0	ENST00000346248	604	10	10	1	12	0	0	0	0	36.3312	32.3372	2.23607	ENSPTRT00000044068	4784	1	92	1	12	0	0	0	0	0	0	0	ENSMMUT00000014120	4743	88	94	1	TRUE	TRUE
ENSMMUT00000014120_4600	ENSPTRT00000044068_4644	ENST00000346248_464	chr10:124046392:-	21	0	0	0	0	0	2.55455	1.5152	2.44949	ENST00000346248	464	3	9	2	21	0	0	0	0	0	0	0	ENSPTRT00000044068	4644	85	91	2	21	0	0	0	0	0	0	0	ENSMMUT00000014120	4600	86	92	3	TRUE	TRUE
ENSMMUT00000014120_4548	ENSPTRT00000044068_4592	ENST00000346248_412	chr10:124046444:-	126	0	0	0	0	0	0.644972	0.293983	2.44949	ENST00000346248	412	4	8	3	126	0	0	0	0	1.39163	0.776436	2.23607	ENSPTRT00000044068	4592	4	90	3	126	0	445.575	0	0	0	14.1134	2.23607	ENSMMUT00000014120	4548	1	91	4	TRUE	TRUE
ENSMMUT00000014120_4469	ENSPTRT00000044068_4513	ENST00000346248_333	chr10:124046523:-	15	0	0	0	0	0	0	0	0	ENST00000346248	333	9	7	4	15	0	0	0	0	6.06896	1.64629	2.23607	ENSPTRT00000044068	4513	2	89	4	15	0	0	0	0	0	0	0	ENSMMUT00000014120	4469	85	90	5	TRUE	TRUE
ENSMMUT00000014120_4400	ENSPTRT00000044068_4444	ENST00000346248_264	chr10:124046592:-	84	0	0	0	0	0	0	0	0	ENST00000346248	264	8	6	5	84	0	0	0	0	4.53496	1.26478	2.23607	ENSPTRT00000044068	4444	3	88	5	84	0	0	0	0	0	0	0	ENSMMUT00000014120	4400	83	89	6	TRUE	TRUE
ENSMMUT00000014120_4371	ENSPTRT00000044068_4415	ENST00000346248_235	chr10:124046621:-	33	0	0	0	0	0	0	0	0	ENST00000346248	235	6	4	7	33	0	0	0	0	0	0	0	ENSPTRT00000044068	4415	83	86	7	33	0	0	0	0	0	0	0	ENSMMUT00000014120	4371	82	88	7	TRUE	TRUE
ENSMMUT00000014120_4366	ENSPTRT00000044068_4410	ENST00000346248_230	chr10:124046626:-	27	0	0	0	0	0	291.161	56.4514	2.44949	ENST00000346248	230	2	3	8	27	0	0	0	0	0	0	0	ENSPTRT00000044068	4410	82	85	8	27	0	0	0	0	0	0	0	ENSMMUT00000014120	4366	81	87	8	TRUE	TRUE
ENSMMUT00000014120_4354	ENSPTRT00000044068_4398	ENST00000346248_218	chr10:124046638:-	39	0	0	0	0	0	402.762	77.7788	2.44949	ENST00000346248	218	1	2	9	39	0	0	0	0	0	0	0	ENSPTRT00000044068	4398	81	84	9	39	0	0	0	0	0	0	0	ENSMMUT00000014120	4354	80	86	9	TRUE	TRUE
ENSMMUT00000014120_4330	ENSPTRT00000044068_4374	ENST00000346248_194	chr10:124046662:-	6	0	0	0	0	0	0	0	0	ENST00000346248	194	5	1	10	6	0	0	0	0	0	0	0	ENSPTRT00000044068	4374	80	83	10	6	0	0	0	0	0	0	0	ENSMMUT00000014120	4330	79	85	10	TRUE	TRUE
ENSMMUT00000011950_384	ENSPTRT00000005796_482	ENST00000284690_460	chr10:125880856:-	15	4.4853	0	0	1279.38	0	1.46553	1.64287	2.43589	ENST00000284690	460	3	7	1	15	0	0	0	0.667288	0	0.122428	2.23607	ENSPTRT00000005796	482	4	4	1	15	0.455563	0	0	0	0	0.0719587	2.23607	ENSMMUT00000011950	384	2	3	1	TRUE	TRUE
ENSMMUT00000011950_360	ENSPTRT00000005796_349	ENST00000284690_327	chr10:125880989:-	12	0	0	0	0	3.44382	0.197569	0.53111	2.29371	ENST00000284690	327	4	5	3	12	0	0	0	3.09627	0	0.295545	2.23607	ENSPTRT00000005796	349	3	2	3	39	0.122005	0	0	0	0	0.022388	2.23607	ENSMMUT00000011950	360	3	2	2	TRUE	TRUE
ENSMMUT00000011950_300	ENSPTRT00000005796_292	ENST00000284690_270	chr10:125881046:-	39	5.44388	0.21315	3.04505	48.8925	15.6636	2.09756	3.54826	1.48224	ENST00000284690	270	2	4	4	39	2.69211	4.24412	4.86582	4.33202	5.56351	4.06447	0.244371	ENSPTRT00000005796	292	1	1	4	42	1.81723	0	0	0	0	0.133727	2.23607	ENSMMUT00000011950	300	1	1	3	TRUE	TRUE
ENSMMUT00000031461_517	ENSPTRT00000005846_582	ENST00000368613_279	chr10:132333497:+	28	836.93	0	0	343.422	0	0	2.02521	1.74049	ENST00000368613	279	1	4	1	28	0	0	0.450772	1.35473	0	0.44285	1.63044	ENSPTRT00000005846	582	3	8	1	28	0	0	2.36841	0	0	0.746715	2.23607	ENSMMUT00000031461	517	1	5	1	TRUE	TRUE
ENSMMUT00000024142_61	ENSPTRT00000004238_121	ENST00000378372_21	chr10:14838326:+	24	15.2431	6.91601	104.008	16.4817	7805.5	16.9056	21.4604	2.39076	ENST00000378372	21	1	1	1	24	3.88848	30.8236	29.1725	2.47626	6.07138	11.1615	0.98229	ENSPTRT00000004238	121	1	1	1	24	6.35968	36.5131	0	6.24116	28.8955	13.5883	1.02875	ENSMMUT00000024142	61	1	1	1	TRUE	TRUE
ENSMMUT00000007163_202	ENSPTRT00000043990_203	ENST00000376142_56	chr10:26860880:-	17	0.716369	0	0	0.590482	0.770617	0.290479	0.367294	0.881801	ENST00000376142	56	1	1	1	17	0	0	0	0.29312	0	0.045454	2.23607	ENSPTRT00000043990	203	1	1	1	17	0.520119	0	0	0	0	0.0788014	2.23607	ENSMMUT00000007163	202	1	1	1	TRUE	TRUE
ENSMMUT00000060637_1482	ENSPTRT00000004410_481	ENST00000263056_318	chr10:30437298:+	72	0.4394	0	1.11293	0.625185	1.53826	0.521935	0.773376	0.767226	ENST00000263056	318	2	2	5	348	0.37027	0.157128	0.147979	0.564793	3.82052	0.560137	1.56037	ENSPTRT00000004410	481	2	3	5	72	0	0	0	0	0	0	0	ENSMMUT00000060637	1482	11	19	5	TRUE	TRUE
ENSMMUT00000060637_1503	ENSPTRT00000004410_502	ENST00000263056_339	chr10:30437319:+	51	0.546147	0	0	0.29541	1.75491	0.523681	0.640636	1.25125	ENST00000263056	339	3	3	4	51	0.451103	0.175457	0.0504647	0.101217	0.607787	0.205204	0.869271	ENSPTRT00000004410	502	6	4	4	51	0	0	0	0	0	0	0	ENSMMUT00000060637	1503	12	20	4	TRUE	TRUE
ENSMMUT00000060637_1522	ENSPTRT00000004410_521	ENST00000263056_358	chr10:30437338:+	21	0.878327	0	0	0.122359	1.01856	0.160508	0.410156	1.26606	ENST00000263056	358	4	4	3	21	0	0	0.0625337	0	0.844007	0.104855	2.04871	ENSPTRT00000004410	521	7	5	3	21	0	0	0	0	0	0	0	ENSMMUT00000060637	1522	13	21	3	TRUE	TRUE
ENSMMUT00000060637_1550	ENSPTRT00000004410_549	ENST00000263056_386	chr10:30437366:+	64	0	0.523735	0	0.432231	0.148782	0.213999	0.215355	0.995152	ENST00000263056	386	5	5	2	64	0.195883	0.161722	0.132407	0.943843	0	0.246667	1.30674	ENSPTRT00000004410	549	3	6	2	64	0.127352	0	0	0	0	0.0300107	2.23607	ENSMMUT00000060637	1550	2	22	2	TRUE	TRUE
ENSMMUT00000060637_1586	ENSPTRT00000004410_585	ENST00000263056_422	chr10:30437402:+	28	0	0.642596	0	0.492036	0	0.0886006	0.145521	1.41056	ENST00000263056	422	6	6	1	28	0.278991	0	0.0662202	1.05315	0	0.210542	1.59932	ENSPTRT00000004410	585	4	7	1	28	0.147745	0	0	0	0	0.033932	2.23607	ENSMMUT00000060637	1586	1	23	1	TRUE	TRUE
ENSMMUT00000015811_246	ENSPTRT00000042936_248	ENST00000302418_238	chr10:32056188:-	15	10403.7	1.61533	0	24.7255	33.4001	5.55429	6.45595	2.43117	ENST00000302418	238	3	3	1	15	2.56765	0	0.375187	3.40637	3.18159	1.43409	0.841523	ENSPTRT00000042936	248	3	3	1	15	8.48121	0.823226	0	1.0932	0.742191	0.870241	1.5795	ENSMMUT00000015811	246	3	3	1	TRUE	TRUE
ENSMMUT00000015811_243	ENSPTRT00000042936_245	ENST00000302418_235	chr10:32056191:-	18	44.6645	1.6153	0	28.2423	33.3848	6.83491	6.65517	0.981667	ENST00000302418	235	2	2	2	18	2.56753	3.08974	0.375249	3.40619	10.4098	3.11163	0.954701	ENSPTRT00000042936	245	2	2	2	18	22.4058	0.823233	0	5.717	0.742203	2.25507	1.59697	ENSMMUT00000015811	243	2	2	2	TRUE	TRUE
ENSMMUT00000015811_234	ENSPTRT00000042936_236	ENST00000302418_226	chr10:32056200:-	27	77.9608	2.79531	1.63155	42.3618	46.0847	14.0944	11.5618	0.973952	ENST00000302418	226	1	1	3	27	7.70032	11.5439	11.1122	6.19156	35.5514	12.2083	0.834068	ENSPTRT00000042936	236	1	1	3	27	61.1046	6.92416	2.15536	7.3134	7.08887	7.52471	1.46565	ENSMMUT00000015811	234	1	1	3	TRUE	TRUE
ENSMMUT00000017452_241	ENSPTRT00000004433_258	ENST00000263062_213	chr10:32346973:-	57	8.95638	2.93355	15.1348	4.2363	20.5888	1.60187	7.56924	0.849131	ENST00000263062	213	4	5	1	57	0	7.30912	44.2447	3.09162	0	5.72245	1.726	ENSPTRT00000004433	258	3	6	1	57	8.61156	0	0	5.03501	8.13455	3.54957	0.965761	ENSMMUT00000017452	241	1	6	1	TRUE	TRUE
ENSMMUT00000017452_88	ENSPTRT00000004433_105	ENST00000263062_60	chr10:32347126:-	12	1301.34	38.2856	4367.22	7990.85	49.0486	8.54093	34.9647	1.42134	ENST00000263062	60	1	4	2	12	8.16137	0	5.6148	17.3122	0	5.02856	1.15011	ENSPTRT00000004433	105	4	5	2	12	5.45541	0	0.296874	8.73975	0	3.06028	1.38254	ENSMMUT00000017452	88	2	5	2	TRUE	TRUE
ENSMMUT00000017452_79	ENSPTRT00000004433_96	ENST00000263062_51	chr10:32347135:-	21	744.049	45.6573	2495.99	4566.63	82.1696	6.83396	32.5262	1.3987	ENST00000263062	51	2	3	3	21	8.15376	15.4321	5.60858	17.2869	0	9.47987	0.765986	ENSPTRT00000004433	96	1	4	3	21	6.18081	0	0.198226	6.24188	0	2.52285	1.33387	ENSMMUT00000017452	79	3	4	3	TRUE	TRUE
ENSMMUT00000017452_70	ENSPTRT00000004433_87	ENST00000263062_42	chr10:32347144:-	30	521.134	34.2376	1747.49	3196.94	81.9413	6.83109	29.5334	1.38728	ENST00000263062	42	3	2	4	30	8.14616	15.4231	5.60238	17.2618	0	9.47203	0.765928	ENSPTRT00000004433	87	2	3	4	30	6.17802	0	0.198493	5.46069	0	2.42885	1.33578	ENSMMUT00000017452	70	4	3	4	TRUE	TRUE
ENSMMUT00000017452_31	ENSPTRT00000004433_48	ENST00000263062_3	chr10:32347183:-	18	1301.34	2.01599	0	0	0	0	2.02867	2.44495	ENST00000263062	3	5	1	5	18	0	0	0	0	0	0	0	ENSPTRT00000004433	48	6	2	5	18	0	0	0	0	0	0	0	ENSMMUT00000017452	31	6	2	5	TRUE	TRUE
ENSMMUT00000078205_168	ENSPTRT00000097535_168	ENST00000497571_96	chr10:3785114:-	100	1.0359	0.745085	3.80589	6.61459	10.6391	2.95421	2.74053	0.875834	ENST00000497571	96	1	1	1	43	5.3933	1.1348	4.08772	1.47035	2.19305	2.11105	0.637951	ENSPTRT00000097535	168	1	1	1	43	0.985735	0.494078	0	2.52164	1.11308	0.953542	0.92508	ENSMMUT00000078205	168	1	1	1	TRUE	TRUE
ENSMMUT00000079132_377	ENSPTRT00000044451_223	ENST00000395867_354	chr10:37857257:-	63	4.42695	0	0	0	1.95968	0.816385	0.781512	1.46461	ENST00000395867	354	3	4	3	63	0	0	2.61394	0	0	0.40247	2.23607	ENSPTRT00000044451	223	2	3	5	63	1.03978	0	0	0	0	0.18299	2.23607	ENSMMUT00000079132	377	3	4	3	TRUE	TRUE
ENSMMUT00000079132_367	ENSPTRT00000044451_213	ENST00000395867_344	chr10:37857267:-	27	0	0	0	0	3.91363	1.28237	1.06817	1.82296	ENST00000395867	344	2	3	4	27	0	0	0	0	0	0	0	ENSPTRT00000044451	213	4	2	6	27	1.45511	0	0	0	0	0.285427	2.23607	ENSMMUT00000079132	367	1	3	4	TRUE	TRUE
ENSMMUT00000079132_360	ENSPTRT00000044451_206	ENST00000395867_337	chr10:37857274:-	15	0	0	0	0	0	0.256889	0.192322	2.44949	ENST00000395867	337	5	2	5	15	0	0	0	0	0	0	0	ENSPTRT00000044451	206	3	1	7	15	0	0	0	0	0	0	0	ENSMMUT00000079132	360	4	2	5	TRUE	TRUE
ENSMMUT00000072997_315	ENSPTRT00000004559_326	ENST00000395797_151	chr10:43646172:-	15	0	0	0	0	0.656677	0	0.180293	2.44949	ENST00000395797	151	4	4	1	15	0	0	0	3.24947	0	0.610864	2.23607	ENSPTRT00000004559	326	1	6	1	15	0	0	0	0	0	0	0	ENSMMUT00000072997	315	6	4	6	TRUE	TRUE
ENSMMUT00000072997_302	ENSPTRT00000004559_313	ENST00000395797_138	chr10:43646185:-	52	0	0	0	1.76347	0.303835	0.700075	0.209074	1.50707	ENST00000395797	138	3	3	2	52	0	0	0	1.37918	0	0.268327	2.23607	ENSPTRT00000004559	313	4	5	2	127	0.115841	4.56719	1.52227	0	0	1.27323	1.58557	ENSMMUT00000072997	302	2	3	7	TRUE	TRUE
ENSMMUT00000042938_83	ENSPTRT00000004569_103	ENST00000340258_31	chr10:44959832:+	42	3.1882	1.24645	1.32049	4.52235	37.957	0.8045	2.68041	1.7936	ENST00000340258	31	1	1	2	42	0.475984	0.416695	0.448537	1.19555	0.901553	0.497972	0.503284	ENSPTRT00000004569	103	1	1	2	45	0	0	0	0	0	0	0	ENSMMUT00000042938	83	0	1	2	TRUE	TRUE
ENSMMUT00000042938_107	ENSPTRT00000004569_127	ENST00000340258_55	chr10:44959856:+	18	2.24413	0.497116	0.163305	2.65529	25.5766	0.333174	1.21912	1.90961	ENST00000340258	55	2	2	1	18	0.131335	0.119826	0.195046	0.50596	0.359825	0.1786	0.634435	ENSPTRT00000004569	127	2	2	1	21	0	0	0	0	0	0	0	ENSMMUT00000042938	107	0	2	1	TRUE	TRUE
ENSMMUT00000018850_659	ENSPTRT00000103821_1442	ENST00000453424_182	chr10:45533269:-	58	3.52411	0.713061	0	7.04008	6.54715	0.54051	2.17851	1.02731	ENST00000453424	182	3	5	1	58	0	0	0.402023	0.723368	0	0.356186	1.45938	ENSPTRT00000103821	1442	3	34	1	58	0.497105	0.967153	0	0	0	0.335983	1.48224	ENSMMUT00000018850	659	3	4	1	TRUE	TRUE
ENSMMUT00000018850_649	ENSPTRT00000103821_1432	ENST00000453424_172	chr10:45533279:-	42	4.93322	0	0	8.79356	6.22433	0.905456	2.68784	1.06656	ENST00000453424	172	2	4	2	42	0	0	0.416799	0.542617	0	0.39741	1.38879	ENSPTRT00000103821	1432	2	33	2	42	0.682926	0	0	0	0	0.107796	2.23607	ENSMMUT00000018850	649	4	3	2	TRUE	TRUE
ENSMMUT00000009883_215	ENSPTRT00000004684_366	ENST00000361781_836	chr10:50344212:-	54	2.69239	1.2849	1.00452	2.99368	0	3.06056	1.96597	0.685075	ENST00000361781	836	4	15	1	54	1.86723	3.81472	2.20838	1.471	2.27809	2.27772	0.382652	ENSPTRT00000004684	366	3	8	1	54	1.28883	2.3461	0.3651	2.30032	0.964795	1.50361	0.592467	ENSMMUT00000009883	215	1	9	1	TRUE	TRUE
ENSMMUT00000009883_200	ENSPTRT00000004684_351	ENST00000361781_821	chr10:50344227:-	69	3.15503	1.16492	0.870695	3.7895	0	3.32646	2.20166	0.763217	ENST00000361781	821	2	14	2	69	1.69747	2.81997	3.33477	2.01788	1.86927	2.49569	0.297976	ENSPTRT00000004684	351	2	7	2	69	1.14569	2.09912	0.365181	1.98667	0.877172	1.36997	0.571017	ENSMMUT00000009883	200	3	8	2	TRUE	TRUE
ENSMMUT00000009883_149	ENSPTRT00000004684_300	ENST00000361781_770	chr10:50344278:-	120	2.80393	0.932043	0.637409	3.76953	0	3.43648	2.01968	0.829341	ENST00000361781	770	3	13	3	120	1.43628	2.59347	3.54902	3.10492	1.42949	2.56969	0.398207	ENSPTRT00000004684	300	1	6	3	120	1.66314	1.89901	0.271554	1.68086	1.42431	1.37243	0.465647	ENSMMUT00000009883	149	2	7	3	TRUE	TRUE
ENSMMUT00000009883_103	ENSPTRT00000004684_254	ENST00000361781_724	chr10:50344324:-	9	5.76989	0	0	3.5402	29.4575	1.09937	1.51039	1.71581	ENST00000361781	724	7	12	4	9	0.350417	0	0	0	0	0.0259923	2.23607	ENSPTRT00000004684	254	6	4	5	9	0	0	1.37279	0	0	0.462338	2.23607	ENSMMUT00000009883	103	6	5	5	TRUE	TRUE
ENSMMUT00000027862_292	ENSPTRT00000088937_475	ENST00000487519_24	chr10:58385433:+	115	2.92093	2.87365	12.0642	6.85409	7.97138	3.66832	4.82208	0.599935	ENST00000487519	24	1	1	1	115	3.17425	1.63325	1.41199	8.04685	1.6322	2.60369	0.883951	ENSPTRT00000088937	475	1	3	1	118	1.89962	0.804271	0.72673	2.46115	1.55249	1.36437	0.494436	ENSMMUT00000027862	292	1	2	1	TRUE	TRUE
ENSMMUT00000042799_55	ENSPTRT00000004795_88	ENST00000609923_88	chr10:68527436:-	24	2.24239	12.0194	0	0	521.3	2.56115	4.55692	2.35812	ENST00000609923	88	1	1	1	24	1.16689	0	0	19.362	0	1.66215	2.08083	ENSPTRT00000004795	88	1	1	1	24	1.81784	0	31.9295	0	0	7.06912	2.08877	ENSMMUT00000042799	55	1	1	1	TRUE	TRUE
ENSMMUT00000023402_311	ENSPTRT00000076709_4	ENST00000265872_22	chr10:68721260:+	23	0.420969	3.60145	2.65211	5.46994	8.46223	2.04035	2.70259	0.753016	ENST00000265872	22	2	2	1	9	0	0	1.36554	2.82791	0	0.761592	1.50168	ENSPTRT00000076709	4	1	1	3	23	2.66866	0.551435	1.99657	1.05894	1.09135	1.33365	0.574912	ENSMMUT00000023402	311	4	4	1	TRUE	TRUE
ENSMMUT00000015783_1520	ENSPTRT00000066704_1537	ENST00000372950_1534	chr10:73247329:-	36	0	0	0	0	0	0	0	0	ENST00000372950	1534	0	28	1	36	0	0	0	0	0	0	0	ENSPTRT00000066704	1537	0	32	1	48	0	0	0	0	0	0	0	ENSMMUT00000015783	1520	0	31	1	TRUE	TRUE
ENSMMUT00000015783_1303	ENSPTRT00000066704_1324	ENST00000372950_1321	chr10:73247542:-	42	0	0	0	0	0	0	0	0	ENST00000372950	1321	0	26	3	42	0	0	0	0	0	0	0	ENSPTRT00000066704	1324	0	30	3	42	0	0	0	0	0	0	0	ENSMMUT00000015783	1303	0	30	2	TRUE	TRUE
ENSMMUT00000015783_1244	ENSPTRT00000066704_1264	ENST00000372950_1261	chr10:73247602:-	57	0	0	0	0	0	0	0	0	ENST00000372950	1261	0	25	4	57	0	0	0	0	0	0	0	ENSPTRT00000066704	1264	0	29	4	30	0	0	0	0	0	0	0	ENSMMUT00000015783	1244	0	29	3	TRUE	TRUE
ENSMMUT00000015783_1238	ENSPTRT00000066704_1258	ENST00000372950_1255	chr10:73247608:-	63	0	0	0	0	0	0	0	0	ENST00000372950	1255	0	24	5	63	0	0	0	0	0	0	0	ENSPTRT00000066704	1258	0	28	5	36	0	0	0	0	0	0	0	ENSMMUT00000015783	1238	0	28	4	TRUE	TRUE
ENSMMUT00000015783_1223	ENSPTRT00000066704_1243	ENST00000372950_1240	chr10:73247623:-	15	0	0	0	0	0	0	0	0	ENST00000372950	1240	0	23	6	15	0	0	0	0	0	0	0	ENSPTRT00000066704	1243	0	27	6	6	0	0	0	0	0	0	0	ENSMMUT00000015783	1223	0	27	5	TRUE	TRUE
ENSMMUT00000015783_1030	ENSPTRT00000066704_1033	ENST00000372950_1030	chr10:73247833:-	207	0	0	0	0	0	0	0	0	ENST00000372950	1030	0	22	7	126	0	0	0	0	0	0	0	ENSPTRT00000066704	1033	0	26	7	87	0	0	0	0	0	0	0	ENSMMUT00000015783	1030	0	26	6	TRUE	TRUE
ENSMMUT00000015783_1015	ENSPTRT00000066704_1014	ENST00000372950_1011	chr10:73247852:-	27	0	0	0	0	0	0	0	0	ENST00000372950	1011	0	21	8	27	0	0	0	0	0	0	0	ENSPTRT00000066704	1014	0	25	8	102	0	0	0	0	0	0	0	ENSMMUT00000015783	1015	0	25	7	TRUE	TRUE
ENSMMUT00000015783_927	ENSPTRT00000066704_926	ENST00000372950_921	chr10:73247942:-	117	0	0	0	0	0	0	0	0	ENST00000372950	921	0	19	10	72	0	0	0	0	0	0	0	ENSPTRT00000066704	926	0	23	10	72	0	0	0	0	0	0	0	ENSMMUT00000015783	927	0	24	8	TRUE	TRUE
ENSMMUT00000015783_886	ENSPTRT00000066704_885	ENST00000372950_880	chr10:73247983:-	78	0	0	0	0	0	0	0	0	ENST00000372950	880	0	18	11	156	0	0	0	0	0	0	0	ENSPTRT00000066704	885	0	22	11	78	0	0	0	0	0	0	0	ENSMMUT00000015783	886	0	23	9	TRUE	TRUE
ENSMMUT00000015783_780	ENSPTRT00000066704_779	ENST00000372950_774	chr10:73248089:-	39	0	0	0	0	0	0	0	0	ENST00000372950	774	0	17	12	39	0	0	0	0	0	0	0	ENSPTRT00000066704	779	0	21	12	219	0	0	0	0	0	0	0	ENSMMUT00000015783	780	0	22	10	TRUE	TRUE
ENSMMUT00000015783_692	ENSPTRT00000066704_692	ENST00000372950_692	chr10:73248171:-	15	0	0	0	0	0	0	0	0	ENST00000372950	692	0	16	13	15	0	0	0	0	0	0	0	ENSPTRT00000066704	692	0	20	13	21	0	0	0	0	0	0	0	ENSMMUT00000015783	692	0	21	11	TRUE	TRUE
ENSMMUT00000015783_679	ENSPTRT00000066704_679	ENST00000372950_679	chr10:73248184:-	75	0	0	0	0	0	0	0	0	ENST00000372950	679	0	15	14	36	0	0	0	0	0	0	0	ENSPTRT00000066704	679	0	19	14	126	0	0	0	0	0	0	0	ENSMMUT00000015783	679	0	20	12	TRUE	TRUE
ENSMMUT00000015783_629	ENSPTRT00000066704_629	ENST00000372950_629	chr10:73248234:-	54	0	0	0	0	0	0	0	0	ENST00000372950	629	0	14	15	54	0	0	0	0	0	0	0	ENSPTRT00000066704	629	0	18	15	54	0	0	0	0	0	0	0	ENSMMUT00000015783	629	0	19	13	TRUE	TRUE
ENSMMUT00000015783_584	ENSPTRT00000066704_584	ENST00000372950_584	chr10:73248279:-	9	0	0	0	0	0	0	0	0	ENST00000372950	584	0	13	16	9	0	0	0	0	0	0	0	ENSPTRT00000066704	584	0	17	16	9	0	0	0	0	0	0	0	ENSMMUT00000015783	584	0	17	15	TRUE	TRUE
ENSMMUT00000015783_520	ENSPTRT00000066704_520	ENST00000372950_520	chr10:73248343:-	27	0	0	0	0	0	0	0	0	ENST00000372950	520	0	12	17	27	0	0	0	0	0	0	0	ENSPTRT00000066704	520	0	16	17	27	0	0	0	0	0	0	0	ENSMMUT00000015783	520	0	15	17	TRUE	TRUE
ENSMMUT00000015783_423	ENSPTRT00000066704_423	ENST00000372950_423	chr10:73248440:-	9	0	0	0	0	0	0	0	0	ENST00000372950	423	0	11	18	9	0	0	0	0	0	0	0	ENSPTRT00000066704	423	0	14	19	9	0	0	0	0	0	0	0	ENSMMUT00000015783	423	0	14	18	TRUE	TRUE
ENSMMUT00000015783_399	ENSPTRT00000066704_399	ENST00000372950_399	chr10:73248464:-	33	0	0	0	0	0	0	0	0	ENST00000372950	399	0	10	19	33	0	0	0	0	0	0	0	ENSPTRT00000066704	399	0	13	20	33	0	0	0	0	0	0	0	ENSMMUT00000015783	399	0	13	19	TRUE	TRUE
ENSMMUT00000015783_341	ENSPTRT00000066704_341	ENST00000372950_341	chr10:73248522:-	9	0	0	0	0	0	0	0	0	ENST00000372950	341	0	9	20	9	0	0	0	0	0	0	0	ENSPTRT00000066704	341	0	11	22	12	0	0	0	0	0	0	0	ENSMMUT00000015783	341	0	11	21	TRUE	TRUE
ENSMMUT00000015783_327	ENSPTRT00000066704_327	ENST00000372950_327	chr10:73248536:-	36	0	0	0	0	0	0	0	0	ENST00000372950	327	0	8	21	36	0	0	0	0	0	0	0	ENSPTRT00000066704	327	0	10	23	36	0	0	0	0	0	0	0	ENSMMUT00000015783	327	0	10	22	TRUE	TRUE
ENSMMUT00000015783_303	ENSPTRT00000066704_306	ENST00000372950_306	chr10:73248557:-	57	0	0	0	0	0	0	0	0	ENST00000372950	306	0	7	22	57	0	0	0	0	0	0	0	ENSPTRT00000066704	306	0	9	24	60	0	0	0	0	0	0	0	ENSMMUT00000015783	303	0	9	23	TRUE	TRUE
ENSMMUT00000015783_249	ENSPTRT00000066704_252	ENST00000372950_252	chr10:73248611:-	6	0	0	0	0	0	0	0	0	ENST00000372950	252	0	5	24	6	0	0	0	0	0	0	0	ENSPTRT00000066704	252	0	7	26	6	0	0	0	0	0	0	0	ENSMMUT00000015783	249	0	8	24	TRUE	TRUE
ENSMMUT00000015783_62	ENSPTRT00000066704_62	ENST00000372950_62	chr10:73248801:-	75	0	0	0	0	0	0	0	0	ENST00000372950	62	0	3	26	75	0	0	0	0	0	0	0	ENSPTRT00000066704	62	0	4	29	75	0	0	0	0	0	0	0	ENSMMUT00000015783	62	0	4	28	TRUE	TRUE
ENSMMUT00000015783_50	ENSPTRT00000066704_50	ENST00000372950_50	chr10:73248813:-	12	0	0	0	0	0	0	0	0	ENST00000372950	50	0	2	27	87	0	0	0	0	0	0	0	ENSPTRT00000066704	50	0	2	31	87	0	0	0	0	0	0	0	ENSMMUT00000015783	50	0	3	29	TRUE	TRUE
ENSMMUT00000015783_34	ENSPTRT00000066704_34	ENST00000372950_34	chr10:73248829:-	12	0	0	0	0	0	0	0	0	ENST00000372950	34	0	1	28	12	0	0	0	0	0	0	0	ENSPTRT00000066704	34	0	1	32	9	0	0	0	0	0	0	0	ENSMMUT00000015783	34	0	2	30	TRUE	TRUE
ENSMMUT00000002561_951	ENSPTRT00000004952_831	ENST00000339859_90	chr10:73575670:-	6	0	0	0	0	0	0	0	0	ENST00000339859	90	0	2	1	6	0	0	0	0	0	0	0	ENSPTRT00000004952	831	11	11	1	6	0	0	0	0	0	0	0	ENSMMUT00000002561	951	11	11	1	TRUE	TRUE
ENSMMUT00000012264_18	ENSPTRT00000004962_165	ENST00000339365_152	chr10:73746822:+	11	1.1813	0.734313	0	8.8487	4.33113	0.434821	1.02215	1.32695	ENST00000339365	152	2	2	1	11	3.22725	0	0.609986	0.561438	0	0.642055	1.52852	ENSPTRT00000004962	165	1	2	1	11	0.41601	0.325698	1.482	0.599043	0	0.54873	0.986522	ENSMMUT00000012264	18	1	1	1	TRUE	TRUE
ENSMMUT00000008530_1115	ENSPTRT00000057703_756	ENST00000372524_329	chr10:75401436:-	17	1836.77	10.0685	10274.5	3.52575	0	20.4139	21.1922	2.02915	ENST00000372524	329	1	1	1	17	0	0	221.314	0	0	0.916662	2.23607	ENSPTRT00000057703	756	1	4	1	17	0	0	0	0	0	0	0	ENSMMUT00000008530	1115	0	5	1	TRUE	TRUE
ENSMMUT00000007763_18	ENSPTRT00000082024_33	ENST00000372371_5	chr10:78029511:-	9	0	2459.66	0	0	0	3.84367	2.17724	2.44491	ENST00000372371	5	1	1	1	9	0	0	4.48906	3487.06	0	2.35126	2.23248	ENSPTRT00000082024	33	2	2	1	9	0	0	0	0	0	0	0	ENSMMUT00000007763	18	0	1	1	TRUE	TRUE
ENSMMUT00000027712_148	ENSPTRT00000108699_420	ENST00000372088_244	chr10:84371037:+	16	0	0	0	0	0	2.55708	0.162094	2.44949	ENST00000372088	244	3	3	1	16	0	0	0	0	0	0	0	ENSPTRT00000108699	420	5	5	1	16	0	0	0	0	0	0	0	ENSMMUT00000027712	148	0	4	1	TRUE	TRUE
ENSMMUT00000005561_241	ENSPTRT00000005101_445	ENST00000298767_434	chr10:86518086:-	17	3.36535	0.841428	0.502503	3948.93	3.27796	2.0519	2.06435	2.44204	ENST00000298767	434	3	3	1	45	3.50101	2.40259	4.04658	3.75688	17.9478	4.21078	1.03045	ENSPTRT00000005101	445	2	3	1	17	0.395744	1.79215	0	0	0.667957	0.615004	1.29352	ENSMMUT00000005561	241	1	1	1	TRUE	TRUE
ENSMMUT00000016601_74	ENSPTRT00000005116_1413	ENST00000372037_459	chr10:86875940:+	15	20.9203	2.69167	0	15.896	0	0.733113	3.77317	1.37987	ENST00000372037	459	1	6	1	15	0	0	0	0	0	0	0	ENSPTRT00000005116	1413	0	36	1	24	0.390271	0	0	0	0	0.062592	2.23607	ENSMMUT00000016601	74	1	1	1	TRUE	TRUE
ENSMMUT00000028111_3	ENSPTRT00000045540_1526	ENST00000543648_180	chr10:91222691:+	30	1.59273	2.66807	2.23825	5.90009	3.1171	1.36531	2.35895	0.585282	ENST00000543648	180	2	3	5	30	0	0	1.48226	0.821337	0	0.509781	1.46022	ENSPTRT00000045540	1526	6	24	5	105	2.04318	0.15098	0.0646765	0	0.456944	0.273773	1.57714	ENSMMUT00000028111	3	4	1	4	TRUE	TRUE
ENSMMUT00000028111_32	ENSPTRT00000045540_1555	ENST00000543648_209	chr10:91222720:+	105	2.39236	2.3036	1.8729	3.58875	1.24361	1.79539	2.07198	0.361548	ENST00000543648	209	3	4	4	105	1.84873	0.333979	1.40886	1.90092	1.19305	1.25125	0.474746	ENSPTRT00000045540	1555	2	25	4	30	0.121584	1.88931	0	0	0	0.416213	2.07121	ENSMMUT00000028111	32	3	2	3	TRUE	TRUE
ENSMMUT00000028111_60	ENSPTRT00000045540_1583	ENST00000543648_237	chr10:91222748:+	102	1.17102	1.40936	0.368022	1.36527	0.522147	1.34029	1.03684	0.44912	ENST00000543648	237	5	6	2	102	1.66188	0.291945	0.94648	1.39124	0.41573	0.906842	0.632779	ENSPTRT00000045540	1583	4	27	2	48	0.780142	1.15813	0.0519877	0	0.645435	0.567502	0.938886	ENSMMUT00000028111	60	2	3	2	TRUE	TRUE
ENSMMUT00000028111_72	ENSPTRT00000045540_1595	ENST00000543648_249	chr10:91222760:+	90	0.81057	1.26023	0.405078	1.35125	0.324291	1.21906	0.871478	0.504466	ENST00000543648	249	6	7	1	90	1.71019	0.304707	0.99576	1.19205	0.426638	0.871802	0.621853	ENSPTRT00000045540	1595	5	28	1	36	0.6502	1.38078	0.0596566	0	0.674739	0.603699	1.01425	ENSMMUT00000028111	72	1	4	1	TRUE	TRUE
ENSMMUT00000042747_747	ENSPTRT00000098559_16	ENST00000371207_20	chr10:95755671:+	44	1.49427	0	0	8.7907	0	0	1.63922	2.05227	ENST00000371207	20	1	1	2	44	0	0	5.60284	0	0	2.48698	2.23607	ENSPTRT00000098559	16	2	1	2	69	0	0	0	0	0	0	0	ENSMMUT00000042747	747	16	14	6	TRUE	TRUE
ENSMMUT00000042747_774	ENSPTRT00000098559_43	ENST00000371207_47	chr10:95755698:+	17	0	0	0	2820.95	0	0	1.38626	2.44949	ENST00000371207	47	2	2	1	17	0	0	5.61526	0	0	2.49299	2.23607	ENSPTRT00000098559	43	1	2	1	42	0	0	0	0	0	0	0	ENSMMUT00000042747	774	18	15	5	TRUE	TRUE
ENSMMUT00000023448_185	ENSPTRT00000005277_186	ENST00000465148_5	chr10:96043587:+	39	0	0	3583.54	0	5.87766	0	8.42872	2.44468	ENST00000465148	5	1	1	2	39	0	12.3116	1249.44	0	0	5.62076	2.2089	ENSPTRT00000005277	186	1	3	2	39	10.8612	0	7.67767	0	13.2903	7.09075	0.964929	ENSMMUT00000023448	185	1	1	2	TRUE	TRUE
ENSMMUT00000023448_255	ENSPTRT00000005277_256	ENST00000465148_75	chr10:96043657:+	48	0	2.01048	0	0	0	0	1.01693	2.44949	ENST00000465148	75	2	2	1	48	0	0	0	0	0	0	0	ENSPTRT00000005277	256	4	4	1	48	12.5721	0	0	0	0	1.48714	2.23607	ENSMMUT00000023448	255	2	2	1	TRUE	TRUE
ENSMMUT00000025339_331	ENSPTRT00000048528_316	ENST00000423855_313	chr1:103526011:+	15	1.24684	0	0	0	2.2964	0.64175	0.922888	1.33278	ENST00000423855	313	1	1	1	15	0	0	0	2.78643	0	0.471199	2.23607	ENSPTRT00000048528	316	1	2	1	15	0	0	0	0	0	0	0	ENSMMUT00000025339	331	0	2	1	TRUE	TRUE
ENSMMUT00000014188_65	ENSPTRT00000001951_804	ENST00000406462_528	chr1:108885277:+	21	0	4.03533	0	0	4.58693	0.855412	2.68908	1.36027	ENST00000406462	528	3	3	5	21	0	0	0	0	0	0	0	ENSPTRT00000001951	804	8	4	5	21	0.910044	0	0	3.73544	0	0.619442	1.74097	ENSMMUT00000014188	65	2	2	5	TRUE	TRUE
ENSMMUT00000014188_97	ENSPTRT00000001951_836	ENST00000406462_560	chr1:108885309:+	66	0.748971	0.527276	0	3.511	0	1.28161	0.588075	1.30188	ENST00000406462	560	4	4	4	66	0	0.421846	0.562539	0.591766	0	0.475654	0.935341	ENSPTRT00000001951	836	2	5	4	66	0.749623	0.685199	0	0.315807	0.940068	0.549916	0.69958	ENSMMUT00000014188	97	3	3	4	TRUE	TRUE
ENSMMUT00000014188_186	ENSPTRT00000001951_925	ENST00000406462_649	chr1:108885398:+	9	0	0	0	0	0	0.36673	0.0989994	2.44949	ENST00000406462	649	6	5	3	9	3.50143	0	0	0	0	0.305308	2.23607	ENSPTRT00000001951	925	4	6	3	9	0.242777	0	0	0	0	0.0499243	2.23607	ENSMMUT00000014188	186	5	4	3	TRUE	TRUE
ENSMMUT00000014188_224	ENSPTRT00000001951_963	ENST00000406462_687	chr1:108885436:+	51	2.24149	9.67662	0	3.52575	3.91499	0.962044	3.38472	1.01014	ENST00000406462	687	1	6	2	51	0	0	0.61361	0.104002	0	0.331857	1.85767	ENSPTRT00000001951	963	3	7	2	15	0.56881	0	0	0	0	0.0778974	2.23607	ENSMMUT00000014188	224	4	5	2	TRUE	TRUE
ENSMMUT00000014188_303	ENSPTRT00000001951_1042	ENST00000406462_766	chr1:108885515:+	8	0	0	0	0	0	0.3667	0.153313	2.44949	ENST00000406462	766	5	7	1	8	0	0	0	1.33424	0	0.166578	2.23607	ENSPTRT00000001951	1042	5	8	1	8	0	0	0	0	0	0	0	ENSMMUT00000014188	303	6	6	1	TRUE	TRUE
ENSMMUT00000008159_434	ENSPTRT00000085367_257	ENST00000528667_433	chr1:109620269:+	56	10.0277	2.68098	0	0	892.943	7.57516	9.4555	2.38435	ENST00000528667	433	1	2	2	56	0	0	0	0	1550.11	7.72704	2.23607	ENSPTRT00000085367	257	1	1	2	15	0.0959931	0	0	1.5932	0	0.423223	2.08087	ENSMMUT00000008159	434	2	2	3	TRUE	TRUE
ENSMMUT00000008159_663	ENSPTRT00000085367_332	ENST00000528667_508	chr1:109620979:+	30	0	0	0	0	0	0	0	0	ENST00000528667	508	3	3	1	30	0	0	0	0	0	0	0	ENSPTRT00000085367	332	2	2	1	30	0	0	0	0	0	0	0	ENSMMUT00000008159	663	4	4	1	TRUE	TRUE
ENSMMUT00000021060_8	ENSPTRT00000050208_443	ENST00000369779_60	chr1:110390967:-	9	0	0	0	0	0	0	0	0	ENST00000369779	60	4	4	1	9	0	0	0	0	0	0	0	ENSPTRT00000050208	443	9	10	1	9	0	0	0	0	0	0	0	ENSMMUT00000021060	8	0	2	2	TRUE	TRUE
ENSMMUT00000021060_3	ENSPTRT00000050208_438	ENST00000369779_55	chr1:110390972:-	45	0	0	0	13.9511	0	0	5.88099	2.44949	ENST00000369779	55	3	3	2	45	0	2.31455	666.837	0	0	1.63577	2.22641	ENSPTRT00000050208	438	3	9	2	45	0	0	0	0	0	0	0	ENSMMUT00000021060	3	0	1	3	TRUE	TRUE
ENSMMUT00000015370_270	ENSPTRT00000007901_563	ENST00000531837_142	chr11:106076602:-	66	2.68703	0	0	0.273793	0	0	0.404665	2.18896	ENST00000531837	142	3	3	1	66	0	0	0	0	0	0	0	ENSPTRT00000007901	563	6	7	1	66	0.662354	0	0	0	0	0.151125	2.23607	ENSMMUT00000015370	270	3	3	1	TRUE	TRUE
ENSMMUT00000015370_260	ENSPTRT00000007901_553	ENST00000531837_132	chr11:106076612:-	33	4.47806	0	0	1.18017	0	0.367439	0.723438	1.75484	ENST00000531837	132	2	2	2	33	0	0	0.675417	4.76158	0	0.77715	1.9079	ENSPTRT00000007901	553	2	6	2	33	1.61693	0	4.02669	0	0	1.28557	1.56357	ENSMMUT00000015370	260	2	2	2	TRUE	TRUE
ENSMMUT00000015370_196	ENSPTRT00000007901_489	ENST00000531837_68	chr11:106076676:-	78	1.34594	0	9.66768	0.37375	2.07715	0.48181	1.1988	1.58126	ENST00000531837	68	1	1	3	78	3.49777	0	1.12448	2.88762	0.170433	1.249	1.03288	ENSPTRT00000007901	489	1	5	3	78	1.53181	2.78888	3.75051	4.25528	0	2.24582	0.699922	ENSMMUT00000015370	196	1	1	3	TRUE	TRUE
ENSMMUT00000020912_28	ENSPTRT00000106769_36	ENST00000320578_13	chr11:107928460:+	39	0	0	0	3.52343	1601.92	5.0784	13.9028	2.4338	ENST00000320578	13	1	1	1	39	0	0	1729.61	0	0	31.0253	2.23607	ENSPTRT00000106769	36	1	1	1	39	3.62427	8.39679	0	24.8976	6.81471	10.045	1.09579	ENSMMUT00000020912	28	1	1	1	TRUE	TRUE
ENSMMUT00000005906_180	ENSPTRT00000007922_24	ENST00000278612_24	chr11:108222615:-	79	0.898275	2.88217	4.8827	3.50506	6.81976	1.70894	2.41462	0.625482	ENST00000278612	24	1	1	1	79	0	1.03016	0	2.33225	7.55651	0.98779	1.44367	ENSPTRT00000007922	24	1	1	1	79	1.03975	1.39933	0	0	0	0.459772	1.39389	ENSMMUT00000005906	180	1	1	1	TRUE	TRUE
ENSMMUT00000043730_39	ENSPTRT00000061675_141	ENST00000278616_141	chr11:108222972:+	216	4.18377	0.238745	0	5.22807	3.82467	0.962049	1.49404	0.942355	ENST00000278616	141	3	4	2	222	2.36123	0.812183	1.59606	1.15152	0	1.18912	0.743025	ENSPTRT00000061675	141	2	4	2	219	12.9967	0.505372	1.05374	1.77131	0	1.37481	1.67806	ENSMMUT00000043730	39	2	2	5	TRUE	TRUE
ENSMMUT00000043730_785	ENSPTRT00000061675_362	ENST00000278616_362	chr11:108227601:+	21	32.109	6.67764	7.12077	3.53914	4.06025	3.77129	5.83722	1.16903	ENST00000278616	362	1	5	1	21	0	0	1.8938	11.6693	1.01277	2.01746	1.70046	ENSPTRT00000061675	362	1	5	1	21	1.36428	0	0	0	0	0.0643238	2.23607	ENSMMUT00000043730	785	3	6	1	TRUE	TRUE
ENSMMUT00000024711_170	ENSPTRT00000034508_190	ENST00000440460_122	chr11:111937324:+	21	0	0	0	0	0	0	0	0	ENST00000440460	122	2	1	3	21	0	0	4.47657	0	0	3.61663	2.23607	ENSPTRT00000034508	190	2	1	3	21	0	0	0	248.984	0	52.1164	2.23607	ENSMMUT00000024711	170	1	1	3	TRUE	TRUE
ENSMMUT00000024711_223	ENSPTRT00000034508_243	ENST00000440460_175	chr11:111937377:+	33	237.425	0	0	0	0	0	46.3693	2.44949	ENST00000440460	175	1	2	2	33	0	6.67474	0	0	0	7.81064	2.23607	ENSPTRT00000034508	243	1	2	2	33	0	0	0	0	0	0	0	ENSMMUT00000024711	223	2	2	2	TRUE	TRUE
ENSMMUT00000024711_247	ENSPTRT00000034508_267	ENST00000440460_199	chr11:111937401:+	9	0	0	0	0	0	0	0	0	ENST00000440460	199	3	3	1	9	0	0	0	0	0	0	0	ENSPTRT00000034508	267	3	3	1	9	0	0	0	0	0	0	0	ENSMMUT00000024711	247	3	3	1	TRUE	TRUE
ENSMMUT00000043710_618	ENSPTRT00000007963_432	ENST00000280346_72	chr11:112024885:+	123	0	0	0	0	0	0	0	0	ENST00000280346	72	2	1	2	123	0	0	0	0	0	0	0	ENSPTRT00000007963	432	8	9	2	123	0	0	17.3386	0	0	5.40592	2.23607	ENSMMUT00000043710	618	1	11	3	TRUE	TRUE
ENSMMUT00000043710_907	ENSPTRT00000007963_721	ENST00000280346_361	chr11:112025174:+	299	0.357309	1.72801	19.1816	3.51079	1.30797	1.09904	1.76232	1.60111	ENST00000280346	361	1	2	1	299	1.74744	0.652486	2.70508	1.14042	3.69314	1.40363	0.61521	ENSPTRT00000007963	721	1	10	1	225	5.95462	0	2.59248	0	0	1.35721	1.53576	ENSMMUT00000043710	907	4	13	1	TRUE	TRUE
ENSMMUT00000054503_127	ENSPTRT00000007965_127	ENST00000280350_127	chr11:112074045:-	30	0	0	0	0	0	0	0	0	ENST00000280350	127	0	2	1	30	0	0	0	0	0	0	0	ENSPTRT00000007965	127	0	2	1	30	0	0	0	0	0	0	0	ENSMMUT00000054503	127	0	2	1	TRUE	TRUE
ENSMMUT00000054503_85	ENSPTRT00000007965_85	ENST00000280350_85	chr11:112074087:-	42	0	0	0	0	0	0	0	0	ENST00000280350	85	0	1	2	42	0	0	0	0	0	0	0	ENSPTRT00000007965	85	0	1	2	42	0	0	0	0	0	0	0	ENSMMUT00000054503	85	0	1	2	TRUE	TRUE
ENSMMUT00000017188_81	ENSPTRT00000008011_83	ENST00000375490_83	chr11:114400611:+	60	8.84275	0	0	0	0	0.643063	0.637773	2.2561	ENST00000375490	83	1	1	1	62	0	0	0.643589	0	0	0.145321	2.23607	ENSPTRT00000008011	83	1	1	1	60	0	0	0	0	0	0	0	ENSMMUT00000017188	81	0	1	1	TRUE	TRUE
ENSMMUT00000063503_274	ENSPTRT00000081836_449	ENST00000357260_146	chr1:111739250:-	8	0	0	0	1199.48	0	3.41821	1.90593	2.44115	ENST00000357260	146	1	1	1	8	0	0	0	4.33191	0	0.203735	2.23607	ENSPTRT00000081836	449	3	3	1	8	7.2642	0	0	0	0	1.49042	2.23607	ENSMMUT00000063503	274	1	1	1	TRUE	TRUE
ENSMMUT00000032179_774	ENSPTRT00000066998_714	ENST00000399455_28	chr11:11842093:+	27	17.1941	23.31	60.2472	77.5337	126.927	17.5693	29.9977	0.811729	ENST00000399455	28	1	1	1	27	11.5304	9.40517	29.0149	12.4013	3.31282	11.5888	0.728038	ENSPTRT00000066998	714	1	6	1	27	10.7079	1.73853	4.37613	3.22198	0.247697	3.30355	0.992654	ENSMMUT00000032179	774	3	5	1	TRUE	TRUE
ENSMMUT00000013019_10	ENSPTRT00000082808_1345	ENST00000292174_15	chr11:118883780:+	132	0	0	0	146.27	0	0	23.6847	2.44949	ENST00000292174	15	2	1	2	132	1.67354	0.803915	3.50823	1.15593	0	1.66662	0.918891	ENSPTRT00000082808	1345	3	20	2	132	0.91165	0	0	0	0	0.103515	2.23607	ENSMMUT00000013019	10	2	1	2	TRUE	TRUE
ENSMMUT00000013019_53	ENSPTRT00000082808_1388	ENST00000292174_58	chr11:118883823:+	21	0	0	0	457.563	0	0	72.2946	2.44949	ENST00000292174	58	1	2	1	21	0	0	10.1025	8.61774	0	3.54203	1.37647	ENSPTRT00000082808	1388	2	21	1	21	290.089	0	0	0	0	52.1164	2.23607	ENSMMUT00000013019	53	1	2	1	TRUE	TRUE
ENSMMUT00000073394_33	ENSPTRT00000008094_59	ENST00000334418_13	chr11:118998150:+	9	0	0	0	1066.31	0	1741.97	3.03997	1.61505	ENST00000334418	13	1	1	1	9	0	35.4349	0	3487.06	0	12.7732	2.20806	ENSPTRT00000008094	59	1	1	1	9	0	0	0	0	0	0	0	ENSMMUT00000073394	33	0	1	1	TRUE	TRUE
ENSMMUT00000023728_719	ENSPTRT00000107432_60	ENST00000357590_281	chr11:119029530:-	161	4.42411	1.58345	7.90181	1.87192	6.22481	1.10837	2.83237	0.724524	ENST00000357590	281	1	2	1	161	0.233717	0.0816679	1.1876	1.30798	1.02142	0.716819	0.74044	ENSPTRT00000107432	60	1	1	1	161	0.614417	0.168768	1.20618	1.03948	0.291666	0.804831	0.682312	ENSMMUT00000023728	719	3	5	1	TRUE	TRUE
ENSMMUT00000054597_708	ENSPTRT00000066690_189	ENST00000397843_685	chr11:120337097:+	9	0	0	17.3933	7.06306	4857.13	0.285261	2.19689	2.43461	ENST00000397843	685	5	3	4	9	0	0	0	0	0	0	0	ENSPTRT00000066690	189	3	1	4	9	2.42512	0	0	7.06035	0	1.00796	1.61902	ENSMMUT00000054597	708	3	3	4	TRUE	TRUE
ENSMMUT00000054597_717	ENSPTRT00000066690_198	ENST00000397843_694	chr11:120337106:+	111	3.36051	0	0	6.84361	1125.97	0.713146	2.32306	2.4213	ENST00000397843	694	4	4	3	111	1.50033	0	0.614015	1.37936	0	0.69247	1.03435	ENSPTRT00000066690	198	1	2	3	111	0	0	0	0	0	0	0	ENSMMUT00000054597	717	4	4	3	TRUE	TRUE
ENSMMUT00000054597_725	ENSPTRT00000066690_206	ENST00000397843_702	chr11:120337114:+	12	5.2348	0	0	0	0	0.51343	2.40802	2.19743	ENST00000397843	702	3	5	2	12	0	0	0	2.16705	0	0.24463	2.23607	ENSPTRT00000066690	206	2	3	2	12	0	0	0	0	0	0	0	ENSMMUT00000054597	725	5	5	2	TRUE	TRUE
ENSMMUT00000054597_813	ENSPTRT00000066690_294	ENST00000397843_790	chr11:120337202:+	15	0	0	0	0	2914.68	0	0.929101	2.44949	ENST00000397843	790	6	6	1	15	0	0	0	0	0	0	0	ENSPTRT00000066690	294	4	4	1	15	0	0	0	0	0	0	0	ENSMMUT00000054597	813	6	6	1	TRUE	TRUE
ENSMMUT00000014890_2723	ENSPTRT00000008175_1325	ENST00000530393_377	chr11:123730917:-	9	0	2.56958	3.26088	14.1228	0	0	1.92697	1.64885	ENST00000530393	377	2	5	1	9	0	0	1.4055	0	0	0.65429	2.23607	ENSPTRT00000008175	1325	1	28	1	9	4722.79	0	0	16.7958	5.93388	8.0074	2.22269	ENSMMUT00000014890	2723	1	71	1	TRUE	TRUE
ENSMMUT00000014890_2704	ENSPTRT00000008175_1306	ENST00000530393_358	chr11:123730936:-	12	0	0	0	0	0	0	0	0	ENST00000530393	358	5	4	2	12	0	0	0	1.44489	0	0.153281	2.23607	ENSPTRT00000008175	1306	3	27	2	12	0	0	0	0	0	0	0	ENSMMUT00000014890	2704	46	70	2	TRUE	TRUE
ENSMMUT00000025944_176	ENSPTRT00000002079_1888	ENST00000271277_79	chr1:112412213:+	18	0	0	0	3.53599	0	0	0.437048	2.44949	ENST00000271277	79	1	2	2	18	6.41473	0	0	0	0	1.18443	2.23607	ENSPTRT00000002079	1888	1	20	2	18	0	0	0	0	0	0	0	ENSMMUT00000025944	176	0	5	3	TRUE	TRUE
ENSMMUT00000025944_182	ENSPTRT00000002079_1894	ENST00000271277_85	chr1:112412219:+	12	0	0	0	0	0	0	0	0	ENST00000271277	85	3	3	1	12	0	0	0	0	0	0	0	ENSPTRT00000002079	1894	13	21	1	12	0	0	0	0	0	0	0	ENSMMUT00000025944	182	0	6	2	TRUE	TRUE
ENSMMUT00000043627_197	ENSPTRT00000055150_204	ENST00000441174_180	chr11:124623043:+	41	18.6697	1.94401	6.52534	13.0856	25.2737	6.83629	8.87557	0.722736	ENST00000441174	180	1	1	1	41	8.27036	10.2387	10.0248	10.6123	4.52641	9.04221	0.288371	ENSPTRT00000055150	204	1	1	1	41	1.8193	10.8347	5.20477	6.10976	1.39668	5.02317	0.753139	ENSMMUT00000043627	197	1	1	1	TRUE	TRUE
ENSMMUT00000070319_459	ENSPTRT00000008236_115	ENST00000227474_53	chr11:125896315:-	31	1.79421	0	0	0	0	0	0.227012	2.44949	ENST00000227474	53	1	1	1	31	0	0	0	0	0	0	0	ENSPTRT00000008236	115	0	2	1	31	1.59164	0	0	0	0	0.123297	2.23607	ENSMMUT00000070319	459	1	12	1	TRUE	TRUE
ENSMMUT00000009684_99	ENSPTRT00000008256_20	ENST00000356132_91	chr11:126406115:+	3	0	0	0	0	0	0	0	0	ENST00000356132	91	0	2	1	36	0	0	0	0.310975	0	0.0320084	2.23607	ENSPTRT00000008256	20	1	1	1	36	0.728068	0	0	0	3.33809	0.937739	1.77836	ENSMMUT00000009684	99	1	2	1	TRUE	TRUE
ENSMMUT00000075584_457	ENSPTRT00000045786_293	ENST00000527786_147	chr11:128694218:+	41	0.792331	0	0.900656	1.76964	1.37796	4.39105	0.792371	0.987686	ENST00000527786	147	1	1	1	41	0	0	0.532867	0.722883	0	0.244375	1.39519	ENSPTRT00000045786	293	1	1	1	41	0.520365	1.45044	1.27014	0	0	0.668393	1.05965	ENSMMUT00000075584	457	1	3	1	TRUE	TRUE
ENSMMUT00000025452_495	ENSPTRT00000008314_497	ENST00000265909_497	chr11:130916013:-	36	1.60235	4.03467	0	267.328	19.5867	0.257399	3.31678	2.19891	ENST00000265909	497	3	4	1	36	0	0.364066	0	0.465101	0	0.192014	1.38615	ENSPTRT00000008314	497	5	5	1	27	0	0	0	0	0	0	0	ENSMMUT00000025452	495	6	6	1	TRUE	TRUE
ENSMMUT00000025452_383	ENSPTRT00000008314_383	ENST00000265909_383	chr11:130916127:-	45	4.0323	3.66752	0	20.9185	0	2.09736	2.65721	1.54911	ENST00000265909	383	4	3	2	45	1.64744	0.772799	2.56905	1.16732	7.06871	1.85553	0.968659	ENSPTRT00000008314	383	4	4	2	45	2.95389	0	0	0	0	0.353339	2.23607	ENSMMUT00000025452	383	3	4	3	TRUE	TRUE
ENSMMUT00000025452_141	ENSPTRT00000008314_141	ENST00000265909_141	chr11:130916369:-	57	2.52198	11.1677	11.1623	1514.87	6025.53	12.1329	13.3098	1.90806	ENST00000265909	141	1	2	3	57	7.36604	12.7708	68.5701	1.30036	0	7.77708	1.59574	ENSPTRT00000008314	141	1	2	4	168	5.4346	5.06772	5.98693	6.44503	5.59632	6.14328	0.0926579	ENSMMUT00000025452	141	1	2	5	TRUE	TRUE
ENSMMUT00000025452_1	ENSPTRT00000008314_1	ENST00000265909_1	chr11:130916509:-	144	5.00868	6.17447	0	1066.31	1301.75	15.06	9.07829	1.53515	ENST00000265909	1	2	1	4	144	7.37519	36.4985	11.1366	0	0	7.18887	1.36741	ENSPTRT00000008314	1	2	1	5	144	1.78588	0	0	0	0	0.0374315	2.23607	ENSMMUT00000025452	1	4	1	6	TRUE	TRUE
ENSMMUT00000046336_425	ENSPTRT00000002106_406	ENST00000369604_361	chr1:113759126:-	60	2.80178	0.450078	10.5834	5.26514	7.81242	4.48062	4.03241	0.687161	ENST00000369604	361	2	2	1	60	4.89463	5.7257	1.87306	2.02229	0	2.70648	0.811447	ENSPTRT00000002106	406	2	2	2	60	13.2717	0.831439	2.64317	0.375095	6.90976	3.2847	1.12143	ENSMMUT00000046336	425	2	2	2	TRUE	TRUE
ENSMMUT00000046336_385	ENSPTRT00000002106_366	ENST00000369604_321	chr1:113759166:-	144	12.2007	1.10121	7.73099	31.0746	31.6992	7.39395	8.61755	0.857137	ENST00000369604	321	1	1	2	144	8.42388	13.2021	6.62904	2.25249	2.86275	6.7326	0.669053	ENSPTRT00000002106	366	1	1	3	144	10.0829	12.2651	7.72878	12.1215	16.75	11.7173	0.282418	ENSMMUT00000046336	385	1	1	3	TRUE	TRUE
ENSMMUT00000027430_204	ENSPTRT00000002113_346	ENST00000369563_356	chr1:113905496:+	75	66.6279	9.66904	16.2168	86.1803	5994.86	14.4812	29.6703	2.35793	ENST00000369563	356	1	2	1	75	5.82824	25.3398	15.8326	20.874	1.7338	12.5587	0.715071	ENSPTRT00000002113	346	1	2	1	75	19.8764	8.40578	7.94411	6.3781	9.25464	9.049	0.522099	ENSMMUT00000027430	204	1	1	1	TRUE	TRUE
ENSMMUT00000076806_637	ENSPTRT00000002130_638	ENST00000369535_37	chr1:114716735:-	95	2.3473	2.34622	3.26347	8.15839	9.26954	3.10211	3.68514	0.656112	ENST00000369535	37	1	1	1	95	3.23772	0.937165	1.78847	1.9524	1.05838	1.61879	0.51252	ENSPTRT00000002130	638	3	9	1	95	2.91131	1.60537	1.69366	2.29813	0.706069	1.7907	0.447441	ENSMMUT00000076806	637	3	9	1	TRUE	TRUE
ENSMMUT00000002788_123	ENSPTRT00000087460_133	ENST00000610726_128	chr1:114750206:-	33	0.244393	0.069089	0	0.677559	1.17996	0.129058	0.304895	1.1959	ENST00000610726	128	2	2	1	33	0.159202	0.0229306	0.147834	0.176029	0.0299154	0.110918	0.694546	ENSPTRT00000087460	133	2	2	1	33	0.0746251	0.190858	0.281086	0.0467305	0.0561731	0.126566	0.78869	ENSMMUT00000002788	123	2	2	1	TRUE	TRUE
ENSMMUT00000002788_86	ENSPTRT00000087460_96	ENST00000610726_91	chr1:114757960:-	27	2.92274	0.956524	2.34383	9.16825	3.04509	0.598399	1.73337	0.979196	ENST00000610726	91	1	1	2	27	1.15079	1.11978	1.11449	0.4444	0.815047	0.874553	0.326449	ENSPTRT00000087460	96	1	1	2	27	0.420864	0.587804	0.536203	0.741449	0.493048	0.57028	0.216661	ENSMMUT00000002788	86	1	1	2	TRUE	TRUE
ENSMMUT00000046304_3	ENSPTRT00000002133_10	ENST00000369528_2	chr1:114780684:-	42	0	2.52124	0	4.94601	0	1.63164	1.34806	1.30837	ENST00000369528	2	1	1	1	42	0	4.77142	0	2.70722	0	2.43829	1.45364	ENSPTRT00000002133	10	1	1	1	42	1.81923	4.98301	0	0	0	1.51536	1.59719	ENSMMUT00000046304	3	1	1	1	TRUE	TRUE
ENSMMUT00000000630_714	ENSPTRT00000002143_1726	ENST00000369500_57	chr1:116112407:+	96	26.2374	5.81487	0	29.5966	391.225	7.59211	11.6252	2.01338	ENST00000369500	57	2	1	3	96	0	0	0	0	0	0	0	ENSPTRT00000002143	1726	0	22	3	96	1.79687	0	0	0	0	1.4339	2.23607	ENSMMUT00000000630	714	2	7	3	TRUE	TRUE
ENSMMUT00000000630_721	ENSPTRT00000002143_1733	ENST00000369500_64	chr1:116112414:+	33	1183.12	2.01729	0	1.76613	0	238.405	3.79208	1.9906	ENST00000369500	64	3	2	2	33	0	0	0	0	0	0	0	ENSPTRT00000002143	1733	0	23	2	33	184.966	0	0	0	0	33.5286	2.23607	ENSMMUT00000000630	721	1	8	2	TRUE	TRUE
ENSMMUT00000000630_750	ENSPTRT00000002143_1762	ENST00000369500_93	chr1:116112443:+	60	15.4621	5.75463	0	2078.36	625.36	6.36045	12.3759	1.82942	ENST00000369500	93	1	3	1	60	0	0	0	0	0	0	0	ENSPTRT00000002143	1762	0	24	1	60	0	0	0	0	0	0	0	ENSMMUT00000000630	750	9	9	1	TRUE	TRUE
ENSMMUT00000044011_87	ENSPTRT00000081240_92	ENST00000540430_97	chr11:18396362:+	57	0	0	0	0	0	0	0	0	ENST00000540430	97	2	1	2	57	0	0	0	0	0	0	0	ENSPTRT00000081240	92	0	1	2	57	0	0	0	0	0	0	0	ENSMMUT00000044011	87	0	1	1	TRUE	TRUE
ENSMMUT00000015181_602	ENSPTRT00000006481_570	ENST00000250024_492	chr11:19240137:-	16	0	0.449097	0	2997.19	3.92368	1.02607	1.3869	2.44421	ENST00000250024	492	4	4	1	16	0	0	0	0	0	0	0	ENSPTRT00000006481	570	4	4	1	16	1.36463	0	0	0	0	0.13388	2.23607	ENSMMUT00000015181	602	7	9	1	TRUE	TRUE
ENSMMUT00000015181_598	ENSPTRT00000006481_566	ENST00000250024_488	chr11:19240141:-	20	0	0.449186	0	2397.95	9.79064	1.53844	1.94072	2.43514	ENST00000250024	488	3	3	2	20	0	0	0	0	0	0	0	ENSPTRT00000006481	566	3	3	2	20	1.36458	0	0	0	0	0.126408	2.23607	ENSMMUT00000015181	598	8	8	2	TRUE	TRUE
ENSMMUT00000015181_418	ENSPTRT00000006481_386	ENST00000250024_308	chr11:19240638:-	99	8.04021	5.76131	0.72661	12.3266	12.7085	32.8322	7.89377	0.920099	ENST00000250024	308	2	2	3	99	17.4142	3.65515	1.1237	3.32965	0	3.1739	1.38068	ENSPTRT00000006481	386	2	2	3	99	2.72605	2.06751	1.29311	2.29718	0.890658	1.76988	0.403891	ENSMMUT00000015181	418	3	7	3	TRUE	TRUE
ENSMMUT00000015181_296	ENSPTRT00000006481_264	ENST00000250024_186	chr11:19240760:-	189	17.7288	9.70496	8.09902	53.0331	13.1117	15.1722	11.9382	0.863216	ENST00000250024	186	1	1	4	189	8.71207	3.59942	3.35899	7.42184	0	4.23798	0.754506	ENSPTRT00000006481	264	1	1	4	252	5.55166	13.0325	9.72046	2.8851	1.13952	3.51138	0.756647	ENSMMUT00000015181	296	1	4	6	TRUE	TRUE
ENSMMUT00000032989_144	ENSPTRT00000000354_353	ENST00000235329_273	chr1:11982069:+	24	0.561385	0.621459	0	0	0	0.721542	0.488642	1.10724	ENST00000235329	273	2	2	3	24	0	0	0.156366	1.18264	2.02514	0.405913	1.34192	ENSPTRT00000000354	353	2	2	3	66	0.140639	0	0	0.64702	0	0.155174	1.77949	ENSMMUT00000032989	144	4	3	3	TRUE	TRUE
ENSMMUT00000032989_150	ENSPTRT00000000354_359	ENST00000235329_279	chr1:11982075:+	18	0	0.673199	0	0	0	0.619273	0.357452	1.55121	ENST00000235329	279	4	3	2	18	0	0	0	0.338918	2.02524	0.231514	1.86143	ENSPTRT00000000354	359	4	3	2	18	0.791268	0.767198	0	0.840957	0.53691	0.599763	0.593403	ENSMMUT00000032989	150	2	4	2	TRUE	TRUE
ENSMMUT00000032989_153	ENSPTRT00000000354_362	ENST00000235329_282	chr1:11982078:+	15	0	0.673184	0	0	0	0.6907	0.369189	1.54938	ENST00000235329	282	3	4	1	15	0	0	0	0.338897	2.14439	0.243534	1.87801	ENSPTRT00000000354	362	3	4	1	15	0.827219	0.767195	0	0.85964	0.548572	0.615211	0.594388	ENSMMUT00000032989	153	1	5	1	TRUE	TRUE
ENSMMUT00000030197_84	ENSPTRT00000043064_105	ENST00000620676_106	chr1:12234205:+	24	1301.34	0	0	400.492	2082.2	12.734	10.892	1.37531	ENST00000620676	106	1	1	3	24	0	0	781.278	4445.72	0	6.67615	1.84686	ENSPTRT00000043064	105	1	1	3	24	3795.29	0	6.7084	0	1.48344	5.94881	2.23005	ENSMMUT00000030197	84	1	2	3	TRUE	TRUE
ENSMMUT00000030197_104	ENSPTRT00000043064_125	ENST00000620676_126	chr1:12234225:+	18	0	0	0	0	0	0	0	0	ENST00000620676	126	3	2	2	18	0	0	0	8.64923	0	1.46341	2.23607	ENSPTRT00000043064	125	2	2	2	18	2699.17	0	0	0	0	0.91818	2.23607	ENSMMUT00000030197	104	3	3	2	TRUE	TRUE
ENSMMUT00000030197_111	ENSPTRT00000043064_132	ENST00000620676_133	chr1:12234232:+	33	0	0	0	0	0	1.2811	0.309888	2.44949	ENST00000620676	133	2	3	1	33	0	0	0	8.62952	0	1.46227	2.23607	ENSPTRT00000043064	132	3	3	1	35	14.4177	0	0	0	0	0.62907	2.23607	ENSMMUT00000030197	111	4	4	1	TRUE	TRUE
ENSMMUT00000044752_25	ENSPTRT00000090198_1	ENST00000182290_7	chr11:2302019:+	51	0	0	0	0	0	0	0	0	ENST00000182290	7	2	1	2	51	0	0	0	0	0	0	0	ENSPTRT00000090198	1	0	1	2	63	0	0	0	0	0	0	0	ENSMMUT00000044752	25	0	1	2	TRUE	TRUE
ENSMMUT00000044752_51	ENSPTRT00000090198_27	ENST00000182290_33	chr11:2302045:+	108	6.64588	0	0	0	0	0	3.55062	2.44949	ENST00000182290	33	1	2	1	108	0	0	0	0	0	0	0	ENSPTRT00000090198	27	0	2	1	115	0	0	0	0	0	0	0	ENSMMUT00000044752	51	0	2	1	TRUE	TRUE
ENSMMUT00000019338_2357	ENSPTRT00000006089_2371	ENST00000333256_22	chr11:2400771:+	24	27.1923	12.7166	50.414	53.8923	46.7981	17.7115	25.8993	0.512587	ENST00000333256	22	1	1	2	24	2.58792	8.02373	10.1839	6.70901	12.698	8.28108	0.47273	ENSPTRT00000006089	2371	2	20	2	24	3.43643	8.41674	10.5332	0	0	3.54182	1.07909	ENSMMUT00000019338	2357	1	24	2	TRUE	TRUE
ENSMMUT00000019338_2406	ENSPTRT00000006089_2420	ENST00000333256_71	chr11:2402315:+	24	4.73702	3.15986	5.33868	2.45089	3.93659	5.12643	4.09209	0.278953	ENST00000333256	71	2	2	1	24	0	2.30129	3.4913	1.00669	2.02514	2.10729	0.750927	ENSPTRT00000006089	2420	3	21	1	24	0.0794099	3.98807	0	0	5.24977	1.44452	1.37103	ENSMMUT00000019338	2406	3	25	1	TRUE	TRUE
ENSMMUT00000019113_135	ENSPTRT00000006523_235	ENST00000263181_88	chr11:28108069:-	52	0	0	1.5064	2.52553	2.36083	0.1354	0.438912	1.09805	ENST00000263181	88	1	1	1	52	0	0	0	0	0	0	0	ENSPTRT00000006523	235	0	3	1	52	0	0	0	0	0	0	0	ENSMMUT00000019113	135	0	3	1	TRUE	TRUE
ENSMMUT00000024739_257	ENSPTRT00000006531_123	ENST00000282032_112	chr11:30330898:+	9	0.336765	1.17249	0	0	0.0758401	0.665099	0.47702	1.24632	ENST00000282032	112	1	1	1	9	0	0.750598	1.1246	0.232398	0	0.510334	1.18247	ENSPTRT00000006531	123	1	1	1	9	0	0.374045	0	0	0.907054	0.268922	1.55433	ENSMMUT00000024739	257	1	1	1	TRUE	TRUE
ENSMMUT00000009574_72	ENSPTRT00000006539_74	ENST00000465995_42	chr11:31369901:+	6	0	3.14066	0	0.5061	0.725529	0.122236	0.669085	1.61242	ENST00000465995	42	1	1	2	6	0	0	0	0.696962	0	0.154086	2.23607	ENSPTRT00000006539	74	1	1	2	6	0.535286	0	0	0	0	0.091055	2.23607	ENSMMUT00000009574	72	2	1	2	TRUE	TRUE
ENSMMUT00000009574_113	ENSPTRT00000006539_115	ENST00000465995_83	chr11:31370745:+	4	0	0	0	1.77052	0	0	0.174618	2.44949	ENST00000465995	83	2	2	1	4	0	0	0	0	0	0	0	ENSPTRT00000006539	115	2	2	1	4	0	0	0	0	1.64046	0.666582	2.23607	ENSMMUT00000009574	113	1	2	1	TRUE	TRUE
ENSMMUT00000044060_1535	ENSPTRT00000006541_611	ENST00000278200_172	chr11:31463301:-	21	1.40253	0.505306	0	0	0	0	0.382107	1.78779	ENST00000278200	172	1	1	1	21	0	0	0	0	0	0	0	ENSPTRT00000006541	611	13	13	1	21	0.121689	0.083425	0	0	0	0.0396263	1.40846	ENSMMUT00000044060	1535	2	32	1	TRUE	TRUE
ENSMMUT00000019474_315	ENSPTRT00000083683_454	ENST00000343938_305	chr1:1326839:+	21	0	0	0	7.03639	3.93358	4.10012	1.30788	1.18031	ENST00000343938	305	1	1	1	21	0	0	1.40556	0	0	0.686891	2.23607	ENSPTRT00000083683	454	1	2	1	21	8.16656	0	0	0	0	0.420094	2.23607	ENSMMUT00000019474	315	1	1	1	TRUE	TRUE
ENSMMUT00000059300_224	ENSPTRT00000102155_1072	ENST00000257836_230	chr11:32830156:+	27	0	0	0	0	0	0.466836	0.157725	2.44949	ENST00000257836	230	1	1	1	27	0	0	0	0	0	0	0	ENSPTRT00000102155	1072	5	14	1	27	3.62897	0	0	0	0	0.374414	2.23607	ENSMMUT00000059300	224	1	1	1	TRUE	TRUE
ENSMMUT00000023505_76	ENSPTRT00000103538_76	ENST00000393045_82	chr1:145859000:-	10	0	0	0	0	0	0	0	0	ENST00000393045	82	0	1	1	10	0	0	0	0	0	0	0	ENSPTRT00000103538	76	0	1	1	10	0	0	0	0	0	0	0	ENSMMUT00000023505	76	0	1	1	TRUE	TRUE
ENSMMUT00000031912_97	ENSPTRT00000006155_262	ENST00000300747_234	chr11:4605533:-	9	2.24346	0	0	0	0	0	0.398625	2.44949	ENST00000300747	234	1	1	1	9	0	0	0	3.25063	0	0.61065	2.23607	ENSPTRT00000006155	262	1	1	1	9	0	0	0	0	0	0	0	ENSMMUT00000031912	97	0	1	1	TRUE	TRUE
ENSMMUT00000026104_192	ENSPTRT00000006668_192	ENST00000621158_158	chr11:46277818:+	51	0	1302.65	0	24.5692	11.729	3226.91	39.4456	1.72704	ENST00000621158	158	1	1	2	51	1160.37	11750.9	3.33806	616.187	0	250.027	1.87691	ENSPTRT00000006668	192	1	1	2	51	0	0	0	0	0	0	0	ENSMMUT00000026104	192	0	1	2	TRUE	TRUE
ENSMMUT00000026104_243	ENSPTRT00000006668_243	ENST00000621158_209	chr11:46277869:+	45	0	0	0	6.98375	0	0	2.00425	2.44949	ENST00000621158	209	2	2	1	45	0	0	0	0	0	0	0	ENSPTRT00000006668	243	2	2	1	45	0	0	0	0	0	0	0	ENSMMUT00000026104	243	0	2	1	TRUE	TRUE
ENSMMUT00000016142_1241	ENSPTRT00000099378_594	ENST00000458649_331	chr11:46548469:-	15	5.97825	0	0	4475.32	16.3859	1.79528	3.87506	2.43372	ENST00000458649	331	4	12	1	15	0	0	0.703056	0.619642	0	0.203686	1.37384	ENSPTRT00000099378	594	2	6	1	15	2.54634	0	0	0	0	0.201138	2.23607	ENSMMUT00000016142	1241	2	19	1	TRUE	TRUE
ENSMMUT00000016142_1216	ENSPTRT00000099378_569	ENST00000458649_306	chr11:46548494:-	96	4.02346	0.21401	0	44.4984	21.9948	2.74456	4.76634	1.45524	ENST00000458649	306	2	11	2	96	1.0006	0	0.869198	1.94985	0	0.619959	1.06359	ENSPTRT00000099378	569	1	5	2	96	4.40552	3.0993	3.8828	3.69595	0	2.59566	0.580046	ENSMMUT00000016142	1216	1	18	2	TRUE	TRUE
ENSMMUT00000027635_566	ENSPTRT00000099268_575	ENST00000528494_252	chr11:46617851:+	53	1.19232	0.594151	0	4.95051	8.08252	1.35789	1.73558	1.17092	ENST00000528494	252	1	1	1	53	2.47949	2.86822	3.63602	0.682706	0.156334	1.67584	0.754501	ENSPTRT00000099268	575	4	5	1	53	0.227987	2.06799	1.04611	2.22796	3.11113	1.90986	0.643509	ENSMMUT00000027635	566	4	4	1	TRUE	TRUE
ENSMMUT00000027636_182	ENSPTRT00000006682_163	ENST00000311764_112	chr11:46700929:+	54	0	0	0	0	1041.6	146.081	27.5964	2.10872	ENST00000311764	112	1	1	1	54	20.8224	0	0	10.7956	0	9.63698	1.47962	ENSPTRT00000006682	163	1	2	1	119	1.2107	7.26508	0	0	6.99953	3.18924	1.20181	ENSMMUT00000027636	182	1	2	1	TRUE	TRUE
ENSMMUT00000046160_345	ENSPTRT00000002274_373	ENST00000583509_359	chr1:147670166:-	45	0	0	0	13.9511	40.0916	5.0705	9.51228	1.60183	ENST00000583509	359	1	2	1	45	44.4779	8.73667	14.1858	1.62538	6.29368	8.59981	1.13218	ENSPTRT00000002274	373	1	2	1	45	9.97865	5.69116	0	10.7131	7.4131	6.46771	0.633124	ENSMMUT00000046160	345	1	1	1	TRUE	TRUE
ENSMMUT00000046137_1731	ENSPTRT00000078727_1669	ENST00000439741_219	chr1:149936661:-	14	0	0	0	0	0	0	0	0	ENST00000439741	219	0	2	1	14	0	0	0	0	0	0	0	ENSPTRT00000078727	1669	0	20	1	14	0	0	0	0	0	0	0	ENSMMUT00000046137	1731	0	19	1	TRUE	TRUE
ENSMMUT00000046137_1602	ENSPTRT00000078727_1540	ENST00000439741_90	chr1:149936790:-	114	0	0	0	0	0	0	0	0	ENST00000439741	90	0	1	2	114	0	0	0	0	0	0	0	ENSPTRT00000078727	1540	0	19	2	114	0	0	0	0	0	0	0	ENSMMUT00000046137	1602	0	18	2	TRUE	TRUE
ENSMMUT00000046131_23	ENSPTRT00000002309_535	ENST00000581312_302	chr1:149977554:-	27	0	0	0	1066.31	0	0.855506	0.719133	2.44713	ENST00000581312	302	2	2	1	27	0	0	0	0	7.80487	1.20555	2.23607	ENSPTRT00000002309	535	1	11	2	27	2.72831	0	0	0	0	0.574174	2.23607	ENSMMUT00000046131	23	1	2	2	TRUE	TRUE
ENSMMUT00000019215_14	ENSPTRT00000002312_120	ENST00000369124_92	chr1:150150007:+	78	13.4273	8.60137	10.4332	11.7537	3.41709	6.48032	7.32843	0.40562	ENST00000369124	92	1	1	2	78	3.25083	1.88021	3.31325	4.09328	0	2.84921	0.642971	ENSPTRT00000002312	120	1	1	2	78	2.12201	3.80539	1.83102	4.94666	1.97721	3.03248	0.469455	ENSMMUT00000019215	14	1	1	1	TRUE	TRUE
ENSMMUT00000011059_416	ENSPTRT00000002369_399	ENST00000368908_364	chr1:151165539:-	6	0	0	0	0	0	0	0	0	ENST00000368908	364	4	4	2	6	0	0	0	0	0	0	0	ENSPTRT00000002369	399	5	5	2	45	3.62779	1.11974	7.09347	11.4675	1.66926	3.13943	0.862417	ENSMMUT00000011059	416	1	6	1	TRUE	TRUE
ENSMMUT00000011059_326	ENSPTRT00000002369_309	ENST00000368908_274	chr1:151165629:-	57	0.450708	0	0	337.415	0	1.026	0.546961	2.43669	ENST00000368908	274	2	3	3	57	0	0	0	0	0	0	0	ENSPTRT00000002369	309	4	4	3	57	0	0	0	0	0	0	0	ENSMMUT00000011059	326	5	5	2	TRUE	TRUE
ENSMMUT00000011059_173	ENSPTRT00000002369_156	ENST00000368908_121	chr1:151165782:-	69	0	0	0	0	0	0	0	0	ENST00000368908	121	3	2	4	105	0	0	0	0	0	0	0	ENSPTRT00000002369	156	3	3	4	105	0.0840288	0	0	0	0	0.0116029	2.23607	ENSMMUT00000011059	173	4	4	3	TRUE	TRUE
ENSMMUT00000011059_138	ENSPTRT00000002369_121	ENST00000368908_86	chr1:151165817:-	27	1.12221	0.917913	0	0	9.7714	1.42472	1.34975	1.70109	ENST00000368908	86	1	1	5	27	0	0	0	6.49196	0	0.687056	2.23607	ENSPTRT00000002369	121	2	2	5	27	0	1.943	0	0	0	0.450231	2.23607	ENSMMUT00000011059	138	3	3	4	TRUE	TRUE
ENSMMUT00000015356_199	ENSPTRT00000058709_1731	ENST00000368708_204	chr1:153565662:-	36	0	0	0	0	0	0	0	0	ENST00000368708	204	3	3	3	36	0	0	0	0	0	0	0	ENSPTRT00000058709	1731	0	28	2	36	0	0	0	0	0	0	0	ENSMMUT00000015356	199	0	3	1	TRUE	TRUE
ENSMMUT00000015356_189	ENSPTRT00000058709_1721	ENST00000368708_194	chr1:153565672:-	66	0	0	0	0	0	0	0	0	ENST00000368708	194	2	2	4	66	0	0	0	0	0	0	0	ENSPTRT00000058709	1721	0	27	3	66	0	0	0	0	0	0	0	ENSMMUT00000015356	189	0	2	2	TRUE	TRUE
ENSMMUT00000053554_517	ENSPTRT00000049990_1509	ENST00000368702_199	chr1:153615933:-	33	0	671.545	0	0	0	0	1.51752	2.44949	ENST00000368702	199	1	1	1	33	0	16.818	0	0	0	9.82999	2.23607	ENSPTRT00000049990	1509	1	16	1	33	0	0	0	0	0	0	0	ENSMMUT00000053554	517	0	5	1	TRUE	TRUE
ENSMMUT00000027376_10	ENSPTRT00000002493_10	ENST00000318967_27	chr1:153728076:+	54	5.8645	0.577189	0	6.48383	2.80877	2.63199	3.02294	0.868789	ENST00000318967	27	1	1	1	54	4.01878	0.569745	6.17145	0	5.19873	2.14284	0.867315	ENSPTRT00000002493	10	1	1	1	54	1.9148	0.941957	0	9.38437	2.00766	2.50856	1.3135	ENSMMUT00000027376	10	1	1	1	TRUE	TRUE
ENSMMUT00000009211_156	ENSPTRT00000002556_373	ENST00000368457_145	chr1:154961638:-	45	70.9198	10.2403	19.5534	69.2733	116.514	14.9955	22.5658	0.842718	ENST00000368457	145	1	1	1	45	15.8758	49.9157	24.942	10.8158	4.91156	18.6386	0.826929	ENSPTRT00000002556	373	1	2	1	45	10.1213	10.8502	10.1872	5.03098	14.6057	11.3214	0.335795	ENSMMUT00000009211	156	1	1	2	TRUE	TRUE
ENSMMUT00000009214_1245	ENSPTRT00000058703_28	ENST00000448116_28	chr1:154970720:-	27	0	0	0	356.104	0	0.513908	1.01732	2.44526	ENST00000448116	28	1	1	1	27	0	0	0	0	0	0	0	ENSPTRT00000058703	28	0	1	1	27	450.694	0	0	4.20004	0	1.3341	2.21035	ENSMMUT00000009214	1245	1	16	1	TRUE	TRUE
ENSMMUT00000062558_150	ENSPTRT00000002601_329	ENST00000327247_220	chr1:155241126:-	14	0.897895	9.4092	0	2.35873	2676.83	3.41663	3.55714	2.43195	ENST00000327247	220	1	1	1	14	0	0	2.54871	0.667279	0	1.33788	1.71597	ENSPTRT00000002601	329	1	3	1	15	0	0	0	0	0	0	0	ENSMMUT00000062558	150	2	3	8	TRUE	TRUE
ENSMMUT00000057844_603	ENSPTRT00000002604_552	ENST00000361361_552	chr1:155254932:-	55	1.9218	0	0	0	3.60271	1.28199	1.10499	1.28319	ENST00000361361	552	4	4	1	55	2.00027	0.566886	3.23099	0.586797	2.74688	1.22421	0.669102	ENSPTRT00000002604	552	4	4	1	55	0	2.65361	0	0	29.2439	6.88668	2.01162	ENSMMUT00000057844	603	2	4	1	TRUE	TRUE
ENSMMUT00000057844_518	ENSPTRT00000002604_467	ENST00000361361_467	chr1:155255017:-	36	11.1875	1.68203	0	2.35506	5.5708	2.92846	3.87174	1.00747	ENST00000361361	467	3	3	2	36	10.4999	0.672048	13.5853	1.21722	8.70145	4.19443	0.828237	ENSPTRT00000002604	467	1	3	2	36	0	2405.75	0	0	0	24.1997	2.23607	ENSMMUT00000057844	518	1	3	2	TRUE	TRUE
ENSMMUT00000057844_381	ENSPTRT00000002604_330	ENST00000361361_330	chr1:155255154:-	277	4.84612	1.80278	9.59621	4.77885	6.57403	3.66878	4.34778	0.510621	ENST00000361361	330	2	2	3	277	5.91554	1.41947	10.8695	1.35261	13.7243	3.91465	0.835825	ENSPTRT00000002604	330	2	2	3	277	0	7.89551	0	0	9.66772	6.77637	1.38088	ENSMMUT00000057844	381	3	2	3	TRUE	TRUE
ENSMMUT00000057844_376	ENSPTRT00000002604_325	ENST00000361361_325	chr1:155255159:-	9	26.912	5.65106	50.0036	21.216	25.5302	6.40912	17.1112	0.720864	ENST00000361361	325	1	1	4	9	8.44483	1.8541	8.20779	0.55272	9.28189	3.55173	0.727046	ENSPTRT00000002604	325	3	1	4	9	0	0	0	0	0	0	0	ENSMMUT00000057844	376	4	1	4	TRUE	TRUE
ENSMMUT00000023462_409	ENSPTRT00000089501_2744	ENST00000348159_349	chr1:156483372:-	15	0.481131	0.897495	0	17.6619	3.14973	2.0306	1.762	1.67737	ENST00000348159	349	2	2	1	15	0	0	1.27129	1.38764	2.15182	0.70857	0.978221	ENSPTRT00000089501	2744	13	38	1	15	0.321321	3.29235	3.06827	0	1.88238	1.65622	0.88689	ENSMMUT00000023462	409	1	2	1	TRUE	TRUE
ENSMMUT00000023462_380	ENSPTRT00000089501_2715	ENST00000348159_320	chr1:156483401:-	9	0.690686	0.425171	13.0559	3.5404	2.70707	1.39917	1.97494	1.31075	ENST00000348159	320	1	1	2	9	0.921608	0.83573	0.220555	0.942724	0	0.659712	0.755586	ENSPTRT00000089501	2715	14	37	2	9	0.520006	0	0	1.29373	0.312522	0.47569	1.25407	ENSMMUT00000023462	380	2	1	2	TRUE	TRUE
ENSMMUT00000024031_31	ENSPTRT00000002699_608	ENST00000329117_10	chr1:156642126:+	150	4.01414	0	0	0.357719	0	0	0.925673	2.21769	ENST00000329117	10	1	1	1	150	0	0	0	0	0	0	0	ENSPTRT00000002699	608	0	3	1	81	0	0	0	0	0	0	0	ENSMMUT00000024031	31	0	1	1	TRUE	TRUE
ENSMMUT00000000053_174	ENSPTRT00000002705_179	ENST00000313146_714	chr1:156727722:-	30	0	0.788087	13.2718	1.51701	1.64001	0.0919343	1.65313	1.77993	ENST00000313146	714	5	16	1	3	0	0	0	0	0	0	0	ENSPTRT00000002705	179	0	2	1	30	0.237664	0	0	0	0.723161	0.210591	1.63489	ENSMMUT00000000053	174	1	2	1	TRUE	TRUE
ENSMMUT00000000053_147	ENSPTRT00000002705_152	ENST00000313146_687	chr1:156727749:-	57	0.345588	0.881206	1.53599	3.2852	3.73905	0.641496	1.32562	0.826339	ENST00000313146	687	6	15	2	3	0	0	0	0	0	0	0	ENSPTRT00000002705	152	0	1	2	57	0.50988	0	0	0	0.600157	0.200257	1.37683	ENSMMUT00000000053	147	2	1	2	TRUE	TRUE
ENSMMUT00000045650_29	ENSPTRT00000002706_173	ENST00000368216_175	chr1:156728643:+	231	0.562042	0.164681	0	0.918452	1.848	2.26064	1.00059	0.955096	ENST00000368216	175	1	1	1	231	0	1.25048	0.750133	1.27815	4.9201	1.28109	1.16203	ENSPTRT00000002706	173	1	1	1	237	0.134656	0.949912	1.71581	2.42695	1.64797	1.39064	0.63153	ENSMMUT00000045650	29	2	1	2	TRUE	TRUE
ENSMMUT00000015279_136	ENSPTRT00000002710_136	ENST00000271526_83	chr1:156767617:+	21	8.81011	2.46775	2.5718	5.99051	50.6328	7.81564	11.0377	1.42535	ENST00000271526	83	1	1	1	21	1.47447	2.13591	7.09677	10.2469	0	3.71674	1.0283	ENSPTRT00000002710	136	1	1	1	27	10.0053	8.4692	11.3954	9.13754	6.18221	8.96253	0.214135	ENSMMUT00000015279	136	1	1	1	TRUE	TRUE
ENSMMUT00000017438_499	ENSPTRT00000077751_1493	ENST00000368194_858	chr1:157044513:-	48	8.95068	3.58488	16.2891	200.746	651.375	1.92272	5.44423	1.75922	ENST00000368194	858	1	6	1	48	0	0	391.139	1.2044	0	0.947206	2.2275	ENSPTRT00000077751	1493	2	6	1	48	380.429	0	0	2496.33	0	1.49053	1.88827	ENSMMUT00000017438	499	1	3	1	TRUE	TRUE
ENSMMUT00000017438_279	ENSPTRT00000077751_1263	ENST00000368194_635	chr1:157044736:-	27	0	0	0	0	0	0	0	0	ENST00000368194	635	6	5	2	27	0	0	0	0	0	0	0	ENSPTRT00000077751	1263	5	5	2	27	0	0	0	0	0	0	0	ENSMMUT00000017438	279	2	2	2	TRUE	TRUE
ENSMMUT00000017438_72	ENSPTRT00000077751_1055	ENST00000368194_426	chr1:157044945:-	135	9.92704	0	0	8.66295	0	0	1.29254	1.55456	ENST00000368194	426	2	4	3	120	0	0	0	0	0	0	0	ENSPTRT00000077751	1055	4	4	3	159	0	0	0	0	0	0	0	ENSMMUT00000017438	72	3	1	3	TRUE	TRUE
ENSMMUT00000076628_149	ENSPTRT00000095701_209	ENST00000368192_18	chr1:157138378:-	76	0	0.176587	0	127.156	5.84953	0.241081	0.542706	2.31373	ENST00000368192	18	1	1	1	76	1.58556	0.293235	0.191322	0	0	0.359945	1.611	ENSPTRT00000095701	209	1	3	1	76	0	0	0	0	0	0	0	ENSMMUT00000076628	149	2	2	1	TRUE	TRUE
ENSMMUT00000044189_209	ENSPTRT00000046321_177	ENST00000532437_308	chr11:57321890:-	5	0	0	0	0	0	0	0	0	ENST00000532437	308	0	2	1	5	0	0	0	0	0	0	0	ENSPTRT00000046321	177	0	1	1	5	0	0	0	0	0	0	0	ENSMMUT00000044189	209	0	1	1	TRUE	TRUE
ENSMMUT00000012540_320	ENSPTRT00000084441_30	ENST00000361835_41	chr1:157552475:-	69	4.62291	12.4117	9.20267	12.8195	11.4924	2.80041	6.50043	0.477164	ENST00000361835	41	2	2	1	69	17.4656	14.2987	13.409	4.28545	0	11.2855	0.74706	ENSPTRT00000084441	30	1	1	1	84	2.54695	1.54913	1.56986	1.78056	0.848234	1.66096	0.366736	ENSMMUT00000012540	320	1	5	1	TRUE	TRUE
ENSMMUT00000060115_87	ENSPTRT00000005959_393	ENST00000264555_135	chr11:581503:+	10	0	2.15367	0	11.7921	25.574	3.52617	4.51076	1.39571	ENST00000264555	135	1	1	1	10	0	0	0.613536	3.00167	0	0.697598	1.79962	ENSPTRT00000005959	393	1	1	1	10	1.27382	0	0	1.31621	0	0.422524	1.36961	ENSMMUT00000060115	87	1	1	1	TRUE	TRUE
ENSMMUT00000020386_298	ENSPTRT00000006946_274	ENST00000227525_15	chr11:60914172:+	15	5.04583	1.46837	9.7879	15.896	4.26407	5.12795	4.9278	0.742062	ENST00000227525	15	1	1	1	30	5.94828	1.64147	0.102973	3.97	28.1108	2.49512	1.44388	ENSPTRT00000006946	274	2	4	1	33	3.63671	0	0	4.88896	0	1.16534	1.39371	ENSMMUT00000020386	298	4	4	1	TRUE	TRUE
ENSMMUT00000002839_648	ENSPTRT00000002862_558	ENST00000368021_186	chr1:161043295:-	20	0.303423	2.45785	1.01568	0.774778	1.51453	4.7758	1.65397	0.901731	ENST00000368021	186	2	4	1	20	1.96442	2.74404	1.10068	2.55506	0	1.87662	0.67741	ENSPTRT00000002862	558	1	7	1	20	2.19863	2.65913	0	1.12123	0.517829	1.08128	0.85946	ENSMMUT00000002839	648	1	7	2	TRUE	TRUE
ENSMMUT00000045511_217	ENSPTRT00000002876_196	ENST00000622395_663	chr1:161176463:-	24	0.641383	0	0	4.86543	1.26578	4.05963	1.2055	1.17788	ENST00000622395	663	6	9	1	24	0	0	0.389462	0	0	0.144849	2.23607	ENSPTRT00000002876	196	5	5	1	24	0.227707	1.38508	1.86946	0	0	0.735301	1.25174	ENSMMUT00000045511	217	5	5	1	TRUE	TRUE
ENSMMUT00000045511_175	ENSPTRT00000002876_154	ENST00000622395_621	chr1:161176505:-	66	0.418659	0.891685	0	5.02764	1.18134	3.16224	1.29031	1.08418	ENST00000622395	621	5	8	2	66	2.47105	0	0.44422	0.663908	2.71904	0.983677	0.988675	ENSPTRT00000002876	154	3	4	2	66	2.016	1.80045	3.16865	0	0.778696	1.63955	0.781974	ENSMMUT00000045511	175	2	4	2	TRUE	TRUE
ENSMMUT00000045511_131	ENSPTRT00000002876_110	ENST00000622395_577	chr1:161176549:-	45	0	0	2.49579	0.483337	0	0.488797	0.283106	1.67691	ENST00000622395	577	7	7	3	45	0	0	0	1.30904	0	0.351136	2.23607	ENSPTRT00000002876	110	4	3	3	45	0.966785	0.420108	0.747513	2.24212	0	0.798292	0.967092	ENSMMUT00000045511	131	4	3	3	TRUE	TRUE
ENSMMUT00000045511_50	ENSPTRT00000002876_29	ENST00000622395_496	chr1:161177473:-	30	1.08354	0.728331	0	2.27574	6.88299	6.40931	1.77209	1.03562	ENST00000622395	496	4	6	4	30	0.36252	2.60174	5.38427	0.767974	3.24007	2.39287	0.82038	ENSPTRT00000002876	29	2	2	4	30	2.15642	3.66934	0.646775	0	0.579311	1.24309	1.05896	ENSMMUT00000045511	50	3	2	4	TRUE	TRUE
ENSMMUT00000045511_38	ENSPTRT00000002876_17	ENST00000622395_484	chr1:161177485:-	42	3.1724	1.58883	5.47398	4.04418	6.87929	10.4349	3.64179	0.593069	ENST00000622395	484	1	5	5	42	5.1906	3.78397	7.45374	1.26474	6.88387	4.29665	0.50862	ENSPTRT00000002876	17	1	1	5	42	2.49311	3.669	2.29902	3.64307	1.91841	2.77114	0.28682	ENSMMUT00000045511	38	1	1	5	TRUE	TRUE
ENSMMUT00000025476_45	ENSPTRT00000002879_248	ENST00000367993_253	chr1:161202190:+	24	0	0	0	0	0	0	0	0	ENST00000367993	253	0	4	2	24	0	0	0	0	0	0	0	ENSPTRT00000002879	248	0	4	2	24	0	0	0	0	0	0	0	ENSMMUT00000025476	45	6	1	8	TRUE	TRUE
ENSMMUT00000025476_99	ENSPTRT00000002879_302	ENST00000367993_307	chr1:161202244:+	21	0	0	0	0	0	0	0	0	ENST00000367993	307	0	5	1	21	0	0	0	0	0	0	0	ENSPTRT00000002879	302	0	5	1	21	0	0	0	0	0	0	0	ENSMMUT00000025476	99	8	3	6	TRUE	TRUE
ENSMMUT00000025464_66	ENSPTRT00000002883_919	ENST00000367988_11	chr1:161226070:+	63	991.732	352.238	41.0384	2283.81	34.7748	7.66821	25.762	1.45157	ENST00000367988	11	2	1	7	63	0	9.8514	36.4421	38.6191	4.37793	11.5354	1.02534	ENSPTRT00000002883	919	1	14	7	63	25.0236	0	57.3087	36.2833	0	7.88743	1.03533	ENSMMUT00000025464	66	4	4	7	TRUE	TRUE
ENSMMUT00000025464_84	ENSPTRT00000002883_937	ENST00000367988_29	chr1:161226088:+	45	0	0	21.6488	1918.56	23.3139	5.96119	16.369	2.37369	ENST00000367988	29	3	2	6	45	0	0	7.78073	5.38653	0	1.21975	1.40653	ENSPTRT00000002883	937	7	15	6	45	14.378	0	14.0968	26.5388	0	3.34734	1.02066	ENSMMUT00000025464	84	5	5	6	TRUE	TRUE
ENSMMUT00000025464_117	ENSPTRT00000002883_970	ENST00000367988_62	chr1:161226121:+	12	0	0	0	0	0	0	0	0	ENST00000367988	62	6	3	5	84	0	0	0	0	0	0	0	ENSPTRT00000002883	970	19	16	5	12	0	0	0	0	0	0	0	ENSMMUT00000025464	117	9	6	5	TRUE	TRUE
ENSMMUT00000025464_120	ENSPTRT00000002883_973	ENST00000367988_65	chr1:161226124:+	9	0	0	0	0	0	0	0	0	ENST00000367988	65	7	4	4	9	0	0	0	0	0	0	0	ENSPTRT00000002883	973	20	17	4	9	0	0	0	0	0	0	0	ENSMMUT00000025464	120	10	7	4	TRUE	TRUE
ENSMMUT00000025464_130	ENSPTRT00000002883_983	ENST00000367988_75	chr1:161226134:+	9	5202.34	2459.66	0	3196.94	0	2612.45	41.9823	0.888842	ENST00000367988	75	1	5	3	9	0	0	17.9482	2789.85	0	6.09069	2.21824	ENSPTRT00000002883	983	4	18	3	9	5.45341	0	0	0	23.6901	3.27908	1.7603	ENSMMUT00000025464	130	6	8	3	TRUE	TRUE
ENSMMUT00000025464_148	ENSPTRT00000002883_1001	ENST00000367988_93	chr1:161226370:+	72	0	0	0	0	0	12.6884	5.9593	2.44949	ENST00000367988	93	4	6	2	72	0	0	6.6261	0	0	2.6961	2.23607	ENSPTRT00000002883	1001	6	19	2	72	3.61143	0	3.74716	0	0	1.63086	1.36969	ENSMMUT00000025464	148	8	9	2	TRUE	TRUE
ENSMMUT00000025464_181	ENSPTRT00000002883_1034	ENST00000367988_126	chr1:161226403:+	39	0	0	0	0	0	6.37876	3.02032	2.44949	ENST00000367988	126	5	7	1	39	0	0	6.6812	0	0	2.71882	2.23607	ENSPTRT00000002883	1034	5	20	1	39	3.60911	0	4.49932	0	0	1.73819	1.38299	ENSMMUT00000025464	181	7	10	1	TRUE	TRUE
ENSMMUT00000005701_780	ENSPTRT00000093345_442	ENST00000397566_365	chr11:615364:-	4	0	0	0	0	0	0	0	0	ENST00000397566	365	2	2	1	4	0	0	0	0	0	0	0	ENSPTRT00000093345	442	2	2	1	4	0	0	0	0	0	0	0	ENSMMUT00000005701	780	0	2	1	TRUE	TRUE
ENSMMUT00000023713_266	ENSPTRT00000006234_266	ENST00000265978_266	chr11:6224610:-	94	2.68433	0	0	4.67955	59.3168	0.90555	3.11002	2.09596	ENST00000265978	266	2	3	1	94	0	1.12367	1.03803	1.23845	4.70865	1.34553	1.10711	ENSPTRT00000006234	266	2	3	1	94	1.45456	2.15733	0	0	2.75314	1.32211	0.981682	ENSMMUT00000023713	266	2	4	1	TRUE	TRUE
ENSMMUT00000023713_237	ENSPTRT00000006234_237	ENST00000265978_237	chr11:6224639:-	33	4.47806	13.4123	0	17.5068	54.5805	1.70931	9.29592	1.33706	ENST00000265978	237	1	2	2	33	18.609	0	4.48124	2282.78	0	3.65394	2.20814	ENSPTRT00000006234	237	1	2	2	33	1.2125	0	0	0	0	0.15906	2.23607	ENSMMUT00000023713	237	4	3	2	TRUE	TRUE
ENSMMUT00000023713_93	ENSPTRT00000006234_93	ENST00000265978_93	chr11:6234619:-	15	0	0	0	2.65391	9.80444	1.83173	1.72433	1.59873	ENST00000265978	93	3	1	3	15	0	0	0.843643	2.78643	0	0.709001	1.66436	ENSPTRT00000006234	93	3	1	3	15	1.81797	0	1.18501	0	25.9214	5.14559	1.95058	ENSMMUT00000023713	93	1	1	4	TRUE	TRUE
ENSMMUT00000054519_651	ENSPTRT00000002914_27	ENST00000489294_32	chr1:162497849:+	12	31.7798	5.59044	29.3504	66.998	26536.3	9.48805	20.4554	2.43372	ENST00000489294	32	2	1	2	12	3.50091	4.1925	3.09083	0.241267	6.07434	3.16595	0.617884	ENSPTRT00000002914	27	2	1	2	12	1.68964	0	8.40536	0	1.78098	1.82491	1.46556	ENSMMUT00000054519	651	4	14	2	TRUE	TRUE
ENSMMUT00000054519_729	ENSPTRT00000002914_105	ENST00000489294_110	chr1:162497927:+	6	125.479	2.79569	65.2457	43146.2	55.087	58.3311	35.6819	2.42873	ENST00000489294	110	1	2	1	6	14.0049	23.8611	143.695	1.51767	183.992	25.0574	1.14616	ENSPTRT00000002914	105	1	2	1	6	2.51952	13.4615	2.13402	0	20.4461	5.40449	1.14657	ENSMMUT00000054519	729	1	15	1	TRUE	TRUE
ENSMMUT00000044366_408	ENSPTRT00000092246_502	ENST00000405837_402	chr11:62707291:-	3	0	0	0	0	0	0	0	0	ENST00000405837	402	6	6	1	45	0	0	0	0	0	0	0	ENSPTRT00000092246	502	8	8	1	45	0	0	0.500707	0	0	0.126216	2.23607	ENSMMUT00000044366	408	7	7	1	TRUE	TRUE
ENSMMUT00000044366_349	ENSPTRT00000092246_442	ENST00000405837_342	chr11:62709173:-	21	0	0	0	0	0	2.56166	0.287121	2.44949	ENST00000405837	342	5	5	2	21	0	0	0	0	0.810341	0.163399	2.23607	ENSPTRT00000092246	442	5	6	3	60	0.136873	0.199556	0.380113	2.32419	0	0.423845	1.59333	ENSMMUT00000044366	349	5	5	3	TRUE	TRUE
ENSMMUT00000044366_332	ENSPTRT00000092246_425	ENST00000405837_325	chr11:62709190:-	44	0	0	0	3.52112	0	3.40875	0.437266	1.5495	ENST00000405837	325	4	4	3	78	0	0	0	1.51639	0.675823	0.238105	1.52789	ENSPTRT00000092246	425	4	5	4	172	0.0798095	0.124842	0.453811	0.98811	0	0.303932	1.23536	ENSMMUT00000044366	332	6	4	4	TRUE	TRUE
ENSMMUT00000044366_280	ENSPTRT00000092246_373	ENST00000405837_273	chr11:62709242:-	27	0	4.03533	0	14.0364	1.96757	7.66625	2.92611	1.17829	ENST00000405837	273	3	3	4	27	0	0	1.3742	13.8529	0	2.12655	1.99342	ENSPTRT00000092246	373	2	4	5	27	0.505612	0	0	5.50075	1.82629	1.10104	1.48268	ENSMMUT00000044366	280	2	3	5	TRUE	TRUE
ENSMMUT00000044366_261	ENSPTRT00000092246_354	ENST00000405837_254	chr11:62709261:-	63	0	3.29955	0	7.01324	4.52221	3.41203	3.04648	0.890522	ENST00000405837	254	1	2	5	63	0	0.0920629	1.12447	7.69316	0	1.5409	1.8735	ENSPTRT00000092246	354	3	3	6	63	0.606778	1.59508	0.998421	6.19531	2.53036	1.86062	0.94328	ENSMMUT00000044366	261	1	2	6	TRUE	TRUE
ENSMMUT00000044366_224	ENSPTRT00000092246_317	ENST00000405837_217	chr11:62709298:-	18	0	5.76504	0	11.7815	4.42588	3.33344	2.97977	1.03896	ENST00000405837	217	2	1	6	18	27.0995	0.221449	3.37204	11.1921	10.7851	6.77508	0.987178	ENSPTRT00000092246	317	1	2	7	18	0.420075	0	2.58624	0	0	0.639466	1.87014	ENSMMUT00000044366	224	3	1	7	TRUE	TRUE
ENSMMUT00000068714_597	ENSPTRT00000044555_138	ENST00000316461_108	chr11:62728593:+	57	0	0.521277	0	1.18042	1.21168	0.366651	0.499502	0.993412	ENST00000316461	108	1	1	1	36	0	0	0.0638488	0.0454194	0	0.0320933	1.40139	ENSPTRT00000044555	138	1	1	1	36	0	0	0	2.21637	0	0.497551	2.23607	ENSMMUT00000068714	597	2	5	1	TRUE	TRUE
ENSMMUT00000076979_511	ENSPTRT00000007052_529	ENST00000394807_86	chr11:62754075:-	13	0	0	0	2213.57	3843.22	0	3.35146	1.63114	ENST00000394807	86	1	1	1	13	0	0	2017.72	0	0	2.1321	2.23607	ENSPTRT00000007052	529	1	3	1	13	8.17514	3.98763	0	0	0	1.83015	1.49847	ENSMMUT00000076979	511	1	4	1	TRUE	TRUE
ENSMMUT00000026407_107	ENSPTRT00000096187_592	ENST00000525239_349	chr11:62839760:-	190	0	1.15352	0	0.199876	1.68497	0	0.554088	1.44334	ENST00000525239	349	3	6	2	93	0	0	0	2.16292	0	0.613156	2.23607	ENSPTRT00000096187	592	3	7	3	192	0	0	0	0	0	0	0	ENSMMUT00000026407	107	0	3	2	TRUE	TRUE
ENSMMUT00000026407_100	ENSPTRT00000096187_585	ENST00000525239_342	chr11:62839767:-	30	0	0	0	0	0	0	0	0	ENST00000525239	342	6	5	3	30	0	0	0	0	0	0	0	ENSPTRT00000096187	585	6	6	4	132	0	0	0	0	0	0	0	ENSMMUT00000026407	100	0	2	3	TRUE	TRUE
ENSMMUT00000026407_21	ENSPTRT00000096187_505	ENST00000525239_262	chr11:62839847:-	33	0	0	0	0	0	0	0	0	ENST00000525239	262	5	4	4	33	0	4.93599	0	0	0	2.65506	2.23607	ENSPTRT00000096187	505	1	5	5	33	0	0	0	0	0	0	0	ENSMMUT00000026407	21	0	1	4	TRUE	TRUE
ENSMMUT00000017856_200	ENSPTRT00000000465_309	ENST00000375592_239	chr1:16315423:-	5	0	0	0	0	0	0.233318	0.0637915	2.44949	ENST00000375592	239	2	2	1	5	0	0	0.30681	6.50239	0	0.686684	2.11238	ENSPTRT00000000465	309	1	3	1	5	0.574709	1.10813	0	0	1.48421	0.604815	1.04576	ENSMMUT00000017856	200	2	2	1	TRUE	TRUE
ENSMMUT00000044397_138	ENSPTRT00000079018_620	ENST00000402010_145	chr11:63839072:+	117	2.23621	2.6092	0	5.99913	14.5197	5.60822	3.73836	0.988505	ENST00000402010	145	2	1	3	117	14.5957	5.28581	40.2327	0.592839	0	5.67642	1.37999	ENSPTRT00000079018	620	1	10	3	117	0.781013	4.19468	4.42387	5.58699	40.8963	6.52114	1.49511	ENSMMUT00000044397	138	2	1	3	TRUE	TRUE
ENSMMUT00000044397_192	ENSPTRT00000079018_674	ENST00000402010_199	chr11:63839126:+	63	2.79752	1.89933	0	6.00907	14.6337	9.34848	4.1593	0.942766	ENST00000402010	199	1	2	2	63	18.2892	5.29151	27.6121	0.651236	0	5.36823	1.1691	ENSPTRT00000079018	674	2	11	2	63	0.910185	4.20217	4.43409	5.59586	41.1996	6.77718	1.49289	ENSMMUT00000044397	192	1	2	2	TRUE	TRUE
ENSMMUT00000044397_464	ENSPTRT00000079018_946	ENST00000402010_471	chr11:63839398:+	24	0	0	10.8724	799.985	0	5.11969	3.33771	2.39209	ENST00000402010	471	3	3	1	24	0	3.70723	8.93976	0	12.1128	4.65411	1.09576	ENSPTRT00000079018	946	3	12	1	24	0.364875	1.55083	0	0	4.81734	1.56543	1.51636	ENSMMUT00000044397	464	3	3	1	TRUE	TRUE
ENSMMUT00000018151_167	ENSPTRT00000007124_165	ENST00000309422_214	chr11:64234751:+	42	166.219	13.9647	64.2998	47.3138	156.508	92.0357	64.8035	0.67545	ENST00000309422	214	2	2	2	42	132.101	171.682	108.411	10.8057	338.022	126.794	0.785829	ENSPTRT00000007124	165	1	1	2	42	4.0897	51.6256	68.8768	60.2368	109.866	57.5313	0.643614	ENSMMUT00000018151	167	1	1	2	TRUE	TRUE
ENSMMUT00000018151_213	ENSPTRT00000007124_211	ENST00000309422_260	chr11:64234797:+	37	7.09686	0.202471	0	2.35901	1.96781	4.75751	2.55978	1.00614	ENST00000309422	260	3	3	1	37	9.78277	22.5064	6.28614	0	17.1266	9.27634	0.795986	ENSPTRT00000007124	211	2	2	1	37	1.01099	1.9334	2.87717	0	0	1.09006	1.07447	ENSMMUT00000018151	213	2	2	1	TRUE	TRUE
ENSMMUT00000078479_95	ENSPTRT00000007201_963	ENST00000164133_509	chr11:64925639:+	15	0	0	0	3.5276	1.31232	0.855139	1.18675	1.45158	ENST00000164133	509	3	3	1	15	0	0	2.62168	0	6.57669	1.59153	1.56612	ENSPTRT00000007201	963	5	5	1	15	0.260447	0	0	0	0	0.0377961	2.23607	ENSMMUT00000078479	95	1	1	1	TRUE	TRUE
ENSMMUT00000075720_850	ENSPTRT00000007267_1	ENST00000355703_6	chr11:65615778:+	54	4.43569	0	2264.97	3.51651	0	3.40614	4.13109	2.43483	ENST00000355703	6	5	1	6	54	0	3.34088	12.1894	2.15746	0	2.49853	1.42626	ENSPTRT00000007267	1	5	1	6	54	225.847	0	0	0	0	0.750573	2.23607	ENSMMUT00000075720	850	7	9	6	TRUE	TRUE
ENSMMUT00000075720_1057	ENSPTRT00000007267_208	ENST00000355703_213	chr11:65615985:+	102	24.3473	11.562	46.3911	73.017	38.7767	129.114	31.4851	0.786441	ENST00000355703	213	1	2	5	102	51.4651	20.5822	14.0901	10.7838	2421.62	23.5682	2.12875	ENSPTRT00000007267	208	1	2	5	102	63.599	16.7738	25.9426	7199.82	15.4798	37.7431	2.18961	ENSMMUT00000075720	1057	1	10	5	TRUE	TRUE
ENSMMUT00000075720_1158	ENSPTRT00000007267_309	ENST00000355703_314	chr11:65616086:+	39	19.9877	0	0	246.842	2882.66	14.0257	14.7441	2.19604	ENST00000355703	314	2	3	4	39	0	0	1345.48	3.23731	2225.36	4.20946	1.43483	ENSPTRT00000007267	309	3	3	4	39	1.81033	0	0	0	0	0.381329	2.23607	ENSMMUT00000075720	1158	9	11	4	TRUE	TRUE
ENSMMUT00000075720_1269	ENSPTRT00000007267_420	ENST00000355703_425	chr11:65616197:+	9	0	9835.66	0	1066.31	0	2612.45	12.1417	1.71101	ENST00000355703	425	3	4	3	9	0	0	0	3.61105	0	0.509012	2.23607	ENSPTRT00000007267	420	6	4	3	9	0	0	0	0	10451.4	5.35953	2.23607	ENSMMUT00000075720	1269	4	12	3	TRUE	TRUE
ENSMMUT00000075720_1320	ENSPTRT00000007267_471	ENST00000355703_476	chr11:65616248:+	24	0	3.02456	0	1998.46	0	2286.02	6.5025	1.55278	ENST00000355703	476	4	5	2	24	0	0	3.36534	27.9637	7508.21	11.9701	2.22447	ENSPTRT00000007267	471	2	5	2	24	0	0	0	0	23.5941	2.64597	2.23607	ENSMMUT00000075720	1320	5	13	2	TRUE	TRUE
ENSMMUT00000075720_1340	ENSPTRT00000007267_491	ENST00000355703_496	chr11:65616268:+	44	0	0	0	0	0	357.107	0.765739	2.44949	ENST00000355703	496	6	6	1	43	0	3.85266	0	0	26.0058	3.8103	1.89611	ENSPTRT00000007267	491	4	6	1	43	0	0	0	0	0	0	0	ENSMMUT00000075720	1340	12	14	1	TRUE	TRUE
ENSMMUT00000063205_4	ENSPTRT00000061861_17	ENST00000406246_18	chr11:65662899:-	15	2.58087	1.65679	2.79782	14.8594	2.68494	2.76223	2.9143	1.1115	ENST00000406246	18	1	1	1	15	4.46755	1.29126	3.02185	0	2.65806	1.54482	0.746116	ENSPTRT00000061861	17	1	1	1	15	7.13711	2.42804	6.38275	4.39812	9.75104	5.41298	0.461236	ENSMMUT00000063205	4	1	1	1	TRUE	TRUE
ENSMMUT00000031684_540	ENSPTRT00000007313_50	ENST00000417856_55	chr11:66257348:+	141	0	0	0	0	0	6.29096	0.667729	2.44949	ENST00000417856	55	1	1	3	141	0	0	0	0	0	0	0	ENSPTRT00000007313	50	0	1	3	428	0.187194	0.11902	0.22228	0.120232	0	0.13149	0.655158	ENSMMUT00000031684	540	1	8	4	TRUE	TRUE
ENSMMUT00000031684_662	ENSPTRT00000007313_168	ENST00000417856_173	chr11:66257466:+	71	0	0	0	0	0	0.367513	0.0820759	2.44949	ENST00000417856	173	2	2	2	71	0	0	0	0	0	0	0	ENSPTRT00000007313	168	0	2	2	15	0	0	0	0	0	0	0	ENSMMUT00000031684	662	11	10	2	TRUE	TRUE
ENSMMUT00000009715_28	ENSPTRT00000007316_35	ENST00000311445_57	chr11:66278231:+	150	0	0	0	64.9188	250.744	0	70.8688	1.90986	ENST00000311445	57	1	1	2	150	66.6976	0	6.50001	0	0	10.4721	1.99714	ENSPTRT00000007316	35	2	1	2	150	0	0	0	0	0	0	0	ENSMMUT00000009715	28	0	1	2	TRUE	TRUE
ENSMMUT00000009715_160	ENSPTRT00000007316_167	ENST00000311445_189	chr11:66278363:+	18	0	0	0	0	0	0	0	0	ENST00000311445	189	2	2	1	18	0	0	1249.44	0	0	370.832	2.23607	ENSPTRT00000007316	167	1	2	1	18	0	0	0	0	0	0	0	ENSMMUT00000009715	160	0	2	1	TRUE	TRUE
ENSMMUT00000067057_1973	ENSPTRT00000106781_2834	ENST00000531863_398	chr11:66480410:+	4	17555.5	0	0	0	0	0	3369.67	2.44949	ENST00000531863	398	1	1	1	4	0	0	0	0	0	0	0	ENSPTRT00000106781	2834	0	34	1	30	0	0	0	0	0	0	0	ENSMMUT00000067057	1973	6	22	2	TRUE	TRUE
ENSMMUT00000006427_46	ENSPTRT00000101995_231	ENST00000288937_23	chr11:6683379:-	83	0.394031	0.205763	0	0.154546	0	0.130836	0.191919	0.996259	ENST00000288937	23	1	1	1	83	1.96286	0	0	0.155308	1.18144	0.394459	1.33299	ENSPTRT00000101995	231	1	6	1	83	1.29965	1.00631	0.439994	0.910219	3.50286	1.21088	0.836902	ENSMMUT00000006427	46	1	3	1	TRUE	TRUE
ENSMMUT00000025001_175	ENSPTRT00000002961_200	ENST00000367875_61	chr1:166840149:+	102	0	0	0	0	0	0	0	0	ENST00000367875	61	0	1	5	210	0	0	0	0	0	0	0	ENSPTRT00000002961	200	3	2	8	12	0	0	0	0	0	0	0	ENSMMUT00000025001	175	0	1	10	TRUE	TRUE
ENSMMUT00000025001_189	ENSPTRT00000002961_214	ENST00000367875_75	chr1:166840163:+	42	0	0	0	0	0	0	0	0	ENST00000367875	75	0	2	4	42	0	0	0	0	0	0	0	ENSPTRT00000002961	214	4	3	7	42	0	0	0	0	0	0	0	ENSMMUT00000025001	189	0	2	9	TRUE	TRUE
ENSMMUT00000025001_298	ENSPTRT00000002961_323	ENST00000367875_184	chr1:166840272:+	87	0	0	0	0	0	0	0	0	ENST00000367875	184	0	3	3	87	0	0	0	0	0	0	0	ENSPTRT00000002961	323	6	5	5	87	0	0	0	0	0	0	0	ENSMMUT00000025001	298	0	3	8	TRUE	TRUE
ENSMMUT00000025001_373	ENSPTRT00000002961_398	ENST00000367875_259	chr1:166840347:+	12	0	0	0	0	0	0	0	0	ENST00000367875	259	0	4	2	12	0	0	0	0	0	0	0	ENSPTRT00000002961	398	7	6	4	12	0	0	0	0	0	0	0	ENSMMUT00000025001	373	0	4	7	TRUE	TRUE
ENSMMUT00000025001_416	ENSPTRT00000002961_441	ENST00000367875_302	chr1:166840390:+	42	0	0	0	0	0	0	0	0	ENST00000367875	302	0	5	1	42	0	0	0	0	0	0	0	ENSPTRT00000002961	441	8	7	3	42	0	0	0	0	0	0	0	ENSMMUT00000025001	416	0	5	6	TRUE	TRUE
ENSMMUT00000007726_1731	ENSPTRT00000105916_1692	ENST00000325656_14	chr11:67455360:+	45	0	0	0	0	0	0	0	0	ENST00000325656	14	0	1	1	45	0	0	0	0	0	0	0	ENSPTRT00000105916	1692	0	21	1	66	0	0	0	0	0	0	0	ENSMMUT00000007726	1731	0	22	1	TRUE	TRUE
ENSMMUT00000007731_43	ENSPTRT00000007392_45	ENST00000308022_23	chr11:67469229:-	24	0.792272	0	11.7432	3.53936	11.8079	3.41942	4.24516	1.01018	ENST00000308022	23	1	1	1	24	1.86754	2.856	3.53322	0.21715	5.31511	2.67298	0.687956	ENSPTRT00000007392	45	2	2	1	24	4.44566	13.7277	1.95602	8.09059	10.1567	6.59358	0.604477	ENSMMUT00000007731	43	1	1	1	TRUE	TRUE
ENSMMUT00000016554_94	ENSPTRT00000007393_33	ENST00000279146_28	chr11:67483053:+	33	1.47485	0.331999	0	4.37372	2.87617	2.40787	1.82126	0.862458	ENST00000279146	28	1	1	1	33	1.89092	0.40673	2.37848	1.61451	0	1.06994	0.803762	ENSPTRT00000007393	33	1	1	1	33	1.02474	0.654521	0.776074	0.218596	0.415136	0.546939	0.506988	ENSMMUT00000016554	94	1	1	1	TRUE	TRUE
ENSMMUT00000047651_291	ENSPTRT00000109988_1897	ENST00000617444_715	chr1:1676746:-	47	0	0	0	0	0	0	0	0	ENST00000617444	715	8	8	1	47	1.83377	0	0	0	0	0.380922	2.23607	ENSPTRT00000109988	1897	1	23	1	47	1.63124	2.98235	1.15071	0	0	1.276	1.08288	ENSMMUT00000047651	291	2	2	1	TRUE	TRUE
ENSMMUT00000029651_187	ENSPTRT00000003001_187	ENST00000367811_21	chr1:169367777:-	63	0	9.1418	0	4.03745	4.42224	1.11522	2.48234	1.13146	ENST00000367811	21	1	2	1	63	0	0	0	5.88273	2.6999	1.66052	1.51815	ENSPTRT00000003001	187	2	4	1	63	0	0	0	7.65435	0	2.07174	2.23607	ENSMMUT00000029651	187	1	3	1	TRUE	TRUE
ENSMMUT00000029651_184	ENSPTRT00000003001_184	ENST00000367811_18	chr1:169367780:-	66	0	9.14121	0	4.03697	4.42184	1.11521	2.48223	1.13146	ENST00000367811	18	2	1	2	66	0	0	0	5.88261	2.6324	1.65148	1.52653	ENSPTRT00000003001	184	3	3	2	66	0	0	0	7.65399	0	2.07166	2.23607	ENSMMUT00000029651	184	2	2	2	TRUE	TRUE
ENSMMUT00000002285_13	ENSPTRT00000000501_94	ENST00000375499_84	chr1:17054087:-	54	2.74031	8.05744	16.1703	8.77646	16.3232	30.2654	9.1201	0.701711	ENST00000375499	84	1	2	1	54	0	9.44528	4.65069	582.01	6.86764	6.52166	2.13908	ENSPTRT00000000501	94	1	2	1	54	1.59173	0	0	6.34339	10.5809	2.86383	1.25326	ENSMMUT00000002285	13	1	1	1	TRUE	TRUE
ENSMMUT00000019969_233	ENSPTRT00000003034_125	ENST00000367749_63	chr1:171314245:+	21	0	4.03284	0	0	2379.51	0	3.65159	2.44452	ENST00000367749	63	1	1	2	21	0	0	4.47657	0	0	1.82385	2.23607	ENSPTRT00000003034	125	1	1	2	21	3.63133	0	5.52588	38.4293	0	4.3618	1.7166	ENSMMUT00000019969	233	1	3	2	TRUE	TRUE
ENSMMUT00000019969_403	ENSPTRT00000003034_282	ENST00000367749_220	chr1:171314402:+	18	0	0	0	0	0	0	0	0	ENST00000367749	220	2	2	1	18	0	0	1249.44	0	0	0.785164	2.23607	ENSPTRT00000003034	282	2	2	1	57	0	0	0	0	0	0	0	ENSMMUT00000019969	403	3	4	1	TRUE	TRUE
ENSMMUT00000019157_280	ENSPTRT00000111008_265	ENST00000367742_227	chr1:171512073:+	16	9.49308	2.40377	15.653	18.705	33.8374	1.96652	7.12042	0.875807	ENST00000367742	227	1	1	1	16	2.05285	0	4.10862	3.53293	4.45554	2.23226	0.646371	ENSPTRT00000111008	265	1	1	1	16	10.0053	5.6981	1.4226	3.43963	1.97888	3.91147	0.773818	ENSMMUT00000019157	280	1	1	1	TRUE	TRUE
ENSMMUT00000010153_792	ENSPTRT00000049395_477	ENST00000361735_9	chr1:171781668:+	24	0	8.57385	0	0	0	1.28151	2.38593	2.0907	ENST00000361735	9	3	1	5	24	0	0	0	0	0	0	0	ENSPTRT00000049395	477	8	5	5	99	675.541	5.30897	0	0.89061	0	1.70317	2.21071	ENSMMUT00000010153	792	4	11	3	TRUE	TRUE
ENSMMUT00000010153_945	ENSPTRT00000049395_646	ENST00000361735_178	chr1:171781837:+	96	2.55264	4.33863	2.34264	11.1551	7.85612	2.36626	3.51721	0.714306	ENST00000361735	178	1	4	2	96	1.01672	3.02858	2.45182	5.14388	0	2.47442	0.84753	ENSPTRT00000049395	646	1	8	2	96	4.45775	3.16682	0.562102	0.282167	1.60726	1.79258	0.879786	ENSMMUT00000010153	945	3	12	2	TRUE	TRUE
ENSMMUT00000010153_1020	ENSPTRT00000049395_721	ENST00000361735_253	chr1:171781912:+	21	0	0.2247	0	1827.25	0	0.961998	0.428843	2.44758	ENST00000361735	253	5	5	1	21	0	0	0	5.05436	0	0.545735	2.23607	ENSPTRT00000049395	721	2	9	1	21	4.3633	0	0	0	1.34914	0.911719	1.65682	ENSMMUT00000010153	1020	5	13	1	TRUE	TRUE
ENSMMUT00000029944_91	ENSPTRT00000007505_86	ENST00000278671_1	chr11:72103297:-	6	0	0	16.9692	0	0.984617	3.84507	2.19718	1.84437	ENST00000278671	1	1	1	1	6	0	0	0	0	0.675381	0.0836391	2.23607	ENSPTRT00000007505	86	1	1	1	6	4.32129	3.06846	1.06082	3.36333	2.10911	2.45062	0.447265	ENSMMUT00000029944	91	1	1	1	TRUE	TRUE
ENSMMUT00000073883_233	ENSPTRT00000109953_790	ENST00000409314_154	chr11:73141893:-	16	0	0	0	0.787094	0	0.0535458	0.0804855	2.26742	ENST00000409314	154	1	1	1	16	2.40744	0	0	0.504309	0	0.415652	1.79165	ENSPTRT00000109953	790	1	1	1	16	0	1.77249	4.73918	0	3.39104	1.65713	1.05574	ENSMMUT00000073883	233	1	1	1	TRUE	TRUE
ENSMMUT00000004449_200	ENSPTRT00000097832_246	ENST00000263674_156	chr11:73308444:+	36	1301.34	5225.66	3882.09	533.657	8152.37	12.7569	132.533	0.992638	ENST00000263674	156	1	1	1	36	0	994.772	0	0	0	247.555	2.23607	ENSPTRT00000097832	246	1	1	1	36	0	0	0	0	0	0	0	ENSMMUT00000004449	200	0	1	1	TRUE	TRUE
ENSMMUT00000023593_199	ENSPTRT00000003071_447	ENST00000209884_133	chr1:173716037:+	7	0	0	0	0	0	0	0	0	ENST00000209884	133	0	1	1	7	0	0	0	0.963679	0	0.488657	2.23607	ENSPTRT00000003071	447	1	4	1	7	0	0	0	0	0	0	0	ENSMMUT00000023593	199	0	2	1	TRUE	TRUE
ENSMMUT00000053719_15	ENSPTRT00000092848_157	ENST00000339764_157	chr11:73950475:+	84	0	0	0	0	0	0	0	0	ENST00000339764	157	0	6	8	84	0	0	0	0	0	0	0	ENSPTRT00000092848	157	0	6	8	84	0	0	0	0	0	0	0	ENSMMUT00000053719	15	0	1	8	TRUE	TRUE
ENSMMUT00000053719_184	ENSPTRT00000092848_339	ENST00000339764_336	chr11:73950654:+	12	0	0	0	0	0	0	0	0	ENST00000339764	336	0	9	5	12	0	0	0	0	0	0	0	ENSPTRT00000092848	339	0	9	5	12	0	0	0	0	0	0	0	ENSMMUT00000053719	184	0	3	6	TRUE	TRUE
ENSMMUT00000053719_190	ENSPTRT00000092848_345	ENST00000339764_342	chr11:73950660:+	6	0	0	0	0	0	0	0	0	ENST00000339764	342	0	10	4	6	0	0	0	0	0	0	0	ENSPTRT00000092848	345	0	10	4	6	0	0	0	0	0	0	0	ENSMMUT00000053719	190	0	4	5	TRUE	TRUE
ENSMMUT00000053719_201	ENSPTRT00000092848_356	ENST00000339764_353	chr11:73950671:+	60	0	0	0	0	0	0	0	0	ENST00000339764	353	0	11	3	60	0	0	0	0	0	0	0	ENSPTRT00000092848	356	0	11	3	75	0	0	0	0	0	0	0	ENSMMUT00000053719	201	0	5	4	TRUE	TRUE
ENSMMUT00000053719_256	ENSPTRT00000092848_416	ENST00000339764_413	chr11:73950731:+	12	0	0	0	0	0	0	0	0	ENST00000339764	413	0	12	2	12	0	0	0	0	0	0	0	ENSPTRT00000092848	416	0	12	2	12	0	0	0	0	0	0	0	ENSMMUT00000053719	256	0	6	3	TRUE	TRUE
ENSMMUT00000053719_280	ENSPTRT00000092848_440	ENST00000339764_437	chr11:73950755:+	15	0	0	0	0	0	0	0	0	ENST00000339764	437	0	13	1	15	0	0	0	0	0	0	0	ENSPTRT00000092848	440	0	13	1	15	0	0	0	0	0	0	0	ENSMMUT00000053719	280	0	7	2	TRUE	TRUE
ENSMMUT00000061390_602	ENSPTRT00000007559_620	ENST00000310473_194	chr11:73981562:-	51	1.99507	3.20373	2.10895	2.31906	6.28283	4.0254	3.37352	0.494801	ENST00000310473	194	3	3	1	51	0.124096	0.635206	1.02277	3.94948	0.75208	1.04131	1.17091	ENSPTRT00000007559	620	3	7	4	51	2.87733	1.68602	1.27339	1.62623	0.974842	1.71126	0.429238	ENSMMUT00000061390	602	3	4	1	TRUE	TRUE
ENSMMUT00000061390_578	ENSPTRT00000007559_596	ENST00000310473_170	chr11:73981586:-	75	2.77357	4.56889	5.54817	3.48484	8.32778	4.72961	4.81518	0.39563	ENST00000310473	170	2	2	2	75	0.695694	1.2498	1.34733	4.16835	1.32895	1.50161	0.781443	ENSPTRT00000007559	596	2	6	5	75	3.13805	2.59958	1.65743	2.22662	1.45661	2.23385	0.309919	ENSMMUT00000061390	578	1	3	2	TRUE	TRUE
ENSMMUT00000061390_542	ENSPTRT00000007559_560	ENST00000310473_134	chr11:73981622:-	111	3.46201	5.25283	5.41942	4.72852	7.82462	4.6571	5.10003	0.277049	ENST00000310473	134	1	1	3	111	0.952527	1.77167	1.56659	4.36142	1.66247	1.83091	0.641607	ENSPTRT00000007559	560	1	5	6	111	2.64205	2.19496	1.95238	2.15765	1.63305	2.13451	0.174394	ENSMMUT00000061390	542	2	2	3	TRUE	TRUE
ENSMMUT00000000906_636	ENSPTRT00000003080_98	ENST00000367696_218	chr1:173993120:-	9	0	0	0	10.5929	0	0	1.82843	2.44949	ENST00000367696	218	1	1	1	9	0	0	0	0	0	0	0	ENSPTRT00000003080	98	0	1	1	9	0	0	0	0	0	0	0	ENSMMUT00000000906	636	0	7	1	TRUE	TRUE
ENSMMUT00000069175_440	ENSPTRT00000007562_259	ENST00000314032_58	chr11:74009028:-	12	0	0	0	0	0	0	0	0	ENST00000314032	58	0	2	1	12	0	0	0	0	0	0	0	ENSPTRT00000007562	259	0	3	1	12	0	0	0	0	0	0	0	ENSMMUT00000069175	440	0	7	1	TRUE	TRUE
ENSMMUT00000069175_397	ENSPTRT00000007562_216	ENST00000314032_15	chr11:74009071:-	111	0	0	0	0	0	0	0	0	ENST00000314032	15	0	1	2	111	0	0	0	0	0	0	0	ENSPTRT00000007562	216	0	2	2	111	0	0	0	0	0	0	0	ENSMMUT00000069175	397	0	6	2	TRUE	TRUE
ENSMMUT00000014943_6	ENSPTRT00000083933_127	ENST00000531509_93	chr11:74988371:+	111	0	0	0	0	0	0	0	0	ENST00000531509	93	8	1	8	111	0	0	0	0	0	0	0	ENSPTRT00000083933	127	0	1	9	111	0	0	0	0	0	0	0	ENSMMUT00000014943	6	0	1	12	TRUE	TRUE
ENSMMUT00000014943_80	ENSPTRT00000083933_201	ENST00000531509_167	chr11:74988445:+	201	0	0	0	0	0	0	0	0	ENST00000531509	167	2	2	7	201	0	0	0	0	0	0	0	ENSPTRT00000083933	201	0	2	8	72	0	0	0	0	0	0	0	ENSMMUT00000014943	80	0	2	11	TRUE	TRUE
ENSMMUT00000014943_94	ENSPTRT00000083933_215	ENST00000531509_181	chr11:74988459:+	6	0	0	0	0	0	0	0	0	ENST00000531509	181	3	3	6	6	0	0	0	0	0	0	0	ENSPTRT00000083933	215	0	3	7	6	0	0	0	0	0	0	0	ENSMMUT00000014943	94	0	3	10	TRUE	TRUE
ENSMMUT00000014943_111	ENSPTRT00000083933_232	ENST00000531509_198	chr11:74988476:+	6	0	0	0	0	0	0	0	0	ENST00000531509	198	5	5	4	6	0	0	0	0	0	0	0	ENSPTRT00000083933	232	0	5	5	6	0	0	0	0	0	0	0	ENSMMUT00000014943	111	0	4	9	TRUE	TRUE
ENSMMUT00000014943_117	ENSPTRT00000083933_238	ENST00000531509_204	chr11:74988482:+	24	0	0	0	0	0	0	0	0	ENST00000531509	204	6	6	3	24	0	0	0	0	0	0	0	ENSPTRT00000083933	238	0	6	4	162	0	0	0	0	0	0	0	ENSMMUT00000014943	117	0	5	8	TRUE	TRUE
ENSMMUT00000014943_148	ENSPTRT00000083933_271	ENST00000531509_237	chr11:74988515:+	72	0	0	0	0	0	0	0	0	ENST00000531509	237	7	7	2	72	0	0	0	0	0	0	0	ENSPTRT00000083933	271	0	7	3	72	0	0	0	0	0	0	0	ENSMMUT00000014943	148	0	6	7	TRUE	TRUE
ENSMMUT00000014943_191	ENSPTRT00000083933_314	ENST00000531509_280	chr11:74988558:+	211	0	0	0	0	0	1.69417	0.214757	2.44949	ENST00000531509	280	1	8	1	300	0	0	0	0	0	0	0	ENSPTRT00000083933	314	0	8	2	204	0	0	0	0	0	0	0	ENSMMUT00000014943	191	0	7	6	TRUE	TRUE
ENSMMUT00000043840_19	ENSPTRT00000086412_491	ENST00000336898_835	chr11:75477777:-	12	0	0	0	3.53599	0	0	0.291535	2.44949	ENST00000336898	835	2	2	1	12	0	2.57333	8740.11	0.13574	0	2.59258	2.2352	ENSPTRT00000086412	491	1	4	1	12	0	0	0	0	0	0	0	ENSMMUT00000043840	19	0	1	1	TRUE	TRUE
ENSMMUT00000000276_180	ENSPTRT00000007611_194	ENST00000228027_153	chr11:75768930:+	45	5.58167	12.0796	0	13.9511	23.3139	7.25283	10.7258	0.776142	ENST00000228027	153	1	1	1	45	0	2.05494	5.59209	0	0	1.8266	1.59487	ENSPTRT00000007611	194	1	1	1	45	0	7.16629	0	5.03829	41.0473	6.91068	1.62253	ENSMMUT00000000276	180	1	1	1	TRUE	TRUE
ENSMMUT00000000278_358	ENSPTRT00000007612_360	ENST00000356136_7	chr11:75815216:+	15	1561.4	0	84.4141	5114.5	1665.96	19.2169	17.6533	1.40269	ENST00000356136	7	1	1	2	15	27.1064	30.7173	24.6883	6.49764	82.6757	28.0721	0.832703	ENSPTRT00000007612	360	1	6	2	15	1.0918	7.95141	41.3625	5.37776	2.22574	5.36588	1.45264	ENSMMUT00000000278	358	2	5	2	TRUE	TRUE
ENSMMUT00000000278_485	ENSPTRT00000007612_496	ENST00000356136_152	chr11:75815361:+	47	14.329	3.07538	0	17.5642	26.9805	4.1932	8.49262	0.94244	ENST00000356136	152	2	2	1	47	4.47168	4.32415	2232.26	1.08403	9.29387	4.39617	2.21227	ENSPTRT00000007612	496	3	7	1	47	14.4636	10.2421	10.1868	2.79857	9.63328	9.83734	0.443811	ENSMMUT00000000278	485	1	6	1	TRUE	TRUE
ENSMMUT00000058209_672	ENSPTRT00000090699_783	ENST00000407242_188	chr11:76669813:-	56	0	0	0	0	0	0	0	0	ENST00000407242	188	0	1	1	56	0	0	0	0	0	0	0	ENSPTRT00000090699	783	0	7	1	56	0	0	0	0	0	0	0	ENSMMUT00000058209	672	0	7	1	TRUE	TRUE
ENSMMUT00000024405_149	ENSPTRT00000007654_129	ENST00000308488_145	chr11:77820873:-	84	929.811	0	0	0	24.9649	0	13.6094	2.37346	ENST00000308488	145	1	1	1	84	10.4126	18.4172	0.190839	1.44336	0	5.37688	1.3337	ENSPTRT00000007654	129	1	1	1	84	18.8828	4.40766	0	0	0	3.53458	1.75559	ENSMMUT00000024405	149	2	1	24	TRUE	TRUE
ENSMMUT00000006579_9	ENSPTRT00000007678_5	ENST00000281038_9	chr11:78574856:-	9	0	0	0	0	0	0	0	0	ENST00000281038	9	0	1	1	9	0	0	0	0	0	0	0	ENSPTRT00000007678	5	0	1	1	9	0	0	0	0	0	0	0	ENSMMUT00000006579	9	0	1	1	TRUE	TRUE
ENSMMUT00000024689_6	ENSPTRT00000003118_86	ENST00000367635_261	chr1:178776687:+	24	2.52378	0	0	24.5822	2.95014	25.5559	4.74147	1.32754	ENST00000367635	261	2	2	3	24	0	0	0	4.32731	0	3.62729	2.23607	ENSPTRT00000003118	86	1	1	3	13	3.62936	43.7375	0	5.32291	0	5.74791	1.77484	ENSMMUT00000024689	6	1	1	2	TRUE	TRUE
ENSMMUT00000024689_26	ENSPTRT00000003118_106	ENST00000367635_281	chr1:178776707:+	30	1.86919	0	0	0	0	1.70784	0.971314	1.55156	ENST00000367635	281	3	3	2	30	0	0	0	3.60476	0	2.27298	2.23607	ENSPTRT00000003118	106	2	2	2	30	0	0	0	0	0	0	0	ENSMMUT00000024689	26	2	2	1	TRUE	TRUE
ENSMMUT00000053815_299	ENSPTRT00000058468_321	ENST00000609928_318	chr1:179865783:-	63	9.31185	9.32742	0	17.6114	8.62262	5.4269	7.23139	0.687283	ENST00000609928	318	2	2	5	63	2.00013	0	0.749973	4.14499	0	1.30752	1.26826	ENSPTRT00000058468	321	5	2	4	63	2.88923	0	0	0	0	0.559688	2.23607	ENSMMUT00000053815	299	1	2	2	TRUE	TRUE
ENSMMUT00000053815_230	ENSPTRT00000058468_252	ENST00000609928_249	chr1:179865852:-	6	1.3466	0	0	0	5.90456	1.28255	2.12285	1.60899	ENST00000609928	249	6	1	6	6	0	5.07622	4.07606	10.4037	1113.18	5.03379	2.18787	ENSPTRT00000058468	252	1	1	5	6	2.50189	0	0	0.168349	0	0.365443	2.06437	ENSMMUT00000053815	230	2	1	3	TRUE	TRUE
ENSMMUT00000007925_13	ENSPTRT00000003191_64	ENST00000367549_21	chr1:182839367:+	63	2.03032	1.36234	6.99324	7.77577	17.04	0.478988	2.9198	1.04678	ENST00000367549	21	1	1	1	63	0	0	1.04428	1.41647	0	0.637818	1.39517	ENSPTRT00000003191	64	1	2	1	63	4.38988	0.659438	0.768736	2.82776	0.404895	1.20932	0.959803	ENSMMUT00000007925	13	1	1	1	TRUE	TRUE
ENSMMUT00000007086_327	ENSPTRT00000007691_327	ENST00000298281_332	chr11:83157319:+	9	2.99099	11.5341	5.80209	4.42416	14.4346	26.4825	10.678	0.802974	ENST00000298281	332	1	1	1	9	0	0	16230.8	3.03429	13.4923	7.54674	2.23323	ENSPTRT00000007691	327	1	1	1	9	10.9121	21.9167	65.0814	11.7627	23.7288	20.7513	0.833308	ENSMMUT00000007086	327	1	1	1	TRUE	TRUE
ENSMMUT00000023027_526	ENSPTRT00000003209_9	ENST00000304685_425	chr1:183742133:+	25	0	16.0176	0	0	0	0	11.6661	2.44949	ENST00000304685	425	1	5	1	25	0	0	0	0	0	0	0	ENSPTRT00000003209	9	0	1	1	25	0	0	0	0	0	0	0	ENSMMUT00000023027	526	6	6	1	TRUE	TRUE
ENSMMUT00000068129_140	ENSPTRT00000104317_205	ENST00000318130_160	chr1:184754699:-	24	60.1936	20.1096	0	12.3453	2082.2	35.8222	31.7142	2.27937	ENST00000318130	160	1	1	1	24	9.6124	18.3993	49.1365	7.79445	8342.34	19.077	2.20792	ENSPTRT00000104317	205	1	1	1	24	48.7909	60.1595	14.3867	75.5399	31.1352	39.2939	0.5214	ENSMMUT00000068129	140	1	1	1	TRUE	TRUE
ENSMMUT00000019491_324	ENSPTRT00000003226_397	ENST00000367498_298	chr1:185311316:-	36	7.32081	5.67	5.92976	8.24768	23.1864	3.95863	6.42084	0.782007	ENST00000367498	298	1	5	1	36	2.80135	0.670681	2.72883	4.33623	6.81724	3.20266	0.656792	ENSPTRT00000003226	397	3	5	1	36	6.01519	3.42822	0	0.0564282	0.0497992	1.19844	1.42674	ENSMMUT00000019491	324	3	5	1	TRUE	TRUE
ENSMMUT00000019491_321	ENSPTRT00000003226_394	ENST00000367498_295	chr1:185311319:-	39	6.04801	5.54198	5.01809	9.42406	23.1822	3.45085	5.80314	0.834611	ENST00000367498	295	2	4	2	39	3.1612	0.57335	2.48443	4.32214	7.25039	3.14624	0.694609	ENSPTRT00000003226	394	4	4	2	39	6.01484	3.2568	0	0.0470522	0.0467131	1.087	1.44363	ENSMMUT00000019491	321	4	4	2	TRUE	TRUE
ENSMMUT00000019491_309	ENSPTRT00000003226_382	ENST00000367498_283	chr1:185316961:-	51	3.83823	4.03799	5.07409	12.3689	21.614	2.56491	4.51246	0.899251	ENST00000367498	283	4	3	3	51	2.12725	1.0019	2.38479	3.35963	6.99934	2.74623	0.72355	ENSPTRT00000003226	382	5	3	3	51	3.89747	3.22839	0	0.464118	0.0356721	0.999651	1.23537	ENSMMUT00000019491	309	5	3	3	TRUE	TRUE
ENSMMUT00000019491_289	ENSPTRT00000003226_362	ENST00000367498_263	chr1:185316981:-	24	2.09439	1.44228	0	17.6588	15.2345	1.02609	2.46906	1.27672	ENST00000367498	263	5	2	4	24	5.00218	6.84814	7.63235	1.60865	1.62022	4.33682	0.624838	ENSPTRT00000003226	362	2	2	4	24	0	3.05719	4.47799	5.80061	2.05458	3.73869	0.724532	ENSMMUT00000019491	289	1	2	4	TRUE	TRUE
ENSMMUT00000019491_285	ENSPTRT00000003226_358	ENST00000367498_259	chr1:185316985:-	75	4.87976	4.62659	13.0452	17.6568	25.9718	2.80527	5.72488	0.793711	ENST00000367498	259	3	1	5	75	5.38459	4.03246	6.71011	4.69187	9.68699	5.5739	0.366571	ENSPTRT00000003226	358	1	1	5	75	7.35213	5.10202	1.6794	2.71834	1.51629	3.03993	0.682093	ENSMMUT00000019491	285	2	1	5	TRUE	TRUE
ENSMMUT00000024921_95	ENSPTRT00000045765_96	ENST00000278483_83	chr11:86302322:+	6	2.82366	1.46077	2.65998	6.86105	5.19122	20.6623	5.7064	1.08253	ENST00000278483	83	1	1	1	6	14.9576	13.3329	18.087	0.345684	9.4817	11.5128	0.608029	ENSPTRT00000045765	96	1	1	1	6	2.01472	12.4717	1.91519	1.17221	6.69795	5.23546	0.986244	ENSMMUT00000024921	95	1	1	1	TRUE	TRUE
ENSMMUT00000031866_48	ENSPTRT00000003258_621	ENST00000367440_434	chr1:193105681:-	43	0	0	0	0	0	0	0	0	ENST00000367440	434	0	8	1	43	0	0	0	0	0	0	0	ENSPTRT00000003258	621	0	13	1	43	0	0	0	0	0	0	0	ENSMMUT00000031866	48	0	3	1	TRUE	TRUE
ENSMMUT00000031866_17	ENSPTRT00000003258_590	ENST00000367440_403	chr1:193105712:-	45	0	0	0	0	0	0	0	0	ENST00000367440	403	0	7	2	45	0	0	0	0	0	0	0	ENSPTRT00000003258	590	0	12	2	45	0	0	0	0	0	0	0	ENSMMUT00000031866	17	0	2	2	TRUE	TRUE
ENSMMUT00000031866_2	ENSPTRT00000003258_572	ENST00000367440_385	chr1:193105730:-	63	0	0	0	0	0	0	0	0	ENST00000367440	385	0	6	3	63	0	0	0	0	0	0	0	ENSPTRT00000003258	572	0	11	3	60	0	0	0	0	0	0	0	ENSMMUT00000031866	2	0	1	3	TRUE	TRUE
ENSMMUT00000006383_56	ENSPTRT00000007801_332	ENST00000227638_347	chr11:94129187:+	57	30.9326	0.673675	0	1851.28	27.0999	13.6029	7.53176	2.33934	ENST00000227638	347	2	2	1	57	0	0	8.60042	1.4426	4.04058	2.46649	1.2887	ENSPTRT00000007801	332	2	2	1	27	1.81322	0	0	0	0	0.127045	2.23607	ENSMMUT00000006383	56	1	1	1	TRUE	TRUE
ENSMMUT00000073007_164	ENSPTRT00000007809_129	ENST00000544612_59	chr11:94496610:+	30	0	0.183981	0.851694	0	1.16356	0.624077	0.571273	1.0298	ENST00000544612	59	2	2	2	30	1.08682	0	3.02642	0.963683	4.04802	1.12905	0.908778	ENSPTRT00000007809	129	1	2	2	30	0.107519	0	0	0	0	0.0209946	2.23607	ENSMMUT00000073007	164	2	4	2	TRUE	TRUE
ENSMMUT00000073007_218	ENSPTRT00000007809_184	ENST00000544612_114	chr11:94496665:+	15	0	0	0	0	0	0	0	0	ENST00000544612	114	3	3	1	15	0	0	1.60621	0	0	0.46982	2.23607	ENSPTRT00000007809	184	2	3	1	15	0.606798	0	0	0	0	0.0881249	2.23607	ENSMMUT00000073007	218	1	5	1	TRUE	TRUE
ENSMMUT00000009634_944	ENSPTRT00000081663_926	ENST00000433834_372	chr1:19484293:-	14	0	0	0	0	0	0	0	0	ENST00000433834	372	0	4	1	14	0	0	0	0	0	0	0	ENSPTRT00000081663	926	0	7	1	14	0	0	0	0	0	0	0	ENSMMUT00000009634	944	7	7	1	TRUE	TRUE
ENSMMUT00000009634_879	ENSPTRT00000081663_861	ENST00000433834_307	chr1:19484358:-	24	0	0	0	0	0	0	0	0	ENST00000433834	307	0	3	2	24	0	0	0	0	0	0	0	ENSPTRT00000081663	861	0	6	2	24	0	0	0	0	0	0	0	ENSMMUT00000009634	879	6	5	3	TRUE	TRUE
ENSMMUT00000055223_873	ENSPTRT00000098059_5	ENST00000279839_22	chr11:94973535:-	46	0	0.220898	0.275924	0.0244069	0.026703	0.0799343	0.0751339	1.10559	ENST00000279839	22	2	2	1	42	0.253231	0	0.131928	0.040998	0	0.0681256	1.27031	ENSPTRT00000098059	5	1	1	2	46	0.069551	0	0.0826433	0	0.0807513	0.0454555	0.919167	ENSMMUT00000055223	873	2	12	1	TRUE	TRUE
ENSMMUT00000020766_9	ENSPTRT00000046561_199	ENST00000346299_204	chr11:95924092:-	42	0.935286	0	1.8636	3.09484	7.84664	2.68079	2.13533	1.00384	ENST00000346299	204	2	3	1	42	5.46785	1.89592	2.76659	0.38316	3.41619	2.48369	0.67525	ENSPTRT00000046561	199	1	3	1	42	2.59685	0.997332	4.29405	6.38625	2.76921	3.32373	0.596409	ENSMMUT00000020766	9	1	1	1	TRUE	TRUE
ENSMMUT00000003546_464	ENSPTRT00000000548_670	ENST00000294543_92	chr1:19798187:-	36	0	0	0	0	0	0	0	0	ENST00000294543	92	0	1	1	36	0	0	0	0	0	0	0	ENSPTRT00000000548	670	5	5	1	36	0	0	0	0	0	0	0	ENSMMUT00000003546	464	0	6	1	TRUE	TRUE
ENSMMUT00000005666_26	ENSPTRT00000101070_35	ENST00000391959_26	chr1:202348724:+	39	0	3121.61	51.4987	2.82802	801.462	1005.4	16.582	1.4512	ENST00000391959	26	1	1	1	39	27.8308	0	2305.82	0	50.058	29.2982	2.14519	ENSPTRT00000101070	35	1	1	1	39	0	5.30448	0	0	0	1.48958	2.23607	ENSMMUT00000005666	26	1	1	1	TRUE	TRUE
ENSMMUT00000033260_165	ENSPTRT00000003385_160	ENST00000340990_81	chr1:202958232:-	6	21.9928	3.71533	52.8763	36.9813	16.8747	17.7568	18.3943	0.692187	ENST00000340990	81	1	1	1	6	18.7805	13.1339	26.5185	40.1026	43.6344	26.1449	0.464632	ENSPTRT00000003385	160	1	1	5	6	120407	179084	38.3269	250836	162.992	196.47	1.00389	ENSMMUT00000033260	165	1	1	5	TRUE	TRUE
ENSMMUT00000045083_224	ENSPTRT00000047221_61	ENST00000367229_8	chr1:203229666:-	33	0	0	0	0	0	0	0	0	ENST00000367229	8	0	1	1	33	0	0	0	0	0	0	0	ENSPTRT00000047221	61	0	1	1	9	0	0	0	0	0	0	0	ENSMMUT00000045083	224	0	3	1	TRUE	TRUE
ENSMMUT00000061665_178	ENSPTRT00000003414_244	ENST00000442561_168	chr1:203765343:+	4	0	0	0	0	0	0	0	0	ENST00000442561	168	5	2	4	45	0	0	0	6.4623	0	1.56344	2.23607	ENSPTRT00000003414	244	4	2	4	51	0.331106	0	0	0	0	0.184494	2.23607	ENSMMUT00000061665	178	2	2	1	TRUE	TRUE
ENSMMUT00000014745_272	ENSPTRT00000003416_637	ENST00000639812_5344	chr1:203801713:+	6	18205.7	6.45946	35.8725	1.77038	96.3114	17.9456	21.3506	2.42417	ENST00000639812	5344	1	64	33	6	0.921613	0	2.56148	2.89084	8.67894	2.6364	1.12364	ENSPTRT00000003416	637	1	5	32	6	0.28007	0	0	8.4065	0	1.08858	2.14708	ENSMMUT00000014745	272	1	1	27	TRUE	TRUE
ENSMMUT00000014745_345	ENSPTRT00000003416_710	ENST00000639812_5417	chr1:203801786:+	48	0	2.0883	0	0.885907	0.984639	0.122811	0.539047	1.20392	ENST00000639812	5417	26	65	32	63	0	0	0.0839472	0	0	0.0199147	2.23607	ENSPTRT00000003416	710	21	6	31	42	0.17381	0	1.08675	0	0	0.200411	1.8746	ENSMMUT00000014745	345	5	3	25	TRUE	TRUE
ENSMMUT00000014745_419	ENSPTRT00000003416_766	ENST00000639812_5473	chr1:203801842:+	21	0.801704	5.11353	0	11.7775	0.787968	0.592086	1.39333	1.44738	ENST00000639812	5473	12	66	31	21	0	0	2.02389	0	11.1376	2.37665	1.83668	ENSPTRT00000003416	766	2	7	30	21	0.237574	0	0	0	0	0.0569985	2.23607	ENSMMUT00000014745	419	20	4	24	TRUE	TRUE
ENSMMUT00000014745_579	ENSPTRT00000003416_926	ENST00000639812_5633	chr1:203802002:+	15	0	0	0	2.65391	3.93497	0.183375	0.461608	1.53029	ENST00000639812	5633	28	70	27	15	0	0	0.0834582	0	3.20629	0.310224	2.16586	ENSPTRT00000003416	926	9	11	26	15	0	0	1.18555	0	0	0.140042	2.23607	ENSMMUT00000014745	579	10	5	23	TRUE	TRUE
ENSMMUT00000014745_671	ENSPTRT00000003416_1018	ENST00000639812_5725	chr1:203802094:+	99	1.08598	1.38429	2.9301	8.83015	3.27611	0.814458	1.79743	0.983622	ENST00000639812	5725	4	71	26	99	0	0.263566	1.31189	1.32282	1.64182	0.968534	0.800518	ENSPTRT00000003416	1018	5	12	25	99	0.768515	0	0	0	0	0.135538	2.23607	ENSMMUT00000014745	671	12	6	22	TRUE	TRUE
ENSMMUT00000014745_680	ENSPTRT00000003416_1027	ENST00000639812_5734	chr1:203802103:+	90	1.24672	0.36778	0.455964	7.06488	1.47579	0.824634	1.17384	1.34528	ENST00000639812	5734	15	72	25	90	0	0.302052	1.42427	1.34563	1.78662	1.05198	0.797371	ENSPTRT00000003416	1027	4	13	24	90	0.862111	0	0	0	0	0.147316	2.23607	ENSMMUT00000014745	680	9	7	21	TRUE	TRUE
ENSMMUT00000014745_769	ENSPTRT00000003416_1116	ENST00000639812_5823	chr1:203802192:+	120	0.173753	0.245268	0	1.5162	0.411183	0.22958	0.255061	1.2779	ENST00000639812	5823	35	73	24	120	0	0	0.18053	0.0433285	0	0.0509581	1.7461	ENSPTRT00000003416	1116	17	14	23	120	0.188759	0	0.759056	0	0	0.125821	1.73389	ENSMMUT00000014745	769	14	8	20	TRUE	TRUE
ENSMMUT00000014745_775	ENSPTRT00000003416_1122	ENST00000639812_5829	chr1:203802198:+	114	0.196323	0.26975	0	1.26407	0.428984	0.238049	0.255058	1.11494	ENST00000639812	5829	36	74	23	114	0	0	0.184182	0.0433089	0	0.0517878	1.75309	ENSPTRT00000003416	1122	16	15	22	114	0.202705	0	0.759043	0	0	0.132356	1.709	ENSMMUT00000014745	775	13	9	19	TRUE	TRUE
ENSMMUT00000014745_778	ENSPTRT00000003416_1125	ENST00000639812_5832	chr1:203802201:+	111	0.205202	0.274306	0	0.546293	0.42896	0.252027	0.225899	0.662891	ENST00000639812	5832	38	75	22	111	0	0	0.188001	0.044624	0	0.0537302	1.74989	ENSPTRT00000003416	1125	14	16	21	111	0.202692	0	0.824969	0	0	0.136732	1.73805	ENSMMUT00000014745	778	11	10	18	TRUE	TRUE
ENSMMUT00000014745_819	ENSPTRT00000003416_1166	ENST00000639812_5873	chr1:203802242:+	51	0	0	0	0	0	0.155896	0.0392708	2.44949	ENST00000639812	5873	46	77	20	51	0	0	0	0.0713586	0	0.0199173	2.23607	ENSPTRT00000003416	1166	20	18	19	51	0.0573192	0	0	0	0	0.011832	2.23607	ENSMMUT00000014745	819	23	11	17	TRUE	TRUE
ENSMMUT00000014745_885	ENSPTRT00000003416_1232	ENST00000639812_5939	chr1:203802308:+	258	0	0	0	1.68338	0	0.398148	0.191474	1.94228	ENST00000639812	5939	40	78	19	267	0	0	0.0633134	0.167281	0	0.0534641	1.58438	ENSPTRT00000003416	1232	15	19	18	267	0.0493644	0.133649	0.482139	0	0	0.0998527	1.52335	ENSMMUT00000014745	885	16	12	16	TRUE	TRUE
ENSMMUT00000014745_924	ENSPTRT00000003416_1271	ENST00000639812_5978	chr1:203802347:+	219	0	0	0	2.2074	0	0.380858	0.197509	2.04765	ENST00000639812	5978	39	79	18	228	0	0	0.0693515	0.196108	0	0.0618463	1.60858	ENSPTRT00000003416	1271	13	20	17	228	0.0543989	0.156081	0.531895	0	0	0.11178	1.50606	ENSMMUT00000014745	924	15	13	15	TRUE	TRUE
ENSMMUT00000014745_980	ENSPTRT00000003416_1327	ENST00000639812_6034	chr1:203802403:+	45	0	0	0	5.87566	0	0.286195	0.251827	2.31565	ENST00000639812	6034	37	80	17	165	0	0	0.13819	0.294951	0	0.0946868	1.5114	ENSPTRT00000003416	1327	12	21	16	165	0	0.230791	0.833306	0	0	0.151904	1.69614	ENSMMUT00000014745	980	8	14	14	TRUE	TRUE
ENSMMUT00000014745_1009	ENSPTRT00000003416_1356	ENST00000639812_6063	chr1:203802432:+	141	0	0	0	1.4152	0	0.367159	0.186178	1.90911	ENST00000639812	6063	42	81	16	18	0	0	0	0.325448	0	0.0484318	2.23607	ENSPTRT00000003416	1356	18	22	15	18	0	0	0	0	0	0	0	ENSMMUT00000014745	1009	24	15	13	TRUE	TRUE
ENSMMUT00000014745_1090	ENSPTRT00000003416_1437	ENST00000639812_6142	chr1:203802511:+	21	0	0	0	1.32778	0	0.302075	0.18655	1.95596	ENST00000639812	6142	41	83	14	21	0	0	0	0	0	0	0	ENSPTRT00000003416	1437	23	24	13	21	0	1.49566	3.08165	0	0	0.644727	1.50006	ENSMMUT00000014745	1090	2	16	12	TRUE	TRUE
ENSMMUT00000014745_1116	ENSPTRT00000003416_1463	ENST00000639812_6168	chr1:203802537:+	36	0	0	0	0	0	0.0954038	0.0303264	2.44949	ENST00000639812	6168	49	84	13	36	0	0	0	0	0	0	0	ENSPTRT00000003416	1463	24	25	12	36	0.208222	0	0	0	0	0.0537008	2.23607	ENSMMUT00000014745	1116	21	17	11	TRUE	TRUE
ENSMMUT00000014745_1194	ENSPTRT00000003416_1541	ENST00000639812_6246	chr1:203802615:+	96	1.2241	0.945258	0	0.708666	1.87419	0.167867	0.716994	0.844954	ENST00000639812	6246	20	85	12	66	1.0612	0	0.409485	0.578415	0	0.366657	1.08346	ENSPTRT00000003416	1541	7	26	11	99	0.615306	0	0.377554	0	0.378816	0.25224	0.978699	ENSMMUT00000014745	1194	4	18	10	TRUE	TRUE
ENSMMUT00000014745_1235	ENSPTRT00000003416_1580	ENST00000639812_6285	chr1:203802654:+	57	1.26241	0.987233	0	0.708526	1.8747	0.167636	0.725713	0.839128	ENST00000639812	6285	19	86	11	27	1.16731	0	0	0.591429	0	0.278027	1.48662	ENSPTRT00000003416	1580	10	27	10	27	0.381653	0	0	0	0.553879	0.19558	1.40745	ENSMMUT00000014745	1235	6	19	9	TRUE	TRUE
ENSMMUT00000014745_1242	ENSPTRT00000003416_1587	ENST00000639812_6292	chr1:203802661:+	27	0.748249	0	0	0.732838	0.886197	0.197508	0.388914	0.950213	ENST00000639812	6292	30	87	10	51	1.26661	0.639655	0	0.228476	0	0.311371	1.25818	ENSPTRT00000003416	1587	8	28	9	51	0.553952	0	0.415134	0	0.412389	0.258097	0.936085	ENSMMUT00000014745	1242	3	20	8	TRUE	TRUE
ENSMMUT00000014745_1258	ENSPTRT00000003416_1603	ENST00000639812_6307	chr1:203802676:+	12	0.91823	0	0	0.244364	0	0.233295	0.362287	1.52883	ENST00000639812	6307	32	88	9	12	0	0	0	0	0	0	0	ENSPTRT00000003416	1603	25	29	8	12	0.322908	0	0	0	0	0.0578358	2.23607	ENSMMUT00000014745	1258	19	21	7	TRUE	TRUE
ENSMMUT00000014745_1289	ENSPTRT00000003416_1634	ENST00000639812_6338	chr1:203802707:+	51	0	0	0	0	0	0	0	0	ENST00000639812	6338	90	89	8	153	0	0	0	0	0	0	0	ENSPTRT00000003416	1634	26	30	7	45	0	0	0	0	0	0	0	ENSMMUT00000014745	1289	25	22	6	TRUE	TRUE
ENSMMUT00000014745_1381	ENSPTRT00000003416_1731	ENST00000639812_6436	chr1:203802805:+	21	0	0	0	0	0	0	0	0	ENST00000639812	6436	91	90	7	21	0	0	0	0	0	0	0	ENSPTRT00000003416	1731	28	31	6	21	0	0	0.481735	0	0	0.0696071	2.23607	ENSMMUT00000014745	1381	18	23	5	TRUE	TRUE
ENSMMUT00000014745_1409	ENSPTRT00000003416_1759	ENST00000639812_6464	chr1:203802833:+	9	0	0	0	0	0	0	0	0	ENST00000639812	6464	92	91	6	9	0	0	0	0	0	0	0	ENSPTRT00000003416	1759	29	32	5	9	0	0	0	0	0	0	0	ENSMMUT00000014745	1409	26	24	4	TRUE	TRUE
ENSMMUT00000014745_1424	ENSPTRT00000003416_1774	ENST00000639812_6479	chr1:203802848:+	24	0	0	0	0	0	0	0	0	ENST00000639812	6479	93	92	5	24	0	0	0	0	0	0	0	ENSPTRT00000003416	1774	30	33	4	24	0.187419	0	0	0	0	0.042928	2.23607	ENSMMUT00000014745	1424	22	25	3	TRUE	TRUE
ENSMMUT00000014745_1505	ENSPTRT00000003416_1855	ENST00000639812_6560	chr1:203802929:+	9	0	0	0	0	0	0	0	0	ENST00000639812	6560	95	94	3	9	0	0	0	0	0	0	0	ENSPTRT00000003416	1855	32	35	2	9	0	0	0	0	0	0	0	ENSMMUT00000014745	1505	27	26	2	TRUE	TRUE
ENSMMUT00000014745_1590	ENSPTRT00000003416_1941	ENST00000639812_6646	chr1:203803015:+	15	0	0	0	0	0	0	0	0	ENST00000639812	6646	96	96	1	15	0	0	0	0	0	0	0	ENSPTRT00000003416	1941	33	36	1	15	0.355627	0	0	0	0	0.0739932	2.23607	ENSMMUT00000014745	1590	17	27	1	TRUE	TRUE
ENSMMUT00000023258_545	ENSPTRT00000003433_770	ENST00000367188_176	chr1:204411642:-	156	10.3568	4.03595	9.93062	54.234	37.2665	18.7291	14.4664	0.865971	ENST00000367188	176	1	2	1	156	12.4491	11.1779	18.0242	4.79387	29.9083	11.4996	0.61806	ENSPTRT00000003433	770	1	9	1	156	14.0344	4.98986	8.62869	5.07199	10.1146	7.72319	0.441756	ENSMMUT00000023258	545	2	4	1	TRUE	TRUE
ENSMMUT00000023258_497	ENSPTRT00000003433_722	ENST00000367188_128	chr1:204411690:-	27	9.58421	5.5328	0	4.71905	30.9514	6.69533	7.11864	1.1404	ENST00000367188	128	2	1	2	27	6.89298	1.74845	4.8176	1.85468	6.62489	2.80775	0.568039	ENSPTRT00000003433	722	2	8	2	27	53.4719	7.3082	10.8959	3.95584	8.15885	8.63907	1.23358	ENSMMUT00000023258	497	1	3	2	TRUE	TRUE
ENSMMUT00000061063_492	ENSPTRT00000091142_2062	ENST00000367187_487	chr1:204469873:-	39	16.7456	3.66805	9.41768	0	13.6292	0.641882	4.61863	0.951472	ENST00000367187	487	3	5	1	39	2.33404	0	1.12456	1.62549	0	1.03488	1.00595	ENSPTRT00000091142	2062	1	27	1	39	5.40788	1.55094	0	0	0	0.590292	1.68374	ENSMMUT00000061063	492	3	3	1	TRUE	TRUE
ENSMMUT00000005840_14	ENSPTRT00000003462_1467	ENST00000357992_148	chr1:205631815:-	111	12.0499	14.9201	70.8568	142.928	45.4977	13.5502	24.6644	1.02401	ENST00000357992	148	1	1	1	111	0	25.9511	77.3049	21.0948	16.7032	16.186	1.03259	ENSPTRT00000003462	1467	1	18	1	194	14.7623	0.57909	0	0.0915156	1.77683	1.40244	1.85003	ENSMMUT00000005840	14	1	1	1	TRUE	TRUE
ENSMMUT00000005846_307	ENSPTRT00000003463_2465	ENST00000367145_215	chr1:205664788:-	99	33.2093	4.02871	38.711	95.7018	442.467	2.88208	10.3029	1.65095	ENST00000367145	215	1	3	1	99	0	0	0	0	0	0	0	ENSPTRT00000003463	2465	28	35	1	99	0	0	0	0	0	0	0	ENSMMUT00000005846	307	5	6	1	TRUE	TRUE
ENSMMUT00000005846_266	ENSPTRT00000003463_2424	ENST00000367145_174	chr1:205664829:-	9	0	0	0	0	1388.47	0.46655	0.581784	2.4485	ENST00000367145	174	3	2	2	9	0	0	0	0	0	0	0	ENSPTRT00000003463	2424	27	34	2	9	0	0	0	0	0	0	0	ENSMMUT00000005846	266	4	5	2	TRUE	TRUE
ENSMMUT00000005846_219	ENSPTRT00000003463_2377	ENST00000367145_127	chr1:205664876:-	45	42.3782	15.6198	0	4688.38	1.95566	1.36262	6.64398	2.41163	ENST00000367145	127	2	1	3	45	0	0	0	8.61383	0	1.04603	2.23607	ENSPTRT00000003463	2377	1	33	3	45	1.29928	10.1591	238.565	0	0	3.18692	2.10968	ENSMMUT00000005846	219	2	3	4	TRUE	TRUE
ENSMMUT00000029866_168	ENSPTRT00000003467_226	ENST00000414729_396	chr1:205775064:-	45	4.0323	8.33852	2.96489	10.5718	5.10831	2.26235	4.46398	0.58692	ENST00000414729	396	1	1	1	45	3.19383	1.46053	2.89902	4.19789	32.8066	3.04857	1.50294	ENSPTRT00000003467	226	2	2	1	45	1.65397	1.57345	2.26626	2.37402	1.52772	1.95164	0.216565	ENSMMUT00000029866	168	1	2	1	TRUE	TRUE
ENSMMUT00000045175_529	ENSPTRT00000079878_1156	ENST00000581977_146	chr1:206470621:+	21	3.73951	3.13935	16.7721	2.52803	9.34688	12.8059	7.00867	0.731412	ENST00000581977	146	1	1	3	21	0	2.70351	2.52919	2.3343	0	2.03377	0.916941	ENSPTRT00000079878	1156	7	12	3	21	579.178	0	0	0	0.372001	0.640835	2.23427	ENSMMUT00000045175	529	3	3	3	TRUE	TRUE
ENSMMUT00000045175_533	ENSPTRT00000079878_1160	ENST00000581977_150	chr1:206470625:+	141	0.824032	1.64775	3.67763	2.47656	2.85938	5.47718	2.4819	0.576324	ENST00000581977	150	2	2	2	141	0.0537804	1.31608	0.984056	1.44505	0	0.926416	0.908301	ENSPTRT00000079878	1160	8	13	2	141	3.16181	0	7.05066	0	0.151823	1.07698	1.49178	ENSMMUT00000045175	533	2	4	2	TRUE	TRUE
ENSMMUT00000045175_602	ENSPTRT00000079878_1229	ENST00000581977_219	chr1:206470694:+	72	0.0672893	0.706957	1.76794	1.3854	1.75004	4.51151	1.4152	0.899343	ENST00000581977	219	3	3	1	72	0.0665279	0.854079	0.609346	1.85789	0	0.714254	1.10971	ENSPTRT00000079878	1229	9	14	1	72	2.26791	0	10.594	0	0	1.22459	1.78453	ENSMMUT00000045175	602	1	5	1	TRUE	TRUE
ENSMMUT00000003596_72	ENSPTRT00000003484_108	ENST00000271764_24	chr1:206612442:-	54	0.498908	0.897504	0.637191	3.2657	1.75598	0.855123	1.04506	0.796299	ENST00000271764	24	1	1	1	54	3.20555	2.08582	1.64639	0.542197	2.44614	1.80633	0.497952	ENSPTRT00000003484	108	1	1	1	54	0.539339	0.827469	1.08679	1.97264	0.824648	1.04809	0.524521	ENSMMUT00000003596	72	1	1	1	TRUE	TRUE
ENSMMUT00000031039_23	ENSPTRT00000094076_837	ENST00000367024_380	chr1:209759056:+	137	1.27927	3.87944	0.355565	1.28753	1.08301	1.77307	1.463	0.747657	ENST00000367024	380	2	3	2	137	0.204382	2.04691	0.94002	2.59282	1.08499	1.37025	0.688448	ENSPTRT00000094076	837	2	14	2	144	0.168086	0.863277	0.630047	1.33127	0.530367	0.704263	0.611115	ENSMMUT00000031039	23	1	1	2	TRUE	TRUE
ENSMMUT00000031039_41	ENSPTRT00000094076_855	ENST00000367024_398	chr1:209759074:+	119	1.46944	3.74847	0.405128	1.26458	1.20327	1.78099	1.52932	0.684997	ENST00000367024	398	1	4	1	119	0.231265	1.91567	0.749897	2.64858	0	1.19186	1.02311	ENSPTRT00000094076	855	3	15	1	126	0.168027	0.863265	0.630024	1.3313	0.530333	0.704241	0.611177	ENSMMUT00000031039	41	2	2	1	TRUE	TRUE
ENSMMUT00000018092_33	ENSPTRT00000093988_21	ENST00000261637_26	chr12:101280130:+	33	1419.55	55.8801	0	2615.86	25.3464	10.162	45.7995	1.59577	ENST00000261637	26	1	1	1	33	0	0	13.3729	1.08389	0	2.13102	2.033	ENSPTRT00000093988	21	1	1	1	33	14.4256	15.8295	0	8.38314	0	5.20198	0.982045	ENSMMUT00000018092	33	1	1	1	TRUE	TRUE
ENSMMUT00000017610_187	ENSPTRT00000009847_111	ENST00000299314_208	chr12:101830752:-	15	29.0578	9.40818	0	42.2706	3330.92	28.0846	22.1469	2.35665	ENST00000299314	208	2	2	1	86	0	2.39919	0	0	0	0.485036	2.23607	ENSPTRT00000009847	111	2	2	1	15	0	0	0	0	0	0	0	ENSMMUT00000017610	187	2	2	1	TRUE	TRUE
ENSMMUT00000017610_131	ENSPTRT00000009847_55	ENST00000299314_152	chr12:101830808:-	24	178.338	11.0952	45.3081	235.211	15610	38.932	59.3443	2.35692	ENST00000299314	152	1	1	2	72	44.4163	13.5944	1509.54	1831.18	23.8081	49.3525	1.3253	ENSPTRT00000009847	55	1	1	2	24	759.859	30.4005	28.9733	0	2.96517	17.6092	2.02597	ENSMMUT00000017610	131	1	1	2	TRUE	TRUE
ENSMMUT00000045739_48	ENSPTRT00000009854_47	ENST00000329406_44	chr12:102197790:-	18	0	0	0	0	0	0	0	0	ENST00000329406	44	0	1	1	18	0	0	0	0	0	0	0	ENSPTRT00000009854	47	0	1	1	18	0	0	0	0	0	0	0	ENSMMUT00000045739	48	0	1	1	TRUE	TRUE
ENSMMUT00000003166_269	ENSPTRT00000092886_173	ENST00000307046_84	chr12:102480480:-	6	0	0	0	8.84532	0	0	2.54057	2.44949	ENST00000307046	84	1	2	1	6	0	0.579504	0.493759	1.40641	8.60513	0.656871	1.62684	ENSPTRT00000092886	173	1	4	1	6	2.18355	0	0	0	0	0.511586	2.23607	ENSMMUT00000003166	269	1	8	1	TRUE	TRUE
ENSMMUT00000003166_244	ENSPTRT00000092886_148	ENST00000307046_59	chr12:102480505:-	9	0	0	0	0	0	0	0	0	ENST00000307046	59	2	1	2	9	0	0	0	0	0	0	0	ENSPTRT00000092886	148	2	3	2	156	0	0	0	0	0	0	0	ENSMMUT00000003166	244	4	7	2	TRUE	TRUE
ENSMMUT00000029959_261	ENSPTRT00000009875_916	ENST00000548660_504	chr12:104050020:-	12	0	0	0	0	0	0	0	0	ENST00000548660	504	0	3	1	12	0	0	0	0	0	0	0	ENSPTRT00000009875	916	9	9	1	12	0	0	0	0	0	0	0	ENSMMUT00000029959	261	0	2	1	TRUE	TRUE
ENSMMUT00000029959_19	ENSPTRT00000009875_666	ENST00000548660_254	chr12:104050270:-	15	0	0	0	0	0	0	0	0	ENST00000548660	254	0	2	2	15	0	0	0	0	0	0	0	ENSPTRT00000009875	666	8	8	2	204	0	0	0	0	0	0	0	ENSMMUT00000029959	19	0	1	2	TRUE	TRUE
ENSMMUT00000030903_141	ENSPTRT00000067984_2522	ENST00000544822_333	chr12:10453222:-	39	0	0	0	0	0	0	0	0	ENST00000544822	333	0	11	1	39	0	0	2.6178	0	0	3.16932	2.23607	ENSPTRT00000067984	2522	10	54	1	39	0.16588	1.1966	0	0	0	0.123738	1.91401	ENSMMUT00000030903	141	1	1	1	TRUE	TRUE
ENSMMUT00000024085_600	ENSPTRT00000009883_464	ENST00000258538_121	chr12:104928535:-	8	0	0	0	0	0	0.42779	0.153313	2.44949	ENST00000258538	121	2	2	1	8	0	0	0	0	0	0	0	ENSPTRT00000009883	464	10	10	1	8	0	0	0	0	0	0	0	ENSMMUT00000024085	600	12	13	1	TRUE	TRUE
ENSMMUT00000024085_500	ENSPTRT00000009883_364	ENST00000258538_21	chr12:104928635:-	18	0	1.15376	0	0	7.86389	0.986637	1.65636	1.84784	ENST00000258538	21	1	1	2	18	0	0	2.24812	0	6.07111	1.12348	1.59214	ENSPTRT00000009883	364	1	9	2	18	0	0	0	0	0	0	0	ENSMMUT00000024085	500	11	12	2	TRUE	TRUE
ENSMMUT00000030689_538	ENSPTRT00000009904_839	ENST00000008527_531	chr12:107093019:-	24	0	0	0	0	0	0	0	0	ENST00000008527	531	2	2	1	24	0	22.3185	2.92125	5.19685	0	5.80488	1.5331	ENSPTRT00000009904	839	1	3	1	24	0	0	0	0	0	0	0	ENSMMUT00000030689	538	2	2	1	TRUE	TRUE
ENSMMUT00000030689_319	ENSPTRT00000009904_620	ENST00000008527_312	chr12:107093238:-	42	1858.62	0	0	0	149.657	0	31.0074	2.23761	ENST00000008527	312	1	1	2	42	0	0	13.3398	0	0	3.63157	2.23607	ENSPTRT00000009904	620	2	2	2	42	0	0	0	0	3360.04	19.5964	2.23607	ENSMMUT00000030689	319	1	1	2	TRUE	TRUE
ENSMMUT00000001594_64	ENSPTRT00000010067_385	ENST00000552495_374	chr12:113185915:+	75	2.3184	1.97579	3.69746	5.30578	4.28138	7.3433	3.45834	0.479533	ENST00000552495	374	3	3	2	75	0.820878	0.954487	1.40561	0.217501	1.23754	1.08766	0.494504	ENSPTRT00000010067	385	3	3	2	75	1.45516	1.52503	1.02208	0.271839	1.52635	1.21192	0.464688	ENSMMUT00000001594	64	1	1	2	TRUE	TRUE
ENSMMUT00000001594_147	ENSPTRT00000010067_468	ENST00000552495_457	chr12:113185998:+	16	0.124808	0	0	0.965902	0.492433	0.733026	0.332778	1.05815	ENST00000552495	457	4	4	1	16	0	0	0	0.471487	0	0.0536837	2.23607	ENSPTRT00000010067	468	4	4	1	16	0.606759	0	0	0	0	0.0730214	2.23607	ENSMMUT00000001594	147	2	2	1	TRUE	TRUE
ENSMMUT00000072054_426	ENSPTRT00000010069_637	ENST00000416617_100	chr12:113208258:-	36	0	63.7933	0	0	0	0.367528	3.97487	2.43269	ENST00000416617	100	1	1	1	36	0	0	1.87123	0	0	0.915992	2.23607	ENSPTRT00000010069	637	3	13	1	36	2.18122	0	0	0	0	0.256797	2.23607	ENSMMUT00000072054	426	2	3	2	TRUE	TRUE
ENSMMUT00000014689_166	ENSPTRT00000010084_59	ENST00000261741_13	chr12:113966313:-	27	6.71141	1.66259	0	28.1972	80.0647	0.997595	4.89217	1.60453	ENST00000261741	13	1	1	1	27	0	0	0.605812	0	0	0.164796	2.23607	ENSPTRT00000010084	59	2	2	1	27	0.728068	0.930858	0.936039	0	0.0621438	0.648081	0.874842	ENSMMUT00000014689	166	1	3	1	TRUE	TRUE
ENSMMUT00000001759_3	ENSPTRT00000095809_117	ENST00000257575_46	chr12:116738336:+	15	0	2.01654	0	0	17.6442	2.56141	4.56505	1.86922	ENST00000257575	46	3	2	4	15	0	0	999.755	0	0	0.611131	2.23607	ENSPTRT00000095809	117	3	2	4	15	1215.17	0	0	0	0	4.40439	2.23607	ENSMMUT00000001759	3	1	1	3	TRUE	TRUE
ENSMMUT00000001759_153	ENSPTRT00000095809_264	ENST00000257575_193	chr12:116740457:+	36	6.67482	1.34546	2.1712	12.3204	0	22.8298	4.77691	1.15578	ENST00000257575	193	2	4	2	36	0	3.39371	7.79886	15.0036	5.05649	3.65409	0.903851	ENSPTRT00000095809	264	2	4	2	36	0	0	0	0	0	0	0	ENSMMUT00000001759	153	2	2	2	TRUE	TRUE
ENSMMUT00000001759_177	ENSPTRT00000095809_288	ENST00000257575_217	chr12:116740481:+	12	6.71387	0	1456.41	10.5823	0	3265.31	5.21803	1.70245	ENST00000257575	217	1	5	1	12	0	3.39768	2185.78	3661.36	5.06141	4.57304	1.43681	ENSPTRT00000095809	288	1	5	1	12	0	0	0	0	0	0	0	ENSMMUT00000001759	177	3	3	1	TRUE	TRUE
ENSMMUT00000057026_1176	ENSPTRT00000042589_142	ENST00000392533_400	chr12:118255621:-	21	0.961953	1.4189	0	2.72328	0	0.349907	0.703065	1.15585	ENST00000392533	400	3	3	1	56	0	0	0.104966	0.403665	0	0.109722	1.71835	ENSPTRT00000042589	142	3	3	1	58	0.87355	0.28781	0	0	0	0.247657	1.63399	ENSMMUT00000057026	1176	8	16	1	TRUE	TRUE
ENSMMUT00000057026_1098	ENSPTRT00000042589_64	ENST00000392533_322	chr12:118266698:-	51	2.61763	1.00966	0.612244	6.68375	22.6026	1.57322	2.64796	1.45242	ENST00000392533	322	1	1	3	51	0	0.912008	3.82939	2.72456	3.3965	2.07381	0.758339	ENSPTRT00000042589	64	1	1	3	48	3.19407	0.44349	1.85225	2.0417	0.886148	1.57283	0.637812	ENSMMUT00000057026	1098	1	15	2	TRUE	TRUE
ENSMMUT00000045460_1358	ENSPTRT00000010204_91	ENST00000377071_100	chr12:121580924:-	13	0	0	0	0	0	0	0	0	ENST00000377071	100	2	2	1	13	0	0	0	0	0	0	0	ENSPTRT00000010204	91	2	2	1	13	0	0	0	0	0	0	0	ENSMMUT00000045460	1358	0	28	1	TRUE	TRUE
ENSMMUT00000045460_1323	ENSPTRT00000010204_56	ENST00000377071_64	chr12:121580960:-	27	0	1.34565	0	356.104	2082.2	6.38928	5.16623	2.04206	ENST00000377071	64	1	1	2	15	0	0	0	0.813217	0	0.183772	2.23607	ENSPTRT00000010204	56	1	1	2	15	0	0	0	0	0	0	0	ENSMMUT00000045460	1323	0	27	2	TRUE	TRUE
ENSMMUT00000063597_283	ENSPTRT00000048661_178	ENST00000355329_122	chr12:121669533:-	50	0	0	0	0	0	0	0	0	ENST00000355329	122	0	2	1	50	0	0	0	0	0	0	0	ENSPTRT00000048661	178	0	2	1	50	0	0	0	0	0	0	0	ENSMMUT00000063597	283	0	4	1	TRUE	TRUE
ENSMMUT00000063597_224	ENSPTRT00000048661_119	ENST00000355329_63	chr12:121669592:-	18	0	0	0	0	0	0	0	0	ENST00000355329	63	0	1	2	18	0	0	0	0	0	0	0	ENSPTRT00000048661	119	0	1	2	18	0	0	0	0	0	0	0	ENSMMUT00000063597	224	0	3	2	TRUE	TRUE
ENSMMUT00000047170_193	ENSPTRT00000008696_441	ENST00000261349_208	chr12:12266837:-	78	2001.52	19.6619	0	615.604	0	10.0303	32.9033	1.81857	ENST00000261349	208	2	3	1	78	0	0	0	0	0	0	0	ENSPTRT00000008696	441	0	4	1	78	0	0	0	0	0	0	0	ENSMMUT00000047170	193	0	3	1	TRUE	TRUE
ENSMMUT00000047170_66	ENSPTRT00000008696_317	ENST00000261349_84	chr12:12266961:-	51	0	651.823	1713.25	940.982	1347.66	0	705.559	0.902913	ENST00000261349	84	1	2	2	51	0	0	0	0	0	0	0	ENSPTRT00000008696	317	0	3	2	51	0	0	0	0	0	0	0	ENSMMUT00000047170	66	0	2	2	TRUE	TRUE
ENSMMUT00000047170_17	ENSPTRT00000008696_268	ENST00000261349_35	chr12:12267010:-	132	0	11.605	662.549	364.175	521.3	0	32.4037	1.13873	ENST00000261349	35	3	1	3	132	0	0	0	0	0	0	0	ENSPTRT00000008696	268	0	2	3	135	0	0	0	0	0	0	0	ENSMMUT00000047170	17	0	1	3	TRUE	TRUE
ENSMMUT00000068650_82	ENSPTRT00000075752_109	ENST00000280557_64	chr12:122752887:+	24	1.70409	0.570207	0	2.00661	3.54382	1.69557	1.49223	0.776141	ENST00000280557	64	1	1	1	24	0	0.0353024	0.489046	3.59561	1.64566	0.941239	1.31723	ENSPTRT00000075752	109	1	1	1	24	1.91296	1.76531	0.59284	2.1801	1.332	1.48281	0.39842	ENSMMUT00000068650	82	1	1	1	TRUE	TRUE
ENSMMUT00000027642_81	ENSPTRT00000085217_423	ENST00000606320_130	chr12:123230442:-	63	5.59053	0.289642	0	6.94487	0	1.75435	1.46858	1.26471	ENST00000606320	130	6	6	1	63	0	2.57265	1.34889	0	3.03185	1.56275	1.01439	ENSPTRT00000085217	423	5	9	1	63	0.780508	2.12394	0	3.69647	0	1.39583	1.20184	ENSMMUT00000027642	81	4	4	1	TRUE	TRUE
ENSMMUT00000027642_66	ENSPTRT00000085217_408	ENST00000606320_115	chr12:123230457:-	78	5.5856	0.238843	4.56018	6.91285	0.564166	2.07532	1.98149	0.832023	ENST00000606320	115	4	5	2	78	0	2.37454	3.11054	0.813723	3.03032	2.22053	0.746133	ENSPTRT00000085217	408	4	8	2	78	2.59439	4.17006	0	5.54446	3.1481	3.0595	0.666631	ENSMMUT00000027642	66	3	3	2	TRUE	TRUE
ENSMMUT00000027642_53	ENSPTRT00000085217_395	ENST00000606320_102	chr12:123230470:-	81	11.5557	4.03367	6.50556	58.4873	0.564224	3.13215	5.1824	1.57244	ENST00000606320	102	2	3	4	81	0	3.41691	2.64803	4.3272	6.03539	2.98275	0.678287	ENSPTRT00000085217	395	1	6	4	81	9.07103	5.87427	1.69286	6.52114	7.9465	5.61157	0.453326	ENSMMUT00000027642	53	2	2	3	TRUE	TRUE
ENSMMUT00000027642_37	ENSPTRT00000085217_379	ENST00000606320_86	chr12:123230486:-	30	27.9404	6.8593	0	70.0668	21.4677	9.37845	12.1772	1.12129	ENST00000606320	86	1	2	5	30	4.54894	2.42622	0	3.50057	16.1355	2.53668	1.17921	ENSPTRT00000085217	379	2	5	5	33	26.606	10.1686	3.11033	5.54534	16.7969	9.38544	0.761635	ENSMMUT00000027642	37	1	1	4	TRUE	TRUE
ENSMMUT00000012880_2	ENSPTRT00000010312_101	ENST00000238156_209	chr12:123972616:-	63	0.96204	3.97035	1.62864	0	0	0	0.665444	1.42655	ENST00000238156	209	2	2	1	63	0	0	0	1.44389	0	0.308161	2.23607	ENSPTRT00000010312	101	2	2	1	63	1.8184	0	0	0	0	0.965452	2.23607	ENSMMUT00000012880	2	1	1	1	TRUE	TRUE
ENSMMUT00000026116_1044	ENSPTRT00000008701_1568	ENST00000298573_545	chr12:12521186:-	21	0	0	1.68483	0.253386	0	0.0485242	0.169778	2.0247	ENST00000298573	545	6	8	1	21	0	0	0.843516	0	0	0.249916	2.23607	ENSPTRT00000008701	1568	9	41	1	21	0.910044	0	0	0	0	0.06022	2.23607	ENSMMUT00000026116	1044	4	17	1	TRUE	TRUE
ENSMMUT00000026116_984	ENSPTRT00000008701_1508	ENST00000298573_485	chr12:12521246:-	81	0	0.873257	1.06598	1.43837	1.90052	0.518642	0.845936	0.694084	ENST00000298573	485	5	7	2	81	0	0.579699	0.422085	0.466775	0	0.401332	0.933584	ENSPTRT00000008701	1508	6	40	2	81	1.65293	0	0	0	0	0.108045	2.23607	ENSMMUT00000026116	984	3	16	2	TRUE	TRUE
ENSMMUT00000026116_892	ENSPTRT00000008701_1416	ENST00000298573_393	chr12:12521338:-	6	4.03911	0.299217	0	1.18049	5.24857	0	0.932704	1.27124	ENST00000298573	393	4	6	3	6	0	0	0	0.765295	0	0.211418	2.23607	ENSPTRT00000008701	1416	13	39	3	6	0	0	0	0	0	0	0	ENSMMUT00000026116	892	17	15	3	TRUE	TRUE
ENSMMUT00000026116_883	ENSPTRT00000008701_1407	ENST00000298573_384	chr12:12521347:-	15	3.3651	1.13585	0	7.07947	9.34392	0.669264	2.0458	1.06007	ENST00000298573	384	2	5	4	15	0	0	0	0.848482	0	0.242612	2.23607	ENSPTRT00000008701	1407	11	38	4	15	0	0	0	0	0	0	0	ENSMMUT00000026116	883	16	14	4	TRUE	TRUE
ENSMMUT00000026116_860	ENSPTRT00000008701_1384	ENST00000298573_361	chr12:12521370:-	27	0	2.01908	0	8.71188	9.04471	0.78081	2.29568	1.25176	ENST00000298573	361	1	4	5	27	0	0	0.450072	0.29597	0	0.249066	1.41716	ENSPTRT00000008701	1384	10	37	5	27	0	4.17609	0	0	0	0.631406	2.23607	ENSMMUT00000026116	860	1	13	5	TRUE	TRUE
ENSMMUT00000026116_824	ENSPTRT00000008701_1348	ENST00000298573_325	chr12:12521406:-	63	0.585856	1.24715	0	4.71894	9.02651	0.466607	1.37553	1.32691	ENST00000298573	325	3	3	6	63	0	0	0.519406	0.236041	0	0.221331	1.52141	ENSPTRT00000008701	1348	12	36	6	63	0	2.24881	0	0	0	0.369377	2.23607	ENSMMUT00000026116	824	2	12	6	TRUE	TRUE
ENSMMUT00000026116_819	ENSPTRT00000008701_1343	ENST00000298573_320	chr12:12521411:-	6	0	0	0	0	0	0.125176	0.0470504	2.44949	ENST00000298573	320	8	2	7	6	0	0	0.449948	0.54209	0	0.27686	1.37912	ENSPTRT00000008701	1343	8	35	7	6	0	0	0	0	0	0	0	ENSMMUT00000026116	819	15	11	7	TRUE	TRUE
ENSMMUT00000026116_816	ENSPTRT00000008701_1340	ENST00000298573_317	chr12:12521414:-	9	0	0	0	0.393624	0	0.174958	0.110714	1.71244	ENST00000298573	317	7	1	8	9	0	0	0.449998	1.4064	0	0.576111	1.64452	ENSPTRT00000008701	1340	2	34	8	9	0	0	0	0	0	0	0	ENSMMUT00000026116	816	14	10	8	TRUE	TRUE
ENSMMUT00000016433_104	ENSPTRT00000003598_115	ENST00000366962_103	chr1:213015765:-	42	0	21.7451	8.96226	34.8903	446.971	12.6658	8.96082	2.01608	ENST00000366962	103	1	3	1	42	0	0	2.61732	7.03588	0	2.08095	1.59052	ENSPTRT00000003598	115	2	3	1	48	0.140936	0	0	0	0	0.0457483	2.23607	ENSMMUT00000016433	104	2	3	1	TRUE	TRUE
ENSMMUT00000016433_66	ENSPTRT00000003598_76	ENST00000366962_64	chr1:213015804:-	81	1.60123	13.584	4.48235	34.4162	232.244	1.82917	4.75843	1.89682	ENST00000366962	64	2	2	2	81	0	0	1.87084	7.02575	0	1.73204	1.71002	ENSPTRT00000003598	76	3	2	2	39	0	0	0	0	0	0	0	ENSMMUT00000016433	66	3	2	2	TRUE	TRUE
ENSMMUT00000016433_24	ENSPTRT00000003598_37	ENST00000366962_25	chr1:213015843:-	120	1.60028	12.0621	4.47919	37.3466	157.09	2.2385	4.74247	1.70145	ENST00000366962	25	3	1	3	120	0	4.29949	1.86915	7.01565	0	2.40189	1.14455	ENSPTRT00000003598	37	1	1	3	81	0.780677	0	0	0	0	0.303584	2.23607	ENSMMUT00000016433	24	1	1	3	TRUE	TRUE
ENSMMUT00000062873_125	ENSPTRT00000003602_125	ENST00000366960_122	chr1:213051362:+	43	726.769	0	0	3.50187	0	2.54351	4.50192	2.42527	ENST00000366960	122	1	1	1	43	0	0	11.1156	0	0	2.2774	2.23607	ENSPTRT00000003602	125	1	1	1	43	0	0	0	0	0	0	0	ENSMMUT00000062873	125	0	1	1	TRUE	TRUE
ENSMMUT00000021938_234	ENSPTRT00000003607_855	ENST00000366955_139	chr1:214613725:+	12	0	0	0	0	0	0.427915	0.0640697	2.44949	ENST00000366955	139	1	1	1	12	0	0	1.34942	0.963686	0	0.523307	1.40068	ENSPTRT00000003607	855	1	10	1	12	3.23431	0	3.06835	0	0	0.886229	1.3701	ENSMMUT00000021938	234	1	1	1	TRUE	TRUE
ENSMMUT00000027106_16	ENSPTRT00000008729_201	ENST00000261167_143	chr12:14801413:-	39	2.76174	0	0	9.25352	0	2.5114	1.40773	1.48223	ENST00000261167	143	2	2	1	12	0	0	0	0	0	0	0	ENSPTRT00000008729	201	3	4	1	12	0	0	0	0	0	0	0	ENSMMUT00000027106	16	0	1	1	TRUE	TRUE
ENSMMUT00000015373_696	ENSPTRT00000008377_113	ENST00000280665_7	chr12:2004451:-	20	0	0	0	959.782	0	2.56268	2.0303	2.44167	ENST00000280665	7	1	1	1	20	0	0	0	0	0	0	0	ENSPTRT00000008377	113	0	1	1	20	3.63172	0	0	0	0	0.99455	2.23607	ENSMMUT00000015373	696	1	6	1	TRUE	TRUE
ENSMMUT00000029276_82	ENSPTRT00000008803_52	ENST00000229329_52	chr12:22046269:+	35	6.5036	4.25584	1.865	13.0883	7.0508	8.89757	6.07299	0.557028	ENST00000229329	52	1	1	1	35	1.07753	8.57993	2.89118	2.64373	1.77978	3.24723	0.879881	ENSPTRT00000008803	52	1	1	1	35	2.91068	3.11244	1.03741	1.39462	2.92296	2.34778	0.430111	ENSMMUT00000029276	82	1	1	1	TRUE	TRUE
ENSMMUT00000021067_156	ENSPTRT00000097380_134	ENST00000340934_134	chr1:222712697:+	18	0	0	0	0	0	1.70877	0.306517	2.44949	ENST00000340934	134	3	2	2	18	0	0	5.61065	0	0	1.07692	2.23607	ENSPTRT00000097380	134	2	2	3	18	9.05556	0	0	0	0	0.467017	2.23607	ENSMMUT00000021067	156	3	1	3	TRUE	TRUE
ENSMMUT00000021067_239	ENSPTRT00000097380_217	ENST00000340934_217	chr1:222712780:+	66	3.72365	7.37859	0	15.7573	0	10.1947	5.10854	1.00262	ENST00000340934	217	1	3	1	66	9.60553	0	4.28809	10.2465	6.4708	5.00303	0.68384	ENSPTRT00000097380	217	1	3	2	66	6.7956	3.54314	31.198	0	5.92934	6.27661	1.30785	ENSMMUT00000021067	239	1	2	2	TRUE	TRUE
ENSMMUT00000026173_27	ENSPTRT00000000625_45	ENST00000404138_27	chr1:22451877:+	33	3.13828	5.04426	2.17164	7.04636	0	1.53856	3.04827	0.804536	ENST00000404138	27	1	1	7	33	0	0	7.47609	1.44466	0	1.29199	1.81756	ENSPTRT00000000625	45	2	1	6	33	2.18143	0	9.17362	0	0.594084	1.65225	1.63018	ENSMMUT00000026173	27	1	1	3	TRUE	TRUE
ENSMMUT00000026173_60	ENSPTRT00000000625_78	ENST00000404138_60	chr1:22451910:+	225	0	0.451243	0	1.41321	0	1.09887	0.541759	1.26275	ENST00000404138	60	3	2	6	225	0	0	3.72826	0	0	0.916013	2.23607	ENSPTRT00000000625	78	3	2	5	159	1.81702	0	1.72223	0	0	0.487683	1.37012	ENSMMUT00000026173	60	2	2	2	TRUE	TRUE
ENSMMUT00000026173_109	ENSPTRT00000000625_127	ENST00000404138_109	chr1:22451959:+	42	0	2.01544	0	0.885623	0	2.55988	0.763745	1.24586	ENST00000404138	109	2	3	5	42	0	0	3.93002	0	0	1.42301	2.23607	ENSPTRT00000000625	127	1	3	4	42	0.607425	0	0	0	0	0.0920173	2.23607	ENSMMUT00000026173	109	3	3	1	TRUE	TRUE
ENSMMUT00000065478_497	ENSPTRT00000078528_132	ENST00000381356_125	chr12:25203922:+	35	1.96336	0	0	1.76832	0	0.514162	0.961008	1.30156	ENST00000381356	125	1	1	3	35	3.99707	0	0	0.903537	0	0.507049	1.76643	ENSPTRT00000078528	132	1	1	3	35	1.81885	0	0	0	0	0.480405	2.23607	ENSMMUT00000065478	497	1	8	2	TRUE	TRUE
ENSMMUT00000065478_525	ENSPTRT00000078528_160	ENST00000381356_153	chr12:25203950:+	7	0	0	0	0	0	0	0	0	ENST00000381356	153	3	3	1	7	0	0	0	0	0	0	0	ENSPTRT00000078528	160	3	3	1	7	0	0	0	0	0	0	0	ENSMMUT00000065478	525	9	9	1	TRUE	TRUE
ENSMMUT00000072057_603	ENSPTRT00000003734_1772	ENST00000366835_133	chr1:225879355:-	87	1.63095	1.45334	10.4164	1.7667	9.82189	6.02744	4.8598	0.808104	ENST00000366835	133	1	1	1	87	0	4.81097	6.35731	3.12483	0	3.05615	0.996628	ENSPTRT00000003734	1772	1	9	1	129	6.60043	0	0	0	0	0.822077	2.23607	ENSMMUT00000072057	603	1	5	1	TRUE	TRUE
ENSMMUT00000072282_151	ENSPTRT00000008826_176	ENST00000242729_52	chr12:26195547:+	30	0	0	0	0	0	0	0	0	ENST00000242729	52	0	1	1	30	0	0	0	0	0	0	0	ENSPTRT00000008826	176	0	1	1	30	0	0	0	0	0	0	0	ENSMMUT00000072282	151	0	1	1	TRUE	TRUE
ENSMMUT00000012084_411	ENSPTRT00000003749_364	ENST00000429204_208	chr1:226737591:-	51	86.2854	16.0612	12.9449	2068.96	9060.34	78.2327	73.4902	1.91084	ENST00000429204	208	1	3	1	51	36.2938	16.9282	4040.08	89.507	3010.42	39.2276	1.34811	ENSPTRT00000003749	364	1	3	1	51	6.53437	16.5703	0	12.2719	14.0063	11.5612	0.672216	ENSMMUT00000012084	411	1	3	1	TRUE	TRUE
ENSMMUT00000012084_353	ENSPTRT00000003749_306	ENST00000429204_150	chr1:226737649:-	191	16.948	2.73619	9.36495	56.3054	33.1996	12.9775	14.0825	0.89852	ENST00000429204	150	2	2	2	191	9.78202	7.37903	17.8012	9.79075	12.0948	9.1208	0.348585	ENSPTRT00000003749	306	2	2	2	191	3.73202	14.2296	0	10.6476	7.71068	6.83897	0.77083	ENSMMUT00000012084	353	2	2	2	TRUE	TRUE
ENSMMUT00000012084_299	ENSPTRT00000003749_252	ENST00000429204_96	chr1:226739080:-	6	5.98255	7.40186	17465.9	4794.91	45.2084	7.69134	14.0759	1.881	ENST00000429204	96	3	1	3	6	0	0	14.6078	26.724	0	7.20567	1.46408	ENSPTRT00000003749	252	3	1	3	6	1.81907	0	0	0	5.93493	3.35407	1.65996	ENSMMUT00000012084	299	3	1	3	TRUE	TRUE
ENSMMUT00000009071_378	ENSPTRT00000008832_378	ENST00000261191_42	chr12:26937940:-	60	5.83022	1.69338	5.12692	3.69987	9.50448	1.77281	3.16914	0.637592	ENST00000261191	42	1	1	1	60	2.81781	2.29845	2.83457	3.20326	2.5866	2.61997	0.121748	ENSPTRT00000008832	378	1	2	1	60	1.16462	3.0353	2.5239	4.29724	1.48411	2.68063	0.50308	ENSMMUT00000009071	378	1	2	1	TRUE	TRUE
ENSMMUT00000009074_150	ENSPTRT00000008835_150	ENST00000229395_57	chr12:26938526:+	72	0.582236	1.13582	2.54989	1.06807	1.27408	3.10231	1.632	0.605134	ENST00000229395	57	1	1	1	72	1.78142	0.679118	2.02926	1.44538	3.90491	1.69322	0.607871	ENSPTRT00000008835	150	1	1	1	72	0.862091	0.975183	2.10404	2.23117	1.41503	1.62376	0.415146	ENSMMUT00000009074	150	1	1	1	TRUE	TRUE
ENSMMUT00000056473_91	ENSPTRT00000008400_165	ENST00000618250_208	chr12:2885285:+	82	2.91061	3.80667	1.51547	2.67324	3.66834	3.47585	3.11212	0.283698	ENST00000618250	208	2	2	2	82	7.14348	1.10852	2.24851	4.05394	1.54468	2.58018	0.76546	ENSPTRT00000008400	165	1	1	2	82	2.44272	0	0.609026	0	0.05538	0.497543	1.68967	ENSMMUT00000056473	91	2	1	2	TRUE	TRUE
ENSMMUT00000056473_139	ENSPTRT00000008400_213	ENST00000618250_256	chr12:2885333:+	34	3.55943	6.35922	0	4.15581	4.15599	5.01185	4.18696	0.550493	ENST00000618250	256	1	3	1	34	6.16738	1.82091	2.49306	4.3339	1.01277	2.44069	0.656401	ENSPTRT00000008400	213	2	2	1	34	3.97892	0	0.979435	0	0	0.970577	1.73741	ENSMMUT00000056473	139	1	2	1	TRUE	TRUE
ENSMMUT00000008229_21	ENSPTRT00000003834_21	ENST00000366669_1	chr1:230642481:+	108	0	1.00964	9.27992	0	0	1.13956	0.920857	1.9169	ENST00000366669	1	1	1	1	125	0	0.869585	8.64409	2.59502	0	1.61161	1.50147	ENSPTRT00000003834	21	1	1	1	108	3.63015	2.05241	0	4.18616	0	1.65535	0.995283	ENSMMUT00000008229	21	1	1	1	TRUE	TRUE
ENSMMUT00000001921_594	ENSPTRT00000082978_591	ENST00000298892_590	chr12:30753925:-	6	0	0	0	0	0	0	0	0	ENST00000298892	590	9	9	4	6	0	0	0	0	0	0	0	ENSPTRT00000082978	591	0	8	2	36	0	0	0	0	0	0	0	ENSMMUT00000001921	594	9	9	3	TRUE	TRUE
ENSMMUT00000001921_578	ENSPTRT00000082978_575	ENST00000298892_574	chr12:30753941:-	15	0	0	0	0	0	0	0	0	ENST00000298892	574	8	8	5	15	0	0	0	0	0	0	0	ENSPTRT00000082978	575	0	7	3	15	0	0	0	0	0	0	0	ENSMMUT00000001921	578	8	8	4	TRUE	TRUE
ENSMMUT00000001921_505	ENSPTRT00000082978_500	ENST00000298892_499	chr12:30754016:-	6	0	0	0	0	0	0	0	0	ENST00000298892	499	7	7	6	6	0	0	0	0	0	0	0	ENSPTRT00000082978	500	0	6	4	6	0	0	0	0	0	0	0	ENSMMUT00000001921	505	7	7	5	TRUE	TRUE
ENSMMUT00000001921_440	ENSPTRT00000082978_434	ENST00000298892_434	chr12:30754081:-	9	0	0	0	0	0	0	0	0	ENST00000298892	434	6	6	7	9	0	0	0	0	0	0	0	ENSPTRT00000082978	434	0	5	5	9	0	0	0	0	0	0	0	ENSMMUT00000001921	440	6	6	6	TRUE	TRUE
ENSMMUT00000001921_354	ENSPTRT00000082978_348	ENST00000298892_348	chr12:30754167:-	261	0	0	0	0	0	0.327836	0.0981211	2.44949	ENST00000298892	348	2	5	8	168	0	0	0	0	0	0	0	ENSPTRT00000082978	348	0	4	6	180	0	0	0	0	0	0	0	ENSMMUT00000001921	354	4	4	8	TRUE	TRUE
ENSMMUT00000001921_341	ENSPTRT00000082978_335	ENST00000298892_335	chr12:30754180:-	54	0	0	0	0	0	0	0	0	ENST00000298892	335	5	4	9	54	0	0	0	0	0	0	0	ENSPTRT00000082978	335	0	3	7	54	0.390663	0	0	0	0	0.156506	2.23607	ENSMMUT00000001921	341	1	3	9	TRUE	TRUE
ENSMMUT00000001921_130	ENSPTRT00000082978_122	ENST00000298892_122	chr12:30754393:-	63	0	0	0	0	0	0	0	0	ENST00000298892	122	3	2	11	63	0	0	0	0	0	0	0	ENSPTRT00000082978	122	0	2	8	63	0	0	0	0	0	0	0	ENSMMUT00000001921	130	3	2	10	TRUE	TRUE
ENSMMUT00000001921_101	ENSPTRT00000082978_93	ENST00000298892_93	chr12:30754422:-	39	0	0	0	0	0	0	0	0	ENST00000298892	93	12	1	12	39	0	0	0	0	0	0	0	ENSPTRT00000082978	93	0	1	9	39	0	0	0	0	0	0	0	ENSMMUT00000001921	101	2	1	11	TRUE	TRUE
ENSMMUT00000065690_807	ENSPTRT00000091455_1264	ENST00000302291_768	chr1:23094296:-	33	0	0	0	0	0	0.367439	0.172673	2.44949	ENST00000302291	768	6	8	1	33	0	0	0	2.16636	0	0.428268	2.23607	ENSPTRT00000091455	1264	5	22	1	33	0	0	0	0	0	0	0	ENSMMUT00000065690	807	7	7	1	TRUE	TRUE
ENSMMUT00000065690_730	ENSPTRT00000091455_1187	ENST00000302291_691	chr1:23094373:-	48	0	5.63787	0	999.731	1301.75	0.481492	2.53869	1.5629	ENST00000302291	691	4	7	2	48	3.29379	0.129978	0.562836	2.33334	4.04556	1.56448	0.818075	ENSPTRT00000091455	1187	3	21	2	48	633.382	0	0	0	0	7.05502	2.23607	ENSMMUT00000065690	730	1	6	2	TRUE	TRUE
ENSMMUT00000065690_727	ENSPTRT00000091455_1184	ENST00000302291_688	chr1:23094376:-	51	0	5.63685	1.63084	940.982	1225.24	0.481524	2.74117	1.56076	ENST00000302291	688	2	6	3	51	3.29364	0.130053	0.656468	2.33324	4.04521	1.59392	0.800942	ENSPTRT00000091455	1184	2	20	3	51	596.183	0	0	0	0	7.03145	2.23607	ENSMMUT00000065690	727	2	5	3	TRUE	TRUE
ENSMMUT00000065690_720	ENSPTRT00000091455_1177	ENST00000302291_681	chr1:23109024:-	120	5.57187	2.35095	0.726169	6.14084	521.3	0.528682	1.8202	2.36573	ENST00000302291	681	5	5	4	120	2.69954	0.0586791	0.843701	1.51057	1.70438	1.1276	0.723838	ENSPTRT00000091455	1177	4	19	4	120	8.81781	0	0	0	0	1.83012	2.23607	ENSMMUT00000065690	720	3	4	4	TRUE	TRUE
ENSMMUT00000007389_3039	ENSPTRT00000106276_3031	ENST00000366641_3041	chr1:231422004:-	12	0	0	0	0	0	6.40249	2.17621	2.44949	ENST00000366641	3041	3	45	1	12	0	0	7.84768	0	0	0.674913	2.23607	ENSPTRT00000106276	3031	4	42	1	12	0	0	0	0	0	0	0	ENSMMUT00000007389	3039	27	39	1	TRUE	TRUE
ENSMMUT00000007389_2932	ENSPTRT00000106276_2924	ENST00000366641_2934	chr1:231422111:-	12	13654.5	8.41116	0	9.43183	22.0393	8.20688	13.3884	2.43918	ENST00000366641	2934	1	44	2	12	26.8371	15.0618	35.9722	3.011	26.5469	19.1209	0.591789	ENSPTRT00000106276	2924	2	41	2	12	0	0	0	0	0	0	0	ENSMMUT00000007389	2932	26	38	2	TRUE	TRUE
ENSMMUT00000007389_2773	ENSPTRT00000106276_2777	ENST00000366641_2778	chr1:231422267:-	48	326.084	0	0	2.35307	6.848	7.04254	4.18413	2.31067	ENST00000366641	2778	2	43	3	48	0	10.9704	13.0626	0.602659	7.2737	5.0695	0.92903	ENSPTRT00000106276	2777	3	40	3	48	0	9.41045	2.99768	4.01984	13.1345	5.58138	0.892685	ENSMMUT00000007389	2773	1	37	3	TRUE	TRUE
ENSMMUT00000007389_2390	ENSPTRT00000106276_2385	ENST00000366641_2386	chr1:231422659:-	63	0	0	0	0	0	0	0	0	ENST00000366641	2386	27	42	4	63	0	1491.66	0	0	0	34.9237	2.23607	ENSPTRT00000106276	2385	1	39	4	69	0	0	0	0	0	0	0	ENSMMUT00000007389	2390	24	36	4	TRUE	TRUE
ENSMMUT00000007389_2309	ENSPTRT00000106276_2304	ENST00000366641_2305	chr1:231422740:-	33	0	0	0	0	0	0	0	0	ENST00000366641	2305	25	41	5	33	0	0	0	0	0	0	0	ENSPTRT00000106276	2304	27	38	5	150	0	0	0	0	0	0	0	ENSMMUT00000007389	2309	23	35	5	TRUE	TRUE
ENSMMUT00000007389_2198	ENSPTRT00000106276_2190	ENST00000366641_2191	chr1:231422854:-	63	0	0	0	0	0	0	0	0	ENST00000366641	2191	24	40	6	63	0	0	0	0	0	0	0	ENSPTRT00000106276	2190	25	37	6	60	0	0	0	0	0	0	0	ENSMMUT00000007389	2198	22	34	6	TRUE	TRUE
ENSMMUT00000007389_2190	ENSPTRT00000106276_2182	ENST00000366641_2183	chr1:231422862:-	9	867.891	0	0	0	0	0	1.52144	2.44949	ENST00000366641	2183	4	39	7	9	0	0	0	0	0	0	0	ENSPTRT00000106276	2182	24	36	7	9	0	0	0	0	0	0	0	ENSMMUT00000007389	2190	21	33	7	TRUE	TRUE
ENSMMUT00000007389_2012	ENSPTRT00000106276_2000	ENST00000366641_2001	chr1:231423044:-	12	0	0	0	0	0	0	0	0	ENST00000366641	2001	20	37	9	117	0	0	0	0	0	0	0	ENSPTRT00000106276	2000	22	34	9	12	0	0	0	0	0	0	0	ENSMMUT00000007389	2012	18	31	9	TRUE	TRUE
ENSMMUT00000007389_1966	ENSPTRT00000106276_1957	ENST00000366641_1958	chr1:231423087:-	21	0	0	0	0	0	0	0	0	ENST00000366641	1958	19	36	10	21	0	0	0	0	0	0	0	ENSPTRT00000106276	1957	19	33	10	24	0	0	0	0	0	0	0	ENSMMUT00000007389	1966	16	29	11	TRUE	TRUE
ENSMMUT00000007389_1893	ENSPTRT00000106276_1884	ENST00000366641_1885	chr1:231423160:-	6	0	0	0	0	0	0	0	0	ENST00000366641	1885	18	35	11	9	0	0	0	0	0	0	0	ENSPTRT00000106276	1884	18	32	11	6	0	0	0	0	0	0	0	ENSMMUT00000007389	1893	14	28	12	TRUE	TRUE
ENSMMUT00000007389_1878	ENSPTRT00000106276_1869	ENST00000366641_1870	chr1:231423175:-	6	0	0	0	0	0	0	0	0	ENST00000366641	1870	17	34	12	6	0	0	0	0	0	0	0	ENSPTRT00000106276	1869	17	31	12	6	0	0	0	0	0	0	0	ENSMMUT00000007389	1878	12	27	13	TRUE	TRUE
ENSMMUT00000007389_1819	ENSPTRT00000106276_1810	ENST00000366641_1811	chr1:231423234:-	75	0	0	0	0	0	0	0	0	ENST00000366641	1811	16	33	13	75	0	0	0	0	0	0	0	ENSPTRT00000106276	1810	16	30	13	75	0	0	0	0	0	0	0	ENSMMUT00000007389	1819	11	26	14	TRUE	TRUE
ENSMMUT00000007389_1578	ENSPTRT00000106276_1568	ENST00000366641_1571	chr1:231423474:-	57	0	0	0	0	0	0	0	0	ENST00000366641	1571	15	32	14	57	0	0	0	0	0	0	0	ENSPTRT00000106276	1568	15	29	14	60	0	0	0	0	0	0	0	ENSMMUT00000007389	1578	10	25	15	TRUE	TRUE
ENSMMUT00000007389_1528	ENSPTRT00000106276_1516	ENST00000366641_1519	chr1:231423526:-	66	0	0	0	0	0	0	0	0	ENST00000366641	1519	14	31	15	66	0	0	0	0	0	0	0	ENSPTRT00000106276	1516	14	28	15	66	0	0	0	0	0	0	0	ENSMMUT00000007389	1528	9	24	16	TRUE	TRUE
ENSMMUT00000007389_1486	ENSPTRT00000106276_1474	ENST00000366641_1477	chr1:231423568:-	108	0	0	0	0	0	0	0	0	ENST00000366641	1477	13	30	16	108	0	0	0	0	0	0	0	ENSPTRT00000106276	1474	13	27	16	108	0	0	0	0	0	0	0	ENSMMUT00000007389	1486	8	23	17	TRUE	TRUE
ENSMMUT00000007389_1472	ENSPTRT00000106276_1461	ENST00000366641_1464	chr1:231423581:-	96	0	0	0	0	0	0	0	0	ENST00000366641	1464	12	29	17	96	0	0	0	0	0	0	0	ENSPTRT00000106276	1461	11	25	18	33	0	0	0	0	0	0	0	ENSMMUT00000007389	1472	7	22	18	TRUE	TRUE
ENSMMUT00000007389_1390	ENSPTRT00000106276_1379	ENST00000366641_1383	chr1:231423662:-	6	0	0	0	0	0	0	0	0	ENST00000366641	1383	11	28	18	6	0	0	0	0	0	0	0	ENSPTRT00000106276	1379	10	24	19	6	0	0	0	0	0	0	0	ENSMMUT00000007389	1390	6	21	19	TRUE	TRUE
ENSMMUT00000007389_1276	ENSPTRT00000106276_1265	ENST00000366641_1269	chr1:231423776:-	21	0	0	0	0	0	0	0	0	ENST00000366641	1269	10	27	19	21	0	0	0	0	0	0	0	ENSPTRT00000106276	1265	9	23	20	21	0	0	0	0	0	0	0	ENSMMUT00000007389	1276	5	20	20	TRUE	TRUE
ENSMMUT00000007389_1264	ENSPTRT00000106276_1253	ENST00000366641_1257	chr1:231423788:-	33	0	0	0	0	0	0	0	0	ENST00000366641	1257	9	26	20	33	0	0	0	0	0	0	0	ENSPTRT00000106276	1253	8	22	21	33	0	0	0	0	0	0	0	ENSMMUT00000007389	1264	4	19	21	TRUE	TRUE
ENSMMUT00000007389_1184	ENSPTRT00000106276_1192	ENST00000366641_1196	chr1:231423849:-	135	0	0	0	0	0	0	0	0	ENST00000366641	1196	7	24	22	141	0	0	0	0	0	0	0	ENSPTRT00000106276	1192	7	21	22	30	0	0	0	0	0	0	0	ENSMMUT00000007389	1184	2	17	23	TRUE	TRUE
ENSMMUT00000007389_988	ENSPTRT00000106276_992	ENST00000366641_996	chr1:231424049:-	9	0	0	0	0	0	0	0	0	ENST00000366641	996	45	21	25	9	0	0	0	0	0	0	0	ENSPTRT00000106276	992	42	18	25	9	0	0	0	0	0	0	0	ENSMMUT00000007389	988	39	16	24	TRUE	TRUE
ENSMMUT00000007389_953	ENSPTRT00000106276_957	ENST00000366641_961	chr1:231424084:-	39	0	0	0	0	0	0	0	0	ENST00000366641	961	42	18	28	39	0	0	0	0	0	0	0	ENSPTRT00000106276	957	39	15	28	39	0	0	0	0	0	0	0	ENSMMUT00000007389	953	38	15	25	TRUE	TRUE
ENSMMUT00000007389_823	ENSPTRT00000106276_826	ENST00000366641_830	chr1:231424215:-	42	0	0	0	0	0	0	0	0	ENST00000366641	830	39	15	31	42	0	0	0	0	0	0	0	ENSPTRT00000106276	826	38	14	29	42	0	0	0	0	0	0	0	ENSMMUT00000007389	823	36	13	27	TRUE	TRUE
ENSMMUT00000007389_623	ENSPTRT00000106276_627	ENST00000366641_631	chr1:231424414:-	15	0	0	0	0	0	0	0	0	ENST00000366641	631	34	10	36	15	0	0	0	0	0	0	0	ENSPTRT00000106276	627	34	10	33	15	0	0	0	0	0	0	0	ENSMMUT00000007389	623	33	10	30	TRUE	TRUE
ENSMMUT00000007389_597	ENSPTRT00000106276_601	ENST00000366641_605	chr1:231424440:-	9	0	0	0	0	0	0	0	0	ENST00000366641	605	33	9	37	9	0	0	0	0	0	0	0	ENSPTRT00000106276	601	33	9	34	9	0	0	0	0	0	0	0	ENSMMUT00000007389	597	32	9	31	TRUE	TRUE
ENSMMUT00000007389_443	ENSPTRT00000106276_447	ENST00000366641_451	chr1:231424594:-	12	0	0	0	0	0	0	0	0	ENST00000366641	451	32	8	38	12	0	0	0	0	0	0	0	ENSPTRT00000106276	447	32	8	35	12	0	0	0	0	0	0	0	ENSMMUT00000007389	443	30	7	33	TRUE	TRUE
ENSMMUT00000007389_392	ENSPTRT00000106276_396	ENST00000366641_400	chr1:231424645:-	63	0	0	0	0	0	0	0	0	ENST00000366641	400	31	7	39	63	0	0	0	0	0	0	0	ENSPTRT00000106276	396	31	7	36	63	0	0	0	0	0	0	0	ENSMMUT00000007389	392	29	6	34	TRUE	TRUE
ENSMMUT00000007389_341	ENSPTRT00000106276_345	ENST00000366641_349	chr1:231424696:-	12	0	0	0	0	0	0	0	0	ENST00000366641	349	30	6	40	12	0	0	0	0	0	0	0	ENSPTRT00000106276	345	30	6	37	12	0	0	0	0	0	0	0	ENSMMUT00000007389	341	28	5	35	TRUE	TRUE
ENSMMUT00000007389_259	ENSPTRT00000106276_268	ENST00000366641_272	chr1:231424773:-	12	0	0	0	0	0	0	0	0	ENST00000366641	272	28	5	41	12	0	0	0	0	0	0	0	ENSPTRT00000106276	268	28	5	38	12	0	0	0	0	0	0	0	ENSMMUT00000007389	259	25	4	36	TRUE	TRUE
ENSMMUT00000007389_218	ENSPTRT00000106276_227	ENST00000366641_231	chr1:231424814:-	90	0	0	0	0	0	0	0	0	ENST00000366641	231	26	4	42	90	0	0	0	0	0	0	0	ENSPTRT00000106276	227	26	4	39	90	0	0	0	0	0	0	0	ENSMMUT00000007389	218	20	3	37	TRUE	TRUE
ENSMMUT00000007389_191	ENSPTRT00000106276_200	ENST00000366641_204	chr1:231424841:-	117	0	0	0	0	0	0	0	0	ENST00000366641	204	22	3	43	12	0	0	0	0	0	0	0	ENSPTRT00000106276	200	21	3	40	117	0	0	0	0	0	0	0	ENSMMUT00000007389	191	15	2	38	TRUE	TRUE
ENSMMUT00000007389_188	ENSPTRT00000106276_197	ENST00000366641_201	chr1:231424844:-	120	0	0	0	0	0	0	0	0	ENST00000366641	201	21	2	44	120	0	0	0	0	0	0	0	ENSPTRT00000106276	197	20	2	41	120	0	0	0	0	0	0	0	ENSMMUT00000007389	188	13	1	39	TRUE	TRUE
ENSMMUT00000015352_226	ENSPTRT00000101837_575	ENST00000314011_210	chr1:23369627:-	36	0	0	0	0	0	0	0	0	ENST00000314011	210	3	3	1	21	0	0	0	0	0	0	0	ENSPTRT00000101837	575	6	6	1	21	0	0	0	0	0	0	0	ENSMMUT00000015352	226	3	3	2	TRUE	TRUE
ENSMMUT00000015352_168	ENSPTRT00000101837_517	ENST00000314011_152	chr1:23369685:-	213	0	0	0	0	0	0.516421	0.137857	2.44949	ENST00000314011	152	2	2	2	96	0	0	0	0	0	0	0	ENSPTRT00000101837	517	4	5	2	96	0	0	0	0	0	0	0	ENSMMUT00000015352	168	2	2	3	TRUE	TRUE
ENSMMUT00000015352_65	ENSPTRT00000101837_414	ENST00000314011_49	chr1:23369788:-	114	0	0	0	0	0	0.468212	0.202908	2.44949	ENST00000314011	49	1	1	3	114	0	0	198.123	0	0	0.847281	2.23607	ENSPTRT00000101837	414	1	4	3	114	0	12.4622	0	34.699	0	14.8021	1.60304	ENSMMUT00000015352	65	1	1	4	TRUE	TRUE
ENSMMUT00000016577_439	ENSPTRT00000000654_1799	ENST00000361729_348	chr1:23530886:-	18	11.17	24.0803	97.6155	35.302	5550.87	6964.87	47.0314	1.53311	ENST00000361729	348	1	1	1	18	69.603	4.62464	32.4441	20.5377	0	22.4758	1.09491	ENSPTRT00000000654	1799	1	24	1	18	2024.62	29.6534	8.87645	2026.2	48.7365	31.6968	1.32129	ENSMMUT00000016577	439	1	1	1	TRUE	TRUE
ENSMMUT00000021209_413	ENSPTRT00000003911_710	ENST00000526589_454	chr1:236526004:+	15	2.46835	1.0801	1.72824	1.01188	0.590862	0.373182	0.850247	0.63993	ENST00000526589	454	1	4	1	15	0.500363	0	1.19715	0.390349	0	0.470056	1.17569	ENSPTRT00000003911	710	1	1	1	15	0.0588399	0	0	0	0	0.0133837	2.23607	ENSMMUT00000021209	413	2	6	1	TRUE	TRUE
ENSMMUT00000021216_66	ENSPTRT00000003914_54	ENST00000366582_35	chr1:236604482:-	18	3.92414	1.07696	3.62547	3729.6	45.042	0.36673	2.73558	2.40767	ENST00000366582	35	1	1	1	18	0	0	0.128663	2.33441	0	0.320174	2.09312	ENSPTRT00000003914	54	2	2	1	18	0.606837	0	0	0	0	0.059985	2.23607	ENSMMUT00000021216	66	1	1	1	TRUE	TRUE
ENSMMUT00000019658_369	ENSPTRT00000008930_1033	ENST00000308666_138	chr12:39619666:-	12	0	0	0	0	23.5453	2612.45	6.95621	2.42333	ENST00000308666	138	1	3	1	12	0	4.37603	0.409147	5.20207	0	2.28802	1.28688	ENSPTRT00000008930	1033	2	14	1	12	0	0	0	0	0	0	0	ENSMMUT00000019658	369	0	6	1	TRUE	TRUE
ENSMMUT00000019658_318	ENSPTRT00000008930_982	ENST00000308666_87	chr12:39619717:-	24	0	0	0	1598.97	15.6429	2.19743	3.42658	2.41716	ENST00000308666	87	2	2	2	24	0	0	2.881	1.89676	0	1.62386	1.4169	ENSPTRT00000008930	982	4	13	2	24	0	0	0	0	0	0	0	ENSMMUT00000019658	318	0	5	2	TRUE	TRUE
ENSMMUT00000019658_234	ENSPTRT00000008930_898	ENST00000308666_3	chr12:39619801:-	51	0	0	0	564.989	25.2104	0	3.24042	2.32619	ENST00000308666	3	3	1	3	51	2.09993	0.85864	1.12454	0.434647	2879.58	1.82991	2.23169	ENSPTRT00000008930	898	3	12	3	51	0	0	0	0	0	0	0	ENSMMUT00000019658	234	0	4	3	TRUE	TRUE
ENSMMUT00000044472_183	ENSPTRT00000003966_194	ENST00000366548_175	chr1:241848755:+	48	4.10782	0	10.8626	600.239	7.37251	4.0243	5.46755	2.32606	ENST00000366548	175	3	1	6	48	1.75059	1.31618	2.5071	2.97725	2.45808	1.91156	0.300242	ENSPTRT00000003966	194	1	1	6	48	3.78792	1.25146	1.72871	2.70448	0	1.4148	0.759026	ENSMMUT00000044472	183	5	1	6	TRUE	TRUE
ENSMMUT00000044472_238	ENSPTRT00000003966_249	ENST00000366548_230	chr1:241848810:+	108	9.97302	15.1796	0	18.7704	10.4667	3.52163	9.97563	0.725556	ENST00000366548	230	2	2	5	99	0	0.486169	1.56396	5.50518	0	1.02359	1.53688	ENSPTRT00000003966	249	2	2	5	96	16.3292	3.13939	0.790564	5.18038	1.77228	3.35947	1.15848	ENSMMUT00000044472	238	1	2	5	TRUE	TRUE
ENSMMUT00000044472_266	ENSPTRT00000003966_280	ENST00000366548_261	chr1:241848841:+	66	8.71246	21.4847	0	19.0367	18.8303	2.30589	12.3957	0.794799	ENST00000366548	261	1	3	4	15	0	0	0.397085	1.54835	0	0.353629	1.72319	ENSPTRT00000003966	280	3	3	4	15	2.72841	0.759915	0	19.7393	0.907069	1.84115	1.73946	ENSMMUT00000044472	266	4	3	4	TRUE	TRUE
ENSMMUT00000044472_284	ENSPTRT00000003966_298	ENST00000366548_277	chr1:241848857:+	168	1.79307	1.58533	0.273957	2.52297	2.83363	0.691295	1.41973	0.618149	ENST00000366548	277	4	4	3	168	0	0	0.197821	1.08401	0	0.222655	1.83538	ENSPTRT00000003966	298	4	4	3	168	10.3684	1.40513	0.922205	2.2708	0.57249	1.85677	1.32201	ENSMMUT00000044472	284	3	4	3	TRUE	TRUE
ENSMMUT00000044472_381	ENSPTRT00000003966_395	ENST00000366548_374	chr1:241848954:+	6	0	0	0	0	0	0.466503	0.119915	2.44949	ENST00000366548	374	6	5	2	6	0	0	0	0	0	0	0	ENSPTRT00000003966	395	5	5	2	6	12.7363	0	1.24207	4.56476	0	2.11824	1.45096	ENSMMUT00000044472	381	2	5	2	TRUE	TRUE
ENSMMUT00000044472_392	ENSPTRT00000003966_406	ENST00000366548_385	chr1:241848965:+	60	0	0	0.297506	0	4.57231	0.1721	0.3625	2.18053	ENST00000366548	385	5	6	1	60	0	0	0	0	0	0	0	ENSPTRT00000003966	406	6	6	1	60	1.33412	0.338676	0	0	0	0.177077	1.72674	ENSMMUT00000044472	392	6	6	1	TRUE	TRUE
ENSMMUT00000024349_49	ENSPTRT00000008951_107	ENST00000266529_71	chr12:42326024:-	42	1.98784	3.50933	0.796304	3.01005	3.6229	4.77264	3.2078	0.471087	ENST00000266529	71	1	1	1	42	4.16123	2.15067	2.78861	2.93064	2.63664	2.75218	0.254481	ENSPTRT00000008951	107	1	1	1	42	0	0	0	0	0	0	0	ENSMMUT00000024349	49	0	1	4	TRUE	TRUE
ENSMMUT00000047493_41	ENSPTRT00000078780_521	ENST00000374409_228	chr1:24401416:-	27	0	0	0	5.29101	0	0	1.01738	2.44949	ENST00000374409	228	1	7	1	27	0	0	0	0	0	0	0	ENSPTRT00000078780	521	7	8	1	27	0	0	0	0	0	0	0	ENSMMUT00000047493	41	0	2	1	TRUE	TRUE
ENSMMUT00000071385_36	ENSPTRT00000083298_410	ENST00000302550_44	chr1:244653169:+	42	16.7863	0.712963	8.15236	1370.69	27.3942	4.69447	6.9115	2.33102	ENST00000302550	44	1	1	1	42	18.427	2.38728	15.8786	3.78939	0.810703	7.31626	0.997359	ENSPTRT00000083298	410	1	3	1	42	2.33854	6.56706	0	6.12187	13.2102	5.50258	0.890234	ENSMMUT00000071385	36	1	1	1	TRUE	TRUE
ENSMMUT00000015937_151	ENSPTRT00000004013_347	ENST00000366513_211	chr1:246591514:+	15	12.3205	0	0	0.590457	0	3.84088	1.35634	1.75558	ENST00000366513	211	2	2	4	15	0	0	2.0234	0	11.129	1.31983	1.83652	ENSPTRT00000004013	347	2	5	4	15	0.546145	0	0	0	0	0.0774929	2.23607	ENSMMUT00000015937	151	3	1	3	TRUE	TRUE
ENSMMUT00000015937_177	ENSPTRT00000004013_373	ENST00000366513_237	chr1:246591540:+	23	0	0	0	0	1629.77	1.02606	0.78805	2.44764	ENST00000366513	237	3	4	2	23	0	0	0	0	0	0	0	ENSPTRT00000004013	373	7	7	2	23	0.90998	0	0	0	0	0.105189	2.23607	ENSMMUT00000015937	177	1	2	2	TRUE	TRUE
ENSMMUT00000015937_192	ENSPTRT00000004013_388	ENST00000366513_252	chr1:246591555:+	8	0	0	0	0	0	0.513303	0.146018	2.44949	ENST00000366513	252	4	5	1	8	0	0	0	0	0	0	0	ENSPTRT00000004013	388	8	8	1	8	0.520109	0	0	0	0	0.0787846	2.23607	ENSMMUT00000015937	192	2	3	1	TRUE	TRUE
ENSMMUT00000027506_6	ENSPTRT00000004038_311	ENST00000294753_234	chr1:247331510:-	78	4.02657	0	12.2017	3.47043	6.27554	2.56125	3.69634	0.878941	ENST00000294753	234	1	2	1	78	0	1.31605	2.33455	0.650947	0	1.56597	1.14851	ENSPTRT00000004038	311	2	3	1	78	7.69503	3.31657	0	0	66.8176	4.831	1.85176	ENSMMUT00000027506	6	1	1	7	TRUE	TRUE
ENSMMUT00000067292_450	ENSPTRT00000009004_482	ENST00000449771_256	chr12:47758625:-	36	0	0	0	0	0	0	0	0	ENST00000449771	256	0	1	1	36	0	0	6.68627	3.60297	0	3.99261	1.4682	ENSPTRT00000009004	482	1	3	1	36	0	0	0	0	0	0	0	ENSMMUT00000067292	450	2	2	1	TRUE	TRUE
ENSMMUT00000054873_126	ENSPTRT00000009011_157	ENST00000429772_113	chr12:47964212:+	25	0.978389	1.41347	3.73067	1.45141	2.65279	1.64676	2.01318	0.516924	ENST00000429772	113	1	1	1	25	2.40691	0	1.74879	0.859143	0	0.554235	1.06453	ENSPTRT00000009011	157	1	1	1	25	1.0067	1.06731	0.223227	0.517537	0.47715	0.643475	0.553185	ENSMMUT00000054873	126	1	1	1	TRUE	TRUE
ENSMMUT00000060562_469	ENSPTRT00000080018_618	ENST00000544117_623	chr12:48350149:-	36	0	0	0	0	0	0	0	0	ENST00000544117	623	0	8	1	36	0	0	0	0	0	0	0	ENSPTRT00000080018	618	0	8	1	36	3.61143	0.444997	0	0	2758.73	4.6623	2.23197	ENSMMUT00000060562	469	1	8	1	TRUE	TRUE
ENSMMUT00000060562_437	ENSPTRT00000080018_586	ENST00000544117_591	chr12:48350181:-	119	0	0	0	0	0	0	0	0	ENST00000544117	591	0	7	2	119	0	0	0	0	0	0	0	ENSPTRT00000080018	586	0	7	2	119	1.80544	0.337589	0	0	27.3115	2.95419	2.03665	ENSMMUT00000060562	437	2	7	2	TRUE	TRUE
ENSMMUT00000060562_416	ENSPTRT00000080018_565	ENST00000544117_570	chr12:48350202:-	140	0	0	0	0	0	0	0	0	ENST00000544117	570	0	6	3	140	0	0	0	0	0	0	0	ENSPTRT00000080018	565	0	6	3	140	1.80296	0.338489	0	0	27.1606	2.9491	2.03577	ENSMMUT00000060562	416	3	6	3	TRUE	TRUE
ENSMMUT00000060562_349	ENSPTRT00000080018_498	ENST00000544117_503	chr12:48350269:-	75	0	0	0	0	0	0	0	0	ENST00000544117	503	0	5	4	75	0	0	0	0	0	0	0	ENSPTRT00000080018	498	0	5	4	75	0	0	0	0	0	0	0	ENSMMUT00000060562	349	8	5	4	TRUE	TRUE
ENSMMUT00000060562_297	ENSPTRT00000080018_447	ENST00000544117_452	chr12:48350320:-	126	0	0	0	0	0	0	0	0	ENST00000544117	452	0	4	5	126	0	0	0	0	0	0	0	ENSPTRT00000080018	447	0	4	5	51	0	0	0	0	0	0	0	ENSMMUT00000060562	297	7	4	5	TRUE	TRUE
ENSMMUT00000060562_263	ENSPTRT00000080018_413	ENST00000544117_418	chr12:48350354:-	84	0	0	0	0	0	0	0	0	ENST00000544117	418	0	3	6	84	0	0	0	0	0	0	0	ENSPTRT00000080018	413	0	3	6	293	1.78532	0.344973	0	0	26.111	2.91277	2.02943	ENSMMUT00000060562	263	4	3	6	TRUE	TRUE
ENSMMUT00000060562_119	ENSPTRT00000080018_269	ENST00000544117_274	chr12:48350498:-	228	0	0	0	0	0	0	0	0	ENST00000544117	274	0	2	7	228	0	0	0	0	0	0	0	ENSPTRT00000080018	269	0	2	7	437	1.76941	0.350959	0	0	25.1972	2.87979	2.02353	ENSMMUT00000060562	119	5	2	7	TRUE	TRUE
ENSMMUT00000060562_107	ENSPTRT00000080018_257	ENST00000544117_262	chr12:48350510:-	240	0	0	0	0	0	0	0	0	ENST00000544117	262	0	1	8	240	0	0	0	0	0	0	0	ENSPTRT00000080018	257	0	1	8	449	1.76811	0.351453	0	0	25.1241	2.87709	2.02304	ENSMMUT00000060562	107	6	1	8	TRUE	TRUE
ENSMMUT00000067005_475	ENSPTRT00000004068_1324	ENST00000366472_466	chr1:248824982:-	24	0.224988	2.01858	0.932854	799.985	0	0	0.763402	2.43787	ENST00000366472	466	2	2	1	24	0	0	0	0	0	0	0	ENSPTRT00000004068	1324	6	13	1	24	0.682712	0	0	0	0	0.0751035	2.23607	ENSMMUT00000067005	475	4	4	1	TRUE	TRUE
ENSMMUT00000067005_188	ENSPTRT00000004068_1037	ENST00000366472_179	chr1:248825269:-	177	4.89751	5.95626	2.48271	6.52566	4.04428	3.75055	4.51285	0.32395	ENST00000366472	179	1	1	2	177	4.09689	2.93312	2.57305	2.42496	4.49081	3.14166	0.282396	ENSPTRT00000004068	1037	1	12	2	177	2.41056	1.44002	2.14033	4.3039	1.62369	2.2323	0.479023	ENSMMUT00000067005	188	1	2	3	TRUE	TRUE
ENSMMUT00000017916_327	ENSPTRT00000009061_332	ENST00000267102_330	chr12:49110569:-	14	0	1.15385	0	9.1997	0	1.28249	1.34288	1.8598	ENST00000267102	330	2	2	1	14	3.25114	0	0.999664	2.88948	1.39246	1.18121	0.791381	ENSPTRT00000009061	332	2	2	1	14	0.40454	5.50671	2.00055	0	0	1.22607	1.4811	ENSMMUT00000017916	327	2	2	1	TRUE	TRUE
ENSMMUT00000017916_25	ENSPTRT00000009061_30	ENST00000267102_28	chr12:49110871:-	63	4.47646	1.76581	16.1451	7.92831	7.45737	1.38068	3.85828	0.835683	ENST00000267102	28	1	1	2	63	0	1.25521	19.8859	1.03247	1.01274	1.41264	1.84119	ENSPTRT00000009061	30	1	1	2	63	193.726	0	53.8008	0	0	11.777	1.69517	ENSMMUT00000017916	25	1	1	2	TRUE	TRUE
ENSMMUT00000064933_1441	ENSPTRT00000009071_32	ENST00000553127_292	chr12:49460791:+	27	0	0	0	3.53879	4.67299	0.600451	0.799038	1.42098	ENST00000553127	292	2	5	3	27	1.69044	0	0.899752	0.657144	0	0.610489	1.08601	ENSPTRT00000009071	32	1	1	3	27	0.471959	0	0	1.84969	0	0.357735	1.72496	ENSMMUT00000064933	1441	1	6	2	TRUE	TRUE
ENSMMUT00000064933_1454	ENSPTRT00000009071_45	ENST00000553127_305	chr12:49460804:+	209	0.411017	0.429269	0	1.93983	0.964563	0.527832	0.547653	0.948881	ENST00000553127	305	5	7	1	209	0.451168	0	0.188044	1.21672	0	0.36673	1.36737	ENSPTRT00000009071	45	3	3	1	209	0.278653	0.113362	0	0.813353	0	0.223077	1.40892	ENSMMUT00000064933	1454	2	7	1	TRUE	TRUE
ENSMMUT00000031628_193	ENSPTRT00000009079_257	ENST00000257894_134	chr12:49605506:-	15	0	0	0	0	0	0	0	0	ENST00000257894	134	0	1	1	15	0	0	0	0	0	0	0	ENSPTRT00000009079	257	0	5	1	15	0	0	0	0	0	0	0	ENSMMUT00000031628	193	0	3	1	TRUE	TRUE
ENSMMUT00000008756_115	ENSPTRT00000045894_448	ENST00000335999_111	chr12:49806023:-	12	2.56441	0	0	1.18027	0	0.51343	1.3268	1.43849	ENST00000335999	111	1	2	1	12	0	0	0	0	8898.43	4.17613	2.23607	ENSPTRT00000045894	448	1	2	8	12	0	0	0	0	0	0	0	ENSMMUT00000008756	115	2	2	1	TRUE	TRUE
ENSMMUT00000008756_47	ENSPTRT00000045894_379	ENST00000335999_42	chr12:49828372:-	60	0.346181	0	0	2.52489	0	2.01412	0.872376	1.40832	ENST00000335999	42	2	1	2	60	0	3.84849	0	0	1558.05	2.19129	2.22919	ENSPTRT00000045894	379	2	1	9	45	0.607484	1.86067	0	0	0	0.702564	1.63726	ENSMMUT00000008756	47	1	1	2	TRUE	TRUE
ENSMMUT00000009154_12	ENSPTRT00000102181_13	ENST00000394963_17	chr12:50084988:+	63	0	0	0	0	0	0	0	0	ENST00000394963	17	2	1	3	63	0	0	0	0	0	0	0	ENSPTRT00000102181	13	2	1	3	63	0	0	0	0	0	0	0	ENSMMUT00000009154	12	3	2	3	TRUE	TRUE
ENSMMUT00000009154_22	ENSPTRT00000102181_23	ENST00000394963_27	chr12:50084998:+	375	0.277449	0	0	1.55523	0.521196	1.15136	0.464759	1.09476	ENST00000394963	27	1	2	2	375	0	0	0.476151	0.981896	0	0.35485	1.50033	ENSPTRT00000102181	23	1	2	2	375	0.402415	0.102073	0.424292	0.486352	0.271277	0.327665	0.453818	ENSMMUT00000009154	22	1	3	2	TRUE	TRUE
ENSMMUT00000009154_182	ENSPTRT00000102181_183	ENST00000394963_187	chr12:50085158:+	24	0	0	0	0	0	0	0	0	ENST00000394963	187	3	3	1	24	0	0	0	0	0	0	0	ENSPTRT00000102181	183	3	3	1	24	0	0	0	0	0	0	0	ENSMMUT00000009154	182	4	4	1	TRUE	TRUE
ENSMMUT00000025992_773	ENSPTRT00000009133_211	ENST00000548553_782	chr12:50924839:+	42	0	0	0	1.76487	5.88608	8.95101	4.55962	1.37089	ENST00000548553	782	1	11	2	42	0	0	0	748.012	0	4.45764	2.23607	ENSPTRT00000009133	211	1	1	2	42	1.49409	1.18976	0.499292	0.255539	0	0.619879	0.918907	ENSMMUT00000025992	773	1	13	1	TRUE	TRUE
ENSMMUT00000017463_8	ENSPTRT00000009140_1930	ENST00000228515_220	chr12:51076640:-	24	0	0	0	1.18	0	0	0.257399	2.44949	ENST00000228515	220	1	1	1	24	0	0	0	1.08404	0	0.262612	2.23607	ENSPTRT00000009140	1930	1	33	1	24	0	0	0	0	0	0	0	ENSMMUT00000017463	8	0	1	1	TRUE	TRUE
ENSMMUT00000009246_27	ENSPTRT00000009153_70	ENST00000453097_15	chr12:51424845:+	27	0	0	0	0	0	0	0	0	ENST00000453097	15	3	1	3	27	0	0	0	0	0	0	0	ENSPTRT00000009153	70	0	2	3	27	0	0	0	0	0	0	0	ENSMMUT00000009246	27	0	2	2	TRUE	TRUE
ENSMMUT00000009246_46	ENSPTRT00000009153_89	ENST00000453097_34	chr12:51424864:+	124	28.2083	0	0	0	11.4083	0	17.9074	1.74568	ENST00000453097	34	2	2	2	124	0	0	0	0	0	0	0	ENSPTRT00000009153	89	0	3	2	105	0	0	0	0	0	0	0	ENSMMUT00000009246	46	0	3	1	TRUE	TRUE
ENSMMUT00000072900_464	ENSPTRT00000009171_362	ENST00000336854_358	chr12:52070439:+	15	2.7429	1.34613	0	10.6159	4.10132	2.02492	2.91763	1.08256	ENST00000336854	358	1	1	1	15	0	0.676123	0	1.18264	0	0.429007	1.45157	ENSPTRT00000009171	362	2	2	1	15	1.24507	0	0	0	0	0.200102	2.23607	ENSMMUT00000072900	464	2	2	1	TRUE	TRUE
ENSMMUT00000016304_753	ENSPTRT00000083205_428	ENST00000337581_123	chr12:54183948:-	8	1.63225	0	0	2.59686	1.96906	0.513176	1.42703	0.982714	ENST00000337581	123	3	4	1	8	6.50165	7.10502	1.96751	5.41454	0	4.39213	0.732666	ENSPTRT00000083205	428	2	9	1	8	0	0	0	0	0	0	0	ENSMMUT00000016304	753	14	14	1	TRUE	TRUE
ENSMMUT00000016304_480	ENSPTRT00000083205_158	ENST00000337581_110	chr12:54187820:-	6	2.99233	0	21.4471	5.56394	0.86155	5.12974	3.22404	1.31467	ENST00000337581	110	2	3	2	12	0	5.83558	8.24288	0.361596	6.74951	4.79365	0.897646	ENSPTRT00000083205	158	1	3	7	12	0.227823	0	0	0	0	0.0301592	2.23607	ENSMMUT00000016304	480	5	7	8	TRUE	TRUE
ENSMMUT00000016304_402	ENSPTRT00000083205_79	ENST00000337581_31	chr12:54187899:-	100	2.92524	1.26188	14.4817	3.81137	3.08292	4.02755	3.57478	0.96899	ENST00000337581	31	1	2	3	99	0	2.90257	4.8657	2.23683	3.19477	2.84188	0.668613	ENSPTRT00000083205	79	3	2	8	90	0.230072	0	0	0	0	0.0298727	2.23607	ENSMMUT00000016304	402	6	6	9	TRUE	TRUE
ENSMMUT00000059876_47	ENSPTRT00000009289_72	ENST00000449076_74	chr12:54984689:-	141	2.11162	2.08156	5.30818	5.07453	10.1805	5.55302	4.96519	0.587827	ENST00000449076	74	1	2	1	117	1.74993	3.20263	4.59957	3.22508	3.58472	3.29531	0.312535	ENSPTRT00000009289	72	1	2	7	123	0.693393	1.98701	2.53316	0.961085	1.59811	1.52118	0.481422	ENSMMUT00000059876	47	1	2	3	TRUE	TRUE
ENSMMUT00000059876_15	ENSPTRT00000009289_40	ENST00000449076_42	chr12:54984721:-	24	0.481227	0.897529	0	0	5.68491	0.233477	1.16117	1.82141	ENST00000449076	42	2	1	2	24	0	0	0	0.271221	0	0.0865897	2.23607	ENSPTRT00000009289	40	4	1	8	24	0.690347	0	0.82089	1.79386	0	0.709449	1.11775	ENSMMUT00000059876	15	2	1	4	TRUE	TRUE
ENSMMUT00000022931_853	ENSPTRT00000000116_228	ENST00000355716_228	chr1:2556593:+	63	2.01855	0.937247	1.37662	3.13947	5.88779	1.67867	2.3828	0.724703	ENST00000355716	228	1	1	1	63	3.21633	2.5433	2.98726	0.960988	4.40517	2.24263	0.442153	ENSPTRT00000000116	228	1	1	1	63	0.697778	3.14257	0.945073	1.09891	1.67445	1.24527	0.648131	ENSMMUT00000022931	853	5	6	1	TRUE	TRUE
ENSMMUT00000057523_35	ENSPTRT00000009339_49	ENST00000356464_186	chr12:56041950:+	24	2.45782	2.88358	2.11736	4.04562	0.984614	1.8523	2.05046	0.431871	ENST00000356464	186	1	1	5	24	0	0.77359	0.675241	0	0	0.334105	1.37455	ENSPTRT00000009339	49	3	1	5	24	0.364418	0	0	2.52183	0	0.50597	1.9029	ENSMMUT00000057523	35	2	1	3	TRUE	TRUE
ENSMMUT00000057523_101	ENSPTRT00000009339_115	ENST00000356464_252	chr12:56042016:+	48	0.118774	5.71454	0	0.923956	1.68741	2.30769	1.48861	1.18183	ENST00000356464	252	4	3	3	48	0	0	0	1.08344	0	0.236434	2.23607	ENSPTRT00000009339	115	4	3	3	48	3.86194	0	6.7084	0	5.92361	2.78415	0.965736	ENSMMUT00000057523	101	1	2	2	TRUE	TRUE
ENSMMUT00000057523_193	ENSPTRT00000009339_207	ENST00000356464_344	chr12:56042108:+	59	0	0	4.71111	0.506712	0.984645	3.33031	1.5494	1.23871	ENST00000356464	344	3	5	1	59	0	0	0	3.24096	0	0.459938	2.23607	ENSPTRT00000009339	207	1	5	1	59	0.0886854	0.0259996	1.42238	0	0.00985136	0.033236	2.01414	ENSMMUT00000057523	193	3	3	1	TRUE	TRUE
ENSMMUT00000071600_502	ENSPTRT00000009352_395	ENST00000345093_364	chr12:56214054:-	7	0.598595	0	0	2.12438	0	0	0.305387	1.87892	ENST00000345093	364	3	3	1	7	0	0	1.60642	0	0	0.295452	2.23607	ENSPTRT00000009352	395	3	3	1	7	0	0	0	0	0	0	0	ENSMMUT00000071600	502	6	6	1	TRUE	TRUE
ENSMMUT00000071600_283	ENSPTRT00000009352_283	ENST00000345093_252	chr12:56216524:-	66	0.364304	0.908752	0	13.3977	0	1.87387	1.03042	1.90763	ENST00000345093	252	2	2	2	66	0	0.0602591	0.764929	1.51739	2.64626	0.807529	1.11111	ENSPTRT00000009352	283	2	2	2	66	1.07039	1.91057	3.08059	1.26113	1.55126	1.82246	0.448423	ENSMMUT00000071600	283	1	2	5	TRUE	TRUE
ENSMMUT00000071600_233	ENSPTRT00000009352_233	ENST00000345093_202	chr12:56216574:-	42	1.52603	3.46036	3.82099	16.3502	16.0067	3.70397	4.44184	0.908224	ENST00000345093	202	1	1	3	42	1.28396	0.124133	3.1849	4.91808	2.69893	2.29205	0.751254	ENSPTRT00000009352	233	1	1	3	3	0	0	0	0	0	0	0	ENSMMUT00000071600	233	2	1	6	TRUE	TRUE
ENSMMUT00000012129_93	ENSPTRT00000009357_93	ENST00000267116_91	chr12:56258294:-	25	29.0779	2.3859	0	8054.77	19.6188	10.6162	9.23049	2.42716	ENST00000267116	91	1	1	1	25	1.92574	29.2996	5.29718	1.89626	0	5.16363	1.59212	ENSPTRT00000009357	93	1	1	1	25	1.81776	0	11.6073	0	11.8356	5.33111	1.2141	ENSMMUT00000012129	93	1	1	1	TRUE	TRUE
ENSMMUT00000018923_199	ENSPTRT00000095970_199	ENST00000548043_263	chr12:56333202:-	36	4.34661	0	1.50625	3.28646	1.47624	0.961993	1.95679	0.826835	ENST00000548043	263	1	2	1	36	0	0	3.74544	1.56557	0	1.03592	1.54966	ENSPTRT00000095970	199	2	3	1	36	3.1412	4.76946	1.18553	0	0.445561	1.61842	1.04835	ENSMMUT00000018923	199	2	2	1	TRUE	TRUE
ENSMMUT00000024650_686	ENSPTRT00000009405_559	ENST00000553533_250	chr12:57111184:-	24	1.46959	2.25931	3.69025	12.8016	13.5236	2.74467	3.76293	0.910417	ENST00000553533	250	2	3	1	24	2.08135	1.57998	4.33048	2.22952	2.58229	2.33579	0.411149	ENSPTRT00000009405	559	1	4	2	24	6.79813	2.36014	2.21085	0	0.131138	2.03317	1.1954	ENSMMUT00000024650	686	2	6	5	TRUE	TRUE
ENSMMUT00000024650_585	ENSPTRT00000009405_458	ENST00000553533_149	chr12:57111285:-	178	2.51248	2.14355	2.65207	9.63473	11.6925	2.52361	3.5435	0.82617	ENST00000553533	149	3	2	2	342	0.921069	1.07719	1.74729	1.55212	1.52246	1.35865	0.255507	ENSPTRT00000009405	458	3	3	3	276	3.47958	1.81875	1.56068	1.29003	0.924779	1.71623	0.544356	ENSMMUT00000024650	585	4	4	7	TRUE	TRUE
ENSMMUT00000024650_581	ENSPTRT00000009405_454	ENST00000553533_145	chr12:57111289:-	129	3.76477	2.89292	4.12268	16.5824	16.7206	3.41955	5.2156	0.856101	ENST00000553533	145	1	1	3	129	1.82601	1.77302	3.0586	2.15403	2.05655	2.13677	0.238897	ENSPTRT00000009405	454	2	2	4	39	1.36468	0	0	0	0	0.174655	2.23607	ENSMMUT00000024650	581	7	3	8	TRUE	TRUE
ENSMMUT00000007486_1392	ENSPTRT00000009479_404	ENST00000257861_404	chr12:57816068:-	28	0	0	0	0	0	0	0	0	ENST00000257861	404	0	14	1	28	0	0	0	0	0	0	0	ENSPTRT00000009479	404	0	14	1	28	0	0	0	0	0	0	0	ENSMMUT00000007486	1392	0	26	1	TRUE	TRUE
ENSMMUT00000007486_1359	ENSPTRT00000009479_369	ENST00000257861_369	chr12:57816103:-	36	0	0	0	0	0	0	0	0	ENST00000257861	369	0	13	2	36	0	0	0	0	0	0	0	ENSPTRT00000009479	369	0	13	2	61	0	0	0	0	0	0	0	ENSMMUT00000007486	1359	0	25	2	TRUE	TRUE
ENSMMUT00000007486_1350	ENSPTRT00000009479_360	ENST00000257861_360	chr12:57816112:-	45	0	0	0	0	0	0	0	0	ENST00000257861	360	0	12	3	45	0	0	0	0	0	0	0	ENSPTRT00000009479	360	0	12	3	70	0	0	0	0	0	0	0	ENSMMUT00000007486	1350	0	24	3	TRUE	TRUE
ENSMMUT00000007486_1303	ENSPTRT00000009479_313	ENST00000257861_313	chr12:57816159:-	48	0	0	0	0	0	0	0	0	ENST00000257861	313	0	11	4	48	0	0	0	0	0	0	0	ENSPTRT00000009479	313	0	11	4	48	0	0	0	0	0	0	0	ENSMMUT00000007486	1303	0	23	4	TRUE	TRUE
ENSMMUT00000007486_1280	ENSPTRT00000009479_290	ENST00000257861_290	chr12:57816182:-	142	0	0	0	0	0	0	0	0	ENST00000257861	290	0	9	6	142	0	0	0	0	0	0	0	ENSPTRT00000009479	290	0	9	6	140	0	0	0	0	0	0	0	ENSMMUT00000007486	1280	0	22	5	TRUE	TRUE
ENSMMUT00000007486_1269	ENSPTRT00000009479_279	ENST00000257861_279	chr12:57816193:-	42	0	0	0	0	0	0	0	0	ENST00000257861	279	0	8	7	42	0	0	0	0	0	0	0	ENSPTRT00000009479	279	0	8	7	42	0	0	0	0	0	0	0	ENSMMUT00000007486	1269	0	21	6	TRUE	TRUE
ENSMMUT00000007486_1226	ENSPTRT00000009479_240	ENST00000257861_240	chr12:57816232:-	81	0	0	0	0	0	0	0	0	ENST00000257861	240	0	7	8	81	0	0	0	0	0	0	0	ENSPTRT00000009479	240	0	7	8	42	0	0	0	0	0	0	0	ENSMMUT00000007486	1226	0	20	7	TRUE	TRUE
ENSMMUT00000007486_1192	ENSPTRT00000009479_206	ENST00000257861_206	chr12:57816266:-	72	0	0	0	0	0	0	0	0	ENST00000257861	206	0	6	9	72	0	0	0	0	0	0	0	ENSPTRT00000009479	206	0	6	9	159	0	0	0	0	0	0	0	ENSMMUT00000007486	1192	0	18	9	TRUE	TRUE
ENSMMUT00000007486_1141	ENSPTRT00000009479_155	ENST00000257861_155	chr12:57816317:-	123	0	0	0	0	0	0	0	0	ENST00000257861	155	0	4	11	123	0	0	0	0	0	0	0	ENSPTRT00000009479	155	0	4	11	39	0	0	0	0	0	0	0	ENSMMUT00000007486	1141	0	17	10	TRUE	TRUE
ENSMMUT00000007486_1047	ENSPTRT00000009479_61	ENST00000257861_61	chr12:57816411:-	21	0	0	0	0	0	0	0	0	ENST00000257861	61	0	2	13	21	0	0	0	0	0	0	0	ENSPTRT00000009479	61	0	2	13	21	0	0	0	0	0	0	0	ENSMMUT00000007486	1047	0	16	11	TRUE	TRUE
ENSMMUT00000010999_434	ENSPTRT00000059472_120	ENST00000374301_223	chr1:25823019:+	3	0	0	0	0	0	0	0	0	ENST00000374301	223	2	1	2	9	0	2.5753	0.653037	0.309812	2.61615	1.1474	1.02957	ENSPTRT00000059472	120	1	1	2	9	0.909912	0	0.899445	0	0.74215	0.529044	0.922113	ENSMMUT00000010999	434	3	5	2	TRUE	TRUE
ENSMMUT00000010999_444	ENSPTRT00000059472_130	ENST00000374301_233	chr1:25823029:+	76	1.12217	0.317129	0	1.9173	3.0614	0.466709	1.21184	1.01079	ENST00000374301	233	1	2	1	76	0.532124	2.11576	0.927854	0.510367	0.701285	0.912319	0.69846	ENSPTRT00000059472	130	2	2	1	76	1.10029	0.566544	1.63703	0	1.48407	1.02401	0.706168	ENSMMUT00000010999	444	2	6	1	TRUE	TRUE
ENSMMUT00000073282_778	ENSPTRT00000000740_386	ENST00000374284_121	chr1:25990821:-	5	0	7.26729	0	0	0	0	1.71655	2.44949	ENST00000374284	121	1	1	1	5	0	0	0	0	0	0	0	ENSPTRT00000000740	386	2	2	1	5	0	4.25443	0	0	0	1.98848	2.23607	ENSMMUT00000073282	778	1	16	1	TRUE	TRUE
ENSMMUT00000076689_350	ENSPTRT00000082697_269	ENST00000162749_270	chr12:6341845:-	12	2.69285	4.03745	0	4.86757	2.95014	2.90677	2.84116	0.567338	ENST00000162749	270	2	2	1	12	0	0	1.4989	0	6.0705	0.626585	1.73634	ENSPTRT00000082697	269	2	2	1	12	11.5128	0	0	0	0	1.13367	2.23607	ENSMMUT00000076689	350	2	2	1	TRUE	TRUE
ENSMMUT00000076689_239	ENSPTRT00000082697_158	ENST00000162749_160	chr12:6341955:-	132	3.36334	3.63933	4.45848	11.9459	2.52731	4.95377	4.2456	0.667573	ENST00000162749	160	1	1	2	105	27.8913	7.40197	9.09358	3.7236	0	6.26582	1.12216	ENSPTRT00000082697	158	1	1	2	105	2.45939	4.9821	0	1.84862	5.59958	3.28803	0.774934	ENSMMUT00000076689	239	1	1	2	TRUE	TRUE
ENSMMUT00000016189_58	ENSPTRT00000009504_119	ENST00000261234_124	chr12:63779926:+	18	0	16.1215	0	7.07648	0	6.3972	3.8442	1.2979	ENST00000261234	124	1	1	2	18	0	1.98594	2914.04	4.33237	14.8289	5.58711	2.21595	ENSPTRT00000009504	119	1	2	2	18	2699.17	0	0	0	12.5866	2.07044	2.22312	ENSMMUT00000016189	58	1	1	1	TRUE	TRUE
ENSMMUT00000010730_165	ENSPTRT00000057507_407	ENST00000332707_397	chr12:64404788:+	9	0	0	0	0	0	0	0	0	ENST00000332707	397	2	1	2	9	0	0	0	0	0	0	0	ENSPTRT00000057507	407	3	2	2	9	0.758306	1.03426	0	1.83455	0	0.568385	1.06313	ENSMMUT00000010730	165	1	1	2	TRUE	TRUE
ENSMMUT00000010730_182	ENSPTRT00000057507_424	ENST00000332707_414	chr12:64409962:+	66	0	0.448862	0	0.770158	2.52731	0.33666	0.368327	1.3967	ENST00000332707	414	1	2	1	66	0	0	0.892016	0	0	0.132311	2.23607	ENSPTRT00000057507	424	2	3	1	66	0.727999	0	0.311352	0.755957	0.300542	0.379344	0.763974	ENSMMUT00000010730	182	2	2	1	TRUE	TRUE
ENSMMUT00000026256_76	ENSPTRT00000008464_361	ENST00000229238_25	chr12:6493238:-	30	4.5786	4.96866	2.86555	3.4165	4.17253	4.39736	4.22422	0.192427	ENST00000229238	25	1	1	1	30	0.385612	1.1183	0.83125	2.90084	0.894538	1.25681	0.793748	ENSPTRT00000008464	361	1	2	1	18	2.76831	1.01837	1.05588	1.9485	0.920068	1.44633	0.519378	ENSMMUT00000026256	76	1	2	6	TRUE	TRUE
ENSMMUT00000031106_44	ENSPTRT00000103117_437	ENST00000531382_25	chr1:26545876:+	25	1.12223	0.923141	0	10.5953	6.15127	3.49713	2.89235	1.08774	ENST00000531382	25	1	1	1	25	2.36361	2.25824	3.37293	1.27338	5.09193	2.4846	0.503662	ENSPTRT00000103117	437	1	5	1	25	2.68149	3.20955	3.13923	1.60789	4.2195	2.9737	0.318629	ENSMMUT00000031106	44	1	1	1	TRUE	TRUE
ENSMMUT00000023369_62	ENSPTRT00000009530_74	ENST00000247815_2	chr12:66302546:+	45	0	0	0	214.063	0	7.03219	3.03688	2.35724	ENST00000247815	2	1	1	2	45	0	0	0	0	0	0	0	ENSPTRT00000009530	74	0	2	2	45	810.45	0	0	0	2207.19	2.85987	1.59515	ENSMMUT00000023369	62	1	2	1	TRUE	TRUE
ENSMMUT00000017806_90	ENSPTRT00000099523_116	ENST00000324856_104	chr1:26696118:+	114	29.3978	4.03235	17.2959	64.6118	658.221	6.24055	11.4749	1.99844	ENST00000324856	104	1	1	1	111	23.7002	13.6099	53.1134	1.20372	23.619	15.9174	0.831973	ENSPTRT00000099523	116	1	1	1	285	1.28851	6.59595	2.60583	2.13068	3.9077	3.39256	0.625966	ENSMMUT00000017806	90	1	1	1	TRUE	TRUE
ENSMMUT00000046194_70	ENSPTRT00000090197_393	ENST00000344096_391	chr12:67649111:+	23	0	0	0	0	0	0	0	0	ENST00000344096	391	4	4	1	23	0	0	0	0	0	0	0	ENSPTRT00000090197	393	4	4	1	23	0	1.59501	0	0	0	0.271939	2.23607	ENSMMUT00000046194	70	1	1	1	TRUE	TRUE
ENSMMUT00000007311_683	ENSPTRT00000100114_663	ENST00000538862_723	chr12:6851344:-	60	0	0	0	0	0	0	0	0	ENST00000538862	723	5	7	1	60	0	0	0	0	0	0	0	ENSPTRT00000100114	663	6	6	1	27	0	0	0	0	0	0	0	ENSMMUT00000007311	683	4	5	1	TRUE	TRUE
ENSMMUT00000007311_618	ENSPTRT00000100114_598	ENST00000538862_658	chr12:6851409:-	93	0	0	0	0	0	337.961	10.4231	2.44949	ENST00000538862	658	1	6	2	93	0	0	121.817	3.21676	0	2.68194	2.16488	ENSPTRT00000100114	598	1	5	2	243	0.607035	0.654507	0.581839	0.77384	0	0.50032	0.576513	ENSMMUT00000007311	618	1	4	2	TRUE	TRUE
ENSMMUT00000007311_409	ENSPTRT00000100114_395	ENST00000538862_455	chr12:6851612:-	12	0	0	0	0	0	0	0	0	ENST00000538862	455	2	4	4	12	0	0	0	0	0	0	0	ENSPTRT00000100114	395	4	3	4	12	0	0	0	0	0	0	0	ENSMMUT00000007311	409	2	3	3	TRUE	TRUE
ENSMMUT00000007311_70	ENSPTRT00000100114_37	ENST00000538862_97	chr12:6851970:-	48	0	0	0	0	0	0	0	0	ENST00000538862	97	7	3	5	48	0	0	0	0	0	0	0	ENSPTRT00000100114	37	3	2	5	48	0	0	0	0	0	0	0	ENSMMUT00000007311	70	5	2	4	TRUE	TRUE
ENSMMUT00000007311_45	ENSPTRT00000100114_12	ENST00000538862_72	chr12:6851995:-	33	0	0	0	0	0	0	0	0	ENST00000538862	72	4	2	6	33	0	0	0	0	0	0	0	ENSPTRT00000100114	12	2	1	6	33	0	0	0	0	0	0	0	ENSMMUT00000007311	45	3	1	5	TRUE	TRUE
ENSMMUT00000019907_88	ENSPTRT00000009551_348	ENST00000398004_79	chr12:68746254:+	124	8.94663	2.30499	23.0566	21.8958	26.5792	4.77822	8.73868	0.717265	ENST00000398004	79	1	1	1	124	2.79851	4.22678	16.2361	1.12408	11.7482	5.38602	0.895341	ENSPTRT00000009551	348	1	3	1	124	6.72885	6.12944	5.76354	0	0	4.73496	0.917548	ENSMMUT00000019907	88	1	1	1	TRUE	TRUE
ENSMMUT00000047456_26	ENSPTRT00000045440_49	ENST00000361720_11	chr1:26900457:-	6	0	0	0	3.53599	0	2612.45	1.82944	2.44552	ENST00000361720	11	1	1	1	6	0	0	4994.78	2.60124	0	3.2015	2.23461	ENSPTRT00000045440	49	1	1	1	6	5060.06	0	0	0	11.8648	15.6029	2.22954	ENSMMUT00000047456	26	1	1	1	TRUE	TRUE
ENSMMUT00000070770_78	ENSPTRT00000009566_76	ENST00000247843_37	chr12:69359779:+	36	5.3012	0.985043	6.85191	1.87428	6.42867	1.94914	3.16953	0.663757	ENST00000247843	37	1	1	1	36	0	0.72982	1.43091	0.114698	1.27524	0.808376	0.917508	ENSPTRT00000009566	76	2	1	2	36	0	0.0955911	0.132506	3.05578	0	0.713774	2.04386	ENSMMUT00000070770	78	1	1	1	TRUE	TRUE
ENSMMUT00000020847_123	ENSPTRT00000107270_135	ENST00000258111_61	chr12:70366350:+	138	0	0	127.557	0	0	57.7707	22.6984	1.70601	ENST00000258111	61	1	1	1	138	500.873	0	245.261	0	0	13.2527	1.49725	ENSPTRT00000107270	135	1	1	1	340	1.74398	0	0	33.4392	0	14.0682	2.10026	ENSMMUT00000020847	123	1	2	1	TRUE	TRUE
ENSMMUT00000077403_571	ENSPTRT00000105707_801	ENST00000263980_734	chr1:27154392:-	30	3.92163	0	0	0	0	1.9228	1.72337	1.67961	ENST00000263980	734	4	4	1	30	0	0	0.613747	1.80549	0	0.746422	1.62275	ENSPTRT00000105707	801	4	4	1	30	2.00088	3.87663	2.82632	0	0	2.34309	0.989528	ENSMMUT00000077403	571	1	4	1	TRUE	TRUE
ENSMMUT00000077403_511	ENSPTRT00000105707_741	ENST00000263980_674	chr1:27154452:-	15	0.449381	1.3459	0	1918.56	11.7644	5.97741	3.61978	2.4199	ENST00000263980	674	1	3	2	15	11.081	0	2.49841	5.95949	0	3.48839	1.20159	ENSPTRT00000105707	741	1	3	2	15	0.779987	2.924	3.42424	0	0	1.52704	1.14837	ENSMMUT00000077403	511	3	3	2	TRUE	TRUE
ENSMMUT00000077403_496	ENSPTRT00000105707_726	ENST00000263980_659	chr1:27154467:-	12	0	0	45.6056	0	0	1.28244	2.25482	2.37	ENST00000263980	659	3	2	3	12	0	0	0.899734	1.54843	0	0.820909	1.44721	ENSPTRT00000105707	726	3	2	3	12	1.03987	0	0	0.187225	0	0.219763	1.83951	ENSMMUT00000077403	496	4	2	3	TRUE	TRUE
ENSMMUT00000077403_490	ENSPTRT00000105707_720	ENST00000263980_653	chr1:27154473:-	18	0	0	15.2193	0	4.91194	1.09931	2.31399	1.70431	ENST00000263980	653	2	1	4	18	0	0	1.57416	1.35488	0	1.15947	1.37569	ENSPTRT00000105707	720	2	1	4	18	1.81925	0	0	3.73573	2.9676	2.01524	0.996709	ENSMMUT00000077403	490	2	1	4	TRUE	TRUE
ENSMMUT00000006018_176	ENSPTRT00000110673_150	ENST00000412720_19	chr12:7189863:+	57	0	0	3065.02	0	0	0	7.44391	2.44949	ENST00000412720	19	1	1	1	57	0	0	0	0	0	0	0	ENSPTRT00000110673	150	3	1	4	183	0	0	409.924	0	0	1.5949	2.23607	ENSMMUT00000006018	176	2	2	5	TRUE	TRUE
ENSMMUT00000013458_370	ENSPTRT00000009632_183	ENST00000266659_113	chr12:75480867:+	14	2.15456	2.62471	2.4482	1.94201	9.14024	2.56473	3.38578	0.800636	ENST00000266659	113	1	1	1	14	4.0403	0	1.8939	2.75185	2.86887	2.17595	0.649461	ENSPTRT00000009632	183	2	4	1	14	1.11987	1.32973	0	1.24781	2.08587	1.17455	0.64711	ENSMMUT00000013458	370	2	6	1	TRUE	TRUE
ENSMMUT00000047264_88	ENSPTRT00000008546_132	ENST00000075120_5	chr12:7936183:-	9	0	0	0	0	2.62409	0.46655	0.631774	2.03823	ENST00000075120	5	2	1	2	9	0	0	1.12451	4.33478	0	0.528304	1.71918	ENSPTRT00000008546	132	1	2	2	9	0.36403	2.05892	0	0	0	0.510134	1.84503	ENSMMUT00000047264	88	1	2	1	TRUE	TRUE
ENSMMUT00000021390_971	ENSPTRT00000008551_975	ENST00000162391_1020	chr12:8033735:+	24	0	0	0	1199.48	521.3	1.92302	1.52506	1.71753	ENST00000162391	1020	1	1	1	24	0	0	0	2.16687	0	0.356733	2.23607	ENSPTRT00000008551	975	2	2	1	24	0	0	0	0	0	0	0	ENSMMUT00000021390	971	2	2	1	TRUE	TRUE
ENSMMUT00000018185_130	ENSPTRT00000102843_137	ENST00000373871_56	chr1:28088555:-	39	3.36514	0.315672	1.24352	1.01186	4.23833	0.435743	1.26296	0.925207	ENST00000373871	56	1	1	1	39	1.44638	0	0.605684	1.23419	0	0.597508	1.02692	ENSPTRT00000102843	137	2	2	1	39	0.464764	0.367947	0.966074	0.137518	0.0276858	0.346466	0.929247	ENSMMUT00000018185	130	2	2	1	TRUE	TRUE
ENSMMUT00000023608_170	ENSPTRT00000009734_167	ENST00000337179_172	chr12:93378054:+	63	0	0	0	0	0	0	0	0	ENST00000337179	172	2	2	1	63	51.8684	19.083	52.4226	10.5033	25.8556	18.738	0.601812	ENSPTRT00000009734	167	1	1	1	63	40.3051	5.00233	7.02304	10.5323	18.1301	11.7161	0.887395	ENSMMUT00000023608	170	1	1	1	TRUE	TRUE
ENSMMUT00000026573_140	ENSPTRT00000102668_331	ENST00000343958_183	chr12:95217285:-	9	0	0	0	0	0	0	0	0	ENST00000343958	183	3	3	1	9	0	0	0	0	0	0	0	ENSPTRT00000102668	331	3	3	1	9	0	0	0	0	0	0	0	ENSMMUT00000026573	140	0	3	1	TRUE	TRUE
ENSMMUT00000026573_122	ENSPTRT00000102668_313	ENST00000343958_165	chr12:95217303:-	9	0	0	0	0	0	0	0	0	ENST00000343958	165	2	2	2	9	0	0	3.37066	0	0	5.45984	2.23607	ENSPTRT00000102668	313	1	2	2	9	0	0	0	0	0	0	0	ENSMMUT00000026573	122	0	2	2	TRUE	TRUE
ENSMMUT00000026573_74	ENSPTRT00000102668_265	ENST00000343958_117	chr12:95217351:-	57	548.51	23.9927	2758.62	0	0	0	24.5258	1.98328	ENST00000343958	117	1	1	3	57	0	0	3.35372	881.688	0	5.05056	2.22549	ENSPTRT00000102668	265	2	1	3	57	0	0	0	0	0	0	0	ENSMMUT00000026573	74	0	1	3	TRUE	TRUE
ENSMMUT00000025497_88	ENSPTRT00000009778_116	ENST00000228741_101	chr12:96194475:+	9	0	0	0	0	0	0	0	0	ENST00000228741	101	2	1	2	9	0	0	0	0	0	0	0	ENSPTRT00000009778	116	0	1	2	9	0	0	0	0	0	0	0	ENSMMUT00000025497	88	2	1	2	TRUE	TRUE
ENSMMUT00000025497_250	ENSPTRT00000009778_277	ENST00000228741_262	chr12:96194636:+	36	0	0	0	0	0	0.642364	0.258904	2.44949	ENST00000228741	262	1	2	1	36	0	0	0	0	0	0	0	ENSPTRT00000009778	277	0	2	1	36	0.346965	0.222035	0	0	0	0.163818	1.42325	ENSMMUT00000025497	250	1	2	1	TRUE	TRUE
ENSMMUT00000045802_547	ENSPTRT00000048551_553	ENST00000551964_558	chr12:98645698:+	30	0	2.35465	0	1598.97	0	2.98952	1.86914	2.4397	ENST00000551964	558	3	2	2	6	0	0	0	0	0	0	0	ENSPTRT00000048551	553	2	1	2	6	0	0	0	0	0	0	0	ENSMMUT00000045802	547	2	1	2	TRUE	TRUE
ENSMMUT00000045802_688	ENSPTRT00000048551_694	ENST00000551964_699	chr12:98648322:+	38	24.4337	1.46801	0	3.50642	9.74133	0.428725	2.91329	1.43092	ENST00000551964	699	2	3	1	38	0	0.842955	3.14649	1.44526	0	1.00461	1.19889	ENSPTRT00000048551	694	1	2	1	15	56.1659	0	0	0	2.75541	2.26249	2.10779	ENSMMUT00000045802	688	1	2	1	TRUE	TRUE
ENSMMUT00000054074_302	ENSPTRT00000080874_368	ENST00000376032_134	chr13:102770058:-	30	1.34642	0	0	0.759106	0	0.257254	0.288378	1.40233	ENST00000376032	134	3	3	1	30	0.103284	0	0.120778	0	0	0.0554189	1.37624	ENSPTRT00000080874	368	6	12	1	30	0.140282	0	0.922171	0	0.61429	0.414579	1.23413	ENSMMUT00000054074	302	3	5	1	TRUE	TRUE
ENSMMUT00000054074_296	ENSPTRT00000080874_362	ENST00000376032_128	chr13:102770064:-	6	0	0	0	3.89513	0	1.53893	0.610558	1.75409	ENST00000376032	128	2	2	2	6	1.82102	0	0	2.50159	0	0.610375	1.39731	ENSPTRT00000080874	362	5	11	2	6	1.02364	0	0	0	0	0.16584	2.23607	ENSMMUT00000054074	296	4	4	2	TRUE	TRUE
ENSMMUT00000054074_278	ENSPTRT00000080874_344	ENST00000376032_110	chr13:102770082:-	24	3.24038	0	2.09838	7.40002	2.27144	4.61176	2.69918	0.772613	ENST00000376032	110	1	1	3	24	4.30918	2.24677	1.42432	4.83443	0	1.93118	0.784588	ENSPTRT00000080874	344	1	10	3	24	2.10672	0.73146	0	0	0	0.547156	1.61516	ENSMMUT00000054074	278	2	3	3	TRUE	TRUE
ENSMMUT00000067866_1468	ENSPTRT00000011062_1660	ENST00000375887_11	chr13:108269728:+	51	0	868.764	0	0	0	3.83602	2.33734	2.43659	ENST00000375887	11	1	1	3	51	0	0	0	2.16483	0	0.846067	2.23607	ENSPTRT00000011062	1660	4	39	3	51	8.45443	0	0	4.36733	0.743984	2.65417	1.35797	ENSMMUT00000067866	1468	1	33	3	TRUE	TRUE
ENSMMUT00000067866_1532	ENSPTRT00000011062_1724	ENST00000375887_75	chr13:108269792:+	6	0	0	0	3196.94	0	0	0.763474	2.44949	ENST00000375887	75	3	2	2	6	0	0	6.7374	0	0	2.74217	2.23607	ENSPTRT00000011062	1724	1	40	2	6	0	0	0	0	0	0	0	ENSMMUT00000067866	1532	12	34	2	TRUE	TRUE
ENSMMUT00000067866_1574	ENSPTRT00000011062_1766	ENST00000375887_117	chr13:108269834:+	62	17.6591	0	0	0	0	0	1.21959	2.44949	ENST00000375887	117	2	3	1	62	0	0	0	3.24437	0	1.02974	2.23607	ENSPTRT00000011062	1766	3	41	1	62	0	0	0	0	0	0	0	ENSMMUT00000067866	1574	13	35	1	TRUE	TRUE
ENSMMUT00000043000_30	ENSPTRT00000104010_209	ENST00000375630_27	chr13:112690355:+	33	11.1904	6.0277	0	582.08	9.75497	1.2811	9.84607	2.31383	ENST00000375630	27	1	1	1	33	0	0	0	0	0	0	0	ENSPTRT00000104010	209	0	2	1	33	1.81177	0	37.6715	0	0	6.12424	2.11015	ENSMMUT00000043000	30	1	1	1	TRUE	TRUE
ENSMMUT00000062589_834	ENSPTRT00000079426_1083	ENST00000649841_1024	chr1:31919162:-	36	0.199606	0	0	0.0834753	0	0	0.0458689	1.73374	ENST00000649841	1024	5	13	1	36	0	0	0	0	0	0	0	ENSPTRT00000079426	1083	5	11	1	36	0.026999	0	0	0	0	0.00553533	2.23607	ENSMMUT00000062589	834	5	7	1	TRUE	TRUE
ENSMMUT00000062589_653	ENSPTRT00000079426_902	ENST00000649841_843	chr1:31919343:-	6	0	0	0	0	0	0.0261954	0.0050488	2.44949	ENST00000649841	843	6	12	2	6	0	0	0	0	0	0	0	ENSPTRT00000079426	902	11	10	2	6	0	0	0	0	0	0	0	ENSMMUT00000062589	653	7	6	2	TRUE	TRUE
ENSMMUT00000062589_626	ENSPTRT00000079426_875	ENST00000649841_816	chr1:31919370:-	6	0	0	0	0	0	0	0	0	ENST00000649841	816	13	11	3	6	0	0	0	0	0	0	0	ENSPTRT00000079426	875	10	9	3	6	0	0	0	0	0	0	0	ENSMMUT00000062589	626	6	5	3	TRUE	TRUE
ENSMMUT00000062589_548	ENSPTRT00000079426_797	ENST00000649841_738	chr1:31919448:-	30	0	0	0	0	0	0.0167201	0.00451863	2.44949	ENST00000649841	738	7	10	4	30	0	0	0	0	0	0	0	ENSPTRT00000079426	797	9	8	4	30	0.0306094	0	0	0	0	0.00602288	2.23607	ENSMMUT00000062589	548	4	4	4	TRUE	TRUE
ENSMMUT00000062589_448	ENSPTRT00000079426_695	ENST00000649841_637	chr1:31919549:-	15	0	0	0	0	0	0	0	0	ENST00000649841	637	11	9	5	15	0	0	0	0	0	0	0	ENSPTRT00000079426	695	8	7	5	15	0.0987805	0	0	0	0	0.0181649	2.23607	ENSMMUT00000062589	448	3	3	5	TRUE	TRUE
ENSMMUT00000062589_369	ENSPTRT00000079426_616	ENST00000649841_558	chr1:31919628:-	66	3.01692	2.3673	1.50669	5.29551	4.29869	3.14219	3.45052	0.413887	ENST00000649841	558	1	8	6	66	2.70245	2.00815	1.57177	1.78792	1.35999	1.76846	0.273785	ENSPTRT00000079426	616	1	6	6	66	1.67716	1.13546	0.600862	0.822908	0.8437	1.03071	0.408994	ENSMMUT00000062589	369	1	2	6	TRUE	TRUE
ENSMMUT00000026709_818	ENSPTRT00000010490_1155	ENST00000382592_421	chr13:21046051:-	25	0	0	0	0	0	0	0	0	ENST00000382592	421	8	8	1	25	0	0	0	0	0	0	0	ENSPTRT00000010490	1155	4	4	1	25	0	0	0	0	0	0	0	ENSMMUT00000026709	818	0	9	1	TRUE	TRUE
ENSMMUT00000026709_743	ENSPTRT00000010490_1079	ENST00000382592_348	chr13:21046124:-	18	0	0	0	0	0	0	0	0	ENST00000382592	348	7	7	2	18	0	0	0	0	0	0	0	ENSPTRT00000010490	1079	3	3	2	18	0	0	0	0	0	0	0	ENSMMUT00000026709	743	0	8	2	TRUE	TRUE
ENSMMUT00000026709_655	ENSPTRT00000010490_991	ENST00000382592_260	chr13:21046212:-	84	0	0	0	0	0	0	0	0	ENST00000382592	260	5	5	4	84	0	0	0	27.4204	0	7.62801	2.23607	ENSPTRT00000010490	991	1	1	4	84	0	0	0	0	0	0	0	ENSMMUT00000026709	655	0	7	3	TRUE	TRUE
ENSMMUT00000028669_63	ENSPTRT00000060269_592	ENST00000302979_505	chr13:27621926:+	36	1.27315	1.48267	2.17641	1.787	1.19383	1.40559	1.46106	0.236991	ENST00000302979	505	1	2	1	36	2.53361	0.904747	2.81924	2.14844	1.62863	1.83443	0.379079	ENSPTRT00000060269	592	1	3	1	36	1.37564	2.66483	0.523088	0.4525	2.09315	1.3737	0.680543	ENSMMUT00000028669	63	1	1	2	TRUE	TRUE
ENSMMUT00000059565_473	ENSPTRT00000067250_838	ENST00000380680_818	chr13:29849867:-	66	0.961993	0	0	2.82439	3.92626	1.97165	1.47596	0.982529	ENST00000380680	818	5	7	1	66	19.0498	0	3.90737	1.80382	0	3.22083	1.62424	ENSPTRT00000067250	838	2	7	1	66	0	0	0	0	0	0	0	ENSMMUT00000059565	473	6	6	1	TRUE	TRUE
ENSMMUT00000059565_386	ENSPTRT00000067250_751	ENST00000380680_731	chr13:29849954:-	12	0	0	0	1.18027	0	4.48575	1.28488	1.904	ENST00000380680	731	6	6	2	12	0	0	0	0	0	0	0	ENSPTRT00000067250	751	7	6	2	12	1.03987	0	8.28966	0	0	1.78927	1.9396	ENSMMUT00000059565	386	3	5	2	TRUE	TRUE
ENSMMUT00000059565_328	ENSPTRT00000067250_693	ENST00000380680_673	chr13:29850012:-	87	0.188736	4.34116	0	4.22917	5.21272	2.71327	2.65134	0.802535	ENST00000380680	673	4	5	3	87	0	0	0	1.20391	0	0.385134	2.23607	ENSPTRT00000067250	693	5	5	3	87	0.637404	0	2.36748	0	2.79866	1.25903	1.14843	ENSMMUT00000059565	328	5	3	4	TRUE	TRUE
ENSMMUT00000059565_176	ENSPTRT00000067250_532	ENST00000380680_512	chr13:29850173:-	57	10.2944	2.20063	9.3024	4.40906	15.0134	9.57962	7.34012	0.53832	ENST00000380680	512	2	4	4	57	6.88498	0	526.661	0	586.357	2.48411	1.35861	ENSPTRT00000067250	532	3	4	4	57	1.81516	20.979	7.66442	0	1.47654	6.10309	1.35674	ENSMMUT00000059565	176	2	2	5	TRUE	TRUE
ENSMMUT00000059565_36	ENSPTRT00000067250_391	ENST00000380680_371	chr13:29850314:-	45	1.74468	0	24.3868	1066.31	24.4488	6.39984	6.58071	2.30111	ENST00000380680	371	3	3	5	45	31.0385	0	1582.36	1.73346	0	4.10531	2.17974	ENSPTRT00000067250	391	1	3	5	45	1.41478	10.6156	10.6385	0	19.2487	7.39138	0.937265	ENSMMUT00000059565	36	1	1	6	TRUE	TRUE
ENSMMUT00000010632_397	ENSPTRT00000082047_1495	ENST00000255304_170	chr13:30621105:+	18	17.8689	4.03201	0	2131.63	3.93289	3.41558	5.85639	2.40976	ENST00000255304	170	1	1	2	18	1.53195	0	0.749973	1.9267	0	0.695955	1.04233	ENSPTRT00000082047	1495	2	14	2	18	0	0	0	0	0	0	0	ENSMMUT00000010632	397	2	2	2	TRUE	TRUE
ENSMMUT00000010632_423	ENSPTRT00000082047_1521	ENST00000255304_196	chr13:30621131:+	10	0	0	0	1918.56	0	0	0.509575	2.44949	ENST00000255304	196	2	2	1	10	0	0	0	0	0	0	0	ENSPTRT00000082047	1521	4	15	1	10	0	0	0	0	0	0	0	ENSMMUT00000010632	423	3	3	1	TRUE	TRUE
ENSMMUT00000021155_150	ENSPTRT00000064586_2881	ENST00000291416_140	chr1:33181904:-	348	0	0	0	111.205	252.179	1.02551	3.48731	1.70839	ENST00000291416	140	1	1	1	348	0	1.91179	0.23294	0.868879	0	1.12788	1.34988	ENSPTRT00000064586	2881	2	50	1	228	6.19189	30.1774	0	0	0	3.78037	1.79838	ENSMMUT00000021155	150	1	1	1	TRUE	TRUE
ENSMMUT00000008962_132	ENSPTRT00000043815_174	ENST00000361328_113	chr1:33479248:+	15	0	0	0	0	0	0	0	0	ENST00000361328	113	2	2	1	15	0	0	0	0	0	0	0	ENSPTRT00000043815	174	0	2	1	24	0	0	0	0	0	0	0	ENSMMUT00000008962	132	0	1	1	TRUE	TRUE
ENSMMUT00000068864_527	ENSPTRT00000108209_241	ENST00000475892_177	chr13:37051498:-	8	0	0	0	0	0	0	0	0	ENST00000475892	177	3	3	1	8	0	0	0	0	0	0	0	ENSPTRT00000108209	241	3	3	1	8	0	0	0	0	0	0	0	ENSMMUT00000068864	527	5	5	1	TRUE	TRUE
ENSMMUT00000068864_466	ENSPTRT00000108209_180	ENST00000475892_116	chr13:37051559:-	33	0	1.8169	0	2.94738	0.164826	0.413953	0.604709	1.36877	ENST00000475892	116	2	2	2	33	1.96957	0	0.421972	0	0	0.377638	1.78427	ENSPTRT00000108209	180	1	2	2	33	0.712221	0.753609	2.02209	2.98941	1.97867	1.73829	0.569838	ENSMMUT00000068864	466	1	4	2	TRUE	TRUE
ENSMMUT00000068864_455	ENSPTRT00000108209_169	ENST00000475892_105	chr13:37051570:-	80	0	1.45339	0	2.77894	0.563421	0.356751	0.651308	1.2601	ENST00000475892	105	1	1	3	80	1.18929	0	0.29819	0	0	0.24768	1.73104	ENSPTRT00000108209	169	2	1	3	80	0.466944	0.514007	1.32221	1.88802	2.03599	1.27751	0.593414	ENSMMUT00000068864	455	3	3	3	TRUE	TRUE
ENSMMUT00000002978_813	ENSPTRT00000100926_810	ENST00000352251_790	chr13:39037300:-	15	0	0	0	0	1.96769	0.116799	0.182609	2.28874	ENST00000352251	790	5	5	1	15	0	0	0	0.476025	0	0.0916742	2.23607	ENSPTRT00000100926	810	5	5	1	15	0.218517	0	0	0	0	0.0272463	2.23607	ENSMMUT00000002978	813	5	5	1	TRUE	TRUE
ENSMMUT00000002978_340	ENSPTRT00000100926_340	ENST00000352251_319	chr13:39037771:-	24	14.2974	11.0952	45.3081	66.708	28.4498	14.3549	18.6928	0.734421	ENST00000352251	319	2	4	2	24	11.6635	10.1669	22.067	2.57399	27805.5	13.1253	2.2314	ENSPTRT00000100926	340	2	4	2	24	9.99275	15.1151	0	29.956	29.1265	15.9888	0.760804	ENSMMUT00000002978	340	2	4	2	TRUE	TRUE
ENSMMUT00000002978_322	ENSPTRT00000100926_322	ENST00000352251_301	chr13:39037789:-	42	15.9697	8.87297	25.9218	97.6653	34.2412	16.6525	19.8383	0.986709	ENST00000352251	301	1	3	3	42	18.1852	9.98427	17.6603	2.84416	15889.3	13.53	2.22753	ENSPTRT00000100926	322	1	3	3	42	12.1087	16.3865	6.15564	22.4587	45.8337	18.1353	0.744052	ENSMMUT00000002978	322	1	3	3	TRUE	TRUE
ENSMMUT00000002978_173	ENSPTRT00000100926_173	ENST00000352251_152	chr13:39037938:-	153	6.15356	0.232006	34.2408	32.9302	14.8146	15.8302	9.364	0.795851	ENST00000352251	152	4	2	4	153	9.92653	1.43793	7.72188	2.10807	19.6409	5.18395	0.901715	ENSPTRT00000100926	173	4	2	4	153	7.58258	13.9677	11.0023	6.6458	6.11331	9.82584	0.368267	ENSMMUT00000002978	173	3	2	4	TRUE	TRUE
ENSMMUT00000002978_95	ENSPTRT00000100926_95	ENST00000352251_74	chr13:39038016:-	21	5.9754	8.3428	26.0683	16.4875	41.0881	8.96465	10.5682	0.76105	ENST00000352251	74	3	1	5	21	9.15464	12.5937	6.18215	3.03457	5.78293	7.44637	0.496185	ENSPTRT00000100926	95	3	1	5	21	4.24451	0	1.86284	0.140642	0.964779	1.23984	1.20227	ENSMMUT00000002978	95	4	1	5	TRUE	TRUE
ENSMMUT00000011036_2349	ENSPTRT00000087224_494	ENST00000239882_308	chr13:40982064:-	10	0	0	0	0	0.192181	0	0.0420252	2.44949	ENST00000239882	308	3	3	1	10	0	0	0	0.0563607	0	0.00879983	2.23607	ENSPTRT00000087224	494	3	7	1	10	0	0	0	0	0	0	0	ENSMMUT00000011036	2349	23	44	1	TRUE	TRUE
ENSMMUT00000011036_2332	ENSPTRT00000087224_477	ENST00000239882_291	chr13:40982081:-	12	0.336794	0.654938	0	0.590419	1.09399	0.223131	0.450664	0.79432	ENST00000239882	291	2	2	2	12	0	0	0.117214	0.559579	0	0.145161	1.79166	ENSPTRT00000087224	477	2	6	2	12	1.81961	0	1.35495	0	0	0.437512	1.39354	ENSMMUT00000011036	2332	1	43	2	TRUE	TRUE
ENSMMUT00000043372_173	ENSPTRT00000042842_192	ENST00000379406_138	chr13:41311404:+	9	0	3.02816	0	10.5929	23.5666	5.11834	4.38402	1.27588	ENST00000379406	138	1	1	1	9	13.9945	0	0	13.7191	0	4.72544	1.36942	ENSPTRT00000042842	192	1	2	1	9	0	0	9.48076	0	0	3.18066	2.23607	ENSMMUT00000043372	173	1	1	1	TRUE	TRUE
ENSMMUT00000060776_689	ENSPTRT00000010763_434	ENST00000429979_575	chr13:46372506:-	31	2.01977	0	0	20.0328	1.47662	1.09924	3.01116	1.9111	ENST00000429979	575	2	5	1	31	0	0.410107	0.281323	1.30063	0	0.396489	1.34307	ENSPTRT00000010763	434	2	7	1	31	0	3.10092	5.44775	0	0	1.52595	1.45276	ENSMMUT00000060776	689	3	16	1	TRUE	TRUE
ENSMMUT00000060776_622	ENSPTRT00000010763_370	ENST00000429979_511	chr13:46372570:-	9	2.2444	9.02603	0	7.07917	3.19959	7.67605	4.86373	0.73122	ENST00000429979	511	1	4	2	9	2.54675	0	4.404	1.44527	0	1.77775	1.10898	ENSPTRT00000010763	370	1	6	2	9	0	3.45626	0	0	0	1.14067	2.23607	ENSMMUT00000060776	622	4	15	2	TRUE	TRUE
ENSMMUT00000069468_1369	ENSPTRT00000104484_290	ENST00000430805_290	chr13:48524697:-	30	0	1.83492	0	1.17987	9.83217	1.83115	2.12003	1.51715	ENST00000430805	290	1	1	1	30	0	0	2.2455	1.44499	0	1.37209	1.42198	ENSPTRT00000104484	290	1	1	1	30	3.61608	0	0	0	0	0.10417	2.23607	ENSMMUT00000069468	1369	1	14	1	TRUE	TRUE
ENSMMUT00000018907_505	ENSPTRT00000010791_408	ENST00000610540_437	chr13:49401184:-	24	0	0	0	0	0	0	0	0	ENST00000610540	437	4	5	1	24	0	0	1.40505	1.68579	0	0.563823	1.37869	ENSPTRT00000010791	408	2	3	1	24	0	1.23468	0	0	0	0.352996	2.23607	ENSMMUT00000018907	505	2	4	1	TRUE	TRUE
ENSMMUT00000018907_436	ENSPTRT00000010791_339	ENST00000610540_368	chr13:49401253:-	27	0	0	0	0	2313.44	0	10.0095	2.44949	ENST00000610540	368	1	4	2	27	94.1098	0	8.96469	5.53639	0	8.49738	1.87118	ENSPTRT00000010791	339	1	2	2	27	5.42361	19.88	0	0	0	2.04957	1.70147	ENSMMUT00000018907	436	1	3	2	TRUE	TRUE
ENSMMUT00000068627_110	ENSPTRT00000010797_160	ENST00000378302_198	chr13:49567318:-	18	0.748611	2.24279	0	2131.63	19.5867	1.2822	2.79533	2.41704	ENST00000378302	198	1	1	1	18	0	1.15893	5.59826	0	0	0.813894	1.7955	ENSPTRT00000010797	160	1	1	1	18	0.607308	0	0	0	0	0.0505179	2.23607	ENSMMUT00000068627	110	1	1	1	TRUE	TRUE
ENSMMUT00000043276_665	ENSPTRT00000060193_221	ENST00000242827_28	chr13:49691459:-	35	16.8181	2.17351	8.02908	26.3979	8.47644	12.9996	11.2593	0.674907	ENST00000242827	28	1	1	1	35	12.2399	1.68503	21.9985	1.91252	0	6.21865	1.24307	ENSPTRT00000060193	221	1	2	1	35	8.47934	13.9331	0	11.1933	6.14177	7.13999	0.668808	ENSMMUT00000043276	665	1	3	1	TRUE	TRUE
ENSMMUT00000013152_1280	ENSPTRT00000010822_73	ENST00000298125_91	chr13:51584552:+	136	1.6197	7.37782	4.29704	9.24494	3.08173	3.58367	4.34592	0.589556	ENST00000298125	91	1	1	1	136	4.64986	0	3.92424	2.69046	8.53087	3.22662	0.785281	ENSPTRT00000010822	73	1	1	1	218	1.75059	5.3016	5.16195	1.4	1.62879	2.76352	0.655239	ENSMMUT00000013152	1280	3	12	8	TRUE	TRUE
ENSMMUT00000023219_1711	ENSPTRT00000060176_1694	ENST00000618534_386	chr13:52156201:-	10	0	0	0	0	0	0	0	0	ENST00000618534	386	0	2	1	10	0	0	0	0	0	0	0	ENSPTRT00000060176	1694	0	35	1	10	0	0	0	0	0	0	0	ENSMMUT00000023219	1711	0	36	1	TRUE	TRUE
ENSMMUT00000023219_1677	ENSPTRT00000060176_1660	ENST00000618534_352	chr13:52156235:-	15	0	0	0	0	0	0	0	0	ENST00000618534	352	0	1	2	15	0	0	0	0	0	0	0	ENSPTRT00000060176	1660	0	34	2	15	0	0	0	0	0	0	0	ENSMMUT00000023219	1677	0	35	2	TRUE	TRUE
ENSMMUT00000071036_327	ENSPTRT00000001036_382	ENST00000373191_319	chr1:35931423:+	4	0	0	0	0	0	0	0	0	ENST00000373191	319	2	2	1	4	0	0	0	0	0	0	0	ENSPTRT00000001036	382	0	2	1	4	0	0	0	0	0	0	0	ENSMMUT00000071036	327	2	2	1	TRUE	TRUE
ENSMMUT00000030204_284	ENSPTRT00000047025_258	ENST00000355619_253	chr13:77026907:-	6	47.0556	24.215	30.4484	83.1367	31219	41.0242	45.5101	2.42838	ENST00000355619	253	2	2	1	6	51.5154	470.344	88640.5	58.5032	115.248	104.891	2.21433	ENSPTRT00000047025	258	1	2	1	6	21249	179.24	29.2329	98078.5	35.5633	109.316	1.77551	ENSMMUT00000030204	284	1	2	1	TRUE	TRUE
ENSMMUT00000030204_227	ENSPTRT00000047025_195	ENST00000355619_190	chr13:77026970:-	69	55.751	29.4972	42.1754	65.1112	72.0876	39.6158	46.8717	0.322336	ENST00000355619	190	1	1	2	69	37.7325	481.495	196.14	76.7326	113.108	87.387	0.982412	ENSPTRT00000047025	195	2	1	2	63	3373.71	120.69	42.4892	71.2833	53.7039	77.9435	2.01653	ENSMMUT00000030204	227	2	1	2	TRUE	TRUE
ENSMMUT00000018999_219	ENSPTRT00000010991_17	ENST00000261574_171	chr13:97969771:+	10	0	0	0	0	0	0	0	0	ENST00000261574	171	0	2	1	10	0	0	0	0	0	0	0	ENSPTRT00000010991	17	0	1	1	10	0	0	0	0	0	0	0	ENSMMUT00000018999	219	0	3	2	TRUE	TRUE
ENSMMUT00000012827_210	ENSPTRT00000060112_211	ENST00000376547_89	chr13:98521910:-	58	0	0	0	0	0	0	0	0	ENST00000376547	89	0	3	1	58	0	0	0	0	0	0	0	ENSPTRT00000060112	211	0	4	1	59	0	0	0	0	0	0	0	ENSMMUT00000012827	210	0	5	1	TRUE	TRUE
ENSMMUT00000012827_175	ENSPTRT00000060112_174	ENST00000376547_52	chr13:98521947:-	95	0	0	0	0	0	0	0	0	ENST00000376547	52	0	2	2	95	0	0	0	0	0	0	0	ENSPTRT00000060112	174	0	3	2	94	0	0	0	0	0	0	0	ENSMMUT00000012827	175	0	4	2	TRUE	TRUE
ENSMMUT00000012827_158	ENSPTRT00000060112_157	ENST00000376547_35	chr13:98521964:-	54	0	0	0	0	0	0	0	0	ENST00000376547	35	0	1	3	54	0	0	0	0	0	0	0	ENSPTRT00000060112	157	0	2	3	84	0	0	0	0	0	0	0	ENSMMUT00000012827	158	0	3	3	TRUE	TRUE
ENSMMUT00000027471_105	ENSPTRT00000011015_26	ENST00000642475_1083	chr13:99501399:+	75	0	0	0	7.0001	0	0.855475	0.476604	2.14537	ENST00000642475	1083	4	13	2	75	0	0	0.84376	0.867531	0	0.519326	1.36953	ENSPTRT00000011015	26	2	1	2	75	1.81797	0	0	0	0.710132	0.418508	1.57324	ENSMMUT00000027471	105	3	1	3	TRUE	TRUE
ENSMMUT00000027471_125	ENSPTRT00000011015_46	ENST00000642475_1103	chr13:99501419:+	188	3.49486	5.06387	13.0353	11.9653	14.1804	4.02577	5.44708	0.571656	ENST00000642475	1103	1	14	1	188	1.67426	3.29002	2.76638	2.92172	3.53747	2.76051	0.25287	ENSPTRT00000011015	46	1	2	1	188	3.18082	0.60503	2.63283	1.48724	1.25307	1.76954	0.573863	ENSMMUT00000027471	125	1	3	1	TRUE	TRUE
ENSMMUT00000047362_215	ENSPTRT00000001132_412	ENST00000372706_342	chr1:40477631:+	132	0	0.809566	9.06156	3.48112	23.1691	1.70007	5.43474	1.38837	ENST00000372706	342	2	1	7	132	0	0	13.0191	3.39167	0	1.99504	1.7177	ENSPTRT00000001132	412	2	1	7	132	0	0	0	0.566781	0	0.118112	2.23607	ENSMMUT00000047362	215	3	1	6	TRUE	TRUE
ENSMMUT00000047362_311	ENSPTRT00000001132_508	ENST00000372706_438	chr1:40477727:+	36	0	0	0	0	0	0	0	0	ENST00000372706	438	6	3	5	36	0	0	0	7.54817	0	1.59767	2.23607	ENSPTRT00000001132	508	3	3	5	36	0	0	0	0	0	0	0	ENSMMUT00000047362	311	4	2	5	TRUE	TRUE
ENSMMUT00000047362_330	ENSPTRT00000001132_527	ENST00000372706_457	chr1:40477746:+	63	0	0	0	0	0	2.54926	0.26951	2.44949	ENST00000372706	457	5	4	4	63	0	0	0	3.77932	0	0.802341	2.23607	ENSPTRT00000001132	527	4	4	4	63	3.61492	0	0	0	2.6657	1.4885	1.39513	ENSMMUT00000047362	330	1	3	4	TRUE	TRUE
ENSMMUT00000047362_472	ENSPTRT00000001132_671	ENST00000372706_601	chr1:40477890:+	6	0	0	0	0	0	0	0	0	ENST00000372706	601	7	5	3	6	0	0	0	0	0	0	0	ENSPTRT00000001132	671	5	5	3	141	2.21848	0	0	0	0	0.226865	2.23607	ENSMMUT00000047362	472	2	4	3	TRUE	TRUE
ENSMMUT00000047362_565	ENSPTRT00000001132_751	ENST00000372706_681	chr1:40479111:+	48	0	0	0	0	0	2.54102	0.311978	2.44949	ENST00000372706	681	4	7	1	48	0	0	0	0	0	0	0	ENSPTRT00000001132	751	7	7	1	48	0	0	0	0	0	0	0	ENSMMUT00000047362	565	6	6	1	TRUE	TRUE
ENSMMUT00000055571_233	ENSPTRT00000001135_458	ENST00000372684_432	chr1:40647700:-	64	0	0	0	0	0	0.234662	0.121809	2.44949	ENST00000372684	432	3	3	1	64	0	0	0	0	0	0	0	ENSPTRT00000001135	458	3	3	1	64	0	0	0	0	3.70246	0.448517	2.23607	ENSMMUT00000055571	233	1	2	1	TRUE	TRUE
ENSMMUT00000055571_190	ENSPTRT00000001135_419	ENST00000372684_393	chr1:40647739:-	9	0	0	0	0	0	0.855222	1.01738	2.44949	ENST00000372684	393	2	2	2	9	0	0	0	0	0	0	0	ENSPTRT00000001135	419	2	2	2	9	0	0	0	0	0	0	0	ENSMMUT00000055571	190	2	1	2	TRUE	TRUE
ENSMMUT00000059634_677	ENSPTRT00000059332_651	ENST00000359520_194	chr14:102376667:+	55	0	0	0	0	0	0.642918	0.209407	2.44949	ENST00000359520	194	1	1	1	55	0	0	2.23901	0	0	0.295515	2.23607	ENSPTRT00000059332	651	3	9	1	55	5.38708	0	0	0	0	0.283135	2.23607	ENSMMUT00000059634	677	1	14	1	TRUE	TRUE
ENSMMUT00000066386_392	ENSPTRT00000012445_554	ENST00000558506_791	chr14:103335739:+	122	1.04209	1.77685	0.322215	5.48161	4.87076	1.32635	2.06471	0.873482	ENST00000558506	791	3	17	2	122	1.58011	0.794283	1.34707	1.45576	1.9578	1.3354	0.295807	ENSPTRT00000012445	554	2	5	2	122	1.57114	0.864587	1.24274	1.7403	0.80576	1.17812	0.333466	ENSMMUT00000066386	392	1	4	2	TRUE	TRUE
ENSMMUT00000066386_424	ENSPTRT00000012445_586	ENST00000558506_823	chr14:103335771:+	69	0.572219	1.79997	0.440721	5.49571	3.73717	1.01006	1.65644	0.931495	ENST00000558506	823	4	18	1	69	1.50664	0.318622	0.986915	1.40176	1.46602	1.05816	0.441737	ENSPTRT00000012445	586	4	6	1	69	1.47776	0.773143	1.10093	2.0512	0.668508	1.09708	0.464971	ENSMMUT00000066386	424	2	5	1	TRUE	TRUE
ENSMMUT00000023901_99	ENSPTRT00000012460_202	ENST00000337322_90	chr14:103562209:-	39	0	0	9.73042	0	0	0	1.81845	2.44949	ENST00000337322	90	1	1	1	39	0	0	0	0	0	0	0	ENSPTRT00000012460	202	0	1	1	39	0	0	0	0	0	0	0	ENSMMUT00000023901	99	0	1	4	TRUE	TRUE
ENSMMUT00000001808_251	ENSPTRT00000012513_524	ENST00000547315_593	chr14:104986380:+	52	451.116	1064.85	0	0	721.415	0	38.7339	1.21333	ENST00000547315	593	1	1	1	52	58.4735	7.17443	0	1449.05	0	12.9511	2.11647	ENSPTRT00000012513	524	1	1	1	52	3.5991	0	0	0	0	0.750403	2.23607	ENSMMUT00000001808	251	1	1	1	TRUE	TRUE
ENSMMUT00000019410_145	ENSPTRT00000086758_137	ENST00000392554_139	chr14:105248712:+	162	0	0	0	3.3981	0	1.02596	0.254239	1.85338	ENST00000392554	139	1	1	1	162	0	2.20277	0	2.37737	0	0.995819	1.37096	ENSPTRT00000086758	137	1	1	1	48	0	0	0	0	0	0	0	ENSMMUT00000019410	145	2	1	3	TRUE	TRUE
ENSMMUT00000022785_958	ENSPTRT00000086632_883	ENST00000372583_1258	chr1:41584850:-	30	0	0	0	959.782	0	0	0.483628	2.44949	ENST00000372583	1258	19	26	1	30	0	0	0	0	0	0	0	ENSPTRT00000086632	883	13	13	1	30	1.8125	0	0	0	0	0.0268835	2.23607	ENSMMUT00000022785	958	7	16	1	TRUE	TRUE
ENSMMUT00000022785_910	ENSPTRT00000086632_835	ENST00000372583_1210	chr1:41584898:-	48	0	0	0	400.492	2.45601	0.286273	0.976874	2.42954	ENST00000372583	1210	17	25	2	48	0	0.993417	0.225668	0	0	0.379672	1.76477	ENSPTRT00000086632	835	7	12	2	48	5.39616	0	0	0	0	0.0698063	2.23607	ENSMMUT00000022785	910	6	15	2	TRUE	TRUE
ENSMMUT00000022785_821	ENSPTRT00000086632_746	ENST00000372583_1121	chr1:41584987:-	33	0	0	0	3.511	0	1.09924	0.814817	1.83989	ENST00000372583	1121	18	24	3	33	0	0	1.57333	0	0	0.356998	2.23607	ENSPTRT00000086632	746	8	11	3	33	0	0	0	3.63937	0	0.554676	2.23607	ENSMMUT00000022785	821	5	14	3	TRUE	TRUE
ENSMMUT00000022785_790	ENSPTRT00000086632_715	ENST00000372583_1090	chr1:41585018:-	15	0	0	0	640.188	2082.2	0	1.14439	1.84663	ENST00000372583	1090	16	23	4	15	0	0	6.17377	15.1047	0	2.35173	1.5574	ENSPTRT00000086632	715	2	10	4	15	0	0	0	0	0	0	0	ENSMMUT00000022785	790	16	13	4	TRUE	TRUE
ENSMMUT00000022785_721	ENSPTRT00000086632_646	ENST00000372583_1021	chr1:41585087:-	63	0	0	0	305.375	0	1.36762	1.21985	2.43641	ENST00000372583	1021	15	22	5	63	0	0	1.87162	3.77932	0	0.692416	1.4937	ENSPTRT00000086632	646	6	9	5	63	193.726	0.633513	0	0	2.83061	1.00466	2.18716	ENSMMUT00000022785	721	2	12	5	TRUE	TRUE
ENSMMUT00000022785_700	ENSPTRT00000086632_625	ENST00000372583_1000	chr1:41585108:-	84	0	0	0	457.563	0	1.28219	1.36618	2.44129	ENST00000372583	1000	14	21	6	84	0	0	1.87071	8.61774	0	0.933624	1.77993	ENSPTRT00000086632	625	5	8	6	84	145.545	0.53232	0	0	2.59428	0.849079	2.17758	ENSMMUT00000022785	700	4	11	6	TRUE	TRUE
ENSMMUT00000022785_620	ENSPTRT00000086632_545	ENST00000372583_920	chr1:41585188:-	93	12.1952	0	0	1547.42	13.4202	3.06571	8.40299	2.39611	ENST00000372583	920	3	20	7	93	0	0.605235	6.70788	2.43353	431.521	1.72111	2.17453	ENSPTRT00000086632	545	4	7	7	93	0	0	0	0	0	0	0	ENSMMUT00000022785	620	15	10	7	TRUE	TRUE
ENSMMUT00000022785_610	ENSPTRT00000086632_535	ENST00000372583_910	chr1:41585198:-	39	24.427	0	0	3442.78	23.3556	12.6771	21.1008	2.39883	ENST00000372583	910	1	19	8	39	0	1.39025	13.4227	0	0	2.74138	1.98417	ENSPTRT00000086632	535	1	6	8	39	0	0	0	0	0	0	0	ENSMMUT00000022785	610	14	9	8	TRUE	TRUE
ENSMMUT00000022785_599	ENSPTRT00000086632_524	ENST00000372583_899	chr1:41585209:-	114	12.1619	2.41145	0	54.4163	36.1513	4.01501	10.6415	1.21726	ENST00000372583	899	2	18	9	114	0	1.87973	5.22414	2.43223	352.214	2.23737	2.16254	ENSPTRT00000086632	524	3	5	9	114	0	1.44004	0	0	1.48314	0.918222	1.36955	ENSMMUT00000022785	599	3	8	9	TRUE	TRUE
ENSMMUT00000022831_663	ENSPTRT00000044936_800	ENST00000437553_450	chr14:20325541:-	87	0	0	0	0	0	0	0	0	ENST00000437553	450	8	8	3	40	0.253852	0	0	0	0	0.0338373	2.23607	ENSPTRT00000044936	800	5	11	1	231	0	0	0	0	0	0	0	ENSMMUT00000022831	663	9	9	2	TRUE	TRUE
ENSMMUT00000022831_641	ENSPTRT00000044936_778	ENST00000437553_428	chr14:20325563:-	117	0	0	0	0.0534704	0	0	0.00707376	2.44949	ENST00000437553	428	6	7	4	62	0.184415	0	0.0950506	0	0	0.046813	1.4814	ENSPTRT00000044936	778	4	10	2	114	0	0	0	0	0	0	0	ENSMMUT00000022831	641	8	8	3	TRUE	TRUE
ENSMMUT00000022831_542	ENSPTRT00000044936_679	ENST00000437553_329	chr14:20326724:-	15	0.208833	0	0	0	0	0.0996639	0.0541482	1.68844	ENST00000437553	329	4	6	5	15	0	0	0	0.1895	0	0.0323585	2.23607	ENSPTRT00000044936	679	6	9	3	15	0	0	0	0	0	0	0	ENSMMUT00000022831	542	7	7	4	TRUE	TRUE
ENSMMUT00000022831_537	ENSPTRT00000044936_674	ENST00000437553_324	chr14:20326729:-	6	0.544153	0	0	0.0932531	0.173135	0.342061	0.223617	1.11736	ENST00000437553	324	3	5	6	6	0	0	0	0.510208	0	0.0623709	2.23607	ENSPTRT00000044936	674	3	8	4	6	0	0	0	0	0	0	0	ENSMMUT00000022831	537	6	6	5	TRUE	TRUE
ENSMMUT00000022831_475	ENSPTRT00000044936_612	ENST00000437553_262	chr14:20326791:-	18	0	0	0	0	0.0804828	0	0.0227436	2.44949	ENST00000437553	262	5	4	7	18	0	0	0	0	0	0	0	ENSPTRT00000044936	612	11	7	5	18	0	0	0	0	0	0	0	ENSMMUT00000022831	475	5	5	6	TRUE	TRUE
ENSMMUT00000022831_407	ENSPTRT00000044936_543	ENST00000437553_193	chr14:20329240:-	51	0	0	0	0	0	0	0	0	ENST00000437553	193	7	3	8	51	0	0	0	0	0	0	0	ENSPTRT00000044936	543	10	6	6	72	0.342101	0	0	0	0	0.0507815	2.23607	ENSMMUT00000022831	407	3	4	7	TRUE	TRUE
ENSMMUT00000022831_283	ENSPTRT00000044936_417	ENST00000437553_67	chr14:20329366:-	120	1.35141	1.92298	1.48378	2.60343	1.56205	2.29238	1.85552	0.265546	ENST00000437553	67	1	1	10	120	1.01879	0.945927	1.25529	2.58539	2.10395	1.38376	0.458892	ENSPTRT00000044936	417	1	4	8	135	0.646199	2.12565	2.05083	0	0	0.863834	1.09846	ENSMMUT00000022831	283	2	2	9	TRUE	TRUE
ENSMMUT00000022837_55	ENSPTRT00000011175_89	ENST00000250416_6	chr14:20343620:+	22	0	0	0	0.708795	1.21171	0	0.610878	1.62692	ENST00000250416	6	1	1	1	22	0	0	0	0.271724	0	0.0373187	2.23607	ENSPTRT00000011175	89	1	1	1	22	0.242973	0.604546	0	0	0	0.175751	1.56326	ENSMMUT00000022837	55	1	1	1	TRUE	TRUE
ENSMMUT00000040064_237	ENSPTRT00000011233_341	ENST00000643469_245	chr14:21431794:-	36	1734.78	0	0	799.985	0	2.04972	2.53744	1.69795	ENST00000643469	245	4	6	1	36	0	0	0	5.0425	0	0.428362	2.23607	ENSPTRT00000011233	341	4	5	1	36	1.21244	0	0	0	0	0.0673385	2.23607	ENSMMUT00000040064	237	5	5	1	TRUE	TRUE
ENSMMUT00000040064_215	ENSPTRT00000011233_319	ENST00000643469_223	chr14:21431816:-	15	0	0	0	0	5828.36	0	3.28189	2.44949	ENST00000643469	223	3	5	2	15	0	0	0	0	0	0	0	ENSPTRT00000011233	319	5	4	2	15	0	5.31346	0	0	0	0.639605	2.23607	ENSMMUT00000040064	215	3	4	2	TRUE	TRUE
ENSMMUT00000040064_165	ENSPTRT00000011233_269	ENST00000643469_173	chr14:21436908:-	22	9.41638	3.81303	13.034	3923.29	7.82949	1.13999	5.19233	2.42334	ENST00000643469	173	2	4	3	30	0	0	0.675358	2.95487	0	0.568605	1.76271	ENSPTRT00000011233	269	3	3	3	30	1.81934	0.906697	3.25859	0	2.11992	1.62884	0.76235	ENSMMUT00000040064	165	2	3	3	TRUE	TRUE
ENSMMUT00000040064_135	ENSPTRT00000011233_239	ENST00000643469_143	chr14:21436938:-	22	9.41638	3.81303	13.034	3923.29	7.82949	1.13999	5.19233	2.42334	ENST00000643469	143	1	3	4	60	0	1.83397	3.92739	2.95303	0	1.48025	1.00696	ENSPTRT00000011233	239	2	2	4	60	1.712	1.61438	4.41501	0	1.53513	1.87951	0.859665	ENSMMUT00000040064	135	1	2	4	TRUE	TRUE
ENSMMUT00000078020_384	ENSPTRT00000011257_503	ENST00000397532_489	chr14:22813436:-	18	0	0	0	0.141892	0	0.366996	0.0730823	1.76193	ENST00000397532	489	3	4	1	18	0	0	0	0	0	0	0	ENSPTRT00000011257	503	0	5	1	18	0	0	0	0	0	0	0	ENSMMUT00000078020	384	0	4	1	TRUE	TRUE
ENSMMUT00000008401_332	ENSPTRT00000109096_147	ENST00000361611_152	chr14:23034994:-	36	0	0	0	0	0	0	0	0	ENST00000361611	152	4	4	1	36	0	0	7.79886	0	0	6.25243	2.23607	ENSPTRT00000109096	147	1	4	1	36	0	0	0	0	0	0	0	ENSMMUT00000008401	332	7	7	1	TRUE	TRUE
ENSMMUT00000008401_278	ENSPTRT00000109096_93	ENST00000361611_98	chr14:23035048:-	90	0	0	0	320.594	0	0	7.89262	2.44949	ENST00000361611	98	1	3	2	90	0	0	3.7242	0	0	4.44938	2.23607	ENSPTRT00000109096	93	2	3	2	90	0	0	0	0	0	0	0	ENSMMUT00000008401	278	6	6	2	TRUE	TRUE
ENSMMUT00000008401_220	ENSPTRT00000109096_23	ENST00000361611_28	chr14:23035118:-	21	0	0	0	1370.69	0	0	1.82441	2.44949	ENST00000361611	28	2	2	3	21	0	4.11704	0	0	0	4.16942	2.23607	ENSPTRT00000109096	23	3	2	3	132	0	0	0	0	0	0	0	ENSMMUT00000008401	220	4	5	3	TRUE	TRUE
ENSMMUT00000008401_205	ENSPTRT00000109096_8	ENST00000361611_13	chr14:23035133:-	36	0	0	0	799.985	0	0	1.81944	2.44949	ENST00000361611	13	3	1	4	36	0	4.11435	0	0	0	4.15831	2.23607	ENSPTRT00000109096	8	4	1	4	147	0	10.4567	0	0	0	10.9209	2.23607	ENSMMUT00000008401	205	1	4	4	TRUE	TRUE
ENSMMUT00000039999_34	ENSPTRT00000109302_742	ENST00000446197_36	chr14:24114815:+	24	3.36476	1.55296	10.8528	28.0927	15.2345	9.88453	7.45277	0.831927	ENST00000446197	36	1	1	4	24	0	0	10.3858	1.62554	6.36044	2.83194	1.24315	ENSPTRT00000109302	742	1	3	2	24	0	12.8298	0	0	4.20176	2.21231	1.63615	ENSMMUT00000039999	34	2	1	3	TRUE	TRUE
ENSMMUT00000039999_562	ENSPTRT00000109302_888	ENST00000446197_712	chr14:24115579:+	9	4.33885	1.53184	0	4.42558	1.79	2.81332	2.49481	0.694628	ENST00000446197	712	3	4	1	9	1.27346	0	0.342354	3.71661	0	0.805657	1.47254	ENSPTRT00000109302	888	2	4	1	9	4.91242	3.77901	3.4144	1.35632	6.28979	3.75729	0.464084	ENSMMUT00000039999	562	1	3	1	TRUE	TRUE
ENSMMUT00000054947_78	ENSPTRT00000011369_95	ENST00000419198_39	chr14:24141547:-	114	1.45857	1.06676	0	1.11294	1.14827	3.55753	1.36166	0.843168	ENST00000419198	39	1	1	1	122	6.99419	3.64246	1.36069	0	4.63893	2.82494	0.825883	ENSPTRT00000011369	95	1	1	1	114	0.0965916	1.7544	1.61183	2.61999	1.66889	1.52187	0.587376	ENSMMUT00000054947	78	1	1	1	TRUE	TRUE
ENSMMUT00000073522_348	ENSPTRT00000093398_374	ENST00000620473_44	chr14:24171896:+	135	0	0	14.5205	0	0	0.643281	1.0824	2.32702	ENST00000620473	44	3	1	3	135	13.8542	0	0	0	0	2.07544	2.23607	ENSPTRT00000093398	374	1	2	3	432	0	0	13.3732	0	0	0.454779	2.23607	ENSMMUT00000073522	348	1	3	3	TRUE	TRUE
ENSMMUT00000073522_376	ENSPTRT00000093398_402	ENST00000620473_72	chr14:24171924:+	171	0.251438	0	11.6171	3.96093	0	1.57613	1.35468	1.5623	ENST00000620473	72	2	2	2	171	4.01824	1.1327	0	0.725455	0	1.01402	1.41414	ENSPTRT00000093398	402	2	3	2	168	0	0	0	0	0	0	0	ENSMMUT00000073522	376	4	4	2	TRUE	TRUE
ENSMMUT00000073522_490	ENSPTRT00000093398_508	ENST00000620473_178	chr14:24172030:+	54	0.3214	0	29.0986	4.5434	0	3.07097	2.03205	1.84482	ENST00000620473	178	1	3	1	54	1.6335	1.30712	0	1.44275	0	0.732871	0.922401	ENSPTRT00000093398	508	3	4	1	54	0	0	0	0	0	0	0	ENSMMUT00000073522	490	5	5	1	TRUE	TRUE
ENSMMUT00000039970_603	ENSPTRT00000011394_80	ENST00000267415_136	chr14:24242488:-	84	2.71042	7.39766	7.08358	5.88583	18.0136	6.06642	6.92617	0.667325	ENST00000267415	136	1	1	1	84	3.27396	4.02741	5.12962	4.1327	13.0365	5.19685	0.681177	ENSPTRT00000011394	80	1	1	1	84	5.61429	7.87993	0.515881	1.27792	2.1191	2.85567	0.901511	ENSMMUT00000039970	603	1	1	1	TRUE	TRUE
ENSMMUT00000063754_117	ENSPTRT00000104185_2690	ENST00000372502_145	chr1:42849350:+	21	0	0	0	0	0.787968	0.855412	0.287121	1.55115	ENST00000372502	145	1	2	2	21	0	0	0.225901	6.46511	0	0.524316	2.14295	ENSPTRT00000104185	2690	4	40	2	21	0.202386	0	0	0	0	0.057729	2.23607	ENSMMUT00000063754	117	3	2	2	TRUE	TRUE
ENSMMUT00000016128_163	ENSPTRT00000044991_165	ENST00000357479_20	chr14:31026360:-	30	0	0	0	320.594	833.48	2.56013	1.87432	1.7584	ENST00000357479	20	2	2	1	30	0	13.7753	0	0	0	1.49585	2.23607	ENSPTRT00000044991	165	3	3	1	30	0	7.51836	0	9.06649	0	4.36655	1.37921	ENSMMUT00000016128	163	1	3	1	TRUE	TRUE
ENSMMUT00000016128_146	ENSPTRT00000044991_148	ENST00000357479_3	chr14:31026377:-	18	3035.12	0	0	0	0	0	3.54562	2.44949	ENST00000357479	3	1	1	2	18	0	0	0	5.05086	0	2.13055	2.23607	ENSPTRT00000044991	148	2	2	2	18	0	0	0	0	0	0	0	ENSMMUT00000016128	146	3	2	2	TRUE	TRUE
ENSMMUT00000022954_315	ENSPTRT00000059541_310	ENST00000345122_63	chr14:32077366:+	8	0	2.69161	0	1199.48	0	0.855207	1.66399	2.44083	ENST00000345122	63	4	1	10	8	0	0	0	0	0	0	0	ENSPTRT00000059541	310	8	1	10	8	0	0	0	0	0	0	0	ENSMMUT00000022954	315	8	1	9	TRUE	TRUE
ENSMMUT00000022954_389	ENSPTRT00000059541_384	ENST00000345122_137	chr14:32090506:+	72	0	1.34546	0	3.47576	1301.75	0.642364	1.86187	2.43721	ENST00000345122	137	3	2	9	72	0	0	4.47346	0	0	2.42253	2.23607	ENSPTRT00000059541	384	1	2	9	72	4.17082	0.712572	2.75134	4.62282	0.87317	2.4818	0.689714	ENSMMUT00000022954	389	1	2	8	TRUE	TRUE
ENSMMUT00000022954_398	ENSPTRT00000059541_393	ENST00000345122_146	chr14:32090515:+	63	0	0	0	3.4838	1487.57	0.642233	1.52435	2.44137	ENST00000345122	146	5	3	8	63	0	0	1.49637	0	0	0.815898	2.23607	ENSPTRT00000059541	393	5	3	8	63	3.85054	0	2.75147	3.4558	0.87316	2.03362	0.765574	ENSMMUT00000022954	398	2	3	7	TRUE	TRUE
ENSMMUT00000022954_426	ENSPTRT00000059541_421	ENST00000345122_174	chr14:32090543:+	78	0	0	0	3.47043	0	0	0.0841603	2.44949	ENST00000345122	174	8	5	6	78	0	0	1.1239	0	0	0.669679	2.23607	ENSPTRT00000059541	421	7	5	6	78	0.56073	0	0.940358	2.84019	0	0.859023	1.35004	ENSMMUT00000022954	426	3	4	6	TRUE	TRUE
ENSMMUT00000022954_483	ENSPTRT00000059541_478	ENST00000345122_231	chr14:32090600:+	21	0	0	0	0	0	0	0	0	ENST00000345122	231	9	6	5	21	0	0	0	0	0	0	0	ENSPTRT00000059541	478	9	6	5	21	0	0	0	0	0	0	0	ENSMMUT00000022954	483	9	5	5	TRUE	TRUE
ENSMMUT00000022954_500	ENSPTRT00000059541_495	ENST00000345122_248	chr14:32090617:+	53	295.416	2.41771	0	3.4928	2592.68	0	6.52855	2.15726	ENST00000345122	248	1	7	4	53	0	0	1.86976	0	0	1.8167	2.23607	ENSPTRT00000059541	495	4	7	4	53	0.60764	0	0	0	0	0.038663	2.23607	ENSMMUT00000022954	500	4	6	4	TRUE	TRUE
ENSMMUT00000022954_525	ENSPTRT00000059541_520	ENST00000345122_273	chr14:32090642:+	18	867.891	12.0434	0	533.657	1735.33	0	5.56822	1.31926	ENST00000345122	273	2	8	3	18	0	0	1.8728	0	0	2.27923	2.23607	ENSPTRT00000059541	520	3	8	3	18	0.364647	0	0	0	0	0.0222977	2.23607	ENSMMUT00000022954	525	6	7	3	TRUE	TRUE
ENSMMUT00000022954_529	ENSPTRT00000059541_524	ENST00000345122_277	chr14:32090646:+	6	0	0	0	0	0	0	0	0	ENST00000345122	277	10	9	2	6	0	0	1.87385	0	0	2.28555	2.23607	ENSPTRT00000059541	524	2	9	2	6	0.36419	0	0	0	0	0.0241923	2.23607	ENSMMUT00000022954	529	5	8	2	TRUE	TRUE
ENSMMUT00000022954_539	ENSPTRT00000059541_534	ENST00000345122_287	chr14:32090656:+	14	0	0	0	685.844	0	0	0.438354	2.44949	ENST00000345122	287	6	10	1	14	0	0	0	0	0	0	0	ENSPTRT00000059541	534	10	10	1	14	0.303788	0	0	0	0	0.0204168	2.23607	ENSMMUT00000022954	539	7	9	1	TRUE	TRUE
ENSMMUT00000027927_114	ENSPTRT00000011486_259	ENST00000261475_326	chr14:35121988:-	29	0	0	0	10.5735	5.89646	1.14003	1.05814	1.49435	ENST00000261475	326	2	3	1	29	0	0	0	1.53859	0	0.303121	2.23607	ENSPTRT00000011486	259	2	2	1	29	0.849329	0.982882	0	0	0	0.4265	1.37536	ENSMMUT00000027927	114	1	2	1	TRUE	TRUE
ENSMMUT00000027927_25	ENSPTRT00000011486_170	ENST00000261475_237	chr14:35122077:-	24	0.374448	1.61519	0	1.18	13.7363	5.97254	1.91439	1.39396	ENST00000261475	237	1	2	2	24	0	1.03018	0.674929	2.16761	0	0.976541	1.15762	ENSPTRT00000011486	170	1	1	2	24	2.12243	0	0	0	0	0.321656	2.23607	ENSMMUT00000027927	25	2	1	2	TRUE	TRUE
ENSMMUT00000004505_38	ENSPTRT00000011525_20	ENST00000307712_22	chr14:39103214:-	57	8.06872	2.35471	5.79254	12.336	6.87466	2.27889	4.68013	0.603354	ENST00000307712	22	1	1	1	57	15.8175	6.817	6.94022	0.853131	7.41962	5.57965	0.705652	ENSPTRT00000011525	20	1	1	1	57	1.74013	2.69137	1.98838	1.09574	1.70048	1.81981	0.312856	ENSMMUT00000004505	38	1	1	1	TRUE	TRUE
ENSMMUT00000039899_316	ENSPTRT00000011527_77	ENST00000308317_76	chr14:39114298:+	8	2.2431	5533	0	1.76967	0	1.92333	3.80983	2.44634	ENST00000308317	76	1	1	1	8	0	0	0	2.16503	0	0.30669	2.23607	ENSPTRT00000011527	77	1	1	1	14	0	0	0	0	0	0	0	ENSMMUT00000039899	316	0	4	1	TRUE	TRUE
ENSMMUT00000047313_456	ENSPTRT00000001239_460	ENST00000372343_218	chr1:43947167:+	15	20.1183	7.0635	0	3.5276	11.7644	3.20384	4.4471	0.961692	ENST00000372343	218	2	1	2	15	0	0	0	0.310261	0	0.0639365	2.23607	ENSPTRT00000001239	460	3	2	2	15	3.47316	1.19672	0	0	0	0.994527	1.6179	ENSMMUT00000047313	456	2	2	2	TRUE	TRUE
ENSMMUT00000047313_756	ENSPTRT00000001239_760	ENST00000372343_518	chr1:43947467:+	60	4.47905	0	23.4052	0	0	8.90073	6.23888	1.49771	ENST00000372343	518	1	2	1	60	22.6482	2.86433	3.57413	0	7.38824	4.85164	1.23072	ENSPTRT00000001239	760	1	3	1	60	7.2418	1.45002	1.52338	3.6398	0	1.95413	1.01629	ENSMMUT00000047313	756	1	3	1	TRUE	TRUE
ENSMMUT00000069789_171	ENSPTRT00000105667_1171	ENST00000360584_156	chr1:44017170:-	37	0	0	0	0	0	0	0	0	ENST00000360584	156	0	3	1	37	0	0	0	0	0	0	0	ENSPTRT00000105667	1171	0	14	1	37	0	0	0	0	0	0	0	ENSMMUT00000069789	171	0	3	1	TRUE	TRUE
ENSMMUT00000069789_119	ENSPTRT00000105667_1119	ENST00000360584_104	chr1:44017222:-	9	0	0	0	0	0	0	0	0	ENST00000360584	104	0	2	2	9	0	0	0	0	0	0	0	ENSPTRT00000105667	1119	0	13	2	9	0	0	0	0	0	0	0	ENSMMUT00000069789	119	0	2	2	TRUE	TRUE
ENSMMUT00000069789_60	ENSPTRT00000105667_1060	ENST00000360584_45	chr1:44017281:-	63	0	0	0	0	0	0	0	0	ENST00000360584	45	0	1	3	63	0	0	0	0	0	0	0	ENSPTRT00000105667	1060	0	12	3	63	0	0	0	0	0	0	0	ENSMMUT00000069789	60	0	1	3	TRUE	TRUE
ENSMMUT00000062053_621	ENSPTRT00000043040_395	ENST00000355081_159	chr14:44960974:-	46	0	0	0	0	0	0	0	0	ENST00000355081	159	0	2	1	46	0	0	570.942	0	0	4.19154	2.23607	ENSPTRT00000043040	395	1	3	1	46	0	0	0	0	0	0	0	ENSMMUT00000062053	621	0	4	1	TRUE	TRUE
ENSMMUT00000062053_560	ENSPTRT00000043040_334	ENST00000355081_98	chr14:44961035:-	107	0	0	0	0	0	0	0	0	ENST00000355081	98	0	1	2	107	0	0	246.022	0	0	4.0904	2.23607	ENSPTRT00000043040	334	2	2	2	107	0	0	0	0	0	0	0	ENSMMUT00000062053	560	0	3	2	TRUE	TRUE
ENSMMUT00000058448_8	ENSPTRT00000044705_7	ENST00000355765_9	chr14:45084107:+	78	0.432131	0	0	0	0	0.380622	0.182795	1.55385	ENST00000355765	9	2	1	2	78	0	0	0.108102	0	0	0.0264845	2.23607	ENSPTRT00000044705	7	2	1	2	78	0	0	0	0	1.39095	0.182646	2.23607	ENSMMUT00000058448	8	1	1	2	TRUE	TRUE
ENSMMUT00000058448_124	ENSPTRT00000044705_123	ENST00000355765_125	chr14:45084223:+	39	0.811896	1.28493	0	0.674815	3.19829	0.237703	0.825719	1.1129	ENST00000355765	125	1	2	1	39	1.05061	0.319876	0.163759	0.867326	0	0.456127	0.949334	ENSPTRT00000044705	123	1	2	1	39	0.287557	0	0	0	0	0.0476314	2.23607	ENSMMUT00000058448	124	2	2	1	TRUE	TRUE
ENSMMUT00000023194_517	ENSPTRT00000011553_319	ENST00000267430_26	chr14:45135955:+	77	0	3.45186	0	10.3586	0	0.515491	2.02425	1.72965	ENST00000267430	26	1	1	1	77	0	0	0	0	0	0	0	ENSPTRT00000011553	319	0	6	1	77	0	2.6529	0	0	0	0.575511	2.23607	ENSMMUT00000023194	517	3	8	1	TRUE	TRUE
ENSMMUT00000018720_102	ENSPTRT00000049901_295	ENST00000458657_263	chr1:44688297:+	18	0	0	0	0	0	0	0	0	ENST00000458657	263	2	2	1	18	0	0	0	0	0	0	0	ENSPTRT00000049901	295	0	3	1	21	0	0	0	0	0	0	0	ENSMMUT00000018720	102	0	1	1	TRUE	TRUE
ENSMMUT00000073733_31	ENSPTRT00000043330_85	ENST00000216373_271	chr14:50231308:-	25	3.73433	0	0	0	0	1254.5	3.4186	2.44078	ENST00000216373	271	1	1	1	25	0	0	1.57361	0	0	0.754531	2.23607	ENSPTRT00000043330	85	1	1	1	25	9.03878	0	0	0	0	0.62267	2.23607	ENSMMUT00000073733	31	1	1	1	TRUE	TRUE
ENSMMUT00000028919_366	ENSPTRT00000011589_17	ENST00000013125_234	chr14:50532135:-	33	473.849	1.00965	25.8114	28.0037	1136.2	1.70761	5.61143	1.65297	ENST00000013125	234	1	1	1	33	0	0	1.12401	0	0	0.161202	2.23607	ENSPTRT00000011589	17	1	1	1	33	1.15792	0	1.97544	3.82108	5.31522	2.52035	0.864133	ENSMMUT00000028919	366	1	1	1	TRUE	TRUE
ENSMMUT00000020560_203	ENSPTRT00000089605_210	ENST00000245441_187	chr14:50822061:-	5	0	0	0	1.77009	0	0.213877	0.124772	2.14825	ENST00000245441	187	2	2	1	5	0	0	0	0	0	0	0	ENSPTRT00000089605	210	2	2	1	5	0	0	0	0	0	0	0	ENSMMUT00000020560	203	2	2	1	TRUE	TRUE
ENSMMUT00000020560_90	ENSPTRT00000089605_97	ENST00000245441_74	chr14:50831048:-	30	7022.81	0	100.647	6392.88	8.52142	8.85473	11.0982	1.53156	ENST00000245441	74	1	1	2	30	4.54894	2.832	14.232	6.18733	4.19371	6.59309	0.709351	ENSPTRT00000089605	97	1	1	2	30	8.17299	0	0	5.0378	0	2.13833	1.43213	ENSMMUT00000020560	90	1	1	2	TRUE	TRUE
ENSMMUT00000025682_227	ENSPTRT00000087153_513	ENST00000344768_53	chr14:51689693:+	15	0	36.1554	90.9071	640.188	2082.2	20.4265	37.2771	1.71963	ENST00000344768	53	1	1	3	15	0	0	10238.2	0	0	18.6583	2.23607	ENSPTRT00000087153	513	1	1	4	15	0	0	0	0	0	0	0	ENSMMUT00000025682	227	0	2	4	TRUE	TRUE
ENSMMUT00000025682_254	ENSPTRT00000087153_540	ENST00000344768_80	chr14:51689720:+	24	13.3817	0	0	0	0	0	6.02297	2.44949	ENST00000344768	80	2	2	2	24	0	0	8.93976	0	0	14.1279	2.23607	ENSPTRT00000087153	540	2	3	2	24	0	0	0	0	0	0	0	ENSMMUT00000025682	254	0	4	2	TRUE	TRUE
ENSMMUT00000025682_277	ENSPTRT00000087153_563	ENST00000344768_103	chr14:51689743:+	72	0	0	0	0	0	2.547	1.21468	2.44949	ENST00000344768	103	3	3	1	72	0	0	0	0	0	0	0	ENSPTRT00000087153	563	4	4	1	72	0	0	0	0	0	0	0	ENSMMUT00000025682	277	0	5	1	TRUE	TRUE
ENSMMUT00000000029_49	ENSPTRT00000011619_140	ENST00000245457_35	chr14:52314346:+	203	0	0	0	0	0	3.75626	2.16844	2.44949	ENST00000245457	35	1	1	1	203	437.905	0	19.4499	1.08371	0	2.19475	2.1128	ENSPTRT00000011619	140	1	1	1	203	2.16164	5.55493	3.49954	6.12203	6.78655	4.89244	0.400187	ENSMMUT00000000029	49	1	1	1	TRUE	TRUE
ENSMMUT00000066513_363	ENSPTRT00000098115_366	ENST00000281741_293	chr14:52544269:-	18	4.48005	6.71857	0	1066.31	0	1741.97	7.59081	1.60569	ENST00000281741	293	1	1	1	18	0	0	0	5.4172	19.7235	5.39488	1.6991	ENSPTRT00000098115	366	1	1	1	30	0	0	0	0	0	0	0	ENSMMUT00000066513	363	0	1	1	TRUE	TRUE
ENSMMUT00000059832_361	ENSPTRT00000001280_739	ENST00000372086_351	chr1:45457833:-	21	0	0	0	0	6.87282	0	0.534677	2.44949	ENST00000372086	351	2	3	1	21	0	0	0	0	0	0	0	ENSPTRT00000001280	739	3	3	1	21	0	0	0	0	0	0	0	ENSMMUT00000059832	361	3	3	1	TRUE	TRUE
ENSMMUT00000059832_250	ENSPTRT00000001280_628	ENST00000372086_240	chr1:45490924:-	132	0	0	0	0	3.42094	0.129203	0.221453	2.34414	ENST00000372086	240	3	2	2	132	0	0	0.875256	0.316853	0	0.283406	1.60021	ENSPTRT00000001280	628	2	2	2	132	0.375393	0	0	0	0	0.0667529	2.23607	ENSMMUT00000059832	250	2	2	2	TRUE	TRUE
ENSMMUT00000059832_125	ENSPTRT00000001280_503	ENST00000372086_115	chr1:45491049:-	90	6.69672	0	21.5343	10.4674	7.78064	7.64675	7.26837	0.782093	ENST00000372086	115	1	1	3	90	16.5109	5.7579	750.066	7.91443	0	8.95411	2.12828	ENSPTRT00000001280	503	1	1	3	90	5.41967	4.51297	8.13336	0	55.0208	6.97022	1.55809	ENSMMUT00000059832	125	1	1	3	TRUE	TRUE
ENSMMUT00000002774_1341	ENSPTRT00000001299_1466	ENST00000355105_1229	chr1:45659123:-	36	0.52114	0.911967	0	1.549	0.061871	0.171146	0.38578	1.12373	ENST00000355105	1229	15	20	1	36	0.309998	0.720298	0.30225	0	0	0.353512	1.11174	ENSPTRT00000001299	1466	11	23	1	36	0.251147	0	0.177953	0.0209044	0	0.087048	1.29906	ENSMMUT00000002774	1341	14	20	1	TRUE	TRUE
ENSMMUT00000002774_1331	ENSPTRT00000001299_1456	ENST00000355105_1219	chr1:45659133:-	27	0.604356	1.363	1.51398	1.44864	0	0.0421919	0.649312	0.852438	ENST00000355105	1219	13	19	2	27	0.294351	0.752159	0.0987793	0	0	0.314987	1.38022	ENSPTRT00000001299	1456	12	22	2	27	0.280082	0	0.209321	0	0.212145	0.143015	0.934933	ENSMMUT00000002774	1331	12	19	2	TRUE	TRUE
ENSMMUT00000002774_1145	ENSPTRT00000001299_1270	ENST00000355105_1033	chr1:45660360:-	12	0	0	0	0	0	0.114088	0.0375978	2.44949	ENST00000355105	1033	20	18	3	12	0	0	0.17647	0	0	0.0537239	2.23607	ENSPTRT00000001299	1270	20	21	3	12	0	0	0	0	0	0	0	ENSMMUT00000002774	1145	18	18	3	TRUE	TRUE
ENSMMUT00000002774_1073	ENSPTRT00000001299_1198	ENST00000355105_961	chr1:45660432:-	66	0	1.99055	0	1.76995	0.576572	0.21768	0.656486	1.18077	ENST00000355105	961	12	17	4	66	0	0	0.387097	0.752945	0	0.233147	1.48217	ENSPTRT00000001299	1198	14	20	4	66	0.199289	0	1.74994	0	0	0.356375	1.96282	ENSMMUT00000002774	1073	8	17	4	TRUE	TRUE
ENSMMUT00000002774_1055	ENSPTRT00000001299_1180	ENST00000355105_943	chr1:45660450:-	6	0	0	0	0.787076	0	0.641354	0.163615	1.56124	ENST00000355105	943	18	16	5	6	0	0	0	0	0	0	0	ENSPTRT00000001299	1180	22	19	5	6	0.06281	0	0	0	0	0.012097	2.23607	ENSMMUT00000002774	1055	17	16	5	TRUE	TRUE
ENSMMUT00000002774_1008	ENSPTRT00000001299_1133	ENST00000355105_896	chr1:45660497:-	9	0	0.218375	0	1.77038	0	0.17107	0.141245	1.93813	ENST00000355105	896	19	15	6	9	0	0	0	0	0	0	0	ENSPTRT00000001299	1133	21	18	6	9	0.147614	0	0	0	0	0.0246569	2.23607	ENSMMUT00000002774	1008	16	15	6	TRUE	TRUE
ENSMMUT00000002774_957	ENSPTRT00000001299_1082	ENST00000355105_845	chr1:45660548:-	51	3.2478	2.93638	7.5315	13.7462	5.1056	2.21107	4.12531	0.748893	ENST00000355105	845	1	14	7	51	2.04643	0.335011	0.749815	1.77382	3.43299	1.22275	0.727637	ENSPTRT00000001299	1082	2	17	7	51	1.73867	1.0498	1.76218	1.18716	0.568573	1.23145	0.398176	ENSMMUT00000002774	957	4	14	7	TRUE	TRUE
ENSMMUT00000002774_925	ENSPTRT00000001299_1050	ENST00000355105_813	chr1:45660580:-	45	2.19317	1.54653	4.3108	6.86914	4.35051	1.60312	2.66378	0.600916	ENST00000355105	813	3	13	8	45	1.07396	0.572417	0.907612	1.79103	5.10943	1.2805	0.980216	ENSPTRT00000001299	1050	1	16	8	45	1.06813	0.525854	2.64443	0	0.539864	0.898766	1.06398	ENSMMUT00000002774	925	5	13	8	TRUE	TRUE
ENSMMUT00000002774_914	ENSPTRT00000001299_1039	ENST00000355105_802	chr1:45660591:-	15	4.00341	2.65938	1.27399	6.49125	6.94853	2.09256	3.57668	0.601958	ENST00000355105	802	2	12	9	15	0.0746176	0.78355	1.03811	1.40296	1.06606	1.00236	0.570061	ENSPTRT00000001299	1039	3	15	9	15	2.42623	0	1.55036	0	0.989507	0.806803	1.04837	ENSMMUT00000002774	914	6	12	9	TRUE	TRUE
ENSMMUT00000002774_870	ENSPTRT00000001299_995	ENST00000355105_758	chr1:45660635:-	24	1.45583	0.468317	0.773242	3.96555	4.08812	1.12869	1.33397	0.818371	ENST00000355105	758	7	11	10	24	0	0.375543	0.605602	0.960232	0.528479	0.532089	0.707881	ENSPTRT00000001299	995	8	14	10	24	0.195082	0	1.72443	0	0	0.304074	1.96436	ENSMMUT00000002774	870	9	11	10	TRUE	TRUE
ENSMMUT00000002774_807	ENSPTRT00000001299_933	ENST00000355105_695	chr1:45660698:-	15	0	0.757289	0	0	6.23174	0.359197	0.713045	2.01791	ENST00000355105	695	11	10	11	15	0	0	0	0.368256	0	0.0720605	2.23607	ENSPTRT00000001299	933	17	13	11	15	1.01909	0	0	0	0	0.130645	2.23607	ENSMMUT00000002774	807	13	10	11	TRUE	TRUE
ENSMMUT00000002774_801	ENSPTRT00000001299_927	ENST00000355105_689	chr1:45660704:-	21	0.561354	0.757306	0	0	7.21361	0.41052	0.868986	1.89208	ENST00000355105	689	8	9	12	21	0	0	0	0.368281	0	0.0717871	2.23607	ENSPTRT00000001299	927	18	12	12	21	0.943615	0	0	0.514927	0	0.26718	1.46457	ENSMMUT00000002774	801	10	9	12	TRUE	TRUE
ENSMMUT00000002774_773	ENSPTRT00000001299_899	ENST00000355105_661	chr1:45660732:-	18	0	0	0	1.76995	1.07408	0.0504086	0.164275	1.57669	ENST00000355105	661	17	8	13	18	0.778266	0	0.160753	0.490985	0	0.23704	1.19038	ENSPTRT00000001299	899	13	11	13	18	1.11534	0	0	0	0	0.145463	2.23607	ENSMMUT00000002774	773	11	8	13	TRUE	TRUE
ENSMMUT00000002774_692	ENSPTRT00000001299_818	ENST00000355105_580	chr1:45660813:-	24	1.74556	1.68261	0	0.817418	0	0.524793	0.779406	0.978951	ENST00000355105	580	10	6	15	24	0	0.836006	0.693963	1.06366	0.942127	0.724386	0.591213	ENSPTRT00000001299	818	6	9	15	24	0.420035	0.967112	1.47007	0	0	0.479983	1.12055	ENSMMUT00000002774	692	7	7	14	TRUE	TRUE
ENSMMUT00000002774_509	ENSPTRT00000001299_646	ENST00000355105_407	chr1:45660986:-	9	2.35125	0	0	0.758973	0	0.162912	0.32194	1.7089	ENST00000355105	407	16	5	16	9	0	0	0.0140911	0.391028	0	0.065629	2.14017	ENSPTRT00000001299	646	19	8	16	9	0.28002	0	0	0	0	0.0384667	2.23607	ENSMMUT00000002774	509	15	6	15	TRUE	TRUE
ENSMMUT00000002774_317	ENSPTRT00000001299_453	ENST00000355105_214	chr1:45661179:-	15	1.14962	2.25094	1.02021	2.72395	15.5685	1.55742	2.42765	1.40488	ENST00000355105	214	6	4	17	18	0	1.16529	0.434895	0.433683	0	0.511874	1.17115	ENSPTRT00000001299	453	9	7	17	15	1.5794	0	3.29896	1.2805	0.408234	1.30529	0.974929	ENSMMUT00000002774	317	1	5	16	TRUE	TRUE
ENSMMUT00000002774_297	ENSPTRT00000001299_433	ENST00000355105_194	chr1:45661199:-	42	1.42432	1.91819	1.55062	3.54029	12.2983	1.95245	2.54487	1.12184	ENST00000355105	194	4	3	18	42	0	0.826587	0.46015	0.669906	0	0.509866	0.971444	ENSPTRT00000001299	433	10	6	18	42	2.30696	0	2.61629	1.09402	0.420204	1.23288	0.890016	ENSMMUT00000002774	297	3	3	18	TRUE	TRUE
ENSMMUT00000021562_8	ENSPTRT00000001305_208	ENST00000361297_183	chr1:45803794:+	78	0	0	0	0	0	0	0	0	ENST00000361297	183	2	2	1	78	4.9872	3.85364	25.2972	0	8.71649	5.72556	1.14962	ENSPTRT00000001305	208	2	2	1	78	312.327	0	0	0	1809.72	14.9124	1.8523	ENSMMUT00000021562	8	1	1	1	TRUE	TRUE
ENSMMUT00000023101_145	ENSPTRT00000001311_152	ENST00000372003_152	chr1:46175238:+	42	0	0	0	0	0	0	0	0	ENST00000372003	152	0	1	5	42	0	0	0	0	0	0	0	ENSPTRT00000001311	152	0	1	5	42	0	0	0	0	0	0	0	ENSMMUT00000023101	145	0	1	7	TRUE	TRUE
ENSMMUT00000023101_207	ENSPTRT00000001311_214	ENST00000372003_214	chr1:46175300:+	21	0	0	0	0	0	0	0	0	ENST00000372003	214	0	2	4	21	0	0	0	0	0	0	0	ENSPTRT00000001311	214	0	2	4	21	0	0	0	0	0	0	0	ENSMMUT00000023101	207	0	3	5	TRUE	TRUE
ENSMMUT00000023101_236	ENSPTRT00000001311_243	ENST00000372003_243	chr1:46175329:+	51	0	0	0	0	0	0	0	0	ENST00000372003	243	0	3	3	51	0	0	0	0	0	0	0	ENSPTRT00000001311	243	0	3	3	69	0	0	0	0	0	0	0	ENSMMUT00000023101	236	0	4	4	TRUE	TRUE
ENSMMUT00000023101_243	ENSPTRT00000001311_250	ENST00000372003_250	chr1:46175336:+	63	0	0	0	0	0	0	0	0	ENST00000372003	250	0	4	2	63	0	0	0	0	0	0	0	ENSPTRT00000001311	250	0	4	2	210	0	0	0	0	0	0	0	ENSMMUT00000023101	243	0	5	3	TRUE	TRUE
ENSMMUT00000023101_282	ENSPTRT00000001311_290	ENST00000372003_290	chr1:46175376:+	175	0	0	0	0	0	0	0	0	ENST00000372003	290	0	5	1	175	0	0	0	0	0	0	0	ENSPTRT00000001311	290	0	5	1	171	0	0	0	0	0	0	0	ENSMMUT00000023101	282	0	6	2	TRUE	TRUE
ENSMMUT00000047232_143	ENSPTRT00000001312_23	ENST00000371992_614	chr1:46197859:-	24	0	0	0	2.65254	0	0.932863	0.822148	1.79671	ENST00000371992	614	3	5	1	24	0	0	0	0.619652	0	0.177717	2.23607	ENSPTRT00000001312	23	1	1	1	24	1.29955	0	0	3.52998	1.3356	1.0877	1.17048	ENSMMUT00000047232	143	2	2	1	TRUE	TRUE
ENSMMUT00000016206_246	ENSPTRT00000001315_676	ENST00000371975_501	chr1:46248263:+	15	0	0	0	0	0	0.183518	0.0531277	2.44949	ENST00000371975	501	3	2	3	15	0	0	0	0	0	0	0	ENSPTRT00000001315	676	4	3	3	15	0	0	0	0	0	0	0	ENSMMUT00000016206	246	0	1	3	TRUE	TRUE
ENSMMUT00000016206_280	ENSPTRT00000001315_710	ENST00000371975_535	chr1:46248297:+	6	0	0	0	0	0	0	0	0	ENST00000371975	535	4	3	2	6	0	0	0	0	0	0	0	ENSPTRT00000001315	710	5	4	2	6	0	0	0	0	0	0	0	ENSMMUT00000016206	280	0	2	2	TRUE	TRUE
ENSMMUT00000016206_357	ENSPTRT00000001315_784	ENST00000371975_609	chr1:46248371:+	12	1.49621	5.38381	0	7.78552	7.37854	5.64171	4.20892	0.687782	ENST00000371975	609	2	4	1	12	0	0	3.55977	0.21715	0	0.779236	2.0791	ENSPTRT00000001315	784	3	5	1	12	0	0	0	0	0	0	0	ENSMMUT00000016206	357	0	3	1	TRUE	TRUE
ENSMMUT00000039800_131	ENSPTRT00000011823_5	ENST00000360689_1502	chr14:65561338:+	6	0.408189	0	0	1.01188	6.46881	1.39915	1.39897	1.59851	ENST00000360689	1502	5	21	4	6	0	0	0	0	0	0	0	ENSPTRT00000011823	5	4	1	4	6	0	0	0	0	0	0	0	ENSMMUT00000039800	131	2	3	4	TRUE	TRUE
ENSMMUT00000039800_142	ENSPTRT00000011823_16	ENST00000360689_1513	chr14:65561349:+	87	1.02023	0.17346	0	1.35381	2.34255	0.937334	0.901157	0.874896	ENST00000360689	1513	8	22	3	87	0.370008	0.292661	0.33144	0.869846	1.65971	0.572465	0.82753	ENSPTRT00000011823	16	1	2	3	87	0	0	0	0	0	0	0	ENSMMUT00000039800	142	3	4	3	TRUE	TRUE
ENSMMUT00000039800_244	ENSPTRT00000011823_118	ENST00000360689_1615	chr14:65561451:+	9	2.08401	1.34617	1.92031	2.12471	8.93549	1.11531	2.70476	1.01846	ENST00000360689	1615	1	23	2	9	0	0.760776	0.439639	0.371729	0.499069	0.430839	0.662578	ENSPTRT00000011823	118	3	3	2	9	1.09183	0.66528	0	0	0	0.398311	1.43498	ENSMMUT00000039800	244	1	5	2	TRUE	TRUE
ENSMMUT00000039800_301	ENSPTRT00000011823_175	ENST00000360689_1672	chr14:65561508:+	18	0	0	0	0.885449	0	0.481174	0.345019	1.64774	ENST00000360689	1672	9	24	1	18	0	0	0.453524	1.73447	0.990271	0.532317	1.15991	ENSPTRT00000011823	175	2	4	1	18	0	0	0	0	0	0	0	ENSMMUT00000039800	301	4	6	1	TRUE	TRUE
ENSMMUT00000030149_92	ENSPTRT00000011834_517	ENST00000261681_518	chr14:67279027:+	18	0	0	0	3.53318	0	0	0.306517	2.44949	ENST00000261681	518	5	2	4	18	0	0	0	0	0	0	0	ENSPTRT00000011834	517	4	2	4	18	0.910145	0	0	0	0	0.0721427	2.23607	ENSMMUT00000030149	92	3	1	4	TRUE	TRUE
ENSMMUT00000030149_117	ENSPTRT00000011834_542	ENST00000261681_543	chr14:67279052:+	6	0	0	0	7.07648	31.4499	0	10.1562	1.95981	ENST00000261681	543	1	3	3	6	0	0	8115.89	0	0	2.37892	2.23607	ENSPTRT00000011834	542	1	3	3	6	9107.31	0	0	21.824	9.19961	9.87384	2.22658	ENSMMUT00000030149	117	1	2	3	TRUE	TRUE
ENSMMUT00000030149_122	ENSPTRT00000011834_547	ENST00000261681_548	chr14:67279057:+	6	0	0	0	5.30764	0	0	1.14445	2.44949	ENST00000261681	548	4	4	2	6	0	0	0	0	0	0	0	ENSPTRT00000011834	547	5	4	2	6	0	0	0	0	0	0	0	ENSMMUT00000030149	122	4	3	2	TRUE	TRUE
ENSMMUT00000030149_172	ENSPTRT00000011834_579	ENST00000261681_577	chr14:67279086:+	57	0	0	0	3.51513	8.6371	1.28196	4.05304	1.52794	ENST00000261681	577	3	5	1	57	1.99831	0	0	5.75082	0	0.955479	1.61487	ENSPTRT00000011834	579	3	5	1	57	5.0815	0	0	0	0	0.52307	2.23607	ENSMMUT00000030149	172	2	4	1	TRUE	TRUE
ENSMMUT00000022299_39	ENSPTRT00000011845_306	ENST00000554659_53	chr14:67674580:-	24	12.1736	8.06846	5.83979	14.9397	40.5973	20.9234	13.0362	0.741996	ENST00000554659	53	1	1	1	24	42.9477	15.1135	46.5446	12.1238	19.6907	26.5663	0.594367	ENSPTRT00000011845	306	1	1	1	24	6.5473	7.23771	79.0365	7.35205	31.8066	17.0008	1.18657	ENSMMUT00000022299	39	1	1	1	TRUE	TRUE
ENSMMUT00000069467_205	ENSPTRT00000085522_1530	ENST00000336440_1538	chr14:68793199:-	57	0	0	0	0	0	0	0	0	ENST00000336440	1538	5	14	1	57	15.0807	0	0	0	0	3.36857	2.23607	ENSPTRT00000085522	1530	1	12	1	57	0	0	0	0	0	0	0	ENSMMUT00000069467	205	0	1	1	TRUE	TRUE
ENSMMUT00000028870_406	ENSPTRT00000088399_325	ENST00000312994_292	chr14:69209441:+	12	0	0	0	0	0	2.56319	0.832858	2.44949	ENST00000312994	292	1	1	1	12	0	0	0	1.23886	0	0.488938	2.23607	ENSPTRT00000088399	325	1	3	1	12	0	0	0	5.71472	0	1.33446	2.23607	ENSMMUT00000028870	406	1	3	1	TRUE	TRUE
ENSMMUT00000030357_47	ENSPTRT00000011872_42	ENST00000336643_23	chr14:69398714:+	108	8.5059	5.34958	0	135.441	51.264	8.4224	9.90514	1.51188	ENST00000336643	23	1	2	3	108	24.0506	5.42592	19.9741	7.13241	26.2631	12.4519	0.584179	ENSPTRT00000011872	42	1	4	3	108	8.56159	3.48846	3.81659	6.45876	12.1101	6.81267	0.519712	ENSMMUT00000030357	47	2	3	3	TRUE	TRUE
ENSMMUT00000030357_101	ENSPTRT00000011872_96	ENST00000336643_77	chr14:69398768:+	54	0	3.64614	0	33.3229	25.9858	4.46315	4.87265	1.29665	ENST00000336643	77	3	3	2	54	0	0	4.86988	3.99268	0	2.82108	1.38044	ENSPTRT00000011872	96	5	5	2	54	2.85754	3.52212	1.73832	1.88308	3.67336	2.77803	0.328787	ENSMMUT00000030357	101	3	4	2	TRUE	TRUE
ENSMMUT00000030357_438	ENSPTRT00000011872_437	ENST00000336643_418	chr14:69399109:+	15	5.23419	0	0	4.24633	7.21068	2.79764	2.47566	0.891717	ENST00000336643	418	4	4	1	15	5.83253	0.10333	22.4442	2.16807	9.22335	3.54655	1.10887	ENSPTRT00000011872	437	4	6	1	48	2.79771	0.544258	0.711497	0	0	0.505166	1.4257	ENSMMUT00000030357	438	4	5	1	TRUE	TRUE
ENSMMUT00000058693_180	ENSPTRT00000046123_669	ENST00000555818_54	chr14:71587578:+	81	0.748827	0	0	10.3452	5.60639	0.350197	1.01747	1.49862	ENST00000555818	54	4	2	6	81	0	0	278.432	1.2254	2.49017	1.46376	2.19934	ENSPTRT00000046123	669	5	17	6	81	3.96394	3.60153	0	0	0	1.23309	1.37192	ENSMMUT00000058693	180	1	7	6	TRUE	TRUE
ENSMMUT00000058693_188	ENSPTRT00000046123_677	ENST00000555818_62	chr14:71587586:+	24	1.34624	0	0	0	3.75752	0.256816	0.690251	1.67579	ENST00000555818	62	5	3	5	24	0	0	937.333	0.843246	0	0.813935	2.23356	ENSPTRT00000046123	677	7	18	5	24	2.02119	0	0	0	0	0.49782	2.23607	ENSMMUT00000058693	188	5	8	5	TRUE	TRUE
ENSMMUT00000058693_345	ENSPTRT00000046123_834	ENST00000555818_219	chr14:71587743:+	75	2.58721	1.44209	0	26.2128	2.93099	0.625893	1.24651	1.80071	ENST00000555818	219	2	4	4	75	0	0	4.45953	0.722923	1.89768	1.11037	1.3205	ENSPTRT00000046123	834	6	19	4	75	0.910029	0	3.38466	0	0	1.06864	1.70662	ENSMMUT00000058693	345	2	9	4	TRUE	TRUE
ENSMMUT00000058693_365	ENSPTRT00000046123_854	ENST00000555818_239	chr14:71587763:+	110	2.50579	1.24248	0	17.3753	4.70045	0.607929	1.26668	1.49111	ENST00000555818	239	1	5	3	110	0	0	5.3064	1.10924	12.3363	3.02426	1.40616	ENSPTRT00000046123	854	3	20	3	110	0.856657	0	3.15815	0	0	1.02289	1.70351	ENSMMUT00000058693	365	3	10	3	TRUE	TRUE
ENSMMUT00000058693_429	ENSPTRT00000046123_918	ENST00000555818_303	chr14:71587827:+	27	1.12215	0.673217	0	0	0	0.513335	0.531235	1.21209	ENST00000555818	303	6	6	2	27	0	0	1526.88	1.44533	26.9365	4.37592	2.18537	ENSPTRT00000046123	918	2	21	2	27	0	0	0	0	0	0	0	ENSMMUT00000058693	429	10	11	2	TRUE	TRUE
ENSMMUT00000058693_432	ENSPTRT00000046123_921	ENST00000555818_306	chr14:71587830:+	24	1.12216	0.673205	0	0	0	0.513303	0.531193	1.2121	ENST00000555818	306	7	7	1	24	0	0	1717.61	1.44535	26.9443	4.37651	2.19087	ENSPTRT00000046123	921	1	22	1	24	0	0	0	0	0	0	0	ENSMMUT00000058693	432	11	12	1	TRUE	TRUE
ENSMMUT00000039688_191	ENSPTRT00000011931_684	ENST00000324501_149	chr14:73147866:+	64	3.94541	1.78904	2.13408	3.00799	18.9753	1.06882	2.58196	1.32811	ENST00000324501	149	1	1	1	64	0.404218	1.54507	1.06326	0.909301	2.45436	1.08899	0.607495	ENSPTRT00000011931	684	6	8	1	64	1.19831	0.604743	0.497427	1.48371	0	0.732311	0.777899	ENSMMUT00000039688	191	1	1	1	TRUE	TRUE
ENSMMUT00000006935_3579	ENSPTRT00000011961_3559	ENST00000423556_197	chr14:73740059:-	15	1.1222	4.03796	0	640.188	7493.32	0.732988	2.74113	2.22416	ENST00000423556	197	1	2	1	15	0	0	0	0	0	0	0	ENSPTRT00000011961	3559	28	36	1	15	1.03986	0	1.86292	0	0	0.625714	1.45816	ENSMMUT00000006935	3579	4	32	1	TRUE	TRUE
ENSMMUT00000006935_3406	ENSPTRT00000011961_3386	ENST00000423556_24	chr14:73740232:-	18	0	0	0	3.53318	5.87995	0.285261	0.486046	1.55189	ENST00000423556	24	2	1	2	18	0	0	0	0.482013	0	0.183705	2.23607	ENSPTRT00000011961	3386	4	35	2	18	1.81892	4.48594	0	0	0	1.19331	1.56019	ENSMMUT00000006935	3406	3	31	2	TRUE	TRUE
ENSMMUT00000017785_17	ENSPTRT00000011973_17	ENST00000553458_22	chr14:74084472:-	27	0	0	0	0	0	0	0	0	ENST00000553458	22	0	2	1	27	0	0	555.864	0	26.1262	15.246	2.11283	ENSPTRT00000011973	17	1	1	1	27	0	0	0	0	1742.73	6.60783	2.23607	ENSMMUT00000017785	17	1	1	1	TRUE	TRUE
ENSMMUT00000005429_143	ENSPTRT00000012026_53	ENST00000286639_57	chr14:75522481:+	147	2.31898	1.50263	2.0864	2.61546	1.14557	2.1405	1.86471	0.276336	ENST00000286639	57	1	1	1	147	2.04815	3.4573	2.69418	1.09728	4.64711	2.9255	0.48504	ENSPTRT00000012026	53	1	1	1	147	0.389689	2.25519	1.80577	0.925839	2.59725	1.57456	0.576871	ENSMMUT00000005429	143	1	3	1	TRUE	TRUE
ENSMMUT00000016903_741	ENSPTRT00000012041_995	ENST00000238682_163	chr14:75981029:-	136	0	0	0	0	0	0	0	0	ENST00000238682	163	0	2	1	136	0	0	0	0	0	0	0	ENSPTRT00000012041	995	11	11	1	136	0	0	0	0	0	0	0	ENSMMUT00000016903	741	8	9	1	TRUE	TRUE
ENSMMUT00000016903_637	ENSPTRT00000012041_891	ENST00000238682_59	chr14:75981133:-	81	0	0	0	0	0	0	0	0	ENST00000238682	59	0	1	2	81	0	0	0	0	0	0	0	ENSPTRT00000012041	891	10	10	2	81	0	0	0	0	0	0	0	ENSMMUT00000016903	637	7	8	2	TRUE	TRUE
ENSMMUT00000012295_104	ENSPTRT00000012046_108	ENST00000261530_57	chr14:76154354:+	10	1.04744	0	0	14.118	0.843986	1.02609	0.824197	1.95347	ENST00000261530	57	1	1	1	10	0	0	1.1246	0	9.92249	1.33717	1.96393	ENSPTRT00000012046	108	1	2	1	10	0	3.08678	0	0.778659	0	1.04891	1.72894	ENSMMUT00000012295	104	1	2	1	TRUE	TRUE
ENSMMUT00000069871_191	ENSPTRT00000083440_2201	ENST00000167106_693	chr14:76762160:+	201	0	0	0	0	0	0	0	0	ENST00000167106	693	5	3	4	201	0	0	0	0	0	0	0	ENSPTRT00000083440	2201	9	17	4	225	0	0	0	0	0	0	0	ENSMMUT00000069871	191	0	1	4	TRUE	TRUE
ENSMMUT00000069871_366	ENSPTRT00000083440_2377	ENST00000167106_869	chr14:76762336:+	6	0	0	0	0	0	0	0	0	ENST00000167106	869	6	4	3	6	0	0	0	0	0	0	0	ENSPTRT00000083440	2377	10	18	3	6	0	0	0	0	0	0	0	ENSMMUT00000069871	366	0	2	3	TRUE	TRUE
ENSMMUT00000069871_559	ENSPTRT00000083440_2570	ENST00000167106_1062	chr14:76762529:+	84	0	0	0	0	0	0	0	0	ENST00000167106	1062	4	5	2	84	0	0	0	0	0	0	0	ENSPTRT00000083440	2570	11	19	2	84	0	0	0	0	0	0	0	ENSMMUT00000069871	559	0	3	2	TRUE	TRUE
ENSMMUT00000069871_765	ENSPTRT00000083440_2776	ENST00000167106_1268	chr14:76762735:+	42	0	0	0	0	0	1.28069	0.617048	2.44949	ENST00000167106	1268	3	6	1	42	0	0	0	0	0	0	0	ENSPTRT00000083440	2776	12	20	1	42	0	0	0	0	0	0	0	ENSMMUT00000069871	765	0	4	1	TRUE	TRUE
ENSMMUT00000005707_86	ENSPTRT00000097776_359	ENST00000334746_303	chr14:93296072:-	12	3.58946	20.1096	14.6758	4794.91	0	3.29688	5.93789	2.42418	ENST00000334746	303	3	5	1	12	0	0	4.48593	8.66243	0	1.33133	1.47997	ENSPTRT00000097776	359	4	5	1	12	0	0	0	0	0	0	0	ENSMMUT00000005707	86	3	3	1	TRUE	TRUE
ENSMMUT00000005707_7	ENSPTRT00000097776_280	ENST00000334746_224	chr14:93296151:-	30	5.59151	7.05108	0	0	3.9246	0	2.86618	1.15256	ENST00000334746	224	5	4	2	30	0	0	0.563295	0	0	0.185116	2.23607	ENSPTRT00000097776	280	5	4	2	30	0	0	0	0	0	0	0	ENSMMUT00000005707	7	2	2	2	TRUE	TRUE
ENSMMUT00000005707_3	ENSPTRT00000097776_276	ENST00000334746_220	chr14:93296155:-	39	1.28214	0	8.37954	738.525	0	7.03514	3.91355	2.38468	ENST00000334746	220	4	3	3	99	0	1.73689	2.91265	4.5072	0	2.08892	1.05903	ENSPTRT00000097776	276	2	3	3	99	0.910566	10.5558	0	0	0	0.994544	2.02143	ENSMMUT00000005707	3	1	1	3	TRUE	TRUE
ENSMMUT00000017387_484	ENSPTRT00000012280_277	ENST00000555019_282	chr14:93976510:-	9	0	0	0	0	0	0	0	0	ENST00000555019	282	6	6	1	9	0	0	0	0	0	0	0	ENSPTRT00000012280	277	4	5	1	9	0	0	0	0	0	0	0	ENSMMUT00000017387	484	0	6	1	TRUE	TRUE
ENSMMUT00000017387_376	ENSPTRT00000012280_169	ENST00000555019_174	chr14:93976618:-	117	0	4.81381	0	0	0	2.5455	1.60748	1.6559	ENST00000555019	174	5	5	2	117	0	9.86526	0	0	0	1.39567	2.23607	ENSPTRT00000012280	169	1	4	2	117	0	0	0	0	0	0	0	ENSMMUT00000017387	376	0	5	2	TRUE	TRUE
ENSMMUT00000017387_337	ENSPTRT00000012280_130	ENST00000555019_135	chr14:93976657:-	18	867.891	0	0	0	0	0	3.01547	2.44949	ENST00000555019	135	3	4	3	18	0	0	0	0	0	0	0	ENSPTRT00000012280	130	3	3	3	18	0	0	0	0	0	0	0	ENSMMUT00000017387	337	0	4	3	TRUE	TRUE
ENSMMUT00000017387_269	ENSPTRT00000012280_62	ENST00000555019_67	chr14:93976725:-	264	0.899341	3.99062	0	0	1.89472	1.42109	1.69442	1.09048	ENST00000555019	67	4	3	4	288	0	6.51342	0	0	0	0.91701	2.23607	ENSPTRT00000012280	62	2	2	4	264	0	0	0	0	0	0	0	ENSMMUT00000017387	269	0	3	4	TRUE	TRUE
ENSMMUT00000017387_210	ENSPTRT00000012280_3	ENST00000555019_8	chr14:93976784:-	126	0	0	0	0	199.21	2.5336	5.70225	2.41276	ENST00000555019	8	1	2	5	126	0	0	0	0	0	0	0	ENSPTRT00000012280	3	5	1	5	126	0	0	0	0	0	0	0	ENSMMUT00000017387	210	0	2	5	TRUE	TRUE
ENSMMUT00000039532_1734	ENSPTRT00000050784_957	ENST00000526495_289	chr14:95133462:-	4	0	0	0	0	0	0.427603	0.244442	2.44949	ENST00000526495	289	5	8	1	4	0	0	0	0	0	0	0	ENSPTRT00000050784	957	23	23	1	4	0	0	0	0	0	0	0	ENSMMUT00000039532	1734	16	30	1	TRUE	TRUE
ENSMMUT00000039532_1718	ENSPTRT00000050784_941	ENST00000526495_273	chr14:95133478:-	20	0	0	0	0	0	0.513261	0.316731	2.44949	ENST00000526495	273	4	7	2	20	0	0	3.92739	3.71433	0	0.89211	1.37019	ENSPTRT00000050784	941	3	22	2	20	0	0	0	0	0	0	0	ENSMMUT00000039532	1718	15	29	2	TRUE	TRUE
ENSMMUT00000039532_1713	ENSPTRT00000050784_936	ENST00000526495_268	chr14:95133483:-	9	0	0	0	0	0	0.183403	0.122742	2.44949	ENST00000526495	268	6	6	3	9	0	0	2.62266	0	0	0.458034	2.23607	ENSPTRT00000050784	936	5	21	3	9	2024.62	0	0	0	0	0.280273	2.23607	ENSMMUT00000039532	1713	5	28	3	TRUE	TRUE
ENSMMUT00000039532_1505	ENSPTRT00000050784_870	ENST00000526495_202	chr14:95140704:-	42	13.3923	0.449677	0	1827.25	0	4.10012	4.17292	2.42097	ENST00000526495	202	2	5	4	42	0	0	1.76588	0	0	0.41187	2.23607	ENSPTRT00000050784	870	7	20	4	42	4.52731	0	0	0	0	0.374771	2.23607	ENSMMUT00000039532	1505	4	26	5	TRUE	TRUE
ENSMMUT00000039532_1497	ENSPTRT00000050784_862	ENST00000526495_194	chr14:95140712:-	57	12.979	1.34562	0	3365.15	9.7934	4.10149	6.76832	2.42506	ENST00000526495	194	1	4	5	57	0	0	1.12443	2.16661	0	0.587352	1.47932	ENSPTRT00000050784	862	4	19	5	174	15.1006	0	0	12.2967	0	2.2587	1.38121	ENSMMUT00000039532	1497	2	25	6	TRUE	TRUE
ENSMMUT00000039532_1465	ENSPTRT00000050784_830	ENST00000526495_162	chr14:95140744:-	9	0	0	0	0	0	0.160482	0.118024	2.44949	ENST00000526495	162	7	3	6	9	0	0	0.450146	1.08408	0	0.254611	1.55195	ENSPTRT00000050784	830	8	18	6	9	4.72948	0	0	0	0	0.646588	2.23607	ENSMMUT00000039532	1465	3	24	7	TRUE	TRUE
ENSMMUT00000039532_1396	ENSPTRT00000050784_232	ENST00000526495_93	chr14:95141736:-	9	2601.67	0	0	1066.31	0	0	0.814214	1.74091	ENST00000526495	93	3	2	7	9	0	0	0	1.084	0	0.115258	2.23607	ENSPTRT00000050784	232	10	4	20	9	2.42512	0	4.74063	43.6049	0	6.23243	1.85176	ENSMMUT00000039532	1396	1	23	8	TRUE	TRUE
ENSMMUT00000026777_104	ENSPTRT00000001374_59	ENST00000262662_118	chr1:50967994:+	24	0	0	0	0	0	0	0	0	ENST00000262662	118	8	3	11	24	0	0	0	0	0	0	0	ENSPTRT00000001374	59	11	1	12	24	0	0	0	0	0	0	0	ENSMMUT00000026777	104	6	1	10	TRUE	TRUE
ENSMMUT00000026777_109	ENSPTRT00000001374_64	ENST00000262662_123	chr1:50967999:+	9	0	0	0	0	0	0	0	0	ENST00000262662	123	9	4	10	9	0	0	0	0	0	0	0	ENSPTRT00000001374	64	12	2	11	9	0	0	0	0	0	0	0	ENSMMUT00000026777	109	7	2	9	TRUE	TRUE
ENSMMUT00000026777_418	ENSPTRT00000001374_372	ENST00000262662_428	chr1:50968304:+	108	0	0	0	0	0	0	0	0	ENST00000262662	428	13	6	8	108	0	0	0	0	0	0	0	ENSPTRT00000001374	372	9	4	9	78	0	0	0	0	0	0	0	ENSMMUT00000026777	418	9	3	8	TRUE	TRUE
ENSMMUT00000026777_711	ENSPTRT00000001374_652	ENST00000262662_705	chr1:50968581:+	147	0	0	0	3.47443	0	0.517691	0.312117	2.0916	ENST00000262662	705	6	7	7	147	0	0	1.12326	0	0	0.234675	2.23607	ENSPTRT00000001374	652	6	6	7	36	0	0	0	0	0	0	0	ENSMMUT00000026777	711	10	4	7	TRUE	TRUE
ENSMMUT00000026777_859	ENSPTRT00000001374_800	ENST00000262662_853	chr1:50968729:+	60	1.49493	0	0	0.644644	0	0.558039	0.436959	1.31545	ENST00000262662	853	5	8	6	60	0	0	0	4.79552	0	0.585584	2.23607	ENSPTRT00000001374	800	5	7	6	59	0.18875	0.92511	0	0	0	0.189403	1.80021	ENSMMUT00000026777	859	3	5	6	TRUE	TRUE
ENSMMUT00000026777_918	ENSPTRT00000001374_859	ENST00000262662_912	chr1:50968788:+	543	2.30264	1.67348	0.877204	1.75409	4.02187	4.86223	2.55524	0.594185	ENST00000262662	912	4	9	5	543	1.51586	1.64113	0.768898	1.8711	3.87014	1.43385	0.599317	ENSPTRT00000001374	859	3	8	5	4	0.0520269	0	0	0	0	0.00771805	2.23607	ENSMMUT00000026777	918	5	6	5	TRUE	TRUE
ENSMMUT00000026777_1424	ENSPTRT00000001374_1360	ENST00000262662_1413	chr1:50969289:+	42	1.57094	5.46004	0	5.55529	13.7283	11.5345	4.03128	0.856307	ENST00000262662	1413	3	10	4	42	3.50013	0	1.68621	0	0	1.09258	1.50242	ENSPTRT00000001374	1360	4	9	4	3	0	0	0	0	0	0	0	ENSMMUT00000026777	1424	8	7	4	TRUE	TRUE
ENSMMUT00000026777_1503	ENSPTRT00000001374_1439	ENST00000262662_1493	chr1:50969369:+	39	4.33693	0.44961	0	7.94361	23.5612	12.173	8.28252	1.09893	ENST00000262662	1493	1	11	3	39	14.6898	41.9715	0.632869	16.2107	0	8.90714	1.15838	ENSPTRT00000001374	1439	1	10	3	39	3.36526	6.97962	5.31197	0	4.17338	4.62209	0.655402	ENSMMUT00000026777	1503	1	8	3	TRUE	TRUE
ENSMMUT00000026777_1608	ENSPTRT00000001374_1541	ENST00000262662_1595	chr1:50969471:+	141	4.73005	0.942452	2.7956	1.54767	9.81594	5.91107	4.24014	0.768209	ENST00000262662	1595	2	12	2	141	1.91537	8.00005	1.61502	1.08397	4.00819	3.08682	0.854176	ENSPTRT00000001374	1541	2	11	2	141	1.56838	2.94584	1.18554	2.18859	1.81358	2.07607	0.345409	ENSMMUT00000026777	1608	2	9	2	TRUE	TRUE
ENSMMUT00000026777_1961	ENSPTRT00000001374_1894	ENST00000262662_1948	chr1:50969824:+	84	0.217518	0	0	0.0549374	0	0.135326	0.10039	1.33127	ENST00000262662	1948	7	13	1	84	0	0.492621	0	0.131791	0	0.188583	1.70838	ENSPTRT00000001374	1894	7	12	1	84	0.0836802	0	0	0	0	0.0164331	2.23607	ENSMMUT00000026777	1961	4	10	1	TRUE	TRUE
ENSMMUT00000023180_733	ENSPTRT00000046964_164	ENST00000314742_113	chr15:100580897:-	55	0	0	0	0.885981	0	0.257861	0.131962	1.86697	ENST00000314742	113	1	2	1	55	0	1.76502	0.205669	0	0	0.578877	1.95745	ENSPTRT00000046964	164	1	3	1	24	0	0	0	0	0	0	0	ENSMMUT00000023180	733	6	6	1	TRUE	TRUE
ENSMMUT00000023180_642	ENSPTRT00000046964_77	ENST00000314742_26	chr15:100602159:-	12	0	0	0	0	0	0	0	0	ENST00000314742	26	2	1	2	12	0	0	0	0	0	0	0	ENSPTRT00000046964	77	3	2	2	12	3.63645	0	0	0	0	0.526977	2.23607	ENSMMUT00000023180	642	1	5	2	TRUE	TRUE
ENSMMUT00000018702_25	ENSPTRT00000102104_25	ENST00000388948_120	chr15:100924535:+	54	6.71583	3.77633	0	20.8536	1.57342	3.84593	3.50126	1.23476	ENST00000388948	120	1	1	2	54	0	2.22956	1665.59	0	0	1.78097	2.23233	ENSPTRT00000102104	25	1	1	2	42	0	1.96529	0	0	0	0.695049	2.23607	ENSMMUT00000018702	25	1	1	4	TRUE	TRUE
ENSMMUT00000018702_47	ENSPTRT00000102104_47	ENST00000388948_142	chr15:100924557:+	54	4.20228	0.950301	0	0	0	4.31161	2.23185	1.33657	ENST00000388948	142	2	2	1	54	0	2.00702	8.86938	0	0	0.961354	1.76607	ENSPTRT00000102104	47	2	2	1	54	0	0	0	0	0	0	0	ENSMMUT00000018702	47	4	4	1	TRUE	TRUE
ENSMMUT00000053926_450	ENSPTRT00000001379_459	ENST00000371733_25	chr1:51519242:-	11	1.57099	1.77688	1.30579	11.7907	66.8392	3.66417	5.1799	1.7908	ENST00000371733	25	2	2	1	11	5.71947	3.37644	1.77334	1.89019	0	2.35948	0.837476	ENSPTRT00000001379	459	1	3	1	11	5.13747	3.25762	0.0848469	1.34545	5.59905	3.05936	0.770348	ENSMMUT00000053926	450	2	3	1	TRUE	TRUE
ENSMMUT00000053926_447	ENSPTRT00000001379_456	ENST00000371733_22	chr1:51519245:-	14	1.57094	1.77685	7.83287	14.1438	66.8082	3.78618	5.90224	1.58527	ENST00000371733	22	1	1	2	14	5.3619	3.37635	1.77332	1.89016	0	2.32667	0.809018	ENSPTRT00000001379	456	2	2	2	14	6.16591	7.78749	2.62495	5.65026	9.16228	6.51258	0.392986	ENSMMUT00000053926	447	1	2	2	TRUE	TRUE
ENSMMUT00000005512_35	ENSPTRT00000090395_561	ENST00000337451_297	chr15:22839689:+	165	1.06702	1.74295	2.3452	2.54259	0.504354	1.34752	1.36967	0.487654	ENST00000337451	297	4	3	5	165	0	0.337578	0.352113	1.13094	0	0.413741	1.26898	ENSPTRT00000090395	561	6	5	13	165	1.25967	0.301141	0.166494	0.820543	0.520487	0.524948	0.713304	ENSMMUT00000005512	35	3	1	6	TRUE	TRUE
ENSMMUT00000005512_65	ENSPTRT00000090395_591	ENST00000337451_327	chr15:22839719:+	135	0.984454	1.78362	2.58785	2.62503	0.555906	1.37732	1.40676	0.510836	ENST00000337451	327	3	4	4	135	0	0.352578	0.359474	1.131	0	0.425504	1.25302	ENSPTRT00000090395	591	5	6	12	135	1.5447	0.304701	0.185508	0.909175	0.58024	0.580972	0.774615	ENSMMUT00000005512	65	1	2	5	TRUE	TRUE
ENSMMUT00000005512_135	ENSPTRT00000090395_661	ENST00000337451_397	chr15:22839789:+	18	0	2.48458	0	1.96684	0	0.641486	0.568082	1.30448	ENST00000337451	397	5	5	3	18	0	0.552093	0.648893	0.722867	0	0.594632	0.926339	ENSPTRT00000090395	661	4	7	11	18	2.85826	0.807395	0.573744	0	0	0.577994	1.39003	ENSMMUT00000005512	135	2	3	4	TRUE	TRUE
ENSMMUT00000005512_234	ENSPTRT00000090395_767	ENST00000337451_503	chr15:22845250:+	24	0.127106	0	0.580431	1.94746	0.0520104	0.676974	0.379532	1.30247	ENST00000337451	503	6	6	2	42	0	0	0	0	0	0	0	ENSPTRT00000090395	767	13	8	10	24	0.15831	0	0	0	0	0.0245222	2.23607	ENSMMUT00000005512	234	5	4	3	TRUE	TRUE
ENSMMUT00000005512_309	ENSPTRT00000090395_1137	ENST00000337451_578	chr15:22851696:+	6	0.172693	0	0	0.186495	0.123128	0.233249	0.127235	0.82863	ENST00000337451	578	7	7	1	6	0	0.0429802	0.508779	0	1.01277	0.340467	1.42642	ENSPTRT00000090395	1137	7	17	1	6	0.344319	0.433641	0.107838	0	0.349259	0.293498	0.744118	ENSMMUT00000005512	309	4	6	1	TRUE	TRUE
ENSMMUT00000013159_243	ENSPTRT00000012654_167	ENST00000362065_167	chr15:30904539:+	68	1.22389	1.76572	0	2.44908	8.77808	0.821036	1.43356	1.26994	ENST00000362065	167	1	1	1	120	0	0	4.08654	0.362844	0	0.884712	2.01588	ENSPTRT00000012654	167	1	1	1	120	1.81833	1.54186	0	1.24753	0	0.859457	0.938779	ENSMMUT00000013159	243	2	4	1	TRUE	TRUE
ENSMMUT00000000012_140	ENSPTRT00000012690_142	ENST00000256544_136	chr15:34209961:-	25	0	0	4.07906	0.843309	0	0.27034	0.583291	1.85804	ENST00000256544	136	2	2	1	25	0	1.6223	0.282502	0	0	0.592625	1.84961	ENSPTRT00000012690	142	2	2	1	75	2.04435	3.41267	0	2.76763	0	1.547	0.959126	ENSMMUT00000000012	140	2	2	5	TRUE	TRUE
ENSMMUT00000000012_25	ENSPTRT00000012690_44	ENST00000256544_38	chr15:34210059:-	45	0.224955	0	0	1.37694	1.25281	0.540407	0.610847	1.08567	ENST00000256544	38	1	1	2	45	0.875579	1.09885	1.96727	1.69203	6.25753	1.93355	0.930373	ENSPTRT00000012690	44	1	1	2	27	0	1.84658	3.72391	0	3.56026	1.92513	0.997726	ENSMMUT00000000012	25	1	1	6	TRUE	TRUE
ENSMMUT00000009565_642	ENSPTRT00000012726_652	ENST00000561208_651	chr15:37099899:-	48	0	0	0	0	0	10.1177	11.2106	2.44949	ENST00000561208	651	1	4	1	48	0	0	0	0	0	0	0	ENSPTRT00000012726	652	4	4	1	48	0	0	0	0	0	0	0	ENSMMUT00000009565	642	0	5	1	TRUE	TRUE
ENSMMUT00000009565_619	ENSPTRT00000012726_629	ENST00000561208_628	chr15:37099922:-	51	0	0	0	0	0	15.1551	5.93389	2.44949	ENST00000561208	628	2	3	2	51	0	0	0	0	0	0	0	ENSPTRT00000012726	629	3	3	2	51	0	0	0	0	0	0	0	ENSMMUT00000009565	619	0	4	2	TRUE	TRUE
ENSMMUT00000009565_88	ENSPTRT00000012726_93	ENST00000561208_92	chr15:37100458:-	114	0	0	0	0	0	0	0	0	ENST00000561208	92	4	2	3	114	0	0	460.953	0	0	4.97712	2.23607	ENSPTRT00000012726	93	1	2	3	114	0	0	0	0	0	0	0	ENSMMUT00000009565	88	0	2	4	TRUE	TRUE
ENSMMUT00000009565_63	ENSPTRT00000012726_68	ENST00000561208_67	chr15:37100483:-	105	0	7.81607	0	0	0	1.27784	2.22384	2.06419	ENST00000561208	67	3	1	4	105	0	0	393.368	0	0	3.29065	2.23607	ENSPTRT00000012726	68	2	1	4	105	0	0	0	0	0	0	0	ENSMMUT00000009565	63	0	1	5	TRUE	TRUE
ENSMMUT00000014969_357	ENSPTRT00000012732_1035	ENST00000299084_221	chr15:38253056:+	123	0	0	0	0	0	1.2798	0.242114	2.44949	ENST00000299084	221	1	1	1	123	0	0	0.562816	1.18198	3.59023	0.590344	1.39884	ENSPTRT00000012732	1035	5	5	1	123	0	0	0	0	0	0	0	ENSMMUT00000014969	357	0	1	1	TRUE	TRUE
ENSMMUT00000072961_105	ENSPTRT00000012752_105	ENST00000260402_67	chr15:40307869:-	69	0	0	4.33856	1.7611	5.85483	0.801917	1.08505	1.14684	ENST00000260402	67	2	2	2	69	0	0	4.42748	3.24347	13.04	4.29369	1.29094	ENSPTRT00000012752	105	1	2	2	69	0	0	0	0	6.88807	2.59155	2.23607	ENSMMUT00000072961	105	1	2	1	TRUE	TRUE
ENSMMUT00000072961_62	ENSPTRT00000012752_62	ENST00000260402_24	chr15:40307912:-	102	0	1.07678	36.5479	1.75655	26.741	2.16759	3.57325	1.40716	ENST00000260402	24	1	1	3	102	0	0	4.39452	3.23923	8.69794	4.27763	1.10506	ENSPTRT00000012752	62	2	1	3	102	0	0	0	0	6.86985	2.07329	2.23607	ENSMMUT00000072961	62	2	1	2	TRUE	TRUE
ENSMMUT00000056482_316	ENSPTRT00000012799_317	ENST00000260361_351	chr15:41402146:-	48	0.585778	1.05352	1.23517	0.944494	0.656753	0.659786	0.763269	0.305487	ENST00000260361	351	1	1	1	48	0	0	0.515743	0.848557	0	0.265782	1.43561	ENSPTRT00000012799	317	1	1	1	48	0.107802	0	0	1.12119	1.38294	0.612693	1.29012	ENSMMUT00000056482	316	1	2	1	TRUE	TRUE
ENSMMUT00000011431_61	ENSPTRT00000012806_336	ENST00000304330_42	chr15:41537199:-	74	0.827126	1.11401	0	7.02829	0	0.205989	0.739428	1.78685	ENST00000304330	42	2	2	1	74	0	2.29197	0.494011	0.556254	7.36858	1.43912	1.4228	ENSPTRT00000012806	336	1	3	1	74	0.291797	0	0	0	0.530328	0.157947	1.46221	ENSMMUT00000011431	61	2	2	1	TRUE	TRUE
ENSMMUT00000014196_2	ENSPTRT00000012813_129	ENST00000219905_116	chr15:41668829:+	18	0	0	0	1066.31	1388.47	436.242	3.54562	1.26656	ENST00000219905	116	2	2	2	18	0	0	0	0	3337.54	1.17669	2.23607	ENSPTRT00000012813	129	2	2	2	18	0	0	0	0	0	0	0	ENSMMUT00000014196	2	2	1	2	TRUE	TRUE
ENSMMUT00000014196_22	ENSPTRT00000012813_149	ENST00000219905_136	chr15:41668849:+	9	0	0	0	0	0	0	0	0	ENST00000219905	136	3	3	1	9	0	0	0	0	0	0	0	ENSPTRT00000012813	149	3	3	1	9	2024.62	0	0	0	0	0.203878	2.23607	ENSMMUT00000014196	22	1	2	1	TRUE	TRUE
ENSMMUT00000061421_1983	ENSPTRT00000088515_1971	ENST00000456763_41	chr15:41774564:+	105	3567.64	0.406142	9.7369	8.44213	102.961	5.58257	13.608	2.3492	ENST00000456763	41	1	1	1	105	5.59906	2.33023	5.11104	3.79023	4.99681	4.04436	0.301932	ENSPTRT00000088515	1971	1	32	1	105	6.17106	4.68389	9.1967	6.62594	2.38592	5.6173	0.432308	ENSMMUT00000061421	1983	1	34	1	TRUE	TRUE
ENSMMUT00000020364_34	ENSPTRT00000089634_29	ENST00000389834_234	chr15:42273430:-	30	0.816337	0	0	0.88556	15.6155	0.684271	0.858637	2.06407	ENST00000389834	234	1	3	1	30	0	0	0.715901	0.145141	0	0.215981	1.80225	ENSPTRT00000089634	29	1	1	1	30	0.808993	3.18974	2.87759	6.72057	9.14137	4.24821	0.732896	ENSMMUT00000020364	34	1	1	1	TRUE	TRUE
ENSMMUT00000062958_501	ENSPTRT00000012900_52	ENST00000562188_473	chr15:43334989:+	24	0	0	0	0	0	2.05054	0.437048	2.44949	ENST00000562188	473	3	5	1	24	0	0	0	2.52752	0	0.493729	2.23607	ENSPTRT00000012900	52	1	1	1	24	0	0	0	0	0	0	0	ENSMMUT00000062958	501	6	5	2	TRUE	TRUE
ENSMMUT00000066284_597	ENSPTRT00000094891_875	ENST00000396976_81	chr15:43369968:-	6	0	0	0	0	0	0	0	0	ENST00000396976	81	2	2	1	6	0	0	0	0	0	0	0	ENSPTRT00000094891	875	10	10	1	6	0	0	0	0	7.41583	0.710489	2.23607	ENSMMUT00000066284	597	5	9	1	TRUE	TRUE
ENSMMUT00000066284_585	ENSPTRT00000094891_863	ENST00000396976_69	chr15:43369980:-	12	1.99476	2.48483	0	4794.91	19.6217	0.256816	2.23779	2.43465	ENST00000396976	69	1	1	2	12	0	2.06004	0.613557	2.04046	0	1.0704	1.10472	ENSPTRT00000094891	863	3	9	2	12	1.21295	0	0	8.10108	0	2.48556	1.89318	ENSMMUT00000066284	585	1	8	2	TRUE	TRUE
ENSMMUT00000032038_397	ENSPTRT00000012927_43	ENST00000406925_3879	chr15:43800020:+	15	0	0	0	0	0	0	0	0	ENST00000406925	3879	48	58	3	15	0	0	0	0	0	0	0	ENSPTRT00000012927	43	0	1	3	15	0	0	0	0	0	0	0	ENSMMUT00000032038	397	0	4	4	TRUE	TRUE
ENSMMUT00000032038_408	ENSPTRT00000012927_54	ENST00000406925_3890	chr15:43800031:+	105	0	0	0	0	1.76975	0	0.886976	2.44949	ENST00000406925	3890	2	59	2	105	0	0	0	0	0	0	0	ENSPTRT00000012927	54	0	2	2	105	0	0	0	0	0	0	0	ENSMMUT00000032038	408	0	5	3	TRUE	TRUE
ENSMMUT00000032038_486	ENSPTRT00000012927_132	ENST00000406925_3968	chr15:43800109:+	27	0	0	0	0	2.95106	0	1.82843	2.44949	ENST00000406925	3968	1	60	1	27	0	0	0	0	0	0	0	ENSPTRT00000012927	132	0	3	1	27	0	0	0	0	0	0	0	ENSMMUT00000032038	486	0	6	2	TRUE	TRUE
ENSMMUT00000023521_56	ENSPTRT00000101145_417	ENST00000260327_23	chr15:44427651:+	15	0	1.5441	0	3.53458	0	0.213931	0.61063	1.62352	ENST00000260327	23	1	1	2	15	0	0	0	0.464725	0	0.113483	2.23607	ENSPTRT00000101145	417	2	2	2	15	0.505625	0	0	0	1.62549	0.417822	1.65466	ENSMMUT00000023521	56	1	1	2	TRUE	TRUE
ENSMMUT00000023521_184	ENSPTRT00000101145_545	ENST00000260327_151	chr15:44458997:+	15	0	0	0	1918.56	0	0.405192	0.193046	2.44887	ENST00000260327	151	2	2	1	15	0	0	0	0.333666	0.156107	0.0737921	1.51186	ENSPTRT00000101145	545	3	3	1	15	0.341306	0	0.513824	0	0.607235	0.296832	0.969393	ENSMMUT00000023521	184	2	2	1	TRUE	TRUE
ENSMMUT00000020058_1332	ENSPTRT00000075168_807	ENST00000434130_46	chr15:44676543:-	53	0	0	0	0.590935	0	0.513892	0.250832	1.55483	ENST00000434130	46	1	1	1	53	0	0.386607	0.0905487	2.16559	0	0.303146	1.75725	ENSPTRT00000075168	807	1	19	1	57	3.62466	0	0	5.87534	0	1.20725	1.43192	ENSMMUT00000020058	1332	1	29	7	TRUE	TRUE
ENSMMUT00000029386_274	ENSPTRT00000079598_942	ENST00000559390_584	chr15:44736360:+	21	0	0	0	0	1.47613	2.55455	1.01742	1.63025	ENST00000559390	584	4	4	7	21	0	0	0	0	0	0	0	ENSPTRT00000079598	942	0	13	6	21	0	0	0	0	0	0	0	ENSMMUT00000029386	274	9	6	7	TRUE	TRUE
ENSMMUT00000029386_284	ENSPTRT00000079598_952	ENST00000559390_594	chr15:44736370:+	36	0	0	0	0	0.844204	1.28096	0.719435	1.59752	ENST00000559390	594	5	5	6	36	0	0	0	0	0	0	0	ENSPTRT00000079598	952	0	14	5	30	0	0	0	0	0	0	0	ENSMMUT00000029386	284	10	7	6	TRUE	TRUE
ENSMMUT00000029386_320	ENSPTRT00000079598_988	ENST00000559390_630	chr15:44736406:+	54	0	0	0	0	0	0	0	0	ENST00000559390	630	10	6	5	54	0	0	0	0	0	0	0	ENSPTRT00000079598	988	0	15	4	54	0	0	0	0	0	0	0	ENSMMUT00000029386	320	11	8	5	TRUE	TRUE
ENSMMUT00000029386_373	ENSPTRT00000079598_1041	ENST00000559390_683	chr15:44736459:+	48	0	0	0	0.885907	0	0	0.156749	2.44949	ENST00000559390	683	9	7	4	48	0	0	0	0	0	0	0	ENSPTRT00000079598	1041	0	16	3	108	225.847	0	0	0	0	1.474	2.23607	ENSMMUT00000029386	373	3	9	4	TRUE	TRUE
ENSMMUT00000029386_403	ENSPTRT00000079598_1071	ENST00000559390_713	chr15:44736489:+	18	0	0	0	1.18014	0	0	0.162273	2.44949	ENST00000559390	713	8	9	2	18	0	0	0	0	0	0	0	ENSPTRT00000079598	1071	0	17	2	78	312.327	0	0	0	0	1.47881	2.23607	ENSMMUT00000029386	403	1	11	2	TRUE	TRUE
ENSMMUT00000029386_499	ENSPTRT00000079598_1168	ENST00000559390_810	chr15:44736586:+	9	0.748231	4.03775	0	3.79391	0.492395	1.35007	1.65797	1.00433	ENST00000559390	810	2	10	1	9	0	0	0	0	0	0	0	ENSPTRT00000079598	1168	0	18	1	9	0	0	0	0	0	0	0	ENSMMUT00000029386	499	12	12	1	TRUE	TRUE
ENSMMUT00000016119_138	ENSPTRT00000012989_219	ENST00000261867_151	chr15:45522467:-	48	813.71	0	0	0	9.71417	1959.59	32.0573	1.7278	ENST00000261867	151	1	2	1	48	0	0	0	0	2503.4	417.061	2.23607	ENSPTRT00000012989	219	1	2	1	48	633.382	0	1560.02	0	0	5.60732	1.55973	ENSMMUT00000016119	138	1	2	1	TRUE	TRUE
ENSMMUT00000013738_815	ENSPTRT00000013009_3028	ENST00000332408_870	chr15:48963050:-	35	0	0	0	0	0	0	0	0	ENST00000332408	870	8	8	1	35	0	0	0	0	0	0	0	ENSPTRT00000013009	3028	0	37	1	35	0	0	0	0	0	0	0	ENSMMUT00000013738	815	0	7	1	TRUE	TRUE
ENSMMUT00000013738_776	ENSPTRT00000013009_2989	ENST00000332408_831	chr15:48963089:-	74	0	0	0	0	0	0	0	0	ENST00000332408	831	7	7	2	74	0	0	0	0	0	0	0	ENSPTRT00000013009	2989	0	36	2	74	0	0	0	0	0	0	0	ENSMMUT00000013738	776	0	6	2	TRUE	TRUE
ENSMMUT00000013738_491	ENSPTRT00000013009_2704	ENST00000332408_547	chr15:48963373:-	90	0	0	0	0	0	175.097	5.31342	2.44949	ENST00000332408	547	1	5	4	60	0	0	0	0	0	0	0	ENSPTRT00000013009	2704	0	34	4	60	0	0	0	0	0	0	0	ENSMMUT00000013738	491	0	5	3	TRUE	TRUE
ENSMMUT00000013738_324	ENSPTRT00000013009_2537	ENST00000332408_380	chr15:48963540:-	24	0	0	0	0	0	0	0	0	ENST00000332408	380	5	4	5	24	0	0	0	0	0	0	0	ENSPTRT00000013009	2537	0	33	5	24	0	0	0	0	0	0	0	ENSMMUT00000013738	324	0	4	4	TRUE	TRUE
ENSMMUT00000013738_223	ENSPTRT00000013009_2435	ENST00000332408_281	chr15:48963639:-	99	0	0	0	0	0	0	0	0	ENST00000332408	281	4	3	6	102	0	0	0	0	0	0	0	ENSPTRT00000013009	2435	0	32	6	105	0	0	0	0	0	0	0	ENSMMUT00000013738	223	0	3	5	TRUE	TRUE
ENSMMUT00000013738_174	ENSPTRT00000013009_2384	ENST00000332408_230	chr15:48963690:-	24	0	0	0	0	0	0	0	0	ENST00000332408	230	3	2	7	24	0	0	0	0	0	0	0	ENSPTRT00000013009	2384	0	31	7	24	0	0	0	0	0	0	0	ENSMMUT00000013738	174	0	2	6	TRUE	TRUE
ENSMMUT00000013738_58	ENSPTRT00000013009_2268	ENST00000332408_114	chr15:48963806:-	12	0	0	0	0	0	0	0	0	ENST00000332408	114	2	1	8	12	0	0	0	0	0	0	0	ENSPTRT00000013009	2268	0	30	8	12	0	0	0	0	0	0	0	ENSMMUT00000013738	58	0	1	7	TRUE	TRUE
ENSMMUT00000040607_118	ENSPTRT00000058496_194	ENST00000559471_82	chr15:49046365:-	39	27.9057	0.712944	43.3235	5.29693	11.6839	7.68505	7.31154	1.01075	ENST00000559471	82	1	1	1	39	0	9.47626	1.12452	3.36929	49.3399	5.10359	1.64492	ENSPTRT00000058496	194	1	2	1	39	0.979913	2.05413	4.59041	0	0	1.41424	1.25395	ENSMMUT00000040607	118	1	1	1	TRUE	TRUE
ENSMMUT00000024516_95	ENSPTRT00000105688_90	ENST00000249700_101	chr15:51751697:+	24	1.42807	0	0	5.29338	0	1.28225	1.3222	1.53732	ENST00000249700	101	2	1	4	60	0	0	0.227707	2.14453	0	0.249088	1.97872	ENSPTRT00000105688	90	6	1	12	24	1.5918	0	0	0	0	0.653379	2.23607	ENSMMUT00000024516	95	3	1	3	TRUE	TRUE
ENSMMUT00000024516_144	ENSPTRT00000105688_381	ENST00000249700_150	chr15:51766406:+	30	1.68193	0	0	10.5718	0	0.7333	1.76475	1.92736	ENST00000249700	150	1	2	3	30	0	0	0	0	0	0	0	ENSPTRT00000105688	381	10	10	3	30	7.22325	0	0	0	0	0.747211	2.23607	ENSMMUT00000024516	144	2	2	2	TRUE	TRUE
ENSMMUT00000024516_157	ENSPTRT00000105688_394	ENST00000249700_163	chr15:51766419:+	23	0	0	0	5.29417	0	0.855262	0.848298	2.0678	ENST00000249700	163	4	4	1	23	0	0	0	0	0	0	0	ENSPTRT00000105688	394	12	12	1	23	7.23622	0	0	0	0	0.994553	2.23607	ENSMMUT00000024516	157	1	3	1	TRUE	TRUE
ENSMMUT00000008060_9	ENSPTRT00000001488_36	ENST00000294383_12	chr1:55215353:-	42	1672.86	0	0	229.281	446.971	8.92386	29.3123	1.65848	ENST00000294383	12	1	1	1	42	0	2.20508	1.12431	0	0	1.5238	1.48469	ENSPTRT00000001488	36	1	1	1	42	3.60679	21.2025	0	7.25982	12.8166	8.82083	0.92628	ENSMMUT00000008060	9	1	1	1	TRUE	TRUE
ENSMMUT00000011336_3373	ENSPTRT00000106814_1435	ENST00000508342_291	chr15:55916841:-	10	0	0	0	0	0	0	0	0	ENST00000508342	291	0	8	1	10	0	0	0	0	0	0	0	ENSPTRT00000106814	1435	0	30	1	10	0	0	0	0	0	0	0	ENSMMUT00000011336	3373	0	65	1	TRUE	TRUE
ENSMMUT00000011336_3363	ENSPTRT00000106814_1425	ENST00000508342_281	chr15:55916851:-	20	0	0	0	0	0	0	0	0	ENST00000508342	281	0	7	2	20	0	0	0	0	0	0	0	ENSPTRT00000106814	1425	0	29	2	20	0	0	0	0	0	0	0	ENSMMUT00000011336	3363	0	64	2	TRUE	TRUE
ENSMMUT00000011336_3344	ENSPTRT00000106814_1406	ENST00000508342_262	chr15:55916870:-	18	0	0	0	0	0	0	0	0	ENST00000508342	262	0	6	3	18	0	0	0	0	0	0	0	ENSPTRT00000106814	1406	0	28	3	18	0	0	0	0	0	0	0	ENSMMUT00000011336	3344	0	63	3	TRUE	TRUE
ENSMMUT00000011336_3297	ENSPTRT00000106814_1359	ENST00000508342_215	chr15:55916917:-	21	0	0	0	0	0	0	0	0	ENST00000508342	215	0	5	4	21	0	0	0	0	0	0	0	ENSPTRT00000106814	1359	0	27	4	21	0	0	0	0	0	0	0	ENSMMUT00000011336	3297	0	62	4	TRUE	TRUE
ENSMMUT00000011336_3281	ENSPTRT00000106814_1343	ENST00000508342_199	chr15:55916933:-	81	0	0	0	0	0	0	0	0	ENST00000508342	199	0	4	5	81	0	0	0	0	0	0	0	ENSPTRT00000106814	1343	0	26	5	81	0	0	0	0	0	0	0	ENSMMUT00000011336	3281	0	61	5	TRUE	TRUE
ENSMMUT00000011336_3228	ENSPTRT00000106814_1290	ENST00000508342_146	chr15:55916986:-	18	0	0	0	0	0	0	0	0	ENST00000508342	146	0	3	6	18	0	0	0	0	0	0	0	ENSPTRT00000106814	1290	0	25	6	18	0	0	0	0	0	0	0	ENSMMUT00000011336	3228	0	60	6	TRUE	TRUE
ENSMMUT00000011336_3211	ENSPTRT00000106814_1273	ENST00000508342_129	chr15:55917003:-	18	0	0	0	0	0	0	0	0	ENST00000508342	129	0	2	7	18	0	0	0	0	0	0	0	ENSPTRT00000106814	1273	0	24	7	18	0	0	0	0	0	0	0	ENSMMUT00000011336	3211	0	59	7	TRUE	TRUE
ENSMMUT00000011336_3190	ENSPTRT00000106814_1252	ENST00000508342_108	chr15:55917024:-	39	0	0	0	0	0	0	0	0	ENST00000508342	108	0	1	8	39	0	0	0	0	0	0	0	ENSPTRT00000106814	1252	0	23	8	39	0	0	0	0	0	0	0	ENSMMUT00000011336	3190	0	58	8	TRUE	TRUE
ENSMMUT00000024610_256	ENSPTRT00000013135_386	ENST00000260408_120	chr15:58749588:-	15	7.47711	2.10686	0	4475.32	6.87836	2.33144	3.55956	2.4372	ENST00000260408	120	1	1	1	15	0	11.0038	1.24946	1.83434	0	2.91366	1.64874	ENSPTRT00000013135	386	1	2	1	15	0.505625	0	1.99385	2.80283	2.57227	1.55769	0.796972	ENSMMUT00000024610	256	1	1	1	TRUE	TRUE
ENSMMUT00000023010_1	ENSPTRT00000013151_362	ENST00000288228_98	chr15:59458550:+	6	0	0	0	0	0	0	0	0	ENST00000288228	98	3	2	2	6	0	0	0	0	0	0	0	ENSPTRT00000013151	362	0	7	2	6	0	0	0	0	0	0	0	ENSMMUT00000023010	1	0	1	2	TRUE	TRUE
ENSMMUT00000023010_22	ENSPTRT00000013151_383	ENST00000288228_119	chr15:59458571:+	9	0	0	0	0	0	0	0	0	ENST00000288228	119	2	3	1	56	0	0	0	0	0	0	0	ENSPTRT00000013151	383	0	8	1	56	0	0	0	0	0	0	0	ENSMMUT00000023010	22	0	2	1	TRUE	TRUE
ENSMMUT00000054148_475	ENSPTRT00000013154_439	ENST00000396061_364	chr15:59652319:-	12	1.39311	9.80706	1.45093	3.24633	4.92268	5.46755	4.1228	0.719721	ENST00000396061	364	1	2	1	12	0	0.842912	1.24729	2.69548	0.0494881	1.13089	1.13967	ENSPTRT00000013154	439	1	2	1	12	0.688605	0.618527	1.11974	0	1.09366	0.762308	0.646105	ENSMMUT00000054148	475	2	3	1	TRUE	TRUE
ENSMMUT00000030007_117	ENSPTRT00000097879_88	ENST00000261520_136	chr15:60479007:-	4	0	0	0	0	0	0	0	0	ENST00000261520	136	3	3	1	57	0	0	0.606084	0	0	0.126461	2.23607	ENSPTRT00000097879	88	3	2	4	84	1.66675	0	1.77788	0	0.636359	0.655448	1.06334	ENSMMUT00000030007	117	6	3	14	TRUE	TRUE
ENSMMUT00000030007_51	ENSPTRT00000097879_22	ENST00000261520_70	chr15:60479073:-	6	0	0.577017	40752.4	0	0	0.733001	1.77209	2.4494	ENST00000261520	70	2	2	2	6	0	0	0	0	0	0	0	ENSPTRT00000097879	22	5	1	5	6	0	0	0	0	0	0	0	ENSMMUT00000030007	51	15	2	15	TRUE	TRUE
ENSMMUT00000029715_298	ENSPTRT00000101805_367	ENST00000607537_286	chr15:64300624:-	33	0	1.15377	0	1744.24	7.46957	1.02608	2.4259	2.43334	ENST00000607537	286	2	2	1	33	0	0	4.49157	1.53559	0	0.857649	1.6207	ENSPTRT00000101805	367	2	3	1	33	0.280517	0	0	0	0	0.0426405	2.23607	ENSMMUT00000029715	298	3	3	1	TRUE	TRUE
ENSMMUT00000029715_260	ENSPTRT00000101805_329	ENST00000607537_248	chr15:64300662:-	48	0	1.26179	10.4132	38.2964	6.22268	0.986647	3.04827	1.536	ENST00000607537	248	1	1	2	48	0	0	1.54537	0.993788	0	0.516923	1.42213	ENSPTRT00000101805	329	3	2	2	30	0.992627	0	0	1.52874	0	0.615912	1.41996	ENSMMUT00000029715	260	2	2	2	TRUE	TRUE
ENSMMUT00000018634_124	ENSPTRT00000013220_128	ENST00000300069_103	chr15:64775487:-	6	0	0.577017	0	0	0	7.69134	1.52593	2.2506	ENST00000300069	103	1	1	1	6	0	0	0	0	0	0	0	ENSPTRT00000013220	128	0	1	1	6	1.81966	1.59564	1.33377	5.41842	0	1.94564	0.993311	ENSMMUT00000018634	124	1	1	1	TRUE	TRUE
ENSMMUT00000058032_1459	ENSPTRT00000013259_1499	ENST00000261892_184	chr15:65623983:+	98	0	0	0	0	0	0	0	0	ENST00000261892	184	0	3	2	98	0	0	0	0	0	0	0	ENSPTRT00000013259	1499	19	21	2	95	0	0	0	0	0	0	0	ENSMMUT00000058032	1459	12	20	2	TRUE	TRUE
ENSMMUT00000058032_1517	ENSPTRT00000013259_1560	ENST00000261892_245	chr15:65624044:+	18	0	0	0	0	0	0	0	0	ENST00000261892	245	0	4	1	18	0	0	0	0	0	0	0	ENSPTRT00000013259	1560	20	22	1	18	0	0	0	0	0	0	0	ENSMMUT00000058032	1517	13	21	1	TRUE	TRUE
ENSMMUT00000032938_95	ENSPTRT00000081500_374	ENST00000635620_94	chr15:65756457:-	7	73.996	13.1771	24.7992	60267.3	180.771	5.12953	24.9878	2.43504	ENST00000635620	94	1	3	1	7	0	0.0910295	1.71364	16.7944	7.81077	2.19218	1.36033	ENSPTRT00000081500	374	2	5	1	7	34.506	2.90101	0	0	3.339	2.75703	1.81822	ENSMMUT00000032938	95	1	3	1	TRUE	TRUE
ENSMMUT00000032938_80	ENSPTRT00000081500_359	ENST00000635620_79	chr15:65756472:-	6	0	0	0	1598.97	17.6914	0.570147	1.07731	2.41644	ENST00000635620	79	3	2	2	6	0	0	0	1.8066	0	0.176213	2.23607	ENSPTRT00000081500	359	5	4	2	6	0	0	0	0	0	0	0	ENSMMUT00000032938	80	3	2	2	TRUE	TRUE
ENSMMUT00000032938_76	ENSPTRT00000081500_355	ENST00000635620_75	chr15:65761363:-	26	39.2078	8.62112	13.7704	20651.7	72.6652	3.33382	15.0848	2.43005	ENST00000635620	75	2	1	3	26	0.614465	0.0485579	1.44081	6.00094	6.07221	1.47233	1.04536	ENSPTRT00000081500	355	3	3	3	26	39.7338	1.59553	0	0	1.78073	1.64571	2.01955	ENSMMUT00000032938	76	2	1	3	TRUE	TRUE
ENSMMUT00000023661_16	ENSPTRT00000013277_70	ENST00000316634_17	chr15:66497746:-	6	1.96376	0	0	0	0	0	0.395825	2.44949	ENST00000316634	17	1	1	1	6	0	0	0	0	0	0	0	ENSPTRT00000013277	70	2	2	1	6	0	0	0	0	0	0	0	ENSMMUT00000023661	16	0	1	1	TRUE	TRUE
ENSMMUT00000024538_590	ENSPTRT00000013289_457	ENST00000341509_113	chr15:66565385:-	20	0	0	0	0	0	0	0	0	ENST00000341509	113	0	1	1	20	0	0	0	0	0	0	0	ENSPTRT00000013289	457	4	4	1	24	0	0	0	0	0	0	0	ENSMMUT00000024538	590	0	5	10	TRUE	TRUE
ENSMMUT00000069786_711	ENSPTRT00000013308_696	ENST00000178640_612	chr15:67543314:+	6	1.6831	5.76876	0	7.08052	16.7235	10.8974	6.01332	0.874013	ENST00000178640	612	1	1	1	6	0	4.32547	0.346128	0	0	0.867344	2.03531	ENSPTRT00000013308	696	2	2	1	6	0.909922	0	9.48123	0	0	0.928236	2.00032	ENSMMUT00000069786	711	2	3	1	TRUE	TRUE
ENSMMUT00000011622_43	ENSPTRT00000106051_873	ENST00000306917_568	chr15:68278312:+	106	0.898432	1.49509	50.282	1.756	1296.84	3.18757	3.74167	2.32603	ENST00000306917	568	2	2	1	106	3.10417	1.85125	7.7647	2.06315	1.10454	2.06929	0.83776	ENSPTRT00000106051	873	2	3	1	106	1.58999	0	0	10.0525	0	2.15469	1.87778	ENSMMUT00000011622	43	1	1	1	TRUE	TRUE
ENSMMUT00000040392_213	ENSPTRT00000013352_213	ENST00000560369_30	chr15:70892655:+	18	0	0	0	0	0	0	0	0	ENST00000560369	30	4	1	4	18	0	0	0	0	0	0	0	ENSPTRT00000013352	213	0	2	4	18	0	0	0	0	0	0	0	ENSMMUT00000040392	213	0	4	5	TRUE	TRUE
ENSMMUT00000040392_327	ENSPTRT00000013352_327	ENST00000560369_144	chr15:70892769:+	45	2081.54	0	0	0	0	0	400.25	2.44949	ENST00000560369	144	2	2	3	45	0	0	0	0	0	0	0	ENSPTRT00000013352	327	0	3	3	45	0	0	0	0	0	0	0	ENSMMUT00000040392	327	0	6	3	TRUE	TRUE
ENSMMUT00000040392_339	ENSPTRT00000013352_339	ENST00000560369_156	chr15:70892781:+	33	2838.1	0	0	0	0	0	545.432	2.44949	ENST00000560369	156	1	3	2	33	0	0	0	0	0	0	0	ENSPTRT00000013352	339	0	4	2	33	0	0	0	0	0	0	0	ENSMMUT00000040392	339	0	7	2	TRUE	TRUE
ENSMMUT00000040392_368	ENSPTRT00000013352_368	ENST00000560369_185	chr15:70892810:+	24	0	0	0	0	0	0	0	0	ENST00000560369	185	3	4	1	24	0	0	0	0	0	0	0	ENSPTRT00000013352	368	0	5	1	24	0	0	0	0	0	0	0	ENSMMUT00000040392	368	0	8	1	TRUE	TRUE
ENSMMUT00000055444_1389	ENSPTRT00000067394_647	ENST00000569795_568	chr15:72267531:-	30	0.961965	0	0	0	1.05022	0.641486	0.542285	1.1378	ENST00000569795	568	1	2	1	30	2.22801	1.09075	0	1.12744	1.4177	0.90698	0.681833	ENSPTRT00000067394	647	1	2	1	30	0.505748	0	0	0	0	0.0986383	2.23607	ENSMMUT00000055444	1389	2	10	1	TRUE	TRUE
ENSMMUT00000055444_1354	ENSPTRT00000067394_612	ENST00000569795_533	chr15:72267566:-	54	0	0	0	0	0.875326	0.549979	0.317107	1.6086	ENST00000569795	533	2	1	2	54	1.32495	0.843026	0	0.333896	1.88954	0.601863	0.86171	ENSPTRT00000067394	612	2	1	2	54	0.866676	0	0	0	0	0.137455	2.23607	ENSMMUT00000055444	1354	1	9	2	TRUE	TRUE
ENSMMUT00000040354_255	ENSPTRT00000013447_566	ENST00000220003_596	chr15:74782652:+	24	12.1953	3.23073	14.3877	12.1967	8.77541	8.14775	9.03599	0.405863	ENST00000220003	596	1	1	3	24	26.6326	15.248	31.7583	3.6054	11.0582	15.5498	0.649447	ENSPTRT00000013447	566	1	1	3	24	1.7691	6.3851	4.1386	5.00036	6.55791	5.57919	0.409489	ENSMMUT00000040354	255	1	1	3	TRUE	TRUE
ENSMMUT00000040354_278	ENSPTRT00000013447_589	ENST00000220003_619	chr15:74782675:+	84	0.595226	0.549801	1.36222	2.26398	1.00209	1.44345	0.992317	0.531741	ENST00000220003	619	2	2	2	84	1.44731	0.964701	2.26444	1.2235	1.81813	1.4977	0.33062	ENSPTRT00000013447	589	2	2	2	84	0.684586	0.537599	0.652795	1.57566	0.681991	0.810216	0.511847	ENSMMUT00000040354	278	2	2	2	TRUE	TRUE
ENSMMUT00000040354_329	ENSPTRT00000013447_640	ENST00000220003_670	chr15:74798238:+	33	0.545306	0.401986	0.406423	0.792935	0.437658	0.769587	0.529667	0.321931	ENST00000220003	670	3	3	1	33	0.510277	0.00774437	0.451416	1.54348	0.966035	0.660446	0.837771	ENSPTRT00000013447	640	3	3	1	33	0.333741	0.573199	1.00228	0.749377	0.636144	0.716748	0.371484	ENSMMUT00000040354	329	3	3	1	TRUE	TRUE
ENSMMUT00000012974_256	ENSPTRT00000043733_923	ENST00000394947_305	chr15:75430386:-	11	2.24374	0	0	10.0284	0	1.92376	1.34444	1.64475	ENST00000394947	305	1	1	1	11	0.152409	0	0.899714	1.53041	0	0.603475	1.31346	ENSPTRT00000043733	923	1	6	1	11	2.22376	1.25151	0	0	1.16157	0.871849	1.01737	ENSMMUT00000012974	256	1	1	1	TRUE	TRUE
ENSMMUT00000010387_515	ENSPTRT00000013511_391	ENST00000381714_112	chr15:77420785:+	42	0	1.15379	0	2.35407	3.37132	0.997595	1.09877	1.01589	ENST00000381714	112	1	1	3	42	0	0	0	10.3804	5.56299	1.38031	1.4698	ENSPTRT00000013511	391	2	4	2	42	0	0	0	0	0	0	0	ENSMMUT00000010387	515	3	3	1	TRUE	TRUE
ENSMMUT00000067702_34	ENSPTRT00000013529_275	ENST00000258930_284	chr15:78131261:-	46	0	0	0	0	0	511.936	2.2598	2.44949	ENST00000258930	284	1	1	1	46	0	0	489.522	0	0	1.09785	2.23607	ENSPTRT00000013529	275	1	1	1	46	0.606653	2.10322	0.780831	0.286804	4.48931	1.64126	1.04625	ENSMMUT00000067702	34	1	1	1	TRUE	TRUE
ENSMMUT00000068169_188	ENSPTRT00000013538_144	ENST00000258886_110	chr15:78438325:+	13	73.7973	6.53752	66.8461	31.8448	19692.4	5.12902	15.4663	2.42227	ENST00000258886	110	1	1	1	13	7.00188	5.04678	14.2914	7.83671	4.38647	7.66671	0.510339	ENSPTRT00000013538	144	1	1	1	13	16.9641	0	2.03228	0	1.16616	1.80708	1.80521	ENSMMUT00000068169	188	1	1	1	TRUE	TRUE
ENSMMUT00000026888_90	ENSPTRT00000108474_429	ENST00000334574_90	chr15:82805980:-	12	0	0	0	0	0	0	0	0	ENST00000334574	90	0	2	1	12	0	0	0	0	0	0	0	ENSPTRT00000108474	429	0	8	1	12	0	0	0	0	0	0	0	ENSMMUT00000026888	90	0	2	1	TRUE	TRUE
ENSMMUT00000026888_1	ENSPTRT00000108474_340	ENST00000334574_1	chr15:82806069:-	33	0	0	0	0	0	0	0	0	ENST00000334574	1	0	1	2	33	0	0	0	0	0	0	0	ENSPTRT00000108474	340	0	7	2	33	0	0	0	0	0	0	0	ENSMMUT00000026888	1	0	1	2	TRUE	TRUE
ENSMMUT00000004948_1566	ENSPTRT00000058655_1482	ENST00000286760_11	chr15:82809638:+	69	17.1015	5.23957	15.8025	1112.63	1358.3	30.1249	12.7128	1.49812	ENST00000286760	11	1	1	1	69	16.7714	15.7573	13.4098	2.70018	0	11.7921	0.80213	ENSPTRT00000058655	1482	1	14	1	69	1.81141	10.9259	16.3636	7.95018	16.2274	10.6958	0.573228	ENSMMUT00000004948	1566	1	16	1	TRUE	TRUE
ENSMMUT00000072861_258	ENSPTRT00000013618_291	ENST00000299633_81	chr15:83207743:-	27	867.891	0	12291.1	1066.31	1850.96	0	1830.9	1.77673	ENST00000299633	81	1	1	1	27	0	0	0	0	1731.06	288.647	2.23607	ENSPTRT00000013618	291	1	2	1	27	0	5282.01	0	0	5.91818	26.3761	2.23294	ENSMMUT00000072861	258	1	2	1	TRUE	TRUE
ENSMMUT00000014597_3495	ENSPTRT00000091822_303	ENST00000560079_95	chr15:84764728:+	75	0	0	0	2.34862	1.6385	0.789702	0.467477	1.25874	ENST00000560079	95	1	1	1	75	0	0	0.501081	0.602865	0	0.263017	1.37897	ENSPTRT00000091822	303	1	1	1	75	1.99954	0	0	0	0	0.383115	2.23607	ENSMMUT00000014597	3495	1	60	9	TRUE	TRUE
ENSMMUT00000027886_93	ENSPTRT00000013651_97	ENST00000394553_211	chr15:84982066:+	51	39.8318	3.22265	0	188.996	0	20.3603	11.7923	1.75042	ENST00000394553	211	1	3	1	51	0	0	17.7376	6.40944	0	8.53856	1.60087	ENSPTRT00000013651	97	1	1	1	51	0	42.0067	0	36.4179	17.571	19.4303	1.02747	ENSMMUT00000027886	93	1	1	1	TRUE	TRUE
ENSMMUT00000015599_118	ENSPTRT00000013702_99	ENST00000310775_77	chr15:89247638:+	10	1.18825	0.766844	3.59067	1.04164	3.06251	0.22312	0.941719	0.822576	ENST00000310775	77	1	1	1	10	0	0	0.18147	0.921515	0	0.18151	1.81157	ENSPTRT00000013702	99	1	1	1	10	0	0	0	0	0	0	0	ENSMMUT00000015599	118	0	1	1	TRUE	TRUE
ENSMMUT00000006585_94	ENSPTRT00000013760_874	ENST00000618099_266	chr15:90875626:+	66	1.94407	1.94891	0	22.7553	27.0273	3.58575	2.96147	1.25935	ENST00000618099	266	1	3	1	66	1.60498	0.984621	0.890356	0.54239	0	1.01971	0.734483	ENSPTRT00000013760	874	1	4	1	66	1.37104	0.804907	0.584308	0.774611	0.969318	0.927168	0.328883	ENSMMUT00000006585	94	1	1	1	TRUE	TRUE
ENSMMUT00000068000_163	ENSPTRT00000093624_324	ENST00000357742_317	chr15:94298258:+	8	11.1992	1.34615	0	0	0	0.3667	1.15774	2.07377	ENST00000357742	317	1	6	1	8	0	0	0	2.50151	0	1.71596	2.23607	ENSPTRT00000093624	324	1	2	1	8	2.12266	0	0	1.84195	0.114329	0.711517	1.31224	ENSMMUT00000068000	163	1	1	1	TRUE	TRUE
ENSMMUT00000040151_137	ENSPTRT00000013811_954	ENST00000394132_828	chr15:99228726:-	14	0	0	0	0	0	0.427977	0.146515	2.44949	ENST00000394132	828	9	11	1	14	0	0	0	0	0	0	0	ENSPTRT00000013811	954	0	18	1	14	0	0	0	0	0	0	0	ENSMMUT00000040151	137	2	2	2	TRUE	TRUE
ENSMMUT00000007359_85	ENSPTRT00000013814_333	ENST00000301981_64	chr15:99255900:+	15	1.74539	0.865452	0	2.12434	1.96856	1.64886	1.22792	0.581324	ENST00000301981	64	1	1	1	15	2.62585	0	0.198675	3.34983	7.28626	1.59336	1.0989	ENSPTRT00000013814	333	1	4	2	15	0.779987	0	0	0	0	0.126323	2.23607	ENSMMUT00000007359	85	2	1	2	TRUE	TRUE
ENSMMUT00000008269_88	ENSPTRT00000097859_1211	ENST00000396560_221	chr16:10430614:+	7	0	0	0	0	0	5.12104	0.555567	2.44949	ENST00000396560	221	1	1	1	7	0	0	0	0	0	0	0	ENSPTRT00000097859	1211	2	20	1	7	0	0	0	0	0	0	0	ENSMMUT00000008269	88	0	1	1	TRUE	TRUE
ENSMMUT00000015732_66	ENSPTRT00000014316_1075	ENST00000396516_185	chr16:11782368:-	14	2.24424	1.83566	0	0.644096	8.03839	0.680604	1.89124	1.32073	ENST00000396516	185	3	5	1	14	0	0.169655	1.62441	0.950137	0.736598	0.646251	0.933591	ENSPTRT00000014316	1075	1	18	1	14	2.42607	0	1.26461	2.70926	2.44874	1.63602	0.641882	ENSMMUT00000015732	66	1	1	1	TRUE	TRUE
ENSMMUT00000011547_168	ENSPTRT00000014345_234	ENST00000261658_38	chr16:14632988:+	36	0.516292	0.388384	0	2.21317	0.964101	0.882454	0.723099	0.923012	ENST00000261658	38	4	1	5	36	0	0.710286	0.617086	0.679799	2.58026	0.807226	1.06181	ENSPTRT00000014345	234	3	3	5	36	0.67863	0.709243	0.790459	1.0794	0.263129	0.683411	0.416117	ENSMMUT00000011547	168	2	2	5	TRUE	TRUE
ENSMMUT00000011547_196	ENSPTRT00000014345_262	ENST00000261658_66	chr16:14633016:+	76	0.136223	0.401726	0	1.08968	1.17353	0.411334	0.521892	0.912579	ENST00000261658	66	5	2	4	76	1.00448	0	0.109656	0.544905	0.469204	0.307006	0.93399	ENSPTRT00000014345	262	7	4	4	63	0.277828	0	0.592935	0	0	0.130637	1.51137	ENSMMUT00000011547	196	6	3	4	TRUE	TRUE
ENSMMUT00000011547_203	ENSPTRT00000014345_269	ENST00000261658_73	chr16:14644278:+	66	0.236521	0.660945	0	1.77008	1.76523	0.405207	0.753864	0.961475	ENST00000261658	73	3	3	3	66	1.64003	0	0.193544	0.838699	0	0.388153	1.32383	ENSPTRT00000014345	269	6	5	3	66	0	0	0.852234	0	0	0.133815	2.23607	ENSMMUT00000011547	203	4	4	3	TRUE	TRUE
ENSMMUT00000011547_206	ENSPTRT00000014345_272	ENST00000261658_76	chr16:14644281:+	63	0.240731	0.667004	0	1.77011	1.76524	0.410601	0.768895	0.956647	ENST00000261658	76	2	4	2	63	1.64004	0	0.199774	0.854823	0	0.391877	1.31473	ENSPTRT00000014345	272	5	6	2	63	0	0	0.852231	0	0	0.133801	2.23607	ENSMMUT00000011547	206	5	5	2	TRUE	TRUE
ENSMMUT00000011547_242	ENSPTRT00000014345_308	ENST00000261658_112	chr16:14644317:+	27	0.0900639	1.25333	0	2.52863	2.82473	0.910272	1.20442	0.942286	ENST00000261658	112	1	5	1	27	1.66334	0	0.562472	1.17701	0	0.493082	1.07791	ENSPTRT00000014345	308	4	7	1	27	0	0	1.18558	0	0	0.191851	2.23607	ENSMMUT00000011547	242	3	6	1	TRUE	TRUE
ENSMMUT00000025335_199	ENSPTRT00000014372_200	ENST00000396368_188	chr16:15639241:-	8	4.48505	0	0	1.18036	3903.25	2.56422	2.66919	2.44331	ENST00000396368	188	4	5	1	8	0	0	0	0	0	0	0	ENSPTRT00000014372	200	0	5	1	8	7.2642	0	0	0	0	0.248979	2.23607	ENSMMUT00000025335	199	2	5	1	TRUE	TRUE
ENSMMUT00000025335_182	ENSPTRT00000014372_183	ENST00000396368_171	chr16:15639258:-	25	12.3043	2.8823	0	2.35689	1749.21	2.56204	5.19454	2.41613	ENST00000396368	171	2	4	2	25	0	0	0	0	0	0	0	ENSPTRT00000014372	183	0	4	2	25	12.6513	0	0	0	0	0.327059	2.23607	ENSMMUT00000025335	182	1	4	2	TRUE	TRUE
ENSMMUT00000025335_174	ENSPTRT00000014372_175	ENST00000396368_163	chr16:15639266:-	15	1.12213	5.04279	0	0	833.48	0	1.82978	2.42795	ENST00000396368	163	5	3	3	15	0	0	0	0	0	0	0	ENSPTRT00000014372	175	0	3	3	15	1.36444	0	0	0	0	0.121451	2.23607	ENSMMUT00000025335	174	4	3	3	TRUE	TRUE
ENSMMUT00000025335_158	ENSPTRT00000014372_159	ENST00000396368_147	chr16:15639282:-	49	6.1543	5.54299	0	3.52636	1912.31	1.46479	5.35491	2.42407	ENST00000396368	147	1	2	4	49	0	0	0	0	0	0	0	ENSPTRT00000014372	159	0	2	4	49	2.54319	0	0	0	0	0.205815	2.23607	ENSMMUT00000025335	158	3	2	4	TRUE	TRUE
ENSMMUT00000025335_119	ENSPTRT00000014372_120	ENST00000396368_108	chr16:15643047:-	6	0	0	0	0	0	3918.18	3.04411	2.44949	ENST00000396368	108	3	1	5	6	0	0	0	0	0	0	0	ENSPTRT00000014372	120	0	1	5	6	0	0	0	0	0	0	0	ENSMMUT00000025335	119	5	1	5	TRUE	TRUE
ENSMMUT00000039499_105	ENSPTRT00000014440_103	ENST00000381396_105	chr16:19523961:+	63	41.9047	0.311883	17.2838	20.7891	27.0514	6.82729	7.81788	0.777023	ENST00000381396	105	1	1	1	63	0	6.03077	1.96717	3.20316	4.03948	3.1879	0.740209	ENSPTRT00000014440	103	1	1	1	63	0	0	0	0	0	0	0	ENSMMUT00000039499	105	0	1	1	TRUE	TRUE
ENSMMUT00000023524_86	ENSPTRT00000014464_369	ENST00000289416_31	chr16:20764044:+	6	0	0	0	0	0	1.09936	0.179753	2.44949	ENST00000289416	31	2	1	2	6	0	0	0	0	0	0	0	ENSPTRT00000014464	369	2	2	2	6	0	0	0	0	0	0	0	ENSMMUT00000023524	86	0	1	2	TRUE	TRUE
ENSMMUT00000023524_168	ENSPTRT00000014464_451	ENST00000289416_113	chr16:20769984:+	27	0	0	0	8.81504	0	0.769776	0.428965	2.2218	ENST00000289416	113	1	2	1	27	0	0	0	0	0	0	0	ENSPTRT00000014464	451	3	3	1	27	0	0	0	0	0	0	0	ENSMMUT00000023524	168	0	2	1	TRUE	TRUE
ENSMMUT00000027006_19	ENSPTRT00000014086_62	ENST00000326181_32	chr16:2155813:+	69	4.3002	0.65	1.0882	6.60148	6.55902	2.19835	2.59837	0.744269	ENST00000326181	32	1	1	2	69	4.72217	3.18747	3.10057	0.518997	3.19447	2.79956	0.514706	ENSPTRT00000014086	62	1	1	2	69	0.839973	1.75581	1.17212	1.24453	4.94601	1.85137	0.845388	ENSMMUT00000027006	19	1	1	3	TRUE	TRUE
ENSMMUT00000019470_133	ENSPTRT00000046626_133	ENST00000358154_37	chr16:21599613:+	96	3.77623	0	8.68744	23.7046	6.96536	6.40097	4.66308	0.987291	ENST00000358154	37	1	1	2	96	6.46063	3.72226	5.90877	1.34198	0.973837	3.42557	0.685704	ENSPTRT00000046626	133	1	2	2	96	1.77002	5.81899	2.39944	4.8078	6.23842	4.24829	0.479728	ENSMMUT00000019470	133	1	2	2	TRUE	TRUE
ENSMMUT00000019470_151	ENSPTRT00000046626_151	ENST00000358154_55	chr16:21599631:+	78	3.61293	0	6.0842	21.9839	6.07533	6.03745	4.15736	1.03813	ENST00000358154	55	2	2	1	78	4.93605	3.41422	5.84425	1.23885	0.973835	3.13226	0.661031	ENSPTRT00000046626	151	2	3	1	78	1.81927	5.24488	2.16833	4.80824	4.00099	3.70148	0.428141	ENSMMUT00000019470	151	2	3	1	TRUE	TRUE
ENSMMUT00000027006_88	ENSPTRT00000014086_131	ENST00000326181_101	chr16:2163906:+	12	0	0	2.2443	0	0	0.307938	0.344761	2.11476	ENST00000326181	101	2	2	1	12	0	0	0	0	0	0	0	ENSPTRT00000014086	131	2	2	1	12	0	0	1.01625	0	0	0.179106	2.23607	ENSMMUT00000027006	88	3	3	1	TRUE	TRUE
ENSMMUT00000014644_544	ENSPTRT00000014580_146	ENST00000328086_457	chr16:25257389:-	114	0	0	0	0	22.8452	0.516657	2.07536	2.38507	ENST00000328086	457	1	1	1	114	0	0	0.192047	3.23042	0	0.613789	2.08277	ENSPTRT00000014580	146	1	1	1	114	0	0	0	0	0	0	0	ENSMMUT00000014644	544	3	3	1	TRUE	TRUE
ENSMMUT00000000560_4	ENSPTRT00000001543_212	ENST00000317868_186	chr1:62803762:+	25	4.73547	0.311149	3.85705	24.7474	0	0.897876	2.89667	1.65066	ENST00000317868	186	2	2	1	25	4.79057	0	1.29321	1.8789	1.44666	1.51163	0.940792	ENSPTRT00000001543	212	2	2	1	69	0	0	1.25514	1.95013	0	0.649515	1.42194	ENSMMUT00000000560	4	1	1	3	TRUE	TRUE
ENSMMUT00000026182_198	ENSPTRT00000014604_587	ENST00000304658_425	chr16:28211445:-	9	6.10938	0.215429	0	2.36032	3.27987	1.82261	1.69784	0.979642	ENST00000304658	425	4	4	1	9	0.76877	0	1.17947	0.921515	1.12529	0.702316	0.595489	ENSPTRT00000014604	587	4	5	1	9	0.72794	1.11529	1.02754	0	0.935289	0.851661	0.590124	ENSMMUT00000026182	198	4	4	1	TRUE	TRUE
ENSMMUT00000026182_165	ENSPTRT00000014604_554	ENST00000304658_392	chr16:28211478:-	42	5.78548	0.179636	3.80697	1.76931	2.4567	1.80708	1.72778	0.736008	ENST00000304658	392	3	3	2	42	0.716434	0	1.12459	0.857265	1.04768	0.64906	0.598439	ENSPTRT00000014604	554	5	4	2	42	0.823298	1.06381	1.82768	0	0.99554	1.02528	0.692741	ENSMMUT00000026182	165	3	3	2	TRUE	TRUE
ENSMMUT00000026182_91	ENSPTRT00000014604_480	ENST00000304658_318	chr16:28211552:-	33	18.3166	1.02945	4.60635	47.5281	27.0091	1.98565	5.97159	1.09056	ENST00000304658	318	2	2	3	33	10.8142	3.94724	5.45929	0.11465	15.4809	4.84185	0.84179	ENSPTRT00000014604	480	2	3	3	33	0.682819	5.07413	11.2447	2.76174	5.19312	4.62425	0.793127	ENSMMUT00000026182	91	2	2	3	TRUE	TRUE
ENSMMUT00000026182_68	ENSPTRT00000014604_457	ENST00000304658_295	chr16:28211575:-	27	25.4169	1.21154	23.3031	255.994	54.5319	6.3599	13.4497	1.59111	ENST00000304658	295	1	1	4	27	70.9466	50.1765	45.1127	9.53501	407.852	45.8173	1.40706	ENSPTRT00000014604	457	1	2	4	27	11.3528	25.68	11.2481	12.8771	16.0185	16.5394	0.391459	ENSMMUT00000026182	68	1	1	4	TRUE	TRUE
ENSMMUT00000013520_18	ENSPTRT00000014699_9	ENST00000160827_10	chr16:29790729:+	31	0	0	0	310.285	0	0	0.0818547	2.44949	ENST00000160827	10	1	1	1	31	0	0	0	0	0	0	0	ENSPTRT00000014699	9	0	1	1	31	0	0	0	0	0	0	0	ENSMMUT00000013520	18	0	1	1	TRUE	TRUE
ENSMMUT00000013518_103	ENSPTRT00000097839_99	ENST00000567659_1	chr16:29812191:+	54	0	0	0	0	0	0	0	0	ENST00000567659	1	0	1	1	202	0	0	0	0	0	0	0	ENSPTRT00000097839	99	0	1	1	54	0	0	0	0	0	0	0	ENSMMUT00000013518	103	0	1	1	TRUE	TRUE
ENSMMUT00000062657_48	ENSPTRT00000014718_54	ENST00000568000_38	chr16:29926189:-	30	19.0008	0	0	6.18345	3.60613	5.12373	3.87269	1.24303	ENST00000568000	38	1	1	1	30	0	0	0	0	0	0	0	ENSPTRT00000014718	54	0	1	1	30	0.910104	3.18803	0	0	0	0.696589	1.68538	ENSMMUT00000062657	48	1	1	1	TRUE	TRUE
ENSMMUT00000011697_300	ENSPTRT00000083419_756	ENST00000319296_240	chr16:30407536:+	72	1.49295	0	243.568	0	0	0	1.80776	2.43163	ENST00000319296	240	2	1	2	72	0	0	0	0	0	0	0	ENSPTRT00000083419	756	0	12	2	151	0	0.170311	0	0.427449	0	0.109327	1.56629	ENSMMUT00000011697	300	1	1	2	TRUE	TRUE
ENSMMUT00000011697_312	ENSPTRT00000083419_768	ENST00000319296_252	chr16:30407548:+	60	1.49351	0	292.082	0	0	0	1.81161	2.43457	ENST00000319296	252	1	2	1	60	0	0	0	0	0	0	0	ENSPTRT00000083419	768	0	13	1	139	0	0.169988	0	0.426901	0	0.108818	1.56651	ENSMMUT00000011697	312	2	2	1	TRUE	TRUE
ENSMMUT00000007910_519	ENSPTRT00000045768_516	ENST00000356166_192	chr16:30658622:+	150	10.1489	2.08256	13.8812	136.149	46.543	6.08205	10.955	1.44244	ENST00000356166	192	2	1	3	150	1.84707	3.78864	2.996	3.38404	4.97206	3.32738	0.335504	ENSPTRT00000045768	516	2	2	3	156	4.84084	2.65661	10.7131	5.29605	3.31173	5.70595	0.592755	ENSMMUT00000007910	519	2	2	3	TRUE	TRUE
ENSMMUT00000007910_611	ENSPTRT00000045768_612	ENST00000356166_288	chr16:30658718:+	54	4.48005	0.311709	2.79571	121.552	25.3921	4.61317	6.39252	1.78816	ENST00000356166	288	3	2	2	54	0	5.76987	1.85747	1.08405	0	2.36702	1.36848	ENSPTRT00000045768	612	3	3	2	54	0.849405	1.99366	10.07	1.38468	3.07227	3.8274	1.08771	ENSMMUT00000007910	611	3	3	2	TRUE	TRUE
ENSMMUT00000007910_1411	ENSPTRT00000045768_1390	ENST00000356166_1066	chr16:30659496:+	12	25357.6	0	45118.7	10.5823	6764.9	3918.18	138.728	1.33943	ENST00000356166	1066	1	3	1	12	0	4100.31	4370.55	0	0	44.9052	1.37047	ENSPTRT00000045768	1390	1	4	1	12	12.6966	6790.87	0	25171.3	0	24.0899	1.70445	ENSMMUT00000007910	1411	1	4	1	TRUE	TRUE
ENSMMUT00000029367_44	ENSPTRT00000097662_84	ENST00000324685_336	chr16:30762332:+	18	8.30098	4.03732	0	18.849	64.623	4.5581	7.2838	1.45412	ENST00000324685	336	2	2	1	18	5.09158	0	2.92298	0.722848	5.06018	2.13553	0.85987	ENSPTRT00000097662	84	1	1	1	18	0.260542	1.77263	0	0	0	0.485153	1.89827	ENSMMUT00000029367	44	1	1	1	TRUE	TRUE
ENSMMUT00000054924_69	ENSPTRT00000092224_227	ENST00000380310_155	chr16:30924729:+	4	0	0	0	0	0	0	0	0	ENST00000380310	155	0	2	1	4	0	0	0	0	0	0	0	ENSPTRT00000092224	227	0	2	1	64	0.456255	0	0	0	4.85121	1.31767	2.00445	ENSMMUT00000054924	69	1	1	3	TRUE	TRUE
ENSMMUT00000070328_131	ENSPTRT00000099697_222	ENST00000318663_131	chr16:30949198:+	63	8.9691	2.56841	23.5653	9.51984	10.4181	16.9942	11.1127	0.606945	ENST00000318663	131	1	1	1	63	37.7404	42.4314	130.017	5.62739	29.597	39.1691	0.96595	ENSPTRT00000099697	222	1	2	1	63	3.27279	5.70372	21.5307	14.3259	16.4951	11.7477	0.620775	ENSMMUT00000070328	131	1	1	1	TRUE	TRUE
ENSMMUT00000022541_77	ENSPTRT00000014817_182	ENST00000394951_447	chr16:31109047:+	60	7.85163	1.36681	1.90356	81.1608	5.38507	7.23153	7.27736	1.79085	ENST00000394951	447	2	8	1	60	3.17233	12.3068	3.5288	2.41731	5.65713	5.95908	0.744974	ENSPTRT00000014817	182	1	2	1	24	3.01069	2.97945	4.50103	3.58977	4.47426	3.89489	0.201966	ENSMMUT00000022541	77	1	1	2	TRUE	TRUE
ENSMMUT00000010577_1372	ENSPTRT00000014185_159	ENST00000396852_189	chr16:3397616:-	54	5.59349	1.51323	2.89769	3.52482	11.6342	2.19576	3.04541	0.819506	ENST00000396852	189	3	5	1	54	0	0	0	0	0	0	0	ENSPTRT00000014185	159	4	4	1	59	1.61639	0	0	0	0	0.239932	2.23607	ENSMMUT00000010577	1372	5	21	1	TRUE	TRUE
ENSMMUT00000010577_1360	ENSPTRT00000014185_148	ENST00000396852_178	chr16:3397627:-	70	4.10455	1.51286	2.1739	7.03123	3.91697	2.27696	2.82275	0.573999	ENST00000396852	178	4	4	2	70	0	0	215.019	0	5.38594	1.14385	2.16841	ENSPTRT00000014185	148	2	3	2	71	3.27081	0	0	2.07616	0	1.00309	1.42513	ENSMMUT00000010577	1360	4	20	2	TRUE	TRUE
ENSMMUT00000010577_1346	ENSPTRT00000014185_134	ENST00000396852_164	chr16:3397641:-	15	4.4853	0	0	1918.56	0	1.9228	2.13498	2.43971	ENST00000396852	164	5	3	3	15	0	0	4.49324	13.7103	16.1699	3.90838	1.11095	ENSPTRT00000014185	134	1	2	3	15	3.63566	2.56413	0	0	0	1.29534	1.40298	ENSMMUT00000010577	1346	3	19	3	TRUE	TRUE
ENSMMUT00000010585_280	ENSPTRT00000014187_469	ENST00000268655_350	chr16:3401564:+	75	6.96868	0	0	9.40547	1.72093	3.51947	2.86314	1.07158	ENST00000268655	350	1	1	4	75	9.0839	7.95403	18.7195	0	0	4.82214	1.08422	ENSPTRT00000014187	469	1	2	4	75	0	0	0	0	0	0	0	ENSMMUT00000010585	280	3	1	4	TRUE	TRUE
ENSMMUT00000010585_305	ENSPTRT00000014187_494	ENST00000268655_375	chr16:3401589:+	39	5.60272	0	0	3.53249	6.85625	1.02603	2.24656	1.04192	ENST00000268655	375	3	2	3	39	0	5.85906	0	0	0	1.33719	2.23607	ENSPTRT00000014187	494	3	3	3	39	0	0	0	0	0	0	0	ENSMMUT00000010585	305	4	2	3	TRUE	TRUE
ENSMMUT00000010585_466	ENSPTRT00000014187_655	ENST00000268655_536	chr16:3401750:+	36	4.48545	2.79418	0	0	3.6053	2.56156	2.54161	0.831246	ENST00000268655	536	2	3	2	36	0	2.86653	3.3611	3.60297	0	1.56821	0.922799	ENSPTRT00000014187	655	2	4	2	36	0	0	0	0	3.52189	0.727118	2.23607	ENSMMUT00000010585	466	1	3	2	TRUE	TRUE
ENSMMUT00000010585_665	ENSPTRT00000014187_854	ENST00000268655_735	chr16:3401949:+	18	0	0	0	21.1159	0	1.92325	0.563775	2.2132	ENST00000268655	735	4	4	1	18	0	0	0	0	0	0	0	ENSPTRT00000014187	854	5	5	1	18	0.682641	0	0	0	0	0.107088	2.23607	ENSMMUT00000010585	665	2	4	1	TRUE	TRUE
ENSMMUT00000028185_37	ENSPTRT00000059135_231	ENST00000371088_8	chr1:63523532:+	42	0	0	0	0	1.96496	1.28165	0.954136	1.59983	ENST00000371088	8	1	1	1	42	0	0	0	7.54143	0	0.583897	2.23607	ENSPTRT00000059135	231	1	1	1	42	0	0	0	0	0	0	0	ENSMMUT00000028185	37	17	1	20	TRUE	TRUE
ENSMMUT00000071525_44	ENSPTRT00000100346_29	ENST00000219478_34	chr16:4767185:-	93	0.898356	1.34234	0	6.98049	0	2.54951	1.44949	1.34372	ENST00000219478	34	1	2	1	93	0	2.05757	6.59159	0.312905	10.9994	2.29831	1.18202	ENSPTRT00000100346	29	1	2	1	93	0	0	0	0	0	0	0	ENSMMUT00000071525	44	0	2	1	TRUE	TRUE
ENSMMUT00000071525_18	ENSPTRT00000100346_3	ENST00000219478_8	chr16:4767211:-	261	0.349072	0.195965	0	3.49353	0	1.91416	0.681016	1.4342	ENST00000219478	8	2	1	2	261	0	1.78034	1.8687	0.132148	3.15858	1.49092	0.954722	ENSPTRT00000100346	3	2	1	2	261	0	0	0	0	0	0	0	ENSMMUT00000071525	18	0	1	2	TRUE	TRUE
ENSMMUT00000015923_436	ENSPTRT00000014926_398	ENST00000356721_406	chr16:48365496:-	19	0	0	0	0	0	0	0	0	ENST00000356721	406	4	4	1	19	0	0	0	0	0	0	0	ENSPTRT00000014926	398	4	4	2	19	0	0	0	0	0	0	0	ENSMMUT00000015923	436	0	5	1	TRUE	TRUE
ENSMMUT00000015923_331	ENSPTRT00000014926_294	ENST00000356721_302	chr16:48365600:-	18	0	0	0	0	0	0	0	0	ENST00000356721	302	3	3	2	18	0	0	0	0	0	0	0	ENSPTRT00000014926	294	3	3	3	124	0	0	0	0	0	0	0	ENSMMUT00000015923	331	0	4	2	TRUE	TRUE
ENSMMUT00000015923_280	ENSPTRT00000014926_243	ENST00000356721_251	chr16:48365651:-	51	0	0	0	0	0	0	0	0	ENST00000356721	251	2	2	3	51	0	0	0	0	0	0	0	ENSPTRT00000014926	243	2	2	4	51	0	0	0	0	0	0	0	ENSMMUT00000015923	280	0	3	3	TRUE	TRUE
ENSMMUT00000015923_233	ENSPTRT00000014926_196	ENST00000356721_204	chr16:48365698:-	78	501.129	0	0	0	0	0	1.51799	2.44949	ENST00000356721	204	1	1	4	78	0	0	5.51731	0	0	0.439385	2.23607	ENSPTRT00000014926	196	1	1	5	78	0	0	0	0	0	0	0	ENSMMUT00000015923	233	0	2	4	TRUE	TRUE
ENSMMUT00000028212_57	ENSPTRT00000014933_58	ENST00000299192_36	chr16:50066005:+	33	4.47806	0	0	2034.78	11.7039	10.162	11.5824	2.41196	ENST00000299192	36	1	1	1	33	0	3930.91	6.15986	0	0	14.5008	2.2317	ENSPTRT00000014933	58	1	1	1	33	3.62662	0	0	0	4.44816	1.43365	1.38107	ENSMMUT00000028212	57	1	1	1	TRUE	TRUE
ENSMMUT00000022909_692	ENSPTRT00000014955_332	ENST00000447540_60	chr16:53155940:+	27	0	0	0	8.81504	2.45842	1.46526	2.03226	1.6159	ENST00000447540	60	3	1	5	27	0	0	0	0.394742	0	0.142315	2.23607	ENSPTRT00000014955	332	2	10	5	27	0	0	0	0	0	0	0	ENSMMUT00000022909	692	0	11	5	TRUE	TRUE
ENSMMUT00000022909_697	ENSPTRT00000014955_337	ENST00000447540_65	chr16:53155945:+	51	0	0	64.0908	8.78073	5.39767	2.92711	4.69993	1.84697	ENST00000447540	65	1	2	4	51	0	0	0	0	0	0	0	ENSPTRT00000014955	337	9	11	4	51	0	0	0	0	0	0	0	ENSMMUT00000022909	697	0	12	4	TRUE	TRUE
ENSMMUT00000022909_718	ENSPTRT00000014955_358	ENST00000447540_86	chr16:53155966:+	30	0	0	64.5806	640.188	3.9292	2.13584	3.89053	2.16788	ENST00000447540	86	2	3	3	30	0	0	0	0	0	0	0	ENSPTRT00000014955	358	10	12	3	30	0	0	0	0	0	0	0	ENSMMUT00000022909	718	0	13	3	TRUE	TRUE
ENSMMUT00000022909_747	ENSPTRT00000014955_387	ENST00000447540_115	chr16:53155995:+	66	0	0	0	3.52927	0	0	0.547256	2.44949	ENST00000447540	115	5	4	2	66	0	0	0	0	0	0	0	ENSPTRT00000014955	387	11	13	2	66	0	0	0	0	0	0	0	ENSMMUT00000022909	747	0	14	2	TRUE	TRUE
ENSMMUT00000022909_760	ENSPTRT00000014955_400	ENST00000447540_128	chr16:53156008:+	12	0	0	0	2397.95	0	0	0.91594	2.44949	ENST00000447540	128	4	5	1	12	0	0	0	0	0	0	0	ENSPTRT00000014955	400	12	14	1	12	0	0	0	0	0	0	0	ENSMMUT00000022909	760	0	15	1	TRUE	TRUE
ENSMMUT00000062757_87	ENSPTRT00000104351_81	ENST00000262133_30	chr16:53434500:+	33	0	0	0	1163.16	29.2443	4.60963	3.87614	2.36705	ENST00000262133	30	1	1	1	33	95.752	2.05839	22.3865	0.167519	0	7.91857	1.70978	ENSPTRT00000104351	81	1	1	1	33	1.81177	8.729	4.50025	0	14.3063	5.05478	0.979265	ENSMMUT00000062757	87	1	1	1	TRUE	TRUE
ENSMMUT00000012102_583	ENSPTRT00000091441_553	ENST00000300245_180	chr16:53500298:-	15	0	0	0	0	7.21068	0	0.907561	2.44949	ENST00000300245	180	2	3	1	15	0	0	0	0.11436	0	0.0213243	2.23607	ENSPTRT00000091441	553	2	8	1	15	0	0	0	0	0	0	0	ENSMMUT00000012102	583	4	4	1	TRUE	TRUE
ENSMMUT00000012102_561	ENSPTRT00000091441_531	ENST00000300245_158	chr16:53500320:-	61	0	0.253455	0	0	3.60189	0	0.621635	2.26176	ENST00000300245	158	3	2	2	61	0	0	0.0634321	0.0951013	0	0.0315921	1.41411	ENSPTRT00000091441	531	1	7	2	61	0	0	0	0	0	0	0	ENSMMUT00000012102	561	3	3	2	TRUE	TRUE
ENSMMUT00000055167_925	ENSPTRT00000013875_937	ENST00000383018_124	chr16:53952:+	38	1.17743	2.35549	3.94396	2.29677	3.77341	5.32307	3.14894	0.471431	ENST00000383018	124	1	1	1	38	1.4007	1.40466	1.25235	3.94794	1.58236	1.71688	0.595013	ENSPTRT00000013875	937	3	8	1	38	1.011	1.38514	0.786839	1.88467	0.376386	1.09072	0.528798	ENSMMUT00000055167	925	2	8	1	TRUE	TRUE
ENSMMUT00000066920_41	ENSPTRT00000014988_61	ENST00000300291_23	chr16:56451310:-	21	12.7156	6.37473	11.8961	20.3259	12.5575	6.58935	9.46434	0.43534	ENST00000300291	23	1	1	1	21	4.98498	5.44967	5.92609	3.56998	2.72737	4.51004	0.295506	ENSPTRT00000014988	61	1	1	1	21	0.78504	1.19083	0.824799	1.26714	2.30303	1.30971	0.481682	ENSMMUT00000066920	41	1	1	1	TRUE	TRUE
ENSMMUT00000028623_251	ENSPTRT00000015028_1	ENST00000537866_814	chr16:57204599:+	60	13.4552	2.93528	8.29524	7.06641	14.7043	0.821018	6.65203	0.701501	ENST00000537866	814	2	9	2	60	0	1.25071	2.54373	2.80488	0	1.65528	1.01593	ENSPTRT00000015028	1	1	1	2	60	1.68893	0	5.37095	0	0	1.72535	1.65076	ENSMMUT00000028623	251	4	8	2	TRUE	TRUE
ENSMMUT00000028623_275	ENSPTRT00000015028_25	ENST00000537866_838	chr16:57204623:+	144	5.51062	17.0553	21.4918	22.6033	40.4138	15.3463	15.5274	0.565232	ENST00000537866	838	1	10	1	36	0	1.87566	2.75871	2.94091	0	1.64734	0.950812	ENSPTRT00000015028	25	2	2	1	36	0.364647	0	6.71473	0	0	1.89782	2.09507	ENSMMUT00000028623	275	3	9	1	TRUE	TRUE
ENSMMUT00000028680_158	ENSPTRT00000015042_580	ENST00000258214_130	chr16:57529267:-	48	1.12184	0	0	0.885907	0	1306.73	3.33485	2.44498	ENST00000258214	130	1	1	1	48	0	0	9.7049	5.14102	0	3.5735	1.4732	ENSPTRT00000015042	580	3	4	1	48	2.18037	15.5792	0	0	4.65769	4.1361	1.44828	ENSMMUT00000028680	158	1	1	1	TRUE	TRUE
ENSMMUT00000022028_372	ENSPTRT00000015060_93	ENST00000379661_26	chr16:57735795:+	72	2.88304	0	0	5.28393	1.77055	4.68845	1.91676	0.929965	ENST00000379661	26	4	1	5	72	0	0	0.843889	0	0	0.178766	2.23607	ENSPTRT00000015060	93	3	1	4	72	1.51558	0.185906	0	6.3582	0.841188	0.96464	1.47613	ENSMMUT00000022028	372	4	1	5	TRUE	TRUE
ENSMMUT00000022028_450	ENSPTRT00000015060_171	ENST00000379661_104	chr16:57736995:+	15	1.57093	4.32583	0	8.84315	10.6835	17.0753	5.72034	0.901926	ENST00000379661	104	1	2	4	15	4.57819	8.33703	7.25636	0.722911	2.39326	4.89312	0.686613	ENSPTRT00000015060	171	1	2	3	15	2.42534	2.57049	2.37096	2.32825	0.703137	2.0752	0.372613	ENSMMUT00000022028	450	2	2	4	TRUE	TRUE
ENSMMUT00000022028_491	ENSPTRT00000015060_212	ENST00000379661_145	chr16:57737036:+	4	0	0	0	0	0	0	0	0	ENST00000379661	145	5	4	2	36	0	0	0.355511	0	0	0.172423	2.23607	ENSPTRT00000015060	212	4	3	2	36	0.166255	0	0	0	0	0.0256755	2.23607	ENSMMUT00000022028	491	5	4	2	TRUE	TRUE
ENSMMUT00000022028_581	ENSPTRT00000015060_293	ENST00000379661_235	chr16:57737126:+	27	3.52432	0.673288	0	10.5298	2.16515	2.16979	2.1633	1.19925	ENST00000379661	235	3	5	1	27	2.39546	0	1.4055	2.16735	0	1.04625	0.963141	ENSPTRT00000015060	293	2	4	1	27	0.728361	2.41732	2.63363	8.40292	1.01199	2.78515	1.0245	ENSMMUT00000022028	581	1	5	1	TRUE	TRUE
ENSMMUT00000059501_571	ENSPTRT00000077968_684	ENST00000219281_102	chr16:58001474:+	10	15.0078	37.3957	47	49.0512	24.5338	16.7276	26.3339	0.4737	ENST00000219281	102	1	1	1	10	31.0766	22.0022	9.13679	8.98146	26.9452	17.8975	0.518093	ENSPTRT00000077968	684	1	4	1	10	11.3364	9.81898	7.15715	8.17897	4.56114	7.73575	0.315181	ENSMMUT00000059501	571	1	3	1	TRUE	TRUE
ENSMMUT00000020511_350	ENSPTRT00000015088_280	ENST00000317147_225	chr16:58599386:-	49	5.70732	1.44226	0.791555	26.8227	10.8118	3.02729	3.4246	1.21845	ENST00000317147	225	2	2	1	49	1.88557	5.68405	4.84524	1.21957	5.06199	3.66116	0.543813	ENSPTRT00000015088	280	1	2	1	49	6.30346	5.70756	3.81395	5.78882	4.13182	5.14365	0.214315	ENSMMUT00000020511	350	1	5	1	TRUE	TRUE
ENSMMUT00000020511_230	ENSPTRT00000015088_160	ENST00000317147_105	chr16:58599506:-	42	28.3207	1.52264	7.70696	2512.1	5947.29	2.47608	4.48775	1.71882	ENST00000317147	105	1	1	2	42	0	1.20179	0.860109	0.765367	3.14781	0.826099	0.984655	ENSPTRT00000015088	160	2	1	2	42	18.7674	2.18186	2.55309	5.37235	2.968	3.82818	1.10579	ENSMMUT00000020511	230	2	4	2	TRUE	TRUE
ENSMMUT00000029323_6	ENSPTRT00000047816_424	ENST00000424011_74	chr16:66604105:+	84	0	0	70.7283	115.141	223.986	0	11.0908	1.31644	ENST00000424011	74	1	2	3	93	0	0	0	68.4721	3.96734	0.789327	2.08636	ENSPTRT00000047816	424	4	6	3	258	0	0	0	0	0	0	0	ENSMMUT00000029323	6	0	1	3	TRUE	TRUE
ENSMMUT00000029323_105	ENSPTRT00000047816_519	ENST00000424011_171	chr16:66604202:+	234	2.23415	0	0	0.399281	0	34.4801	0.954568	2.24531	ENST00000424011	171	3	3	2	234	0	0	1.39877	0	0	0.918635	2.23607	ENSPTRT00000047816	519	2	7	2	159	0	0	0	0	0	0	0	ENSMMUT00000029323	105	0	2	2	TRUE	TRUE
ENSMMUT00000029323_247	ENSPTRT00000047816_661	ENST00000424011_313	chr16:66604344:+	45	1.34582	0	0	0.709288	0	0	0.764463	1.65691	ENST00000424011	313	4	4	1	45	0	0	5.56147	0	0	1.81882	2.23607	ENSPTRT00000047816	661	1	8	1	45	0	0	0	0	0	0	0	ENSMMUT00000029323	247	0	3	1	TRUE	TRUE
ENSMMUT00000028510_437	ENSPTRT00000060185_1088	ENST00000290881_909	chr16:67180629:-	6	0	0	0	0	3.93566	2.56217	0.61068	1.60027	ENST00000290881	909	3	9	1	6	0	0	0.723007	0	0	0.235521	2.23607	ENSPTRT00000060185	1088	2	4	1	6	0	0	0	0	0	0	0	ENSMMUT00000028510	437	6	6	1	TRUE	TRUE
ENSMMUT00000028510_303	ENSPTRT00000060185_952	ENST00000290881_681	chr16:67183360:-	66	1.23427	0.961629	0	0.187443	0.805773	0.298636	0.635403	0.840784	ENST00000290881	681	2	2	8	66	0	0	0.432979	0.659056	0	0.295855	1.41737	ENSPTRT00000060185	952	1	3	2	57	0	0	0	0	0	0	0	ENSMMUT00000028510	303	5	5	2	TRUE	TRUE
ENSMMUT00000028510_102	ENSPTRT00000060185_751	ENST00000290881_480	chr16:67183561:-	96	0	3.29704	0	1.17947	1.47571	0.733225	1.02967	1.10121	ENST00000290881	480	1	1	9	96	0	0	0.14624	0.1317	0	0.0873993	1.37243	ENSPTRT00000060185	751	3	2	3	96	0.456905	0	0	0	8.79921	0.747098	2.10082	ENSMMUT00000028510	102	2	1	6	TRUE	TRUE
ENSMMUT00000013687_66	ENSPTRT00000015185_643	ENST00000646076_260	chr16:67571149:+	39	1.38926	2.9666	0	5.65316	4.91102	2.56444	2.35897	0.726859	ENST00000646076	260	1	1	4	39	0.729759	0.494769	1.37429	4.33456	2.6473	1.74164	0.82948	ENSPTRT00000015185	643	1	2	2	39	3.14102	0	0	0	0	0.253432	2.23607	ENSMMUT00000013687	66	1	1	3	TRUE	TRUE
ENSMMUT00000013687_96	ENSPTRT00000015185_673	ENST00000646076_290	chr16:67571179:+	9	0	2.1154	0	6.19349	0.492665	1.14008	1.12612	1.42575	ENST00000646076	290	2	2	3	9	0	0	0.250029	3.81984	0	0.798653	2.06864	ENSPTRT00000015185	673	2	3	1	9	3.63842	0	0	0	0	0.186579	2.23607	ENSMMUT00000013687	96	2	2	2	TRUE	TRUE
ENSMMUT00000016862_90	ENSPTRT00000015201_244	ENST00000568396_46	chr16:67847256:+	48	1.68105	10.0176	13.0156	1.7674	2.61746	164.216	4.222	2.01246	ENST00000568396	46	1	1	4	48	0	2.31523	3.04833	0	7.67764	3.65356	1.2061	ENSPTRT00000015201	244	3	2	4	48	0	1380.19	0	0	0	6.34555	2.23607	ENSMMUT00000016862	90	1	4	3	TRUE	TRUE
ENSMMUT00000016862_252	ENSPTRT00000015201_406	ENST00000568396_208	chr16:67847418:+	99	0.564235	0	0	1.75696	0	0	0.297462	1.83044	ENST00000568396	208	3	3	2	68	2.00969	0.698807	0.553015	0.800245	0.94653	0.873214	0.580572	ENSPTRT00000015201	406	4	4	2	68	1.14669	0.419111	0	1.85842	0.28932	0.551342	1.01428	ENSMMUT00000016862	252	5	5	2	TRUE	TRUE
ENSMMUT00000016862_287	ENSPTRT00000015201_441	ENST00000568396_243	chr16:67847453:+	84	0	0	0	0	0	0	0	0	ENST00000568396	243	4	4	1	24	1.62718	0.460351	0.197904	0.410277	0.289417	0.468436	0.979784	ENSPTRT00000015201	441	5	5	1	24	1.45578	0.536626	0	2.43543	0.359165	0.680704	1.02931	ENSMMUT00000016862	287	4	6	1	TRUE	TRUE
ENSMMUT00000016668_38	ENSPTRT00000015206_88	ENST00000291041_70	chr16:67893323:+	119	9.44479	1.72934	3.2591	95.0316	7.50796	4.06718	5.66523	1.82335	ENST00000291041	70	2	2	2	119	3.93468	12.5493	3.16059	7.28555	2.38927	5.56518	0.712474	ENSPTRT00000015206	88	2	3	2	119	11.9032	4.89049	5.14869	8.398	7.64383	6.96677	0.37525	ENSMMUT00000016668	38	1	1	2	TRUE	TRUE
ENSMMUT00000016668_140	ENSPTRT00000015206_190	ENST00000291041_172	chr16:67908733:+	17	0	0	9.78476	0	2.62273	2.13665	1.77153	1.56471	ENST00000291041	172	3	3	1	17	4.66761	5.01928	0.45041	0	0	2.30077	1.27263	ENSPTRT00000015206	190	3	4	1	17	4.09062	0	1.4591	0	0	0.82886	1.6055	ENSMMUT00000016668	140	2	2	1	TRUE	TRUE
ENSMMUT00000039265_123	ENSPTRT00000096525_229	ENST00000346183_225	chr16:68085594:+	15	40.2323	0	0	1918.56	0	40.8481	14.0676	2.33107	ENST00000346183	225	1	1	1	15	4.37537	22.1129	5.33707	1.08406	0	6.53271	1.36142	ENSPTRT00000096525	229	1	1	1	122	7.05768	0	0	0	0	0.337746	2.23607	ENSMMUT00000039265	123	1	1	1	TRUE	TRUE
ENSMMUT00000023745_308	ENSPTRT00000013928_294	ENST00000397621_268	chr16:705534:-	37	0	0	0	0	0	0	0	0	ENST00000397621	268	0	3	1	37	0	0	0	0	0	0	0	ENSPTRT00000013928	294	0	3	1	37	0	0	0	0	0	0	0	ENSMMUT00000023745	308	0	3	1	TRUE	TRUE
ENSMMUT00000023745_277	ENSPTRT00000013928_262	ENST00000397621_236	chr16:705566:-	36	0	0	0	0	0	0	0	0	ENST00000397621	236	0	2	2	36	0	0	0	0	0	0	0	ENSPTRT00000013928	262	0	2	2	68	0	0	0	0	0	0	0	ENSMMUT00000023745	277	0	2	2	TRUE	TRUE
ENSMMUT00000023745_263	ENSPTRT00000013928_248	ENST00000397621_222	chr16:705580:-	18	0	0	0	0	0	0	0	0	ENST00000397621	222	0	1	3	18	0	0	0	0	0	0	0	ENSPTRT00000013928	248	0	1	3	18	0	0	0	0	0	0	0	ENSMMUT00000023745	263	0	1	3	TRUE	TRUE
ENSMMUT00000002207_274	ENSPTRT00000015410_94	ENST00000283882_73	chr16:75433431:-	15	9.39671	3.71942	13.597	4.53247	10.6292	3.74868	6.03158	0.550683	ENST00000283882	73	1	2	1	15	6.59895	4.51634	9.44302	1.36285	4.18566	4.22361	0.575982	ENSPTRT00000015410	94	1	2	1	15	1.71111	1.79226	5.12881	3.36358	4.20923	3.18424	0.461681	ENSMMUT00000002207	274	2	7	1	TRUE	TRUE
ENSMMUT00000002207_219	ENSPTRT00000015410_38	ENST00000283882_17	chr16:75433487:-	108	4.6959	2.75859	6.33667	3.34764	3.06128	3.39846	3.64045	0.343517	ENST00000283882	17	2	1	2	114	3.43008	2.91204	2.27131	0.658881	3.14625	2.33609	0.445311	ENSPTRT00000015410	38	2	1	2	30	0.195238	0	3.18545	0	0.359986	0.615057	1.83228	ENSMMUT00000002207	219	3	6	2	TRUE	TRUE
ENSMMUT00000002204_159	ENSPTRT00000082021_174	ENST00000561878_79	chr16:75464611:-	11	0	10.0784	0	2.65452	0	713.214	1.52557	2.39815	ENST00000561878	79	1	1	1	11	0	0	0	0	0	0	0	ENSPTRT00000082021	174	0	1	1	11	0	0	0	0	0	0	0	ENSMMUT00000002204	159	0	1	1	TRUE	TRUE
ENSMMUT00000077717_776	ENSPTRT00000096626_148	ENST00000248248_148	chr16:77191066:+	18	22.3899	268.83	55.3169	10654.1	12488.2	12.7915	73.7495	1.52108	ENST00000248248	148	1	1	4	18	0	0	18.7118	7.93589	0	9.287	1.54467	ENSPTRT00000096626	148	1	1	4	18	7.24552	22.5051	22.4412	0	11.1061	13.6221	0.774565	ENSMMUT00000077717	776	1	7	4	TRUE	TRUE
ENSMMUT00000077717_906	ENSPTRT00000096626_279	ENST00000248248_279	chr16:77191197:+	25	0.748328	2.62438	0	3.52992	0	2.3812	1.655	0.967828	ENST00000248248	279	2	2	3	25	0	0	0.675261	0.667376	0	0.247076	1.36935	ENSPTRT00000096626	279	2	2	3	25	2.27237	0.738858	0	3.97316	0	1.11199	1.2264	ENSMMUT00000077717	906	2	8	3	TRUE	TRUE
ENSMMUT00000077717_931	ENSPTRT00000096626_304	ENST00000248248_304	chr16:77191222:+	10	0	0.950277	0	2.65468	0	0.256646	0.409215	1.63417	ENST00000248248	304	3	3	2	10	0	0	0	0	0	0	0	ENSPTRT00000096626	304	3	3	2	10	0	0	0	0	0.387274	0.0995915	2.23607	ENSMMUT00000077717	931	3	9	2	TRUE	TRUE
ENSMMUT00000077717_970	ENSPTRT00000096626_343	ENST00000248248_343	chr16:77191478:+	8	0	0	0	2.65498	0	0.256621	0.157484	2.20061	ENST00000248248	343	4	4	1	8	0	0	0	0	0	0	0	ENSPTRT00000096626	343	4	4	1	8	0	0	0	0	0.387259	0.0995637	2.23607	ENSMMUT00000077717	970	4	10	1	TRUE	TRUE
ENSMMUT00000054588_727	ENSPTRT00000095149_165	ENST00000219431_118	chr16:79179:+	57	0	0	0	0	0	0	0	0	ENST00000219431	118	0	4	1	117	0	0	1.1887	1.87797	0.434525	0.659484	1.16827	ENSPTRT00000095149	165	4	4	1	54	0	0	0	1.67019	0	0.257913	2.23607	ENSMMUT00000054588	727	4	13	2	TRUE	TRUE
ENSMMUT00000057284_1331	ENSPTRT00000015456_1572	ENST00000393335_55	chr16:81007268:+	20	0.060809	0.122448	0.337812	0.7457	0.698816	0.799031	0.410408	0.714429	ENST00000393335	55	1	1	1	20	0	0	0.0965512	0.0517811	0	0.041793	1.46958	ENSPTRT00000015456	1572	3	18	1	20	0.22762	0	0	0	0	0.027123	2.23607	ENSMMUT00000057284	1331	1	9	1	TRUE	TRUE
ENSMMUT00000028199_303	ENSPTRT00000015499_507	ENST00000343411_511	chr16:84101805:-	22	0	0	0	0	0	0	0	0	ENST00000343411	511	10	10	1	22	0	0	0	0	0	0	0	ENSPTRT00000015499	507	10	10	1	16	0	0	0	0	0	0	0	ENSMMUT00000028199	303	8	8	1	TRUE	TRUE
ENSMMUT00000028199_293	ENSPTRT00000015499_497	ENST00000343411_501	chr16:84101815:-	30	0	0	0	0	0	0	0	0	ENST00000343411	501	9	9	2	30	0	0	0	0	0	0	0	ENSPTRT00000015499	497	9	9	2	26	0	0	0	0	0	0	0	ENSMMUT00000028199	293	7	7	2	TRUE	TRUE
ENSMMUT00000028199_225	ENSPTRT00000015499_429	ENST00000343411_433	chr16:84101883:-	39	0	0	0	0	0	0.385179	0.101415	2.44949	ENST00000343411	433	6	8	3	39	0	0	0	0	0	0	0	ENSPTRT00000015499	429	8	8	3	39	0	0	0	0	0	0	0	ENSMMUT00000028199	225	6	6	3	TRUE	TRUE
ENSMMUT00000028199_211	ENSPTRT00000015499_415	ENST00000343411_419	chr16:84101897:-	12	0	0	0	0	0	0.513239	0.109405	2.44949	ENST00000343411	419	5	7	4	15	0	0	0	0	0	0	0	ENSPTRT00000015499	415	7	7	4	15	0	0	0	0	0	0	0	ENSMMUT00000028199	211	5	5	4	TRUE	TRUE
ENSMMUT00000028199_171	ENSPTRT00000015499_375	ENST00000343411_379	chr16:84101937:-	39	0	0	0	0	0	0	0	0	ENST00000343411	379	8	5	6	39	0	0	0.0594805	0.128235	0	0.0427275	1.51467	ENSPTRT00000015499	375	6	6	5	39	0.227852	0	0	0.664009	0	0.172417	1.61938	ENSMMUT00000028199	171	3	4	5	TRUE	TRUE
ENSMMUT00000028199_135	ENSPTRT00000015499_339	ENST00000343411_343	chr16:84101973:-	75	0	0	0	0	0	0.172371	0.0507555	2.44949	ENST00000343411	343	7	4	7	75	0	0	0.0463412	0.0782908	1.08505	0.196769	1.9529	ENSPTRT00000015499	339	5	5	6	75	0.171189	0	0	0.525825	0	0.129533	1.63828	ENSMMUT00000028199	135	4	3	6	TRUE	TRUE
ENSMMUT00000028199_112	ENSPTRT00000015499_316	ENST00000343411_320	chr16:84101996:-	27	0.841853	1.73034	0	0	0	0.513263	0.650837	1.34151	ENST00000343411	320	3	3	8	27	0	0	0.313977	2.61935	1.38092	0.722166	1.31427	ENSPTRT00000015499	316	3	4	7	27	0.87856	0.591091	1.27027	2.8026	2.30848	1.51896	0.603411	ENSMMUT00000028199	112	2	2	7	TRUE	TRUE
ENSMMUT00000028199_57	ENSPTRT00000015499_261	ENST00000343411_265	chr16:84102051:-	36	0	1.46832	0	0	0	2.11178	0.959384	1.58628	ENST00000343411	265	2	2	9	36	0	0.515352	0	1.67509	1.94412	0.655028	1.1202	ENSPTRT00000015499	261	4	3	8	36	1.75452	1.41276	3.59704	4.52225	0.431102	2.36237	0.713657	ENSMMUT00000028199	57	1	1	8	TRUE	TRUE
ENSMMUT00000046923_201	ENSPTRT00000001602_190	ENST00000456315_56	chr1:68497027:-	21	3.92351	3.36479	11.1818	10.6099	13.4426	4.78671	6.15132	0.552543	ENST00000456315	56	1	1	1	21	0	3.86231	3.0731	1.13571	0	2.15248	1.10048	ENSPTRT00000001602	190	2	2	1	21	3.89698	5.52775	0	0	3.35837	3.00465	0.964852	ENSMMUT00000046923	201	1	3	1	TRUE	TRUE
ENSMMUT00000016664_66	ENSPTRT00000086634_223	ENST00000566428_460	chr16:85066900:+	9	0	0	0	3196.94	5550.87	0	6.69449	1.63116	ENST00000566428	460	1	4	1	9	15.1682	14.7615	41615.8	8.05039	10.9919	17.4175	2.23278	ENSPTRT00000086634	223	1	3	1	9	0	0	0	0	0	0	0	ENSMMUT00000016664	66	0	1	1	TRUE	TRUE
ENSMMUT00000039577_48	ENSPTRT00000060400_184	ENST00000381920_136	chr16:8625543:+	66	2.2406	0.734882	5.86443	2.11951	3.43978	1.50832	2.35308	0.682612	ENST00000381920	136	2	2	2	12	0	0	0	0	0	0	0	ENSPTRT00000060400	184	3	3	2	15	0	0	0	0	0	0	0	ENSMMUT00000039577	48	2	1	2	TRUE	TRUE
ENSMMUT00000039577_107	ENSPTRT00000060400_243	ENST00000381920_195	chr16:8625602:+	27	0	0	0	0.590948	0	1.53867	0.48626	1.76436	ENST00000381920	195	3	3	1	27	0	0	0	0	0	0	0	ENSPTRT00000060400	243	4	4	1	27	0.642454	1.21883	0	0	0	0.317325	1.47467	ENSMMUT00000039577	107	1	2	1	TRUE	TRUE
ENSMMUT00000024770_416	ENSPTRT00000015559_364	ENST00000268616_196	chr16:87491850:-	23	0	0	0	0	0	0	0	0	ENST00000268616	196	0	1	1	23	0	0	0	0	0	0	0	ENSPTRT00000015559	364	0	1	1	23	0	0	0	0	0	0	0	ENSMMUT00000024770	416	2	2	1	TRUE	TRUE
ENSMMUT00000019442_326	ENSPTRT00000001618_267	ENST00000370944_202	chr1:70354521:-	113	2.11038	4.74681	4.89018	18.9746	16.4235	6.94708	6.15311	0.7705	ENST00000370944	202	3	3	1	113	4.20018	6.21848	3.08369	2.29997	6.91883	4.01978	0.436391	ENSPTRT00000001618	267	2	3	1	113	5.21202	4.0696	6.87073	8.29594	5.70757	6.02085	0.268091	ENSMMUT00000019442	326	2	4	1	TRUE	TRUE
ENSMMUT00000019442_288	ENSPTRT00000001618_229	ENST00000370944_164	chr1:70354559:-	72	4.48391	3.27954	9.45621	24.6863	18.6575	11.6582	8.2879	0.689475	ENST00000370944	164	1	2	2	72	7.58319	7.89187	7.76347	4.33375	9.80134	7.01796	0.263762	ENSPTRT00000001618	229	1	2	2	72	11.0989	7.05731	7.42307	9.56609	5.2822	8.09981	0.280856	ENSMMUT00000019442	288	1	3	2	TRUE	TRUE
ENSMMUT00000019442_138	ENSPTRT00000001618_79	ENST00000370944_14	chr1:70354709:-	27	2.80216	3.45997	6.52318	4262.25	6475.84	8.9666	8.03563	1.59306	ENST00000370944	14	2	1	3	27	1.40045	1.54491	2.81033	4.98327	0	2.61423	0.871479	ENSPTRT00000001618	79	3	1	3	27	19.3617	1.59531	0	0	3.95551	3.07163	1.6457	ENSMMUT00000019442	138	3	1	4	TRUE	TRUE
ENSMMUT00000042192_392	ENSPTRT00000105085_426	ENST00000322748_217	chr17:11996994:-	48	0	0	0	0	0	0	0	0	ENST00000322748	217	8	7	3	48	0	0	0	0	10.7556	3.63587	2.23607	ENSPTRT00000105085	426	2	9	2	48	0	0	0	0	0	0	0	ENSMMUT00000042192	392	10	10	1	TRUE	TRUE
ENSMMUT00000042192_371	ENSPTRT00000105085_405	ENST00000322748_196	chr17:11997015:-	69	0	0	0	139.954	0	0	0.314883	2.44949	ENST00000322748	196	6	6	4	69	0	0	0	0	10.735	3.62461	2.23607	ENSPTRT00000105085	405	3	8	3	69	0	0	0	0	0	0	0	ENSMMUT00000042192	371	9	9	2	TRUE	TRUE
ENSMMUT00000042192_336	ENSPTRT00000105085_351	ENST00000322748_142	chr17:11997069:-	123	0	3.99385	0	78.9498	0	0	0.766768	2.31085	ENST00000322748	142	5	5	5	123	0	0	0	0	8.03653	2.63312	2.23607	ENSPTRT00000105085	351	5	7	4	60	0	0	0	0	0	0	0	ENSMMUT00000042192	336	8	8	3	TRUE	TRUE
ENSMMUT00000042192_333	ENSPTRT00000105085_348	ENST00000322748_139	chr17:11997072:-	126	0	3.99277	0	77.0938	0	0	0.766856	2.30778	ENST00000322748	139	4	4	6	126	0	0	0	0	8.03494	2.63239	2.23607	ENSPTRT00000105085	348	6	6	5	63	0	0	0	0	0	0	0	ENSMMUT00000042192	333	7	7	4	TRUE	TRUE
ENSMMUT00000042192_328	ENSPTRT00000105085_343	ENST00000322748_134	chr17:11997077:-	9	0	12.0796	0	0	0	0	1.52462	2.44949	ENST00000322748	134	1	3	7	9	0	0	0	0	0	0	0	ENSPTRT00000105085	343	10	5	6	9	0	0	0	10994.9	0	14.0901	2.23607	ENSMMUT00000042192	328	1	6	5	TRUE	TRUE
ENSMMUT00000042192_303	ENSPTRT00000105085_318	ENST00000322748_109	chr17:11997102:-	156	0	3.98205	0	62.4604	0	0.517972	0.899657	2.25625	ENST00000322748	109	3	2	8	156	0	0	0	0	8.01911	2.41104	2.23607	ENSPTRT00000105085	318	7	4	7	93	0	0	0	31.053	0	3.50256	2.23607	ENSMMUT00000042192	303	2	5	6	TRUE	TRUE
ENSMMUT00000042192_102	ENSPTRT00000105085_116	ENST00000322748_69	chr17:11997304:-	180	0	2.9962	0	54.2657	0	1.53286	1.12223	2.22645	ENST00000322748	69	2	1	9	90	0	0	541.992	0	0	7.60716	2.23607	ENSPTRT00000105085	116	1	1	10	90	68.4541	0	0	0	0	0.517383	2.23607	ENSMMUT00000042192	102	6	1	10	TRUE	TRUE
ENSMMUT00000072025_222	ENSPTRT00000109390_216	ENST00000268712_190	chr17:16194623:-	21	0	0	0	0	0	0	0	0	ENST00000268712	190	2	2	1	21	0	0	0	0	0	0	0	ENSPTRT00000109390	216	2	2	1	21	0.607014	0	0	0	0	0.0470529	2.23607	ENSMMUT00000072025	222	2	2	1	TRUE	TRUE
ENSMMUT00000072025_38	ENSPTRT00000109390_35	ENST00000268712_9	chr17:16215526:-	54	22.3348	1.26176	50.7283	76.4111	6244.6	10.9687	17.1146	2.37544	ENST00000268712	9	1	1	2	54	16.5975	10.8887	20.6294	1.92542	12.7963	12.0558	0.558922	ENSPTRT00000109390	35	1	1	2	57	0.607347	2.21528	27.6934	13.0742	5.26968	5.23081	1.1366	ENSMMUT00000072025	38	1	1	2	TRUE	TRUE
ENSMMUT00000023493_354	ENSPTRT00000080447_1025	ENST00000395824_545	chr17:16567805:-	39	2.24298	0	0	0	6.54134	1.09921	2.03248	1.55362	ENST00000395824	545	1	2	1	39	0	0	0	0	0	0	0	ENSPTRT00000080447	1025	0	6	1	39	0	0	0	0	6.41181	1.07717	2.23607	ENSMMUT00000023493	354	1	1	1	TRUE	TRUE
ENSMMUT00000018731_277	ENSPTRT00000090610_693	ENST00000285071_293	chr17:17232866:-	63	4.78376	3.15365	0	3.52691	1.68595	2.30737	3.0856	0.640454	ENST00000285071	293	1	1	1	63	0	0	2.17756	2.16572	0.136138	1.05337	1.30143	ENSPTRT00000090610	693	2	6	1	63	1.21301	4.93454	0.988029	2.05443	2.49504	2.24453	0.674366	ENSMMUT00000018731	277	2	2	2	TRUE	TRUE
ENSMMUT00000062017_124	ENSPTRT00000059705_142	ENST00000616989_146	chr17:17303480:+	71	440.55	0	0	406.119	1320.07	15.2261	48.4569	1.40663	ENST00000616989	146	1	1	1	71	2776.96	141.804	33.0553	884.789	1504.79	147.076	1.05427	ENSPTRT00000059705	142	1	1	1	71	514.031	3085.13	678.563	0	0	41.2748	1.49947	ENSMMUT00000062017	124	1	1	1	TRUE	TRUE
ENSMMUT00000005176_27	ENSPTRT00000016286_35	ENST00000474627_10	chr17:18039159:-	24	0	1.2425	0	0	0.84412	0.570429	0.48241	1.19706	ENST00000474627	10	2	2	1	24	0	0	0	0	0	0	0	ENSPTRT00000016286	35	0	2	1	24	0.766322	0	0	0.210617	2.09112	0.605707	1.43972	ENSMMUT00000005176	27	2	2	1	TRUE	TRUE
ENSMMUT00000005176_18	ENSPTRT00000016286_26	ENST00000474627_1	chr17:18039168:-	33	0	1.24244	0	0	0.844183	0.855254	0.536065	1.13384	ENST00000474627	1	1	1	2	33	0	0	0	0	0	0	0	ENSPTRT00000016286	26	0	1	2	33	0.862084	0	0	0.21076	2.09099	0.620519	1.40418	ENSMMUT00000005176	18	1	1	2	TRUE	TRUE
ENSMMUT00000042146_71	ENSPTRT00000064121_1304	ENST00000399138_226	chr17:18184053:+	18	0.81628	0.554383	0	1.77016	2.40594	3.90288	1.69249	0.908904	ENST00000399138	226	4	2	3	18	0	0	8.80251	1.02706	1.51899	1.40974	1.63504	ENSPTRT00000064121	1304	9	10	3	18	0.909924	0	0	5.41842	0	1.41927	1.86041	ENSMMUT00000042146	71	3	1	16	TRUE	TRUE
ENSMMUT00000042146_143	ENSPTRT00000064121_1377	ENST00000399138_299	chr17:18184126:+	18	3.92603	7.4374	0	30.0072	3.73996	11.1111	7.20617	1.15119	ENST00000399138	299	2	3	2	18	3.77012	8.68636	5.2753	0.975722	24.2854	6.13126	1.06993	ENSPTRT00000064121	1377	5	11	2	18	0.546064	0.318059	0.817696	5.26392	1.30955	1.37016	1.24354	ENSMMUT00000042146	143	4	2	15	TRUE	TRUE
ENSMMUT00000042146_207	ENSPTRT00000064121_1441	ENST00000399138_363	chr17:18184190:+	36	3.23952	7.39953	0	7.05637	0.657702	13.2297	5.33516	0.947036	ENST00000399138	363	3	4	1	36	0	3.80942	11.7117	5.68803	0.676363	5.38232	1.07578	ENSPTRT00000064121	1441	6	12	1	36	7.21218	5.12359	3.70238	0	2.54219	2.47239	0.72945	ENSMMUT00000042146	207	1	3	14	TRUE	TRUE
ENSMMUT00000019001_264	ENSPTRT00000045819_262	ENST00000542570_186	chr17:18314822:-	42	4.10871	3.58551	90.9405	25.8433	77.752	68.3355	19.8371	0.85783	ENST00000542570	186	1	1	1	42	17.9746	16.3043	20.7433	5.99882	88.0149	15.0751	1.10756	ENSPTRT00000045819	262	1	1	1	42	8.46111	1.1397	6.05462	5.66841	5.74443	4.61241	0.489928	ENSMMUT00000019001	264	1	1	1	TRUE	TRUE
ENSMMUT00000076387_3	ENSPTRT00000016341_99	ENST00000388995_64	chr17:19004162:-	121	7.07245	6.53227	0	40.7238	52.6	15.2039	10.0044	1.04514	ENST00000388995	64	1	1	1	121	0	9.2227	774.829	0.868403	1490.03	11.5775	1.46844	ENSPTRT00000016341	99	1	1	1	121	0	0	0	0	0	0	0	ENSMMUT00000076387	3	0	1	1	TRUE	TRUE
ENSMMUT00000060547_375	ENSPTRT00000082539_372	ENST00000395544_377	chr17:19867560:-	87	0	0	0	221.41	431.593	0	4.75086	1.66522	ENST00000395544	377	3	3	1	87	0	7.6269	1.49518	0	14.0071	7.19684	1.3221	ENSPTRT00000082539	372	3	3	1	87	0	0	0	0	901.893	7.20871	2.23607	ENSMMUT00000060547	375	2	3	1	TRUE	TRUE
ENSMMUT00000060547_290	ENSPTRT00000082539_290	ENST00000395544_295	chr17:19867642:-	33	0	0	3705.68	1.76613	1136.2	0	20.7043	1.84674	ENST00000395544	295	2	2	2	33	1195.5	1356.14	0	0	0	471.695	1.37382	ENSPTRT00000082539	290	1	2	2	36	0	0	0	0	3484.45	716.629	2.23607	ENSMMUT00000060547	290	1	2	2	TRUE	TRUE
ENSMMUT00000060547_152	ENSPTRT00000082539_152	ENST00000395544_157	chr17:19867780:-	63	1115.57	3.97035	2218.77	609.75	793.838	0	81.2641	1.04675	ENST00000395544	157	1	1	3	63	0	0	952.196	299.805	49.7073	25.9885	1.56043	ENSPTRT00000082539	152	2	1	3	63	193.726	0	0	0	0	1.47116	2.23607	ENSMMUT00000060547	152	3	1	3	TRUE	TRUE
ENSMMUT00000058663_56	ENSPTRT00000087471_52	ENST00000225737_29	chr17:19977800:-	78	1.12158	3.66461	0	13.9794	561.323	6.57599	5.06348	2.32308	ENST00000225737	29	1	1	1	78	0	1.71486	1105.39	4.32159	2139.81	5.31722	1.4764	ENSPTRT00000087471	52	1	1	1	78	5.35753	7.49131	0	0.339702	46.2528	8.30124	1.63844	ENSMMUT00000058663	56	1	1	1	TRUE	TRUE
ENSMMUT00000024641_453	ENSPTRT00000015769_802	ENST00000301364_802	chr17:2336706:-	132	0	0	0	0	0	0	0	0	ENST00000301364	802	9	9	1	132	0	0	0	0	0	0	0	ENSPTRT00000015769	802	10	10	1	36	0	0	0	0	0	0	0	ENSMMUT00000024641	453	0	9	1	TRUE	TRUE
ENSMMUT00000024641_423	ENSPTRT00000015769_773	ENST00000301364_773	chr17:2336735:-	27	0	0	0	0	0	581.322	0.612622	2.44949	ENST00000301364	773	4	7	3	27	0	0	0	0	0	0	0	ENSPTRT00000015769	773	8	8	3	66	0	0	0	0	0	0	0	ENSMMUT00000024641	423	0	6	4	TRUE	TRUE
ENSMMUT00000024641_410	ENSPTRT00000015769_760	ENST00000301364_760	chr17:2336748:-	27	0	0	0	0	0	5.09428	1.21857	2.44949	ENST00000301364	760	3	6	4	27	0	0	0	0	0	0	0	ENSPTRT00000015769	760	6	6	5	243	0	0	0	0	0	0	0	ENSMMUT00000024641	410	0	4	6	TRUE	TRUE
ENSMMUT00000024641_391	ENSPTRT00000015769_741	ENST00000301364_741	chr17:2336767:-	33	0	0	0	0	0	0	0	0	ENST00000301364	741	7	5	5	33	0	0	0	0	0	0	0	ENSPTRT00000015769	741	5	5	6	33	0	0	0	0	0	0	0	ENSMMUT00000024641	391	0	3	7	TRUE	TRUE
ENSMMUT00000026312_567	ENSPTRT00000016427_994	ENST00000407008_81	chr17:28042757:+	12	0	0	0	0	0	0	0	0	ENST00000407008	81	3	1	4	12	0	0	0	0	0	0	0	ENSPTRT00000016427	994	0	6	4	12	0	0	0	0	0	0	0	ENSMMUT00000026312	567	7	7	4	TRUE	TRUE
ENSMMUT00000026312_594	ENSPTRT00000016427_1021	ENST00000407008_99	chr17:28042775:+	21	0	0	0	0	0	0	0	0	ENST00000407008	99	4	2	3	21	0	0	0	0	0	0	0	ENSPTRT00000016427	1021	0	7	3	21	0	0	0	0	0	0	0	ENSMMUT00000026312	594	8	8	3	TRUE	TRUE
ENSMMUT00000026312_636	ENSPTRT00000016427_1063	ENST00000407008_141	chr17:28042817:+	12	0	0	0	0	0	0	0	0	ENST00000407008	141	2	3	2	12	0	0	0	0	0	0	0	ENSPTRT00000016427	1063	0	8	2	12	0	0	0	0	0	0	0	ENSMMUT00000026312	636	9	9	2	TRUE	TRUE
ENSMMUT00000026312_644	ENSPTRT00000016427_1071	ENST00000407008_149	chr17:28042825:+	12	0	0	0	0	0	0.197569	0.0715155	2.44949	ENST00000407008	149	1	4	1	12	0	0	0	0	0	0	0	ENSPTRT00000016427	1071	0	9	1	12	0	0	0	0	0	0	0	ENSMMUT00000026312	644	10	10	1	TRUE	TRUE
ENSMMUT00000032943_48	ENSPTRT00000016464_57	ENST00000528896_61	chr17:28645098:-	42	4.10871	2.30685	1.63152	1370.69	1636.23	1.60293	2.80773	1.55078	ENST00000528896	61	1	1	1	42	0.700531	5.57364	3.67751	0.565906	0	2.21306	1.14679	ENSPTRT00000016464	57	1	1	1	42	1.66745	5.15145	0.988026	4.20251	7.74666	4.38388	0.692009	ENSMMUT00000032943	48	1	1	1	TRUE	TRUE
ENSMMUT00000042047_107	ENSPTRT00000016484_805	ENST00000452648_255	chr17:28766680:-	13	0	0	0	0	0	0	0	0	ENST00000452648	255	0	2	1	13	0	0	0	0	0	0	0	ENSPTRT00000016484	805	0	16	1	13	0	0	14.6096	0	0	2.75822	2.23607	ENSMMUT00000042047	107	1	3	1	TRUE	TRUE
ENSMMUT00000042047_96	ENSPTRT00000016484_794	ENST00000452648_244	chr17:28766691:-	12	0	0	0	0	0	0	0	0	ENST00000452648	244	0	1	2	12	0	0	0	0	0	0	0	ENSPTRT00000016484	794	0	15	2	12	0	0	0	0	0	0	0	ENSMMUT00000042047	96	3	2	2	TRUE	TRUE
ENSMMUT00000055239_175	ENSPTRT00000016490_637	ENST00000332830_555	chr17:28950964:-	4	0	0	0	0	0	0	0	0	ENST00000332830	555	2	2	1	4	0	0	0	0	0	0	0	ENSPTRT00000016490	637	2	2	1	4	0	0	0	0	0	0	0	ENSMMUT00000055239	175	0	1	1	TRUE	TRUE
ENSMMUT00000020223_94	ENSPTRT00000044022_75	ENST00000394859_477	chr17:29593608:+	14	0	0	0	0	0	0	0	0	ENST00000394859	477	3	3	1	14	0	0	1873.67	0	0	4.24729	2.23607	ENSPTRT00000044022	75	1	1	1	14	0	4.87112	0	0	5972.63	4.46786	2.23379	ENSMMUT00000020223	94	1	1	1	TRUE	TRUE
ENSMMUT00000042030_31	ENSPTRT00000016517_18	ENST00000345068_2	chr17:29622898:-	216	0	0	0	0	0	0	0	0	ENST00000345068	2	0	1	1	129	0	3.33084	0	0	0	1.31861	2.23607	ENSPTRT00000016517	18	1	1	1	63	0.910114	0	0	0	0	0.18299	2.23607	ENSMMUT00000042030	31	1	1	1	TRUE	TRUE
ENSMMUT00000077348_196	ENSPTRT00000016519_196	ENST00000540801_196	chr17:29930033:-	33	2.43044	8.47218	0	3.28664	9.68766	16.5898	6.75208	0.900997	ENST00000540801	196	1	1	1	33	17.4783	0	3.69138	2.15508	0	4.11266	1.57143	ENSPTRT00000016519	196	1	1	1	33	6.65397	0	0	10.0591	3.26113	4.2516	1.0933	ENSMMUT00000077348	196	1	1	1	TRUE	TRUE
ENSMMUT00000004969_357	ENSPTRT00000016523_577	ENST00000261707_545	chr17:30221990:-	24	0	0	0	0	0	0	0	0	ENST00000261707	545	3	3	1	24	0	0	0	0	0	0	0	ENSPTRT00000016523	577	0	4	1	24	0	0	0	0	0	0	0	ENSMMUT00000004969	357	0	2	1	TRUE	TRUE
ENSMMUT00000004969_133	ENSPTRT00000016523_256	ENST00000261707_224	chr17:30235745:-	6	0	0	0	0	0	0	0	0	ENST00000261707	224	2	1	3	6	0	0	0	0	0	0	0	ENSPTRT00000016523	256	0	1	4	6	0	0	0	0	0	0	0	ENSMMUT00000004969	133	0	1	2	TRUE	TRUE
ENSMMUT00000057698_350	ENSPTRT00000016530_310	ENST00000321990_314	chr17:30832279:+	42	0	0	45.0145	20.9403	1933.54	4.39089	8.24093	2.34687	ENST00000321990	314	1	1	1	42	0	0	1516.97	29.9356	3496.42	16.0004	1.52303	ENSPTRT00000016530	310	1	1	1	42	1446.45	9.92436	0	0	5.33299	4.56704	2.20694	ENSMMUT00000057698	350	1	1	1	TRUE	TRUE
ENSMMUT00000011356_97	ENSPTRT00000094239_162	ENST00000621161_111	chr17:31391785:+	51	0	0	0	0	0	0	0	0	ENST00000621161	111	0	1	1	51	0	0	0	0	0	0	0	ENSPTRT00000094239	162	0	1	1	45	0	0	0	0	0	0	0	ENSMMUT00000011356	97	0	1	2	TRUE	TRUE
ENSMMUT00000041691_221	ENSPTRT00000016663_924	ENST00000614623_455	chr17:36532607:-	54	0.299996	0.367528	0	0.708902	0	1.12216	0.41959	1.04473	ENST00000614623	455	2	3	1	54	0	0	1.42406	0.799028	2.02443	0.904565	1.04569	ENSPTRT00000016663	924	5	8	1	54	0.321788	1.67418	0	0	0	0.606875	1.81925	ENSMMUT00000041691	221	1	3	1	TRUE	TRUE
ENSMMUT00000041691_213	ENSPTRT00000016663_916	ENST00000614623_447	chr17:36532615:-	12	0	0	0	0.443009	0	2.88497	0.401831	2.08286	ENST00000614623	447	3	2	2	12	0	0	1.94222	1.37966	1.78708	1.21075	0.934753	ENSPTRT00000016663	916	3	7	2	12	0.520067	1.32974	0	0	0	0.571019	1.5728	ENSMMUT00000041691	213	2	2	2	TRUE	TRUE
ENSMMUT00000041691_108	ENSPTRT00000016663_811	ENST00000614623_342	chr17:36533991:-	51	0	0.80785	0	1.28736	2.9004	0.679192	0.874867	1.14035	ENST00000614623	342	1	1	3	51	0	0	0.118736	0.271567	0	0.103139	1.53432	ENSPTRT00000016663	811	6	6	3	51	0.560457	1.52889	0	0	0	0.373358	1.59574	ENSMMUT00000041691	108	3	1	3	TRUE	TRUE
ENSMMUT00000028895_92	ENSPTRT00000098630_305	ENST00000612932_337	chr17:38352180:+	65	121.031	0	269.691	738.525	0	5.0444	8.81225	1.53014	ENST00000612932	337	3	5	1	65	0	0	0	0	0	0	0	ENSPTRT00000098630	305	4	5	1	65	0	0	0	0	0	0	0	ENSMMUT00000028895	92	0	1	1	TRUE	TRUE
ENSMMUT00000069298_394	ENSPTRT00000016718_423	ENST00000619039_368	chr17:38799538:-	12	0	0	0	0	0	2.56217	1.52303	2.44949	ENST00000619039	368	1	1	1	12	0	0	2185.78	4707.18	0	28.7463	1.51431	ENSPTRT00000016718	423	1	1	1	12	1518.72	0	0	0	0	4.41835	2.23607	ENSMMUT00000069298	394	1	1	1	TRUE	TRUE
ENSMMUT00000041610_190	ENSPTRT00000016739_221	ENST00000577399_194	chr17:39402330:-	6	0	3689	0	0	0	0	500.063	2.44949	ENST00000577399	194	2	2	2	6	0	0	0	0	0	0	0	ENSPTRT00000016739	221	2	2	1	6	0	0	0	0	26.6729	3.83265	2.23607	ENSMMUT00000041610	190	2	2	1	TRUE	TRUE
ENSMMUT00000041610_131	ENSPTRT00000016739_162	ENST00000577399_135	chr17:39402389:-	60	3251.84	0	0	959.782	625.36	1306.73	1173.8	1.18032	ENST00000577399	135	1	1	3	60	0	0	30.6599	13.6449	0	26.5918	1.52837	ENSPTRT00000016739	162	1	1	2	60	2.41791	1274.1	29.2644	0.842464	16.07	11.8056	2.13382	ENSMMUT00000041610	131	1	1	2	TRUE	TRUE
ENSMMUT00000077120_615	ENSPTRT00000016788_606	ENST00000246672_471	chr17:40100119:-	21	2.24265	0	17.3688	31.6368	2379.51	0.257035	4.15629	2.38741	ENST00000246672	471	1	2	1	21	0	0	0	0	0	0	0	ENSPTRT00000016788	606	3	3	1	21	1.21276	0	0	0	0	0.747734	2.23607	ENSMMUT00000077120	615	1	3	1	TRUE	TRUE
ENSMMUT00000077120_423	ENSPTRT00000016788_414	ENST00000246672_279	chr17:40100311:-	192	3.50733	0	17.5529	29.8298	0	0.369295	2.64904	1.45487	ENST00000246672	279	2	1	2	192	3.91499	5.23296	2.235	0	0	3.01585	1.02526	ENSPTRT00000016788	414	2	2	2	213	0.459267	0	0	0	0	0.120149	2.23607	ENSMMUT00000077120	423	3	2	2	TRUE	TRUE
ENSMMUT00000075112_181	ENSPTRT00000101983_260	ENST00000323571_194	chr17:40256395:+	65	2.56379	7.1717	0	4.85813	40.5429	4.19149	4.19657	1.53793	ENST00000323571	194	1	1	2	65	0.700573	1.54469	1.48412	1.73378	0	1.21012	0.665701	ENSPTRT00000101983	260	3	2	2	65	0.36643	0.296831	0	0	2.15698	0.691994	1.60645	ENSMMUT00000075112	181	1	1	2	TRUE	TRUE
ENSMMUT00000075112_185	ENSPTRT00000101983_264	ENST00000323571_198	chr17:40256399:+	9	0	0	0	2.12422	694.733	1.09935	0.562505	2.43593	ENST00000323571	198	2	2	1	9	0	1.80265	1.84008	1.98731	0	1.24966	0.914927	ENSPTRT00000101983	264	2	3	1	9	0.910024	0.665084	0	0	0.247697	0.331972	1.12038	ENSMMUT00000075112	185	2	2	1	TRUE	TRUE
ENSMMUT00000069387_858	ENSPTRT00000109162_129	ENST00000301391_416	chr17:4143671:+	33	6.7065	8.04901	0	0	190.2	238.405	7.05449	1.48692	ENST00000301391	416	1	1	1	33	0	0	0	0	0	0	0	ENSPTRT00000109162	129	0	1	1	39	0	0	1645.68	2137.47	29.3709	67.9757	1.37091	ENSMMUT00000069387	858	1	2	1	TRUE	TRUE
ENSMMUT00000060050_551	ENSPTRT00000016944_81	ENST00000309428_29	chr17:42609346:-	22	1.3465	0.230957	0	3.53748	6.55764	5.82693	2.15842	0.973369	ENST00000309428	29	1	1	1	22	10.5036	3.82544	2.60383	0.0988684	0	3.03977	1.26041	ENSPTRT00000016944	81	1	1	1	22	1.81846	4.76322	5.0784	0	0	3.0212	1.06329	ENSMMUT00000060050	551	2	8	1	TRUE	TRUE
ENSMMUT00000041372_51	ENSPTRT00000042960_65	ENST00000361523_16	chr17:42824248:-	60	3.98884	4.36959	3.91662	12.4678	26.4483	5.63169	7.0502	0.943114	ENST00000361523	16	1	1	1	60	0	0	0	0	0	0	0	ENSPTRT00000042960	65	0	1	1	60	2.52488	4.43886	6.03685	3.5079	5.55079	4.58079	0.326824	ENSMMUT00000041372	51	1	1	1	TRUE	TRUE
ENSMMUT00000077297_3	ENSPTRT00000016975_305	ENST00000438323_32	chr17:43006771:+	69	0.637425	3.04288	0	2.83195	1.38247	1.2071	1.14462	0.793599	ENST00000438323	32	1	1	1	176	0.9885	0.489137	1.52122	1.654	0.203265	1.05771	0.649391	ENSPTRT00000016975	305	1	7	1	179	0.560393	1.18393	0.560431	1.71678	1.31194	1.04691	0.470875	ENSMMUT00000077297	3	1	1	1	TRUE	TRUE
ENSMMUT00000041277_928	ENSPTRT00000017079_560	ENST00000307275_34	chr17:45160733:+	51	0	0	0	0	0	0	0	0	ENST00000307275	34	3	1	4	51	0	0	0	0	0	0	0	ENSPTRT00000017079	560	10	8	5	51	1.81565	0	0	0	0	0.50119	2.23607	ENSMMUT00000041277	928	4	10	12	TRUE	TRUE
ENSMMUT00000041277_963	ENSPTRT00000017079_595	ENST00000307275_69	chr17:45160768:+	120	0	0	0	0	0	0	0	0	ENST00000307275	69	4	2	3	120	0	0	0	0	0	0	0	ENSPTRT00000017079	595	11	9	4	120	0	0	0	0	0	0	0	ENSMMUT00000041277	963	21	11	11	TRUE	TRUE
ENSMMUT00000041277_1117	ENSPTRT00000017079_749	ENST00000307275_223	chr17:45160922:+	20	0	0	0	480.391	1874.08	784.435	3.90764	1.40885	ENST00000307275	223	1	3	2	357	0	4.52713	0.489794	0	0	0.708627	1.97453	ENSPTRT00000017079	749	3	10	3	309	4.07086	2.82844	0	0	0.40951	1.55562	1.2824	ENSMMUT00000041277	1117	1	12	10	TRUE	TRUE
ENSMMUT00000011830_167	ENSPTRT00000017094_219	ENST00000430334_76	chr17:45482520:-	6	0	0	0	0	0	0	0	0	ENST00000430334	76	0	1	1	6	0	0	8.61753	6.5035	14.1669	4.03976	1.03035	ENSPTRT00000017094	219	1	5	1	6	8.48793	3.84107	0	0	2.29365	2.74249	1.20037	ENSMMUT00000011830	167	1	2	1	TRUE	TRUE
ENSMMUT00000020471_95	ENSPTRT00000001645_35	ENST00000370867_26	chr1:74733177:+	57	7.6395	3.25434	8.40981	11.7313	6.44797	5.3465	6.81087	0.404744	ENST00000370867	26	1	1	2	57	6.49991	3.33063	11.6324	3.61312	2.3931	4.51342	0.684254	ENSPTRT00000001645	35	1	1	1	68	0	0	0	0.488467	1.74576	0.489107	1.69252	ENSMMUT00000020471	95	1	1	1	TRUE	TRUE
ENSMMUT00000030865_436	ENSPTRT00000043342_354	ENST00000362042_278	chr17:48050780:+	6	0	0	0	0.442855	0	0.256573	0.0629962	1.62953	ENST00000362042	278	3	1	3	6	0	0	0	0.106666	0	0.0192401	2.23607	ENSPTRT00000043342	354	4	2	3	6	0	0	0	0	0	0	0	ENSMMUT00000030865	436	4	4	3	TRUE	TRUE
ENSMMUT00000030865_458	ENSPTRT00000043342_376	ENST00000362042_300	chr17:48050802:+	39	0.612244	1.53357	0	5.29693	2.32578	0.575981	0.95143	1.12141	ENST00000362042	300	2	2	2	39	0.571892	0	0.303599	0.860449	4.32552	0.699311	1.45945	ENSPTRT00000043342	376	3	3	2	39	0.909926	0.3581	0	0.019932	0.589956	0.338126	1.03062	ENSMMUT00000030865	458	3	5	2	TRUE	TRUE
ENSMMUT00000030865_561	ENSPTRT00000043342_478	ENST00000362042_402	chr17:48050904:+	180	2.42224	1.00966	2.39626	6.60506	2.17729	1.30222	1.58262	0.763285	ENST00000362042	402	1	3	1	180	0.950591	1.16964	1.05013	0.751585	1.64829	1.10065	0.301305	ENSPTRT00000043342	478	2	4	1	195	1.00275	1.01099	1.25632	0.239385	0.960977	0.870917	0.42948	ENSMMUT00000030865	561	2	6	1	TRUE	TRUE
ENSMMUT00000074978_832	ENSPTRT00000017199_1288	ENST00000413580_356	chr17:49226702:-	11	0	0	0	0	0	0	0	0	ENST00000413580	356	0	2	1	11	0	0	0	0	0	0	0	ENSPTRT00000017199	1288	2	9	1	11	0.827236	0	0	0	0	0.622059	2.23607	ENSMMUT00000074978	832	1	8	3	TRUE	TRUE
ENSMMUT00000042362_227	ENSPTRT00000015890_378	ENST00000262482_263	chr17:4940516:+	18	1.79553	0.835596	0.791461	1.31539	2.40229	1.53909	1.52617	0.422018	ENST00000262482	263	2	1	2	18	1.20382	1.46392	0.71407	0.791138	0	0.795857	0.668561	ENSPTRT00000015890	378	2	2	2	18	1.31867	1.6959	1.82395	0	0.45095	0.932897	0.754655	ENSMMUT00000042362	227	3	2	2	TRUE	TRUE
ENSMMUT00000042362_485	ENSPTRT00000015890_636	ENST00000262482_521	chr17:4940774:+	6	8.17606	16.4141	17.5465	25.0596	20.1815	21.6525	16.6041	0.318028	ENST00000262482	521	1	2	1	6	4.82699	12.9598	9.35793	7.51097	20.438	10.8222	0.548091	ENSPTRT00000015890	636	1	3	1	6	3.51403	6.3085	10.2495	4.39333	10.3188	6.71617	0.460143	ENSMMUT00000042362	485	1	3	1	TRUE	TRUE
ENSMMUT00000063709_48	ENSPTRT00000048539_280	ENST00000320785_255	chr17:4999897:+	78	2.92577	0.164051	0	3.85609	8.51275	0.867705	1.58504	1.18802	ENST00000320785	255	1	1	1	78	0	1.66036	2.70303	0.632545	0.359617	1.25329	1.02869	ENSPTRT00000048539	280	1	1	1	78	0	0.355044	0.421028	0	0.383475	0.315254	0.918432	ENSMMUT00000063709	48	1	1	1	TRUE	TRUE
ENSMMUT00000028208_470	ENSPTRT00000103318_418	ENST00000612501_142	chr17:50150536:-	23	5.71193	2.72843	16.9672	20.3437	11.7996	6.24409	6.99033	0.653968	ENST00000612501	142	1	1	1	23	0.700463	0.927195	3.50966	3.70829	1.82271	2.14711	0.661945	ENSPTRT00000103318	418	2	2	1	23	0.532704	4.37372	1.81125	3.53499	2.1953	2.57521	0.603142	ENSMMUT00000028208	470	3	3	1	TRUE	TRUE
ENSMMUT00000012900_94	ENSPTRT00000017318_94	ENST00000360238_489	chr17:57885795:-	66	0	0	0	0	0	0	0	0	ENST00000360238	489	0	9	1	66	0	0	171.242	0	0	1.36335	2.23607	ENSPTRT00000017318	94	1	3	1	60	0	0	0	0	0	0	0	ENSMMUT00000012900	94	0	3	1	TRUE	TRUE
ENSMMUT00000012900_56	ENSPTRT00000017318_56	ENST00000360238_451	chr17:57885833:-	192	0	0	0	0	0	0	0	0	ENST00000360238	451	0	8	2	269	0	0	3.19645	0	0	0.703095	2.23607	ENSPTRT00000017318	56	2	2	2	168	0	0	0	0	0	0	0	ENSMMUT00000012900	56	0	2	2	TRUE	TRUE
ENSMMUT00000012900_39	ENSPTRT00000017318_39	ENST00000360238_434	chr17:57885850:-	21	0	0	0	0	0	0	0	0	ENST00000360238	434	0	7	3	21	0	0	0	0	0	0	0	ENSPTRT00000017318	39	3	1	3	21	0	0	0	0	0	0	0	ENSMMUT00000012900	39	0	1	3	TRUE	TRUE
ENSMMUT00000063543_385	ENSPTRT00000104835_309	ENST00000393066_309	chr17:59106613:-	39	1.12158	0	16.2678	1.76529	15.5745	0.962026	2.69506	1.30259	ENST00000393066	309	2	4	1	39	0	1.1331	0.625278	1.30055	8.58614	1.45672	1.51753	ENSPTRT00000104835	309	3	4	1	39	3.09122	4.76183	0	5.03997	4.94268	3.41976	0.601902	ENSMMUT00000063543	385	2	4	1	TRUE	TRUE
ENSMMUT00000063543_355	ENSPTRT00000104835_279	ENST00000393066_279	chr17:59106643:-	69	1.12106	0	16.2252	1.7611	15.4395	0.855443	2.25901	1.30805	ENST00000393066	279	3	3	2	69	0	0.999902	0.625652	1.26429	5.72258	1.28433	1.32714	ENSPTRT00000104835	279	4	3	2	69	2.80902	3.57087	0	4.53319	4.44602	3.00598	0.604186	ENSMMUT00000063543	355	3	3	2	TRUE	TRUE
ENSMMUT00000063543_347	ENSPTRT00000104835_271	ENST00000393066_271	chr17:59106651:-	18	0	0	0	0	0	10.2067	1.22017	2.44949	ENST00000393066	271	4	2	3	18	0	0	3122.11	6.06481	0	3.53489	2.23065	ENSPTRT00000104835	271	1	2	3	18	1.21282	0	0	0	0	0.187743	2.23607	ENSMMUT00000063543	347	4	2	3	TRUE	TRUE
ENSMMUT00000063543_108	ENSPTRT00000104835_33	ENST00000393066_33	chr17:59106889:-	315	5.41144	0	11.1691	15.116	14.4204	2.54926	2.86074	0.7841	ENST00000393066	33	1	1	4	315	4.50553	2.55595	3.2619	3.78183	3.69917	3.27911	0.201513	ENSPTRT00000104835	33	2	1	4	237	1.91217	7.75069	4.55991	4.17185	1.00927	4.45588	0.677399	ENSMMUT00000063543	108	1	1	4	TRUE	TRUE
ENSMMUT00000064129_402	ENSPTRT00000017352_256	ENST00000330137_8	chr17:59155179:-	16	1.36616	1.44233	0	1.29853	0.870135	0.704214	0.987931	0.579651	ENST00000330137	8	1	1	1	16	0	0	1.18377	1.08412	0	0.500557	1.37151	ENSPTRT00000017352	256	1	8	1	16	0.808853	0	0	0	0	0.128534	2.23607	ENSMMUT00000064129	402	5	8	1	TRUE	TRUE
ENSMMUT00000004796_146	ENSPTRT00000017357_253	ENST00000262293_252	chr17:59155750:+	56	3.70646	1.12705	1.33539	5.39241	2.33771	2.30183	2.08126	0.594598	ENST00000262293	252	1	1	1	57	1.36601	0.623432	1.3966	0.35344	1.66802	0.949303	0.519805	ENSPTRT00000017357	253	1	1	1	9	1.8176	0	0	0	0	0.0683381	2.23607	ENSMMUT00000004796	146	2	2	1	TRUE	TRUE
ENSMMUT00000059014_2743	ENSPTRT00000017368_1425	ENST00000409433_1453	chr17:59698993:-	27	0	0	0	0	0	0	0	0	ENST00000409433	1453	29	31	1	27	0	0	0	0	0	0	0	ENSPTRT00000017368	1425	27	33	1	27	0	0	0	0	0	0	0	ENSMMUT00000059014	2743	47	59	1	TRUE	TRUE
ENSMMUT00000059014_2720	ENSPTRT00000017368_1402	ENST00000409433_1430	chr17:59699016:-	84	0	0	0	0	0	0	0	0	ENST00000409433	1430	28	30	2	84	0	0	0.260962	1.6664	0	0.568159	1.88061	ENSPTRT00000017368	1402	8	32	2	84	0	0	0	0	0	0	0	ENSMMUT00000059014	2720	46	58	2	TRUE	TRUE
ENSMMUT00000059014_2712	ENSPTRT00000017368_1394	ENST00000409433_1422	chr17:59699024:-	147	0	0	0	0	0	0	0	0	ENST00000409433	1422	27	29	3	147	0	0	0.200539	1.35404	0	0.42753	1.89619	ENSPTRT00000017368	1394	23	31	3	153	0.0886477	0	0	0	0	0.0154648	2.23607	ENSMMUT00000059014	2712	4	57	3	TRUE	TRUE
ENSMMUT00000059014_2684	ENSPTRT00000017368_1366	ENST00000409433_1394	chr17:59699052:-	120	0	0	0	0	0	0	0	0	ENST00000409433	1394	26	28	4	120	0	0	0.242939	1.66577	0	0.508514	1.9004	ENSPTRT00000017368	1366	15	30	4	120	0	0	0	0	0	0	0	ENSMMUT00000059014	2684	44	56	4	TRUE	TRUE
ENSMMUT00000059014_2598	ENSPTRT00000017368_1277	ENST00000409433_1305	chr17:59699141:-	78	0	0	0	0	0	0	0	0	ENST00000409433	1305	25	27	5	78	0	0	5.51731	0	0	0.330042	2.23607	ENSPTRT00000017368	1277	25	29	5	75	0	0	0	0	0	0	0	ENSMMUT00000059014	2598	42	54	6	TRUE	TRUE
ENSMMUT00000059014_2548	ENSPTRT00000017368_1228	ENST00000409433_1254	chr17:59699192:-	129	0.624255	0	0	0.645464	0	0.645058	0.446639	1.09571	ENST00000409433	1254	20	26	6	258	0	0	0.451972	1.18195	0	0.460617	1.58074	ENSPTRT00000017368	1228	20	28	6	36	0	0	0	0	0	0	0	ENSMMUT00000059014	2548	41	53	7	TRUE	TRUE
ENSMMUT00000059014_2336	ENSPTRT00000017368_1016	ENST00000409433_1044	chr17:59699402:-	15	0	0	0	0	0	0	0	0	ENST00000409433	1044	24	24	8	15	0	0	0	0	0	0	0	ENSPTRT00000017368	1016	26	25	9	15	0	0	0	0	0	0	0	ENSMMUT00000059014	2336	38	50	10	TRUE	TRUE
ENSMMUT00000059014_2300	ENSPTRT00000017368_980	ENST00000409433_1008	chr17:59699438:-	6	0	0	0	0	0	0	0	0	ENST00000409433	1008	23	23	9	6	0	0	0	0	0	0	0	ENSPTRT00000017368	980	33	24	10	6	0	0	0	0	0	0	0	ENSMMUT00000059014	2300	37	49	11	TRUE	TRUE
ENSMMUT00000059014_2262	ENSPTRT00000017368_942	ENST00000409433_970	chr17:59699476:-	30	0	0	0	0	0	0	0	0	ENST00000409433	970	31	22	10	30	0	0	0	0	0	0	0	ENSPTRT00000017368	942	32	23	11	30	0	0	0	0	0	0	0	ENSMMUT00000059014	2262	36	48	12	TRUE	TRUE
ENSMMUT00000059014_2258	ENSPTRT00000017368_938	ENST00000409433_966	chr17:59699480:-	48	0	0	0	0	1.96435	0	0.329392	2.44949	ENST00000409433	966	21	21	11	48	0	0	0	7.19328	0	0.73324	2.23607	ENSPTRT00000017368	938	7	22	12	48	0	0	0	0	0	0	0	ENSMMUT00000059014	2258	35	47	13	TRUE	TRUE
ENSMMUT00000059014_2203	ENSPTRT00000017368_883	ENST00000409433_911	chr17:59699535:-	378	0.364251	0	1.86119	0.778181	0.90304	1.46312	0.875517	0.766468	ENST00000409433	911	17	19	13	603	0.470727	0	0.268512	1.96656	0	0.562627	1.51728	ENSPTRT00000017368	883	9	19	15	39	0	0	0	0	0	0	0	ENSMMUT00000059014	2203	33	45	15	TRUE	TRUE
ENSMMUT00000059014_2170	ENSPTRT00000017368_850	ENST00000409433_878	chr17:59699568:-	411	0.342436	0	1.53391	0.778247	0.803219	1.4473	0.821999	0.735075	ENST00000409433	878	18	18	14	636	0.392933	0	0.268724	1.92283	0	0.528762	1.55613	ENSPTRT00000017368	850	10	18	16	72	0	0	0	0	0	0	0	ENSMMUT00000059014	2170	32	44	16	TRUE	TRUE
ENSMMUT00000059014_2128	ENSPTRT00000017368_808	ENST00000409433_836	chr17:59699610:-	453	0.770408	0	1.40988	0.742269	1.22974	1.19	0.990892	0.573541	ENST00000409433	836	16	17	15	678	0.382625	0	0.261353	1.92254	0	0.514807	1.56868	ENSPTRT00000017368	808	13	17	17	114	0	0	0	0	0	0	0	ENSMMUT00000059014	2128	31	43	17	TRUE	TRUE
ENSMMUT00000059014_2122	ENSPTRT00000017368_802	ENST00000409433_830	chr17:59699616:-	459	0.77042	0	1.40986	0.742283	1.71981	1.18998	1.09529	0.623498	ENST00000409433	830	12	16	16	684	0.38266	0	0.261391	1.92249	0	0.514833	1.56862	ENSPTRT00000017368	802	12	16	18	120	0	0	0	0	0	0	0	ENSMMUT00000059014	2122	30	42	18	TRUE	TRUE
ENSMMUT00000059014_2104	ENSPTRT00000017368_784	ENST00000409433_812	chr17:59699634:-	477	0.770453	0	1.40978	0.725519	1.61897	1.18995	1.07876	0.612495	ENST00000409433	812	14	15	17	702	0.382766	0	0.261504	1.92237	0	0.512173	1.56843	ENSPTRT00000017368	784	14	15	19	138	0	0	0	0	0	0	0	ENSMMUT00000059014	2104	29	41	19	TRUE	TRUE
ENSMMUT00000059014_2099	ENSPTRT00000017368_779	ENST00000409433_807	chr17:59699639:-	72	3.91285	0	0	0	3.03913	0	1.62593	1.56744	ENST00000409433	807	5	14	18	72	0	0	0	0	0	0	0	ENSPTRT00000017368	779	31	14	20	72	0	0	0	0	0	0	0	ENSMMUT00000059014	2099	28	40	20	TRUE	TRUE
ENSMMUT00000059014_2033	ENSPTRT00000017368_713	ENST00000409433_741	chr17:59699705:-	138	3.12547	0	0	0.593719	1.85774	0.200107	1.18376	1.31782	ENST00000409433	741	8	13	19	138	0	0	2.97176	0	0	0.410614	2.23607	ENSPTRT00000017368	713	24	13	21	138	1.09113	0	0	20.9741	12.5035	4.61846	1.3692	ENSMMUT00000059014	2033	1	39	21	TRUE	TRUE
ENSMMUT00000059014_1957	ENSPTRT00000017368_637	ENST00000409433_665	chr17:59699781:-	624	0.674819	2.08047	1.13486	0.645414	1.09367	1.42273	1.11476	0.453439	ENST00000409433	665	10	12	20	849	0.296265	0	0.421891	1.66414	0	0.49581	1.44653	ENSPTRT00000017368	637	18	12	22	285	0.992677	0	0	2.4149	5.01399	1.67653	1.25148	ENSMMUT00000059014	1957	2	37	23	TRUE	TRUE
ENSMMUT00000059014_1937	ENSPTRT00000017368_617	ENST00000409433_645	chr17:59699801:-	21	0	0	0	0	0	2.55988	0.191859	2.44949	ENST00000409433	645	22	11	21	21	0	0	3.36641	0	0	0.845482	2.23607	ENSPTRT00000017368	617	5	11	23	21	0	0	0	0	0	0	0	ENSMMUT00000059014	1937	26	36	24	TRUE	TRUE
ENSMMUT00000059014_1851	ENSPTRT00000017368_531	ENST00000409433_559	chr17:59699887:-	30	0	5.36893	0	5.28865	1.96807	2.55001	1.80703	0.948683	ENST00000409433	559	4	8	24	30	0	0	0	0	0	0	0	ENSPTRT00000017368	531	30	8	26	30	0	0	0	0	0	0	0	ENSMMUT00000059014	1851	25	35	25	TRUE	TRUE
ENSMMUT00000059014_1840	ENSPTRT00000017368_520	ENST00000409433_548	chr17:59699898:-	741	0.540646	2.24698	0.967482	0.855552	1.27144	1.53589	1.20575	0.48714	ENST00000409433	548	7	7	25	966	0.274184	0	0.552699	1.57343	0	0.486654	1.3596	ENSPTRT00000017368	520	19	7	27	402	1.81368	0	0	1.97615	3.85681	1.51124	1.0531	ENSMMUT00000059014	1840	3	34	26	TRUE	TRUE
ENSMMUT00000059014_1749	ENSPTRT00000017368_429	ENST00000409433_457	chr17:59699989:-	6	0	0	0	0	0	0	0	0	ENST00000409433	457	30	6	26	6	0	0	0	0	0	0	0	ENSPTRT00000017368	429	29	6	28	6	0	0	0	0	0	0	0	ENSMMUT00000059014	1749	24	33	27	TRUE	TRUE
ENSMMUT00000059014_1709	ENSPTRT00000017368_389	ENST00000409433_417	chr17:59700029:-	177	2.61405	3.01274	11.3409	2.80962	1.42998	2.54289	3.20728	0.924217	ENST00000409433	417	2	5	27	177	0	0	0	0	0	0	0	ENSPTRT00000017368	389	28	5	29	177	0	0	0	0	0	0	0	ENSMMUT00000059014	1709	23	32	28	TRUE	TRUE
ENSMMUT00000059014_1686	ENSPTRT00000017368_366	ENST00000409433_394	chr17:59700052:-	24	12.3059	0	0	4.71117	0	0	2.40621	1.76552	ENST00000409433	394	3	4	28	24	0	0	0	3.78867	0	1.16458	2.23607	ENSPTRT00000017368	366	2	4	30	24	0	0	0	0	0	0	0	ENSMMUT00000059014	1686	22	31	29	TRUE	TRUE
ENSMMUT00000059014_1608	ENSPTRT00000017368_288	ENST00000409433_316	chr17:59700130:-	9	0	0	0	0	1.31266	6.40514	1.37326	1.99183	ENST00000409433	316	6	3	29	9	0	0	4.48906	0	0	1.04618	2.23607	ENSPTRT00000017368	288	3	3	31	9	0	0	0	0	0	0	0	ENSMMUT00000059014	1608	21	30	30	TRUE	TRUE
ENSMMUT00000059014_1571	ENSPTRT00000017368_251	ENST00000409433_279	chr17:59700167:-	36	2.98585	0	0	2.12198	1.64041	1.02603	1.13699	0.918937	ENST00000409433	279	9	2	30	36	0	0	0	1.85774	0	0.81418	2.23607	ENSPTRT00000017368	251	6	2	32	36	0	0	0	0	0	0	0	ENSMMUT00000059014	1571	20	29	31	TRUE	TRUE
ENSMMUT00000062981_99	ENSPTRT00000017373_94	ENST00000225577_24	chr17:59893144:+	41	0.408731	4.43738	11.3071	14.1003	2.35955	4.80344	4.22129	0.854071	ENST00000225577	24	1	1	1	41	2.21092	2.89632	2.50259	2.16757	6.9342	3.0329	0.607033	ENSPTRT00000017373	94	1	2	1	41	5.45444	0.70942	5.39673	5.04228	1.76655	3.20974	0.615253	ENSMMUT00000062981	99	1	2	1	TRUE	TRUE
ENSMMUT00000012868_85	ENSPTRT00000017375_63	ENST00000305783_47	chr17:59964694:-	31	0	4.43863	6.52356	1.17985	0	1.92276	1.96578	1.11859	ENST00000305783	47	1	1	1	31	0	1.54506	0	0	0	0.462854	2.23607	ENSPTRT00000017375	63	1	1	1	31	1.61729	0	0	1.34536	0	0.433296	1.37889	ENSMMUT00000012868	85	1	1	1	TRUE	TRUE
ENSMMUT00000010123_138	ENSPTRT00000017405_102	ENST00000444766_73	chr17:61927944:-	4	0	0	0	0	0	0.570116	0.254624	2.44949	ENST00000444766	73	1	1	1	132	0	0.0991496	0.340003	1.01182	0	0.30745	1.47025	ENSPTRT00000017405	102	1	1	2	132	0.609179	0	0	5.96823	2.22257	2.12042	1.43298	ENSMMUT00000010123	138	1	1	2	TRUE	TRUE
ENSMMUT00000041727_128	ENSPTRT00000065721_63	ENST00000397786_33	chr17:62065246:-	41	4.46861	2.82433	29.1663	4.24011	7.364	5.10294	5.47943	1.13501	ENST00000397786	33	2	2	1	41	0	0	0.803647	0	0	0.255703	2.23607	ENSPTRT00000065721	63	2	2	1	41	0.910178	0	0	0	0	0.0778491	2.23607	ENSMMUT00000041727	128	3	4	1	TRUE	TRUE
ENSMMUT00000041727_121	ENSPTRT00000065721_56	ENST00000397786_26	chr17:62065253:-	42	4.46811	4.03201	29.1611	4.23987	7.3635	5.10227	6.22332	1.09497	ENST00000397786	26	1	1	2	42	0	0	0.937317	0	0	0.340764	2.23607	ENSPTRT00000065721	56	1	1	2	42	3.60679	0	0	0	0	0.104684	2.23607	ENSMMUT00000041727	121	2	3	2	TRUE	TRUE
ENSMMUT00000075594_23	ENSPTRT00000017452_491	ENST00000361357_256	chr17:63622697:+	24	13.4243	0	0	2797.45	0	7.64351	3.04789	2.42755	ENST00000361357	256	3	3	1	24	5.24861	0	7.10793	0	0	2.36277	1.3949	ENSPTRT00000017452	491	3	4	1	24	4.8482	11.9451	0	5.60031	0	4.46985	1.10098	ENSMMUT00000075594	23	1	1	1	TRUE	TRUE
ENSMMUT00000023561_6	ENSPTRT00000064665_88	ENST00000310144_32	chr17:63827462:+	29	0.64534	1.03695	1.20539	1.16115	3.9028	3.33853	2.04246	0.729675	ENST00000310144	32	1	1	1	29	1.80868	0.837056	2.53012	1.14942	0.190724	1.17672	0.690543	ENSPTRT00000064665	88	1	1	1	29	0.836165	0.360699	0	1.20745	0.278391	0.41574	0.896429	ENSMMUT00000023561	6	1	1	1	TRUE	TRUE
ENSMMUT00000064363_37	ENSPTRT00000017495_25	ENST00000615220_7	chr17:64449043:+	129	0	5.94164	0	0	0	1.27677	0.493718	1.97572	ENST00000615220	7	1	1	2	69	4.49047	0	0	91.9406	0	0.872589	2.10832	ENSPTRT00000017495	25	2	1	2	69	0	0	0	0	0	0	0	ENSMMUT00000064363	37	2	1	2	TRUE	TRUE
ENSMMUT00000064363_126	ENSPTRT00000017495_114	ENST00000615220_96	chr17:64449132:+	37	0	0	0	0	0	1.28092	0.163974	2.44949	ENST00000615220	96	2	2	1	37	0	1.80228	0.34927	5.77692	0	1.14659	1.55023	ENSPTRT00000017495	114	1	2	1	37	1477.7	0	0	3378.94	0	8.14361	1.53425	ENSMMUT00000064363	126	1	2	1	TRUE	TRUE
ENSMMUT00000013206_105	ENSPTRT00000017496_1889	ENST00000539111_54	chr17:64497001:-	21	0	0	0	0	0	0.513383	0.0830292	2.44949	ENST00000539111	54	1	1	1	21	0	0	0	0	0	0	0	ENSPTRT00000017496	1889	0	32	1	21	0	0	0	0	0	0	0	ENSMMUT00000013206	105	0	1	1	TRUE	TRUE
ENSMMUT00000005359_838	ENSPTRT00000015944_2246	ENST00000361413_104	chr17:6635143:-	36	0.997572	0	0	3.53039	0	0	0.763732	1.87788	ENST00000361413	104	2	2	1	36	0	0	0	0.929315	0	0.229827	2.23607	ENSPTRT00000015944	2246	4	43	1	40	0	0	0	0	0	0	0	ENSMMUT00000005359	838	0	12	2	TRUE	TRUE
ENSMMUT00000005359_812	ENSPTRT00000015944_2220	ENST00000361413_78	chr17:6635169:-	30	2.8835	17.283	0	58.12	17.5662	10.1709	9.95809	1.19338	ENST00000361413	78	1	1	2	30	0	0	1.12434	1.83401	4.62512	1.35103	1.25609	ENSPTRT00000015944	2220	2	42	2	27	0	0	0	0	0	0	0	ENSMMUT00000005359	812	0	11	3	TRUE	TRUE
ENSMMUT00000060753_308	ENSPTRT00000015945_57	ENST00000250101_62	chr17:6640819:+	27	0	0	0	0	0	291.161	56.4514	2.44949	ENST00000250101	62	1	1	3	27	0	0	1110.73	0	9.08186	15.246	2.21347	ENSPTRT00000015945	57	1	1	3	27	0	0	0	0	0	0	0	ENSMMUT00000060753	308	3	2	3	TRUE	TRUE
ENSMMUT00000060753_400	ENSPTRT00000015945_153	ENST00000250101_158	chr17:6640915:+	36	0	0	0	0	0	0	0	0	ENST00000250101	158	2	2	2	150	0	0.162358	0.150375	0.171743	0	0.112387	0.916211	ENSPTRT00000015945	153	2	2	2	166	0.323412	0	0.638669	0.467584	0	0.301974	0.992802	ENSMMUT00000060753	400	1	3	2	TRUE	TRUE
ENSMMUT00000060753_406	ENSPTRT00000015945_159	ENST00000250101_164	chr17:6640921:+	30	0	0	0	0	0	0	0	0	ENST00000250101	164	3	3	1	144	0	0.162344	0.150358	0.17172	0	0.11237	0.91621	ENSPTRT00000015945	159	3	3	1	160	0.323392	0	0.638659	0.46757	0	0.301954	0.992812	ENSMMUT00000060753	406	2	4	1	TRUE	TRUE
ENSMMUT00000004193_384	ENSPTRT00000017533_175	ENST00000580168_111	chr17:67239471:-	54	5.57578	2.8821	0	3196.94	25.1879	2.42133	5.48032	2.41676	ENST00000580168	111	2	7	1	54	1.81532	6.29249	2.31415	7.03276	11.1969	4.82496	0.669614	ENSPTRT00000017533	175	1	8	1	54	1.73654	0.925106	2.4162	3.06852	1.48401	2.04139	0.432729	ENSMMUT00000004193	384	1	5	1	TRUE	TRUE
ENSMMUT00000004193_357	ENSPTRT00000017533_148	ENST00000580168_84	chr17:67243792:-	18	0	0	0	533.657	11.7847	0.855222	1.38705	2.38202	ENST00000580168	84	6	6	2	18	0	0	0.312601	2.89003	0	0.442153	1.97459	ENSPTRT00000017533	148	5	7	2	18	0.10137	0	0	0	0	0.0104589	2.23607	ENSMMUT00000004193	357	3	4	2	TRUE	TRUE
ENSMMUT00000004193_336	ENSPTRT00000017533_127	ENST00000580168_63	chr17:67243813:-	39	0	0	0	3.50551	7.07425	1.53846	1.58884	1.40435	ENST00000580168	63	4	5	3	39	0	0	0.225287	2.37387	0	0.420532	2.00261	ENSPTRT00000017533	127	6	6	3	39	0.182458	0	0	0	0	0.0185169	2.23607	ENSMMUT00000004193	336	2	3	3	TRUE	TRUE
ENSMMUT00000004193_317	ENSPTRT00000017533_108	ENST00000580168_44	chr17:67243832:-	9	2.8045	0	0	0	5.24723	0.855151	1.98994	1.44189	ENST00000580168	44	3	3	5	9	0	0	0.125221	0.542153	12.1381	0.510394	2.09221	ENSPTRT00000017533	108	4	4	5	9	0	0	0	0	0	0	0	ENSMMUT00000004193	317	4	2	4	TRUE	TRUE
ENSMMUT00000026149_453	ENSPTRT00000017571_961	ENST00000284425_165	chr17:69140735:-	27	0	0	0	0	0	0	0	0	ENST00000284425	165	0	2	1	27	0	0	0	0	0	0	0	ENSPTRT00000017571	961	0	12	1	27	0	0	0	0	0	0	0	ENSMMUT00000026149	453	0	3	1	TRUE	TRUE
ENSMMUT00000014758_594	ENSPTRT00000015980_105	ENST00000318988_241	chr17:7251524:-	84	0.916176	0.246032	0.52255	1.38533	0.795366	0.919656	0.682167	0.487008	ENST00000318988	241	2	2	1	84	3.12818	2.34306	5.10008	0.82797	1.77805	2.46175	0.611968	ENSPTRT00000015980	105	1	1	1	84	0.55731	2.62455	2.54355	2.13183	0.258388	1.76091	0.696166	ENSMMUT00000014758	594	2	2	1	TRUE	TRUE
ENSMMUT00000033223_154	ENSPTRT00000016012_3148	ENST00000311403_313	chr17:7467275:-	28	0	0	0	10.5263	10.7875	6.82285	2.68231	1.13553	ENST00000311403	313	2	2	1	28	2.18832	1.85354	2.43467	0	7.41793	1.89133	0.994766	ENSPTRT00000016012	3148	1	54	1	28	1.61703	0	0	0	0	0.239278	2.23607	ENSMMUT00000033223	154	1	1	1	TRUE	TRUE
ENSMMUT00000025323_552	ENSPTRT00000017682_13	ENST00000402418_883	chr17:75286792:-	28	0	0.80781	0	1.93091	2.18744	2.5644	1.55836	0.905571	ENST00000402418	883	1	14	1	28	0	1.50101	0.375224	0.667279	1.30672	0.929389	0.816623	ENSPTRT00000017682	13	1	1	1	28	0.520232	0	1.77809	0	0	0.511146	1.67661	ENSMMUT00000025323	552	4	4	1	TRUE	TRUE
ENSMMUT00000030626_257	ENSPTRT00000017709_257	ENST00000588479_262	chr17:75765450:-	180	0	0	0	0	0	0	0	0	ENST00000588479	262	3	2	2	180	0	0	0	0	0	0	0	ENSPTRT00000017709	257	0	2	1	224	0	0	0	0	0	0	0	ENSMMUT00000030626	257	0	3	1	TRUE	TRUE
ENSMMUT00000030626_93	ENSPTRT00000017709_93	ENST00000588479_98	chr17:75765614:-	478	0.844374	0.107548	0	4.51525	0.375117	0.206875	0.40015	1.72921	ENST00000588479	98	1	1	3	388	0	0	0	0	0	0	0	ENSPTRT00000017709	93	0	1	2	324	0	0	0	0	0	0	0	ENSMMUT00000030626	93	0	2	2	TRUE	TRUE
ENSMMUT00000005009_752	ENSPTRT00000077526_205	ENST00000446526_210	chr17:76353940:-	78	17.5841	0	0	0	0	0	1.7359	2.44949	ENST00000446526	210	2	3	1	78	0	5.37905	0.900165	0	0	1.72967	1.86143	ENSPTRT00000077526	205	1	3	1	90	0	0	0	3.04468	0	0.666209	2.23607	ENSMMUT00000005009	752	2	7	1	TRUE	TRUE
ENSMMUT00000005009_715	ENSPTRT00000077526_168	ENST00000446526_173	chr17:76353977:-	12	0	0	0	1598.97	0	0	250.531	2.44949	ENST00000446526	173	1	2	2	12	0	0	0	0	0	0	0	ENSPTRT00000077526	168	3	2	2	12	0	0	0	23435.4	0	79.2515	2.23607	ENSMMUT00000005009	715	1	6	2	TRUE	TRUE
ENSMMUT00000032358_257	ENSPTRT00000065987_297	ENST00000392476_482	chr17:77142703:+	27	1.86988	1.13583	3.9885	5.89725	0	1.4657	1.48938	0.901482	ENST00000392476	482	3	8	2	27	0	0	1.28522	0.879053	0	0.59599	1.40892	ENSPTRT00000065987	297	2	3	2	27	2.20241	0.864401	0	0	1.41665	0.977387	1.05569	ENSMMUT00000032358	257	2	2	2	TRUE	TRUE
ENSMMUT00000032358_283	ENSPTRT00000065987_323	ENST00000392476_508	chr17:77142729:+	52	0.97062	1.0385	0.0839383	1.68617	0.499775	0.855107	0.810176	0.631202	ENST00000392476	508	5	9	1	52	0.400318	0.119671	0.415148	0.688806	1.47279	0.378046	0.836069	ENSPTRT00000065987	323	4	4	1	52	1.32334	0	0	1.05528	0.599526	0.541984	1.01097	ENSMMUT00000032358	283	3	3	1	TRUE	TRUE
ENSMMUT00000016713_98	ENSPTRT00000017808_281	ENST00000392467_115	chr17:78126906:-	33	1.52454	2.09395	1.93658	6.16269	4.34466	5.07829	2.66598	0.547615	ENST00000392467	115	1	2	1	51	2.10095	1.47989	6.07841	0.813164	3.37388	2.40615	0.749928	ENSPTRT00000017808	281	1	3	1	51	0.820232	0.639407	1.79512	1.20584	2.5228	1.28743	0.551014	ENSMMUT00000016713	98	1	1	1	TRUE	TRUE
ENSMMUT00000057023_244	ENSPTRT00000046803_141	ENST00000613533_81	chr1:7784694:+	30	0	0	0	0	0	0	0	0	ENST00000613533	81	0	1	3	30	15.1255	9.87155	999.755	18.9258	18.0745	13.6139	2.07293	ENSPTRT00000046803	141	1	1	3	30	0	23.7576	0	0	0	13.1723	2.23607	ENSMMUT00000057023	244	1	1	3	TRUE	TRUE
ENSMMUT00000057023_270	ENSPTRT00000046803_167	ENST00000613533_107	chr1:7784720:+	45	0	0	0	0	0	0	0	0	ENST00000613533	107	0	2	2	45	0	0.442753	0	0	47.9716	3.38774	2.2106	ENSPTRT00000046803	167	2	2	2	90	1.79827	1019.48	10.4813	0	10.2713	6.20046	2.1757	ENSMMUT00000057023	270	2	2	2	TRUE	TRUE
ENSMMUT00000057023_312	ENSPTRT00000046803_216	ENST00000613533_156	chr1:7784769:+	51	0	0	0	0	0	0	0	0	ENST00000613533	156	0	3	1	51	0	0	0	2.78327	12.0676	2.01921	1.75965	ENSPTRT00000046803	216	3	3	1	48	1.80818	0	0	0	20.5136	3.69945	2.01729	ENSMMUT00000057023	312	3	3	1	TRUE	TRUE
ENSMMUT00000077184_471	ENSPTRT00000016049_180	ENST00000333775_143	chr17:7857712:-	81	0	0	0	0	0	0	0	0	ENST00000333775	143	4	4	1	81	0	6.64366	3.84596	8.56712	0	3.56744	1.01357	ENSPTRT00000016049	180	2	3	1	81	0	0	0	0	0	0	0	ENSMMUT00000077184	471	8	8	1	TRUE	TRUE
ENSMMUT00000077184_431	ENSPTRT00000016049_140	ENST00000333775_103	chr17:7857752:-	48	0	0	0	0	0	0	0	0	ENST00000333775	103	2	2	3	48	0	0	13.4061	0	0	3.64452	2.23607	ENSPTRT00000016049	140	1	2	2	21	0	0	0	0	0	0	0	ENSMMUT00000077184	431	7	7	2	TRUE	TRUE
ENSMMUT00000077184_374	ENSPTRT00000016049_83	ENST00000333775_46	chr17:7857809:-	105	0	0	0	1.17938	0	0	0.142918	2.44949	ENST00000333775	46	1	1	4	105	0	0	4.32286	0	0	1.54196	2.23607	ENSPTRT00000016049	83	3	1	3	15	0	0	0	0	0	0	0	ENSMMUT00000077184	374	5	5	4	TRUE	TRUE
ENSMMUT00000007534_167	ENSPTRT00000017837_331	ENST00000542802_438	chr17:78836370:-	7	35.8423	3.02856	0	2740.38	0	0	4.33519	2.40857	ENST00000542802	438	1	4	1	7	0	0	0	0.271252	0	0.0541739	2.23607	ENSPTRT00000017837	331	3	3	1	7	1.51632	0	0	0	0	0.29863	2.23607	ENSMMUT00000007534	167	2	4	1	TRUE	TRUE
ENSMMUT00000007534_124	ENSPTRT00000017837_288	ENST00000542802_395	chr17:78838627:-	12	4.23843	2.33786	0	9.43183	15.7259	1.28251	3.34485	1.08932	ENST00000542802	395	2	3	2	12	0	0	0	0.570687	0	0.0945656	2.23607	ENSPTRT00000017837	288	2	2	2	50	1.12646	0	0	0	0	0.172131	2.23607	ENSMMUT00000007534	124	3	2	3	TRUE	TRUE
ENSMMUT00000031262_395	ENSPTRT00000016062_368	ENST00000380262_337	chr17:7932491:+	54	3.92414	2.22739	0	0.355446	92.9564	1.15422	3.7139	2.22729	ENST00000380262	337	1	1	4	48	2.10063	2.61913	7.48709	1.35491	3.11505	2.81059	0.722758	ENSPTRT00000016062	368	1	2	4	48	1.36459	1.48298	0	0	1.23678	0.872388	0.919072	ENSMMUT00000031262	395	3	2	6	TRUE	TRUE
ENSMMUT00000031262_767	ENSPTRT00000016062_745	ENST00000380262_717	chr17:7932871:+	209	0.726655	0.82861	3.91005	0.818372	0.851818	0.888115	1.02578	0.94337	ENST00000380262	717	4	3	2	208	0	1.83558	1.02534	0.823549	0	0.844788	1.04762	ENSPTRT00000016062	745	2	4	2	209	0.837849	1.36497	0.825846	1.39085	0.614439	1.02198	0.348	ENSMMUT00000031262	767	1	5	3	TRUE	TRUE
ENSMMUT00000031262_785	ENSPTRT00000016062_763	ENST00000380262_735	chr17:7932889:+	191	0.771949	0.897578	4.04522	0.547319	0.926821	0.785551	1.03963	1.00622	ENST00000380262	735	3	4	1	190	0	1.25975	0.926283	0.856015	0	0.675552	0.946666	ENSPTRT00000016062	763	3	5	1	191	0.667579	1.01315	0.502016	1.46308	0.703282	0.886977	0.436423	ENSMMUT00000031262	785	2	6	2	TRUE	TRUE
ENSMMUT00000062448_329	ENSPTRT00000017866_331	ENST00000269385_9	chr17:79797069:-	71	0	0	0	0	0	0	0	0	ENST00000269385	9	0	1	1	71	0	0	0	0	0	0	0	ENSPTRT00000017866	331	0	1	1	71	1.59076	0	0	0	0	0.437417	2.23607	ENSMMUT00000062448	329	1	1	1	TRUE	TRUE
ENSMMUT00000040891_154	ENSPTRT00000098877_154	ENST00000374759_122	chr17:81295186:-	45	8.96781	1.00965	0.502903	33.3762	31.3996	14.2641	9.78755	0.970999	ENST00000374759	122	1	1	1	45	14.214	9.82128	117.634	4.78988	6.57353	10.2743	1.59383	ENSPTRT00000098877	154	1	1	1	45	5.42954	8.34625	7.78157	11.0711	24.1443	11.0379	0.654008	ENSMMUT00000040891	154	1	2	1	TRUE	TRUE
ENSMMUT00000053766_54	ENSPTRT00000000237_251	ENST00000377482_206	chr1:8015639:-	20	0	0	0	0	0	0	0	0	ENST00000377482	206	4	4	1	20	0	0	0	0	0	0	0	ENSPTRT00000000237	251	5	5	1	20	0	0	0	0	0	0	0	ENSMMUT00000053766	54	3	3	1	TRUE	TRUE
ENSMMUT00000053766_4	ENSPTRT00000000237_201	ENST00000377482_156	chr1:8015689:-	18	0	0	0	3.53318	0	0	1.01738	2.44949	ENST00000377482	156	3	3	2	18	0	0	0	0	0	0	0	ENSPTRT00000000237	201	4	4	2	18	7.26794	0	0	0	0	1.19311	2.23607	ENSMMUT00000053766	4	1	1	3	TRUE	TRUE
ENSMMUT00000004935_101	ENSPTRT00000056739_72	ENST00000592764_28	chr18:13730628:+	51	0	3.57082	0	7.04525	6.54919	0.481253	2.04605	1.11335	ENST00000592764	28	1	1	2	51	0	0	0.963988	0	2.16894	0.521231	1.52881	ENSPTRT00000056739	72	1	1	2	51	0.957826	0	0.88928	1.37019	0	0.637633	0.956584	ENSMMUT00000004935	101	1	3	2	TRUE	TRUE
ENSMMUT00000004935_238	ENSPTRT00000056739_209	ENST00000592764_165	chr18:13731485:+	27	0	0.828485	0	2.65209	0	0.0804178	0.363014	1.78522	ENST00000592764	165	2	2	1	27	0	0	0.595581	0.301328	0	0.217531	1.48706	ENSPTRT00000056739	209	2	2	1	33	0.728191	0	0	0	0	0.0646241	2.23607	ENSMMUT00000004935	238	3	4	1	TRUE	TRUE
ENSMMUT00000018212_799	ENSPTRT00000018196_1499	ENST00000269214_771	chr18:21574979:-	21	0	2.01835	0	0	0	0.197751	0.382217	2.19766	ENST00000269214	771	6	10	1	21	0	0	0	0	0	0	0	ENSPTRT00000018196	1499	10	15	1	21	0	0	0	0	0	0	0	ENSMMUT00000018212	799	12	12	1	TRUE	TRUE
ENSMMUT00000018212_755	ENSPTRT00000018196_1455	ENST00000269214_727	chr18:21575023:-	30	0	0	0	0	0	0	0	0	ENST00000269214	727	10	9	2	30	0	0	0	0	0	0	0	ENSPTRT00000018196	1455	9	14	2	30	0	0	1.8827	0	0	0.629589	2.23607	ENSMMUT00000018212	755	3	11	2	TRUE	TRUE
ENSMMUT00000018212_744	ENSPTRT00000018196_1444	ENST00000269214_716	chr18:21575034:-	9	0	1.07696	0	0	0	0	0.370344	2.44949	ENST00000269214	716	8	8	3	9	0	0	0	0	0	0	0	ENSPTRT00000018196	1444	8	13	3	9	0	0	0	0	0	0	0	ENSMMUT00000018212	744	11	10	3	TRUE	TRUE
ENSMMUT00000018212_729	ENSPTRT00000018196_1429	ENST00000269214_701	chr18:21575049:-	24	0	1.07693	0	0	0	0	0.34976	2.44949	ENST00000269214	701	9	7	4	24	0	0	0	0	0	0	0	ENSPTRT00000018196	1429	7	12	4	24	0	0	0	0	0	0	0	ENSMMUT00000018212	729	10	9	4	TRUE	TRUE
ENSMMUT00000018212_466	ENSPTRT00000018196_1169	ENST00000269214_441	chr18:21575309:-	90	0	0	0	2.11753	11.0637	0.583567	1.10568	1.90652	ENST00000269214	441	5	6	5	90	1.12957	1.74979	0	0.754508	0	0.62882	1.03562	ENSPTRT00000018196	1169	4	11	5	90	1.07036	1.08032	0	3.22939	0	0.832868	1.22526	ENSMMUT00000018212	466	2	8	5	TRUE	TRUE
ENSMMUT00000018212_303	ENSPTRT00000018196_1006	ENST00000269214_278	chr18:21575713:-	246	0.209136	0.321495	3.79808	2.52313	6.33028	0.606122	1.40552	1.06043	ENST00000269214	278	4	5	6	246	0.574723	0.77309	0.631844	1.7049	1.56329	0.989738	0.515241	ENSPTRT00000018196	1006	3	9	7	246	0.836452	0.71844	0	0.75119	0	0.424404	0.917637	ENSMMUT00000018212	303	4	5	8	TRUE	TRUE
ENSMMUT00000018212_296	ENSPTRT00000018196_999	ENST00000269214_271	chr18:21575720:-	18	0	1.44217	0	0.708709	9.83356	0.320905	1.94168	1.87767	ENST00000269214	271	3	4	7	18	0	0	1.12455	4.33536	17.173	2.26107	1.61028	ENSPTRT00000018196	999	1	8	8	18	0	0	0	0	0	0	0	ENSMMUT00000018212	296	7	4	9	TRUE	TRUE
ENSMMUT00000018212_277	ENSPTRT00000018196_980	ENST00000269214_249	chr18:21575742:-	102	28.3756	0.594364	5.702	3.21207	7.00533	0.437037	1.97182	1.3949	ENST00000269214	249	2	3	8	99	0	0.773005	0.637645	2.12322	2.645	1.26103	0.893116	ENSPTRT00000018196	980	2	7	9	99	1.21285	0	0	0	0	0.123439	2.23607	ENSMMUT00000018212	277	6	3	10	TRUE	TRUE
ENSMMUT00000018212_252	ENSPTRT00000018196_955	ENST00000269214_224	chr18:21575767:-	9	0	0	0	1.76952	0	0.513144	0.381911	1.86831	ENST00000269214	224	7	2	9	9	0	0	0.656107	0	0	0.21381	2.23607	ENSPTRT00000018196	955	5	6	10	9	2.93928	1.32972	3.55602	0.0673834	0	1.18462	1.03126	ENSMMUT00000018212	252	1	2	11	TRUE	TRUE
ENSMMUT00000018212_59	ENSPTRT00000018196_553	ENST00000269214_31	chr18:21600674:-	6	0	0	14555.1	3196.94	0	5.12643	4.79008	1.96744	ENST00000269214	31	1	1	10	6	0	0	0	0	0	0	0	ENSPTRT00000018196	553	14	5	11	6	2.72815	0	0.395476	0	0	0.186685	1.90204	ENSMMUT00000018212	59	5	1	12	TRUE	TRUE
ENSMMUT00000017827_39	ENSPTRT00000050319_533	ENST00000360790_64	chr18:22936792:+	6	0	0.5049	0	1.18047	0	0.25667	0.242405	1.43969	ENST00000360790	64	1	2	1	6	0	0	0	0	0	0	0	ENSPTRT00000050319	533	7	7	1	6	0	0	0	0	0	0	0	ENSMMUT00000017827	39	0	1	1	TRUE	TRUE
ENSMMUT00000026644_692	ENSPTRT00000082258_693	ENST00000574538_700	chr18:2567312:-	27	289.964	0	0	711.209	0	0.428382	0.679303	1.74175	ENST00000574538	700	15	15	1	27	0	0	0	0	0	0	0	ENSPTRT00000082258	693	14	14	2	27	0	0	0	0	0	0	0	ENSMMUT00000026644	692	13	13	1	TRUE	TRUE
ENSMMUT00000026644_683	ENSPTRT00000082258_684	ENST00000574538_691	chr18:2567321:-	36	2.23177	0	0	1598.97	0	0.855364	1.44418	2.44383	ENST00000574538	691	10	14	2	36	0	0	0	5.39331	0	0.611866	2.23607	ENSPTRT00000082258	684	8	13	3	36	1.2994	0	0	0	0	0.166681	2.23607	ENSMMUT00000026644	683	8	12	2	TRUE	TRUE
ENSMMUT00000026644_645	ENSPTRT00000082258_642	ENST00000574538_649	chr18:2567363:-	78	0.282579	2.51875	0	31.0098	7.82094	0.770159	2.46865	1.70993	ENST00000574538	649	6	13	3	78	0	0	0	6.45575	0	0.635607	2.23607	ENSPTRT00000082258	642	6	12	4	42	4.15388	0	1.97528	0	0	1.01327	1.50659	ENSMMUT00000026644	645	5	10	4	TRUE	TRUE
ENSMMUT00000026644_639	ENSPTRT00000082258_636	ENST00000574538_643	chr18:2567369:-	84	0.282733	2.51834	0	30.9453	7.81668	0.770204	2.46816	1.70909	ENST00000574538	643	7	12	4	84	0	0	0	6.45202	0	0.635745	2.23607	ENSPTRT00000082258	636	5	11	5	48	4.15307	0	1.97517	0	0	1.01327	1.50655	ENSMMUT00000026644	639	6	9	5	TRUE	TRUE
ENSMMUT00000026644_622	ENSPTRT00000082258_619	ENST00000574538_626	chr18:2567386:-	69	0	3.35566	49.6403	17.2928	11.6989	0.514146	4.76452	1.37109	ENST00000574538	626	2	11	5	69	0	0	0	2.8761	0	0.296164	2.23607	ENSPTRT00000082258	619	10	10	6	81	2.90706	0	1.69286	0	1.75255	1.21788	0.989162	ENSMMUT00000026644	622	4	8	6	TRUE	TRUE
ENSMMUT00000026644_618	ENSPTRT00000082258_615	ENST00000574538_622	chr18:2567390:-	105	0.283273	2.51689	21.3396	30.7217	7.80179	0.770362	4.35303	1.19378	ENST00000574538	622	4	10	6	105	0	0	0	6.43899	0	0.612814	2.23607	ENSPTRT00000082258	615	7	9	7	69	3.23008	0	1.9748	0	1.60696	1.23855	1.01412	ENSMMUT00000026644	618	3	7	7	TRUE	TRUE
ENSMMUT00000026644_529	ENSPTRT00000082258_528	ENST00000574538_535	chr18:2567477:-	21	0	0	0	2.35756	0	2.55455	0.705382	1.55106	ENST00000574538	535	13	9	7	21	0	0	0	0	0	0	0	ENSPTRT00000082258	528	13	8	8	21	0	0	0	0	0	0	0	ENSMMUT00000026644	529	12	6	8	TRUE	TRUE
ENSMMUT00000026644_311	ENSPTRT00000082258_302	ENST00000574538_309	chr18:2571197:-	78	0	2.83656	1.63158	1.57222	0	1.34328	1.17571	0.882572	ENST00000574538	309	12	6	10	78	0	0	2.49527	2.88677	0	0.814067	1.37533	ENSPTRT00000082258	302	3	5	11	78	0	0	0	0	0	0	0	ENSMMUT00000026644	311	11	5	9	TRUE	TRUE
ENSMMUT00000026644_296	ENSPTRT00000082258_287	ENST00000574538_294	chr18:2571212:-	93	5.22969	2.83629	1.63143	1.76816	0	1.86443	2.16447	0.780746	ENST00000574538	294	8	5	11	93	0	0	2.49452	2.88596	0	0.785101	1.37533	ENSPTRT00000082258	287	4	4	12	93	0.0878682	0	0	0	0	0.0139588	2.23607	ENSMMUT00000026644	296	10	4	10	TRUE	TRUE
ENSMMUT00000026644_281	ENSPTRT00000082258_272	ENST00000574538_279	chr18:2571227:-	15	2.98985	0	0	3.53879	0	0	1.52533	1.55739	ENST00000574538	279	9	4	12	15	0	0	0	5020.92	0	1.82928	2.23607	ENSPTRT00000082258	272	2	3	13	15	0	0	12.43	0	0	1.42358	2.23607	ENSMMUT00000026644	281	2	3	11	TRUE	TRUE
ENSMMUT00000026644_211	ENSPTRT00000082258_203	ENST00000574538_210	chr18:2571296:-	24	11.1992	25.5066	0	28.0927	35.1872	53.4578	18.9515	0.728802	ENST00000574538	210	1	2	14	24	0	4.24286	6.45675	28.0751	0	4.06436	1.50823	ENSPTRT00000082258	203	1	1	15	24	0.910225	3.18871	0	5.6718	1.48396	2.62162	0.994242	ENSMMUT00000026644	211	1	2	12	TRUE	TRUE
ENSMMUT00000023434_251	ENSPTRT00000018266_220	ENST00000306851_220	chr18:31684504:-	12	0	0	0	0	0	0.466598	0.340058	2.44949	ENST00000306851	220	1	1	1	12	0	0	13.4506	0.619614	0	1.01019	2.11513	ENSPTRT00000018266	220	1	1	1	12	0	0	0	0	0	0	0	ENSMMUT00000023434	251	0	1	1	TRUE	TRUE
ENSMMUT00000025301_267	ENSPTRT00000018269_250	ENST00000283351_125	chr18:31943004:-	27	0	0	0	356.104	0	25.4364	5.55437	2.2592	ENST00000283351	125	2	2	1	27	0	0	0.89986	1.73324	0	0.489022	1.4792	ENSPTRT00000018269	250	2	2	1	27	1574.93	3.03743	0	0	0	2.44691	2.23069	ENSMMUT00000025301	267	2	3	1	TRUE	TRUE
ENSMMUT00000025301_180	ENSPTRT00000018269_163	ENST00000283351_38	chr18:31943091:-	24	13.45	2.12509	7.458	10.6126	5.24589	7.68915	6.04898	0.510974	ENST00000283351	38	1	1	2	24	0	2.76451	2.5944	0.77451	0	1.4861	1.1125	ENSPTRT00000018269	163	1	1	2	24	3.8966	0	6.60136	0.784986	1.48398	1.67504	1.05417	ENSMMUT00000025301	180	3	2	2	TRUE	TRUE
ENSMMUT00000061728_4	ENSPTRT00000018303_4	ENST00000269195_4	chr18:35654563:+	48	1.60205	0	8.07794	0.885907	1.47601	0.321987	1.50628	1.46246	ENST00000269195	4	3	1	3	36	0	0	1.23696	2.03995	0	0.880817	1.43619	ENSPTRT00000018303	4	1	1	3	97	0.909937	0.792318	0	0	0.429136	0.462445	1.00309	ENSMMUT00000061728	4	2	1	3	TRUE	TRUE
ENSMMUT00000061728_20	ENSPTRT00000018303_20	ENST00000269195_20	chr18:35654579:+	60	1.42767	1.00966	8.4798	3.5276	2.95075	0.961996	2.18766	0.934505	ENST00000269195	20	2	2	2	60	0	0	1.34066	0.991208	0	0.623867	1.3947	ENSPTRT00000018303	20	2	2	2	57	0.713745	1.20099	0	0	0.603181	0.532374	1.01627	ENSMMUT00000061728	20	1	3	1	TRUE	TRUE
ENSMMUT00000026411_121	ENSPTRT00000018310_145	ENST00000590986_132	chr18:36129250:-	30	2.24356	5.27952	5.43838	14.118	42.1436	3.01676	5.34824	1.27444	ENST00000590986	132	1	1	1	30	9.09681	0	6.55613	1.97023	19.8893	6.56168	1.04052	ENSPTRT00000018310	145	1	1	1	30	0.455563	3.98672	0	0	10.2335	2.60943	1.50207	ENSMMUT00000026411	121	1	1	1	TRUE	TRUE
ENSMMUT00000004888_54	ENSPTRT00000050257_21	ENST00000370685_3	chr1:84144273:+	15	0	0	0	0	0	0	0	0	ENST00000370685	3	3	1	3	15	0	0	0.803428	0	0	0.458417	2.23607	ENSPTRT00000050257	21	1	1	3	15	0	2.12676	0	0	0	0.597135	2.23607	ENSMMUT00000004888	54	2	1	2	TRUE	TRUE
ENSMMUT00000004888_133	ENSPTRT00000050257_106	ENST00000370685_88	chr1:84144358:+	4	0	0	0	2397.95	0	0	0.382186	2.44949	ENST00000370685	88	1	3	1	4	0	0	0	0	0	0	0	ENSPTRT00000050257	106	3	3	1	4	2.72956	1.50473	3.75437	1.23927	0.611179	1.83446	0.640671	ENSMMUT00000004888	133	1	2	1	TRUE	TRUE
ENSMMUT00000005034_22	ENSPTRT00000046427_17	ENST00000649336_11	chr18:45967329:-	6	3902.01	0	0	0	0	0	749.594	2.44949	ENST00000649336	11	1	1	1	6	0	0	0	0	0	0	0	ENSPTRT00000046427	17	0	1	1	6	0	0	0	0	0	0	0	ENSMMUT00000005034	22	0	1	1	TRUE	TRUE
ENSMMUT00000002484_15	ENSPTRT00000102399_328	ENST00000269445_420	chr18:49430433:-	12	1.03593	0.598384	0	0	0	0.256621	0.389184	1.34705	ENST00000269445	420	2	2	1	12	0	0	0	0.883381	0.169048	0.209405	1.82063	ENSPTRT00000102399	328	2	2	1	12	1.16983	0	0	1.21092	0	0.327557	1.36965	ENSMMUT00000002484	15	1	1	1	TRUE	TRUE
ENSMMUT00000069201_138	ENSPTRT00000097315_598	ENST00000590208_272	chr18:50281413:-	18	10.8734	4.63965	9.79179	8.38543	0.656488	2.88543	4.70746	0.65922	ENST00000590208	272	2	2	1	18	8.12823	3.68097	6.66329	5.41949	1.93325	5.24789	0.471638	ENSPTRT00000097315	598	2	5	1	18	1.72392	3.6804	2.52403	1.09968	4.19429	2.81613	0.49026	ENSMMUT00000069201	138	1	1	1	TRUE	TRUE
ENSMMUT00000070757_411	ENSPTRT00000018403_656	ENST00000342988_426	chr18:51046934:+	3	0	0	0	1.77066	0	0	0.136756	2.44949	ENST00000342988	426	2	2	1	90	0	0	0.239718	1.93346	0.784274	0.629616	1.37907	ENSPTRT00000018403	656	3	3	1	90	1.49787	0	0.936086	0	0	0.277898	1.4288	ENSMMUT00000070757	411	1	1	1	TRUE	TRUE
ENSMMUT00000018117_213	ENSPTRT00000018426_211	ENST00000254442_173	chr18:56651557:+	9	0	0	0	10.5929	0.984631	3.07706	1.90674	1.70643	ENST00000254442	173	2	1	2	9	0	5.79116	0.140868	0	11.1267	1.64757	1.45936	ENSPTRT00000018426	211	2	1	2	9	2699.17	0.443403	0	0	3.21495	1.35597	2.23229	ENSMMUT00000018117	213	2	1	2	TRUE	TRUE
ENSMMUT00000018117_218	ENSPTRT00000018426_216	ENST00000254442_178	chr18:56651562:+	12	10403.7	0	0	7.05637	0	2.05137	3.94599	2.44692	ENST00000254442	178	1	2	1	12	3.23197	3.08916	0.96398	35.3673	0	4.66372	1.76612	ENSPTRT00000018426	216	1	2	1	12	9613.21	0	0	0	2.75563	1.98836	2.23527	ENSMMUT00000018117	218	1	2	1	TRUE	TRUE
ENSMMUT00000059234_80	ENSPTRT00000018431_378	ENST00000256854_17	chr18:57621820:-	48	0.401104	1.5532	0	2.06436	0	0.684174	0.710606	1.08511	ENST00000256854	17	1	1	1	48	0	0.291314	0.167752	0	0	0.151599	1.44962	ENSPTRT00000018431	378	2	4	1	70	0.496502	1.32972	1.47536	0.616086	0.619311	0.932053	0.504311	ENSMMUT00000059234	80	2	2	1	TRUE	TRUE
ENSMMUT00000009287_502	ENSPTRT00000018439_117	ENST00000361673_251	chr18:58628841:-	75	0	0	0	0	0	0	0	0	ENST00000361673	251	0	8	2	51	0	0	0.625427	0	0	0.0802812	2.23607	ENSPTRT00000018439	117	2	2	2	51	0	0	0	0	0	0	0	ENSMMUT00000009287	502	7	7	1	TRUE	TRUE
ENSMMUT00000009287_398	ENSPTRT00000018439_9	ENST00000361673_143	chr18:58628949:-	36	0	0	0	0	0	0	0	0	ENST00000361673	143	0	5	5	36	0.754346	0	1.12447	0	0	0.430067	1.4129	ENSPTRT00000018439	9	1	1	3	36	0	0	0	0	0	0	0	ENSMMUT00000009287	398	6	6	2	TRUE	TRUE
ENSMMUT00000074068_1105	ENSPTRT00000088460_168	ENST00000398117_1344	chr18:63318785:-	36	1.38928	0.26935	0	0.253681	0.537299	0.237689	0.417043	1.09772	ENST00000398117	1344	8	11	1	36	0	0.772769	0.322367	0	1.92377	0.472296	1.32995	ENSPTRT00000088460	168	2	3	1	36	0.780086	0	0	0	0.645488	0.227688	1.37944	ENSMMUT00000074068	1105	6	7	1	TRUE	TRUE
ENSMMUT00000074068_1041	ENSPTRT00000088460_104	ENST00000398117_1280	chr18:63318849:-	84	2.56383	0.741848	0	3.83308	0.259624	0.596697	0.927574	1.14238	ENST00000398117	1280	5	10	2	84	1.85255	0.639796	6.24685	0.413117	1.26569	0.842024	1.1491	ENSPTRT00000088460	104	1	2	2	84	2.38337	1.23467	0.959826	0.914744	0.78867	1.17024	0.518021	ENSMMUT00000074068	1041	1	6	2	TRUE	TRUE
ENSMMUT00000074068_993	ENSPTRT00000088460_56	ENST00000398117_1232	chr18:63318897:-	9	0.187103	0.683473	1.77063	1.44285	0.294274	0.230609	0.563547	0.886477	ENST00000398117	1232	6	9	3	9	0	0	0.749823	0.359087	0	0.247269	1.50433	ENSPTRT00000088460	56	3	1	3	9	0.260008	0.0229667	0	0	0	0.0499552	2.01688	ENSMMUT00000074068	993	7	5	3	TRUE	TRUE
ENSMMUT00000032779_106	ENSPTRT00000018545_37	ENST00000169551_19	chr18:74148541:+	18	1.3466	2.98453	0.529494	0.644144	1.81738	1.70999	1.46404	0.597598	ENST00000169551	19	1	1	6	18	0	0	0.947065	1.84684	0.675238	0.824815	1.10629	ENSPTRT00000018545	37	2	1	5	18	1.39968	0	0.836949	2.80243	0.927677	0.934267	0.864113	ENSMMUT00000032779	106	2	2	5	TRUE	TRUE
ENSMMUT00000032779_255	ENSPTRT00000018545_192	ENST00000169551_174	chr18:74148696:+	6	0	0	0	0	0	0.641369	0.158063	2.44949	ENST00000169551	174	5	4	3	6	2.80142	0	0.749786	0	2.45941	0.857568	1.11864	ENSPTRT00000018545	192	1	3	3	6	2.22396	0	2.23933	0	1.48418	1.23782	0.948243	ENSMMUT00000032779	255	1	4	3	TRUE	TRUE
ENSMMUT00000032779_260	ENSPTRT00000018545_197	ENST00000169551_179	chr18:74148701:+	6	0	0	0	0.221458	2.21508	0.855104	0.647555	1.60593	ENST00000169551	179	2	5	2	6	0	0	0.692118	0	0	0.157594	2.23607	ENSPTRT00000018545	197	5	4	2	6	0.20236	0	0	0	0	0.0277758	2.23607	ENSMMUT00000032779	260	5	5	2	TRUE	TRUE
ENSMMUT00000032779_296	ENSPTRT00000018545_233	ENST00000169551_215	chr18:74148737:+	18	0	0	0	0.186685	0	0.675164	0.147951	1.88586	ENST00000169551	215	6	6	1	18	1.20068	0	0	1.18265	0	0.333027	1.36937	ENSPTRT00000018545	233	4	5	1	39	0.202718	0	0	0	0.989509	0.413879	1.79888	ENSMMUT00000032779	296	3	6	1	TRUE	TRUE
ENSMMUT00000058631_74	ENSPTRT00000018591_554	ENST00000397778_106	chr18:79950993:-	42	6.72591	6.55749	10.4322	45.6942	15.0766	13.817	11.4142	0.902273	ENST00000397778	106	1	1	1	42	6.63112	4.47431	22.214	4.87389	5.15114	6.59608	0.878506	ENSPTRT00000018591	554	1	2	1	42	2.02058	3.56493	0	2.35389	5.72098	2.98211	0.770837	ENSMMUT00000058631	74	1	1	1	TRUE	TRUE
ENSMMUT00000073948_3500	ENSPTRT00000051013_5109	ENST00000640258_695	chr1:89579592:+	63	37.4956	12.0796	0	33.2698	4262.5	7.65	22.0013	2.38847	ENST00000640258	695	1	9	2	63	0	0.869411	2.8087	0	3.53865	1.58985	1.13582	ENSPTRT00000051013	5109	1	107	2	63	8.80771	4.42632	4.6301	4.06193	5.28288	5.12435	0.355247	ENSMMUT00000073948	3500	2	58	2	TRUE	TRUE
ENSMMUT00000073948_3518	ENSPTRT00000051013_5127	ENST00000640258_713	chr1:89579610:+	45	37.6821	12.0899	0	31.62	4857.13	11.4665	21.6678	2.39441	ENST00000640258	713	2	10	1	45	0	0.86936	1.53292	0	4.04516	1.24213	1.29506	ENSPTRT00000051013	5127	2	108	1	45	8.81095	4.4281	5.09409	4.43177	4.44984	5.16343	0.349846	ENSMMUT00000073948	3518	1	59	1	TRUE	TRUE
ENSMMUT00000064393_268	ENSPTRT00000095468_211	ENST00000356663_68	chr19:1021056:-	42	0	0.0810549	0	1.57306	0.315438	0.549915	0.28477	1.43878	ENST00000356663	68	2	2	1	42	2.16255	1.09662	1.81358	0	0	1.00166	0.98833	ENSPTRT00000095468	211	2	2	1	42	1.81833	15.2533	2.22162	11.9126	1.40589	4.98817	1.00563	ENSMMUT00000064393	268	1	5	1	TRUE	TRUE
ENSMMUT00000064393_214	ENSPTRT00000095468_157	ENST00000356663_14	chr19:1021110:-	27	2.67854	0.936509	0	2.60876	3.72662	4.81852	2.45781	0.717812	ENST00000356663	14	1	1	2	27	0.606204	1.82986	1.59311	1.74848	2.46318	1.74431	0.406562	ENSPTRT00000095468	157	1	1	2	27	1.25295	2.89788	1.47394	0.370676	1.2755	1.38272	0.627539	ENSMMUT00000064393	214	4	4	2	TRUE	TRUE
ENSMMUT00000059564_158	ENSPTRT00000076231_59	ENST00000588790_387	chr19:11346546:+	61	2.8552	4.47879	0	2.70603	5.73976	2.79681	3.45547	0.626068	ENST00000588790	387	2	7	1	61	2.47931	2.70204	3.86786	3.24975	5.05762	3.0799	0.298632	ENSPTRT00000076231	59	1	3	1	61	1.89821	0	1.40758	0	2.22286	1.15761	0.949856	ENSMMUT00000059564	158	1	2	1	TRUE	TRUE
ENSMMUT00000031233_262	ENSPTRT00000101201_305	ENST00000591608_154	chr19:11356880:+	84	0	0	0	0	446.971	0	1.14314	2.44949	ENST00000591608	154	1	1	2	84	0	0	0	0	0	0	0	ENSPTRT00000101201	305	5	5	2	84	1.98299	1.70749	6.15564	1.80956	0	2.54128	0.979229	ENSMMUT00000031233	262	1	2	2	TRUE	TRUE
ENSMMUT00000031233_323	ENSPTRT00000101201_366	ENST00000591608_215	chr19:11356941:+	50	0	0	0	0	0	0	0	0	ENST00000591608	215	2	2	1	50	0	0	0	0	0	0	0	ENSPTRT00000101201	366	6	6	1	50	1.0398	2.38996	4.40105	0	0	1.76206	1.19017	ENSMMUT00000031233	323	2	3	1	TRUE	TRUE
ENSMMUT00000058219_126	ENSPTRT00000094697_710	ENST00000591090_65	chr19:12737468:+	38	0	4.01773	25.9403	0	0	0	3.03667	2.08033	ENST00000591090	65	1	1	1	38	0	0	0	0	0	0	0	ENSPTRT00000094697	710	12	14	1	38	0	0	0	0	0	0	0	ENSMMUT00000058219	126	0	6	1	TRUE	TRUE
ENSMMUT00000059099_254	ENSPTRT00000019458_365	ENST00000586534_22	chr19:12945883:+	15	4.14721	4.34044	2.17634	7.55029	12.7359	5.17361	6.24509	0.618194	ENST00000586534	22	1	1	2	15	0.549395	1.18043	3.20492	2.79285	2.02546	2.03957	0.564209	ENSPTRT00000019458	365	4	6	2	15	3.40201	1.44537	1.84678	5.2134	1.36055	2.50772	0.621948	ENSMMUT00000059099	254	1	5	2	TRUE	TRUE
ENSMMUT00000059099_274	ENSPTRT00000019458_385	ENST00000586534_42	chr19:12945903:+	46	0.34246	0.0374698	0	0.127759	0.254163	0.29275	0.212398	0.804364	ENST00000586534	42	2	2	1	46	0	0.0744516	0.0440337	0.349214	0.194308	0.118301	1.06503	ENSPTRT00000019458	385	5	7	1	46	0	0	0.130938	0	0	0.0332751	2.23607	ENSMMUT00000059099	274	3	6	1	TRUE	TRUE
ENSMMUT00000070962_101	ENSPTRT00000019477_444	ENST00000586600_319	chr19:13751624:+	33	0	0	0	0.273113	0.394096	0.684292	0.246574	1.24581	ENST00000586600	319	2	3	2	33	1.16731	0	0	0	0	0.18185	2.23607	ENSPTRT00000019477	444	4	3	2	33	0.53097	0	0	0	0	0.158804	2.23607	ENSMMUT00000070962	101	1	1	1	TRUE	TRUE
ENSMMUT00000062504_53	ENSPTRT00000018727_2	ENST00000593052_8	chr19:1438426:+	128	0	3.57654	5.20339	0.885851	0.616349	5.60493	1.77722	0.930934	ENST00000593052	8	1	1	1	131	0	0.431846	0.375556	0.524925	0.0355845	0.302018	0.876696	ENSPTRT00000018727	2	1	1	1	131	0.394687	0.623533	0.305694	1.54134	0.371515	0.632502	0.793871	ENSMMUT00000062504	53	1	1	1	TRUE	TRUE
ENSMMUT00000030098_531	ENSPTRT00000086689_15	ENST00000263377_209	chr19:15273113:-	14	0.961964	3.72745	0.932785	4.42258	6.46684	1.99493	2.64734	0.709808	ENST00000263377	209	6	6	1	14	0	0	0	0.971981	0	0.155701	2.23607	ENSPTRT00000086689	15	2	2	1	14	2.2943	1.59551	1.1115	0	0	0.960239	1.00501	ENSMMUT00000030098	531	2	11	1	TRUE	TRUE
ENSMMUT00000030098_526	ENSPTRT00000086689_10	ENST00000263377_204	chr19:15273118:-	6	7.18036	6.05743	5.6581	10.6177	12.7962	4.03067	6.24923	0.429747	ENST00000263377	204	1	5	2	6	1.06585	0.338078	0.624828	3.0973	0	0.950709	1.19251	ENSPTRT00000086689	10	1	1	2	6	4.00321	3.19077	14.9351	0	0	3.15872	1.38974	ENSMMUT00000030098	526	1	10	2	TRUE	TRUE
ENSMMUT00000009260_43	ENSPTRT00000097084_312	ENST00000255641_290	chr19:1969550:+	84	1.0385	0	0	0.685787	0.768625	0.874592	0.644806	0.80256	ENST00000255641	290	2	3	2	84	2.15469	0.271044	0.048367	0.534404	3.51907	0.863315	1.14039	ENSPTRT00000097084	312	2	2	3	84	0.9293	0.353443	0.439313	0.56943	2.54893	0.831924	0.940639	ENSMMUT00000009260	43	2	1	3	TRUE	TRUE
ENSMMUT00000009260_167	ENSPTRT00000097084_436	ENST00000255641_414	chr19:1969674:+	9	0	0	0	0.590324	0.27356	0.223164	0.164668	1.29721	ENST00000255641	414	4	4	1	9	0	0	0	0.120509	0	0.0219422	2.23607	ENSPTRT00000097084	436	4	4	1	9	0	0	0	0	0	0	0	ENSMMUT00000009260	167	3	3	1	TRUE	TRUE
ENSMMUT00000007155_59	ENSPTRT00000001816_225	ENST00000370310_21	chr1:92961442:-	13	0	1.51419	15.2122	0	0	0.641691	1.11913	2.09476	ENST00000370310	21	1	1	1	13	15.7254	0	0	2414.42	0	2.13412	2.21803	ENSPTRT00000001816	225	1	1	1	13	0.90999	0	0	0	0	0.142812	2.23607	ENSMMUT00000007155	59	1	1	1	TRUE	TRUE
ENSMMUT00000025926_125	ENSPTRT00000019966_116	ENST00000392271_119	chr19:29942357:+	12	7803.02	32.275	11644.3	3196.94	14049.1	26115.5	93.2983	0.883298	ENST00000392271	119	1	1	2	177	15.3094	0	21.4078	0.929865	30.6009	8.70022	0.968056	ENSPTRT00000019966	116	2	1	2	12	3542.34	4669.03	0	8246.45	0	27.3781	1.05439	ENSMMUT00000025926	125	1	1	2	TRUE	TRUE
ENSMMUT00000025926_138	ENSPTRT00000019966_130	ENST00000392271_132	chr19:29942370:+	162	18.6892	16.5446	41.8228	35.9004	70.1109	23.5788	28.0895	0.582926	ENST00000392271	132	2	2	1	144	15.3912	0	21.6016	0.929752	30.7459	8.7319	0.967779	ENSPTRT00000019966	130	1	2	1	168	29.2166	14.1708	18.7063	29.178	12.6332	18.8127	0.385008	ENSMMUT00000025926	138	2	2	1	TRUE	TRUE
ENSMMUT00000023951_528	ENSPTRT00000018834_622	ENST00000246117_20	chr19:3185949:+	12	8.95068	52.2779	10188.9	11985.8	17.6599	19586.9	78.7298	1.18139	ENST00000246117	20	1	1	1	12	0	7.33362	20.2086	33.5405	123.114	24.4265	1.35443	ENSPTRT00000018834	622	1	6	1	12	13.3304	1.32874	11582.3	15.6785	16112	24.2394	1.39699	ENSMMUT00000023951	528	1	6	4	TRUE	TRUE
ENSMMUT00000015160_91	ENSPTRT00000043131_164	ENST00000342179_143	chr19:32406267:+	36	0	0	0	0	0	1741.97	3.03379	2.44949	ENST00000342179	143	1	1	3	36	0	4.10792	0	12.862	0	2.3232	1.64517	ENSPTRT00000043131	164	1	1	3	36	2.72042	0	0	0	0	0.896111	2.23607	ENSMMUT00000015160	91	1	1	3	TRUE	TRUE
ENSMMUT00000015160_144	ENSPTRT00000043131_217	ENST00000342179_196	chr19:32408234:+	20	0	0	0	0	1874.08	0.733175	1.52489	2.44834	ENST00000342179	196	2	2	2	20	0	0	0.450509	0.929322	0	0.45864	1.50043	ENSPTRT00000043131	217	2	2	2	20	0	0	0	0	0.371957	0.0948091	2.23607	ENSMMUT00000015160	144	2	2	2	TRUE	TRUE
ENSMMUT00000015160_148	ENSPTRT00000043131_221	ENST00000342179_200	chr19:32408238:+	6	0	0	0	0	0	0	0	0	ENST00000342179	200	3	3	1	6	0	0	0	1.0841	0	0.366615	2.23607	ENSPTRT00000043131	221	3	3	1	12	0	0	0	0	0.3716	0.0941808	2.23607	ENSMMUT00000015160	148	3	3	1	TRUE	TRUE
ENSMMUT00000011250_111	ENSPTRT00000019978_130	ENST00000306065_97	chr19:32675084:-	6	0	0	0	1.1804	0	0.427634	0.229169	1.78576	ENST00000306065	97	3	3	1	6	0	0	0.56241	0.127651	2.50199	0.471395	1.67148	ENSPTRT00000019978	130	3	3	1	6	0	0	0	0	0	0	0	ENSMMUT00000011250	111	3	3	1	TRUE	TRUE
ENSMMUT00000011250_102	ENSPTRT00000019978_122	ENST00000306065_89	chr19:32675092:-	36	1.30904	0.323448	0	2.35506	0.984627	0.171342	0.572661	1.03736	ENST00000306065	89	2	2	2	36	0	0.024335	0.214618	2.16785	1.28889	0.506922	1.29695	ENSPTRT00000019978	122	2	2	2	15	0	0	0	0	0	0	0	ENSMMUT00000011250	102	2	2	2	TRUE	TRUE
ENSMMUT00000011250_91	ENSPTRT00000019978_111	ENST00000306065_78	chr19:32675103:-	15	4.2632	13.9959	97.4	15.9166	6.68996	2.27986	7.88632	1.56413	ENST00000306065	78	1	1	3	15	0.100197	1.63611	4.21552	2.2954	3.64539	1.94321	0.688541	ENSPTRT00000019978	111	1	1	3	15	7.01538	0.504464	0	0.336504	0	0.59403	1.94186	ENSMMUT00000011250	91	1	1	3	TRUE	TRUE
ENSMMUT00000008228_1716	ENSPTRT00000020010_1044	ENST00000299505_172	chr19:34299772:+	72	0	0	0	267.328	3.90545	0.322651	0.57916	2.40396	ENST00000299505	172	4	1	6	72	0	4.21849	1.04958	9.08655	0	2.86104	1.35186	ENSPTRT00000020010	1044	1	24	9	72	5.3652	0	0	10.5776	0	1.13125	1.48628	ENSMMUT00000008228	1716	4	44	8	TRUE	TRUE
ENSMMUT00000008228_1754	ENSPTRT00000020010_1082	ENST00000299505_210	chr19:34299810:+	69	0	0	0	278.908	362.948	0	0.540568	1.56899	ENST00000299505	210	5	2	5	69	0	2.01891	2.24556	7.4763	0	2.47393	1.30298	ENSPTRT00000020010	1082	2	25	8	69	264.951	0	0	7.95018	2.59485	2.20797	2.1299	ENSMMUT00000008228	1754	1	45	7	TRUE	TRUE
ENSMMUT00000008228_2155	ENSPTRT00000020010_1486	ENST00000299505_614	chr19:34300214:+	69	0	0	0	1.17901	0	0.234775	0.214325	2.00145	ENST00000299505	614	6	3	4	69	0	0	0	0	0	0	0	ENSPTRT00000020010	1486	9	29	4	69	5.42888	0	0	0	0	0.499041	2.23607	ENSMMUT00000008228	2155	5	48	4	TRUE	TRUE
ENSMMUT00000008228_2275	ENSPTRT00000020010_1604	ENST00000299505_732	chr19:34300332:+	72	0	0	0	27.6247	0	1.28179	1.46246	2.32159	ENST00000299505	732	1	4	3	72	0	0	0	1.20402	0	0.177935	2.23607	ENSPTRT00000020010	1604	4	30	3	72	0.405826	0	0	0	0	0.0931609	2.23607	ENSMMUT00000008228	2275	8	49	3	TRUE	TRUE
ENSMMUT00000008228_2290	ENSPTRT00000020010_1619	ENST00000299505_747	chr19:34300347:+	57	0	0	0	24.3006	0	0.642145	1.09842	2.37462	ENST00000299505	747	3	5	2	57	0	0	0	0	0	0	0	ENSPTRT00000020010	1619	10	31	2	57	0.40553	0	0	0	0	0.0954758	2.23607	ENSMMUT00000008228	2290	7	50	2	TRUE	TRUE
ENSMMUT00000008228_2296	ENSPTRT00000020010_1625	ENST00000299505_753	chr19:34300353:+	51	0	0	0	24.3513	0	0.642057	1.09847	2.37478	ENST00000299505	753	2	6	1	51	0	0	0	0	0	0	0	ENSPTRT00000020010	1625	11	32	1	51	0.405411	0	0	0	0	0.0983058	2.23607	ENSMMUT00000008228	2296	6	51	1	TRUE	TRUE
ENSMMUT00000009033_166	ENSPTRT00000066710_1157	ENST00000329285_143	chr19:34773073:-	135	6.24395	7.90712	0	3.50005	7.59603	27.0655	8.97444	1.08555	ENST00000329285	143	1	1	1	135	50.1723	11.856	389.405	25.4488	19.33	22.846	1.64085	ENSPTRT00000066710	1157	1	15	1	135	270.817	0	0	0	30.0552	6.53982	1.96877	ENSMMUT00000009033	166	1	2	1	TRUE	TRUE
ENSMMUT00000072711_1	ENSPTRT00000020070_1955	ENST00000085219_3	chr19:35329189:+	64	0.342062	0.590283	0.486415	0.860608	0.688477	0.446492	0.471043	0.326963	ENST00000085219	3	1	1	1	159	0.15381	0.358361	0.589243	0.578422	0.792679	0.459673	0.494862	ENSPTRT00000020070	1955	6	11	2	64	0	0	0	0	0	0	0	ENSMMUT00000072711	1	0	1	1	TRUE	TRUE
ENSMMUT00000020909_103	ENSPTRT00000046470_171	ENST00000357898_283	chr1:9355845:+	33	0	0	0	0	0	0	0	0	ENST00000357898	283	0	2	1	33	0	0	0	0	0	0	0	ENSPTRT00000046470	171	0	1	1	33	0	0	0	0	0	0	0	ENSMMUT00000020909	103	0	1	1	TRUE	TRUE
ENSMMUT00000077031_62	ENSPTRT00000020162_149	ENST00000401500_46	chr19:36054942:+	6	0	0	0	1598.97	0	7.68259	2.03286	2.43546	ENST00000401500	46	1	1	1	6	0	0	0	0	0	0	0	ENSPTRT00000020162	149	0	1	1	6	10.901	0	0	0	0	0.526745	2.23607	ENSMMUT00000077031	62	1	1	1	TRUE	TRUE
[truncated: 14,017 more rows]

## Sheet: Fig8B
Tissue	rho
brain	0.63
liver	0.61
testis	0.63

## Sheet: Fig8C
Tissue	rho
brain	0.55
liver	0.8
testis	0.79

## Sheet: Fig8D
Tissue	Gene_class	Abs_log2Beta_CDS
brain	No	0.109564
brain	No	0.35542
[truncated: 13,623 more rows]

## Sheet: Fig8E
Tissue	Gene_class	Gene_id
[truncated: 13,625 more rows]

[truncated: 1 more sheets: Fig8F]
