# Supplementary material for: Upstream open reading frames buffer translational variability during Drosophila evolution and development
Source: eLife. 2025 Jun 6;14:RP104074. doi: 10.7554/eLife.104074 (PMC12143884; doi:10.7554/eLife.104074)
Supplement: Table 1—source data 1. [file elife-104074-table1-data1.xlsx]

## Sheet: Table1_Source_Data_1
transcript_id	uORF_id	log2Beta_uorf	adj_P_log2Beta_uorf	log2Gamma	adj_P_log2Gamma	stages
FBtr0006151	FBtr0006151_1039	1.25436	0.746961	-0.194048	0.991462	em02
FBtr0006151	FBtr0006151_1048	1.94671	0.595893	-0.886404	0.930337	em02
FBtr0006151	FBtr0006151_1060	1.44894	0.724401	-0.388629	0.978107	em02
FBtr0070026	FBtr0070026_78	-1.45062	0.275285	0.833303	0.742946	em02
FBtr0070028	FBtr0070028_236	0.186284	0.725005	-2.04166	1.60668e-06	em02
FBtr0070028	FBtr0070028_388	1.22832	0.00131987	-3.08369	7.43412e-13	em02
FBtr0070028	FBtr0070028_394	1.25008	0.00173745	-3.10545	1.80089e-12	em02
FBtr0070028	FBtr0070028_60	-1.36385	0.120913	-0.491518	0.807467	em02
FBtr0070045	FBtr0070045_35	-0.374751	0.758749	1.05263	0.502973	em02
FBtr0070079	FBtr0070079_96	2.1858	0.781956	-3.05576	0.80699	em02
FBtr0070091	FBtr0070091_146	3.52977	0.037865	0.543014	0.914286	em02
FBtr0070103	FBtr0070103_138	-0.621521	0.908133	-1.40072	0.875047	em02
FBtr0070103	FBtr0070103_238	-6.30579	0.043627	4.28355	0.383115	em02
FBtr0070103	FBtr0070103_308	-1.39902	0.837247	-0.623217	0.970943	em02
FBtr0070110	FBtr0070110_11	1.60079	0.853001	0.492757	0.982992	em02
FBtr0070110	FBtr0070110_147	4.6283	0.352443	-2.53476	0.80192	em02
FBtr0070110	FBtr0070110_29	1.60079	0.853001	0.492757	0.982992	em02
FBtr0070123	FBtr0070123_106	0.727888	0.525803	-1.16032	0.475477	em02
FBtr0070140	FBtr0070140_116	-1.69614	0.0332744	0.717876	0.653519	em02
FBtr0070146	FBtr0070146_208	-0.816284	0.267993	-0.322624	0.858376	em02
FBtr0070146	FBtr0070146_242	-1.26479	0.0544196	0.125882	0.95722	em02
FBtr0070146	FBtr0070146_36	-3.647	0.00153301	2.50809	0.125248	em02
FBtr0070146	FBtr0070146_470	-2.73947	9.0701e-06	1.60056	0.0824594	em02
FBtr0070151	FBtr0070151_241	-2.37562	1.20528e-05	1.19535	0.159719	em02
FBtr0070151	FBtr0070151_247	-2.10485	0.000200879	0.924576	0.344629	em02
FBtr0070151	FBtr0070151_380	-0.702488	0.353475	-0.477784	0.743582	em02
FBtr0070151	FBtr0070151_429	0.271477	0.542666	-1.45175	0.00104907	em02
FBtr0070167	FBtr0070167_168	-3.33111	0.000190396	3.53675	0.000702795	em02
FBtr0070167	FBtr0070167_489	2.06032	0.591274	-1.85468	0.781072	em02
FBtr0070174	FBtr0070174_15	2.04349	0.815174	2.52314	0.875047	em02
FBtr0070176	FBtr0070176_49	2.30869	0.0680207	-2.32111	0.16601	em02
FBtr0070176	FBtr0070176_57	1.89038	0.2946	-1.90279	0.473075	em02
FBtr0070176	FBtr0070176_87	0.256551	0.811792	-0.268963	0.89233	em02
FBtr0070182	FBtr0070182_108	0.391951	0.540664	-0.136687	0.936762	em02
FBtr0070182	FBtr0070182_126	-0.480262	0.566085	0.735526	0.542515	em02
FBtr0070209	FBtr0070209_191	-2.60794	0.324705	2.09394	0.638687	em02
FBtr0070209	FBtr0070209_247	1.90574	0.146352	-2.41974	0.150887	em02
FBtr0070209	FBtr0070209_97	-1.24178	0.348695	0.727785	0.786669	em02
FBtr0070235	FBtr0070235_141	-2.56643	0.00932936	1.50829	0.328687	em02
FBtr0070235	FBtr0070235_248	-2.0612	5.09374e-05	1.00306	0.212103	em02
FBtr0070235	FBtr0070235_272	-2.2726	4.49279e-05	1.21446	0.150662	em02
FBtr0070245	FBtr0070245_72	1.64525	0.50453	-1.2544	0.788998	em02
FBtr0070253	FBtr0070253_53	-2.96723	0.430849	2.62823	0.71625	em02
FBtr0070259	FBtr0070259_271	-0.946094	0.375043	0.225737	0.938481	em02
FBtr0070260	FBtr0070260_18	0.626365	0.452696	-0.748945	0.597375	em02
FBtr0070260	FBtr0070260_242	-1.19558	0.0253977	1.073	0.224521	em02
FBtr0070260	FBtr0070260_46	0.967729	0.386725	-1.09031	0.537376	em02
FBtr0070270	FBtr0070270_124	0.594638	0.699446	-0.466264	0.879351	em02
FBtr0070270	FBtr0070270_210	1.15986	0.173722	-1.03149	0.446694	em02
FBtr0070270	FBtr0070270_246	1.31425	0.252008	-1.18587	0.516348	em02
FBtr0070270	FBtr0070270_264	0.0526104	0.98465	0.0757633	0.992219	em02
FBtr0070270	FBtr0070270_270	0.0438583	0.985974	0.0845155	0.991562	em02
FBtr0070279	FBtr0070279_122	0.0359785	0.987837	-0.70272	0.839467	em02
FBtr0070279	FBtr0070279_203	-0.810931	0.210172	0.14419	0.941621	em02
FBtr0070279	FBtr0070279_291	-3.23195	0.0338484	2.56521	0.235667	em02
FBtr0070283	FBtr0070283_121	0.671284	0.323269	-1.36631	0.0935612	em02
FBtr0070289	FBtr0070289_74	-5.9539	0.0020157	6.05188	0.0139623	em02
FBtr0070289	FBtr0070289_81	-3.62144	0.013309	3.71942	0.0655567	em02
FBtr0070293	FBtr0070293_159	3.31511	0.267225	-3.56821	0.469684	em02
FBtr0070293	FBtr0070293_347	1.079	0.735169	-1.3321	0.836009	em02
FBtr0070308	FBtr0070308_29	-1.47926	0.20843	1.83906	0.230866	em02
FBtr0070313	FBtr0070313_203	2.23825	0.381122	-2.14718	0.597535	em02
FBtr0070313	FBtr0070313_88	2.90826	0.195013	-2.81719	0.379482	em02
FBtr0070314	FBtr0070314_28	1.16724	0.517732	-1.83862	0.43269	em02
FBtr0070316	FBtr0070316_127	-1.19267	0.691455	1.2575	0.806221	em02
FBtr0070316	FBtr0070316_337	-2.58811	0.196176	2.65294	0.342886	em02
FBtr0070316	FBtr0070316_97	-1.00679	0.639472	1.07161	0.7626	em02
FBtr0070317	FBtr0070317_223	0.0472955	0.957744	-0.593445	0.485376	em02
FBtr0070317	FBtr0070317_286	-0.764383	0.221308	0.218234	0.895321	em02
FBtr0070317	FBtr0070317_84	-1.1413	0.211882	0.595148	0.743062	em02
FBtr0070318	FBtr0070318_30	0.280456	0.637354	-0.845533	0.204692	em02
FBtr0070330	FBtr0070330_112	0.77079	0.918538	0.588346	0.973757	em02
FBtr0070330	FBtr0070330_132	1.40815	0.874591	-0.0490162	0.998928	em02
FBtr0070330	FBtr0070330_253	-0.399084	0.972977	1.75822	0.927289	em02
FBtr0070330	FBtr0070330_657	-1.93963	0.456956	3.29876	0.301623	em02
FBtr0070330	FBtr0070330_764	1.33893	0.10865	0.0202099	0.997737	em02
FBtr0070340	FBtr0070340_107	2.62842	0.726287	-1.17506	0.946517	em02
FBtr0070345	FBtr0070345_75	-0.951861	0.206162	0.159299	0.944781	em02
FBtr0070345	FBtr0070345_78	-0.972702	0.202351	0.180139	0.936982	em02
FBtr0070345	FBtr0070345_83	-1.17009	0.0666572	0.377529	0.804934	em02
FBtr0070346	FBtr0070346_158	-1.54246	0.520015	1.18543	0.79062	em02
FBtr0070346	FBtr0070346_164	-1.0733	0.158902	0.716269	0.63122	em02
FBtr0070346	FBtr0070346_34	1.87323	0.063639	-2.23027	0.0951899	em02
FBtr0070363	FBtr0070363_49	-1.78925	0.0613712	1.31558	0.372551	em02
FBtr0070369	FBtr0070369_78	3.78037	0.332932	-3.94858	0.492429	em02
FBtr0070381	FBtr0070381_60	2.24471	0.346386	-1.7771	0.665597	em02
FBtr0070381	FBtr0070381_64	3.14515	0.182489	-2.67754	0.456422	em02
FBtr0070389	FBtr0070389_37	-1.27979	0.450685	-0.476049	0.904802	em02
FBtr0070393	FBtr0070393_470	-0.749609	0.766768	-0.110838	0.991147	em02
FBtr0070401	FBtr0070401_435	-0.105142	0.908472	-0.410557	0.732616	em02
FBtr0070401	FBtr0070401_461	-0.296874	0.696232	-0.218825	0.888276	em02
FBtr0070401	FBtr0070401_54	0.386322	0.823137	-0.902022	0.691298	em02
FBtr0070401	FBtr0070401_551	-1.35727	0.20597	0.841573	0.669649	em02
FBtr0070405	FBtr0070405_73	1.9932	0.218512	-3.00609	0.128095	em02
FBtr0070406	FBtr0070406_721	3.53941	0.28227	-0.683719	0.946647	em02
FBtr0070408	FBtr0070408_167	1.00463	0.807939	-1.71914	0.779909	em02
FBtr0070412	FBtr0070412_190	1.66811	2.64923e-12	-1.90581	1.05929e-05	em02
FBtr0070412	FBtr0070412_385	1.87375	3.02638e-08	-2.11144	4.02632e-05	em02
FBtr0070412	FBtr0070412_69	0.163324	0.754824	-0.40102	0.68029	em02
FBtr0070414	FBtr0070414_242	0.984222	0.296344	-1.48653	0.210086	em02
FBtr0070414	FBtr0070414_350	0.6915	0.361422	-1.19381	0.207116	em02
FBtr0070414	FBtr0070414_376	0.330841	0.740811	-0.833149	0.503651	em02
FBtr0070414	FBtr0070414_44	0.927402	0.0725785	-1.42971	0.0282846	em02
FBtr0070414	FBtr0070414_62	0.779504	0.236877	-1.28181	0.1216	em02
FBtr0070419	FBtr0070419_62	1.3184	0.333314	-1.07103	0.642217	em02
FBtr0070429	FBtr0070429_305	-2.10958	0.122742	1.52292	0.49886	em02
FBtr0070429	FBtr0070429_308	-5.42667	0.0116567	4.84001	0.0890006	em02
FBtr0070429	FBtr0070429_393	-1.85173	0.0273742	1.26507	0.351312	em02
FBtr0070429	FBtr0070429_405	-1.65504	0.0832931	1.06838	0.526652	em02
FBtr0070429	FBtr0070429_540	-1.7286	4.49449e-06	1.14194	0.0770761	em02
FBtr0070429	FBtr0070429_566	-0.451577	0.801147	-0.135083	0.978626	em02
FBtr0070429	FBtr0070429_628	-2.08114	9.14068e-06	1.49448	0.0379302	em02
FBtr0070429	FBtr0070429_678	-1.49911	0.0237513	0.91245	0.44598	em02
FBtr0070432	FBtr0070432_326	1.50773	0.713182	0.237797	0.985873	em02
FBtr0070432	FBtr0070432_372	0.64528	0.887385	1.10025	0.882778	em02
FBtr0070432	FBtr0070432_388	2.06028	0.630876	-0.31475	0.982404	em02
FBtr0070433	FBtr0070433_26	3.62318	0.154663	-4.49482	0.160131	em02
FBtr0070433	FBtr0070433_62	0.18584	0.985003	-1.05749	0.958922	em02
FBtr0070439	FBtr0070439_1002	0.875589	0.0919278	-0.524334	0.585005	em02
FBtr0070439	FBtr0070439_1007	1.13295	0.00204081	-0.781698	0.164679	em02
FBtr0070439	FBtr0070439_1041	0.623245	0.2057	-0.27199	0.809214	em02
FBtr0070439	FBtr0070439_124	2.97403	1.90892e-11	-2.62278	5.48694e-07	em02
FBtr0070439	FBtr0070439_135	2.42861	4.97632e-05	-2.07736	0.00583644	em02
FBtr0070439	FBtr0070439_607	0.188698	0.843581	0.162557	0.933457	em02
FBtr0070439	FBtr0070439_993	1.14224	0.0101722	-0.79099	0.249196	em02
FBtr0070442	FBtr0070442_271	-4.16899	1.67921e-11	0.34455	0.866911	em02
FBtr0070442	FBtr0070442_294	-6.61223	0.00401749	2.78779	0.49812	em02
FBtr0070442	FBtr0070442_320	-3.53866	5.23032e-12	-0.285775	0.875177	em02
FBtr0070445	FBtr0070445_96	0.694007	0.650761	-1.29251	0.529877	em02
FBtr0070447	FBtr0070447_85	2.95286	0.101512	-2.91056	0.246653	em02
FBtr0070447	FBtr0070447_9	0.0748632	0.985003	-0.0325681	0.998524	em02
FBtr0070448	FBtr0070448_180	1.37597	0.406823	-1.9156	0.379865	em02
FBtr0070479	FBtr0070479_83	0.807568	0.587311	-0.682076	0.800179	em02
FBtr0070495	FBtr0070495_118	0.315502	0.94748	-2.18179	0.684279	em02
FBtr0070495	FBtr0070495_92	0.329779	0.760194	-2.19606	0.0153833	em02
FBtr0070507	FBtr0070507_184	0.379808	0.799557	-2.20029	0.0993314	em02
FBtr0070507	FBtr0070507_189	0.989939	0.573823	-2.81043	0.126498	em02
FBtr0070507	FBtr0070507_194	-0.901367	0.143493	-0.919119	0.35254	em02
FBtr0070507	FBtr0070507_203	-0.87162	0.161281	-0.948867	0.33336	em02
FBtr0070507	FBtr0070507_510	0.234223	0.796635	-2.05471	0.00713267	em02
FBtr0070507	FBtr0070507_527	0.759325	0.242475	-2.57981	0.000182693	em02
FBtr0070508	FBtr0070508_309	-1.09564	0.130755	0.641465	0.649612	em02
FBtr0070509	FBtr0070509_13	0.18584	0.985003	0.41504	0.989915	em02
FBtr0070525	FBtr0070525_554	0.000512424	0.999514	0.175536	0.911776	em02
FBtr0070559	FBtr0070559_110	-7.59651	0.00293385	7.04504	0.0290376	em02
FBtr0070559	FBtr0070559_223	-1.39909	0.432684	0.84762	0.814873	em02
FBtr0070559	FBtr0070559_245	-1.98399	0.647147	1.43253	0.867158	em02
FBtr0070559	FBtr0070559_272	-4.29946	0.114629	3.74799	0.342272	em02
FBtr0070562	FBtr0070562_260	2.18576	0.682131	-1.09588	0.925227	em02
FBtr0070562	FBtr0070562_334	2.04349	0.757681	-0.953614	0.947777	em02
FBtr0070568	FBtr0070568_35	0.333353	0.856681	-0.643594	0.818296	em02
FBtr0070569	FBtr0070569_175	0.600936	0.915649	1.2617	0.89233	em02
FBtr0070569	FBtr0070569_40	2.02654	0.120903	-0.163904	0.974117	em02
FBtr0070583	FBtr0070583_332	-5.19536	0.0385748	5.96148	0.053151	em02
FBtr0070583	FBtr0070583_398	-4.92267	0.380234	5.68879	0.474286	em02
FBtr0070583	FBtr0070583_409	-0.012133	0.997827	0.778248	0.889261	em02
FBtr0070586	FBtr0070586_88	0.109035	0.965405	-0.730518	0.816968	em02
FBtr0070611	FBtr0070611_44	2.74851	7.87038e-12	-1.30642	0.0289789	em02
FBtr0070616	FBtr0070616_241	1.01807	0.0369893	-1.30768	0.0609439	em02
FBtr0070625	FBtr0070625_303	-0.278796	0.924625	-0.954384	0.821157	em02
FBtr0070625	FBtr0070625_31	-3.51151	0.167763	2.27833	0.612777	em02
FBtr0070625	FBtr0070625_85	-1.84168	0.566986	0.608499	0.938891	em02
FBtr0070626	FBtr0070626_335	1.24474	0.422406	-1.73157	0.399873	em02
FBtr0070626	FBtr0070626_342	2.4082	0.454498	-2.89502	0.534197	em02
FBtr0070626	FBtr0070626_353	1.10338	0.546355	-1.59021	0.529095	em02
FBtr0070626	FBtr0070626_380	0.661917	0.77161	-1.14874	0.721684	em02
FBtr0070627	FBtr0070627_129	-1.38925	0.0440942	-0.227854	0.909123	em02
FBtr0070627	FBtr0070627_135	-1.29524	0.0956926	-0.321863	0.877208	em02
FBtr0070643	FBtr0070643_166	1.70041	0.432673	-2.8858	0.273996	em02
FBtr0070643	FBtr0070643_293	-0.299536	0.904552	-0.885853	0.809654	em02
FBtr0070643	FBtr0070643_549	0.401369	0.863998	-1.58676	0.553438	em02
FBtr0070643	FBtr0070643_576	-0.229166	0.943247	-0.956223	0.832473	em02
FBtr0070643	FBtr0070643_58	-0.340193	0.913772	-0.845196	0.865737	em02
FBtr0070650	FBtr0070650_568	-1.28324	0.31505	0.457637	0.881797	em02
FBtr0070650	FBtr0070650_679	-4.42672	0.113613	3.60112	0.384709	em02
FBtr0070650	FBtr0070650_695	-1.10317	0.506126	0.277569	0.948095	em02
FBtr0070650	FBtr0070650_763	2.30131	0.220248	-3.12691	0.181301	em02
FBtr0070650	FBtr0070650_876	-2.52194	0.00104744	1.69634	0.121462	em02
FBtr0070652	FBtr0070652_125	1.21887	0.358588	-1.22788	0.546409	em02
FBtr0070668	FBtr0070668_152	-0.399106	0.951735	-0.594959	0.963544	em02
FBtr0070668	FBtr0070668_197	-2.0365	0.470854	1.04244	0.86217	em02
FBtr0070668	FBtr0070668_410	-0.435631	0.841785	-0.558434	0.882778	em02
FBtr0070668	FBtr0070668_510	-0.498641	0.838079	-0.495425	0.911321	em02
FBtr0070671	FBtr0070671_129	5.88	0.00265862	-4.7163	0.0700652	em02
FBtr0070671	FBtr0070671_68	1.27717	0.357494	-0.113465	0.982992	em02
FBtr0070683	FBtr0070683_27	-2.81405	0.428883	2.46663	0.678407	em02
FBtr0070685	FBtr0070685_109	0.961034	0.210871	-1.18071	0.25848	em02
FBtr0070685	FBtr0070685_195	1.71701	0.0033047	-1.93668	0.00861506	em02
FBtr0070685	FBtr0070685_272	2.08983	7.22492e-05	-2.3095	0.000337723	em02
FBtr0070685	FBtr0070685_407	0.15344	0.843303	-0.373116	0.744877	em02
FBtr0070685	FBtr0070685_619	-0.00633836	0.995317	-0.213338	0.901918	em02
FBtr0070686	FBtr0070686_17	-1.1153	0.135336	0.580785	0.696574	em02
FBtr0070701	FBtr0070701_359	-0.321112	0.95573	-1.92511	0.79062	em02
FBtr0070701	FBtr0070701_88	-1.78293	0.211729	-0.463292	0.904821	em02
FBtr0070723	FBtr0070723_288	-0.428241	0.827542	-0.0362418	0.997529	em02
FBtr0070723	FBtr0070723_336	1.12982	0.472986	-1.5943	0.464548	em02
FBtr0070723	FBtr0070723_376	-0.11475	0.940812	-0.349733	0.889261	em02
FBtr0070723	FBtr0070723_433	2.11045	0.167073	-2.57493	0.196308	em02
FBtr0070724	FBtr0070724_123	-0.619663	0.647326	0.333442	0.909123	em02
FBtr0070724	FBtr0070724_144	-1.72657	0.16445	1.44035	0.450374	em02
FBtr0070724	FBtr0070724_150	-1.65474	0.24916	1.36852	0.55924	em02
FBtr0070724	FBtr0070724_168	-0.498634	0.733117	0.212413	0.949719	em02
FBtr0070724	FBtr0070724_174	-0.522904	0.73313	0.236683	0.945897	em02
FBtr0070724	FBtr0070724_195	-0.0709141	0.976424	-0.215307	0.964551	em02
FBtr0070724	FBtr0070724_41	0.908677	0.43506	-1.1949	0.460677	em02
FBtr0070724	FBtr0070724_57	1.08381	0.479636	-1.37003	0.537376	em02
FBtr0070738	FBtr0070738_583	3.14515	0.203277	-2.96833	0.420596	em02
FBtr0070738	FBtr0070738_622	6.04328	0.124998	-5.86646	0.279337	em02
FBtr0070756	FBtr0070756_74	0.475385	0.92433	-1.55726	0.82399	em02
FBtr0070763	FBtr0070763_102	-2.88032	2.26655e-05	0.164149	0.946517	em02
FBtr0070763	FBtr0070763_213	0.2254	0.967342	-2.94157	0.585005	em02
FBtr0070764	FBtr0070764_84	-4.42652	0.406208	3.74377	0.683734	em02
FBtr0070772	FBtr0070772_102	-1.45616	0.0260961	0.337604	0.850431	em02
FBtr0070772	FBtr0070772_89	-1.33884	0.0066786	0.220279	0.889914	em02
FBtr0070780	FBtr0070780_35	0.18584	0.985003	1.44627	0.93972	em02
FBtr0070782	FBtr0070782_42	4.08788	0.10276	-3.23428	0.390641	em02
FBtr0070798	FBtr0070798_36	0.446384	0.823489	-1.53454	0.480702	em02
FBtr0070804	FBtr0070804_460	1.92283	0.442384	-1.07042	0.837	em02
FBtr0070807	FBtr0070807_68	-1.36256	0.46232	-0.972338	0.780198	em02
FBtr0070827	FBtr0070827_15	-0.510455	0.738428	0.24397	0.943366	em02
FBtr0070827	FBtr0070827_78	-0.562591	0.763739	0.296106	0.942582	em02
FBtr0070828	FBtr0070828_149	2.06026	0.797617	-3.1219	0.802358	em02
FBtr0070841	FBtr0070841_119	-0.0329815	0.987963	-0.80849	0.781753	em02
FBtr0070841	FBtr0070841_156	-1.24708	0.472493	0.405612	0.92387	em02
FBtr0070841	FBtr0070841_284	1.29298	0.472737	-2.13446	0.341453	em02
FBtr0070843	FBtr0070843_127	-0.161596	0.942351	-1.90423	0.310368	em02
FBtr0070847	FBtr0070847_52	1.40818	0.746468	-0.890047	0.920322	em02
FBtr0070865	FBtr0070865_201	3.68828	0.159523	-3.8292	0.280605	em02
FBtr0070865	FBtr0070865_215	3.71632	0.0882684	-3.85724	0.181649	em02
FBtr0070874	FBtr0070874_120	1.03386	0.594708	-0.792323	0.827437	em02
FBtr0070874	FBtr0070874_251	3.33472	0.195455	-3.09318	0.411114	em02
FBtr0070874	FBtr0070874_268	-0.412168	0.85683	0.653706	0.862126	em02
FBtr0070877	FBtr0070877_18	1.34686	0.411608	-1.10502	0.697713	em02
FBtr0070889	FBtr0070889_154	2.33782	0.392484	-1.10465	0.850431	em02
FBtr0070889	FBtr0070889_57	5.9883	0.0162989	-4.75513	0.169986	em02
FBtr0070890	FBtr0070890_282	4.99312	0.0362901	-2.62692	0.555587	em02
FBtr0070894	FBtr0070894_35	1.84665	0.0303094	-2.79321	0.00402487	em02
FBtr0070899	FBtr0070899_16	2.30131	0.19103	-2.36777	0.337902	em02
FBtr0070912	FBtr0070912_113	0.0446514	0.968266	-0.452052	0.733977	em02
FBtr0070914	FBtr0070914_168	0.586396	0.475509	-1.85286	0.0486258	em02
FBtr0070914	FBtr0070914_353	-1.99999	0.00158052	0.733531	0.611954	em02
FBtr0070914	FBtr0070914_359	-2.06238	0.00143917	0.795922	0.574974	em02
FBtr0070914	FBtr0070914_365	-1.9785	0.00296703	0.712042	0.640213	em02
FBtr0070914	FBtr0070914_371	-1.92634	0.00657658	0.659873	0.690717	em02
FBtr0070914	FBtr0070914_377	-2.19314	0.00586796	0.926682	0.574936	em02
FBtr0070914	FBtr0070914_71	0.40253	0.869593	-1.66899	0.544773	em02
FBtr0070918	FBtr0070918_47	-0.449247	0.670859	-0.321585	0.882302	em02
FBtr0070918	FBtr0070918_66	-0.696711	0.49529	-0.074121	0.983722	em02
FBtr0070921	FBtr0070921_24	-0.933424	0.611022	-0.586457	0.877795	em02
FBtr0070922	FBtr0070922_9	-2.18462	0.461174	0.767202	0.911776	em02
FBtr0070924	FBtr0070924_54	1.60406	0.203419	-0.939749	0.689931	em02
FBtr0070925	FBtr0070925_44	3.47121	0.0507399	-4.28647	0.0472399	em02
FBtr0070930	FBtr0070930_113	-2.47643	0.00604899	1.28894	0.390641	em02
FBtr0070930	FBtr0070930_169	-2.11659	0.0278666	0.929106	0.620847	em02
FBtr0070930	FBtr0070930_23	-0.444843	0.922361	-0.742646	0.925592	em02
FBtr0070937	FBtr0070937_246	1.14911	0.286191	-1.03457	0.543352	em02
FBtr0070948	FBtr0070948_32	-0.710337	0.872897	-0.272287	0.981636	em02
FBtr0070948	FBtr0070948_594	-3.58667	0.443683	2.60405	0.757609	em02
FBtr0070950	FBtr0070950_106	-0.4642	0.8255	-1.45787	0.562016	em02
FBtr0070950	FBtr0070950_159	-1.15295	0.774504	-0.769115	0.925422	em02
FBtr0070950	FBtr0070950_242	0.251943	0.757681	-2.17401	0.00267943	em02
FBtr0070950	FBtr0070950_416	-2.6088	0.0187779	0.68673	0.802358	em02
FBtr0070956	FBtr0070956_490	0.486417	0.624118	-1.14148	0.316825	em02
FBtr0070959	FBtr0070959_1093	-0.773494	0.760707	0.207337	0.978107	em02
FBtr0070959	FBtr0070959_1102	-0.62149	0.823489	0.0553328	0.996424	em02
FBtr0070959	FBtr0070959_396	0.355728	0.934729	-0.921886	0.89639	em02
FBtr0070959	FBtr0070959_417	0.548374	0.899701	-1.11453	0.871344	em02
FBtr0070959	FBtr0070959_453	1.36539	0.821793	-1.93155	0.844708	em02
FBtr0070959	FBtr0070959_47	-0.0324004	0.994191	-0.533757	0.945835	em02
FBtr0070972	FBtr0070972_113	-0.636135	0.830048	0.375639	0.952523	em02
FBtr0070972	FBtr0070972_90	1.10339	0.504113	-1.36388	0.579101	em02
FBtr0070974	FBtr0070974_50	0.832749	0.303878	-1.38264	0.155706	em02
FBtr0070974	FBtr0070974_54	1.14842	0.106083	-1.69831	0.0448725	em02
FBtr0070987	FBtr0070987_14	-1.8802	0.554406	0.948862	0.89427	em02
FBtr0070988	FBtr0070988_110	0.569463	0.386539	-0.79126	0.407296	em02
FBtr0070988	FBtr0070988_159	3.07864	2.88846e-05	-3.30043	0.000157584	em02
FBtr0070988	FBtr0070988_241	0.834159	0.294485	-1.05596	0.342886	em02
FBtr0070988	FBtr0070988_25	0.228929	0.899817	-0.450726	0.879351	em02
FBtr0070988	FBtr0070988_264	-0.1453	0.90552	-0.0764978	0.982062	em02
FBtr0070988	FBtr0070988_416	-0.574673	0.899701	0.352875	0.973757	em02
FBtr0070988	FBtr0070988_436	-0.114659	0.967474	-0.107139	0.989138	em02
FBtr0070988	FBtr0070988_45	-0.0105403	0.997563	-0.211258	0.971219	em02
FBtr0070988	FBtr0070988_518	1.31751	0.0878199	-1.53931	0.134645	em02
FBtr0070988	FBtr0070988_541	0.296598	0.783058	-0.518396	0.751189	em02
FBtr0070988	FBtr0070988_582	-0.0277785	0.973284	-0.194019	0.888487	em02
FBtr0070988	FBtr0070988_628	-0.065737	0.943247	-0.156061	0.926399	em02
FBtr0070988	FBtr0070988_854	0.970126	0.34854	-1.19192	0.417004	em02
FBtr0070992	FBtr0070992_52	0.691195	0.733869	-1.13073	0.697713	em02
FBtr0070994	FBtr0070994_109	-2.29154	0.00220992	0.193078	0.939038	em02
FBtr0071005	FBtr0071005_300	0.651936	0.295154	0.208991	0.903773	em02
FBtr0071007	FBtr0071007_71	-1.29956	0.470263	2.35902	0.304754	em02
FBtr0071015	FBtr0071015_160	-1.72493	0.334438	-0.958509	0.802358	em02
FBtr0071015	FBtr0071015_43	-1.01316	0.708533	-1.67029	0.678407	em02
FBtr0071017	FBtr0071017_200	2.46805	0.217305	-3.03862	0.250321	em02
FBtr0071017	FBtr0071017_83	-1.30207	0.409046	0.731492	0.826234	em02
FBtr0071020	FBtr0071020_66	1.23727	0.00872888	-0.959154	0.17443	em02
FBtr0071036	FBtr0071036_313	3.15108	0.0267227	-0.345549	0.939038	em02
FBtr0071036	FBtr0071036_410	3.34112	0.000864591	-0.535591	0.845685	em02
FBtr0071036	FBtr0071036_501	3.65531	7.29478e-12	-0.849784	0.414219	em02
FBtr0071039	FBtr0071039_4	0.993203	0.752458	-1.67707	0.706694	em02
FBtr0071042	FBtr0071042_46	1.06033	0.74702	-1.92171	0.67561	em02
FBtr0071042	FBtr0071042_51	-1.61821	0.118137	0.756832	0.712904	em02
FBtr0071042	FBtr0071042_78	-1.14846	0.390023	0.287082	0.936762	em02
FBtr0071048	FBtr0071048_270	0.77087	0.87491	1.20854	0.882778	em02
FBtr0071048	FBtr0071048_331	1.23023	0.657052	0.749181	0.897396	em02
FBtr0071048	FBtr0071048_49	0.448902	0.92633	1.5305	0.822979	em02
FBtr0071049	FBtr0071049_126	-0.0840618	0.965586	0.400467	0.883937	em02
FBtr0071049	FBtr0071049_129	0.626423	0.694699	-0.310018	0.929985	em02
FBtr0071049	FBtr0071049_134	0.193829	0.879801	0.122576	0.966724	em02
FBtr0071049	FBtr0071049_143	0.180015	0.904552	0.13639	0.966888	em02
FBtr0071049	FBtr0071049_160	1.79818	0.00305485	-1.48178	0.0735986	em02
FBtr0071049	FBtr0071049_198	0.679842	0.522466	-0.363437	0.876605	em02
FBtr0071066	FBtr0071066_442	-0.500925	0.53385	-0.105412	0.965194	em02
FBtr0071066	FBtr0071066_475	0.032838	0.973631	-0.639174	0.514702	em02
FBtr0071066	FBtr0071066_480	0.103569	0.91664	-0.709905	0.48627	em02
FBtr0071066	FBtr0071066_58	-1.2377	0.0706226	0.631364	0.626376	em02
FBtr0071066	FBtr0071066_590	-0.0186148	0.988084	-0.587721	0.693905	em02
FBtr0071071	FBtr0071071_351	0.000828381	0.999799	-0.626237	0.860993	em02
FBtr0071076	FBtr0071076_75	0.244583	0.837534	-0.934023	0.480702	em02
FBtr0071079	FBtr0071079_223	-1.39911	0.823718	0.614137	0.966888	em02
FBtr0071079	FBtr0071079_87	-0.00677763	0.998893	-0.778199	0.925592	em02
FBtr0071089	FBtr0071089_57	1.82724	0.143451	-1.87919	0.266692	em02
FBtr0071092	FBtr0071092_100	-0.668929	0.776875	0.994107	0.792045	em02
FBtr0071092	FBtr0071092_113	2.40607	0.515931	-2.08089	0.744002	em02
FBtr0071092	FBtr0071092_300	-0.382197	0.947277	0.707375	0.945845	em02
FBtr0071092	FBtr0071092_668	1.21562	0.66438	-0.89044	0.875591	em02
FBtr0071092	FBtr0071092_686	4.70648	0.0905447	-4.3813	0.255858	em02
FBtr0071092	FBtr0071092_95	0.738446	0.897282	-0.413268	0.977887	em02
FBtr0071093	FBtr0071093_109	0.375494	0.614595	-1.09092	0.179422	em02
FBtr0071109	FBtr0071109_1024	-1.41197	0.02047	0.805069	0.48627	em02
FBtr0071109	FBtr0071109_106	2.4316	0.0580844	-3.0385	0.0582048	em02
FBtr0071109	FBtr0071109_135	1.40442	0.366138	-2.01132	0.32303	em02
FBtr0071109	FBtr0071109_725	-2.6792	0.00124467	2.0723	0.0789577	em02
FBtr0071109	FBtr0071109_852	-0.414205	0.680265	-0.192693	0.938309	em02
FBtr0071109	FBtr0071109_888	-0.838282	0.600733	0.231384	0.956684	em02
FBtr0071112	FBtr0071112_117	-0.875754	0.00321596	-0.157536	0.907302	em02
FBtr0071112	FBtr0071112_148	-2.69742	4.2598e-20	1.66413	0.00206126	em02
FBtr0071112	FBtr0071112_335	-0.265024	0.355124	-0.768266	0.20384	em02
FBtr0071112	FBtr0071112_393	-0.722734	0.134495	-0.310557	0.82399	em02
FBtr0071112	FBtr0071112_8	0.403982	0.59927	-1.43727	0.108967	em02
FBtr0071117	FBtr0071117_165	2.36287	0.191625	-2.18625	0.407733	em02
FBtr0071117	FBtr0071117_29	5.91064	0.00349484	-5.73403	0.0224151	em02
FBtr0071117	FBtr0071117_68	0.337863	0.90993	-0.161251	0.983052	em02
FBtr0071125	FBtr0071125_20	-1.15116	0.380819	-0.293833	0.933665	em02
FBtr0071125	FBtr0071125_365	0.421936	0.927051	-1.86693	0.74781	em02
FBtr0071125	FBtr0071125_395	-2.15991	0.471286	0.714911	0.921321	em02
FBtr0071132	FBtr0071132_33	2.39395	0.00571459	-2.6905	0.0111281	em02
FBtr0071132	FBtr0071132_409	-1.15687	0.628982	0.86032	0.849767	em02
FBtr0071140	FBtr0071140_41	0.906912	0.471215	-0.997479	0.615232	em02
FBtr0071142	FBtr0071142_14	3.19469	0.000747637	-2.74194	0.0231059	em02
FBtr0071151	FBtr0071151_55	4.87356	0.0460141	-4.26746	0.201662	em02
FBtr0071152	FBtr0071152_97	0.823333	0.874591	-0.914605	0.92387	em02
FBtr0071153	FBtr0071153_76	0.922855	0.887385	-2.11348	0.832607	em02
FBtr0071157	FBtr0071157_20	6.36534	0.110915	-6.43025	0.229397	em02
FBtr0071174	FBtr0071174_328	-0.458713	0.807482	-1.24625	0.596093	em02
FBtr0071174	FBtr0071174_49	0.847429	0.0154484	-2.55239	5.42266e-09	em02
FBtr0071174	FBtr0071174_80	0.126968	0.876676	-1.83193	0.00421954	em02
FBtr0071174	FBtr0071174_89	-0.408812	0.558861	-1.29615	0.102417	em02
FBtr0071175	FBtr0071175_155	-1.26981	0.34559	0.845739	0.730844	em02
FBtr0071175	FBtr0071175_285	0.786781	0.857741	-1.21085	0.868431	em02
FBtr0071183	FBtr0071183_31	-0.657974	0.830495	-1.17644	0.80192	em02
FBtr0071183	FBtr0071183_4	-0.657974	0.830495	-1.17644	0.80192	em02
FBtr0071188	FBtr0071188_48	0.496943	0.792174	-1.92544	0.303201	em02
FBtr0071192	FBtr0071192_481	-0.669738	0.64318	1.26896	0.506364	em02
FBtr0071212	FBtr0071212_261	0.200408	0.88401	-1.25296	0.342886	em02
FBtr0071219	FBtr0071219_345	0.546261	0.514097	-1.32758	0.170805	em02
FBtr0071219	FBtr0071219_348	0.815908	0.420764	-1.59723	0.186101	em02
FBtr0071221	FBtr0071221_98	-1.8142	0.649103	3.17402	0.551188	em02
FBtr0071222	FBtr0071222_137	-1.27942	0.206778	0.502912	0.830684	em02
FBtr0071222	FBtr0071222_168	0.469108	0.676122	-1.24562	0.342272	em02
FBtr0071222	FBtr0071222_192	-1.24708	0.413724	0.470571	0.897396	em02
FBtr0071223	FBtr0071223_126	-0.688601	0.801473	1.0351	0.814502	em02
FBtr0071223	FBtr0071223_83	-1.01005	0.610621	1.35655	0.654959	em02
FBtr0071233	FBtr0071233_57	-0.362558	0.851704	0.424807	0.905987	em02
FBtr0071233	FBtr0071233_60	-0.4938	0.789055	0.556049	0.871344	em02
FBtr0071237	FBtr0071237_74	4.27328	0.0910249	-2.99575	0.454219	em02
FBtr0071246	FBtr0071246_242	1.35659	0.0617573	-0.704387	0.619156	em02
FBtr0071246	FBtr0071246_298	0.293387	0.838696	0.358818	0.891372	em02
FBtr0071246	FBtr0071246_52	1.36339	0.182607	-0.711188	0.724988	em02
FBtr0071279	FBtr0071279_449	0.922757	0.92433	2.95384	0.83642	em02
FBtr0071284	FBtr0071284_41	-1.59837	0.46542	1.69721	0.622376	em02
FBtr0071284	FBtr0071284_86	-1.13607	0.772563	1.2349	0.856749	em02
FBtr0071287	FBtr0071287_68	4.0879	0.550082	-0.924122	0.965194	em02
FBtr0071299	FBtr0071299_199	-1.07963	0.322715	-0.409175	0.875254	em02
FBtr0071300	FBtr0071300_44	2.46249	3.17844e-09	-3.51858	1.24856e-11	em02
FBtr0071314	FBtr0071314_236	0.963451	0.742125	-1.75519	0.670308	em02
FBtr0071319	FBtr0071319_83	0.716374	0.577031	-0.594311	0.799959	em02
FBtr0071332	FBtr0071332_230	-1.12772	0.211173	0.791078	0.625696	em02
FBtr0071332	FBtr0071332_70	2.40642	0.000382281	-2.74306	0.000788429	em02
FBtr0071349	FBtr0071349_352	-0.927572	0.20571	0.37998	0.8195	em02
FBtr0071349	FBtr0071349_502	-0.0847864	0.931174	-0.462806	0.70954	em02
FBtr0071349	FBtr0071349_525	-0.842157	0.554493	0.294565	0.932763	em02
FBtr0071361	FBtr0071361_136	1.18341	0.303207	-1.80065	0.204459	em02
FBtr0071363	FBtr0071363_45	-1.83255	0.00232968	1.22305	0.184804	em02
FBtr0071363	FBtr0071363_52	-1.6059	0.0127078	0.996399	0.346475	em02
FBtr0071367	FBtr0071367_240	1.25022	0.480597	-1.29379	0.649612	em02
FBtr0071367	FBtr0071367_247	1.76495	0.309199	-1.80852	0.480976	em02
FBtr0071367	FBtr0071367_265	2.25617	0.367602	-2.29975	0.547944	em02
FBtr0071368	FBtr0071368_37	1.28842	0.214754	-2.19571	0.0665689	em02
FBtr0071371	FBtr0071371_8	3.12441	0.278967	-1.77	0.751201	em02
FBtr0071379	FBtr0071379_370	1.0159	0.798894	0.647705	0.938396	em02
FBtr0071393	FBtr0071393_27	-0.621501	0.894852	0.281575	0.980766	em02
FBtr0071405	FBtr0071405_169	0.633343	0.898974	-1.21544	0.878386	em02
FBtr0071405	FBtr0071405_76	1.52854	0.152008	-2.11064	0.121752	em02
FBtr0071430	FBtr0071430_74	-0.851595	0.695016	-0.216864	0.9713	em02
FBtr0071444	FBtr0071444_117	-1.10207	0.0790794	-0.46845	0.717705	em02
FBtr0071444	FBtr0071444_57	-1.06506	0.0310593	-0.505455	0.602209	em02
FBtr0071450	FBtr0071450_250	-0.671774	0.938705	0.684476	0.971441	em02
FBtr0071450	FBtr0071450_305	0.651527	0.832597	-0.638825	0.910071	em02
FBtr0071460	FBtr0071460_312	1.10339	0.535594	-2.92833	0.120204	em02
FBtr0071460	FBtr0071460_52	-1.87363	0.0190801	0.0486874	0.991562	em02
FBtr0071460	FBtr0071460_575	-0.495411	0.461447	-1.32954	0.100811	em02
FBtr0071465	FBtr0071465_3	0.385179	0.904552	0.0842988	0.993981	em02
FBtr0071487	FBtr0071487_34	-0.754201	0.911561	1.57749	0.889133	em02
FBtr0071487	FBtr0071487_363	-0.298	0.909172	1.12129	0.776036	em02
FBtr0071491	FBtr0071491_55	1.92277	0.599659	-0.65949	0.93972	em02
FBtr0071497	FBtr0071497_78	-1.90296	0.665041	-0.48026	0.968351	em02
FBtr0071503	FBtr0071503_16	-3.66114	0.096818	3.69316	0.212103	em02
FBtr0071522	FBtr0071522_31	0.76281	0.0473815	-1.41122	0.00747543	em02
FBtr0071526	FBtr0071526_55	-0.847519	0.639531	1.1003	0.691701	em02
FBtr0071546	FBtr0071546_266	1.05895	0.028311	-1.51619	0.0256438	em02
FBtr0071546	FBtr0071546_504	0.668229	0.230024	-1.12547	0.153249	em02
FBtr0071546	FBtr0071546_510	0.549719	0.364865	-1.00696	0.234181	em02
FBtr0071546	FBtr0071546_702	0.450059	0.611726	-0.907305	0.45268	em02
FBtr0071548	FBtr0071548_31	0.688352	0.765509	-1.58058	0.58863	em02
FBtr0071548	FBtr0071548_37	1.44476	0.387648	-2.33699	0.250541	em02
FBtr0071548	FBtr0071548_70	0.185865	0.979843	-1.0781	0.929985	em02
FBtr0071562	FBtr0071562_249	2.9227	0.431128	-1.6357	0.828781	em02
FBtr0071563	FBtr0071563_183	0.852328	0.466598	-0.605594	0.791403	em02
FBtr0071563	FBtr0071563_190	-0.289326	0.704033	0.53606	0.654844	em02
FBtr0071563	FBtr0071563_203	-0.187081	0.823238	0.433816	0.736314	em02
FBtr0071563	FBtr0071563_329	-0.546393	0.46232	0.793128	0.479844	em02
FBtr0071573	FBtr0071573_71	1.39821	0.271662	-1.65952	0.342865	em02
FBtr0071575	FBtr0071575_12	-0.07716	0.985276	-0.497292	0.953849	em02
FBtr0071590	FBtr0071590_125	2.48622	0.23094	-1.74758	0.625696	em02
FBtr0071590	FBtr0071590_61	0.823283	0.703033	-0.0846424	0.991705	em02
FBtr0071600	FBtr0071600_39	-2.94862	0.411273	1.76988	0.802358	em02
FBtr0071606	FBtr0071606_134	-1.73615	0.567663	-0.947037	0.883682	em02
FBtr0071606	FBtr0071606_165	-4.26802	0.109325	1.58482	0.788998	em02
FBtr0071609	FBtr0071609_55	0.536356	0.664318	-0.909057	0.602924	em02
FBtr0071609	FBtr0071609_61	0.311392	0.838014	-0.684092	0.75102	em02
FBtr0071610	FBtr0071610_264	1.92274	0.814931	0.386205	0.988906	em02
FBtr0071610	FBtr0071610_339	3.04342	0.55752	-0.734476	0.957513	em02
FBtr0071610	FBtr0071610_429	5.58767	0.0666661	-3.27873	0.53384	em02
FBtr0071610	FBtr0071610_508	3.27323	0.383119	-0.964287	0.91815	em02
FBtr0071610	FBtr0071610_562	3.50766	0.388673	-1.19871	0.901918	em02
FBtr0071610	FBtr0071610_568	1.40815	0.874591	0.900794	0.964434	em02
FBtr0071610	FBtr0071610_580	4.62312	0.161071	-2.31418	0.717705	em02
FBtr0071610	FBtr0071610_586	4.62312	0.161071	-2.31418	0.717705	em02
FBtr0071610	FBtr0071610_598	4.38211	0.198244	-2.07317	0.7626	em02
FBtr0071610	FBtr0071610_628	3.36533	0.59539	-1.05639	0.945845	em02
FBtr0071610	FBtr0071610_758	6.1726	0.125243	-3.86365	0.582158	em02
FBtr0071610	FBtr0071610_841	2.94067	0.31586	-0.631719	0.938309	em02
FBtr0071610	FBtr0071610_856	2.40817	0.49381	-0.0992235	0.995545	em02
FBtr0071613	FBtr0071613_125	-0.439484	0.576824	0.259629	0.878721	em02
FBtr0071613	FBtr0071613_26	-0.160941	0.928088	-0.0189142	0.998036	em02
FBtr0071613	FBtr0071613_76	0.117186	0.935613	-0.297041	0.901417	em02
FBtr0071615	FBtr0071615_132	2.58971	1.35016e-05	-2.31516	0.00150621	em02
FBtr0071615	FBtr0071615_88	2.99167	0.00760558	-2.71712	0.0622571	em02
FBtr0071636	FBtr0071636_359	1.32335	0.33481	-1.51598	0.433601	em02
FBtr0071636	FBtr0071636_371	-0.791416	0.462665	0.598781	0.758779	em02
FBtr0071636	FBtr0071636_538	0.0662696	0.939569	-0.258905	0.841677	em02
FBtr0071636	FBtr0071636_544	0.085833	0.919603	-0.278469	0.827202	em02
FBtr0071636	FBtr0071636_607	0.339697	0.691767	-0.532332	0.677981	em02
FBtr0071636	FBtr0071636_738	-1.98741	0.1614	1.79477	0.385469	em02
FBtr0071636	FBtr0071636_749	-2.13603	0.446771	1.9434	0.6755	em02
FBtr0071636	FBtr0071636_777	0.078946	0.964852	-0.271582	0.921175	em02
FBtr0071636	FBtr0071636_877	0.0703843	0.951215	-0.26302	0.880904	em02
FBtr0071636	FBtr0071636_882	0.0456695	0.972885	-0.238305	0.904545	em02
FBtr0071637	FBtr0071637_152	2.29601	0.247394	-0.946985	0.827437	em02
FBtr0071637	FBtr0071637_191	1.89856	0.0930705	-0.549535	0.841909	em02
FBtr0071637	FBtr0071637_70	2.82327	0.133473	-1.47424	0.679217	em02
FBtr0071637	FBtr0071637_87	1.87122	0.0175159	-0.52219	0.780571	em02
FBtr0071637	FBtr0071637_92	2.83053	0.0015187	-1.4815	0.295059	em02
FBtr0071641	FBtr0071641_141	2.03437	0.0325096	-1.99827	0.111093	em02
FBtr0071654	FBtr0071654_284	0.60089	0.824339	1.61913	0.628835	em02
FBtr0071654	FBtr0071654_287	0.770812	0.765149	1.44921	0.685844	em02
FBtr0071654	FBtr0071654_507	4.95031	0.0804821	-2.73028	0.589515	em02
FBtr0071654	FBtr0071654_540	4.43575	0.165837	-2.21572	0.718713	em02
FBtr0071654	FBtr0071654_850	0.564361	0.866452	1.65566	0.696891	em02
FBtr0071661	FBtr0071661_169	1.10235	0.20434	-0.980475	0.46031	em02
FBtr0071661	FBtr0071661_221	2.79465	0.0137312	-2.67278	0.0672621	em02
FBtr0071661	FBtr0071661_232	2.08631	0.0810161	-1.96444	0.229397	em02
FBtr0071661	FBtr0071661_99	-1.19746	0.445406	1.31933	0.581671	em02
FBtr0071672	FBtr0071672_80	-0.98405	0.566603	0.923449	0.754277	em02
FBtr0071679	FBtr0071679_100	0.524564	0.456293	-1.0436	0.25848	em02
FBtr0071686	FBtr0071686_125	-0.850451	0.172481	0.0715554	0.978107	em02
FBtr0071686	FBtr0071686_27	2.32881	0.271315	-3.1077	0.246653	em02
FBtr0071686	FBtr0071686_44	1.52372	0.158775	-2.30262	0.0722006	em02
FBtr0071686	FBtr0071686_74	-0.28958	0.660118	-0.489316	0.614202	em02
FBtr0071688	FBtr0071688_52	2.39144	0.47905	-1.99449	0.734447	em02
FBtr0071688	FBtr0071688_7	1.97638	0.590167	-1.57943	0.816374	em02
FBtr0071688	FBtr0071688_88	1.60087	0.355761	-1.20392	0.699673	em02
FBtr0071700	FBtr0071700_33	4.85079	0.198468	-3.94547	0.502973	em02
FBtr0071755	FBtr0071755_183	2.30184	0.335594	-2.70348	0.416215	em02
FBtr0071755	FBtr0071755_73	1.51075	0.151635	-1.91239	0.159654	em02
FBtr0071756	FBtr0071756_31	-4.72622	0.0565365	3.4579	0.351511	em02
FBtr0071758	FBtr0071758_18	-1.56158	0.696232	1.44705	0.842869	em02
FBtr0071758	FBtr0071758_6	-1.56158	0.696232	1.44705	0.842869	em02
FBtr0071761	FBtr0071761_169	1.43961	0.214754	-2.21903	0.111093	em02
FBtr0071761	FBtr0071761_52	0.62035	0.623168	-1.39977	0.33942	em02
FBtr0071763	FBtr0071763_160	1.92278	0.464774	-2.87588	0.395794	em02
FBtr0071763	FBtr0071763_165	-0.435623	0.877585	-0.517478	0.918951	em02
FBtr0071763	FBtr0071763_366	0.422895	0.844734	-1.376	0.588983	em02
FBtr0071774	FBtr0071774_147	1.12067	0.0154084	-2.01862	0.000123422	em02
FBtr0071774	FBtr0071774_255	-0.787117	0.416973	-0.110828	0.973315	em02
FBtr0071774	FBtr0071774_259	-1.14018	0.232934	0.242234	0.926399	em02
FBtr0071774	FBtr0071774_48	0.834516	0.147192	-1.73246	0.00703936	em02
FBtr0071775	FBtr0071775_31	4.04338	0.472986	-1.87179	0.882302	em02
FBtr0071775	FBtr0071775_639	-1.84173	0.827542	4.01332	0.725385	em02
FBtr0071777	FBtr0071777_142	1.1858	0.810833	3.01903	0.626875	em02
FBtr0071787	FBtr0071787_28	3.47528	0.294577	-4.03298	0.370441	em02
FBtr0071800	FBtr0071800_58	-0.758562	0.552003	-0.259436	0.935693	em02
FBtr0071832	FBtr0071832_16	-1.98403	0.6983	-0.490248	0.973456	em02
FBtr0071838	FBtr0071838_203	-0.036507	0.994232	-0.137147	0.992573	em02
FBtr0071838	FBtr0071838_232	-3.3391	0.483493	3.16544	0.685182	em02
FBtr0071838	FBtr0071838_248	0.881006	0.724896	-1.05466	0.798335	em02
FBtr0071838	FBtr0071838_389	0.890417	0.813018	-1.06407	0.871344	em02
FBtr0071838	FBtr0071838_491	1.18586	0.626963	-1.35952	0.721684	em02
FBtr0071843	FBtr0071843_5	4.7972	0.040043	-4.76841	0.11895	em02
FBtr0071845	FBtr0071845_126	4.53746	0.103734	-0.206979	0.987971	em02
FBtr0071868	FBtr0071868_1	0.0350367	0.977249	-1.03715	0.32554	em02
FBtr0071868	FBtr0071868_7	0.0350367	0.977249	-1.03715	0.32554	em02
FBtr0071868	FBtr0071868_89	0.644822	0.218267	-1.64694	0.00512335	em02
FBtr0071903	FBtr0071903_49	1.78672	0.549551	-1.78285	0.712659	em02
FBtr0071903	FBtr0071903_63	4.21331	0.310599	-4.20944	0.493606	em02
FBtr0071907	FBtr0071907_47	2.17278	0.00107557	-2.25847	0.0090068	em02
FBtr0071936	FBtr0071936_100	1.00491	0.0773314	-1.65215	0.0118959	em02
FBtr0071951	FBtr0071951_138	-0.311652	0.958674	-0.305922	0.98271	em02
FBtr0071953	FBtr0071953_111	-0.192689	0.965641	1.55797	0.760126	em02
FBtr0071953	FBtr0071953_160	4.44381	0.00973049	-3.07853	0.214467	em02
FBtr0071953	FBtr0071953_197	0.8627	0.639369	0.50258	0.897396	em02
FBtr0071953	FBtr0071953_78	-0.192689	0.965641	1.55797	0.760126	em02
FBtr0071963	FBtr0071963_16	-3.4855	0.576481	3.6151	0.731118	em02
FBtr0071963	FBtr0071963_77	-2.58291	0.699246	2.71251	0.820326	em02
FBtr0071994	FBtr0071994_249	1.38748	0.646245	-1.83502	0.689931	em02
FBtr0071994	FBtr0071994_71	0.18584	0.985003	-0.633378	0.980159	em02
FBtr0071994	FBtr0071994_89	0.507771	0.879801	-0.955309	0.856749	em02
FBtr0072010	FBtr0072010_145	1.87675	0.0567668	-2.25973	0.067346	em02
FBtr0072010	FBtr0072010_18	-2.06729	0.508248	1.6843	0.757609	em02
FBtr0072010	FBtr0072010_92	0.350354	0.79843	-0.733342	0.697713	em02
FBtr0072027	FBtr0072027_150	-3.52833	0.116733	3.0886	0.341453	em02
FBtr0072027	FBtr0072027_155	-0.536616	0.858997	0.0968889	0.99179	em02
FBtr0072036	FBtr0072036_53	0.523722	0.848115	-1.47796	0.667087	em02
FBtr0072038	FBtr0072038_169	2.93971	0.310599	-3.76809	0.325768	em02
FBtr0072058	FBtr0072058_115	-1.67594	0.118813	1.20149	0.498121	em02
FBtr0072058	FBtr0072058_193	0.837311	0.112112	-1.31175	0.0552909	em02
FBtr0072058	FBtr0072058_322	-0.249219	0.81044	-0.225223	0.911776	em02
FBtr0072058	FBtr0072058_36	0.248317	0.82565	-0.722759	0.616596	em02
FBtr0072065	FBtr0072065_45	-0.591768	0.928775	-0.392242	0.990267	em02
FBtr0072073	FBtr0072073_249	0.172161	0.863998	-0.974493	0.345522	em02
FBtr0072073	FBtr0072073_370	-0.987445	0.119848	0.185113	0.925227	em02
FBtr0072073	FBtr0072073_387	-0.319221	0.765413	-0.48311	0.786818	em02
FBtr0072073	FBtr0072073_66	-0.698382	0.223534	-0.103949	0.958802	em02
FBtr0072073	FBtr0072073_99	-0.948673	0.0187386	0.146341	0.918639	em02
FBtr0072083	FBtr0072083_94	-0.492235	0.928254	0.181488	0.991562	em02
FBtr0072084	FBtr0072084_45	3.74382	0.0968677	-2.89653	0.398536	em02
FBtr0072085	FBtr0072085_67	0.450699	0.524398	-1.80816	0.00901131	em02
FBtr0072087	FBtr0072087_379	2.54277	0.129658	-3.3268	0.108774	em02
FBtr0072087	FBtr0072087_423	-3.12046	0.250622	2.33643	0.612777	em02
FBtr0072087	FBtr0072087_517	-0.855791	0.074604	0.0717618	0.971219	em02
FBtr0072087	FBtr0072087_561	-1.87908	0.235134	1.09505	0.711948	em02
FBtr0072097	FBtr0072097_145	0.209448	0.839918	-0.624486	0.649612	em02
FBtr0072097	FBtr0072097_85	-0.0392043	0.979311	-0.375833	0.868431	em02
FBtr0072099	FBtr0072099_107	0.723488	0.802852	0.34312	0.958899	em02
FBtr0072099	FBtr0072099_19	3.97806	0.075351	-2.91145	0.401312	em02
FBtr0072112	FBtr0072112_10	3.93307	1.95448e-05	-4.34532	4.35513e-05	em02
FBtr0072112	FBtr0072112_31	4.0433	2.86967e-05	-4.45555	6.51806e-05	em02
FBtr0072120	FBtr0072120_316	0.0263323	0.98072	-0.592461	0.625185	em02
FBtr0072127	FBtr0072127_102	2.28056	0.0579422	0.377273	0.912132	em02
FBtr0072129	FBtr0072129_263	0.611137	0.834274	-0.607477	0.909481	em02
FBtr0072129	FBtr0072129_449	-0.176721	0.94128	0.180381	0.974117	em02
FBtr0072129	FBtr0072129_456	0.206545	0.903945	-0.202885	0.953849	em02
FBtr0072129	FBtr0072129_497	-2.27622	0.286653	2.27988	0.47263	em02
FBtr0072133	FBtr0072133_43	0.716421	0.912419	-1.64289	0.877457	em02
FBtr0072133	FBtr0072133_85	-0.939615	0.792215	0.0131476	0.998928	em02
FBtr0072133	FBtr0072133_98	0.233207	0.962911	-1.15967	0.868031	em02
FBtr0072134	FBtr0072134_50	0.145204	0.973285	-0.74782	0.911776	em02
FBtr0072134	FBtr0072134_90	5.17261	0.160478	-5.77523	0.22998	em02
FBtr0072143	FBtr0072143_261	2.46659	0.117711	0.377506	0.937532	em02
FBtr0072143	FBtr0072143_271	2.36641	0.265997	0.477684	0.936982	em02
FBtr0072145	FBtr0072145_140	1.8639	0.418453	-1.75055	0.637763	em02
FBtr0072145	FBtr0072145_147	0.18585	0.975432	-0.0724997	0.997813	em02
FBtr0072145	FBtr0072145_176	3.35571	0.187419	-3.24236	0.36874	em02
FBtr0072154	FBtr0072154_111	-1.11334	0.27192	-0.592176	0.774339	em02
FBtr0072154	FBtr0072154_143	1.12137	0.212857	-2.82688	0.0021512	em02
FBtr0072154	FBtr0072154_192	-1.69337	0.195908	-0.0121429	0.998928	em02
FBtr0072154	FBtr0072154_54	-0.3991	0.861789	-1.30641	0.638095	em02
FBtr0072156	FBtr0072156_43	-0.453543	0.835709	-1.1561	0.683734	em02
FBtr0072157	FBtr0072157_155	1.40819	0.835709	1.92938	0.868431	em02
FBtr0072157	FBtr0072157_305	6.36524	0.105293	-3.02768	0.691701	em02
FBtr0072157	FBtr0072157_512	0.185837	0.982548	3.15173	0.760419	em02
FBtr0072157	FBtr0072157_651	3.99309	0.296485	-0.655528	0.953849	em02
FBtr0072157	FBtr0072157_837	0.0338576	0.994488	3.30371	0.479796	em02
FBtr0072162	FBtr0072162_165	-3.42654	0.40856	4.48155	0.446694	em02
FBtr0072162	FBtr0072162_177	-3.42654	0.40856	4.48155	0.446694	em02
FBtr0072162	FBtr0072162_98	1.47535	0.450368	-0.420345	0.943366	em02
FBtr0072163	FBtr0072163_64	-0.51855	0.553666	0.185535	0.931521	em02
FBtr0072166	FBtr0072166_127	1.31869	0.147319	-1.15273	0.416215	em02
FBtr0072166	FBtr0072166_166	1.34048	0.0111301	-1.17452	0.140916	em02
FBtr0072166	FBtr0072166_47	0.018763	0.9811	0.147201	0.920099	em02
FBtr0072166	FBtr0072166_80	-0.0798883	0.915622	0.245852	0.849678	em02
FBtr0072168	FBtr0072168_56	3.27326	0.153546	-3.22143	0.309339	em02
FBtr0072168	FBtr0072168_83	1.14931	0.621457	-1.09747	0.786669	em02
FBtr0072177	FBtr0072177_139	0.161405	0.783655	0.212833	0.871344	em02
FBtr0072177	FBtr0072177_243	0.650844	0.295918	-0.276605	0.865705	em02
FBtr0072195	FBtr0072195_126	2.30127	0.62173	-1.12655	0.910304	em02
FBtr0072195	FBtr0072195_76	2.43376	0.186888	-1.25904	0.732249	em02
FBtr0072195	FBtr0072195_81	0.716356	0.80236	0.45836	0.939282	em02
FBtr0072204	FBtr0072204_169	-0.779518	0.0236013	0.00946829	0.997641	em02
FBtr0072204	FBtr0072204_199	-0.880656	0.0366206	0.110606	0.936982	em02
FBtr0072204	FBtr0072204_245	-0.692157	0.216736	-0.0778929	0.968571	em02
FBtr0072204	FBtr0072204_279	-0.267096	0.58874	-0.502954	0.449842	em02
FBtr0072204	FBtr0072204_306	-0.365525	0.474624	-0.404525	0.632211	em02
FBtr0072204	FBtr0072204_36	-0.191319	0.718747	-0.578731	0.343801	em02
FBtr0072205	FBtr0072205_12	-0.851598	0.737587	2.14054	0.472601	em02
FBtr0072205	FBtr0072205_34	-0.513734	0.853407	1.80268	0.574679	em02
FBtr0072207	FBtr0072207_141	-1.80606	0.576459	0.966581	0.888276	em02
FBtr0072207	FBtr0072207_33	0.365182	0.845132	-1.20466	0.597909	em02
FBtr0072207	FBtr0072207_62	0.311391	0.858997	-1.15087	0.582158	em02
FBtr0072208	FBtr0072208_9	4.33881	0.191538	-3.95737	0.417004	em02
FBtr0072210	FBtr0072210_18	0.282328	0.866452	-0.721098	0.751189	em02
FBtr0072220	FBtr0072220_24	-1.16205	0.371335	0.200753	0.958899	em02
FBtr0072220	FBtr0072220_27	-1.03653	0.475103	0.0752237	0.991274	em02
FBtr0072220	FBtr0072220_62	-1.49862	0.298616	0.537323	0.878386	em02
FBtr0072221	FBtr0072221_159	-0.28359	0.947484	0.00544455	0.999582	em02
FBtr0072225	FBtr0072225_60	-0.315267	0.899915	-0.159861	0.979815	em02
FBtr0072227	FBtr0072227_145	-2.33259	7.42588e-05	0.977112	0.351312	em02
FBtr0072227	FBtr0072227_242	-0.621315	0.599292	-0.734167	0.699673	em02
FBtr0072227	FBtr0072227_272	0.875932	0.312528	-2.23141	0.017514	em02
FBtr0072234	FBtr0072234_116	-0.171295	0.859736	-0.732958	0.493606	em02
FBtr0072235	FBtr0072235_26	0.742251	0.547078	-0.992897	0.581729	em02
FBtr0072235	FBtr0072235_32	0.742251	0.547078	-0.992897	0.581729	em02
FBtr0072249	FBtr0072249_111	0.18584	0.985003	-0.369475	0.991274	em02
FBtr0072249	FBtr0072249_82	0.323358	0.915622	-0.506993	0.925592	em02
FBtr0072250	FBtr0072250_58	-1.02771	0.208691	0.581046	0.71625	em02
FBtr0072250	FBtr0072250_68	-1.23633	0.147309	0.789667	0.612777	em02
FBtr0072251	FBtr0072251_146	0.688355	0.763739	1.40054	0.74554	em02
FBtr0072251	FBtr0072251_149	0.688355	0.763739	1.40054	0.74554	em02
FBtr0072260	FBtr0072260_132	-0.400507	0.79512	-0.616932	0.79873	em02
FBtr0072260	FBtr0072260_212	-0.852103	0.670925	-0.165335	0.978371	em02
FBtr0072260	FBtr0072260_220	-2.04303	0.0396721	1.02559	0.573881	em02
FBtr0072260	FBtr0072260_268	-0.762117	0.562957	-0.255321	0.937532	em02
FBtr0072260	FBtr0072260_27	0.408247	0.838014	-1.42569	0.52471	em02
FBtr0072262	FBtr0072262_187	1.54574	0.136604	-0.60432	0.791315	em02
FBtr0072268	FBtr0072268_75	-1.77461	0.230017	1.28087	0.619044	em02
FBtr0072280	FBtr0072280_3	1.82321	0.669368	-1.66622	0.826828	em02
FBtr0072281	FBtr0072281_196	-4.89416	0.0239015	3.53227	0.259221	em02
FBtr0072281	FBtr0072281_510	-0.136065	0.94128	-1.22582	0.4869	em02
FBtr0072281	FBtr0072281_518	0.0337946	0.976257	-1.39568	0.0858461	em02
FBtr0072281	FBtr0072281_574	2.7708	0.107328	-4.13268	0.0382006	em02
FBtr0072285	FBtr0072285_209	4.64525	0.000604275	-4.19543	0.0127253	em02
FBtr0072287	FBtr0072287_81	-0.832514	0.520298	0.237999	0.942582	em02
FBtr0072302	FBtr0072302_122	-0.98401	0.899701	2.80222	0.791255	em02
FBtr0072302	FBtr0072302_13	2.52369	0.114186	-0.705487	0.857803	em02
FBtr0072302	FBtr0072302_61	2.50775	0.141839	-0.689545	0.874925	em02
FBtr0072338	FBtr0072338_81	-1.01005	0.46702	0.696004	0.791727	em02
FBtr0072342	FBtr0072342_43	-0.457997	0.799367	0.168257	0.971219	em02
FBtr0072347	FBtr0072347_26	2.1707	0.407804	-1.5594	0.740814	em02
FBtr0072364	FBtr0072364_317	-0.548605	0.563048	-0.28934	0.891603	em02
FBtr0072364	FBtr0072364_9	-0.401792	0.573746	-0.436152	0.726832	em02
FBtr0072369	FBtr0072369_207	0.145227	0.978554	-0.554654	0.954527	em02
FBtr0072369	FBtr0072369_454	0.033845	0.991867	-0.443272	0.939323	em02
FBtr0072375	FBtr0072375_65	4.04343	0.2777	-2.25808	0.751539	em02
FBtr0072393	FBtr0072393_32	0.878427	0.6926	-2.43988	0.333583	em02
FBtr0072393	FBtr0072393_498	-1.66209	0.535594	0.100637	0.99323	em02
FBtr0072396	FBtr0072396_1064	1.40826	0.792672	2.38776	0.7626	em02
FBtr0072397	FBtr0072397_153	0.35842	0.807848	-1.02312	0.567027	em02
FBtr0072397	FBtr0072397_44	0.1764	0.916196	-0.841098	0.68029	em02
FBtr0072405	FBtr0072405_13	0.0503264	0.96514	-0.033643	0.993981	em02
FBtr0072412	FBtr0072412_10	0.539493	0.765258	-0.241542	0.95409	em02
FBtr0072423	FBtr0072423_186	-1.69675	0.456293	1.8032	0.611954	em02
FBtr0072423	FBtr0072423_243	1.37027	0.502745	-1.26381	0.70954	em02
FBtr0072427	FBtr0072427_170	6.87627	0.0580844	-8.25934	0.0665689	em02
FBtr0072435	FBtr0072435_91	0.498155	0.677255	0.138803	0.965873	em02
FBtr0072449	FBtr0072449_219	3.64817	0.00469116	-1.16158	0.671055	em02
FBtr0072464	FBtr0072464_263	1.23385	0.0228034	-1.43799	0.0538458	em02
FBtr0072464	FBtr0072464_274	1.03733	0.0249234	-1.24147	0.0604881	em02
FBtr0072480	FBtr0072480_93	-0.399057	0.916196	0.117394	0.99179	em02
FBtr0072515	FBtr0072515_146	0.319817	0.831042	-0.0571983	0.991462	em02
FBtr0072515	FBtr0072515_194	0.434557	0.634611	-0.171939	0.939038	em02
FBtr0072515	FBtr0072515_218	0.44417	0.711057	-0.181552	0.948095	em02
FBtr0072515	FBtr0072515_244	1.08102	0.452761	-0.818402	0.752878	em02
FBtr0072515	FBtr0072515_258	0.228927	0.885461	0.0336916	0.995545	em02
FBtr0072515	FBtr0072515_303	0.362385	0.655924	-0.0997663	0.965798	em02
FBtr0072515	FBtr0072515_343	0.665665	0.589359	-0.403047	0.877922	em02
FBtr0072520	FBtr0072520_147	1.16613	0.158377	-0.815153	0.581671	em02
FBtr0072520	FBtr0072520_170	1.51393	0.123346	-1.16295	0.461218	em02
FBtr0072520	FBtr0072520_186	0.382257	0.755479	-0.0312776	0.995534	em02
FBtr0072524	FBtr0072524_181	-1.88446	0.738252	0.0326103	0.998928	em02
FBtr0072524	FBtr0072524_264	-1.1361	0.807086	-0.715743	0.940441	em02
FBtr0072529	FBtr0072529_101	0.522119	0.764271	-1.37965	0.506517	em02
FBtr0072532	FBtr0072532_112	-0.913674	0.869446	0.498433	0.969551	em02
FBtr0072532	FBtr0072532_223	0.0651595	0.994232	-0.480401	0.982973	em02
FBtr0072532	FBtr0072532_515	-0.0196244	0.986072	-0.395617	0.815943	em02
FBtr0072532	FBtr0072532_622	0.811784	0.724881	-1.22702	0.716428	em02
FBtr0072532	FBtr0072532_68	1.40826	0.814752	-1.8235	0.854213	em02
FBtr0072532	FBtr0072532_722	-2.98388	0.731324	2.56864	0.877457	em02
FBtr0072534	FBtr0072534_148	-0.541341	0.961805	4.98242	0.675204	em02
FBtr0072548	FBtr0072548_73	2.21562	0.458314	-1.81829	0.732249	em02
FBtr0072548	FBtr0072548_88	2.09278	0.569973	-1.69545	0.803748	em02
FBtr0072551	FBtr0072551_150	-0.591735	0.838014	-0.456775	0.937532	em02
FBtr0072551	FBtr0072551_207	1.82328	0.487484	-2.87179	0.389752	em02
FBtr0072551	FBtr0072551_455	0.0338573	0.985003	-1.08237	0.579101	em02
FBtr0072551	FBtr0072551_508	-0.644232	0.897254	-0.404279	0.971231	em02
FBtr0072556	FBtr0072556_15	-4.64904	0.0576934	4.38118	0.18536	em02
FBtr0072556	FBtr0072556_266	-0.830953	0.579569	0.563092	0.850951	em02
FBtr0072556	FBtr0072556_270	-1.018	0.34019	0.750138	0.701271	em02
FBtr0072556	FBtr0072556_50	1.10784	0.698835	-1.3757	0.761767	em02
FBtr0072556	FBtr0072556_9	-3.01377	0.103691	2.74591	0.295692	em02
FBtr0072557	FBtr0072557_60	0.185874	0.975722	0.598874	0.95722	em02
FBtr0072558	FBtr0072558_1	5.74392	0.0952486	-5.45048	0.24651	em02
FBtr0072559	FBtr0072559_7	1.8557	0.0101172	-1.79301	0.0640236	em02
FBtr0072563	FBtr0072563_48	4.50764	0.170675	-0.963337	0.914538	em02
FBtr0072585	FBtr0072585_112	-0.399084	0.972977	-1.78724	0.933457	em02
FBtr0072585	FBtr0072585_217	-1.39902	0.904552	-0.787312	0.980159	em02
FBtr0072587	FBtr0072587_43	-4.91736	0.00309503	0.525331	0.920099	em02
FBtr0072589	FBtr0072589_291	0.513633	0.539206	-1.44031	0.145123	em02
FBtr0072589	FBtr0072589_351	0.912306	0.0348998	-1.83898	0.00196043	em02
FBtr0072593	FBtr0072593_223	-0.939675	0.723379	0.811986	0.874834	em02
FBtr0072593	FBtr0072593_234	-1.42766	0.560212	1.29997	0.757609	em02
FBtr0072593	FBtr0072593_821	0.337881	0.96514	-0.465571	0.978107	em02
FBtr0072596	FBtr0072596_7	0.566679	0.69264	-1.85954	0.210086	em02
FBtr0072597	FBtr0072597_33	0.886253	0.323962	-0.533558	0.775492	em02
FBtr0072597	FBtr0072597_41	1.7684	5.38354e-06	-1.41571	0.0199442	em02
FBtr0072597	FBtr0072597_95	1.6752	0.0280671	-1.3225	0.258534	em02
FBtr0072602	FBtr0072602_187	1.523	0.152135	-1.94505	0.178152	em02
FBtr0072602	FBtr0072602_63	-2.81405	0.428883	2.39199	0.691298	em02
FBtr0072607	FBtr0072607_22	0.941645	0.555555	-1.31725	0.564027	em02
FBtr0072607	FBtr0072607_44	2.32509	0.0137429	-2.7007	0.0203414	em02
FBtr0072610	FBtr0072610_13	0.974078	0.627519	-1.33076	0.654959	em02
FBtr0072611	FBtr0072611_204	-0.496058	0.843613	1.35654	0.683734	em02
FBtr0072611	FBtr0072611_247	-1.24709	0.815411	2.10757	0.795295	em02
FBtr0072611	FBtr0072611_96	1.40815	0.874591	-0.547669	0.981596	em02
FBtr0072639	FBtr0072639_178	-0.984049	0.8523	4.01202	0.469684	em02
FBtr0072639	FBtr0072639_187	-2.98391	0.623748	6.01189	0.413322	em02
FBtr0072639	FBtr0072639_340	2.30128	0.765773	0.726695	0.971559	em02
FBtr0072644	FBtr0072644_127	-0.411793	0.706728	0.2819	0.900195	em02
FBtr0072644	FBtr0072644_133	-0.608615	0.571439	0.478722	0.814521	em02
FBtr0072644	FBtr0072644_160	-0.804148	0.571496	0.674255	0.793401	em02
FBtr0072644	FBtr0072644_236	-0.270058	0.856681	0.140165	0.968571	em02
FBtr0072644	FBtr0072644_66	5.31508	0.000583695	-5.44498	0.00290082	em02
FBtr0072652	FBtr0072652_48	0.866558	0.295561	-1.45249	0.147875	em02
FBtr0072679	FBtr0072679_125	0.292561	0.850134	-0.0725183	0.989566	em02
FBtr0072694	FBtr0072694_198	3.90004	0.0549713	-0.992026	0.848525	em02
FBtr0072694	FBtr0072694_237	3.64519	0.194799	-0.737177	0.925227	em02
FBtr0072703	FBtr0072703_60	1.24029	0.506796	-1.44125	0.612777	em02
FBtr0072703	FBtr0072703_66	1.15044	0.569682	-1.35139	0.664836	em02
FBtr0072703	FBtr0072703_74	1.78144	0.450106	-1.98239	0.579101	em02
FBtr0072711	FBtr0072711_59	-0.968794	0.310599	0.464175	0.824003	em02
FBtr0072723	FBtr0072723_168	5.49337	0.0493337	-4.44796	0.259776	em02
FBtr0072723	FBtr0072723_294	4.95024	0.150188	-3.90483	0.460677	em02
FBtr0072723	FBtr0072723_308	2.86758	0.342203	-1.82217	0.744002	em02
FBtr0072723	FBtr0072723_312	-0.26974	0.965586	1.31515	0.881797	em02
FBtr0072723	FBtr0072723_397	3.43583	0.358483	-2.39043	0.718859	em02
FBtr0072723	FBtr0072723_663	3.82964	0.141699	-2.78423	0.505668	em02
FBtr0072729	FBtr0072729_109	0.355777	0.942647	-0.435541	0.965505	em02
FBtr0072729	FBtr0072729_24	-1.07716	0.653867	0.997395	0.815599	em02
FBtr0072729	FBtr0072729_31	-2.67589	0.254567	2.59613	0.451687	em02
FBtr0072735	FBtr0072735_168	-0.623315	0.532894	1.08602	0.460677	em02
FBtr0072735	FBtr0072735_201	0.185858	0.913537	0.276843	0.936762	em02
FBtr0072735	FBtr0072735_224	0.142795	0.969655	0.319906	0.965194	em02
FBtr0072743	FBtr0072743_182	0.145182	0.977336	-0.707353	0.936602	em02
FBtr0072743	FBtr0072743_228	-0.273559	0.955417	-0.288611	0.978371	em02
FBtr0072743	FBtr0072743_242	-0.958451	0.855747	0.39628	0.978107	em02
FBtr0072743	FBtr0072743_299	-2.38224	0.737857	1.82007	0.895831	em02
FBtr0072743	FBtr0072743_358	-2.07713	0.622326	1.51495	0.850431	em02
FBtr0072743	FBtr0072743_475	-1.6141	0.305981	1.05193	0.718765	em02
FBtr0072747	FBtr0072747_111	2.78291	0.00253499	-2.7775	0.017514	em02
FBtr0072747	FBtr0072747_1125	-1.21858	0.788731	1.22399	0.882302	em02
FBtr0072747	FBtr0072747_1279	4.24864	0.079098	-4.24323	0.187756	em02
FBtr0072747	FBtr0072747_316	1.74878	0.236963	-1.74337	0.420969	em02
FBtr0072747	FBtr0072747_322	0.974349	0.625746	-0.968936	0.778455	em02
FBtr0072747	FBtr0072747_836	0.746306	0.486801	-0.740893	0.683734	em02
FBtr0072747	FBtr0072747_883	3.16312	0.154246	-3.15771	0.301903	em02
FBtr0072754	FBtr0072754_3	-3.74221	0.220902	3.2798	0.480976	em02
FBtr0072754	FBtr0072754_9	-3.74221	0.220902	3.2798	0.480976	em02
FBtr0072757	FBtr0072757_3	-3.74221	0.220902	2.39474	0.663799	em02
FBtr0072757	FBtr0072757_9	-3.74221	0.220902	2.39474	0.663799	em02
FBtr0072759	FBtr0072759_48	-1.39904	0.762592	1.75071	0.819886	em02
FBtr0072761	FBtr0072761_42	3.99324	0.539607	0.136173	0.997641	em02
FBtr0072767	FBtr0072767_121	0.695132	0.341133	-1.65765	0.0350162	em02
FBtr0072767	FBtr0072767_128	-0.30561	0.719983	-0.656905	0.55924	em02
FBtr0072767	FBtr0072767_186	-1.03655	0.809319	0.0740349	0.997641	em02
FBtr0072767	FBtr0072767_85	0.389145	0.461614	-1.35166	0.0112519	em02
FBtr0072773	FBtr0072773_139	0.14406	0.965586	0.0711427	0.994402	em02
FBtr0072773	FBtr0072773_262	0.52641	0.799557	-0.311208	0.943831	em02
FBtr0072776	FBtr0072776_22	2.38742	0.403806	-0.221514	0.982992	em02
FBtr0072779	FBtr0072779_29	0.800138	0.525397	-0.984411	0.614877	em02
FBtr0072788	FBtr0072788_68	0.359882	0.874591	-0.204477	0.969837	em02
FBtr0072792	FBtr0072792_104	0.904084	0.677005	-0.67316	0.878721	em02
FBtr0072792	FBtr0072792_139	1.68725	0.0900709	-1.45632	0.351312	em02
FBtr0072792	FBtr0072792_312	0.103391	0.972977	0.127533	0.987633	em02
FBtr0072792	FBtr0072792_96	1.96346	0.0114485	-1.73253	0.140159	em02
FBtr0072826	FBtr0072826_180	2.60087	0.0893457	-1.32921	0.6443	em02
FBtr0072826	FBtr0072826_189	2.60985	0.123013	-1.33819	0.678407	em02
FBtr0072826	FBtr0072826_192	2.33783	0.191625	-1.06617	0.772512	em02
FBtr0072826	FBtr0072826_364	1.4507	0.302224	-0.179042	0.970271	em02
FBtr0072826	FBtr0072826_394	0.902061	0.725573	0.369599	0.949841	em02
FBtr0072828	FBtr0072828_36	1.58388	0.110325	-1.95523	0.119752	em02
FBtr0072828	FBtr0072828_447	-0.848856	0.384188	0.477514	0.813603	em02
FBtr0072828	FBtr0072828_461	-1.52369	0.00153619	1.15235	0.0955981	em02
FBtr0072831	FBtr0072831_226	0.898847	0.210342	-1.87651	0.0165861	em02
FBtr0072834	FBtr0072834_161	-0.899849	0.7084	0.249386	0.969837	em02
FBtr0072834	FBtr0072834_81	1.29849	0.2679	-1.94895	0.180003	em02
FBtr0072836	FBtr0072836_104	2.40817	0.503555	0.918242	0.911776	em02
FBtr0072842	FBtr0072842_209	-1.81408	0.797554	1.33357	0.92387	em02
FBtr0072842	FBtr0072842_228	-2.399	0.746468	1.91849	0.892463	em02
FBtr0072853	FBtr0072853_197	-0.0793121	0.979161	-0.194539	0.978107	em02
FBtr0072864	FBtr0072864_65	-1.08548	0.359605	0.644984	0.789978	em02
FBtr0072866	FBtr0072866_45	0.259863	0.895688	-1.39583	0.479844	em02
FBtr0072877	FBtr0072877_101	0.0863319	0.986095	0.112472	0.994853	em02
FBtr0072901	FBtr0072901_212	0.623929	0.450508	-1.27091	0.183778	em02
FBtr0072904	FBtr0072904_100	-1.08148	0.0014752	1.24612	0.00481739	em02
FBtr0072904	FBtr0072904_132	-0.951666	0.0116239	1.11631	0.0251939	em02
FBtr0072904	FBtr0072904_68	-1.10019	0.0374043	1.26483	0.0664232	em02
FBtr0072905	FBtr0072905_112	-0.593323	0.468855	0.466921	0.77182	em02
FBtr0072905	FBtr0072905_116	-1.86858	0.0125024	1.74218	0.095136	em02
FBtr0072905	FBtr0072905_149	-0.547096	0.502595	0.420694	0.800179	em02
FBtr0072905	FBtr0072905_3	0.167832	0.818724	-0.294234	0.823591	em02
FBtr0072913	FBtr0072913_132	1.18593	0.827542	-2.42705	0.749471	em02
FBtr0072913	FBtr0072913_30	-1.21858	0.788731	-0.0225433	0.998928	em02
FBtr0072913	FBtr0072913_37	-1.09428	0.80924	-0.146837	0.992383	em02
FBtr0072915	FBtr0072915_21	-2.05555	0.0391661	1.0796	0.556628	em02
FBtr0072915	FBtr0072915_3	-1.78041	0.0649921	0.804447	0.680696	em02
FBtr0072921	FBtr0072921_106	2.29142	0.532372	-2.74368	0.623316	em02
FBtr0072921	FBtr0072921_211	2.14302	0.585427	-2.59527	0.668272	em02
FBtr0072921	FBtr0072921_216	-0.118998	0.983723	-0.333262	0.980725	em02
FBtr0072930	FBtr0072930_84	-0.551145	0.928775	-1.30046	0.899107	em02
FBtr0072931	FBtr0072931_4	0.0733833	0.973285	0.843804	0.767887	em02
FBtr0072931	FBtr0072931_75	-2.14533	0.0102926	3.06252	0.00540173	em02
FBtr0072948	FBtr0072948_61	-2.51975	0.677288	1.78495	0.882302	em02
FBtr0072955	FBtr0072955_187	0.993205	0.691993	-0.422988	0.941184	em02
FBtr0072955	FBtr0072955_3	-0.662103	0.928775	1.23232	0.925422	em02
FBtr0072956	FBtr0072956_101	0.324749	0.669299	-0.961395	0.277069	em02
FBtr0072970	FBtr0072970_50	1.15728	0.519628	-1.91914	0.399873	em02
FBtr0072970	FBtr0072970_97	-1.11256	0.522159	0.350703	0.936762	em02
FBtr0072972	FBtr0072972_268	-0.0297408	0.979311	0.706637	0.524702	em02
FBtr0072972	FBtr0072972_78	1.49373	0.0330563	-0.816829	0.502973	em02
FBtr0072984	FBtr0072984_29	-1.22625	0.495189	0.814771	0.816374	em02
FBtr0072984	FBtr0072984_73	0.205759	0.891437	-0.617243	0.757609	em02
FBtr0072991	FBtr0072991_211	1.96563	2.06637e-07	-5.97128	0.0923558	em02
FBtr0072991	FBtr0072991_276	-0.427114	0.604575	-3.57854	0.426541	em02
FBtr0072991	FBtr0072991_284	0.54396	0.485197	-4.54961	0.255832	em02
FBtr0072991	FBtr0072991_322	-3.66666	0.187978	-0.338994	0.982992	em02
FBtr0072991	FBtr0072991_56	9.41375	2.49191e-06	-13.4194	0.000289712	em02
FBtr0072991	FBtr0072991_92	2.4954	0.000488503	-6.50105	0.0665689	em02
FBtr0073023	FBtr0073023_89	2.23235	0.0744038	-2.43455	0.136414	em02
FBtr0073035	FBtr0073035_204	1.28211	0.00582668	-1.55442	0.0154676	em02
FBtr0073035	FBtr0073035_211	4.81161	0.000160683	-5.08392	0.000720207	em02
FBtr0073035	FBtr0073035_219	1.59372	0.00153652	-1.86603	0.00498359	em02
FBtr0073043	FBtr0073043_116	1.33646	0.00667524	-1.28835	0.0483586	em02
FBtr0073063	FBtr0073063_164	0.202639	0.940812	0.18133	0.978107	em02
FBtr0073082	FBtr0073082_104	-2.33427	0.0119373	1.14812	0.480702	em02
FBtr0073082	FBtr0073082_108	-2.00542	0.243174	0.819265	0.828463	em02
FBtr0073082	FBtr0073082_122	-2.08358	0.0767832	0.897428	0.70074	em02
FBtr0073082	FBtr0073082_126	-1.70026	0.123475	0.514108	0.846342	em02
FBtr0073082	FBtr0073082_129	-1.55653	0.208499	0.370375	0.909123	em02
FBtr0073093	FBtr0073093_113	-0.937281	0.075588	0.210627	0.88625	em02
FBtr0073095	FBtr0073095_117	-0.000551649	0.999887	1.29015	0.702797	em02
FBtr0073108	FBtr0073108_66	2.90127	0.0391665	-2.0232	0.352492	em02
FBtr0073114	FBtr0073114_162	1.11037	0.30239	-2.10567	0.0875961	em02
FBtr0073118	FBtr0073118_226	0.00154945	0.999149	-0.0318995	0.996424	em02
FBtr0073118	FBtr0073118_248	0.185948	0.82776	-0.216298	0.897396	em02
FBtr0073118	FBtr0073118_33	3.02576	0.00339595	-3.05611	0.0189476	em02
FBtr0073143	FBtr0073143_196	-0.989576	0.123475	-1.21089	0.154814	em02
FBtr0073143	FBtr0073143_60	-1.45568	0.19903	-0.744789	0.739859	em02
FBtr0073145	FBtr0073145_545	5.10863	0.00604899	-1.72284	0.659906	em02
FBtr0073148	FBtr0073148_40	0.53052	0.876676	-1.3547	0.773094	em02
FBtr0073165	FBtr0073165_752	3.36533	0.59539	1.138	0.940341	em02
FBtr0073165	FBtr0073165_842	5.38218	0.0359128	-0.878853	0.904599	em02
FBtr0073165	FBtr0073165_962	3.09274	0.536489	1.41059	0.899107	em02
FBtr0073173	FBtr0073173_22	1.6954	0.250162	-1.38113	0.573276	em02
FBtr0073173	FBtr0073173_90	-0.308904	0.765149	0.623174	0.678037	em02
FBtr0073176	FBtr0073176_112	1.59811	0.00545228	-2.11502	0.00181309	em02
FBtr0073185	FBtr0073185_158	-0.399094	0.827542	-0.159864	0.973557	em02
FBtr0073185	FBtr0073185_279	0.0693741	0.975695	-0.628333	0.84155	em02
FBtr0073185	FBtr0073185_399	-0.78581	0.148386	0.226852	0.883792	em02
FBtr0073185	FBtr0073185_436	-0.878925	0.285922	0.319967	0.879116	em02
FBtr0073187	FBtr0073187_553	-0.844508	0.42489	0.702451	0.699673	em02
FBtr0073193	FBtr0073193_37	3.62835	0.547078	-4.3553	0.629433	em02
FBtr0073209	FBtr0073209_160	2.10528	5.76752e-06	-2.37081	3.26964e-05	em02
FBtr0073211	FBtr0073211_274	1.23395	0.368217	-0.0301271	0.997641	em02
FBtr0073211	FBtr0073211_417	0.990285	0.386497	0.213534	0.946517	em02
FBtr0073211	FBtr0073211_94	2.91215	0.0185011	-1.70833	0.390641	em02
FBtr0073217	FBtr0073217_151	-1.61248	0.416411	1.99228	0.482592	em02
FBtr0073217	FBtr0073217_47	2.60964	0.0181498	-2.22985	0.156452	em02
FBtr0073217	FBtr0073217_54	2.68649	0.0162612	-2.3067	0.147253	em02
FBtr0073217	FBtr0073217_76	-0.494594	0.755479	0.874388	0.70954	em02
FBtr0073231	FBtr0073231_195	4.50769	0.132135	-0.387499	0.972616	em02
FBtr0073231	FBtr0073231_67	0.507827	0.930337	3.61236	0.562345	em02
FBtr0073242	FBtr0073242_6	0.108368	0.951966	0.907792	0.629919	em02
FBtr0073245	FBtr0073245_203	-0.43863	0.924475	0.265944	0.982404	em02
FBtr0073260	FBtr0073260_150	0.600863	0.879668	1.98588	0.686218	em02
FBtr0073271	FBtr0073271_221	-0.155179	0.962167	-0.811759	0.852613	em02
FBtr0073271	FBtr0073271_443	-0.145798	0.959345	-0.82114	0.826746	em02
FBtr0073271	FBtr0073271_634	-0.532843	0.835709	-0.434095	0.933457	em02
FBtr0073271	FBtr0073271_642	3.21343	0.40537	-4.18037	0.42399	em02
FBtr0073271	FBtr0073271_675	-1.12156	0.546987	0.154619	0.980261	em02
FBtr0073271	FBtr0073271_801	0.15729	0.955681	-1.12423	0.721244	em02
FBtr0073286	FBtr0073286_102	-4.58489	0.0596514	5.47776	0.0665689	em02
FBtr0073287	FBtr0073287_47	0.387493	0.821368	-0.132222	0.978107	em02
FBtr0073287	FBtr0073287_53	0.570517	0.7555	-0.315247	0.936982	em02
FBtr0073310	FBtr0073310_147	0.617967	0.439564	-0.681017	0.585005	em02
FBtr0073310	FBtr0073310_258	-1.23565	0.0034158	1.1726	0.0375728	em02
FBtr0073310	FBtr0073310_291	1.49277	0.0561993	-1.55582	0.132088	em02
FBtr0073310	FBtr0073310_364	-0.132287	0.816937	0.0692372	0.95978	em02
FBtr0073310	FBtr0073310_415	0.0396804	0.948746	-0.10273	0.926347	em02
FBtr0073345	FBtr0073345_392	1.46587	0.667381	-2.13644	0.673223	em02
FBtr0073345	FBtr0073345_544	3.53527	0.442418	-4.20584	0.529046	em02
FBtr0073345	FBtr0073345_56	-0.763861	0.920418	0.0932943	0.997813	em02
FBtr0073345	FBtr0073345_637	1.95032	0.721139	-2.62089	0.754946	em02
FBtr0073345	FBtr0073345_644	3.10227	0.413111	-3.77284	0.480956	em02
FBtr0073345	FBtr0073345_800	0.0435391	0.997094	-0.714106	0.973315	em02
FBtr0073345	FBtr0073345_938	0.0435391	0.997094	-0.714106	0.973315	em02
FBtr0073345	FBtr0073345_990	0.86296	0.924475	-1.53353	0.923118	em02
FBtr0073348	FBtr0073348_71	0.370279	0.90144	-1.63027	0.627938	em02
FBtr0073380	FBtr0073380_6	-4.84173	0.0507399	1.97203	0.692623	em02
FBtr0073380	FBtr0073380_96	-5.67179	3.85213e-06	2.8021	0.131602	em02
FBtr0073381	FBtr0073381_160	-1.75899	0.210172	1.10576	0.664588	em02
FBtr0073387	FBtr0073387_40	4.06023	0.213719	-1.66591	0.816374	em02
FBtr0073409	FBtr0073409_82	-0.136078	0.95568	0.65613	0.843377	em02
FBtr0073409	FBtr0073409_9	-0.178864	0.921158	0.698915	0.781082	em02
FBtr0073410	FBtr0073410_144	-1.91431	6.43808e-06	0.0636907	0.978107	em02
FBtr0073410	FBtr0073410_47	-1.20457	0.0476779	-0.646055	0.599968	em02
FBtr0073422	FBtr0073422_155	-4.6717	0.425261	4.98817	0.579101	em02
FBtr0073429	FBtr0073429_3	-1.80205	0.697294	1.07196	0.909123	em02
FBtr0073440	FBtr0073440_31	-4.34946	0.0553583	4.70962	0.104651	em02
FBtr0073448	FBtr0073448_85	-1.12346	0.428315	-0.0331225	0.997614	em02
FBtr0073451	FBtr0073451_59	2.08889	0.0432044	-1.19661	0.509634	em02
FBtr0073453	FBtr0073453_224	-0.000857827	0.999149	-1.13442	0.189801	em02
FBtr0073453	FBtr0073453_651	0.388491	0.599659	-1.52376	0.043732	em02
FBtr0073453	FBtr0073453_677	-0.0157692	0.997907	-1.11951	0.882302	em02
FBtr0073454	FBtr0073454_144	-0.117018	0.877935	-0.745216	0.336361	em02
FBtr0073454	FBtr0073454_83	0.442613	0.612161	-1.30485	0.165305	em02
FBtr0073457	FBtr0073457_344	-0.414473	0.548593	-0.453848	0.704456	em02
FBtr0073457	FBtr0073457_523	0.103399	0.933719	-0.97172	0.425145	em02
FBtr0073460	FBtr0073460_45	3.52559	1.85488e-06	-2.69829	0.00648102	em02
FBtr0073475	FBtr0073475_118	-1.13419	0.025841	-0.0405333	0.989566	em02
FBtr0073480	FBtr0073480_53	1.85465	0.0630662	-2.20212	0.0836564	em02
FBtr0073480	FBtr0073480_58	1.43763	0.106608	-1.7851	0.120204	em02
FBtr0073481	FBtr0073481_123	2.75196	0.100055	-3.48695	0.0923558	em02
FBtr0073481	FBtr0073481_214	0.863916	0.679211	-1.5989	0.562849	em02
FBtr0073481	FBtr0073481_224	0.108381	0.928088	-0.843365	0.495659	em02
FBtr0073481	FBtr0073481_496	0.614696	0.769766	-1.34968	0.623316	em02
FBtr0073481	FBtr0073481_526	1.31136	0.605634	-2.04635	0.559398	em02
FBtr0073481	FBtr0073481_814	-0.158133	0.972931	-0.576851	0.939038	em02
FBtr0073481	FBtr0073481_885	3.45842	0.406823	-4.1934	0.472344	em02
FBtr0073482	FBtr0073482_37	0.926509	0.195508	-1.75395	0.0332375	em02
FBtr0073499	FBtr0073499_77	-0.898839	0.140274	1.06258	0.210086	em02
FBtr0073512	FBtr0073512_123	1.50785	0.73749	-1.70087	0.822475	em02
FBtr0073516	FBtr0073516_104	-1.45547	0.343514	1.18943	0.654556	em02
FBtr0073521	FBtr0073521_370	0.448902	0.92633	-0.368626	0.974931	em02
FBtr0073521	FBtr0073521_624	-0.118991	0.972929	0.199268	0.979178	em02
FBtr0073533	FBtr0073533_85	2.64524	0.186128	-2.75202	0.317051	em02
FBtr0073540	FBtr0073540_44	-0.42543	0.418645	0.225235	0.875047	em02
FBtr0073542	FBtr0073542_111	-0.441372	0.6291	-0.175769	0.93972	em02
FBtr0073552	FBtr0073552_178	-2.60844	0.0147715	1.89702	0.219014	em02
FBtr0073552	FBtr0073552_215	-0.508321	0.51793	-0.203104	0.914286	em02
FBtr0073552	FBtr0073552_28	-2.66209	0.600468	1.95066	0.84075	em02
FBtr0073573	FBtr0073573_122	0.935879	0.112297	-1.96655	0.0180153	em02
FBtr0073573	FBtr0073573_246	1.14297	0.0958534	-2.17365	0.0190576	em02
FBtr0073573	FBtr0073573_312	3.01761	0.20726	-4.04828	0.182604	em02
FBtr0073573	FBtr0073573_491	3.46878	0.00157868	-4.49946	0.00071313	em02
FBtr0073573	FBtr0073573_80	0.914756	0.0397994	-1.94543	0.00510864	em02
FBtr0073573	FBtr0073573_84	-0.358844	0.681225	-0.671828	0.655698	em02
FBtr0073573	FBtr0073573_96	-0.979961	0.246866	-0.0507112	0.991462	em02
FBtr0073574	FBtr0073574_230	2.26385	0.30825	0.537638	0.931193	em02
FBtr0073574	FBtr0073574_247	2.54573	0.210362	0.255756	0.973757	em02
FBtr0073579	FBtr0073579_107	1.15038	0.79231	0.273708	0.982992	em02
FBtr0073579	FBtr0073579_46	1.40823	0.465165	0.0158569	0.998928	em02
FBtr0073579	FBtr0073579_57	0.420301	0.908472	1.00378	0.865705	em02
FBtr0073579	FBtr0073579_6	5.29138	0.140189	-3.8673	0.50561	em02
FBtr0073579	FBtr0073579_81	-1.0032	0.824672	2.42729	0.683734	em02
FBtr0073579	FBtr0073579_92	1.38053	0.714457	0.0435512	0.998524	em02
FBtr0073580	FBtr0073580_286	-1.39902	0.904552	4.53906	0.779504	em02
FBtr0073580	FBtr0073580_292	-1.39902	0.904552	4.53906	0.779504	em02
FBtr0073580	FBtr0073580_373	-2.39902	0.613771	5.53906	0.319365	em02
FBtr0073580	FBtr0073580_395	-1.81406	0.746682	4.9541	0.452607	em02
FBtr0073600	FBtr0073600_120	3.76841	0.0643471	-3.48043	0.212346	em02
FBtr0073600	FBtr0073600_38	3.24112	0.0797865	-2.95315	0.254392	em02
FBtr0073602	FBtr0073602_15	2.50774	0.589741	-1.56141	0.869302	em02
FBtr0073607	FBtr0073607_223	-1.25574	0.0107187	0.362585	0.765326	em02
FBtr0073620	FBtr0073620_11	-0.814095	0.927259	0.530436	0.980725	em02
FBtr0073620	FBtr0073620_281	-0.778794	0.555992	0.495135	0.856749	em02
FBtr0073620	FBtr0073620_331	-0.892787	0.482644	0.609128	0.812177	em02
FBtr0073641	FBtr0073641_290	1.35827	0.0751759	-1.87694	0.0611915	em02
FBtr0073641	FBtr0073641_84	2.67057	2.45385e-08	-3.18924	2.53337e-07	em02
FBtr0073652	FBtr0073652_273	0.437415	0.928254	-0.66424	0.940847	em02
FBtr0073657	FBtr0073657_11	0.812357	0.825909	-0.595773	0.937532	em02
FBtr0073657	FBtr0073657_2	-0.399084	0.972977	0.615668	0.98271	em02
FBtr0073658	FBtr0073658_2	-0.223524	0.929218	-0.923435	0.791315	em02
FBtr0073658	FBtr0073658_27	-4.06408	0.11063	2.91713	0.47067	em02
FBtr0073660	FBtr0073660_218	-2.3663	7.00973e-05	0.896972	0.417031	em02
FBtr0073660	FBtr0073660_225	-2.51183	5.91718e-05	1.0425	0.341453	em02
FBtr0073660	FBtr0073660_72	-0.735658	0.665629	-0.733675	0.808944	em02
FBtr0073669	FBtr0073669_103	1.63331	0.247788	-3.03985	0.0586538	em02
FBtr0073669	FBtr0073669_223	-0.49239	0.698835	-0.914152	0.611954	em02
FBtr0073669	FBtr0073669_244	-0.488374	0.91738	-0.918167	0.908576	em02
FBtr0073669	FBtr0073669_26	0.557422	0.761933	-1.96396	0.298128	em02
FBtr0073678	FBtr0073678_828	-0.591777	0.913537	-0.329737	0.980725	em02
FBtr0073683	FBtr0073683_157	-0.125427	0.886381	-0.622019	0.564343	em02
FBtr0073691	FBtr0073691_27	6.74392	0.0109033	-7.34082	0.0232663	em02
FBtr0073692	FBtr0073692_123	0.623263	0.725115	0.273311	0.945897	em02
FBtr0073694	FBtr0073694_172	5.30459	0.0117013	-3.99693	0.181906	em02
FBtr0073695	FBtr0073695_139	-0.439713	0.90993	-2.65991	0.509986	em02
FBtr0073695	FBtr0073695_160	0.0414759	0.994232	-3.1411	0.602984	em02
FBtr0073695	FBtr0073695_98	-4.74855	0.058749	1.64893	0.761206	em02
FBtr0073704	FBtr0073704_100	-0.229186	0.969555	0.440195	0.971231	em02
FBtr0073704	FBtr0073704_241	-3.9527	0.153154	4.16371	0.259867	em02
FBtr0073704	FBtr0073704_8	0.337895	0.940662	-0.126886	0.992279	em02
FBtr0073705	FBtr0073705_30	-0.00530581	0.997907	0.105891	0.979178	em02
FBtr0073712	FBtr0073712_149	4.12443	0.386145	-0.275864	0.989566	em02
FBtr0073712	FBtr0073712_657	5.95028	0.151171	-2.10171	0.822526	em02
FBtr0073720	FBtr0073720_183	1.44682	0.0101432	-1.6483	0.0326053	em02
FBtr0073724	FBtr0073724_174	-0.67212	0.747541	-0.561303	0.897396	em02
FBtr0073730	FBtr0073730_22	1.88793	7.18588e-05	-3.43373	7.35792e-11	em02
FBtr0073747	FBtr0073747_168	3.31054	1.55677e-09	-3.84454	2.96572e-10	em02
FBtr0073747	FBtr0073747_258	6.75774	8.6653e-05	-7.29174	0.000211822	em02
FBtr0073747	FBtr0073747_290	2.41396	0.00206405	-2.94795	0.00112592	em02
FBtr0073747	FBtr0073747_303	1.78021	0.0169849	-2.31421	0.00864149	em02
FBtr0073747	FBtr0073747_414	0.798897	0.216289	-1.33289	0.0857814	em02
FBtr0073754	FBtr0073754_73	0.465936	0.879641	-1.45304	0.704489	em02
FBtr0073755	FBtr0073755_248	4.16097	0.0620183	-4.35192	0.13349	em02
FBtr0073756	FBtr0073756_126	0.795014	0.218121	-1.0153	0.24145	em02
FBtr0073756	FBtr0073756_148	-0.721015	0.796151	0.500724	0.929695	em02
FBtr0073756	FBtr0073756_172	0.656393	0.423167	-0.876684	0.44737	em02
FBtr0073756	FBtr0073756_93	1.08336	0.238144	-1.30366	0.292227	em02
FBtr0073757	FBtr0073757_120	0.696821	0.275318	-1.0595	0.200059	em02
FBtr0073757	FBtr0073757_47	1.0963	0.229495	-1.45898	0.215813	em02
FBtr0073776	FBtr0073776_273	-0.250234	0.898974	-1.09624	0.638687	em02
FBtr0073776	FBtr0073776_343	-0.956151	0.472737	-0.390322	0.903999	em02
FBtr0073779	FBtr0073779_30	-1.24711	0.731319	1.49972	0.802358	em02
FBtr0073779	FBtr0073779_81	0.240832	0.855796	0.011778	0.998524	em02
FBtr0073805	FBtr0073805_202	-2.9861	0.256844	0.394572	0.963544	em02
FBtr0073834	FBtr0073834_50	1.43097	0.140424	-1.32177	0.345734	em02
FBtr0073834	FBtr0073834_69	2.71809	0.0192947	-2.60889	0.0858691	em02
FBtr0073840	FBtr0073840_216	-0.944524	0.403103	0.470287	0.852966	em02
FBtr0073841	FBtr0073841_264	-2.66211	0.144085	2.11374	0.450374	em02
FBtr0073841	FBtr0073841_65	-0.0982851	0.915649	-0.450084	0.698107	em02
FBtr0073841	FBtr0073841_85	-0.806479	0.23228	0.25811	0.879351	em02
FBtr0073842	FBtr0073842_120	-0.470248	0.79231	-0.589732	0.846342	em02
FBtr0073843	FBtr0073843_167	-2.00527	8.29366e-05	0.23187	0.883909	em02
FBtr0073843	FBtr0073843_175	-2.07307	9.53043e-05	0.299664	0.846342	em02
FBtr0073843	FBtr0073843_185	-1.92105	0.00117001	0.147644	0.944781	em02
FBtr0073844	FBtr0073844_288	-1.12712	0.324114	0.852329	0.670308	em02
FBtr0073844	FBtr0073844_297	-1.18497	0.486222	0.910183	0.765197	em02
FBtr0073846	FBtr0073846_173	-0.248035	0.915649	1.15439	0.690192	em02
FBtr0073846	FBtr0073846_184	-0.399103	0.898414	1.30545	0.742946	em02
FBtr0073846	FBtr0073846_197	0.0629989	0.984154	0.843351	0.850431	em02
FBtr0073846	FBtr0073846_41	0.159979	0.956969	0.746371	0.856265	em02
FBtr0073846	FBtr0073846_56	-0.476263	0.874591	1.38261	0.722309	em02
FBtr0073846	FBtr0073846_76	-0.229179	0.904552	1.13553	0.612777	em02
FBtr0073846	FBtr0073846_88	-0.229179	0.904552	1.13553	0.612777	em02
FBtr0073847	FBtr0073847_19	2.9503	0.515894	-3.47223	0.614877	em02
FBtr0073847	FBtr0073847_31	2.9503	0.515894	-3.47223	0.614877	em02
FBtr0073849	FBtr0073849_12	-0.175438	0.806322	-0.417324	0.673223	em02
FBtr0073849	FBtr0073849_213	0.974004	0.359072	-1.56677	0.226374	em02
FBtr0073849	FBtr0073849_360	1.01593	0.128714	-1.60869	0.0429394	em02
FBtr0073900	FBtr0073900_29	-2.80734	0.00013457	1.73627	0.0954029	em02
FBtr0073923	FBtr0073923_482	-0.199793	0.890414	0.113754	0.975087	em02
FBtr0073946	FBtr0073946_134	1.52607	0.161071	-1.49994	0.351312	em02
FBtr0073946	FBtr0073946_147	-0.42748	0.4328	0.45361	0.683666	em02
FBtr0073946	FBtr0073946_19	-0.10163	0.946407	0.12776	0.970271	em02
FBtr0073946	FBtr0073946_50	-0.524638	0.757358	0.550768	0.859945	em02
FBtr0073946	FBtr0073946_9	-0.267866	0.899915	0.293996	0.943348	em02
FBtr0073946	FBtr0073946_94	0.0874928	0.943247	-0.0613631	0.986179	em02
FBtr0073958	FBtr0073958_128	0.308718	0.748678	-1.65238	0.0559956	em02
FBtr0073958	FBtr0073958_279	-0.590928	0.445959	-0.752737	0.514589	em02
FBtr0073958	FBtr0073958_349	-1.06955	0.244537	-0.274117	0.909123	em02
FBtr0073961	FBtr0073961_125	-5.18393	0.124492	4.64676	0.332304	em02
FBtr0073964	FBtr0073964_28	2.78144	0.101076	-2.84198	0.211537	em02
FBtr0073974	FBtr0073974_97	0.97018	0.835854	-1.02873	0.904171	em02
FBtr0073988	FBtr0073988_22	2.18959	0.229713	-1.73816	0.57161	em02
FBtr0073992	FBtr0073992_119	0.394444	0.895688	-1.42914	0.695535	em02
FBtr0074011	FBtr0074011_72	1.66174	0.105993	-2.24775	0.0735986	em02
FBtr0074011	FBtr0074011_81	1.61975	0.17101	-2.20576	0.133994	em02
FBtr0074020	FBtr0074020_27	0.60085	0.955681	0.824156	0.970943	em02
FBtr0074053	FBtr0074053_172	0.700428	0.648878	-0.600166	0.839179	em02
FBtr0074053	FBtr0074053_71	-1.4022	0.268299	1.50246	0.424012	em02
FBtr0074053	FBtr0074053_83	-1.39082	0.313015	1.49109	0.470638	em02
FBtr0074054	FBtr0074054_50	0.244756	0.905592	-1.60385	0.454219	em02
FBtr0074054	FBtr0074054_94	0.448915	0.928775	-1.80801	0.793401	em02
FBtr0074060	FBtr0074060_123	-1.75769	0.186496	-0.263688	0.947818	em02
FBtr0074060	FBtr0074060_142	-1.98404	0.38949	-0.0373455	0.997813	em02
FBtr0074063	FBtr0074063_399	2.59521	0.195702	-0.235316	0.975087	em02
FBtr0074063	FBtr0074063_502	6.1243	0.0180789	-3.76441	0.346475	em02
FBtr0074064	FBtr0074064_347	4.36529	0.405736	0.200807	0.993981	em02
FBtr0074064	FBtr0074064_433	0.770774	0.90257	3.79532	0.599173	em02
FBtr0074064	FBtr0074064_439	0.770774	0.90257	3.79532	0.599173	em02
FBtr0074064	FBtr0074064_476	2.47528	0.517742	2.09081	0.773094	em02
FBtr0074072	FBtr0074072_166	1.57711	0.212323	-2.68143	0.140983	em02
FBtr0074072	FBtr0074072_315	0.996202	0.792215	-2.10052	0.691701	em02
FBtr0074072	FBtr0074072_370	-4.95719	0.0334533	3.85287	0.272483	em02
FBtr0074072	FBtr0074072_420	-0.668686	0.831002	-0.435635	0.949841	em02
FBtr0074072	FBtr0074072_461	0.301351	0.955681	-1.40567	0.852966	em02
FBtr0074077	FBtr0074077_87	-0.572536	0.718066	-0.26537	0.940155	em02
FBtr0074085	FBtr0074085_144	0.282724	0.899701	-0.578023	0.875082	em02
FBtr0074090	FBtr0074090_59	5.62845	0.0246999	-5.4554	0.0928657	em02
FBtr0074097	FBtr0074097_53	5.74391	0.222011	-6.52852	0.297579	em02
FBtr0074104	FBtr0074104_53	1.0445	0.334455	-0.667664	0.743431	em02
FBtr0074106	FBtr0074106_147	-0.504143	0.300619	0.133969	0.932003	em02
FBtr0074106	FBtr0074106_187	-0.712537	0.0363008	0.342363	0.699673	em02
FBtr0074106	FBtr0074106_37	1.48901	1.04031e-07	-1.85918	1.63725e-05	em02
FBtr0074114	FBtr0074114_152	3.6131	0.0257974	-4.71389	0.0129557	em02
FBtr0074114	FBtr0074114_158	1.68105	0.210342	-2.78185	0.0735986	em02
FBtr0074114	FBtr0074114_275	1.01409	0.44294	-2.11489	0.155598	em02
FBtr0074114	FBtr0074114_34	3.04343	0.384949	-4.14423	0.366606	em02
FBtr0074114	FBtr0074114_366	-1.47064	0.553214	0.369838	0.954527	em02
FBtr0074114	FBtr0074114_401	0.773016	0.259917	-1.87381	0.0107676	em02
FBtr0074114	FBtr0074114_464	-0.729247	0.304768	-0.371551	0.808749	em02
FBtr0074114	FBtr0074114_545	-1.07491	0.235165	-0.0258883	0.996424	em02
FBtr0074114	FBtr0074114_56	1.11183	0.634611	-2.21263	0.439805	em02
FBtr0074114	FBtr0074114_74	0.185848	0.95889	-1.28665	0.757439	em02
FBtr0074114	FBtr0074114_90	-0.56286	0.60253	-0.537938	0.778404	em02
FBtr0074117	FBtr0074117_7	-0.0205896	0.997827	0.746984	0.946747	em02
FBtr0074130	FBtr0074130_218	2.55084	0.0478141	-2.76584	0.0936988	em02
FBtr0074130	FBtr0074130_265	-0.219854	0.814752	0.00485914	0.998928	em02
FBtr0074130	FBtr0074130_284	-0.277377	0.784353	0.062382	0.983233	em02
FBtr0074130	FBtr0074130_314	1.11386	0.109506	-1.32885	0.147985	em02
FBtr0074130	FBtr0074130_356	1.77181	0.118786	-1.98681	0.181906	em02
FBtr0074130	FBtr0074130_576	0.168085	0.857407	-0.38308	0.78285	em02
FBtr0074134	FBtr0074134_71	0.13582	0.928254	-0.217216	0.944781	em02
FBtr0074135	FBtr0074135_107	1.87035	0.0167166	-2.59262	0.00909501	em02
FBtr0074140	FBtr0074140_109	-0.254832	0.878351	-0.960867	0.625185	em02
FBtr0074140	FBtr0074140_267	-0.483817	0.684633	-0.731882	0.67892	em02
FBtr0074140	FBtr0074140_98	-0.0605763	0.974141	-1.15512	0.521281	em02
FBtr0074144	FBtr0074144_15	1.57398	0.0131879	-2.24451	0.00440455	em02
FBtr0074144	FBtr0074144_361	0.692344	0.00813709	-1.36287	0.00114427	em02
FBtr0074144	FBtr0074144_448	0.349595	0.229599	-1.02012	0.025454	em02
FBtr0074144	FBtr0074144_46	1.46654	0.000284119	-2.13706	6.51413e-05	em02
FBtr0074144	FBtr0074144_525	-0.213808	0.777631	-0.456719	0.699263	em02
FBtr0074144	FBtr0074144_829	-0.638226	0.00932936	-0.0323012	0.983845	em02
FBtr0074159	FBtr0074159_149	-0.772405	0.281034	0.260928	0.89	em02
FBtr0074159	FBtr0074159_73	1.48866	0.00279181	-2.00014	0.00177625	em02
FBtr0074166	FBtr0074166_126	1.2664	0.0290259	-1.10233	0.200028	em02
FBtr0074166	FBtr0074166_166	0.580407	0.125432	-0.416335	0.595188	em02
FBtr0074166	FBtr0074166_206	-0.386999	0.543917	0.551071	0.585005	em02
FBtr0074166	FBtr0074166_9	2.09834	0.35306	-1.93427	0.593168	em02
FBtr0074167	FBtr0074167_116	-0.163472	0.895276	-1.10473	0.332304	em02
FBtr0074167	FBtr0074167_133	-0.871375	0.407963	-0.396824	0.869009	em02
FBtr0074167	FBtr0074167_185	-2.36778	0.497672	1.09958	0.884426	em02
FBtr0074167	FBtr0074167_19	1.79728	0.477428	-3.06548	0.319826	em02
FBtr0074167	FBtr0074167_193	-0.5026	0.81284	-0.765599	0.8195	em02
FBtr0074167	FBtr0074167_273	3.62837	0.467018	-4.89657	0.469632	em02
FBtr0074167	FBtr0074167_281	0.301321	0.94128	-1.56952	0.752878	em02
FBtr0074167	FBtr0074167_70	1.01589	0.835213	-2.28409	0.727786	em02
FBtr0074167	FBtr0074167_95	-0.273569	0.782087	-0.99463	0.342886	em02
FBtr0074168	FBtr0074168_64	1.18577	0.899701	-1.39546	0.936762	em02
FBtr0074169	FBtr0074169_173	-4.01939	0.142473	4.04687	0.275043	em02
FBtr0074169	FBtr0074169_202	-0.422907	0.156823	0.450384	0.375694	em02
FBtr0074169	FBtr0074169_311	-0.0811119	0.913537	0.108589	0.942582	em02
FBtr0074169	FBtr0074169_50	0.581445	0.470854	-0.553968	0.686218	em02
FBtr0074169	FBtr0074169_85	2.95403	0.000173578	-2.92655	0.00196043	em02
FBtr0074174	FBtr0074174_104	2.89708	0.0017578	-2.96833	0.00909501	em02
FBtr0074174	FBtr0074174_123	-0.814162	0.82776	0.742906	0.914379	em02
FBtr0074174	FBtr0074174_21	1.18586	0.372038	-1.25712	0.534086	em02
FBtr0074174	FBtr0074174_212	1.49922	0.017177	-1.57048	0.0586257	em02
FBtr0074174	FBtr0074174_314	1.07382	0.486222	-1.14507	0.638687	em02
FBtr0074174	FBtr0074174_332	-0.118993	0.928775	0.0477366	0.991462	em02
FBtr0074174	FBtr0074174_36	1.17165	0.37961	-1.2429	0.541266	em02
FBtr0074174	FBtr0074174_407	-0.187595	0.868818	0.116338	0.965194	em02
FBtr0074174	FBtr0074174_414	0.373452	0.540664	-0.444709	0.665947	em02
FBtr0074174	FBtr0074174_421	0.269592	0.696232	-0.340849	0.778404	em02
FBtr0074174	FBtr0074174_435	0.591339	0.31742	-0.662596	0.470638	em02
FBtr0074174	FBtr0074174_499	0.457535	0.723086	-0.528792	0.811964	em02
FBtr0074178	FBtr0074178_3	-0.814172	0.86995	1.79241	0.802358	em02
FBtr0074179	FBtr0074179_179	0.836946	0.140708	-0.610687	0.612777	em02
FBtr0074183	FBtr0074183_14	-0.42114	0.835487	1.52466	0.498834	em02
FBtr0074183	FBtr0074183_24	2.67283	0.10928	-1.56931	0.602209	em02
FBtr0074183	FBtr0074183_54	-2.22659	0.294407	3.33011	0.201076	em02
FBtr0074183	FBtr0074183_92	1.09342	0.286457	0.0100969	0.998928	em02
FBtr0074184	FBtr0074184_149	7.40277	0.000769348	-7.24276	0.00654147	em02
FBtr0074185	FBtr0074185_137	-1.39902	0.904552	0.605061	0.983845	em02
FBtr0074190	FBtr0074190_205	0.391535	0.711134	-0.44331	0.818296	em02
FBtr0074190	FBtr0074190_302	-0.864194	0.0450332	0.812419	0.271424	em02
FBtr0074190	FBtr0074190_403	-0.208977	0.811054	0.157203	0.937532	em02
FBtr0074190	FBtr0074190_420	0.159733	0.844855	-0.211507	0.897437	em02
FBtr0074201	FBtr0074201_11	0.00978093	0.995015	-1.08846	0.447154	em02
FBtr0074201	FBtr0074201_6	0.0159361	0.996649	-1.09462	0.77988	em02
FBtr0074202	FBtr0074202_90	1.97009	0.184485	-2.10889	0.297579	em02
FBtr0074203	FBtr0074203_57	-0.718429	0.691524	-0.0653675	0.992279	em02
FBtr0074209	FBtr0074209_65	0.705581	0.660411	-1.26391	0.561801	em02
FBtr0074226	FBtr0074226_146	-1.15392	0.718029	0.670373	0.920099	em02
FBtr0074226	FBtr0074226_39	-1.96445	0.136487	1.48091	0.492624	em02
FBtr0074230	FBtr0074230_163	-1.82609	0.269724	0.983591	0.760126	em02
FBtr0074230	FBtr0074230_226	-0.5222	0.719661	-0.320297	0.914298	em02
FBtr0074237	FBtr0074237_146	-0.596328	0.686478	-0.156889	0.971231	em02
FBtr0074240	FBtr0074240_17	-0.562617	0.909172	0.166213	0.991562	em02
FBtr0074241	FBtr0074241_81	2.33798	0.634611	-2.79105	0.713492	em02
FBtr0074255	FBtr0074255_400	1.82967	0.439692	-3.9723	0.12617	em02
FBtr0074255	FBtr0074255_406	2.99458	0.292403	-5.13721	0.117874	em02
FBtr0074255	FBtr0074255_459	-2.27624	0.0915417	0.133606	0.980725	em02
FBtr0074255	FBtr0074255_545	-1.49222	0.586631	-0.650411	0.914392	em02
FBtr0074255	FBtr0074255_569	-0.393553	0.841338	-1.74908	0.371428	em02
FBtr0074255	FBtr0074255_807	-0.951642	0.718136	-1.19099	0.779199	em02
FBtr0074255	FBtr0074255_944	-5.34423	0.0203881	3.2016	0.37711	em02
FBtr0074255	FBtr0074255_952	-3.12155	0.105667	0.978921	0.827188	em02
FBtr0074261	FBtr0074261_100	0.670925	0.084991	-1.17784	0.0418181	em02
FBtr0074261	FBtr0074261_142	0.665361	0.142254	-1.17227	0.069725	em02
FBtr0074261	FBtr0074261_92	0.359138	0.785233	-0.86605	0.625185	em02
FBtr0074268	FBtr0074268_146	-1.39902	0.857178	2.04877	0.877535	em02
FBtr0074268	FBtr0074268_235	-0.98401	0.899701	1.63376	0.899107	em02
FBtr0074268	FBtr0074268_243	-1.39902	0.879801	2.04877	0.897396	em02
FBtr0074268	FBtr0074268_60	0.600879	0.927259	0.0488744	0.998524	em02
FBtr0074271	FBtr0074271_6	4.04338	0.472986	-1.02572	0.94479	em02
FBtr0074285	FBtr0074285_114	-0.704974	0.0668502	0.355689	0.690192	em02
FBtr0074285	FBtr0074285_123	-1.14713	0.004349	0.797844	0.240594	em02
FBtr0074285	FBtr0074285_231	-0.332065	0.517963	-0.0172204	0.995233	em02
FBtr0074285	FBtr0074285_267	-0.0231143	0.979161	-0.326171	0.791199	em02
FBtr0074286	FBtr0074286_533	-1.09987	0.073742	-0.199443	0.911012	em02
FBtr0074286	FBtr0074286_736	-2.65108	7.20244e-05	1.35177	0.191308	em02
FBtr0074290	FBtr0074290_15	4.45258	0.0595802	-4.77069	0.115386	em02
FBtr0074294	FBtr0074294_116	-0.682812	0.380819	-0.235469	0.90641	em02
FBtr0074296	FBtr0074296_68	2.62848	0.737555	-2.1708	0.883682	em02
FBtr0074305	FBtr0074305_55	2.07542	0.157007	-2.25165	0.252601	em02
FBtr0074307	FBtr0074307_202	-0.276244	0.856257	0.232132	0.939038	em02
FBtr0074307	FBtr0074307_71	2.13431	0.15396	-2.17842	0.284961	em02
FBtr0074314	FBtr0074314_149	0.290374	0.807939	-1.53112	0.158292	em02
FBtr0074314	FBtr0074314_169	-0.485272	0.844855	-0.755475	0.849711	em02
FBtr0074314	FBtr0074314_190	0.0416733	0.983576	-1.28242	0.509332	em02
FBtr0074314	FBtr0074314_222	-0.606939	0.563328	-0.633808	0.714541	em02
FBtr0074314	FBtr0074314_35	0.78532	0.366351	-2.02607	0.0270281	em02
FBtr0074314	FBtr0074314_420	0.878877	0.391508	-2.11962	0.0537484	em02
FBtr0074334	FBtr0074334_77	3.40825	0.617734	-3.02074	0.803748	em02
FBtr0074342	FBtr0074342_3	-2.03616	0.110015	2.35729	0.162262	em02
FBtr0074342	FBtr0074342_44	0.219413	0.831123	0.101719	0.971231	em02
FBtr0074348	FBtr0074348_90	1.96346	0.0889379	-3.83188	0.00181309	em02
FBtr0074348	FBtr0074348_96	-0.197446	0.947071	-1.67098	0.583454	em02
FBtr0074352	FBtr0074352_1	2.78039	0.577707	-1.36092	0.899107	em02
FBtr0074355	FBtr0074355_25	2.62318	0.214347	-1.14329	0.799457	em02
FBtr0074359	FBtr0074359_363	-1.80044	0.555624	1.70565	0.738363	em02
FBtr0074359	FBtr0074359_379	-2.86612	0.451798	2.77134	0.651198	em02
FBtr0074359	FBtr0074359_385	0.571147	0.699246	-0.665935	0.791315	em02
FBtr0074359	FBtr0074359_427	0.692778	0.595189	-0.787566	0.70911	em02
FBtr0074359	FBtr0074359_61	2.00081	0.299688	-2.0956	0.455173	em02
FBtr0074365	FBtr0074365_206	-4.56897	0.0442416	2.68119	0.480956	em02
FBtr0074365	FBtr0074365_67	-2.98406	0.215309	1.09628	0.843377	em02
FBtr0074372	FBtr0074372_122	-0.269819	0.90018	-0.915585	0.738749	em02
FBtr0074372	FBtr0074372_131	-0.240673	0.911561	-0.94473	0.732249	em02
FBtr0074372	FBtr0074372_322	-0.412903	0.845382	-0.772501	0.811905	em02
FBtr0074372	FBtr0074372_391	-2.49858	0.335873	1.31318	0.803152	em02
FBtr0074372	FBtr0074372_397	-3.30591	0.24338	2.1205	0.678407	em02
FBtr0074372	FBtr0074372_62	-0.148804	0.947147	-1.0366	0.683734	em02
FBtr0074386	FBtr0074386_188	0.26381	0.727223	-1.06439	0.178152	em02
FBtr0074386	FBtr0074386_391	-1.50867	0.111874	0.708091	0.710287	em02
FBtr0074386	FBtr0074386_45	1.55989	0.15169	-2.36047	0.0701577	em02
FBtr0074417	FBtr0074417_133	0.874324	0.531869	-1.45632	0.417031	em02
FBtr0074417	FBtr0074417_27	0.732134	0.775946	-1.31413	0.71625	em02
FBtr0074464	FBtr0074464_133	2.15341	0.251548	-4.322	0.0429887	em02
FBtr0074464	FBtr0074464_316	-2.84174	0.339547	0.673142	0.933665	em02
FBtr0074464	FBtr0074464_322	-1.2788	0.589919	-0.889791	0.850431	em02
FBtr0074465	FBtr0074465_50	1.34291	0.31505	-1.96214	0.239453	em02
FBtr0074476	FBtr0074476_219	-1.67175	0.789811	1.65669	0.883682	em02
FBtr0074476	FBtr0074476_264	0.995169	0.428446	-1.01024	0.619044	em02
FBtr0074476	FBtr0074476_330	2.21153	0.000803083	-2.2266	0.00798835	em02
FBtr0074480	FBtr0074480_24	-1.85984	0.004405	0.541071	0.702808	em02
FBtr0074486	FBtr0074486_15	1.85583	0.0432044	-1.26482	0.398536	em02
FBtr0074487	FBtr0074487_355	-0.136049	0.962911	1.3962	0.63662	em02
FBtr0074492	FBtr0074492_23	-1.39902	0.904552	3.44172	0.846342	em02
FBtr0074492	FBtr0074492_29	-1.39902	0.904552	3.44172	0.846342	em02
FBtr0074492	FBtr0074492_92	3.34034	0.153827	-1.29764	0.803748	em02
FBtr0074527	FBtr0074527_103	0.235904	0.845979	-0.744041	0.617086	em02
FBtr0074530	FBtr0074530_93	-0.399084	0.972977	-0.217276	0.995651	em02
FBtr0074540	FBtr0074540_52	-0.369335	0.891776	-2.6144	0.269641	em02
FBtr0074555	FBtr0074555_104	-0.407703	0.79404	-0.361434	0.906555	em02
FBtr0074555	FBtr0074555_334	-1.66078	0.263205	0.891647	0.765009	em02
FBtr0074581	FBtr0074581_113	0.185839	0.982454	0.098158	0.997813	em02
FBtr0074581	FBtr0074581_653	0.408216	0.962911	-0.12422	0.997641	em02
FBtr0074612	FBtr0074612_87	-1.52336	0.070225	-0.266497	0.909481	em02
FBtr0074617	FBtr0074617_143	3.50775	0.22698	-0.0531189	0.997813	em02
FBtr0074617	FBtr0074617_159	0.600953	0.914035	2.85368	0.682809	em02
FBtr0074617	FBtr0074617_363	5.1309	0.298811	-1.67628	0.890589	em02
FBtr0074622	FBtr0074622_160	-0.45741	0.783655	-0.00728326	0.998928	em02
FBtr0074623	FBtr0074623_147	1.09789	0.610621	-0.884973	0.826234	em02
FBtr0074623	FBtr0074623_308	0.972665	0.556667	-0.759744	0.809214	em02
FBtr0074623	FBtr0074623_425	2.65525	0.0618704	-2.44233	0.216533	em02
FBtr0074623	FBtr0074623_60	1.04288	0.324525	-0.829962	0.664094	em02
FBtr0074623	FBtr0074623_63	1.10283	0.31356	-0.889907	0.647575	em02
FBtr0074623	FBtr0074623_96	0.560251	0.708441	-0.347331	0.911811	em02
FBtr0074635	FBtr0074635_11	-1.41116	0.474628	0.986982	0.792881	em02
FBtr0074635	FBtr0074635_22	1.45331	0.493718	-1.87748	0.539342	em02
FBtr0074643	FBtr0074643_64	1.13879	0.374103	-1.7209	0.280605	em02
FBtr0074647	FBtr0074647_140	0.480192	0.619504	-0.768141	0.573518	em02
FBtr0074655	FBtr0074655_113	2.76235	0.0423206	-2.353	0.218241	em02
FBtr0074666	FBtr0074666_52	1.97012	0.0309091	-1.63111	0.216873	em02
FBtr0074671	FBtr0074671_261	-0.399105	0.933361	-0.281783	0.980725	em02
FBtr0074684	FBtr0074684_456	-0.511548	0.895424	0.491582	0.946517	em02
FBtr0074684	FBtr0074684_600	-0.879667	0.804246	0.8597	0.895321	em02
FBtr0074684	FBtr0074684_623	-0.96715	0.86604	0.947184	0.93081	em02
FBtr0074684	FBtr0074684_728	1.21559	0.620532	-1.23556	0.7626	em02
FBtr0074684	FBtr0074684_844	1.01591	0.788042	-1.03587	0.880904	em02
FBtr0074687	FBtr0074687_180	1.60079	0.853001	-0.932854	0.962695	em02
FBtr0074687	FBtr0074687_193	1.18577	0.899701	-0.517842	0.982992	em02
FBtr0074687	FBtr0074687_826	2.00588	0.44649	-1.33795	0.822979	em02
FBtr0074687	FBtr0074687_83	-0.472379	0.939895	1.14031	0.914557	em02
FBtr0074687	FBtr0074687_958	0.0483625	0.992475	0.619569	0.953849	em02
FBtr0074689	FBtr0074689_20	-4.10468	0.188578	3.32418	0.493606	em02
FBtr0074707	FBtr0074707_132	-0.0361021	0.982037	-1.43512	0.25626	em02
FBtr0074707	FBtr0074707_503	2.31897	0.0272272	-3.79019	0.000967325	em02
FBtr0074707	FBtr0074707_555	-3.27865	9.86707e-08	1.80743	0.0330389	em02
FBtr0074707	FBtr0074707_677	0.224482	0.863604	-1.6957	0.117874	em02
FBtr0074707	FBtr0074707_84	-1.53088	0.041513	0.0596655	0.986984	em02
FBtr0074711	FBtr0074711_28	0.575817	0.899701	-0.935476	0.901918	em02
FBtr0074721	FBtr0074721_272	-0.309347	0.856928	-0.261247	0.939038	em02
FBtr0074721	FBtr0074721_320	-1.67472	0.426352	1.10413	0.782484	em02
FBtr0074721	FBtr0074721_361	-3.46944	0.130842	2.89885	0.393252	em02
FBtr0074721	FBtr0074721_414	3.34905	0.178722	-3.91965	0.222486	em02
FBtr0074721	FBtr0074721_650	-0.200803	0.883198	-0.36979	0.868716	em02
FBtr0074746	FBtr0074746_141	-1.52471	0.742817	0.730614	0.943366	em02
FBtr0074750	FBtr0074750_59	-1.36191	0.00736974	-0.584232	0.597909	em02
FBtr0074753	FBtr0074753_23	2.35576	0.264558	-3.15637	0.240542	em02
FBtr0074754	FBtr0074754_119	-1.06313	0.0311903	0.619265	0.473653	em02
FBtr0074754	FBtr0074754_9	1.06033	0.31505	-1.5042	0.259866	em02
FBtr0074758	FBtr0074758_220	0.448897	0.911869	-0.606226	0.938396	em02
FBtr0074758	FBtr0074758_407	1.99326	0.742156	-2.15059	0.840385	em02
FBtr0074759	FBtr0074759_101	-0.270012	0.766916	-0.177623	0.929695	em02
FBtr0074759	FBtr0074759_112	0.769482	0.474033	-1.21712	0.389609	em02
FBtr0074760	FBtr0074760_43	-1.22918	0.380995	0.42479	0.89937	em02
FBtr0074768	FBtr0074768_41	0.308114	0.820381	-1.20167	0.400411	em02
FBtr0074771	FBtr0074771_104	-0.877013	0.0395236	0.176164	0.909123	em02
FBtr0074771	FBtr0074771_157	-0.627023	0.0268229	-0.0738263	0.963544	em02
FBtr0074771	FBtr0074771_321	0.161817	0.667481	-0.862667	0.140268	em02
FBtr0074771	FBtr0074771_334	0.171792	0.784361	-0.872641	0.259683	em02
FBtr0074771	FBtr0074771_344	-2.36305	2.40123e-05	1.6622	0.0538458	em02
FBtr0074771	FBtr0074771_491	-0.738947	0.85902	0.0380977	0.998524	em02
FBtr0074771	FBtr0074771_95	-0.04746	0.963214	-0.653389	0.573214	em02
FBtr0074775	FBtr0074775_149	2.52366	0.412893	-3.21579	0.447166	em02
FBtr0074795	FBtr0074795_141	1.30316	0.219811	-0.891237	0.637367	em02
FBtr0074800	FBtr0074800_103	-1.92454	0.370233	1.15598	0.781753	em02
FBtr0074800	FBtr0074800_114	-1.72103	0.726287	0.952474	0.926399	em02
FBtr0074800	FBtr0074800_296	-0.936525	0.310223	0.167973	0.948782	em02
FBtr0074800	FBtr0074800_43	-1.26534	0.495189	0.496789	0.907913	em02
FBtr0074804	FBtr0074804_223	-0.350804	0.692624	-0.354927	0.844708	em02
FBtr0074804	FBtr0074804_258	-0.176708	0.892501	-0.529023	0.782425	em02
FBtr0074804	FBtr0074804_277	-0.20199	0.883534	-0.503741	0.814521	em02
FBtr0074804	FBtr0074804_287	-0.662134	0.655343	-0.0435973	0.994853	em02
FBtr0074804	FBtr0074804_299	-0.195234	0.927051	-0.510497	0.883682	em02
FBtr0074804	FBtr0074804_313	1.45332	0.306364	-2.15905	0.233907	em02
FBtr0074804	FBtr0074804_319	1.24133	0.416973	-1.94707	0.324261	em02
FBtr0074804	FBtr0074804_348	0.409369	0.615648	-1.1151	0.268213	em02
FBtr0074804	FBtr0074804_725	0.661884	0.684033	-1.36761	0.519668	em02
FBtr0074804	FBtr0074804_877	0.263026	0.894752	-0.968758	0.694642	em02
FBtr0074807	FBtr0074807_223	0.983189	0.0700422	-2.26617	0.000449786	em02
FBtr0074807	FBtr0074807_836	-0.122242	0.864165	-1.16073	0.0922798	em02
FBtr0074807	FBtr0074807_866	-0.713361	0.0188752	-0.569615	0.399873	em02
FBtr0074807	FBtr0074807_906	-1.86726	0.591658	0.584281	0.945845	em02
FBtr0074810	FBtr0074810_258	-1.13815	0.113737	1.19373	0.238049	em02
FBtr0074812	FBtr0074812_165	1.75284	0.648239	0.808084	0.925541	em02
FBtr0074825	FBtr0074825_110	-0.35019	0.676613	-0.11795	0.956684	em02
FBtr0074825	FBtr0074825_124	0.300231	0.679883	-0.768371	0.381326	em02
FBtr0074825	FBtr0074825_277	1.8494	0.0417962	-2.31754	0.0376263	em02
FBtr0074825	FBtr0074825_353	2.54918	0.00415427	-3.01732	0.00436779	em02
FBtr0074825	FBtr0074825_77	0.125395	0.889896	-0.593535	0.569851	em02
FBtr0074837	FBtr0074837_70	1.18135	0.0102285	-1.3849	0.0373534	em02
FBtr0074839	FBtr0074839_470	0.864433	0.0358439	-1.0407	0.132992	em02
FBtr0074840	FBtr0074840_126	0.316555	0.703033	-0.377065	0.791199	em02
FBtr0074846	FBtr0074846_74	0.073386	0.955681	-0.801207	0.526659	em02
FBtr0074847	FBtr0074847_1	1.77081	0.238673	-1.02483	0.717517	em02
FBtr0074847	FBtr0074847_13	1.70369	0.265611	-0.957717	0.745043	em02
FBtr0074848	FBtr0074848_206	5.50279	0.205589	-1.47799	0.896967	em02
FBtr0074850	FBtr0074850_142	-0.229173	0.963813	-0.253064	0.98271	em02
FBtr0074850	FBtr0074850_153	-0.700754	0.554837	0.218518	0.942582	em02
FBtr0074850	FBtr0074850_229	-1.72105	0.611559	1.23882	0.849247	em02
FBtr0074850	FBtr0074850_51	-1.18635	0.757668	0.704112	0.930651	em02
FBtr0074864	FBtr0074864_159	-2.09949	0.70235	0.638384	0.965194	em02
FBtr0074864	FBtr0074864_195	3.04343	0.653184	-4.50454	0.644829	em02
FBtr0074864	FBtr0074864_277	-0.206437	0.977249	-1.25467	0.910841	em02
FBtr0074873	FBtr0074873_100	-0.219776	0.855261	-1.02766	0.419147	em02
FBtr0074873	FBtr0074873_173	-1.11458	0.343557	-0.132857	0.975087	em02
FBtr0074881	FBtr0074881_55	0.100799	0.943064	-1.15242	0.349794	em02
FBtr0074882	FBtr0074882_119	0.405173	0.513237	-1.17668	0.0770187	em02
FBtr0074882	FBtr0074882_20	0.510736	0.568698	-1.28224	0.193357	em02
FBtr0074882	FBtr0074882_292	-0.799029	0.13724	0.0275226	0.99179	em02
FBtr0074882	FBtr0074882_81	0.71052	0.486548	-1.48203	0.206843	em02
FBtr0074882	FBtr0074882_93	-0.159579	0.85388	-0.611927	0.546687	em02
FBtr0074891	FBtr0074891_115	-0.53157	0.518968	-0.207073	0.914451	em02
FBtr0074891	FBtr0074891_6	-0.644232	0.897254	-0.0944119	0.996424	em02
FBtr0074894	FBtr0074894_51	1.88075	0.0293661	-2.10293	0.0592398	em02
FBtr0074900	FBtr0074900_153	-1.29954	0.746961	2.42	0.672278	em02
FBtr0074900	FBtr0074900_216	-1.13604	0.861789	2.2565	0.8195	em02
FBtr0074900	FBtr0074900_87	0.638354	0.832092	0.482113	0.939282	em02
FBtr0074902	FBtr0074902_123	-0.69368	0.179813	0.133323	0.936602	em02
FBtr0074902	FBtr0074902_138	-0.652533	0.266265	0.0921762	0.965194	em02
FBtr0074902	FBtr0074902_181	0.371267	0.671884	-0.931625	0.37837	em02
FBtr0074902	FBtr0074902_226	1.62326	0.181795	-2.18361	0.153896	em02
FBtr0074903	FBtr0074903_12	-2.41852	0.419414	3.00181	0.472344	em02
FBtr0074903	FBtr0074903_22	0.860485	0.0463154	-0.277195	0.799101	em02
FBtr0074903	FBtr0074903_29	0.817743	0.0793213	-0.234453	0.849247	em02
FBtr0074903	FBtr0074903_36	0.727221	0.330424	-0.14393	0.946517	em02
FBtr0074908	FBtr0074908_77	-1.67175	0.789811	1.09233	0.932878	em02
FBtr0074917	FBtr0074917_136	-0.0612296	0.983576	0.280449	0.96206	em02
FBtr0074917	FBtr0074917_144	-0.662157	0.78581	0.881377	0.82399	em02
FBtr0074917	FBtr0074917_202	-0.798193	0.702811	1.01741	0.756638	em02
FBtr0074917	FBtr0074917_22	2.26583	0.663961	-2.04661	0.826335	em02
FBtr0074917	FBtr0074917_329	1.18285	0.0865745	-0.963635	0.36874	em02
FBtr0074917	FBtr0074917_339	1.11969	0.0683575	-0.900473	0.347316	em02
FBtr0074917	FBtr0074917_350	1.14863	0.200784	-0.929414	0.529046	em02
FBtr0074917	FBtr0074917_45	1.82967	0.427877	-1.61045	0.678037	em02
FBtr0074917	FBtr0074917_54	1.87031	0.427214	-1.65109	0.676177	em02
FBtr0074917	FBtr0074917_71	1.2238	0.501655	-1.00458	0.753416	em02
FBtr0074917	FBtr0074917_86	1.18583	0.547243	-0.966614	0.787182	em02
FBtr0074918	FBtr0074918_34	-0.0365347	0.990931	-0.461232	0.936762	em02
FBtr0074920	FBtr0074920_164	-1.01263	0.208307	0.247172	0.909481	em02
FBtr0074920	FBtr0074920_185	-1.96555	0.0160567	1.20009	0.368566	em02
FBtr0074921	FBtr0074921_373	-0.378368	0.479636	-0.208867	0.877535	em02
FBtr0074921	FBtr0074921_401	-0.619559	0.184621	0.0323234	0.989917	em02
FBtr0074924	FBtr0074924_58	1.19275	0.427381	-1.82237	0.350083	em02
FBtr0074924	FBtr0074924_78	1.49781	0.237784	-2.12743	0.186993	em02
FBtr0074938	FBtr0074938_12	-0.662097	0.874614	0.74483	0.922466	em02
FBtr0074947	FBtr0074947_102	-0.846663	0.074604	0.680052	0.432649	em02
FBtr0074953	FBtr0074953_380	2.23313	0.610558	2.07212	0.78855	em02
FBtr0074963	FBtr0074963_154	-0.662176	0.858997	-0.892812	0.889261	em02
FBtr0074963	FBtr0074963_246	0.463377	0.935613	-2.01836	0.792867	em02
FBtr0074989	FBtr0074989_151	1.4802	0.00942684	-1.30248	0.130191	em02
FBtr0074989	FBtr0074989_223	2.60022	0.00274685	-2.42249	0.0354599	em02
FBtr0074989	FBtr0074989_69	4.65976	1.34441e-05	-4.48204	0.000483859	em02
FBtr0074991	FBtr0074991_19	2.79882	0.00718331	-2.94613	0.0222282	em02
FBtr0075018	FBtr0075018_50	0.878203	0.341103	-1.09409	0.414479	em02
FBtr0075019	FBtr0075019_57	-1.02314	0.351346	-1.01446	0.556679	em02
FBtr0075022	FBtr0075022_51	5.53158	0.00217226	-5.17144	0.022055	em02
FBtr0075025	FBtr0075025_169	-3.06408	0.0191092	1.18948	0.654959	em02
FBtr0075033	FBtr0075033_5	-1.13604	0.781956	-1.62081	0.802358	em02
FBtr0075037	FBtr0075037_1	0.814578	0.142974	-0.389411	0.734521	em02
FBtr0075037	FBtr0075037_147	1.02457	0.0390671	-0.599406	0.493606	em02
FBtr0075037	FBtr0075037_150	1.5375	0.00180416	-1.11234	0.117143	em02
FBtr0075037	FBtr0075037_232	-0.740465	0.699446	1.16563	0.673845	em02
FBtr0075037	FBtr0075037_307	-0.897756	0.448225	1.32292	0.392438	em02
FBtr0075037	FBtr0075037_313	0.125056	0.957978	0.300112	0.939328	em02
FBtr0075037	FBtr0075037_319	-0.336813	0.942263	0.76198	0.92111	em02
FBtr0075037	FBtr0075037_331	-1.97836	0.0784562	2.40352	0.0865561	em02
FBtr0075039	FBtr0075039_168	4.92277	0.0151601	-2.61053	0.439246	em02
FBtr0075039	FBtr0075039_176	5.67762	0.0404993	-3.36538	0.457193	em02
FBtr0075039	FBtr0075039_492	2.88638	0.594708	-0.574148	0.971231	em02
FBtr0075039	FBtr0075039_611	5.50771	0.00257452	-3.19547	0.243596	em02
FBtr0075039	FBtr0075039_630	4.3077	8.02454e-06	-1.99547	0.178639	em02
FBtr0075049	FBtr0075049_248	0.668117	0.129754	-1.84858	5.8875e-05	em02
FBtr0075049	FBtr0075049_32	-0.860014	0.296614	-0.320453	0.871344	em02
FBtr0075049	FBtr0075049_417	-0.178438	0.880808	-1.00203	0.387222	em02
FBtr0075049	FBtr0075049_638	-0.601755	0.188092	-0.578713	0.419814	em02
FBtr0075049	FBtr0075049_662	-0.51288	0.315264	-0.667588	0.352912	em02
FBtr0075049	FBtr0075049_666	-0.525618	0.203417	-0.654849	0.262794	em02
FBtr0075049	FBtr0075049_737	1.14872	0.166703	-2.32919	0.0095334	em02
FBtr0075051	FBtr0075051_39	2.23441	0.195964	-1.49008	0.626376	em02
FBtr0075054	FBtr0075054_29	0.252955	0.968563	-0.0212863	0.998928	em02
FBtr0075056	FBtr0075056_39	0.549641	0.401131	-1.40522	0.045203	em02
FBtr0075056	FBtr0075056_70	0.826621	0.8444	-1.6822	0.781753	em02
FBtr0075056	FBtr0075056_8	0.434422	0.5006	-1.29	0.055029	em02
FBtr0075062	FBtr0075062_41	-3.61402	0.181209	1.05364	0.877535	em02
FBtr0075064	FBtr0075064_165	-1.24223	0.261211	1.15556	0.50263	em02
FBtr0075075	FBtr0075075_56	-0.41642	0.730372	-1.02627	0.494608	em02
FBtr0075075	FBtr0075075_59	-0.256065	0.851658	-1.18663	0.400595	em02
FBtr0075084	FBtr0075084_429	1.12915	0.540346	-0.829322	0.863431	em02
FBtr0075084	FBtr0075084_707	3.32891	0.520402	-3.02908	0.740181	em02
FBtr0075084	FBtr0075084_72	-4.1412	0.491815	4.44103	0.648268	em02
FBtr0075086	FBtr0075086_1134	-1.88604	0.792767	0.801941	0.962695	em02
FBtr0075086	FBtr0075086_1148	-1.96717	0.78219	0.883078	0.956669	em02
FBtr0075086	FBtr0075086_1196	-1.01965	0.899915	-0.0644439	0.998524	em02
FBtr0075086	FBtr0075086_733	-1.10018	0.890822	0.0160829	0.999582	em02
FBtr0075086	FBtr0075086_786	-2.41	0.721647	1.3259	0.925592	em02
FBtr0075088	FBtr0075088_16	2.12451	0.721661	-1.57114	0.89233	em02
FBtr0075122	FBtr0075122_60	0.645855	0.654552	-0.89707	0.679197	em02
FBtr0075123	FBtr0075123_152	2.00142	0.216289	-3.63908	0.0514543	em02
FBtr0075123	FBtr0075123_181	0.6288	0.796635	-2.26646	0.379482	em02
FBtr0075123	FBtr0075123_187	0.716372	0.79349	-2.35403	0.433601	em02
FBtr0075125	FBtr0075125_152	1.97939	0.237121	-0.716772	0.882302	em02
FBtr0075125	FBtr0075125_181	1.56024	0.443769	-0.297626	0.965873	em02
FBtr0075125	FBtr0075125_187	1.92281	0.418027	-0.660193	0.917661	em02
FBtr0075126	FBtr0075126_127	0.600859	0.898908	0.0737345	0.997641	em02
FBtr0075126	FBtr0075126_139	2.24086	0.212909	-1.56627	0.623316	em02
FBtr0075126	FBtr0075126_166	1.18582	0.670925	-0.511223	0.937532	em02
FBtr0075133	FBtr0075133_199	3.63869	0.0293608	-2.74986	0.26515	em02
FBtr0075133	FBtr0075133_315	1.85569	0.311788	-0.966855	0.802358	em02
FBtr0075136	FBtr0075136_173	0.266038	0.957952	-0.180619	0.989566	em02
FBtr0075136	FBtr0075136_28	1.02123	0.460056	-0.935808	0.695642	em02
FBtr0075140	FBtr0075140_139	0.110056	0.935415	-0.104234	0.974972	em02
FBtr0075140	FBtr0075140_153	0.0582459	0.963299	-0.0524237	0.987905	em02
FBtr0075142	FBtr0075142_158	-0.399084	0.972977	2.81388	0.870552	em02
FBtr0075144	FBtr0075144_13	4.2447	0.0192677	-2.45572	0.404774	em02
FBtr0075152	FBtr0075152_72	-4.14983	0.126257	4.49862	0.206695	em02
FBtr0075153	FBtr0075153_383	-1.16898	0.53174	-0.0540561	0.995233	em02
FBtr0075153	FBtr0075153_387	-0.258791	0.916528	-0.964242	0.769562	em02
FBtr0075153	FBtr0075153_566	0.378527	0.947071	-1.60156	0.839122	em02
FBtr0075153	FBtr0075153_889	-2.01576	0.0382161	0.792724	0.693204	em02
FBtr0075160	FBtr0075160_37	3.96873	5.80848e-06	-2.90778	0.0106739	em02
FBtr0075161	FBtr0075161_94	0.258577	0.903724	-0.0195449	0.998524	em02
FBtr0075173	FBtr0075173_481	2.8936	0.334455	1.44012	0.8206	em02
FBtr0075187	FBtr0075187_179	0.43094	0.913949	-0.66313	0.925592	em02
FBtr0075197	FBtr0075197_368	-0.299581	0.961891	-0.395925	0.978107	em02
FBtr0075208	FBtr0075208_44	-0.533907	0.566754	-0.00455215	0.998928	em02
FBtr0075215	FBtr0075215_98	0.763162	0.660602	-0.64747	0.844231	em02
FBtr0075220	FBtr0075220_56	1.63809	0.117193	-2.72546	0.0233987	em02
FBtr0075222	FBtr0075222_238	-0.904811	0.680409	0.72764	0.86217	em02
FBtr0075228	FBtr0075228_130	1.86846	0.00037266	-1.30159	0.0754509	em02
FBtr0075228	FBtr0075228_15	2.78599	3.01603e-09	-2.21912	9.62028e-05	em02
FBtr0075228	FBtr0075228_29	3.05783	5.68022e-07	-2.49096	0.000816454	em02
FBtr0075228	FBtr0075228_72	1.59579	0.0803994	-1.02892	0.497085	em02
FBtr0075229	FBtr0075229_29	3.40823	0.00170859	-3.60771	0.00584839	em02
FBtr0075229	FBtr0075229_64	4.14833	0.00776413	-4.34781	0.0235661	em02
FBtr0075232	FBtr0075232_127	0.278524	0.773813	0.428505	0.781793	em02
FBtr0075232	FBtr0075232_153	-0.417717	0.927456	1.12475	0.877795	em02
FBtr0075232	FBtr0075232_159	-0.348477	0.943247	1.05551	0.888487	em02
FBtr0075275	FBtr0075275_107	0.674097	0.426107	-0.526288	0.72634	em02
FBtr0075275	FBtr0075275_196	-0.2018	0.880091	0.34961	0.876605	em02
FBtr0075275	FBtr0075275_57	3.71632	0.0687747	-3.56851	0.19135	em02
FBtr0075279	FBtr0075279_145	-0.711812	0.302828	0.248464	0.883909	em02
FBtr0075279	FBtr0075279_164	-0.97286	0.0823589	0.509512	0.647392	em02
FBtr0075293	FBtr0075293_95	0.4384	0.639513	-1.07596	0.310183	em02
FBtr0075309	FBtr0075309_9	-0.399084	0.972977	-0.611332	0.982733	em02
FBtr0075311	FBtr0075311_193	1.07348	0.0204331	-1.18802	0.0476709	em02
FBtr0075326	FBtr0075326_45	-2.65401	0.416692	1.28724	0.852966	em02
FBtr0075326	FBtr0075326_80	-1.33909	0.792814	-0.0276816	0.998928	em02
FBtr0075330	FBtr0075330_67	1.55598	0.108216	-1.31699	0.366861	em02
FBtr0075332	FBtr0075332_109	-0.347848	0.580882	-0.803498	0.276375	em02
FBtr0075332	FBtr0075332_116	-1.1822	0.00421863	0.0308568	0.989566	em02
FBtr0075332	FBtr0075332_245	-0.0626375	0.95324	-1.08871	0.178152	em02
FBtr0075332	FBtr0075332_251	-0.0896392	0.928254	-1.06171	0.207116	em02
FBtr0075332	FBtr0075332_346	0.246236	0.815174	-1.39758	0.136012	em02
FBtr0075332	FBtr0075332_354	0.307273	0.780794	-1.45862	0.152167	em02
FBtr0075332	FBtr0075332_360	0.255405	0.851611	-1.40675	0.259221	em02
FBtr0075332	FBtr0075332_402	1.37226	0.0119991	-2.5236	2.4431e-05	em02
FBtr0075332	FBtr0075332_543	-0.162064	0.898048	-0.989281	0.411114	em02
FBtr0075332	FBtr0075332_611	-0.86601	0.199407	-0.285336	0.863785	em02
FBtr0075332	FBtr0075332_622	-0.936402	0.273488	-0.214943	0.925592	em02
FBtr0075332	FBtr0075332_640	-1.2328	0.184858	0.0814505	0.982992	em02
FBtr0075337	FBtr0075337_52	1.8739	0.243952	-2.55615	0.204534	em02
FBtr0075346	FBtr0075346_88	1.41307	0.142473	-1.63611	0.191824	em02
FBtr0075347	FBtr0075347_1	-1.39902	0.857178	2.38068	0.846342	em02
FBtr0075354	FBtr0075354_112	-2.68854	0.363677	0.882659	0.903729	em02
FBtr0075408	FBtr0075408_233	3.5077	0.190051	0.592388	0.93972	em02
FBtr0075412	FBtr0075412_255	1.6212	4.5047e-06	-0.599296	0.506364	em02
FBtr0075428	FBtr0075428_90	1.73013	0.468419	-1.57955	0.692135	em02
FBtr0075435	FBtr0075435_136	5.04338	0.190936	-3.81118	0.544266	em02
FBtr0075435	FBtr0075435_236	1.35575	0.613898	-0.123552	0.991462	em02
FBtr0075435	FBtr0075435_347	2.85079	0.596404	-1.61859	0.883909	em02
FBtr0075452	FBtr0075452_42	0.507792	0.943018	-1.00061	0.936762	em02
FBtr0075457	FBtr0075457_138	-1.17259	0.259813	0.775321	0.690503	em02
FBtr0075459	FBtr0075459_2	1.30135	0.849941	-3.8097	0.655224	em02
FBtr0075459	FBtr0075459_260	-4.25666	0.365075	1.7483	0.871344	em02
FBtr0075459	FBtr0075459_31	-5.78501	0.0470813	3.27665	0.515413	em02
FBtr0075459	FBtr0075459_38	-3.13599	0.295791	0.627627	0.940155	em02
FBtr0075459	FBtr0075459_97	-3.86848	0.22044	1.36012	0.852966	em02
FBtr0075497	FBtr0075497_28	-0.709279	0.185417	0.161947	0.915515	em02
FBtr0075497	FBtr0075497_37	-0.808693	0.127968	0.261362	0.846877	em02
FBtr0075499	FBtr0075499_206	2.46148	0.00804083	-1.28473	0.400455	em02
FBtr0075505	FBtr0075505_111	1.3837	0.0113444	-1.63516	0.0162848	em02
FBtr0075510	FBtr0075510_170	0.390667	0.744922	0.0425115	0.992029	em02
FBtr0075510	FBtr0075510_176	0.228506	0.872737	0.204673	0.940847	em02
FBtr0075512	FBtr0075512_27	1.21886	0.457899	0.0297199	0.997813	em02
FBtr0075512	FBtr0075512_39	0.770816	0.730509	0.477769	0.91815	em02
FBtr0075522	FBtr0075522_61	-0.0995408	0.98232	0.802887	0.908491	em02
FBtr0075536	FBtr0075536_14	5.6776	0.00454294	-4.9225	0.0617673	em02
FBtr0075547	FBtr0075547_30	-0.448008	0.808135	0.545253	0.868431	em02
FBtr0075547	FBtr0075547_39	-0.998554	0.615648	1.0958	0.734743	em02
FBtr0075547	FBtr0075547_8	-1.98406	0.664556	2.08131	0.789978	em02
FBtr0075547	FBtr0075547_91	-0.52465	0.91805	0.621896	0.948095	em02
FBtr0075562	FBtr0075562_135	-0.208503	0.894852	-0.715156	0.717517	em02
FBtr0075562	FBtr0075562_153	-0.11003	0.948387	-0.813629	0.672278	em02
FBtr0075562	FBtr0075562_198	-6.68025	0.0374577	5.75659	0.189801	em02
FBtr0075579	FBtr0075579_98	3.07891	0.0403269	0.0450489	0.996828	em02
FBtr0075604	FBtr0075604_12	-0.854747	0.776706	2.43011	0.489762	em02
FBtr0075604	FBtr0075604_211	5.17127	0.0108786	-3.59591	0.229491	em02
FBtr0075604	FBtr0075604_23	1.3923	0.3476	0.183057	0.972839	em02
FBtr0075604	FBtr0075604_258	0.734771	0.871113	0.840591	0.918316	em02
FBtr0075604	FBtr0075604_266	2.98695	0.324118	-1.41159	0.827437	em02
FBtr0075607	FBtr0075607_398	5.17067	0.00825667	-2.92098	0.341453	em02
FBtr0075607	FBtr0075607_53	6.14304	0.00838697	-3.89336	0.259149	em02
FBtr0075626	FBtr0075626_159	-0.183595	0.862946	0.568678	0.678037	em02
FBtr0075626	FBtr0075626_171	-0.41099	0.66095	0.796074	0.516375	em02
FBtr0075626	FBtr0075626_219	0.213878	0.948746	0.171205	0.982992	em02
FBtr0075626	FBtr0075626_291	-1.23609	0.215272	1.62117	0.20384	em02
FBtr0075626	FBtr0075626_30	4.12151	0.123475	-3.73643	0.32303	em02
FBtr0075626	FBtr0075626_72	1.93989	0.0838475	-1.55481	0.349794	em02
FBtr0075641	FBtr0075641_168	0.18584	0.985003	2.59946	0.878386	em02
FBtr0075645	FBtr0075645_74	-3.94121	0.144917	3.72116	0.328614	em02
FBtr0075651	FBtr0075651_116	-0.147558	0.964405	0.161035	0.982992	em02
FBtr0075651	FBtr0075651_212	0.159814	0.849069	-0.146337	0.933457	em02
FBtr0075651	FBtr0075651_232	-1.5246	0.591971	1.53807	0.742194	em02
FBtr0075651	FBtr0075651_261	-1.27355	0.540947	1.28702	0.699673	em02
FBtr0075651	FBtr0075651_359	0.0882849	0.939569	-0.0748078	0.979104	em02
FBtr0075651	FBtr0075651_61	-0.150649	0.923617	0.164126	0.958899	em02
FBtr0075657	FBtr0075657_149	-0.04585	0.974711	-1.02617	0.456723	em02
FBtr0075657	FBtr0075657_17	0.145217	0.965857	-1.21724	0.757609	em02
FBtr0075657	FBtr0075657_219	0.352455	0.730509	-1.42447	0.1809	em02
FBtr0075657	FBtr0075657_274	-1.44091	0.0425533	0.368894	0.846877	em02
FBtr0075679	FBtr0075679_125	-0.637339	0.529385	0.243692	0.921914	em02
FBtr0075679	FBtr0075679_191	-0.21343	0.799098	-0.180216	0.919415	em02
FBtr0075679	FBtr0075679_222	0.810883	0.289683	-1.20453	0.235832	em02
FBtr0075691	FBtr0075691_49	-0.0771744	0.988787	-0.00156962	0.9998	em02
FBtr0075693	FBtr0075693_147	-7.46218	0.00273136	7.15024	0.0211479	em02
FBtr0075693	FBtr0075693_173	-3.45462	0.585771	3.14268	0.772512	em02
FBtr0075693	FBtr0075693_53	0.105185	0.933751	-0.417125	0.8268	em02
FBtr0075693	FBtr0075693_87	0.67264	0.640628	-0.98458	0.649612	em02
FBtr0075715	FBtr0075715_53	1.18584	0.581126	-1.74466	0.559982	em02
FBtr0075724	FBtr0075724_281	2.59299	3.55826e-05	-2.55281	0.000740767	em02
FBtr0075724	FBtr0075724_289	2.88391	0.0565365	-2.84372	0.156452	em02
FBtr0075756	FBtr0075756_99	0.450419	0.637534	-1.1722	0.278537	em02
FBtr0075759	FBtr0075759_83	0.427719	0.730509	-1.1254	0.44737	em02
FBtr0075768	FBtr0075768_129	1.37348	0.172298	-1.69529	0.199783	em02
FBtr0075768	FBtr0075768_154	-0.121571	0.948387	-0.200242	0.954555	em02
FBtr0075768	FBtr0075768_418	1.74194	0.105901	-2.06375	0.140983	em02
FBtr0075769	FBtr0075769_353	-0.292171	0.90713	0.19613	0.975087	em02
FBtr0075769	FBtr0075769_396	0.408253	0.942467	-0.504293	0.965194	em02
FBtr0075769	FBtr0075769_516	-0.136061	0.967237	0.0400201	0.997813	em02
FBtr0075769	FBtr0075769_98	-0.0510306	0.979793	-0.0450103	0.994418	em02
FBtr0075774	FBtr0075774_118	0.700468	0.894752	-2.96528	0.616596	em02
FBtr0075775	FBtr0075775_121	-0.895796	0.347324	0.438913	0.836009	em02
FBtr0075775	FBtr0075775_670	-2.4937	0.150279	2.03682	0.446694	em02
FBtr0075777	FBtr0075777_25	0.770776	0.826249	0.864629	0.889261	em02
FBtr0075778	FBtr0075778_251	3.08625	0.230106	0.66089	0.925592	em02
FBtr0075778	FBtr0075778_302	2.40817	0.49381	1.33897	0.854773	em02
FBtr0075781	FBtr0075781_118	-0.333576	0.840128	-0.575262	0.826828	em02
FBtr0075781	FBtr0075781_19	-0.984057	0.611559	0.0752189	0.991982	em02
FBtr0075781	FBtr0075781_26	-0.737727	0.540768	-0.171112	0.959405	em02
FBtr0075784	FBtr0075784_177	2.54599	0.498692	-2.74176	0.63939	em02
FBtr0075784	FBtr0075784_183	0.800201	0.760994	-0.995964	0.818296	em02
FBtr0075784	FBtr0075784_55	-0.366675	0.863914	0.170913	0.975087	em02
FBtr0075784	FBtr0075784_87	0.256944	0.833766	-0.452706	0.813504	em02
FBtr0075812	FBtr0075812_223	-1.74527	0.0121135	0.35601	0.846342	em02
FBtr0075812	FBtr0075812_366	-0.498084	0.461177	-0.891175	0.298128	em02
FBtr0075812	FBtr0075812_406	-0.889686	0.405654	-0.499573	0.819886	em02
FBtr0075812	FBtr0075812_528	-0.644513	0.33608	-0.744746	0.455173	em02
FBtr0075812	FBtr0075812_534	-0.695816	0.308472	-0.693444	0.522688	em02
FBtr0075812	FBtr0075812_578	-1.12692	0.202819	-0.262339	0.910526	em02
FBtr0075813	FBtr0075813_151	-2.57714	1.98783e-05	2.15463	0.00728441	em02
FBtr0075813	FBtr0075813_184	-2.31663	0.000131188	1.89412	0.0229875	em02
FBtr0075897	FBtr0075897_27	-3.18959	0.313618	3.17528	0.501213	em02
FBtr0075898	FBtr0075898_105	-0.689542	0.265971	0.918043	0.307684	em02
FBtr0075898	FBtr0075898_51	-0.413597	0.843581	0.642099	0.850431	em02
FBtr0075913	FBtr0075913_171	-0.0795521	0.958384	0.257713	0.921935	em02
FBtr0075929	FBtr0075929_127	-1.39638	0.313227	0.719936	0.80192	em02
FBtr0075942	FBtr0075942_241	6.29133	0.117525	-6.96847	0.181906	em02
FBtr0075942	FBtr0075942_247	6.29133	0.117525	-6.96847	0.181906	em02
FBtr0075948	FBtr0075948_100	-0.289281	0.760994	0.599173	0.676177	em02
FBtr0075948	FBtr0075948_130	-0.128398	0.920435	0.43829	0.822175	em02
FBtr0075948	FBtr0075948_172	0.588919	0.777024	-0.279027	0.953849	em02
FBtr0075948	FBtr0075948_195	0.419727	0.740973	-0.109835	0.978107	em02
FBtr0075948	FBtr0075948_217	0.484454	0.739257	-0.174562	0.9636	em02
FBtr0075948	FBtr0075948_44	-0.901177	0.226972	1.21107	0.249196	em02
FBtr0075957	FBtr0075957_98	0.564359	0.780324	-1.48242	0.553399	em02
FBtr0075961	FBtr0075961_59	-0.229194	0.973303	-1.08058	0.92387	em02
FBtr0075968	FBtr0075968_57	0.990557	0.235461	-0.969792	0.448254	em02
FBtr0075981	FBtr0075981_139	0.059394	0.957921	-0.403031	0.767785	em02
FBtr0075982	FBtr0075982_176	-1.8598	0.00161986	0.27205	0.876708	em02
FBtr0075997	FBtr0075997_100	-1.39909	0.24425	0.840447	0.711732	em02
FBtr0075998	FBtr0075998_287	3.75869	0.0601838	-2.80957	0.344895	em02
FBtr0076006	FBtr0076006_47	2.48894	0.125277	-1.81421	0.493606	em02
FBtr0076049	FBtr0076049_93	0.922873	0.856446	-1.04161	0.909123	em02
FBtr0076061	FBtr0076061_35	0.278932	0.959628	-1.21427	0.878386	em02
FBtr0076061	FBtr0076061_46	0.863883	0.860261	-1.79922	0.802358	em02
FBtr0076075	FBtr0076075_207	0.475111	0.00202461	-0.816442	0.240542	em02
FBtr0076075	FBtr0076075_261	0.409886	0.0128488	-0.751217	0.300211	em02
FBtr0076075	FBtr0076075_284	0.107268	0.575586	-0.448599	0.628862	em02
FBtr0076075	FBtr0076075_292	-0.273882	0.0665318	-0.0674481	0.971231	em02
FBtr0076075	FBtr0076075_315	-0.320833	0.141969	-0.0204972	0.994402	em02
FBtr0076077	FBtr0076077_48	-0.506779	0.513601	-0.432837	0.75886	em02
FBtr0076077	FBtr0076077_88	-1.42839	0.165907	0.488776	0.84075	em02
FBtr0076077	FBtr0076077_9	-0.559788	0.450273	-0.379828	0.799044	em02
FBtr0076093	FBtr0076093_396	-1.4359	0.0466194	0.610717	0.673983	em02
FBtr0076093	FBtr0076093_478	0.653364	0.473982	-1.47855	0.14612	em02
FBtr0076093	FBtr0076093_604	1.89133	0.0954728	-2.71651	0.0421832	em02
FBtr0076093	FBtr0076093_619	2.27896	0.0237637	-3.10414	0.0077693	em02
FBtr0076107	FBtr0076107_39	3.07827	0.00747663	-3.14918	0.0323236	em02
FBtr0076108	FBtr0076108_107	1.02389	0.0546566	-0.689871	0.436412	em02
FBtr0076108	FBtr0076108_89	0.780409	0.123475	-0.44639	0.649612	em02
FBtr0076114	FBtr0076114_66	-0.814159	0.726768	-1.33327	0.695642	em02
FBtr0076134	FBtr0076134_24	-0.0929796	0.972977	-0.887351	0.801165	em02
FBtr0076134	FBtr0076134_4	0.133261	0.961726	-1.11359	0.707874	em02
FBtr0076146	FBtr0076146_152	1.99395	0.095359	-2.22293	0.153846	em02
FBtr0076146	FBtr0076146_158	1.92457	0.0115718	-2.15354	0.0235711	em02
FBtr0076146	FBtr0076146_315	-0.833857	0.580882	0.604882	0.83591	em02
FBtr0076146	FBtr0076146_362	1.50233	0.154538	-1.7313	0.212398	em02
FBtr0076146	FBtr0076146_375	1.88217	0.0739603	-2.11115	0.120439	em02
FBtr0076161	FBtr0076161_180	-1.51975	0.810833	1.65721	0.882778	em02
FBtr0076161	FBtr0076161_186	-1.51975	0.810833	1.65721	0.882778	em02
FBtr0076165	FBtr0076165_103	-2.88238	0.294112	3.4804	0.349941	em02
FBtr0076165	FBtr0076165_108	-3.86444	0.113641	4.46246	0.159654	em02
FBtr0076168	FBtr0076168_177	1.03076	0.030134	-1.45549	0.0376263	em02
FBtr0076168	FBtr0076168_235	-0.482436	0.269724	0.0577036	0.978195	em02
FBtr0076168	FBtr0076168_365	-0.126286	0.872892	-0.298446	0.83642	em02
FBtr0076168	FBtr0076168_72	-0.377412	0.648731	-0.047321	0.989566	em02
FBtr0076181	FBtr0076181_6	1.68095	0.607978	-2.9339	0.506517	em02
FBtr0076186	FBtr0076186_39	0.929079	0.514897	-1.14518	0.589294	em02
FBtr0076189	FBtr0076189_1	0.135231	0.961805	-1.17353	0.699673	em02
FBtr0076189	FBtr0076189_384	-0.950729	0.0932459	-0.0875717	0.970943	em02
FBtr0076189	FBtr0076189_420	-1.36528	0.0288987	0.32698	0.85159	em02
FBtr0076189	FBtr0076189_454	-2.86474	0.00358979	1.82644	0.222434	em02
FBtr0076189	FBtr0076189_471	-0.890101	0.625924	-0.148199	0.980159	em02
FBtr0076189	FBtr0076189_621	-0.0110297	0.991867	-1.02727	0.298206	em02
FBtr0076189	FBtr0076189_626	-0.585515	0.860594	-0.452785	0.946455	em02
FBtr0076189	FBtr0076189_713	-1.72198	0.00558578	0.683681	0.611925	em02
FBtr0076203	FBtr0076203_19	0.0603859	0.989781	-0.0653609	0.997641	em02
FBtr0076203	FBtr0076203_95	1.04146	0.397488	-1.04644	0.589061	em02
FBtr0076205	FBtr0076205_131	-0.0205896	0.997827	-2.60913	0.731174	em02
FBtr0076205	FBtr0076205_19	1.82339	0.730509	-4.45312	0.493038	em02
FBtr0076208	FBtr0076208_101	-2.51975	0.677288	-0.033992	0.998928	em02
FBtr0076208	FBtr0076208_71	1.60092	0.806322	-4.15467	0.604495	em02
FBtr0076208	FBtr0076208_81	1.50781	0.819628	-4.06155	0.618023	em02
FBtr0076208	FBtr0076208_96	-3.84161	0.433118	1.28786	0.911012	em02
FBtr0076210	FBtr0076210_70	0.0420816	0.98072	-1.19214	0.463833	em02
FBtr0076210	FBtr0076210_73	0.0945964	0.959565	-1.24466	0.461603	em02
FBtr0076236	FBtr0076236_247	0.0369228	0.965857	0.0341583	0.989915	em02
FBtr0076236	FBtr0076236_262	0.132374	0.864393	-0.0612925	0.978107	em02
FBtr0076236	FBtr0076236_287	-0.250079	0.833726	0.32116	0.882332	em02
FBtr0076236	FBtr0076236_547	-0.471611	0.693219	0.542692	0.791403	em02
FBtr0076236	FBtr0076236_632	1.34632	0.156739	-1.27524	0.364967	em02
FBtr0076236	FBtr0076236_691	1.21887	0.128191	-1.14779	0.335079	em02
FBtr0076236	FBtr0076236_930	1.90353	5.7157e-05	-1.83245	0.00341342	em02
FBtr0076241	FBtr0076241_44	2.45855	0.477681	-1.63819	0.806538	em02
FBtr0076242	FBtr0076242_39	-0.197437	0.970689	-2.51882	0.650322	em02
FBtr0076255	FBtr0076255_59	0.759723	0.328944	-0.747414	0.626376	em02
FBtr0076269	FBtr0076269_7	0.53308	0.77451	-2.71719	0.107129	em02
FBtr0076277	FBtr0076277_154	0.738642	0.510753	-0.45448	0.84155	em02
FBtr0076319	FBtr0076319_537	1.08332	0.033455	-0.485914	0.701901	em02
FBtr0076319	FBtr0076319_702	-0.486016	0.365476	1.08343	0.176664	em02
FBtr0076319	FBtr0076319_868	-0.798308	0.126815	1.39572	0.0707396	em02
FBtr0076319	FBtr0076319_931	-1.21019	0.0501257	1.8076	0.0353752	em02
FBtr0076343	FBtr0076343_307	-0.340685	0.890822	0.191788	0.975087	em02
FBtr0076354	FBtr0076354_54	1.73308	0.248845	-1.65597	0.462443	em02
FBtr0076372	FBtr0076372_107	2.45131	0.0679559	-0.564916	0.877922	em02
FBtr0076372	FBtr0076372_24	2.41095	0.00646417	-0.524558	0.826746	em02
FBtr0076382	FBtr0076382_63	1.77077	0.675807	1.50572	0.846342	em02
FBtr0076383	FBtr0076383_61	1.5451	0.279099	-1.28662	0.589515	em02
FBtr0076392	FBtr0076392_146	0.47536	0.771718	-0.0850287	0.988496	em02
FBtr0076392	FBtr0076392_188	3.36539	0.171255	-2.97506	0.417954	em02
FBtr0076403	FBtr0076403_60	2.71743	0.0530548	-3.17927	0.0679875	em02
FBtr0076403	FBtr0076403_96	1.65977	0.341861	-2.12162	0.361349	em02
FBtr0076413	FBtr0076413_83	0.378882	0.71596	-1.05163	0.366861	em02
FBtr0076429	FBtr0076429_103	-2.68405	0.0658569	-0.127825	0.983722	em02
FBtr0076429	FBtr0076429_109	-4.89024	0.0121135	2.07837	0.570916	em02
FBtr0076429	FBtr0076429_268	-4.04318	1.11752e-07	1.23131	0.379865	em02
FBtr0076461	FBtr0076461_12	0.306464	0.963165	0.0626569	0.998036	em02
FBtr0076468	FBtr0076468_102	0.670059	0.319053	-0.614621	0.612137	em02
FBtr0076468	FBtr0076468_197	1.01062	0.0474078	-0.955181	0.229397	em02
FBtr0076468	FBtr0076468_301	2.06386	0.00395448	-2.00842	0.0355633	em02
FBtr0076468	FBtr0076468_317	1.69399	0.32686	-1.63855	0.543386	em02
FBtr0076468	FBtr0076468_361	2.3044	0.0266071	-2.24896	0.107211	em02
FBtr0076468	FBtr0076468_45	1.15833	0.0153866	-1.1029	0.130191	em02
FBtr0076468	FBtr0076468_72	0.950332	0.0672711	-0.894894	0.27473	em02
FBtr0076475	FBtr0076475_131	0.544298	0.81136	-0.856299	0.812599	em02
FBtr0076475	FBtr0076475_79	2.30513	0.125526	-2.61713	0.18536	em02
FBtr0076486	FBtr0076486_102	1.36641	0.292664	-1.57935	0.377484	em02
FBtr0076486	FBtr0076486_181	0.373899	0.806322	-0.586839	0.804626	em02
FBtr0076486	FBtr0076486_191	-3.09172	0.293023	2.87878	0.521119	em02
FBtr0076486	FBtr0076486_249	1.7078	0.342588	-1.92074	0.452607	em02
FBtr0076486	FBtr0076486_289	-0.877854	0.60253	0.664913	0.836009	em02
FBtr0076486	FBtr0076486_297	-0.136068	0.979469	-0.0768726	0.997641	em02
FBtr0076486	FBtr0076486_318	0.528746	0.654862	-0.741686	0.678407	em02
FBtr0076486	FBtr0076486_333	0.57052	0.655343	-0.78346	0.686218	em02
FBtr0076486	FBtr0076486_476	-0.749598	0.587541	0.536658	0.84155	em02
FBtr0076486	FBtr0076486_54	1.99583	0.0404391	-2.20877	0.0735986	em02
FBtr0076486	FBtr0076486_549	-0.0816086	0.967775	-0.131331	0.978107	em02
FBtr0076486	FBtr0076486_671	-2.68793	0.323749	2.47499	0.562016	em02
FBtr0076486	FBtr0076486_702	1.65674	0.378309	-1.86968	0.492429	em02
FBtr0076494	FBtr0076494_300	0.600896	0.53453	-1.1448	0.342865	em02
FBtr0076494	FBtr0076494_430	-1.09097	0.416693	0.547064	0.849549	em02
FBtr0076494	FBtr0076494_575	1.66247	0.00812145	-2.20638	0.00369779	em02
FBtr0076494	FBtr0076494_97	0.528805	0.678021	-1.07271	0.514768	em02
FBtr0076498	FBtr0076498_2	5.04335	0.29859	-3.96755	0.625982	em02
FBtr0076499	FBtr0076499_51	0.762291	0.193012	-1.14167	0.122999	em02
FBtr0076503	FBtr0076503_206	4.38741	0.0504538	0.142751	0.991147	em02
FBtr0076504	FBtr0076504_3	-0.103646	0.97815	0.0514923	0.997641	em02
FBtr0076515	FBtr0076515_328	-0.46183	0.781956	-1.85551	0.253398	em02
FBtr0076515	FBtr0076515_80	-1.77552	0.0291803	-0.541818	0.772512	em02
FBtr0076520	FBtr0076520_97	-1.22784	0.119222	-0.891419	0.493023	em02
FBtr0076524	FBtr0076524_10	-3.42661	0.614161	3.47916	0.756027	em02
FBtr0076524	FBtr0076524_33	1.73011	0.664183	-1.67756	0.812177	em02
FBtr0076537	FBtr0076537_62	0.802579	0.884621	1.20251	0.897396	em02
FBtr0076547	FBtr0076547_14	-0.00676393	0.999141	2.72268	0.748286	em02
FBtr0076547	FBtr0076547_141	0.448882	0.904552	2.26703	0.595188	em02
FBtr0076570	FBtr0076570_72	1.60079	0.853001	-2.18093	0.88243	em02
FBtr0076583	FBtr0076583_273	2.68831	0.378755	1.14891	0.871344	em02
FBtr0076583	FBtr0076583_278	4.06019	0.2651	-0.222972	0.989566	em02
FBtr0076598	FBtr0076598_30	2.09686	0.217099	-2.4589	0.271424	em02
FBtr0076602	FBtr0076602_67	-1.25366	0.310599	1.59492	0.338674	em02
FBtr0076620	FBtr0076620_21	0.54844	0.901753	0.0550265	0.997813	em02
FBtr0076620	FBtr0076620_8	1.54841	0.624937	-0.944946	0.883792	em02
FBtr0076621	FBtr0076621_255	0.408216	0.962911	1.0429	0.945845	em02
FBtr0076621	FBtr0076621_99	-0.216898	0.966551	1.66801	0.822979	em02
FBtr0076624	FBtr0076624_102	-0.129399	0.933751	0.122835	0.975087	em02
FBtr0076624	FBtr0076624_118	0.98966	0.244354	-0.996223	0.465154	em02
FBtr0076624	FBtr0076624_138	0.666781	0.624118	-0.673345	0.781955	em02
FBtr0076624	FBtr0076624_233	2.23112	0.018747	-2.23769	0.0826819	em02
FBtr0076624	FBtr0076624_433	0.980001	0.418645	-0.986565	0.625185	em02
FBtr0076624	FBtr0076624_516	-0.670405	0.586832	0.663842	0.760126	em02
FBtr0076688	FBtr0076688_28	-1.15808	0.58188	0.977023	0.794847	em02
FBtr0076690	FBtr0076690_52	-0.916705	0.304426	0.128698	0.965194	em02
FBtr0076690	FBtr0076690_57	-1.31713	0.0433857	0.529123	0.699673	em02
FBtr0076710	FBtr0076710_82	-1.75901	0.000476569	0.845591	0.352041	em02
FBtr0076729	FBtr0076729_78	-2.32869	0.101466	1.89282	0.370441	em02
FBtr0076737	FBtr0076737_7	-0.484018	0.887065	1.30226	0.780623	em02
FBtr0076745	FBtr0076745_38	0.60085	0.940345	-1.88831	0.877795	em02
FBtr0076756	FBtr0076756_310	0.722032	0.310565	1.13461	0.435089	em02
FBtr0076756	FBtr0076756_412	1.09736	0.0311212	0.759288	0.628835	em02
FBtr0076756	FBtr0076756_427	0.360546	0.215666	1.4961	0.0975847	em02
FBtr0076768	FBtr0076768_135	-1.35331	0.813018	-1.78526	0.875254	em02
FBtr0076768	FBtr0076768_80	0.91317	0.913905	-4.05174	0.71625	em02
FBtr0076770	FBtr0076770_57	4.7006	0.0416616	-6.46933	0.0165021	em02
FBtr0076772	FBtr0076772_222	6.08965	0.000655616	-6.29532	0.00293542	em02
FBtr0076772	FBtr0076772_313	-0.177276	0.817563	-0.0283983	0.99179	em02
FBtr0076772	FBtr0076772_319	-0.168285	0.830992	-0.0373893	0.989915	em02
FBtr0076772	FBtr0076772_322	-0.0136041	0.987773	-0.19207	0.905987	em02
FBtr0076772	FBtr0076772_333	0.907278	0.0187332	-1.11295	0.0511178	em02
FBtr0076772	FBtr0076772_337	0.345059	0.6809	-0.550734	0.677051	em02
FBtr0076772	FBtr0076772_357	0.382674	0.58823	-0.588349	0.595188	em02
FBtr0076772	FBtr0076772_451	0.709757	0.417994	-0.915431	0.480095	em02
FBtr0076805	FBtr0076805_219	-1.55106	0.783655	0.964818	0.936762	em02
FBtr0076814	FBtr0076814_48	2.1213	0.134752	-1.29714	0.606372	em02
FBtr0076814	FBtr0076814_57	2.71237	0.125987	-1.88821	0.513736	em02
FBtr0076821	FBtr0076821_172	-4.32193	0.037519	3.01454	0.342272	em02
FBtr0076821	FBtr0076821_261	0.100002	0.9494	-1.4074	0.309679	em02
FBtr0076821	FBtr0076821_352	3.79841	0.0864502	-5.10581	0.0561625	em02
FBtr0076821	FBtr0076821_363	-0.133754	0.969753	-1.17364	0.786818	em02
FBtr0076821	FBtr0076821_59	-0.832386	0.668628	-0.475009	0.909123	em02
FBtr0076821	FBtr0076821_94	2.00483	0.196403	-3.31223	0.0715502	em02
FBtr0076835	FBtr0076835_135	-1.67174	0.824452	2.32507	0.849549	em02
FBtr0076848	FBtr0076848_225	-0.30288	0.899915	0.271034	0.955244	em02
FBtr0076848	FBtr0076848_237	0.190083	0.728578	-0.221929	0.85607	em02
FBtr0076851	FBtr0076851_77	0.43538	0.642143	-0.652927	0.663933	em02
FBtr0076867	FBtr0076867_498	1.51843	0.217119	-1.094	0.611954	em02
FBtr0076867	FBtr0076867_81	3.09271	0.0492447	-2.66828	0.222691	em02
FBtr0076870	FBtr0076870_128	1.05156	0.50299	-2.00177	0.281275	em02
FBtr0076870	FBtr0076870_39	-1.39241	0.221007	0.442197	0.877535	em02
FBtr0076870	FBtr0076870_91	-1.30352	0.0639807	0.353307	0.845752	em02
FBtr0076878	FBtr0076878_1	-4.04816	0.128936	3.73719	0.318885	em02
FBtr0076878	FBtr0076878_30	0.740556	0.298447	-1.05153	0.262574	em02
FBtr0076878	FBtr0076878_45	1.02824	0.160267	-1.33921	0.160228	em02
FBtr0076878	FBtr0076878_8	0.408839	0.647912	-0.719809	0.56724	em02
FBtr0076882	FBtr0076882_112	0.957492	0.789343	-2.60848	0.537376	em02
FBtr0076882	FBtr0076882_239	-0.446403	0.76693	-1.20459	0.503885	em02
FBtr0076882	FBtr0076882_98	-5.25672	0.190908	3.60573	0.600789	em02
FBtr0076884	FBtr0076884_29	0.507781	0.85845	-1.34438	0.717058	em02
FBtr0076890	FBtr0076890_124	0.140402	0.890865	-0.301394	0.849549	em02
FBtr0076890	FBtr0076890_545	1.19328	0.214392	-1.35427	0.298311	em02
FBtr0076890	FBtr0076890_83	-0.428012	0.586293	0.26702	0.874481	em02
FBtr0076890	FBtr0076890_88	-0.362256	0.548126	0.201264	0.882302	em02
FBtr0076890	FBtr0076890_99	-0.706529	0.370886	0.545537	0.697713	em02
FBtr0076896	FBtr0076896_23	0.176927	0.927625	-0.766962	0.769502	em02
FBtr0076897	FBtr0076897_39	-0.176718	0.977249	-0.619593	0.956684	em02
FBtr0076934	FBtr0076934_135	1.85072	6.69246e-08	-2.093	1.8535e-05	em02
FBtr0076934	FBtr0076934_228	1.16632	0.0836071	-1.40859	0.133298	em02
FBtr0076943	FBtr0076943_101	2.92278	0.58551	-3.11296	0.714319	em02
FBtr0076949	FBtr0076949_28	2.11185	0.108026	-1.99911	0.268492	em02
FBtr0076950	FBtr0076950_138	0.868372	0.564688	-1.67635	0.356187	em02
FBtr0076950	FBtr0076950_153	0.932097	0.543521	-1.74007	0.349941	em02
FBtr0076950	FBtr0076950_251	2.6232	0.376571	-3.43118	0.383896	em02
FBtr0076950	FBtr0076950_341	0.185839	0.982454	-0.993815	0.946517	em02
FBtr0076950	FBtr0076950_358	6.36526	0.0403807	-7.17324	0.062122	em02
FBtr0076950	FBtr0076950_414	3.34426	0.00478983	-4.15223	0.00255604	em02
FBtr0076950	FBtr0076950_426	3.22744	0.00706028	-4.03542	0.00383852	em02
FBtr0076950	FBtr0076950_524	0.811765	0.512574	-1.61974	0.26361	em02
FBtr0076968	FBtr0076968_1033	0.693543	0.648792	-0.0995812	0.983845	em02
FBtr0076968	FBtr0076968_1082	-0.721004	0.85845	1.31497	0.832814	em02
FBtr0076968	FBtr0076968_1103	0.363857	0.827542	0.230105	0.946837	em02
FBtr0076968	FBtr0076968_112	-0.510133	0.838362	1.1041	0.751189	em02
FBtr0076968	FBtr0076968_230	-0.362237	0.814721	0.956199	0.623316	em02
FBtr0076968	FBtr0076968_252	-0.356424	0.824748	0.950386	0.640213	em02
FBtr0076968	FBtr0076968_423	0.263857	0.928775	0.330105	0.954935	em02
FBtr0076968	FBtr0076968_472	2.42528	0.290145	-1.83132	0.639377	em02
FBtr0076968	FBtr0076968_486	2.77077	0.380819	-2.17681	0.68963	em02
FBtr0076968	FBtr0076968_507	-0.223527	0.928254	0.817489	0.816952	em02
FBtr0076968	FBtr0076968_61	1.8963	0.522019	-1.30233	0.818296	em02
FBtr0076968	FBtr0076968_871	1.95572	0.245569	-1.36176	0.644812	em02
FBtr0076968	FBtr0076968_921	-0.213114	0.859552	0.807077	0.566064	em02
FBtr0076968	FBtr0076968_931	-0.136067	0.92654	0.730029	0.678407	em02
FBtr0076968	FBtr0076968_981	-0.653672	0.578295	1.24763	0.38986	em02
FBtr0076968	FBtr0076968_994	-0.0197233	0.994085	0.613685	0.876605	em02
FBtr0076983	FBtr0076983_26	0.306158	0.92421	-2.41943	0.426541	em02
FBtr0076999	FBtr0076999_61	1.60079	0.853001	-2.67597	0.846324	em02
FBtr0077007	FBtr0077007_161	1.40815	0.874591	1.73877	0.912537	em02
FBtr0077007	FBtr0077007_171	-0.0343778	0.99768	3.1813	0.789978	em02
FBtr0077007	FBtr0077007_365	2.77076	0.5245	0.376165	0.980261	em02
FBtr0077007	FBtr0077007_764	2.04349	0.757681	1.10343	0.939328	em02
FBtr0077007	FBtr0077007_839	5.13091	0.159289	-1.98399	0.814648	em02
FBtr0077007	FBtr0077007_957	3.76811	0.024494	-0.621192	0.911321	em02
FBtr0077017	FBtr0077017_12	0.54477	0.643174	-1.47382	0.243049	em02
FBtr0077043	FBtr0077043_267	1.61604	0.0146611	-1.75884	0.0521077	em02
FBtr0077043	FBtr0077043_287	2.56783	0.00624571	-2.71064	0.0246816	em02
FBtr0077049	FBtr0077049_126	-1.39902	0.904552	1.11541	0.966724	em02
FBtr0077049	FBtr0077049_130	1.04356	0.924475	-1.32716	0.95211	em02
FBtr0077063	FBtr0077063_189	1.16382	0.433541	-0.56063	0.865737	em02
FBtr0077064	FBtr0077064_116	-1.66216	0.776968	-0.0462805	0.998928	em02
FBtr0077064	FBtr0077064_163	-0.662103	0.928775	-1.04634	0.949996	em02
FBtr0077064	FBtr0077064_53	1.84887	0.765773	-3.55731	0.740814	em02
FBtr0077065	FBtr0077065_74	1.60868	0.48467	-0.694276	0.895831	em02
FBtr0077074	FBtr0077074_166	0.88102	0.826283	-1.03656	0.882778	em02
FBtr0077082	FBtr0077082_1637	-1.02048	0.797617	2.95302	0.53384	em02
FBtr0077082	FBtr0077082_1731	2.6306	0.227822	-0.698061	0.903999	em02
FBtr0077082	FBtr0077082_1832	1.31138	0.66438	0.621166	0.929695	em02
FBtr0077082	FBtr0077082_848	-3.8416	0.63114	5.77414	0.612777	em02
FBtr0077082	FBtr0077082_905	1.04356	0.924475	0.888985	0.971559	em02
FBtr0077085	FBtr0077085_101	-1.67172	0.821368	2.29904	0.849654	em02
FBtr0077085	FBtr0077085_73	-0.174478	0.94128	0.801795	0.812599	em02
FBtr0077090	FBtr0077090_166	3.8582	0.137079	-0.273408	0.979178	em02
FBtr0077095	FBtr0077095_83	1.04641	0.0674873	-1.12153	0.185087	em02
FBtr0077100	FBtr0077100_125	0.665275	0.373345	-1.26966	0.160964	em02
FBtr0077100	FBtr0077100_210	0.0360335	0.972977	-0.640419	0.553399	em02
FBtr0077100	FBtr0077100_271	-0.326587	0.586677	-0.277799	0.819886	em02
FBtr0077100	FBtr0077100_498	-0.132963	0.932825	-0.471422	0.84155	em02
FBtr0077112	FBtr0077112_73	-0.0258263	0.985003	-0.205382	0.931521	em02
FBtr0077116	FBtr0077116_103	-0.504862	0.524931	-0.0940897	0.971219	em02
FBtr0077116	FBtr0077116_58	-0.842333	0.244634	0.243381	0.899835	em02
FBtr0077118	FBtr0077118_5	1.92274	0.814931	-1.9503	0.89639	em02
FBtr0077123	FBtr0077123_28	-0.458507	0.448222	-0.34919	0.786974	em02
FBtr0077127	FBtr0077127_9	-2.61925	0.602029	2.00365	0.831171	em02
FBtr0077145	FBtr0077145_120	-0.250716	0.913905	-0.681271	0.846342	em02
FBtr0077145	FBtr0077145_35	2.06497	0.172042	-2.99696	0.102509	em02
FBtr0077157	FBtr0077157_34	5.85087	0.0571668	-5.45873	0.189801	em02
FBtr0077159	FBtr0077159_239	1.63067	0.636516	-1.12437	0.871344	em02
FBtr0077159	FBtr0077159_431	0.761441	0.156592	-0.255143	0.852613	em02
FBtr0077190	FBtr0077190_107	0.0974885	0.960425	-0.166815	0.965194	em02
FBtr0077190	FBtr0077190_97	0.185843	0.979161	-0.25517	0.989915	em02
FBtr0077224	FBtr0077224_175	2.04349	0.815174	0.293164	0.99179	em02
FBtr0077224	FBtr0077224_222	1.40819	0.835709	0.928469	0.946837	em02
FBtr0077226	FBtr0077226_129	-0.383902	0.432372	0.325091	0.758336	em02
FBtr0077226	FBtr0077226_31	-0.114647	0.945081	0.0558357	0.991462	em02
FBtr0077226	FBtr0077226_94	-0.95853	0.635947	0.899719	0.802358	em02
FBtr0077227	FBtr0077227_3	-1.07985	0.35751	1.01141	0.609172	em02
FBtr0077246	FBtr0077246_110	-1.1361	0.855219	1.41505	0.897318	em02
FBtr0077246	FBtr0077246_338	-0.257095	0.910344	0.536051	0.888276	em02
FBtr0077246	FBtr0077246_375	0.616686	0.786983	-0.33773	0.945845	em02
FBtr0077246	FBtr0077246_382	0.270716	0.924557	0.00824005	0.998928	em02
FBtr0077246	FBtr0077246_508	-0.498664	0.874591	0.77762	0.882778	em02
FBtr0077246	FBtr0077246_542	-0.834893	0.578355	1.11385	0.623316	em02
FBtr0077250	FBtr0077250_207	0.659783	0.751904	0.0299794	0.997813	em02
FBtr0077250	FBtr0077250_269	-0.70764	0.741294	1.3974	0.625696	em02
FBtr0077259	FBtr0077259_80	2.04345	0.715006	-0.0326496	0.998928	em02
FBtr0077262	FBtr0077262_314	-1.1975	0.783655	0.609531	0.947818	em02
FBtr0077268	FBtr0077268_16	1.58639	0.0348323	-1.85192	0.0499764	em02
FBtr0077276	FBtr0077276_420	1.46964	0.3476	-1.76638	0.415669	em02
FBtr0077276	FBtr0077276_692	0.844816	0.472337	-1.14156	0.4869	em02
FBtr0077276	FBtr0077276_851	2.50151	0.000136453	-2.79826	0.000289712	em02
FBtr0077276	FBtr0077276_895	1.31061	0.219152	-1.60736	0.25242	em02
FBtr0077306	FBtr0077306_44	-2.13604	0.316519	2.38421	0.427295	em02
FBtr0077306	FBtr0077306_56	-0.16208	0.970629	0.410255	0.958284	em02
FBtr0077306	FBtr0077306_6	-2.17669	0.237694	2.42486	0.334498	em02
FBtr0077319	FBtr0077319_144	0.873479	0.0362901	-1.83669	0.000151614	em02
FBtr0077319	FBtr0077319_201	1.50965	0.0230273	-2.47285	0.00106263	em02
FBtr0077319	FBtr0077319_206	1.30133	0.179409	-2.26454	0.042714	em02
FBtr0077319	FBtr0077319_41	2.42259	0.0262045	-3.3858	0.00737601	em02
FBtr0077319	FBtr0077319_549	-1.27399	0.0544755	0.310787	0.860064	em02
FBtr0077319	FBtr0077319_600	0.0679724	0.927456	-1.03118	0.0986128	em02
FBtr0077319	FBtr0077319_603	0.0612265	0.936111	-1.02443	0.104651	em02
FBtr0077319	FBtr0077319_681	-1.26595	0.0690094	0.302744	0.873956	em02
FBtr0077319	FBtr0077319_850	-1.3459	0.0854874	0.382696	0.845685	em02
FBtr0077324	FBtr0077324_68	0.35645	0.296848	-0.721176	0.193098	em02
FBtr0077342	FBtr0077342_1021	1.58385	0.0272633	-2.23216	0.00818335	em02
FBtr0077342	FBtr0077342_1046	1.60818	0.0559732	-2.2565	0.024316	em02
FBtr0077342	FBtr0077342_1245	0.682949	0.613962	-1.33126	0.426541	em02
FBtr0077342	FBtr0077342_144	0.600882	0.90993	-1.24919	0.883792	em02
FBtr0077342	FBtr0077342_1515	0.829715	0.446547	-1.47803	0.259683	em02
FBtr0077342	FBtr0077342_211	-1.50599	0.582021	0.857677	0.881797	em02
FBtr0077342	FBtr0077342_500	-2.17866	0.684124	1.53034	0.883792	em02
FBtr0077342	FBtr0077342_614	0.600893	0.925055	-1.2492	0.906216	em02
FBtr0077342	FBtr0077342_736	-2.03433	0.740217	1.38601	0.909123	em02
FBtr0077342	FBtr0077342_792	4.65805	0.168624	-5.30637	0.228072	em02
FBtr0077342	FBtr0077342_944	0.847332	0.540293	-1.49564	0.383896	em02
FBtr0077342	FBtr0077342_954	0.00588469	0.998091	-0.654196	0.875591	em02
FBtr0077342	FBtr0077342_98	2.59659	0.176722	-3.2449	0.182604	em02
FBtr0077344	FBtr0077344_83	-2.36256	0.0053854	2.1045	0.0581947	em02
FBtr0077352	FBtr0077352_32	0.689885	0.776196	-1.39344	0.672278	em02
FBtr0077352	FBtr0077352_75	0.863932	0.669098	-1.56749	0.560714	em02
FBtr0077360	FBtr0077360_31	-1.12158	0.696943	0.345627	0.963544	em02
FBtr0077365	FBtr0077365_14	5.51309	4.7583e-06	-4.18524	0.00512335	em02
FBtr0077365	FBtr0077365_149	0.713375	0.726287	0.614471	0.875047	em02
FBtr0077367	FBtr0077367_28	7.53734	2.53644e-05	-3.66057	0.171927	em02
FBtr0077368	FBtr0077368_288	1.55973	0.000845891	-2.08382	0.00071572	em02
FBtr0077368	FBtr0077368_453	0.942548	0.0852823	-1.46664	0.0459135	em02
FBtr0077368	FBtr0077368_456	0.213479	0.830048	-0.737571	0.5573	em02
FBtr0077368	FBtr0077368_524	0.595184	0.253529	-1.11928	0.118676	em02
FBtr0077368	FBtr0077368_561	1.49634	0.142769	-2.02043	0.122898	em02
FBtr0077369	FBtr0077369_65	0.18584	0.985003	1.75671	0.921404	em02
FBtr0077384	FBtr0077384_211	2.95441	0.00105899	-0.88838	0.643985	em02
FBtr0077384	FBtr0077384_618	-0.010056	0.996879	2.07608	0.212728	em02
FBtr0077387	FBtr0077387_27	0.550845	0.886342	-0.990083	0.875254	em02
FBtr0077387	FBtr0077387_75	0.22367	0.854385	-0.662908	0.673223	em02
FBtr0077391	FBtr0077391_377	1.26526	0.252925	1.22725	0.461824	em02
FBtr0077408	FBtr0077408_34	-0.399101	0.894958	1.03794	0.806221	em02
FBtr0077412	FBtr0077412_154	-0.860927	0.429707	0.564168	0.790149	em02
FBtr0077412	FBtr0077412_92	-1.06467	0.0177939	0.767909	0.264767	em02
FBtr0077426	FBtr0077426_196	1.18579	0.868261	3.3963	0.713715	em02
FBtr0077426	FBtr0077426_378	0.92276	0.903789	3.65933	0.691298	em02
FBtr0077426	FBtr0077426_40	-0.382307	0.968266	4.9644	0.612777	em02
FBtr0077429	FBtr0077429_155	5.67761	0.0184101	-2.33248	0.616445	em02
FBtr0077429	FBtr0077429_95	5.81029	0.000104081	-2.46516	0.311239	em02
FBtr0077432	FBtr0077432_87	-2.13603	0.315547	1.4686	0.699673	em02
FBtr0077435	FBtr0077435_41	2.71238	0.121752	-3.34515	0.131999	em02
FBtr0077439	FBtr0077439_60	3.18582	0.0421198	-2.54698	0.25242	em02
FBtr0077451	FBtr0077451_56	-0.399118	0.942959	0.172158	0.991562	em02
FBtr0077456	FBtr0077456_125	-1.26339	0.0108368	1.00462	0.160002	em02
FBtr0077456	FBtr0077456_163	-0.826308	0.326213	0.567538	0.711732	em02
FBtr0077456	FBtr0077456_6	-0.890942	0.746682	0.632172	0.907981	em02
FBtr0077456	FBtr0077456_98	1.39336	0.0494796	-1.65213	0.0647177	em02
FBtr0077460	FBtr0077460_48	2.64525	0.258574	-2.43397	0.498082	em02
FBtr0077465	FBtr0077465_276	0.501677	0.450685	-0.274042	0.876605	em02
FBtr0077477	FBtr0077477_138	-0.0927838	0.930361	-0.658983	0.585005	em02
FBtr0077479	FBtr0077479_49	0.408274	0.940662	-1.84575	0.796681	em02
FBtr0077490	FBtr0077490_279	2.1858	0.443051	1.51084	0.779909	em02
FBtr0077490	FBtr0077490_419	4.18571	0.229226	-0.489065	0.965873	em02
[truncated: 100,151 more rows]
