# Supplementary material for: Upstream open reading frames buffer translational variability during Drosophila evolution and development
Source: eLife. 2025 Jun 6;14:RP104074. doi: 10.7554/eLife.104074 (PMC12143884; doi:10.7554/eLife.104074)
Supplement: Table 1—source data 2. [file elife-104074-table1-data2.xlsx]

## Sheet: Table1_Source_Data_2
transcript_id	log2Beta	adj_P_log2Beta	stages
FBtr0006151	1.06031	0.660677	em02
FBtr0070007	-1.28824	2.23187e-14	em02
FBtr0070008	-1.50646	4.64266e-10	em02
FBtr0070026	-0.617315	7.47725e-06	em02
FBtr0070027	-1.71296	5.36316e-11	em02
FBtr0070028	-1.85537	9.96543e-27	em02
FBtr0070032	-1.33824	0.0886694	em02
FBtr0070038	0.766965	0.0536096	em02
FBtr0070040	0.674369	0.148412	em02
FBtr0070042	-0.0489798	0.919209	em02
FBtr0070045	0.677877	0.091401	em02
FBtr0070046	0.240305	0.580848	em02
FBtr0070058	-0.00472336	0.992698	em02
FBtr0070064	0.0807076	0.863126	em02
FBtr0070066	2.63649	1.05659e-09	em02
FBtr0070072	2.5308	3.28494e-05	em02
FBtr0070073	0.339153	0.595473	em02
FBtr0070074	1.52183	1.04159e-05	em02
FBtr0070075	3.50604	2.77023e-10	em02
FBtr0070077	1.52104	0.0203522	em02
FBtr0070078	0.11266	0.90299	em02
FBtr0070079	-0.869961	5.32964e-09	em02
FBtr0070080	-0.0772308	0.985003	em02
FBtr0070087	0.249966	0.457816	em02
FBtr0070089	-0.39318	0.00634676	em02
FBtr0070091	4.07279	3.16482e-21	em02
FBtr0070092	-0.815982	1.89565e-08	em02
FBtr0070094	-1.35239	3.59948e-23	em02
FBtr0070099	0.999043	0.214902	em02
FBtr0070101	-1.82933	7.13023e-14	em02
FBtr0070103	-2.02224	0.000834262	em02
FBtr0070106	3.09985	0.000539797	em02
FBtr0070108	0.611552	0.00386077	em02
FBtr0070110	2.09354	5.77477e-06	em02
FBtr0070115	-0.624819	0.0287172	em02
FBtr0070116	-0.158702	0.612431	em02
FBtr0070119	0.235661	0.458263	em02
FBtr0070121	1.74446	1.38312e-09	em02
FBtr0070123	-0.432437	0.265042	em02
FBtr0070134	1.99365	0.00426325	em02
FBtr0070135	-1.05385	6.43328e-07	em02
FBtr0070139	3.9786	3.05757e-10	em02
FBtr0070140	-0.978267	1.79493e-08	em02
FBtr0070145	-2.38221	0.662472	em02
FBtr0070146	-1.13891	9.0827e-07	em02
FBtr0070148	0.483633	0.42153	em02
FBtr0070150	4.16847	1.52867e-12	em02
FBtr0070151	-1.18027	4.25751e-10	em02
FBtr0070155	1.07685	0.00252515	em02
FBtr0070159	-0.630659	0.00140221	em02
FBtr0070160	0.186707	0.666584	em02
FBtr0070165	-0.71204	0.000138366	em02
FBtr0070167	0.205638	0.180172	em02
FBtr0070170	-0.330495	0.194815	em02
FBtr0070171	0.993184	0.832755	em02
FBtr0070173	-1.44418	2.12496e-06	em02
FBtr0070174	4.56663	0.00234334	em02
FBtr0070175	3.31707	0.145589	em02
FBtr0070176	-0.0124116	0.966382	em02
FBtr0070179	3.99951	4.03851e-27	em02
FBtr0070182	0.255264	0.273451	em02
FBtr0070183	-0.0583124	0.982454	em02
FBtr0070186	4.23586	5.97133e-13	em02
FBtr0070187	0.497805	0.787233	em02
FBtr0070188	-0.83544	1.68121e-10	em02
FBtr0070189	0.671298	0.884957	em02
FBtr0070202	0.959753	0.703173	em02
FBtr0070205	-1.54083	5.3077e-07	em02
FBtr0070207	-0.488663	0.0768508	em02
FBtr0070209	-0.513998	0.0621164	em02
FBtr0070211	3.36243	0.00422141	em02
FBtr0070212	-0.29026	0.109769	em02
FBtr0070216	-1.2943	4.83264e-17	em02
FBtr0070230	0.982692	8.74925e-05	em02
FBtr0070231	-2.79227	0.299322	em02
FBtr0070233	-0.0516841	0.884615	em02
FBtr0070234	-0.249314	0.200897	em02
FBtr0070235	-1.05814	1.99669e-12	em02
FBtr0070236	-1.30454	1.55418e-09	em02
FBtr0070238	1.55757	0.164767	em02
FBtr0070245	0.390852	0.498846	em02
FBtr0070250	-0.686431	0.0510909	em02
FBtr0070253	-0.338995	0.898414	em02
FBtr0070255	0.159329	0.554516	em02
FBtr0070259	-0.720357	0.000331724	em02
FBtr0070260	-0.12258	0.808135	em02
FBtr0070269	-0.338968	0.0429637	em02
FBtr0070270	0.128374	0.726287	em02
FBtr0070279	-0.666741	0.000754616	em02
FBtr0070283	-0.695028	0.00138186	em02
FBtr0070289	0.0979739	0.925746	em02
FBtr0070293	-0.253102	0.909172	em02
FBtr0070295	1.46602	0.737231	em02
FBtr0070296	-1.08425	0.00538437	em02
FBtr0070297	-0.599551	8.646e-06	em02
FBtr0070298	4.17284	0.149642	em02
FBtr0070308	0.359796	0.115646	em02
FBtr0070310	-2.40954	2.1671e-34	em02
FBtr0070311	-1.23407	8.3408e-12	em02
FBtr0070312	-0.0851802	0.798894	em02
FBtr0070313	0.0910693	0.780099	em02
FBtr0070314	-0.671376	1.27212e-05	em02
FBtr0070315	-0.459715	0.0130708	em02
FBtr0070316	0.064825	0.872737	em02
FBtr0070317	-0.546149	0.00115193	em02
FBtr0070318	-0.565077	0.00104391	em02
FBtr0070321	-0.383614	0.0555793	em02
FBtr0070328	4.03061	1.04934e-08	em02
FBtr0070330	1.35914	6.71572e-05	em02
FBtr0070331	-0.833757	4.65339e-05	em02
FBtr0070334	-0.402973	0.0288048	em02
FBtr0070340	1.45335	0.398275	em02
FBtr0070341	0.489513	0.620532	em02
FBtr0070345	-0.792563	1.45135e-05	em02
FBtr0070346	-0.357031	0.357467	em02
FBtr0070347	-0.396186	0.0210252	em02
FBtr0070349	-1.85523	9.64303e-09	em02
FBtr0070350	-1.83767	1.50372e-39	em02
FBtr0070355	2.4082	0.751363	em02
FBtr0070363	-0.473669	0.0211777	em02
FBtr0070364	-0.232567	0.474473	em02
FBtr0070365	-1.57851	7.82545e-12	em02
FBtr0070366	-0.18635	0.264032	em02
FBtr0070367	0.109565	0.831147	em02
FBtr0070369	-0.168204	0.73682	em02
FBtr0070371	0.308144	0.0401093	em02
FBtr0070372	-0.361668	0.314169	em02
FBtr0070375	-0.735752	0.0835273	em02
FBtr0070376	-0.241272	0.257163	em02
FBtr0070379	-0.617375	5.35275e-06	em02
FBtr0070381	0.467612	0.178847	em02
FBtr0070384	-1.09497	0.000557903	em02
FBtr0070385	-0.112216	0.726548	em02
FBtr0070386	-0.602325	0.00828235	em02
FBtr0070387	4.50133	4.49123e-05	em02
FBtr0070388	-0.0435954	0.972977	em02
FBtr0070389	-1.75584	1.01484e-19	em02
FBtr0070390	-0.0538611	0.928254	em02
FBtr0070392	0.0872806	0.796766	em02
FBtr0070393	-0.860446	0.00707255	em02
FBtr0070396	-1.84661	2.0976e-19	em02
FBtr0070398	-0.840852	8.08964e-09	em02
FBtr0070401	-0.5157	0.00046346	em02
FBtr0070405	-1.01289	0.000129807	em02
FBtr0070406	2.85569	0.0397676	em02
FBtr0070407	1.929	0.0332846	em02
FBtr0070408	-0.714502	1.9322e-06	em02
FBtr0070411	0.0146796	0.971417	em02
FBtr0070412	-0.237696	0.570114	em02
FBtr0070414	-0.502308	0.0177446	em02
FBtr0070417	-1.63356	0.0381819	em02
FBtr0070418	-0.0567194	0.838014	em02
FBtr0070419	0.24737	0.181424	em02
FBtr0070420	0.147198	0.430778	em02
FBtr0070424	-1.09955	0.788643	em02
FBtr0070425	0.145357	0.469262	em02
FBtr0070429	-0.58666	0.0534874	em02
FBtr0070431	0.168472	0.62121	em02
FBtr0070432	1.74553	6.38844e-12	em02
FBtr0070433	-0.871646	2.6909e-07	em02
FBtr0070434	-0.236558	0.166239	em02
FBtr0070438	-0.192555	0.524398	em02
FBtr0070439	0.351255	0.0227193	em02
FBtr0070441	2.07023	7.55114e-10	em02
FBtr0070442	-3.82444	5.72764e-40	em02
FBtr0070445	-0.598503	0.0437808	em02
FBtr0070446	-0.819261	3.73458e-06	em02
FBtr0070447	0.042295	0.95568	em02
FBtr0070448	-0.539626	0.00265793	em02
FBtr0070460	0.759735	0.00662265	em02
FBtr0070461	3.25236	5.30423e-40	em02
FBtr0070462	3.56024	0.000370645	em02
FBtr0070477	-4.39691	0.063763	em02
FBtr0070478	-0.750128	0.0042633	em02
FBtr0070479	0.125493	0.530291	em02
FBtr0070481	0.242472	0.139855	em02
FBtr0070484	-0.677083	0.188356	em02
FBtr0070485	-0.90294	0.109474	em02
FBtr0070486	0.0382553	0.990621	em02
FBtr0070487	-0.759378	5.66166e-07	em02
FBtr0070488	0.852647	0.0213283	em02
FBtr0070490	1.55782	0.112172	em02
FBtr0070491	2.19362	3.50107e-18	em02
FBtr0070494	-0.953685	0.158061	em02
FBtr0070495	-1.86628	3.10977e-20	em02
FBtr0070497	0.882839	0.004884	em02
FBtr0070498	0.193604	0.204283	em02
FBtr0070499	-0.895542	4.59182e-05	em02
FBtr0070502	-0.806914	4.58166e-06	em02
FBtr0070507	-1.82049	8.04358e-12	em02
FBtr0070508	-0.454178	0.0716995	em02
FBtr0070509	0.60088	0.829304	em02
FBtr0070525	0.176049	0.425261	em02
FBtr0070527	3.42847	0.0172028	em02
FBtr0070536	1.18581	0.740973	em02
FBtr0070543	2.44541	2.06703e-18	em02
FBtr0070550	1.06031	0.639531	em02
FBtr0070554	-2.69452	0.348786	em02
FBtr0070556	-2.61923	0.614531	em02
FBtr0070558	2.47122	9.3442e-09	em02
FBtr0070559	-0.551466	0.0983463	em02
FBtr0070562	1.08987	0.000128658	em02
FBtr0070568	-0.310241	0.0657288	em02
FBtr0070569	1.86264	5.78794e-22	em02
FBtr0070583	0.766115	5.50058e-09	em02
FBtr0070586	-0.621483	0.00097039	em02
FBtr0070588	-0.125523	0.965191	em02
FBtr0070589	2.40572	0.342001	em02
FBtr0070590	-0.0540654	0.88567	em02
FBtr0070611	1.4421	8.03419e-16	em02
FBtr0070612	2.47844	1.88835e-05	em02
FBtr0070613	0.529234	0.00538072	em02
FBtr0070616	-0.289619	0.381477	em02
FBtr0070625	-1.23318	8.39868e-05	em02
FBtr0070626	-0.486826	0.0034601	em02
FBtr0070627	-1.6171	1.92098e-25	em02
FBtr0070638	-0.466245	0.080681	em02
FBtr0070639	-0.637984	0.0485419	em02
FBtr0070642	-1.02522	6.2318e-06	em02
FBtr0070643	-1.18539	0.000100116	em02
FBtr0070644	-1.30088	8.70938e-16	em02
FBtr0070648	-0.627026	0.00618283	em02
FBtr0070650	-0.825601	2.0844e-07	em02
FBtr0070652	-0.0090173	0.972977	em02
FBtr0070655	0.096237	0.869446	em02
FBtr0070656	-3.08042	7.42557e-49	em02
FBtr0070668	-0.994065	5.9805e-12	em02
FBtr0070669	-0.0950775	0.684006	em02
FBtr0070670	0.239474	0.60285	em02
FBtr0070671	1.1637	1.22779e-05	em02
FBtr0070675	-0.310727	0.0640541	em02
FBtr0070676	-0.269793	0.431936	em02
FBtr0070677	-0.583432	0.244141	em02
FBtr0070678	0.167001	0.562217	em02
FBtr0070680	2.98395	1.39675e-31	em02
FBtr0070681	4.78026	2.83248e-61	em02
FBtr0070682	1.43278	2.9797e-12	em02
FBtr0070683	-0.347413	0.203302	em02
FBtr0070685	-0.219676	0.373527	em02
FBtr0070686	-0.534516	0.0122136	em02
FBtr0070688	0.688339	0.78737	em02
FBtr0070690	-0.318857	0.117915	em02
FBtr0070698	-1.03202	3.42676e-09	em02
FBtr0070699	0.260017	0.190807	em02
FBtr0070701	-2.24622	4.05625e-08	em02
FBtr0070702	-0.728198	0.00206239	em02
FBtr0070704	-1.73353	6.31067e-10	em02
FBtr0070711	-0.18385	0.390799	em02
FBtr0070712	-1.98401	0.607978	em02
FBtr0070713	-0.981578	0.540809	em02
FBtr0070721	-0.240042	0.780521	em02
FBtr0070723	-0.464483	0.160957	em02
FBtr0070724	-0.286221	0.153096	em02
FBtr0070738	0.176821	0.800075	em02
FBtr0070741	-0.0771202	0.989781	em02
FBtr0070748	-0.481706	0.0089438	em02
FBtr0070749	-1.07561	0.00841892	em02
FBtr0070750	-4.25865	0.00133318	em02
FBtr0070751	-0.407091	0.022011	em02
FBtr0070752	0.509497	0.000844755	em02
FBtr0070755	-1.17168	0.622838	em02
FBtr0070756	-1.08187	9.2802e-16	em02
FBtr0070757	0.97018	0.847391	em02
FBtr0070758	-3.27396	0.226827	em02
FBtr0070762	0.258427	0.39017	em02
FBtr0070763	-2.71617	6.00318e-51	em02
FBtr0070764	-0.682751	0.566754	em02
FBtr0070772	-1.11856	9.08227e-06	em02
FBtr0070777	-1.65006	0.0337028	em02
FBtr0070780	1.63211	0.223148	em02
FBtr0070781	1.93833	0.0665972	em02
FBtr0070782	0.853608	0.00223021	em02
FBtr0070785	-1.04238	2.75456e-11	em02
FBtr0070795	-0.189008	0.671884	em02
FBtr0070798	-1.08815	3.5555e-17	em02
FBtr0070799	-0.572119	0.00481491	em02
FBtr0070800	1.01576	0.00268386	em02
FBtr0070804	0.852412	0.0175174	em02
FBtr0070807	-2.3349	3.72019e-31	em02
FBtr0070808	-1.84163	0.720958	em02
FBtr0070809	0.0388633	0.965066	em02
FBtr0070821	-0.216129	0.453089	em02
FBtr0070822	-0.348702	0.583734	em02
FBtr0070824	-1.45788	0.00175332	em02
FBtr0070825	0.379493	0.309199	em02
FBtr0070827	-0.266485	0.165362	em02
FBtr0070828	-1.06165	0.00430903	em02
FBtr0070829	-0.407263	0.111901	em02
FBtr0070830	0.376784	0.0914494	em02
FBtr0070832	-1.03267	0.00202591	em02
FBtr0070836	4.09509	2.35841e-08	em02
FBtr0070837	-0.0704009	0.892025	em02
FBtr0070840	0.980141	2.85192e-07	em02
FBtr0070841	-0.841472	8.57239e-07	em02
FBtr0070843	-2.06583	4.9762e-31	em02
FBtr0070846	-1.73509	9.19773e-14	em02
FBtr0070847	0.518137	0.116394	em02
FBtr0070849	-1.12018	1.07859e-08	em02
FBtr0070852	0.198503	0.808828	em02
FBtr0070859	1.0021	0.000216278	em02
FBtr0070860	0.243419	0.472652	em02
FBtr0070865	-0.140924	0.696963	em02
FBtr0070866	-0.125479	0.531034	em02
FBtr0070867	-0.310065	0.13217	em02
FBtr0070874	0.241538	0.296302	em02
FBtr0070877	0.241847	0.484881	em02
FBtr0070884	-1.10603	6.27536e-17	em02
FBtr0070887	2.28534	0.350612	em02
FBtr0070889	1.23316	4.96653e-05	em02
FBtr0070890	2.3662	0.000506168	em02
FBtr0070892	0.977886	0.0235369	em02
FBtr0070894	-0.946565	5.74329e-09	em02
FBtr0070895	-1.26124	0.00034324	em02
FBtr0070896	-0.5919	0.0696724	em02
FBtr0070897	0.244955	0.131245	em02
FBtr0070898	-1.23026	6.36642e-05	em02
FBtr0070899	-0.0664647	0.884957	em02
FBtr0070900	-4.18951	0.355878	em02
FBtr0070903	0.388995	0.565068	em02
FBtr0070905	-0.888141	0.00126912	em02
FBtr0070906	-1.6614	6.02064e-19	em02
FBtr0070912	-0.407401	0.0420128	em02
FBtr0070913	2.66161	0.00910867	em02
FBtr0070914	-1.26646	0.000235482	em02
FBtr0070915	0.891373	0.10871	em02
FBtr0070918	-0.770832	7.30703e-06	em02
FBtr0070921	-1.51988	1.4075e-19	em02
FBtr0070922	-1.41742	8.47364e-07	em02
FBtr0070924	0.664315	0.000157473	em02
FBtr0070925	-0.815258	1.70946e-05	em02
FBtr0070930	-1.18749	7.58236e-10	em02
FBtr0070933	-0.52742	0.110573	em02
FBtr0070937	0.114541	0.529489	em02
FBtr0070946	-0.194302	0.515481	em02
FBtr0070948	-0.982623	0.012354	em02
FBtr0070950	-1.92207	2.86423e-10	em02
FBtr0070952	0.075533	0.829296	em02
FBtr0070953	-0.832351	2.32363e-06	em02
FBtr0070956	-0.655065	2.10088e-05	em02
FBtr0070959	-0.566157	0.00530369	em02
FBtr0070960	-0.738748	0.724463	em02
FBtr0070961	-0.489554	0.0345322	em02
FBtr0070963	-0.327734	0.236724	em02
FBtr0070970	0.609537	0.0812763	em02
FBtr0070972	-0.260496	0.181778	em02
FBtr0070974	-0.549889	4.22022e-05	em02
FBtr0070980	-0.0458839	0.958493	em02
FBtr0070987	-0.931338	0.189631	em02
FBtr0070988	-0.221798	0.413528	em02
FBtr0070989	2.79223	8.68406e-05	em02
FBtr0070990	-0.72795	0.000831627	em02
FBtr0070991	-2.05088	3.26168e-29	em02
FBtr0070992	-0.439535	0.00358979	em02
FBtr0070993	-0.20726	0.375374	em02
FBtr0070994	-2.09846	6.14232e-46	em02
FBtr0071003	-2.29862	2.37131e-16	em02
FBtr0071004	1.7121	1.80999e-06	em02
FBtr0071005	0.860927	0.00108196	em02
FBtr0071007	1.05946	0.046164	em02
FBtr0071009	-0.817433	0.000221296	em02
FBtr0071010	0.511372	0.162569	em02
FBtr0071015	-2.68344	3.25069e-08	em02
FBtr0071017	-0.570575	0.156968	em02
FBtr0071019	0.241291	0.15491	em02
FBtr0071020	0.278119	0.155548	em02
FBtr0071032	1.40175	0.00252133	em02
FBtr0071033	-0.0850647	0.695583	em02
FBtr0071035	1.67534	0.218512	em02
FBtr0071036	2.80553	2.12184e-41	em02
FBtr0071038	-0.498665	0.0113184	em02
FBtr0071039	-0.683863	4.99906e-06	em02
FBtr0071041	-0.945647	1.19608e-05	em02
FBtr0071042	-0.861378	5.35438e-07	em02
FBtr0071047	-1.02812	3.31366e-06	em02
FBtr0071048	1.97941	6.41464e-11	em02
FBtr0071049	0.316405	0.0669207	em02
FBtr0071051	2.11389	0.56028	em02
FBtr0071065	-0.937155	1.74376e-05	em02
FBtr0071066	-0.606336	1.18971e-05	em02
FBtr0071070	-0.310415	0.368217	em02
FBtr0071071	-0.625408	0.000116212	em02
FBtr0071072	0.113655	0.766716	em02
FBtr0071073	-0.379018	0.0914396	em02
FBtr0071076	-0.689439	0.000332403	em02
FBtr0071077	0.284127	0.0440942	em02
FBtr0071079	-0.784977	6.21201e-05	em02
FBtr0071089	-0.0519476	0.845266	em02
FBtr0071090	-0.133012	0.561888	em02
FBtr0071091	-0.648114	0.000229194	em02
FBtr0071092	0.325177	0.491821	em02
FBtr0071093	-0.715428	2.91929e-05	em02
FBtr0071094	-0.743664	0.0532185	em02
FBtr0071096	-0.347512	0.0809686	em02
FBtr0071101	-0.480121	0.0377259	em02
FBtr0071105	-0.137693	0.743506	em02
FBtr0071107	-0.486457	0.000278798	em02
FBtr0071109	-0.606898	0.0503248	em02
FBtr0071112	-1.03329	0.00264969	em02
FBtr0071116	4.10742	1.51416e-05	em02
FBtr0071117	0.176612	0.354919	em02
FBtr0071123	-1.44797	0.483158	em02
FBtr0071125	-1.445	1.24469e-12	em02
FBtr0071129	-0.271088	0.343016	em02
FBtr0071131	0.8128	2.13013e-08	em02
FBtr0071132	-0.296552	0.169843	em02
FBtr0071134	-0.176694	0.966186	em02
FBtr0071135	0.00691452	0.994022	em02
FBtr0071140	-0.0905671	0.772101	em02
FBtr0071142	0.452743	0.000787328	em02
FBtr0071143	-0.895204	2.96244e-11	em02
FBtr0071151	0.606099	3.21247e-06	em02
FBtr0071152	-0.0912715	0.709267	em02
FBtr0071153	-1.19062	0.342198	em02
FBtr0071155	-1.579	0.000172306	em02
FBtr0071157	-0.0649141	0.904552	em02
FBtr0071158	-0.181474	0.81136	em02
FBtr0071166	-0.880267	0.00614138	em02
FBtr0071168	-0.687901	0.0158672	em02
FBtr0071171	-0.633307	3.14525e-06	em02
FBtr0071174	-1.70496	5.39039e-12	em02
FBtr0071175	-0.424068	0.0042641	em02
FBtr0071178	1.4607	0.381562	em02
FBtr0071179	0.262756	0.370802	em02
FBtr0071180	-1.12816	1.8831e-10	em02
FBtr0071183	-1.83442	9.19097e-10	em02
FBtr0071188	-1.4285	8.73737e-17	em02
FBtr0071189	0.670926	0.425261	em02
FBtr0071190	-1.175	5.97588e-17	em02
FBtr0071191	0.936704	9.05085e-05	em02
FBtr0071192	0.599224	0.0365033	em02
FBtr0071194	0.136879	0.418185	em02
FBtr0071198	-0.201356	0.374989	em02
FBtr0071212	-1.05255	1.58344e-05	em02
FBtr0071214	-1.65155	4.28548e-13	em02
FBtr0071218	-0.862749	2.38808e-07	em02
FBtr0071219	-0.781322	0.000921948	em02
FBtr0071221	1.35982	8.02369e-08	em02
FBtr0071222	-0.776508	0.00307665	em02
FBtr0071223	0.346499	0.446763	em02
FBtr0071225	1.36689	0.198817	em02
FBtr0071228	-0.67102	0.0267441	em02
FBtr0071233	0.0622488	0.919836	em02
FBtr0071234	-0.335159	0.0440809	em02
FBtr0071237	1.27754	2.5121e-08	em02
FBtr0071239	2.4082	0.751363	em02
FBtr0071240	2.40822	0.214943	em02
FBtr0071241	-1.44464	1.52762e-17	em02
FBtr0071245	2.04683	5.00287e-07	em02
FBtr0071246	0.652205	0.00440968	em02
FBtr0071248	3.79524	0.000109091	em02
FBtr0071249	1.97727	0.000204919	em02
FBtr0071250	-0.677365	6.85561e-07	em02
FBtr0071251	-0.687755	0.00918603	em02
FBtr0071253	3.62435	2.79836e-06	em02
FBtr0071255	0.174142	0.475103	em02
FBtr0071263	-0.28291	0.721767	em02
FBtr0071264	-5.20411	0.162721	em02
FBtr0071265	2.85082	0.641212	em02
FBtr0071266	-0.926738	0.000269419	em02
FBtr0071268	-0.0275008	0.966186	em02
FBtr0071270	-0.470701	0.569428	em02
FBtr0071279	3.8766	0.000341268	em02
FBtr0071280	0.327313	0.0426733	em02
FBtr0071281	0.281709	0.119212	em02
FBtr0071284	0.0988313	0.822636	em02
FBtr0071285	-0.172047	0.277267	em02
FBtr0071286	0.601808	0.0125875	em02
FBtr0071287	3.16378	0.159059	em02
FBtr0071289	-0.0289952	0.967519	em02
FBtr0071293	-0.0203596	0.964064	em02
FBtr0071296	-0.964234	4.59971e-06	em02
FBtr0071299	-1.48881	2.20534e-25	em02
FBtr0071300	-1.05609	5.14544e-05	em02
FBtr0071305	0.602924	0.151727	em02
FBtr0071306	-1.15992	6.32055e-05	em02
FBtr0071313	0.513115	0.00910867	em02
FBtr0071314	-0.791744	0.0198161	em02
FBtr0071317	-0.96152	5.33644e-13	em02
FBtr0071319	0.122063	0.522159	em02
FBtr0071324	-0.287305	0.446177	em02
FBtr0071326	0.598989	4.22022e-05	em02
FBtr0071327	0.644311	1.02115e-05	em02
FBtr0071329	1.64393	0.416538	em02
FBtr0071331	-0.746769	0.000129807	em02
FBtr0071332	-0.336638	0.175067	em02
FBtr0071334	-0.00511384	0.989639	em02
FBtr0071338	3.51859	3.05332e-09	em02
FBtr0071339	-0.0816049	0.859506	em02
FBtr0071342	-0.113455	0.594162	em02
FBtr0071343	-0.733123	0.00585314	em02
FBtr0071344	-0.400656	0.0699957	em02
FBtr0071345	-0.00111478	0.998511	em02
FBtr0071348	-1.57158	1.71199e-05	em02
FBtr0071349	-0.547592	0.00165257	em02
FBtr0071350	-0.275687	0.363708	em02
FBtr0071353	-0.0989726	0.66438	em02
FBtr0071358	-0.270005	0.375967	em02
FBtr0071360	0.121922	0.783248	em02
FBtr0071361	-0.61724	0.000474483	em02
FBtr0071363	-0.609504	0.00660941	em02
FBtr0071367	-0.0435714	0.908472	em02
FBtr0071368	-0.907291	2.01192e-10	em02
FBtr0071371	1.3544	0.00145831	em02
FBtr0071372	0.365894	0.0548881	em02
FBtr0071379	1.6636	2.17177e-05	em02
FBtr0071389	1.94876	0.519628	em02
FBtr0071390	3.41869	2.73742e-06	em02
FBtr0071391	4.94911	0.000677712	em02
FBtr0071393	-0.339927	0.340456	em02
FBtr0071403	2.85027	0.0098905	em02
FBtr0071405	-0.582098	0.0628993	em02
FBtr0071410	4.10386	0.000272954	em02
FBtr0071415	0.0817316	0.810494	em02
FBtr0071419	-5.03653	0.0228464	em02
FBtr0071424	-2.26162	0.334438	em02
FBtr0071430	-1.06846	1.02013e-12	em02
FBtr0071438	-0.346751	0.198784	em02
FBtr0071441	1.05091	0.0198743	em02
FBtr0071444	-1.57052	5.89548e-31	em02
FBtr0071446	-0.750255	0.0018401	em02
FBtr0071449	-0.0471146	0.884615	em02
FBtr0071450	0.0127016	0.983859	em02
FBtr0071451	0.495167	0.167991	em02
FBtr0071458	1.65977	0.41774	em02
FBtr0071459	5.44621	0.0322456	em02
FBtr0071460	-1.82495	4.97469e-12	em02
FBtr0071465	0.469477	0.022471	em02
FBtr0071470	-0.862681	0.00824004	em02
FBtr0071472	-0.389959	0.0116013	em02
FBtr0071481	6.16307	7.21242e-05	em02
FBtr0071484	-0.70442	0.894752	em02
FBtr0071487	0.823293	0.374722	em02
FBtr0071491	1.26328	2.97818e-08	em02
FBtr0071493	2.41925	1.53337e-05	em02
FBtr0071494	1.20534	3.59237e-06	em02
FBtr0071497	-2.38322	8.56415e-39	em02
FBtr0071498	0.390373	0.355271	em02
FBtr0071500	1.1155	1.10341e-15	em02
FBtr0071503	0.0320179	0.953901	em02
FBtr0071510	2.33153	0.00422069	em02
FBtr0071511	-0.183561	0.582574	em02
FBtr0071519	4.12796	9.99353e-50	em02
FBtr0071520	-0.0743517	0.856681	em02
FBtr0071522	-0.648408	0.0136104	em02
FBtr0071526	0.252777	0.380995	em02
FBtr0071530	-0.0386617	0.899915	em02
FBtr0071532	-0.621578	0.00865725	em02
FBtr0071533	1.57743	1.51141e-11	em02
FBtr0071545	1.17664	0.00206405	em02
FBtr0071546	-0.457246	0.160615	em02
FBtr0071547	-0.417773	0.106053	em02
FBtr0071548	-0.89223	4.815e-11	em02
FBtr0071549	-0.715707	0.000738486	em02
FBtr0071553	2.01596	0.62996	em02
FBtr0071556	1.13864	0.174119	em02
FBtr0071559	-2.98404	0.333194	em02
FBtr0071562	1.287	0.000889413	em02
FBtr0071563	0.246734	0.469862	em02
FBtr0071569	-0.611056	0.000873045	em02
FBtr0071573	-0.261306	0.3476	em02
FBtr0071575	-0.574452	0.00654957	em02
FBtr0071576	-1.07769	7.77158e-06	em02
FBtr0071580	1.55602	0.184132	em02
FBtr0071582	-1.0323	4.5397e-08	em02
FBtr0071583	2.61239	3.47785e-05	em02
FBtr0071590	0.73864	5.39153e-06	em02
FBtr0071592	1.19707	5.56091e-09	em02
FBtr0071600	-1.17874	5.4165e-09	em02
FBtr0071606	-2.68319	1.39126e-12	em02
FBtr0071607	-0.546503	0.0249884	em02
FBtr0071608	-0.313709	0.819202	em02
FBtr0071609	-0.3727	0.0793675	em02
FBtr0071610	2.30895	4.47046e-09	em02
FBtr0071613	-0.179855	0.31837	em02
FBtr0071615	0.274545	0.12875	em02
FBtr0071616	-1.34394	8.49061e-14	em02
FBtr0071617	-0.390665	0.209673	em02
FBtr0071618	0.582002	0.129754	em02
FBtr0071623	1.98268	7.6064e-11	em02
FBtr0071625	4.61432	3.53384e-09	em02
FBtr0071628	0.252301	0.350682	em02
FBtr0071636	-0.192636	0.295611	em02
FBtr0071637	1.34903	1.58768e-13	em02
FBtr0071639	-3.42581	3.67958e-08	em02
FBtr0071640	-1.83435	0.629575	em02
FBtr0071641	0.0361009	0.889793	em02
FBtr0071654	2.22002	1.54441e-28	em02
FBtr0071658	-2.74013	7.60096e-27	em02
FBtr0071661	0.121871	0.522159	em02
FBtr0071663	0.312754	0.135389	em02
FBtr0071666	-0.946219	1.80715e-13	em02
FBtr0071670	-0.17011	0.482922	em02
FBtr0071672	-0.0606009	0.899314	em02
FBtr0071673	3.65415	2.28388e-34	em02
FBtr0071676	-0.594459	0.00951435	em02
FBtr0071678	1.60084	0.738031	em02
FBtr0071679	-0.519034	0.0804353	em02
FBtr0071680	0.352674	0.30167	em02
FBtr0071683	0.122191	0.49529	em02
FBtr0071686	-0.778895	1.29376e-07	em02
FBtr0071687	-2.24174	2.14373e-20	em02
FBtr0071688	0.396953	0.44296	em02
FBtr0071690	3.68176	0.0416089	em02
FBtr0071697	4.16224	0.0483713	em02
FBtr0071700	0.905313	1.04496e-05	em02
FBtr0071701	-0.127194	0.688069	em02
FBtr0071708	-0.0805488	0.878767	em02
FBtr0071716	-1.44393	0.376727	em02
FBtr0071726	0.27778	0.0566129	em02
FBtr0071746	-0.157798	0.692694	em02
FBtr0071755	-0.401641	0.103045	em02
FBtr0071756	-1.26833	5.08329e-08	em02
FBtr0071758	-0.114523	0.884957	em02
FBtr0071761	-0.779416	1.4926e-06	em02
FBtr0071762	2.9937	5.70379e-06	em02
FBtr0071763	-0.953101	2.99315e-13	em02
FBtr0071766	-0.0771786	0.992475	em02
FBtr0071767	0.0233836	0.959434	em02
FBtr0071769	2.00786	0.145669	em02
FBtr0071770	-0.622545	2.86073e-05	em02
FBtr0071771	-0.316327	0.184621	em02
FBtr0071774	-0.897945	2.16013e-08	em02
FBtr0071775	2.17159	0.00176953	em02
FBtr0071777	4.20483	8.82796e-36	em02
FBtr0071786	-2.11908	2.07305e-13	em02
FBtr0071787	-0.557703	0.00347371	em02
FBtr0071790	-0.441882	0.00128562	em02
FBtr0071800	-1.018	1.92829e-08	em02
FBtr0071802	-1.38053	2.26995e-13	em02
FBtr0071803	2.33794	0.554492	em02
FBtr0071811	3.34602	0.00117178	em02
FBtr0071816	3.54132	1.68904e-37	em02
FBtr0071820	-0.338698	0.290026	em02
FBtr0071821	4.7729	1.83533e-09	em02
FBtr0071822	3.65833	7.52763e-06	em02
FBtr0071823	-0.399047	0.948746	em02
FBtr0071826	3.11383	0.000178977	em02
FBtr0071827	1.28291	1.87361e-08	em02
FBtr0071828	-2.469	0.000764498	em02
FBtr0071830	-0.399123	0.946508	em02
FBtr0071832	-2.47428	5.70748e-34	em02
FBtr0071833	0.558025	0.000130689	em02
FBtr0071834	2.02146	7.51042e-40	em02
FBtr0071835	3.49725	0.000511989	em02
FBtr0071838	-0.173654	0.410222	em02
FBtr0071841	2.51751	5.72772e-13	em02
FBtr0071842	0.673319	3.04396e-07	em02
FBtr0071843	0.0287875	0.957709	em02
FBtr0071845	4.33048	1.20345e-15	em02
FBtr0071848	4.69907	4.00399e-07	em02
FBtr0071849	3.25551	0.00199067	em02
FBtr0071853	1.01594	0.725698	em02
FBtr0071855	0.642552	0.199133	em02
FBtr0071856	-0.147779	0.497672	em02
FBtr0071860	0.549107	0.000723915	em02
FBtr0071861	4.91134	5.45008e-05	em02
FBtr0071867	1.0603	0.760994	em02
FBtr0071868	-1.00211	6.78854e-07	em02
FBtr0071883	-0.519876	0.241867	em02
FBtr0071890	2.6185	2.65757e-07	em02
FBtr0071897	0.481575	0.335078	em02
FBtr0071903	0.00387212	0.991867	em02
FBtr0071904	0.883058	0.0668557	em02
FBtr0071905	-1.0475	1.13867e-05	em02
FBtr0071907	-0.0856844	0.844477	em02
FBtr0071910	1.34769	1.17533e-24	em02
FBtr0071911	-0.11718	0.889729	em02
FBtr0071920	-0.0365566	0.993559	em02
FBtr0071921	-0.984078	0.832276	em02
FBtr0071922	3.75769	5.91364e-29	em02
FBtr0071931	3.40818	0.145133	em02
FBtr0071933	-0.598717	0.0750521	em02
FBtr0071934	4.70806	2.47365e-07	em02
FBtr0071935	0.00538803	0.992475	em02
FBtr0071936	-0.647239	9.06659e-07	em02
FBtr0071937	-0.408955	0.016913	em02
FBtr0071938	0.287207	0.16105	em02
FBtr0071942	0.92057	0.477765	em02
FBtr0071951	-0.617574	0.00321852	em02
FBtr0071953	1.36528	1.18301e-09	em02
FBtr0071958	-0.82078	0.000713907	em02
FBtr0071963	0.129598	0.959232	em02
FBtr0071978	1.47535	0.365271	em02
FBtr0071980	2.24472	0.34208	em02
FBtr0071982	-0.248854	0.189102	em02
FBtr0071984	-1.07722	2.5226e-05	em02
FBtr0071985	0.158163	0.591099	em02
FBtr0071988	-0.490026	0.157924	em02
FBtr0071994	-0.447538	0.181596	em02
FBtr0071995	-0.769474	0.0566906	em02
FBtr0071996	-0.000864539	0.998511	em02
FBtr0072010	-0.382988	0.0696531	em02
FBtr0072014	-0.0831314	0.69683	em02
FBtr0072027	-0.439727	0.0639639	em02
FBtr0072029	-0.541662	0.00363335	em02
FBtr0072030	-0.958624	1.28462e-05	em02
FBtr0072033	-0.941451	0.00042504	em02
FBtr0072036	-0.954242	2.26834e-12	em02
FBtr0072037	0.462563	0.00290369	em02
FBtr0072038	-0.82838	0.0410267	em02
FBtr0072047	-1.17002	0.471215	em02
FBtr0072049	0.281974	0.749129	em02
FBtr0072058	-0.474442	0.0472593	em02
FBtr0072059	1.77073	0.832597	em02
FBtr0072060	-1.14097	6.42991e-06	em02
FBtr0072061	-0.557744	0.00281569	em02
FBtr0072062	0.392828	0.041513	em02
FBtr0072064	0.661616	0.0237472	em02
FBtr0072065	-0.98401	0.899701	em02
FBtr0072073	-0.802332	0.00183012	em02
FBtr0072083	-0.310748	0.555311	em02
FBtr0072084	0.847291	0.003257	em02
FBtr0072085	-1.35746	9.38077e-12	em02
FBtr0072087	-0.784029	7.80855e-05	em02
FBtr0072091	-0.160808	0.519167	em02
FBtr0072095	-0.684825	1.55412e-05	em02
FBtr0072097	-0.415038	0.0989041	em02
FBtr0072099	1.06661	0.00531641	em02
FBtr0072100	3.50774	0.0262757	em02
FBtr0072111	1.41305	1.44984e-11	em02
FBtr0072112	-0.412249	0.072466	em02
FBtr0072114	-0.440948	0.00252133	em02
FBtr0072117	1.72962	0.405107	em02
FBtr0072120	-0.566129	0.0122136	em02
FBtr0072124	0.00601502	0.984442	em02
FBtr0072127	2.65784	4.28258e-30	em02
FBtr0072128	-0.537125	0.0217492	em02
FBtr0072129	0.00366046	0.994488	em02
FBtr0072132	-0.959023	2.26081e-09	em02
FBtr0072133	-0.926467	0.0304359	em02
FBtr0072134	-0.602616	5.98244e-06	em02
FBtr0072140	3.78785	0.000119676	em02
FBtr0072141	0.311174	0.121667	em02
FBtr0072143	2.84409	3.92637e-17	em02
FBtr0072145	0.11335	0.591739	em02
FBtr0072146	-2.70418	0.501881	em02
FBtr0072147	0.0112281	0.979442	em02
FBtr0072151	0.262363	0.409212	em02
FBtr0072152	0.699675	0.0059981	em02
FBtr0072154	-1.70551	1.06139e-22	em02
FBtr0072156	-1.60965	3.14997e-30	em02
FBtr0072157	3.33756	1.75731e-12	em02
FBtr0072162	1.055	0.329763	em02
FBtr0072163	-0.333016	0.0469131	em02
FBtr0072164	-0.367377	0.918597	em02
FBtr0072165	0.578573	0.0157443	em02
FBtr0072166	0.165964	0.624118	em02
FBtr0072168	0.0518316	0.857741	em02
FBtr0072169	1.21517	0.150675	em02
FBtr0072172	0.559684	0.17429	em02
FBtr0072174	0.577774	0.195156	em02
FBtr0072177	0.374238	0.255658	em02
FBtr0072185	0.0923483	0.801347	em02
FBtr0072187	0.942378	4.89378e-05	em02
FBtr0072188	0.180932	0.717121	em02
FBtr0072190	0.278583	0.398721	em02
FBtr0072192	-0.607351	0.000765294	em02
FBtr0072194	0.0549949	0.91539	em02
FBtr0072195	1.17472	0.00530298	em02
FBtr0072202	0.2204	0.585616	em02
FBtr0072204	-0.77005	5.86725e-09	em02
FBtr0072205	1.28894	4.1446e-11	em02
FBtr0072207	-0.839475	0.00451324	em02
FBtr0072208	0.381445	0.110557	em02
FBtr0072210	-0.438769	0.00634403	em02
FBtr0072211	-0.0424558	0.934256	em02
FBtr0072219	1.03461	0.0576652	em02
FBtr0072220	-0.961301	0.000230399	em02
FBtr0072221	-0.278145	0.12797	em02
FBtr0072223	-2.18971	7.35373e-26	em02
FBtr0072225	-0.475127	0.00237477	em02
FBtr0072226	-0.393148	0.0871206	em02
FBtr0072227	-1.35548	5.74293e-09	em02
FBtr0072233	0.806584	3.6346e-05	em02
FBtr0072234	-0.904253	1.55978e-08	em02
FBtr0072235	-0.250647	0.154431	em02
FBtr0072236	-0.812019	4.22022e-05	em02
FBtr0072241	0.0280583	0.953099	em02
FBtr0072242	-0.401613	0.0870755	em02
FBtr0072249	-0.183635	0.52348	em02
FBtr0072250	-0.446659	0.0349888	em02
FBtr0072251	2.0889	0.120689	em02
FBtr0072253	2.17801	2.43952e-06	em02
FBtr0072255	1.34487	0.356215	em02
FBtr0072256	0.677505	4.16144e-06	em02
FBtr0072257	1.66922	0.154018	em02
FBtr0072258	0.687291	0.182963	em02
FBtr0072260	-1.01744	1.15264e-11	em02
FBtr0072261	-1.22786	2.40071e-06	em02
FBtr0072262	0.941423	2.85382e-08	em02
FBtr0072268	-0.493749	0.0494796	em02
FBtr0072270	3.64063	3.27282e-57	em02
FBtr0072271	-1.19002	5.01838e-06	em02
FBtr0072277	-0.795721	0.000194865	em02
FBtr0072280	0.156993	0.478439	em02
FBtr0072281	-1.36189	1.22152e-23	em02
FBtr0072285	0.449819	0.0088876	em02
FBtr0072287	-0.594514	4.29035e-05	em02
FBtr0072302	1.81821	1.26079e-16	em02
FBtr0072303	-0.912016	0.000404518	em02
FBtr0072307	-0.493181	0.00367237	em02
FBtr0072308	1.15966	2.58103e-12	em02
FBtr0072309	-1.8947	1.2264e-30	em02
FBtr0072312	3.9817	9.92789e-07	em02
FBtr0072315	-1.00344	0.000152747	em02
FBtr0072317	-0.259705	0.58807	em02
FBtr0072320	-1.10037	5.59796e-05	em02
FBtr0072323	-0.490076	0.0548881	em02
FBtr0072324	-0.167553	0.45756	em02
FBtr0072327	0.261669	0.102007	em02
FBtr0072332	0.602205	0.000894448	em02
FBtr0072333	9.31012	9.37141e-05	em02
FBtr0072335	4.3991	0.00104325	em02
FBtr0072338	-0.314048	0.0631092	em02
FBtr0072339	-0.680724	0.00150168	em02
FBtr0072342	-0.28974	0.045684	em02
FBtr0072343	-0.0384883	0.926815	em02
FBtr0072344	-0.0701297	0.857407	em02
FBtr0072347	0.611294	0.000178203	em02
FBtr0072364	-0.837944	7.00911e-05	em02
FBtr0072369	-0.409427	0.0365481	em02
FBtr0072370	4.51586	1.59129e-15	em02
FBtr0072374	-0.20994	0.457825	em02
FBtr0072375	1.78535	2.81683e-13	em02
FBtr0072392	-0.496206	0.00246283	em02
FBtr0072393	-1.56146	0.000918127	em02
FBtr0072395	-0.314573	0.299916	em02
FBtr0072396	3.79602	9.87649e-13	em02
FBtr0072397	-0.664697	0.000720943	em02
FBtr0072399	0.88456	0.09575	em02
FBtr0072401	3.78836	2.64363e-05	em02
FBtr0072405	0.0166835	0.985003	em02
FBtr0072409	-2.17955	5.48606e-39	em02
FBtr0072410	1.31239	0.312515	em02
FBtr0072411	-2.84304	2.86982e-47	em02
FBtr0072412	0.29795	0.336571	em02
FBtr0072423	0.106454	0.677652	em02
FBtr0072425	0.555192	0.00875563	em02
FBtr0072426	3.24478	0.211693	em02
FBtr0072427	-1.38307	0.0133811	em02
FBtr0072429	-1.14712	1.72486e-05	em02
FBtr0072435	0.636958	0.000527467	em02
FBtr0072436	1.984	1.03358e-14	em02
FBtr0072437	0.741824	0.0210223	em02
FBtr0072444	3.79211	1.23061e-20	em02
FBtr0072449	2.48659	5.5818e-25	em02
FBtr0072455	-1.39902	0.904552	em02
FBtr0072463	5.10658	5.84328e-11	em02
FBtr0072464	-0.204145	0.53092	em02
FBtr0072477	0.380761	0.0101116	em02
FBtr0072480	-0.281663	0.091095	em02
FBtr0072483	-0.365769	0.0786107	em02
FBtr0072484	-0.860161	0.00176935	em02
FBtr0072486	-1.02413	6.17036e-12	em02
FBtr0072499	-0.213003	0.316481	em02
FBtr0072501	1.62326	0.18876	em02
FBtr0072503	-0.0914451	0.729622	em02
FBtr0072504	3.02796	0.000237879	em02
FBtr0072515	0.262618	0.285726	em02
FBtr0072519	-0.388577	0.375043	em02
FBtr0072520	0.350979	0.179614	em02
FBtr0072524	-1.85185	1.28737e-08	em02
FBtr0072526	-0.402836	0.189532	em02
FBtr0072529	-0.857531	0.00019007	em02
FBtr0072532	-0.415241	0.0379716	em02
FBtr0072534	4.44108	7.27983e-13	em02
FBtr0072537	-0.898762	5.31788e-06	em02
FBtr0072541	-0.0772084	0.989247	em02
FBtr0072548	0.397335	0.612934	em02
FBtr0072550	0.516301	0.406422	em02
FBtr0072551	-1.04851	3.73682e-16	em02
FBtr0072553	3.79827	0.293098	em02
FBtr0072556	-0.267861	0.456675	em02
FBtr0072557	0.784748	0.00148514	em02
FBtr0072558	0.29344	0.3476	em02
FBtr0072559	0.0626929	0.864664	em02
FBtr0072561	3.45553	0.0086107	em02
FBtr0072562	1.43961	0.253721	em02
FBtr0072563	3.5443	6.16518e-07	em02
FBtr0072564	-1.11806	3.22412e-08	em02
FBtr0072569	-0.693606	0.00387712	em02
FBtr0072573	1.75762	0.0680252	em02
FBtr0072574	5.02553	2.48586e-05	em02
FBtr0072576	0.0692446	0.826325	em02
FBtr0072578	0.744413	9.94787e-07	em02
FBtr0072583	-0.696162	1.71005e-05	em02
FBtr0072585	-2.18633	0.480597	em02
FBtr0072587	-4.39203	2.59846e-34	em02
FBtr0072589	-0.926672	0.0035618	em02
FBtr0072592	3.36173	1.45776e-12	em02
FBtr0072593	-0.12769	0.810699	em02
FBtr0072596	-1.29286	1.44256e-07	em02
FBtr0072597	0.352695	0.281731	em02
FBtr0072601	-0.821331	5.53536e-06	em02
FBtr0072602	-0.422052	0.325997	em02
FBtr0072604	-2.79078	0.230459	em02
FBtr0072606	3.02457	1.89901e-08	em02
FBtr0072607	-0.375609	0.0943739	em02
FBtr0072609	1.91592	0.313849	em02
FBtr0072610	-0.356679	0.0737163	em02
FBtr0072611	0.860483	0.0513734	em02
FBtr0072621	-1.25234	3.39327e-12	em02
FBtr0072625	3.24772	0.000279188	em02
FBtr0072630	4.95025	0.219685	em02
FBtr0072634	3.36533	0.59539	em02
FBtr0072635	1.46632	0.00921901	em02
FBtr0072639	3.02798	1.07316e-14	em02
FBtr0072644	-0.129893	0.585162	em02
FBtr0072651	2.14597	0.241336	em02
FBtr0072652	-0.585928	0.000302806	em02
FBtr0072663	0.432509	0.0512521	em02
FBtr0072667	0.846246	2.03295e-07	em02
FBtr0072668	0.745088	1.073e-05	em02
FBtr0072674	-1.07446	0.00147179	em02
FBtr0072678	0.149859	0.667671	em02
FBtr0072679	0.220042	0.715047	em02
FBtr0072680	0.423436	0.267616	em02
FBtr0072681	1.40834	0.806588	em02
FBtr0072694	2.90802	3.89124e-10	em02
FBtr0072699	0.0064204	0.989182	em02
FBtr0072703	-0.20095	0.250737	em02
FBtr0072706	-0.501315	0.0716133	em02
FBtr0072709	-0.516216	0.0190801	em02
FBtr0072711	-0.504619	0.0319285	em02
FBtr0072712	-0.567863	0.536461	em02
FBtr0072718	-0.431064	0.174175	em02
FBtr0072721	0.147064	0.594708	em02
FBtr0072723	1.04541	2.92427e-08	em02
FBtr0072724	-0.344155	0.166398	em02
FBtr0072725	5.76836	3.36344e-81	em02
FBtr0072727	-0.424809	0.0349895	em02
FBtr0072729	-0.0797645	0.688069	em02
FBtr0072730	-0.229573	0.282695	em02
FBtr0072731	0.269828	0.220646	em02
FBtr0072732	0.0369684	0.955681	em02
FBtr0072733	-0.129649	0.784284	em02
FBtr0072735	0.462701	0.337933	em02
FBtr0072738	-0.412008	0.00526026	em02
FBtr0072742	2.53165	0.451414	em02
FBtr0072743	-0.56217	0.0773812	em02
FBtr0072747	0.00541317	0.989781	em02
FBtr0072754	-0.462407	0.0367354	em02
FBtr0072757	-1.34746	3.01347e-08	em02
FBtr0072759	0.35167	0.626404	em02
FBtr0072760	-0.597266	0.0269047	em02
FBtr0072761	4.12941	2.29542e-10	em02
FBtr0072763	-0.449205	0.143989	em02
FBtr0072764	4.6754	9.02848e-57	em02
FBtr0072767	-0.962515	4.25274e-11	em02
FBtr0072773	0.215202	0.395328	em02
FBtr0072774	-1.39072	1.54383e-20	em02
FBtr0072775	1.52764	3.44801e-23	em02
FBtr0072776	2.1659	3.16938e-36	em02
FBtr0072777	-0.0854861	0.715006	em02
FBtr0072779	-0.184273	0.584139	em02
FBtr0072784	1.49396	0.506352	em02
FBtr0072786	-0.0365325	0.992475	em02
FBtr0072788	0.155405	0.640006	em02
FBtr0072790	-0.13663	0.567822	em02
FBtr0072791	-0.453044	0.125804	em02
FBtr0072792	0.230925	0.650769	em02
FBtr0072795	2.8838	0.00499301	em02
FBtr0072797	1.39713	0.0830417	em02
FBtr0072800	2.84894	0.494952	em02
FBtr0072805	-0.118722	0.899698	em02
FBtr0072809	-0.95447	5.17847e-07	em02
FBtr0072810	-0.298961	0.241551	em02
FBtr0072811	-0.643485	0.0012189	em02
FBtr0072814	0.407886	0.069606	em02
FBtr0072822	4.02151	3.81615e-11	em02
FBtr0072823	-0.300686	0.237836	em02
FBtr0072825	0.040932	0.877277	em02
FBtr0072826	1.27166	9.54199e-12	em02
FBtr0072828	-0.371342	0.0353523	em02
FBtr0072831	-0.97766	2.06768e-14	em02
FBtr0072832	-1.27762	4.64344e-06	em02
FBtr0072834	-0.650463	0.00150568	em02
FBtr0072836	3.32641	1.5919e-16	em02
FBtr0072841	-0.693274	0.00128361	em02
FBtr0072842	-0.480511	0.11281	em02
FBtr0072844	-1.5061	1.43355e-16	em02
FBtr0072853	-0.273851	0.629221	em02
FBtr0072856	0.460682	0.00673949	em02
FBtr0072864	-0.440494	0.132184	em02
FBtr0072866	-1.13596	1.55368e-15	em02
FBtr0072867	-0.0812852	0.823755	em02
FBtr0072871	1.33165	2.01639e-10	em02
FBtr0072877	0.198803	0.203465	em02
FBtr0072878	0.442455	0.17027	em02
FBtr0072889	0.568524	0.0272849	em02
FBtr0072890	0.683924	9.29099e-06	em02
FBtr0072899	-0.953127	4.88667e-06	em02
FBtr0072900	0.609737	0.00777628	em02
FBtr0072901	-0.646979	9.41422e-06	em02
FBtr0072903	-0.177721	0.339117	em02
FBtr0072904	0.16464	0.395422	em02
FBtr0072905	-0.126402	0.746961	em02
FBtr0072910	-0.21195	0.264558	em02
FBtr0072913	-1.24112	0.00577709	em02
FBtr0072915	-0.975959	3.44995e-05	em02
FBtr0072916	-2.59639	2.46187e-05	em02
FBtr0072921	-0.452259	0.387106	em02
FBtr0072924	0.0583147	0.955513	em02
FBtr0072926	-0.544134	0.0290276	em02
FBtr0072929	-0.189924	0.844236	em02
FBtr0072930	-1.85161	2.4684e-06	em02
FBtr0072931	0.917187	0.0580881	em02
FBtr0072948	-0.734804	0.0643471	em02
FBtr0072951	2.67132	7.41546e-09	em02
FBtr0072955	0.570217	0.0546741	em02
FBtr0072956	-0.636646	0.00842987	em02
FBtr0072969	-0.0615737	0.904552	em02
FBtr0072970	-0.761858	0.000136808	em02
FBtr0072972	0.676896	4.39685e-07	em02
FBtr0072978	-0.0539794	0.841785	em02
FBtr0072982	-0.793381	0.000380554	em02
FBtr0072984	-0.411484	0.0559732	em02
FBtr0072985	-1.29903	6.37102e-07	em02
FBtr0072987	0.00469989	0.996677	em02
FBtr0072990	-0.539454	0.0145627	em02
FBtr0072991	-4.00565	0.175323	em02
FBtr0073005	1.13511	2.70876e-17	em02
FBtr0073015	0.604267	0.00352092	em02
FBtr0073016	-0.39883	0.0214737	em02
FBtr0073023	-0.202206	0.435785	em02
FBtr0073027	-1.13945	0.00348901	em02
FBtr0073029	-0.608895	0.108566	em02
FBtr0073030	-0.305954	0.965857	em02
FBtr0073033	0.281747	0.325808	em02
FBtr0073034	1.63047	1.00925e-06	em02
FBtr0073035	-0.272308	0.380254	em02
FBtr0073040	-0.880966	0.0910571	em02
FBtr0073042	-1.28164	5.90674e-15	em02
FBtr0073043	0.0481096	0.835986	em02
FBtr0073044	0.454474	0.0152864	em02
FBtr0073046	-1.42754	7.56244e-13	em02
FBtr0073051	3.67705	0.00424446	em02
FBtr0073053	3.58794	1.45175e-13	em02
FBtr0073062	5.05081	0.0394734	em02
FBtr0073063	0.383969	0.357434	em02
FBtr0073068	0.0701427	0.78792	em02
FBtr0073073	-0.61063	0.903494	em02
FBtr0073075	0.297958	0.445861	em02
FBtr0073076	0.586698	0.110175	em02
FBtr0073078	-0.369006	0.0122378	em02
FBtr0073082	-1.18615	1.60341e-11	em02
FBtr0073084	-0.674428	0.000370131	em02
FBtr0073086	3.17073	0.142272	em02
FBtr0073093	-0.726654	2.60149e-05	em02
FBtr0073095	1.2896	0.00258193	em02
FBtr0073106	0.650127	0.0300008	em02
FBtr0073108	0.878069	0.00394008	em02
FBtr0073109	0.220831	0.484761	em02
FBtr0073112	-0.413362	0.106725	em02
FBtr0073113	-0.32019	0.0257408	em02
FBtr0073114	-0.995302	1.70767e-08	em02
FBtr0073118	-0.03035	0.945106	em02
FBtr0073127	-0.221701	0.547938	em02
FBtr0073141	4.16657	3.7999e-50	em02
FBtr0073142	-0.84561	0.00118182	em02
FBtr0073143	-2.20046	2.68841e-45	em02
FBtr0073144	0.132727	0.65909	em02
FBtr0073145	3.38579	3.10907e-15	em02
FBtr0073148	-0.824185	0.000115135	em02
FBtr0073149	-0.113073	0.695363	em02
FBtr0073151	-1.60726	1.67735e-12	em02
FBtr0073154	0.245735	0.979143	em02
FBtr0073159	-0.647374	1.08674e-05	em02
FBtr0073160	1.30605	3.10686e-08	em02
FBtr0073165	4.50333	1.65338e-23	em02
FBtr0073171	0.412167	0.00951011	em02
FBtr0073173	0.31427	0.257842	em02
FBtr0073174	0.762352	0.726548	em02
FBtr0073176	-0.516919	0.00204783	em02
FBtr0073177	0.90324	0.00371649	em02
FBtr0073180	0.123647	0.831105	em02
FBtr0073184	-0.223025	0.660118	em02
FBtr0073185	-0.558959	0.0434761	em02
FBtr0073187	-0.142058	0.461771	em02
FBtr0073192	3.53021	0.0102015	em02
FBtr0073193	-0.726951	0.00591009	em02
FBtr0073202	-0.106015	0.641829	em02
FBtr0073204	3.63551	0.0173423	em02
FBtr0073205	2.78303	4.94317e-14	em02
FBtr0073209	-0.265526	0.282103	em02
FBtr0073211	1.20382	1.1763e-09	em02
FBtr0073212	-1.03031	2.61853e-08	em02
FBtr0073217	0.379794	0.337367	em02
FBtr0073225	-1.37019	1.13605e-11	em02
FBtr0073227	-0.0269565	0.953901	em02
FBtr0073228	0.574849	0.156028	em02
FBtr0073229	0.364097	0.0829693	em02
FBtr0073231	4.12019	2.78511e-21	em02
FBtr0073232	0.192973	0.580495	em02
FBtr0073233	0.518576	0.00296729	em02
FBtr0073234	-0.00755944	0.986921	em02
FBtr0073235	-0.0446578	0.905198	em02
FBtr0073242	1.01616	6.53942e-10	em02
FBtr0073243	-0.0282923	0.946508	em02
FBtr0073244	0.204018	0.561168	em02
FBtr0073245	-0.172686	0.68927	em02
FBtr0073250	3.08536	3.46291e-21	em02
FBtr0073256	1.20414	9.41779e-06	em02
FBtr0073260	2.58674	1.15212e-22	em02
FBtr0073263	-0.47103	0.000662282	em02
FBtr0073264	-1.17367	6.37278e-16	em02
FBtr0073270	-0.505002	0.0964515	em02
FBtr0073271	-0.966938	0.000450388	em02
FBtr0073278	4.73032	5.39581e-25	em02
FBtr0073283	2.38747	0.232118	em02
FBtr0073286	0.892874	3.15214e-08	em02
FBtr0073287	0.255271	0.108759	em02
FBtr0073288	-0.253068	0.383163	em02
FBtr0073291	4.67651	1.32269e-07	em02
FBtr0073299	2.95857	0.00381458	em02
FBtr0073310	-0.0630498	0.773496	em02
FBtr0073317	-0.103484	0.837843	em02
FBtr0073319	-0.137396	0.918538	em02
FBtr0073335	0.678068	0.000102782	em02
FBtr0073338	-0.0157135	0.979161	em02
FBtr0073340	-0.0357589	0.927259	em02
FBtr0073341	2.98312	0.00707255	em02
FBtr0073345	-0.670567	0.0903948	em02
FBtr0073346	-0.213917	0.64728	em02
FBtr0073347	-0.714563	0.124962	em02
FBtr0073348	-1.25999	7.9128e-18	em02
FBtr0073353	3.77956	0.00559145	em02
FBtr0073364	-1.35308	0.0030119	em02
FBtr0073365	-0.375494	0.270424	em02
FBtr0073375	3.60382	8.69116e-07	em02
FBtr0073376	4.17167	0.000152558	em02
FBtr0073377	0.185837	0.982548	em02
FBtr0073379	-0.0967656	0.798348	em02
FBtr0073380	-2.86969	1.40613e-17	em02
FBtr0073381	-0.65323	9.58198e-05	em02
FBtr0073387	2.39432	7.11014e-11	em02
FBtr0073390	2.42872	0.273312	em02
FBtr0073400	4.88385	7.45459e-05	em02
FBtr0073403	-0.758746	9.23459e-07	em02
FBtr0073409	0.520052	0.129754	em02
FBtr0073410	-1.85062	1.45534e-14	em02
FBtr0073411	-0.0305903	0.968079	em02
FBtr0073422	0.316464	0.495189	em02
FBtr0073425	1.83708	0.0389019	em02
FBtr0073428	-1.07357	1.75844e-06	em02
FBtr0073429	-0.730087	6.341e-05	em02
FBtr0073434	-1.2844	0.000120804	em02
FBtr0073436	-0.572742	0.0388388	em02
FBtr0073440	0.360155	0.195096	em02
FBtr0073441	-0.736573	8.02782e-06	em02
FBtr0073448	-1.15658	4.69617e-09	em02
FBtr0073450	3.19618	0.0015993	em02
FBtr0073451	0.892279	0.000446081	em02
FBtr0073452	-0.79233	0.00191078	em02
FBtr0073453	-1.13527	5.09676e-07	em02
FBtr0073454	-0.862234	1.13483e-05	em02
FBtr0073456	1.57532	0.394774	em02
FBtr0073457	-0.868321	3.2954e-05	em02
FBtr0073460	0.827306	0.00758418	em02
FBtr0073461	1.53437	5.72184e-08	em02
FBtr0073470	0.856839	0.525364	em02
FBtr0073471	-0.276215	0.539539	em02
FBtr0073475	-1.17472	5.75793e-05	em02
FBtr0073480	-0.34747	0.141073	em02
FBtr0073481	-0.734984	4.12489e-05	em02
FBtr0073482	-0.82744	5.06622e-06	em02
FBtr0073499	0.163746	0.558413	em02
FBtr0073505	0.0997642	0.60253	em02
FBtr0073506	-0.229993	0.470996	em02
FBtr0073509	-5.08085	0.00819272	em02
FBtr0073510	0.0403887	0.942263	em02
FBtr0073512	-0.193013	0.334438	em02
FBtr0073513	-0.0843138	0.912419	em02
FBtr0073516	-0.266042	0.475552	em02
FBtr0073518	-1.53033	2.23179e-13	em02
FBtr0073520	-0.366981	0.0535183	em02
FBtr0073521	0.0802763	0.9021	em02
FBtr0073533	-0.106772	0.741532	em02
FBtr0073535	0.0505444	0.919466	em02
FBtr0073536	0.22398	0.516802	em02
FBtr0073540	-0.200195	0.603853	em02
FBtr0073541	-1.1463	4.83301e-06	em02
FBtr0073542	-0.61714	0.0429637	em02
FBtr0073547	-1.47601	0.00401505	em02
FBtr0073551	-0.633871	0.00144743	em02
FBtr0073552	-0.711425	0.000126394	em02
FBtr0073555	1.86031	1.36643e-07	em02
FBtr0073562	0.890335	9.68494e-10	em02
FBtr0073569	-0.218066	0.859552	em02
FBtr0073570	0.562558	0.29059	em02
FBtr0073571	0.499123	0.128947	em02
FBtr0073572	0.0465756	0.935852	em02
FBtr0073573	-1.03067	0.0159816	em02
FBtr0073574	2.80149	1.71488e-07	em02
FBtr0073578	-0.706418	0.0231091	em02
FBtr0073579	1.42408	0.00444458	em02
FBtr0073580	3.14005	0.000834879	em02
FBtr0073582	-0.632155	0.0610739	em02
FBtr0073594	1.8301	0.00164585	em02
FBtr0073596	-0.353976	0.0137944	em02
FBtr0073600	0.287975	0.440503	em02
FBtr0073601	-0.325802	0.348189	em02
FBtr0073602	0.946331	5.47697e-08	em02
FBtr0073604	0.97743	1.63924e-10	em02
FBtr0073607	-0.893154	1.82846e-05	em02
FBtr0073608	-0.701578	0.0941266	em02
FBtr0073612	3.50386	0.0021512	em02
FBtr0073613	2.74062	0.0731009	em02
FBtr0073620	-0.283659	0.424953	em02
FBtr0073621	0.451151	0.00101069	em02
FBtr0073622	-0.418711	0.0548881	em02
FBtr0073637	-1.05367	3.65623e-05	em02
FBtr0073640	1.5952	0.442542	em02
FBtr0073641	-0.518669	0.126816	em02
FBtr0073642	0.451874	0.0141236	em02
FBtr0073652	-0.226825	0.390635	em02
FBtr0073655	1.63587	4.73704e-05	em02
FBtr0073657	0.216584	0.768742	em02
FBtr0073658	-1.14696	2.65322e-07	em02
FBtr0073660	-1.46933	2.35335e-11	em02
FBtr0073667	-2.59549	0.000709868	em02
FBtr0073669	-1.40654	2.53844e-09	em02
FBtr0073670	-1.50593	0.746396	em02
FBtr0073675	-1.94703	1.89901e-08	em02
FBtr0073678	-0.921514	1.43673e-06	em02
FBtr0073680	-0.280557	0.450508	em02
FBtr0073683	-0.747447	0.00530903	em02
FBtr0073687	-0.701439	0.000282766	em02
FBtr0073688	-0.182315	0.543642	em02
FBtr0073691	-0.5969	0.0311568	em02
FBtr0073692	0.896574	5.52752e-07	em02
FBtr0073693	-0.796891	2.04476e-09	em02
FBtr0073694	1.30766	0.000548162	em02
FBtr0073695	-3.09962	4.89979e-23	em02
FBtr0073697	-0.0923521	0.73081	em02
FBtr0073704	0.211009	0.46181	em02
FBtr0073705	0.100585	0.796342	em02
FBtr0073709	-1.10537	2.17878e-06	em02
FBtr0073712	3.84857	1.31772e-20	em02
FBtr0073720	-0.201478	0.57341	em02
FBtr0073721	-1.73576	1.61065e-14	em02
FBtr0073723	-1.8482	0.0263972	em02
FBtr0073724	-1.23342	0.0363942	em02
FBtr0073726	0.0524367	0.842638	em02
FBtr0073727	0.518505	0.156968	em02
FBtr0073728	4.56604	0.276805	em02
FBtr0073729	4.55985	0.277648	em02
FBtr0073730	-1.5458	1.39954e-19	em02
FBtr0073734	2.7708	0.703033	em02
FBtr0073737	-1.02769	0.000195026	em02
FBtr0073741	0.107194	0.759419	em02
FBtr0073747	-0.533996	0.000232756	em02
FBtr0073754	-0.987107	2.36846e-10	em02
FBtr0073755	-0.190952	0.525553	em02
FBtr0073756	-0.220291	0.275316	em02
FBtr0073757	-0.362681	0.070097	em02
FBtr0073763	-0.416411	0.222411	em02
FBtr0073766	-0.36241	0.181209	em02
FBtr0073769	-0.67762	0.0313925	em02
FBtr0073775	0.24769	0.610992	em02
FBtr0073776	-1.34647	9.92179e-05	em02
FBtr0073777	2.82168	9.48574e-10	em02
FBtr0073778	3.95479	9.69979e-21	em02
FBtr0073779	0.25261	0.370888	em02
FBtr0073789	-0.820114	0.00486261	em02
FBtr0073792	0.364189	0.373308	em02
FBtr0073796	-0.515899	0.11777	em02
FBtr0073805	-2.59153	1.06268e-16	em02
FBtr0073806	1.60959	3.21552e-07	em02
FBtr0073809	-1.95594	1.62744e-31	em02
FBtr0073812	0.758865	0.696358	em02
FBtr0073817	-1.10445	3.05939e-11	em02
FBtr0073818	-0.668808	0.0041096	em02
FBtr0073819	-0.24784	0.166162	em02
FBtr0073820	1.07444	1.6425e-13	em02
FBtr0073821	-1.24716	0.639531	em02
FBtr0073827	-0.841692	0.0988387	em02
FBtr0073828	-0.54984	0.0192947	em02
FBtr0073834	0.109197	0.631557	em02
FBtr0073835	-0.193466	0.220319	em02
FBtr0073838	-0.0541991	0.894852	em02
FBtr0073839	-0.98122	0.00313084	em02
FBtr0073840	-0.474237	0.194125	em02
FBtr0073841	-0.548369	0.000101282	em02
FBtr0073842	-1.05998	2.80811e-07	em02
FBtr0073843	-1.7734	2.3193e-21	em02
FBtr0073844	-0.274792	0.0813621	em02
FBtr0073846	0.90635	0.00592765	em02
FBtr0073847	-0.521935	0.217832	em02
FBtr0073848	0.256662	0.407956	em02
FBtr0073849	-0.592762	9.53043e-05	em02
FBtr0073850	-0.707158	6.08697e-07	em02
FBtr0073855	-0.643056	0.0274985	em02
FBtr0073891	2.30823	0.182126	em02
FBtr0073898	-1.51544	0.000276152	em02
FBtr0073899	0.0938463	0.808135	em02
FBtr0073900	-1.07108	6.01387e-15	em02
FBtr0073902	-0.0974581	0.746961	em02
FBtr0073903	-1.12718	4.06014e-10	em02
FBtr0073904	3.7301	0.131505	em02
FBtr0073922	-0.236471	0.284669	em02
FBtr0073923	-0.086039	0.816966	em02
FBtr0073926	-1.35787	0.000239828	em02
FBtr0073928	2.18576	0.682131	em02
FBtr0073933	-1.18481	0.00122952	em02
FBtr0073939	4.79642	7.92803e-07	em02
FBtr0073942	2.90666	5.83081e-18	em02
FBtr0073945	-1.20134	1.98084e-06	em02
FBtr0073946	0.0261297	0.965641	em02
FBtr0073948	1.04212	0.27301	em02
FBtr0073957	-0.00228004	0.994204	em02
FBtr0073958	-1.34367	1.60039e-14	em02
FBtr0073960	0.027518	0.942559	em02
FBtr0073961	-0.537171	0.000204919	em02
FBtr0073964	-0.060541	0.877585	em02
FBtr0073965	-0.790284	0.0233259	em02
FBtr0073966	-0.717312	0.150622	em02
FBtr0073967	-0.497093	0.231923	em02
FBtr0073968	-1.55842	2.65844e-11	em02
FBtr0073970	2.74171	9.56091e-09	em02
FBtr0073972	-0.622585	0.00782747	em02
FBtr0073974	-0.0585467	0.942263	em02
FBtr0073978	1.44794	0.125432	em02
FBtr0073979	3.19674	4.16612e-07	em02
FBtr0073988	0.451426	0.286457	em02
FBtr0073989	-0.581096	0.000745104	em02
FBtr0073992	-1.03469	0.000575317	em02
FBtr0074001	-0.607369	0.000241428	em02
FBtr0074005	-0.287064	0.501655	em02
FBtr0074007	-0.532004	0.0926345	em02
FBtr0074011	-0.586013	0.00128222	em02
FBtr0074018	-0.244061	0.291302	em02
FBtr0074019	0.45618	0.0195943	em02
FBtr0074020	1.42501	3.77041e-09	em02
FBtr0074027	-0.412091	0.22698	em02
FBtr0074030	-0.147716	0.535547	em02
FBtr0074031	-1.99581	1.06351e-25	em02
FBtr0074032	-1.68637	4.73119e-05	em02
FBtr0074034	-1.0508	0.00184753	em02
FBtr0074036	1.18402	0.20569	em02
FBtr0074039	-1.32263	2.39256e-17	em02
FBtr0074042	-0.406716	0.0390877	em02
FBtr0074045	0.359282	0.40395	em02
FBtr0074046	-0.871105	1.25983e-07	em02
FBtr0074047	0.409316	0.0172785	em02
FBtr0074052	6.32305	9.28518e-08	em02
FBtr0074053	0.100262	0.840467	em02
FBtr0074054	-1.35909	0.000113311	em02
FBtr0074055	2.04199	6.76148e-17	em02
FBtr0074056	-0.164714	0.672201	em02
FBtr0074058	-0.422112	0.0122946	em02
FBtr0074060	-2.02138	2.72346e-11	em02
FBtr0074063	2.35989	4.0651e-29	em02
FBtr0074064	4.56609	6.7372e-06	em02
FBtr0074066	0.0461541	0.908555	em02
FBtr0074071	0.413113	0.00501397	em02
FBtr0074072	-1.10432	0.165992	em02
FBtr0074074	1.37944	1.72805e-08	em02
FBtr0074075	2.32253	9.15157e-27	em02
FBtr0074076	0.598746	0.726163	em02
FBtr0074077	-0.837905	3.31177e-07	em02
FBtr0074079	-0.387002	0.109769	em02
FBtr0074083	1.07509	0.0881795	em02
FBtr0074085	-0.295299	0.474488	em02
FBtr0074086	-0.500061	0.0950053	em02
FBtr0074087	-0.585755	0.00161387	em02
FBtr0074090	0.173053	0.317101	em02
FBtr0074094	-0.708945	2.09583e-07	em02
FBtr0074095	3.1355	7.07562e-11	em02
FBtr0074097	-0.784605	0.00931431	em02
FBtr0074104	0.376837	0.0473211	em02
FBtr0074105	0.865032	0.0175501	em02
FBtr0074106	-0.370174	0.234308	em02
FBtr0074112	-0.0600176	0.933751	em02
FBtr0074114	-1.1008	7.66859e-12	em02
FBtr0074117	0.726394	0.143139	em02
FBtr0074130	-0.214995	0.277956	em02
FBtr0074132	-0.724318	0.0975438	em02
FBtr0074134	-0.0813954	0.904375	em02
FBtr0074135	-0.722266	0.0459644	em02
FBtr0074138	0.188473	0.433782	em02
FBtr0074140	-1.2157	1.15845e-15	em02
FBtr0074144	-0.670527	0.0145535	em02
FBtr0074151	-0.832773	5.102e-10	em02
FBtr0074153	0.890606	0.4328	em02
FBtr0074159	-0.511477	0.0654421	em02
FBtr0074166	0.164072	0.569539	em02
FBtr0074167	-1.2682	1.32244e-13	em02
FBtr0074168	-0.209683	0.60522	em02
FBtr0074169	0.0274771	0.927051	em02
FBtr0074174	-0.0712567	0.815929	em02
FBtr0074176	-0.370939	0.238995	em02
FBtr0074178	0.978237	9.61597e-14	em02
FBtr0074179	0.22626	0.63154	em02
FBtr0074183	1.10352	4.38347e-06	em02
FBtr0074184	0.16001	0.607066	em02
FBtr0074185	-0.793956	0.000381146	em02
FBtr0074190	-0.0517747	0.914332	em02
FBtr0074201	-1.07868	2.68829e-10	em02
FBtr0074202	-0.138794	0.63482	em02
FBtr0074203	-0.783797	1.04833e-05	em02
FBtr0074209	-0.558332	0.0199193	em02
FBtr0074210	-1.46157	7.83397e-11	em02
FBtr0074211	0.600912	0.000355191	em02
FBtr0074216	0.237151	0.41533	em02
FBtr0074217	-0.986483	0.000610283	em02
FBtr0074222	-0.353904	0.406208	em02
FBtr0074226	-0.483545	0.13728	em02
FBtr0074230	-0.842497	7.23701e-10	em02
FBtr0074233	0.760569	0.0107295	em02
FBtr0074236	3.09883	0.00142957	em02
FBtr0074237	-0.753217	0.0343444	em02
FBtr0074238	0.123173	0.830048	em02
FBtr0074240	-0.396404	0.35929	em02
FBtr0074241	-0.453069	0.00173094	em02
FBtr0074246	-1.50764	2.57935e-21	em02
FBtr0074250	2.74517	2.43936e-09	em02
FBtr0074251	4.14979	1.88599e-08	em02
FBtr0074255	-2.14263	3.54785e-34	em02
FBtr0074257	-1.46399	3.22007e-24	em02
FBtr0074261	-0.506912	0.0958679	em02
FBtr0074268	0.649754	0.217694	em02
FBtr0074271	3.01767	6.9602e-31	em02
FBtr0074278	-1.16207	2.05345e-12	em02
FBtr0074282	-0.63462	0.142869	em02
FBtr0074283	-1.37274	7.54826e-12	em02
FBtr0074285	-0.349285	0.169151	em02
FBtr0074286	-1.29932	1.21064e-12	em02
FBtr0074287	5.76595	0.0251737	em02
FBtr0074288	4.36123	0.000493011	em02
FBtr0074290	-0.318105	0.102575	em02
FBtr0074292	-1.1862	0.000340245	em02
FBtr0074294	-0.918281	4.2949e-05	em02
FBtr0074296	0.457674	0.156968	em02
FBtr0074300	-0.763733	7.78786e-06	em02
FBtr0074301	1.37175	0.211699	em02
FBtr0074303	-0.97964	2.96773e-05	em02
FBtr0074305	-0.176232	0.472795	em02
FBtr0074307	-0.0441127	0.855964	em02
FBtr0074311	0.228732	0.693579	em02
FBtr0074314	-1.24075	4.05776e-13	em02
FBtr0074318	6.05616	3.17146e-05	em02
FBtr0074330	-0.543473	0.0260518	em02
FBtr0074331	-1.18243	7.24922e-14	em02
FBtr0074332	-0.891787	1.25381e-10	em02
FBtr0074333	-0.109756	0.744995	em02
FBtr0074334	0.387519	0.640628	em02
FBtr0074335	-2.97923	0.358815	em02
FBtr0074336	3.81518	5.71334e-19	em02
FBtr0074339	-0.50721	0.155022	em02
FBtr0074341	-1.40123	1.14777e-06	em02
FBtr0074342	0.321132	0.390304	em02
FBtr0074347	0.260727	0.334286	em02
FBtr0074348	-1.86842	3.8281e-26	em02
FBtr0074352	1.41947	1.01896e-14	em02
FBtr0074354	-0.675476	1.3464e-05	em02
FBtr0074355	1.47988	1.3667e-22	em02
FBtr0074356	3.01502	5.82834e-24	em02
FBtr0074357	3.2021	4.53533e-11	em02
FBtr0074359	-0.094788	0.811536	em02
FBtr0074365	-1.88778	2.27947e-10	em02
FBtr0074372	-1.1854	1.1326e-10	em02
FBtr0074376	-1.47205	5.81186e-14	em02
FBtr0074377	-0.192052	0.438748	em02
FBtr0074381	1.11654	8.53522e-13	em02
FBtr0074383	-0.345387	0.687368	em02
FBtr0074386	-0.800579	0.000124956	em02
FBtr0074387	-0.657009	6.20543e-07	em02
FBtr0074393	1.4884	0.474557	em02
FBtr0074404	-1.14202	1.14996e-10	em02
FBtr0074405	-0.293857	0.899701	em02
FBtr0074406	0.545135	0.135233	em02
FBtr0074410	3.8963	0.0220765	em02
FBtr0074411	1.39531	0.590238	em02
FBtr0074415	-0.620674	0.00579292	em02
FBtr0074416	-0.547231	0.164797	em02
FBtr0074417	-0.581991	0.00151985	em02
FBtr0074418	-0.857384	7.72777e-07	em02
FBtr0074425	-0.573883	3.11692e-05	em02
FBtr0074429	2.15414	0.0859919	em02
FBtr0074431	-0.423039	0.232641	em02
FBtr0074440	-0.39176	0.0759226	em02
FBtr0074443	0.882298	2.23858e-05	em02
FBtr0074446	1.4518	4.21948e-22	em02
FBtr0074447	-3.95687	0.000265662	em02
FBtr0074452	-0.935891	1.23685e-05	em02
FBtr0074453	-0.137703	0.546898	em02
FBtr0074455	0.315503	0.0882302	em02
FBtr0074462	-0.0731504	0.844367	em02
FBtr0074463	-1.03686	1.84479e-10	em02
FBtr0074464	-2.16859	4.65049e-07	em02
FBtr0074465	-0.619236	0.000233096	em02
FBtr0074467	-0.772616	0.410488	em02
FBtr0074468	-2.24025	1.80851e-29	em02
FBtr0074472	0.481176	0.000470622	em02
FBtr0074474	0.621954	0.75587	em02
FBtr0074475	-0.562637	0.0473211	em02
FBtr0074476	-0.0150666	0.972977	em02
FBtr0074480	-1.31877	4.3609e-21	em02
FBtr0074484	0.0228468	0.929232	em02
FBtr0074485	0.569623	0.184566	em02
FBtr0074486	0.591011	0.0384321	em02
FBtr0074487	1.26015	2.8586e-08	em02
FBtr0074492	2.0427	3.34564e-06	em02
FBtr0074493	-0.0242572	0.93287	em02
FBtr0074504	0.774564	3.52448e-08	em02
FBtr0074511	-0.870678	0.000273023	em02
FBtr0074514	0.133799	0.554658	em02
FBtr0074527	-0.508137	0.000509921	em02
FBtr0074530	-0.616361	4.95235e-05	em02
FBtr0074540	-2.98373	2.13109e-24	em02
FBtr0074544	-0.910838	0.000209555	em02
FBtr0074549	4.57221	8.3389e-09	em02
FBtr0074555	-0.769137	0.0131538	em02
FBtr0074558	-0.772624	0.000434652	em02
FBtr0074559	1.2156	0.521856	em02
FBtr0074576	-1.22113	2.30311e-14	em02
FBtr0074577	-1.05888	6.37071e-07	em02
FBtr0074581	0.283997	0.72007	em02
FBtr0074592	3.61306	9.71218e-20	em02
FBtr0074596	1.47834	1.09399e-16	em02
FBtr0074601	-0.812094	1.1009e-06	em02
FBtr0074602	-0.259171	0.260008	em02
FBtr0074603	1.4207	0.00583069	em02
FBtr0074609	2.6965	0.0010509	em02
FBtr0074612	-1.78986	5.62671e-37	em02
FBtr0074614	-1.10018	2.1498e-12	em02
FBtr0074615	-0.0104649	0.974141	em02
FBtr0074616	0.401235	0.516504	em02
FBtr0074617	3.45463	0.0001714	em02
FBtr0074622	-0.464693	0.600241	em02
FBtr0074623	0.21292	0.584567	em02
FBtr0074624	-0.775595	1.04412e-05	em02
FBtr0074628	1.60083	0.696232	em02
FBtr0074631	5.19061	1.66939e-20	em02
FBtr0074634	-1.42337	4.03774e-27	em02
FBtr0074635	-0.424176	0.134156	em02
FBtr0074639	-1.56766	2.52426e-09	em02
FBtr0074640	-0.533911	0.0239712	em02
FBtr0074643	-0.582117	9.3697e-06	em02
FBtr0074644	1.06031	0.874591	em02
FBtr0074647	-0.287948	0.0944716	em02
FBtr0074652	-0.971696	6.08759e-11	em02
FBtr0074653	-1.36209	4.87982e-05	em02
FBtr0074654	-1.5682	0.000206976	em02
FBtr0074655	0.40935	0.142042	em02
FBtr0074656	2.30601	1.68836e-25	em02
FBtr0074660	0.812672	1.14661e-07	em02
FBtr0074661	0.521114	0.00514126	em02
FBtr0074664	0.600907	0.903724	em02
FBtr0074666	0.339012	0.238703	em02
FBtr0074671	-0.680888	5.93988e-06	em02
FBtr0074675	1.82822	6.39696e-11	em02
FBtr0074682	0.525536	0.000269598	em02
FBtr0074684	-0.0199662	0.969351	em02
FBtr0074686	-1.49069	0.000423254	em02
FBtr0074687	0.667932	0.690024	em02
FBtr0074688	-1.21591	1.52546e-17	em02
FBtr0074689	-0.780499	4.0036e-06	em02
FBtr0074693	0.660835	0.0113101	em02
FBtr0074695	1.84883	0.558283	em02
FBtr0074696	-4.46235	0.0295392	em02
FBtr0074697	-0.625656	0.00881668	em02
FBtr0074707	-1.47122	1.40517e-26	em02
FBtr0074710	-1.89032	0.484761	em02
FBtr0074711	-0.35966	0.128999	em02
FBtr0074712	-1.29672	3.04961e-10	em02
FBtr0074716	-0.312743	0.641212	em02
FBtr0074721	-0.570594	0.000134131	em02
FBtr0074729	3.09256	0.000788378	em02
FBtr0074731	0.302323	0.592129	em02
FBtr0074734	-0.887802	0.00207778	em02
FBtr0074737	-0.581405	0.134156	em02
FBtr0074740	0.371473	0.216895	em02
FBtr0074741	-3.10073	1.04637e-10	em02
FBtr0074742	-0.0771787	0.990611	em02
FBtr0074743	-0.181917	0.563137	em02
FBtr0074745	-1.34021	4.0122e-10	em02
FBtr0074746	-0.794097	3.28082e-05	em02
FBtr0074747	-0.831559	0.0031923	em02
FBtr0074748	-1.23515	1.56764e-05	em02
FBtr0074750	-1.94614	1.59129e-15	em02
FBtr0074751	0.620112	0.000307411	em02
FBtr0074753	-0.800603	0.00252133	em02
FBtr0074754	-0.443865	0.00383413	em02
FBtr0074756	-0.98577	6.8157e-05	em02
FBtr0074758	-0.157329	0.879755	em02
FBtr0074759	-0.447634	0.0440944	em02
FBtr0074760	-0.804385	7.93138e-07	em02
FBtr0074761	-1.44669	3.51659e-05	em02
FBtr0074767	-0.599867	0.0334411	em02
FBtr0074768	-0.893558	1.11171e-05	em02
FBtr0074771	-0.700849	0.0410267	em02
FBtr0074775	-0.692133	0.00083021	em02
FBtr0074783	-1.45523	6.69756e-05	em02
FBtr0074785	0.105691	0.767198	em02
FBtr0074786	0.0456865	0.94205	em02
FBtr0074787	1.24713	2.9176e-21	em02
FBtr0074789	0.273402	0.249578	em02
FBtr0074793	0.412572	0.00283711	em02
FBtr0074795	0.411923	0.0338827	em02
FBtr0074798	-1.12905	3.52714e-07	em02
FBtr0074800	-0.768552	8.5104e-09	em02
FBtr0074804	-0.705731	0.0354489	em02
FBtr0074807	-1.28298	2.40071e-06	em02
FBtr0074809	-2.03736	1.78606e-43	em02
FBtr0074810	0.0555722	0.874591	em02
FBtr0074812	2.56093	5.06888e-10	em02
FBtr0074813	-0.740208	2.76058e-07	em02
FBtr0074814	-0.233494	0.660118	em02
FBtr0074815	-0.566798	0.00267133	em02
FBtr0074819	-0.507547	0.0175646	em02
FBtr0074820	3.05291	0.0075029	em02
FBtr0074825	-0.46814	0.0151639	em02
FBtr0074828	-0.02151	0.975767	em02
FBtr0074830	-0.085109	0.74702	em02
FBtr0074837	-0.203555	0.574453	em02
FBtr0074839	-0.176264	0.696232	em02
FBtr0074840	-0.0605099	0.806372	em02
FBtr0074845	2.56023	0.221631	em02
FBtr0074846	-0.727821	3.61984e-06	em02
FBtr0074847	0.745978	0.00011	em02
FBtr0074848	4.0248	6.66432e-06	em02
FBtr0074850	-0.482236	0.0560723	em02
FBtr0074864	-1.46111	0.000323314	em02
FBtr0074872	-0.75654	0.000793685	em02
FBtr0074873	-1.24744	1.97646e-08	em02
FBtr0074880	0.183104	0.546261	em02
FBtr0074881	-1.05163	8.20916e-12	em02
FBtr0074882	-0.771506	1.40274e-06	em02
FBtr0074884	-0.780256	5.39422e-10	em02
FBtr0074888	0.716873	0.00130154	em02
FBtr0074891	-0.738643	7.02537e-08	em02
FBtr0074893	-0.603636	0.0546741	em02
FBtr0074894	-0.222179	0.451916	em02
FBtr0074895	-0.89722	1.11302e-05	em02
FBtr0074896	-0.193501	0.643909	em02
FBtr0074900	1.12047	0.0860098	em02
FBtr0074902	-0.560357	0.0102741	em02
FBtr0074903	0.583291	0.00113092	em02
FBtr0074904	0.4203	0.341861	em02
FBtr0074908	-0.579422	0.000568264	em02
FBtr0074913	-0.310186	0.472493	em02
FBtr0074915	-0.729387	5.89402e-05	em02
FBtr0074917	0.21922	0.363399	em02
FBtr0074918	-0.497767	0.016047	em02
FBtr0074920	-0.765458	0.000950976	em02
FBtr0074921	-0.587235	0.0139507	em02
FBtr0074924	-0.629619	0.0249074	em02
FBtr0074925	2.92281	0.01326	em02
FBtr0074927	-1.6959	3.46111e-14	em02
FBtr0074928	-2.34271	3.39421e-19	em02
FBtr0074930	0.824523	0.896449	em02
FBtr0074938	0.0827337	0.77416	em02
FBtr0074940	-0.895743	3.40458e-09	em02
FBtr0074946	-0.551926	0.03589	em02
FBtr0074947	-0.166611	0.652871	em02
FBtr0074948	6.01312	0.0133939	em02
FBtr0074953	4.30525	3.25493e-32	em02
FBtr0074961	5.42733	5.05958e-20	em02
FBtr0074963	-1.55499	2.98706e-15	em02
FBtr0074966	-0.181343	0.365509	em02
FBtr0074971	-1.54501	4.90787e-12	em02
FBtr0074972	0.747381	8.22304e-06	em02
FBtr0074974	0.778072	1.34336e-08	em02
FBtr0074976	2.17074	0.217999	em02
FBtr0074984	1.02252	0.899724	em02
FBtr0074986	0.832651	0.918306	em02
FBtr0074988	-0.65966	0.0233182	em02
FBtr0074989	0.177723	0.639595	em02
FBtr0074991	-0.147308	0.473062	em02
FBtr0074998	0.400501	0.0187353	em02
FBtr0075014	3.09274	0.000813117	em02
FBtr0075017	4.99835	3.21731e-10	em02
FBtr0075018	-0.21589	0.52172	em02
FBtr0075019	-2.0376	7.73507e-39	em02
FBtr0075022	0.360141	0.104254	em02
FBtr0075025	-1.8746	1.51562e-11	em02
FBtr0075032	-0.0768103	0.897847	em02
FBtr0075033	-2.75685	7.62972e-33	em02
FBtr0075034	-0.0552569	0.901658	em02
FBtr0075037	0.425168	0.00490808	em02
FBtr0075039	2.31223	4.13121e-27	em02
FBtr0075041	-0.816751	5.6702e-07	em02
FBtr0075049	-1.18047	1.10049e-17	em02
FBtr0075050	-0.0436721	0.965857	em02
FBtr0075051	0.74433	0.0115113	em02
FBtr0075053	0.332615	0.319378	em02
FBtr0075054	0.231668	0.610851	em02
FBtr0075055	-0.223857	0.512178	em02
FBtr0075056	-0.855579	2.43973e-09	em02
FBtr0075058	0.495797	0.0936596	em02
FBtr0075062	-2.56038	7.54378e-14	em02
FBtr0075063	1.02018	0.000763937	em02
FBtr0075064	-0.0866637	0.794354	em02
FBtr0075066	-0.122608	0.858603	em02
FBtr0075067	0.109497	0.761517	em02
FBtr0075068	1.37382	1.06881e-17	em02
FBtr0075074	-0.520672	0.0274965	em02
FBtr0075075	-1.44269	1.71826e-10	em02
FBtr0075076	0.420114	0.260539	em02
FBtr0075077	1.79819	0.118665	em02
FBtr0075080	1.17835	7.59703e-06	em02
FBtr0075081	0.440223	0.0345691	em02
FBtr0075084	0.299831	0.871931	em02
FBtr0075086	-1.0841	1.36124e-11	em02
FBtr0075088	0.553372	0.000783129	em02
FBtr0075089	-1.22916	0.56879	em02
FBtr0075091	3.99942	0.000724146	em02
FBtr0075092	-0.388715	0.0177313	em02
FBtr0075098	-1.16004	0.000433717	em02
FBtr0075101	-0.326274	0.191952	em02
FBtr0075108	-0.0126837	0.975978	em02
FBtr0075112	-0.974773	5.77649e-07	em02
FBtr0075117	2.00466	0.145532	em02
FBtr0075120	6.50206	8.16502e-08	em02
FBtr0075121	-1.05793	2.76301e-08	em02
FBtr0075122	-0.251215	0.147533	em02
FBtr0075123	-1.63766	2.06166e-06	em02
FBtr0075125	1.26262	0.225019	em02
FBtr0075126	0.674593	0.0824865	em02
FBtr0075130	1.82915	0.256856	em02
FBtr0075133	0.888834	0.0345322	em02
FBtr0075135	0.553589	0.552159	em02
FBtr0075136	0.0854186	0.874591	em02
FBtr0075137	1.04841	0.732898	em02
FBtr0075140	0.00582218	0.985003	em02
FBtr0075141	0.544852	0.00409508	em02
FBtr0075142	2.4148	0.000271425	em02
FBtr0075144	1.78898	1.92697e-10	em02
FBtr0075148	1.24426	0.00012334	em02
FBtr0075152	0.348792	0.104459	em02
FBtr0075153	-1.22303	4.08847e-09	em02
FBtr0075154	0.85894	0.0215184	em02
FBtr0075160	1.06095	7.32673e-07	em02
FBtr0075161	0.239032	0.419021	em02
FBtr0075162	0.533776	0.688975	em02
FBtr0075169	1.59082	0.472986	em02
FBtr0075170	0.0789339	0.836115	em02
FBtr0075171	-1.63763	2.63257e-10	em02
FBtr0075173	4.33372	6.88544e-20	em02
FBtr0075175	-0.506998	0.00196765	em02
FBtr0075184	-0.29971	0.326442	em02
FBtr0075187	-0.23219	0.51089	em02
FBtr0075190	1.27568	2.5176e-05	em02
FBtr0075197	-0.695506	0.0059981	em02
FBtr0075199	0.195453	0.715807	em02
FBtr0075201	0.396553	0.153583	em02
FBtr0075205	-1.65069	0.0300384	em02
FBtr0075208	-0.538459	0.168787	em02
FBtr0075209	-0.530101	0.000232414	em02
FBtr0075210	0.6064	0.00240419	em02
FBtr0075215	0.115692	0.783655	em02
FBtr0075216	3.94981	3.06138e-09	em02
FBtr0075217	0.0637041	0.871534	em02
FBtr0075218	-0.0317627	0.957709	em02
FBtr0075219	3.42872	3.36903e-08	em02
FBtr0075220	-1.08738	2.59261e-08	em02
FBtr0075221	4.70674	0.00695482	em02
FBtr0075222	-0.177171	0.450164	em02
FBtr0075223	1.78675	0.282019	em02
FBtr0075227	-0.455963	0.467502	em02
FBtr0075228	0.566871	1.35244e-05	em02
FBtr0075229	-0.199479	0.382662	em02
FBtr0075230	0.488324	0.280316	em02
FBtr0075231	0.32059	0.0556572	em02
FBtr0075232	0.707029	3.98902e-05	em02
FBtr0075239	3.43407	4.66201e-22	em02
FBtr0075245	-0.271695	0.478968	em02
FBtr0075251	0.567024	0.000696648	em02
FBtr0075274	-0.282197	0.297363	em02
FBtr0075275	0.147809	0.373813	em02
FBtr0075278	-0.254023	0.354713	em02
FBtr0075279	-0.463348	0.0131879	em02
FBtr0075282	-0.078487	0.696358	em02
FBtr0075284	2.05339	0.211635	em02
FBtr0075286	0.0930799	0.849069	em02
FBtr0075291	-0.431515	0.874591	em02
FBtr0075293	-0.637562	1.30071e-05	em02
FBtr0075302	4.58784	1.99155e-10	em02
FBtr0075307	2.68839	0.350084	em02
FBtr0075308	0.0783069	0.898352	em02
FBtr0075309	-1.01042	8.19874e-08	em02
FBtr0075310	-0.719084	0.0201985	em02
FBtr0075311	-0.114539	0.514566	em02
FBtr0075312	-0.657037	0.150806	em02
FBtr0075314	0.408254	0.237627	em02
FBtr0075322	0.87427	0.00167805	em02
FBtr0075324	-0.153558	0.543642	em02
FBtr0075326	-1.36677	3.1334e-06	em02
FBtr0075328	-0.468504	0.00337872	em02
FBtr0075329	-0.278937	0.494418	em02
FBtr0075330	0.238986	0.352094	em02
FBtr0075332	-1.15135	1.32624e-16	em02
FBtr0075337	-0.682252	1.80897e-05	em02
FBtr0075338	0.533791	0.842005	em02
FBtr0075339	0.648297	0.0101595	em02
FBtr0075345	-0.048005	0.904552	em02
FBtr0075346	-0.223043	0.156086	em02
FBtr0075347	0.981657	1.50395e-06	em02
FBtr0075352	-0.346062	0.249856	em02
FBtr0075354	-1.80588	0.000599309	em02
FBtr0075355	-0.49286	0.000548626	em02
FBtr0075358	0.745573	7.74247e-05	em02
FBtr0075359	-1.83953	1.51255e-22	em02
FBtr0075360	-0.8421	0.00322771	em02
FBtr0075361	0.463777	0.123199	em02
FBtr0075363	-0.634128	0.0792275	em02
FBtr0075364	-0.395699	0.184408	em02
FBtr0075365	0.805201	0.000190906	em02
FBtr0075371	2.23903	0.242919	em02
FBtr0075379	-0.805135	0.00269053	em02
FBtr0075381	0.595772	0.00420229	em02
FBtr0075384	-1.91764	8.30988e-08	em02
FBtr0075386	-0.0163429	0.98072	em02
FBtr0075390	0.761512	2.8586e-08	em02
FBtr0075395	-2.98992	7.96552e-60	em02
FBtr0075398	3.57169	9.37955e-26	em02
FBtr0075400	2.9932	0.00429158	em02
FBtr0075408	4.10009	6.7596e-16	em02
FBtr0075409	3.97499	3.9063e-11	em02
FBtr0075410	0.742466	1.6513e-06	em02
FBtr0075411	-0.300502	0.334877	em02
FBtr0075412	1.02191	0.00268242	em02
FBtr0075421	0.652608	0.0198161	em02
FBtr0075423	-4.08417	0.0731823	em02
FBtr0075428	0.150583	0.755479	em02
FBtr0075434	3.36188	0.0796224	em02
FBtr0075435	1.2322	4.27375e-05	em02
FBtr0075452	-0.492816	0.197576	em02
FBtr0075453	1.04715	1.67157e-12	em02
FBtr0075457	-0.397266	0.159831	em02
FBtr0075459	-2.50836	9.54252e-08	em02
FBtr0075483	-0.183025	0.524164	em02
FBtr0075490	1.62848	0.829134	em02
FBtr0075491	0.269616	0.599193	em02
FBtr0075492	-0.744668	4.62862e-05	em02
FBtr0075494	-1.14355	1.1826e-07	em02
FBtr0075495	-1.02301	1.04934e-08	em02
FBtr0075497	-0.547332	0.00543066	em02
FBtr0075498	0.623617	0.000212365	em02
FBtr0075499	1.17675	3.39171e-18	em02
FBtr0075504	-0.832859	0.0168002	em02
FBtr0075505	-0.251463	0.134401	em02
FBtr0075506	-0.548562	0.0271021	em02
FBtr0075509	-0.96138	0.00212102	em02
FBtr0075510	0.433178	0.00145233	em02
FBtr0075511	4.22188	4.471e-06	em02
FBtr0075512	1.24858	4.72487e-08	em02
FBtr0075514	1.72005	0.00249745	em02
FBtr0075517	-0.190548	0.521194	em02
FBtr0075519	0.822735	0.000647256	em02
FBtr0075520	0.452143	0.0545049	em02
FBtr0075522	0.703346	0.00449977	em02
FBtr0075527	0.401722	0.165498	em02
FBtr0075528	2.57027	2.26256e-07	em02
FBtr0075535	3.48555	5.37805e-05	em02
FBtr0075536	0.755102	0.0395978	em02
FBtr0075537	0.650184	0.0299225	em02
FBtr0075542	0.0504	0.876676	em02
FBtr0075547	0.0972455	0.818911	em02
FBtr0075548	3.86953	1.17143e-12	em02
FBtr0075549	1.26812	0.00017259	em02
FBtr0075560	-1.10001	0.694221	em02
FBtr0075562	-0.923659	2.79183e-06	em02
FBtr0075563	-0.433415	0.0669153	em02
FBtr0075564	-0.0758636	0.899466	em02
FBtr0075565	-0.451964	0.0060026	em02
FBtr0075570	-0.420221	0.143544	em02
FBtr0075579	3.12396	6.32752e-24	em02
FBtr0075580	3.3212	7.56284e-17	em02
FBtr0075582	0.922757	0.92433	em02
FBtr0075591	-0.879394	0.000143384	em02
FBtr0075595	0.740398	6.69028e-05	em02
FBtr0075596	-0.449843	0.178665	em02
FBtr0075603	-3.11116	0.622841	em02
FBtr0075604	1.57536	0.000214967	em02
FBtr0075605	0.534577	0.0163513	em02
FBtr0075607	2.24968	5.62671e-37	em02
FBtr0075614	3.71301	5.06233e-42	em02
FBtr0075620	2.33643	4.31431e-29	em02
FBtr0075621	2.50127	4.00739e-12	em02
FBtr0075626	0.385083	0.0198152	em02
FBtr0075629	-0.215498	0.590002	em02
FBtr0075633	-0.245726	0.222437	em02
FBtr0075640	-0.343833	0.0350774	em02
FBtr0075641	2.7853	0.124157	em02
FBtr0075642	-0.722529	7.78004e-06	em02
FBtr0075643	0.273324	0.346445	em02
FBtr0075645	-0.220053	0.419885	em02
FBtr0075646	-0.163913	0.686903	em02
FBtr0075647	-0.359215	0.166915	em02
FBtr0075648	0.00146886	0.998091	em02
FBtr0075651	0.0134771	0.971616	em02
FBtr0075657	-1.07202	9.37134e-05	em02
FBtr0075671	1.33411	0.177314	em02
FBtr0075672	-1.32082	1.85335e-18	em02
FBtr0075673	4.73383	3.04354e-14	em02
FBtr0075674	4.17304	2.42807e-19	em02
FBtr0075678	4.90882	5.34996e-15	em02
FBtr0075679	-0.393646	0.145532	em02
FBtr0075691	-0.0787441	0.73134	em02
FBtr0075693	-0.31194	0.325422	em02
FBtr0075697	-0.563826	0.872737	em02
FBtr0075700	-0.307639	0.314087	em02
FBtr0075712	2.54644	0.0601521	em02
FBtr0075715	-0.558814	0.000333175	em02
FBtr0075718	-0.67126	0.0113607	em02
FBtr0075720	3.47348	1.96054e-05	em02
FBtr0075724	0.0401829	0.891242	em02
FBtr0075728	-0.564682	0.0224305	em02
FBtr0075744	0.823281	0.878896	em02
FBtr0075746	1.36325	9.60994e-10	em02
FBtr0075756	-0.721782	0.000380554	em02
FBtr0075759	-0.697681	0.00266013	em02
FBtr0075762	0.301378	0.94128	em02
FBtr0075766	-0.992319	0.0200869	em02
FBtr0075768	-0.321812	0.197832	em02
FBtr0075769	-0.096041	0.776875	em02
FBtr0075774	-2.26481	3.60526e-39	em02
FBtr0075775	-0.456883	0.0722079	em02
FBtr0075777	1.63541	1.32123e-12	em02
FBtr0075778	3.74714	8.09362e-16	em02
FBtr0075780	0.47373	0.0647466	em02
FBtr0075781	-0.908838	9.47812e-05	em02
FBtr0075782	-0.878501	6.34745e-10	em02
FBtr0075784	-0.195762	0.266616	em02
FBtr0075785	-0.801513	0.000397265	em02
FBtr0075787	0.167376	0.7084	em02
FBtr0075791	-1.74211	2.19254e-27	em02
FBtr0075792	-1.66301	4.60784e-23	em02
FBtr0075801	4.56884	2.57333e-34	em02
FBtr0075811	-0.950078	7.48462e-12	em02
FBtr0075812	-1.38926	8.8656e-18	em02
FBtr0075813	-0.422514	0.11856	em02
FBtr0075818	0.155372	0.660118	em02
FBtr0075819	-0.360017	0.248845	em02
FBtr0075825	-0.523968	0.241184	em02
FBtr0075840	0.926789	0.00038343	em02
FBtr0075843	4.859	3.21365e-30	em02
FBtr0075844	4.63917	9.54106e-43	em02
FBtr0075845	1.22536	3.15634e-10	em02
FBtr0075850	3.26982	0.0218889	em02
FBtr0075851	-0.720393	0.000341312	em02
FBtr0075861	0.645948	0.00410094	em02
FBtr0075862	3.60211	1.92187e-07	em02
FBtr0075865	0.501958	0.0423695	em02
FBtr0075866	1.6723	0.306681	em02
FBtr0075873	-0.610431	0.0146164	em02
FBtr0075875	-1.0342	4.66576e-09	em02
FBtr0075876	-0.495156	0.465078	em02
FBtr0075878	-3.60032	0.124479	em02
FBtr0075884	1.13727	0.00864835	em02
FBtr0075886	0.914714	0.665082	em02
FBtr0075895	-0.500154	0.0472426	em02
FBtr0075897	-0.0143097	0.973148	em02
FBtr0075898	0.228502	0.469126	em02
FBtr0075899	-3.23608	2.61844e-09	em02
FBtr0075908	3.80113	1.30909e-06	em02
FBtr0075909	2.55732	9.87875e-06	em02
FBtr0075913	0.178161	0.740613	em02
FBtr0075915	-0.880129	0.00106152	em02
FBtr0075918	0.27375	0.54911	em02
FBtr0075921	-0.308235	0.345503	em02
FBtr0075929	-0.676443	6.341e-05	em02
FBtr0075939	-0.552444	0.0773158	em02
FBtr0075942	-0.677142	0.0424669	em02
FBtr0075944	-0.757161	0.00184683	em02
FBtr0075948	0.309892	0.377051	em02
FBtr0075951	-0.313977	0.236784	em02
FBtr0075952	-0.896729	1.8851e-05	em02
FBtr0075953	1.50778	0.310973	em02
FBtr0075954	-0.0459929	0.924475	em02
FBtr0075957	-0.918065	0.00178697	em02
FBtr0075958	0.347296	0.838696	em02
FBtr0075960	-1.20105	0.000169514	em02
FBtr0075961	-1.30978	7.21855e-09	em02
FBtr0075965	0.395787	0.04042	em02
FBtr0075966	-0.906051	8.65006e-09	em02
FBtr0075967	-1.09808	7.58312e-08	em02
FBtr0075968	0.0207653	0.959232	em02
FBtr0075969	-0.153001	0.535185	em02
FBtr0075972	-3.95817	2.69022e-49	em02
FBtr0075976	1.28541	0.604598	em02
FBtr0075979	4.11674	0.000673835	em02
FBtr0075980	3.60086	0.0337445	em02
FBtr0075981	-0.343637	0.0340652	em02
FBtr0075982	-1.58775	1.37903e-26	em02
FBtr0075985	2.6195	0.00596931	em02
FBtr0075986	0.919252	1.13e-07	em02
FBtr0075991	0.726746	0.0115593	em02
FBtr0075992	0.290609	0.491903	em02
FBtr0075995	0.0196019	0.973284	em02
FBtr0075997	-0.558641	0.0208864	em02
FBtr0075998	0.949121	3.45774e-09	em02
FBtr0076000	-1.11195	0.0203208	em02
FBtr0076001	-1.93472	8.34156e-10	em02
FBtr0076006	0.674734	0.0367287	em02
FBtr0076011	-0.0541007	0.943189	em02
[truncated: 105,849 more rows]
